# Supplementary material for: Beta-2 adrenergic receptor agonism alters astrocyte phagocytic activity and has potential applications to psychiatric disease
Source: Research Square preprint supplement (doi:10.21203/rs.3.rs-2086278/v1), 2022-10-25
Supplement: Supplementary file 1 [file 00b740a071e5989925a7d43e.xlsx]

## Sheet: Sheet1
								c
Increase Phagocytosis					Decrease Phagocytosis					No effect
Drug name	Smile compound	DrugBank ID	Drug Targets (if applicable)		Drug name	Smile compound	DrugBank ID	Drug Targets (if applicable)		Drug name	Smile compound	DrugBank ID	Drug Targets (if applicable)
S(-)-p-Bromotetramisole oxalate	C1CSC2=NC(CN21)C3=CC=C(C=C3)Br				(±)-2-Amino-4-phosphonobutyric acid	C(CP(=O)(O)O)C(C(=O)O)N				DL-alpha-Methyl-p-tyrosine	CC(CC1=CC=C(C=C1)O)(C(=O)O)N	DB00765
L-azetidine-2-carboxylic acid	C1CNC1C(=O)O				Apigenin	C1=CC(=CC=C1C2=CC(=O)C3=C(C=C(C=C3O2)O)O)O	DB07352			6-Methoxy-1,2,3,4-tetrahydro-9H-pyrido[3,4b] indole	COC1=CC2=C(C=C1)NC3=C2CCNC3
(±)-Nipecotic acid	C1CC(CNC1)C(=O)O	DB08849			GR 4661	CN(C)CCC1=CNC2=C1C=C(C=C2)C=CC(=O)NCC3=CC=C(C=C3)OC				Acetamide	CC(=O)N	DB02736
Aurintricarboxylic acid	C1=CC(=C(C=C1C(=C2C=CC(=O)C(=C2)C(=O)O)C3=CC(=C(C=C3)O)C(=O)O)C(=O)O)O				Reserpine	COC1C(CC2CN3CCC4=C(C3CC2C1C(=O)OC)NC5=C4C=CC(=C5)OC)OC(=O)C6=CC(=C(C(=C6)OC)OC)OC	DB00206			Amantadine hydrochloride	C1C2CC3CC1CC(C2)(C3)N	DB00915
Arcaine sulfate	C(CCN=C(N)N)CN=C(N)N				Apomorphine hydrochloride hemihydrate	CN1CCC2=CC=CC3=C2C1CC4=C3C(=C(C=C4)O)O	DB00714			GABA	C(CC(=O)O)CN	DB02530
Allopurinol	C1=C2C(=NC=NC2=O)NN1	DB00437			5'-N-Methyl carboxamidoadenosine	CNC(=O)C1C(C(C(O1)N2C=NC3=C2N=CN=C3N)O)O				Gabaculine hydrochloride	C1C(C=CC=C1C(=O)O)N	DB02054
Amiloride hydrochloride	C1(=C(N=C(C(=N1)Cl)N)N)C(=O)N=C(N)N	DB00594			Paroxetine hydrochloride hemihydrate (MW = 374.83)	C1CNCC(C1C2=CC=C(C=C2)F)COC3=CC4=C(C=C3)OCO4				O-(Carboxymethyl)hydroxylamine hemihydrochloride
L-Buthionine-sulfoximine	CCCCS(=N)(=O)CCC(C(=O)O)N	DB12870			AGN 192403 hydrochloride	CC(C)C1C2CCC(C2)C1N				(±)-2-Amino-7-phosphonoheptanoic acid	C(CCC(C(=O)O)N)CCP(=O)(O)O
Chlorambucil	C1=CC(=CC=C1CCCC(=O)O)N(CCCl)CCCl	DB00291			Amiodarone hydrochloride	CCCCC1=C(C2=CC=CC=C2O1)C(=O)C3=CC(=C(C(=C3)I)OCCN(CC)CC)I	DB01118			N-Acetylprocainamide hydrochloride	CCN(CC)CCNC(=O)C1=CC=C(C=C1)NC(=O)C	DB11102
1-(3-Chlorophenyl)piperazine dihydrochloride	C1CN(CCN1)C2=CC(=CC=C2)Cl	DB12110			Aminobenztropine	CN1C2CCC1CC(C2)OC(C3=CC=CC=C3)C4=CC=CC=C4N				Actinonin	CCCCCC(CC(=O)NO)C(=O)NC(C(C)C)C(=O)N1CCCC1CO
8-(4-Chlorophenylthio)-cAMP sodium	C1C2C(C(C(O2)N3C4=C(C(=NC=N4)N)N=C3SC5=CC=C(C=C5)Cl)O)OP(=O)(O1)O				(±)-HA-966	C1CN(C(=O)C1N)O				N-Phenylanthranilic acid	C1=CC=C(C=C1)NC2=CC=CC=C2C(=O)O
Clonidine hydrochloride	C1CN=C(N1)NC2=C(C=CC=C2Cl)Cl	DB00575			H-89	C1=CC2=C(C=CN=C2)C(=C1)S(=O)(=O)NCCNCC=CC3=CC=C(C=C3)Br	DB07995			S-(4-Nitrobenzyl)-6-thioguanosine	C1=CC(=CC=C1CSC2=NC(=NC3=C2N=CN3C4C(C(C(O4)CO)O)O)N)[N+](=O)[O-]
7-Chloro-4-hydroxy-2-phenyl-1,8-naphthyridine	C1=CC=C(C=C1)C2=CC(=O)C3=C(N2)N=C(C=C3)Cl				Androsterone	CC12CCC(CC1CCC3C2CCC4(C3CCC4=O)C)O				N-(4-Aminobutyl)-5-chloro-2-naphthalenesulfonamide hydrochloride	C1=CC2=C(C=CC=C2Cl)C(=C1)S(=O)(=O)NCCCCN
Clofibrate	CCOC(=O)C(C)(C)OC1=CC=C(C=C1)Cl	DB00636			Alprenolol hydrochloride	CC(C)NCC(COC1=CC=CC=C1CC=C)O	DB00866			Aminophylline ethylenediamine	CN1C2=C(C(=O)N(C1=O)C)NC=N2.CN1C2=C(C(=O)N(C1=O)C)NC=N2.C(CN)N	DB01223
CGS-21680 hydrochloride	CCNC(=O)C1C(C(C(O1)N2C=NC3=C2N=C(N=C3N)NCCC4=CC=C(C=C4)CCC(=O)O)O)O				Brefeldin A from Penicillium brefeldianum	CC1CCCC=CC2CC(CC2(CC=CC(=O)O1)O)O	DB07348			3'-Azido-3'-deoxythymidine	CC1=CN(C(=O)NC1=O)C2CC(C(O2)CO)N=[N+]=[N-]
Moxonidine hydrochloride		DB09242			(+)-Bromocriptine methanesulfonate	CC(C)CC1C(=O)N2CCCC2C3(N1C(=O)C(O3)(C(C)C)NC(=O)C4CN(C5CC6=C(NC7=CC=CC(=C67)C5=C4)Br)C)O	DB01200			AC 915 oxalate	C1CCN(C1)CCOC(=O)CC2=CC(=C(C=C2)Cl)Cl
Disopyramide phosphate		DB00280			CP55940	CCCCCCC(C)(C)C1=CC(=C(C=C1)C2CC(CCC2CCCO)O)O				5-(N,N-Dimethyl)amiloride hydrochloride	CN(C)C1=NC(=C(N=C1Cl)C(=O)N=C(N)N)N
Amfonelic acid	CCN1C=C(C(=O)C2=C1N=C(C=C2)CC3=CC=CC=C3)C(=O)O				ML-9	C1CNCCN(C1)S(=O)(=O)C2=CC=CC3=C2C=CC=C3Cl				(±)-2-Amino-5-phosphonopentanoic acid	C(CC(C(=O)O)N)CP(=O)(O)O
5-fluoro-5'-deoxyuridine		DB12947			Bromoacetyl alprenolol menthane	CC1(CCCC(C1)C(C)(C)NC(=O)CBr)NCC(COC2=CC=CC=C2CC=C)O				Sodium Taurocholate	CC(CCC(=O)NCCS(=O)(=O)O)C1CCC2C1(C(CC3C2C(CC4C3(CCC(C4)O)C)O)O)C	DB04348
5-Fluorouracil		DB00544			R(+)-6-Bromo-APB hydrobromide	C=CCN1CCC2=C(C(=C(C=C2C(C1)C3=CC=CC=C3)O)O)Br				Methotrexate	CN(CC1=CN=C2C(=N1)C(=NC(=N2)N)N)C3=CC=C(C=C3)C(=O)NC(CCC(=O)O)C(=O)O	DB00563
Fiduxosin hydrochloride	COC1=CC=CC2=C1C3CN(CC3CO2)CCCCN4C(=O)C5=C(C6=NC(=CN=C6S5)C7=CC=CC=C7)NC4=O				Benserazide hydrochloride	C1=CC(=C(C(=C1CNNC(=O)C(CO)N)O)O)O	DB12783			TMB-8 hydrochloride	CCN(CC)CCCCCCCCOC(=O)C1=CC(=C(C(=C1)OC)OC)OC
Foliosidine					BRL 50481	CC1=C(C=C(C=C1)[N+](=O)[O-])S(=O)(=O)N(C)C				S-(p-Azidophenacyl)glutathione	C1=CC(=CC=C1C(=O)CSCC(C(=O)NCC(=O)O)NC(=O)CCC(C(=O)O)N)N=[N+]=[N-]
Glibenclamide	COC1=C(C=C(C=C1)Cl)C(=O)NCCC2=CC=C(C=C2)S(=O)(=O)NC(=O)NC3CCCCC3	DB01016			Chelerythrine chloride	C[N+]1=C2C(=C3C=CC(=C(C3=C1)OC)OC)C=CC4=CC5=C(C=C42)OCO5				Acetyl-beta-methylcholine chloride	CC(C[N+](C)(C)C)OC(=O)C	DB06709
Formoterol		DB00983			Clemastine fumarate	CC(C1=CC=CC=C1)(C2=CC=C(C=C2)Cl)OCCC3CCCN3C	DB00283			AA-861	CC1=C(C(=O)C(=C(C1=O)C)CCCCC#CCCCC#CCO)C
(S)-ENBA	C1CC2CC1CC2NC3=NC=NC4=C3N=CN4C5C(C(C(O5)CO)O)O				Caffeic acid phenethyl ester	C1=CC=C(C=C1)CCOC(=O)C=CC2=CC(=C(C=C2)O)O				Azathioprine	CN1C=NC(=C1SC2=NC=NC3=C2NC=N3)[N+](=O)[O-]	DB00993
DL-threo-beta-hydroxyaspartic acid	C(C(C(=O)O)O)(C(=O)O)N				Calmidazolium chloride	C1=CC(=CC=C1C(C2=CC=C(C=C2)Cl)N3C=C[N+](=C3)CC(C4=C(C=C(C=C4)Cl)Cl)OCC5=C(C=C(C=C5)Cl)Cl)Cl				L-732,138	CC(=O)NC(CC1=CNC2=CC=CC=C21)C(=O)OCC3=CC(=CC(=C3)C(F)(F)F)C(F)(F)F
Hypotaurine					Z-L-Phe chloromethyl ketone	C1=CC=C(C=C1)CC(C(=O)CCl)NC(=O)OCC2=CC=CC=C2				Amifostine	C(CN)CNCCSP(=O)(O)O	DB01143
Gabapentin		DB00996			CGP-74514A hydrochloride	CCN1C=NC2=C1N=C(N=C2NC3=CC(=CC=C3)Cl)NC4CCCCC4N				Atropine methyl bromide	C[N+]1(C2CCC1CC(C2)OC(=O)C(CO)C3=CC=CC=C3)C.[N+](=O)([O-])[O-]
IEM-1460					Chloroquine diphosphate	CCN(CC)CCCC(C)NC1=C2C=CC(=CC2=NC=C1)Cl	DB00608			5-Aminovaleric acid hydrochloride	C(CCN)CC(=O)O
Histamine dihydrochloride		DB05381			Clomipramine hydrochloride	CN(C)CCCN1C2=CC=CC=C2CCC3=C1C=C(C=C3)Cl	DB01242			4-Aminopyridine	C1=CN=CC=C1N	DB06637
Idarubicin		DB01177			Carbetapentane citrate	CCN(CC)CCOCCOC(=O)C1(CCCC1)C2=CC=CC=C2.C(C(=O)O)C(CC(=O)O)(C(=O)O)O	DB11186			p-Aminoclonidine hydrochloride	C1CN=C(N1)NC2=C(C=C(C=C2Cl)N)Cl	DB00964
(+)-Hydrastine					Clotrimazole	C1=CC=C(C=C1)C(C2=CC=CC=C2)(C3=CC=CC=C3Cl)N4C=CN=C4	DB00257			Aminopterin	C1=CC(=CC=C1C(=O)NC(CCC(=O)O)C(=O)O)NCC2=CN=C3C(=N2)C(=NC(=N3)N)N	DB08878
Imidazole-4-acetic acid hydrochloride					Calcimycin	CC1CCC2(C(CC(C(O2)C(C)C(=O)C3=CC=CN3)C)C)OC1CC4=NC5=C(O4)C=CC(=C5C(=O)O)NC				5-azacytidine	C1=NC(=NC(=O)N1C2C(C(C(O2)CO)O)O)N	DB00928
5-Hydroxy-L-tryptophan		DB02959			CGS-12066A maleate	CN1CCN(CC1)C2=NC3=C(C=CC(=C3)C(F)(F)F)N4C2=CC=C4				9-Amino-1,2,3,4-tetrahydroacridine hydrochloride	C1CCC2=NC3=CC=CC=C3C(=C2C1)N	DB00382
S(+)-Isoproterenol (+)-bitartrate		DB01064			Y-27632 dihydrochloride	CC(C1CCC(CC1)C(=O)NC2=CC=NC=C2)N				Acyclovir	C1=NC2=C(N1COCCO)NC(=NC2=O)N	DB00787
p-Iodoclonidine hydrochloride	C1CN=C(N1)NC2=C(C=C(C=C2Cl)I)Cl				WB-4101 hydrochloride	COC1=C(C(=CC=C1)OC)OCCNCC2COC3=CC=CC=C3O2				Acetylsalicylic acid	CC(=O)OC1=CC=CC=C1C(=O)O	DB00945
3-Iodo-L-tyrosine	C1=CC(=C(C=C1CC(C(=O)O)N)I)O				Dequalinium dichloride	CC1=[N+](C2=CC=CC=C2C(=C1)N)CCCCCCCCCC[N+]3=C(C=C(C4=CC=CC=C43)N)C	DB04209			Acetazolamide	CC(=O)NC1=NN=C(S1)S(=O)(=O)N	DB00819
L-N5-(1-Iminoethyl)ornithine hydrochloride	CC(=NCCCC(C(=O)O)N)N				Droperidol	C1CN(C=CC1N2C3=CC=CC=C3NC2=O)CCCC(=O)C4=CC=C(C=C4)F	DB00450			Amperozide hydrochloride	CCNC(=O)N1CCN(CC1)CCCC(C2=CC=C(C=C2)F)C3=CC=C(C=C3)F	DB08927
Indomethacin morpholinylamide	CC1=C(C2=C(N1C(=O)C3=CC=C(C=C3)Cl)C=CC(=C2)OC)CC(=O)N4CCOCC4	DB00328			10-(alpha-Diethylaminopropionyl)-phenothiazine hydrochloride	CCN(CC)C(C)C(=O)N1C2=CC=CC=C2SC3=CC=CC=C31				Atropine sulfate	CN1C2CCC1CC(C2)OC(=O)C(CO)C3=CC=CC=C3.CN1C2CCC1CC(C2)OC(=O)C(CO)C3=CC=CC=C3	DB00572
(±)-Ibuprofen		DB01050			Cirazoline hydrochloride	C1CC1C2=CC=CC=C2OCC3=NCCN3	DB09202			3-aminobenzamide	C1=CC(=CC(=C1)N)C(=O)N
K 185	CCCC(=O)NCCC1=C2C3=CC=CC=C3CCCN2C4=C1C=C(C=C4)OC				Dihydroouabain	CC1C(C(C(C(O1)OC2CC(C3(C4C(CCC3(C2)O)C5(CCC(C5(CC4O)C)C6CC(=O)OC6)O)CO)O)O)O)O				N-Acetyl-5-hydroxytryptamine	CC(=O)NCCC1=CNC2=C1C=C(C=C2)O
5-Methoxy DMT oxalate	CN(C)CCC1=CNC2=C1C=C(C=C2)OC	DB14010			Desipramine hydrochloride	CNCCCN1C2=CC=CC=C2CCC3=CC=CC=C31	DB01151			5-(N-Ethyl-N-isopropyl)amiloride	CCN(C1=NC(=C(N=C1Cl)C(=O)N=C(N)N)N)C(C)C
MRS 1754	CCCN1C2=C(C(=O)N(C1=O)CCC)NC(=N2)C3=CC=C(C=C3)OCC(=O)NC4=CC=C(C=C4)C#N				CGP 20712A methanesulfonate	CN1C=C(N=C1C2=CC=C(C=C2)OCC(CNCCOC3=CC(=C(C=C3)O)C(=O)N)O)C(F)(F)F				AL-8810	C1C(C(C(C1F)C=CC(C2CC3=CC=CC=C3C2)O)CC=CCCCC(=O)O)O
Metaproterenol hemisulfate	CC(C)NCC(C1=CC(=CC(=C1)O)O)O.CC(C)NCC(C1=CC(=CC(=C1)O)O)O				Dobutamine hydrochloride	CC(CCC1=CC=C(C=C1)O)NCCC2=CC(=C(C=C2)O)O	DB00841			Amiprilose hydrochloride	CC1(OC2C(C(OC2O1)C(CO)O)OCCCN(C)C)C
Moxonidine hydrochloride		DB09242			Diphenyleneiodonium chloride	C1=CC=C2C(=C1)C3=CC=CC=C3[I+]2				5-(N-Methyl-N-isobutyl)amiloride	CC(C)CN(C)C1=NC(=C(N=C1Cl)C(=O)N=C(N)N)N
Mevastatin		DB06693			Fluphenazine		DB00623			Arecoline hydrobromide	CN1CCC=C(C1)C(=O)OC	DB04365
N6-Methyladenosine					Salmeterol xinafoate		DB00938			Aminoguanidine hemisulfate	C(=NN)(N)N.C(=NN)(N)N.OS(=O)(=O)O
1-Deoxynojirimycin hydrochloride	C1C(C(C(C(N1)CO)O)O)O				Dihydrexidine hydrochloride	C1CC2=CC(=C(C=C2C3C1NCC4=CC=CC=C34)O)O	DB12890			Azelaic acid	C(CCCC(=O)O)CCCC(=O)O	DB00548
S-Methyl-L-thiocitrulline acetate					D-ribofuranosylbenzimidazole	C1=C2C(=CC(=C1Cl)Cl)N=C(N2)C3C(C(C(O3)CO)O)O				Atropine methyl nitrate	C[N+]1(C2CCC1CC(C2)OC(=O)C(CO)C3=CC=CC=C3)C
MDL 105,519	C1=CC=C(C=C1)C(=CC2=C(NC3=CC(=CC(=C32)Cl)Cl)C(=O)O)C(=O)O				(±)-Chloro-APB hydrobromide	C=CCN1CCC2=C(C(=C(C=C2C(C1)C3=CC=CC=C3)O)O)Cl				(±)-Norepinephrine (+)bitartrate	C1=CC(=C(C=C1C(CN)O)O)O	DB00368
NF 023	C1=CC(=CC(=C1)NC(=O)NC2=CC=CC(=C2)C(=O)NC3=C4C(=CC(=CC4=C(C=C3)S(=O)(=O)O)S(=O)(=O)O)S(=O)(=O)O)C(=O)NC5=C6C(=CC(=CC6=C(C=C5)S(=O)(=O)O)S(=O)(=O)O)S(=O)(=O)O				Dequalinium analog, C-14 linker	CC1=[N+](C2=CC=CC=C2C(=C1)N)CCCCCCCCCCCCCC[N+]3=C(C=C(C4=CC=CC=C43)N)C				3-Aminopropionitrile fumarate	C(CN)C#N.C(CN)C#N.C(=CC(=O)O)C(=O)O
L-alpha-Methyl-p-tyrosine	CC(CC1=CC=C(C=C1)O)(C(=O)O)N	DB00765			PD 169316					1-Aminobenzotriazole	C1=CC=C2C(=C1)N=NN2N
2-Methylthioadenosine diphosphate trisodium	CSC1=NC2=C(C(=N1)N)N=CN2C3C(C(C(O3)COP(=O)(O)OP(=O)(O)O)O)O				3',4'-Dichlorobenzamil	C1=CC(=C(C=C1CN=C(N)NC(=O)C2=C(N=C(C(=N2)Cl)N)N)Cl)Cl				Sandoz 58-035	CCCCCCCCCC[Si](C)(C)CCC(=O)NC(CC1=CC=C(C=C1)C)C2=CC=CC=C2
Metrifudil					R(-)-Propylnorapomorphine hydrochloride	CCCN1CCC2=CC=CC3=C2C1CC4=C3C(=C(C=C4)O)O				Acetylthiocholine chloride	CC(=O)SCC[N+](C)(C)C
Neostigmine bromide		DB01400			R(-)-2,10,11-Trihydroxyaporphine hybrobromide	CN1CCC2=C3C1CC4=C(C3=CC(=C2)O)C(=C(C=C4)O)O				A-315456	CCS(=O)(=O)NC1=CC=CC(=C1)C(=C2CCCCC2)C3=CN=CN3
NG-Nitro-L-arginine	C(CC(C(=O)O)N)CN=C(N)N[N+](=O)[O-]	DB04223			GBR-12909 dihydrochloride	C1CN(CCN1CCCC2=CC=CC=C2)CCOC(C3=CC=C(C=C3)F)C4=CC=C(C=C4)F	DB03701			Agmatine sulfate	C(CCN=C(N)N)CN	DB08838
Nimustine hydrochloride	CC1=NC=C(C(=N1)N)CNC(=O)N(CCCl)N=O	DB13069			Dextrorphan D-tartrate	CN1CCC23CCCCC2C1CC4=C3C=C(C=C4)O				Tryptamine hydrochloride	C1=CC=C2C(=C1)C(=CN2)CCN	DB08653
alpha-Methyl-5-hydroxytryptamine maleate	CC(CC1=CNC2=C1C=C(C=C2)O)N				4-Diphenylacetoxy-N-(2-chloroethyl)piperidine hydrochloride	C1CN(CCC1OC(=O)C(C2=CC=CC=C2)C3=CC=CC=C3)CCCl				4-Amino-1,8-naphthalimide	C1=CC2=C(C=CC3=C2C(=C1)C(=O)NC3=O)N
MDL 26,630 trihydrochloride	C1CC(NC(C1)CCN)CCN				7-Cyclopentyl-5-(4-phenoxy)phenyl-7H-pyrrolo[2,3-d]pyrimidin-4-ylamine					3-Amino-1-propanesulfonic acid sodium	C(CN)CS(=O)(=O)O
NG-Nitro-L-arginine methyl ester hydrochloride	COC(=O)C(CCCN=C(N)N[N+](=O)[O-])N				N,N-Dihexyl-2-(4-fluorophenyl)indole-3-acetamide	CCCCCCN(CCCCCC)C(=O)CC1=C(NC2=CC=CC=C21)C3=CC=C(C=C3)F				(±)-2-Amino-3-phosphonopropionic acid	C(C(C(=O)O)N)P(=O)(O)O
Methapyrilene hydrochloride		DB04819			R(-)-2,10,11-Trihydroxy-N-propylnoraporphine hydrobromide	CCCN1CCC2=C3C1CC4=C(C3=CC(=C2)O)C(=C(C=C4)O)O				4-Androsten-4-ol-3,17-dione	CC12CCC(=O)C(=C1CCC3C2CCC4(C3CCC4=O)C)O	DB08905
NF449 octasodium salt					Emetine dihydrochloride hydrate	CCC1CN2CCC3=CC(=C(C=C3C2CC1CC4C5=CC(=C(C=C5CCN4)OC)OC)OC)OC	DB13393			4-Aminobenzamidine dihydrochloride	C1=CC(=CC=C1C(=N)N)N
Nitrendipine		DB01054			(R,R)-cis-Diethyl tetrahydro-2,8-chrysenediol	CCC1CC2=C(C=CC(=C2)O)C3=C1C4=C(CC3CC)C=C(C=C4)O				5-Fluoroindole-2-carboxylic acid	C1=CC2=C(C=C1F)C=C(N2)C(=O)O
Olomoucine		DB02116			Eliprodil		DB12869			1-Aminocyclopropanecarboxylic acid hydrochloride	C1CC1(C(=O)O)N
Oleic Acid		DB04224			(+)-Butaclamol hydrochloride	CC(C)(C)C1(CCN2CC3C4=CC=CC=C4CCC5=C3C(=CC=C5)C2C1)O				N-arachidonylglycine	CCCCCC=CCC=CCC=CCC=CCCCC(=O)NCC(=O)O
Naloxonazine dihydrochloride	C=CCN1CCC23C4C(=NN=C5CCC6(C7CC8=C9C6(C5OC9=C(C=C8)O)CCN7CC=C)O)CCC2(C1CC1=C3C(=C(C=C1)O)O4)O				GBR-12935 dihydrochloride	C1CN(CCN1CCCC2=CC=CC=C2)CCOC(C3=CC=CC=C3)C4=CC=CC=C4				W-7 hydrochloride	C1=CC2=C(C=CC=C2Cl)C(=C1)S(=O)(=O)NCCCCCCN
Palmitoylethanolamide		DB14043			S-(+)-Fluoxetine hydrochloride	CNCCC(C1=CC=CC=C1)OC2=CC=C(C=C2)C(F)(F)F	DB00472			L-Arginine	C(CC(C(=O)O)N)CN=C(N)N	DB00125
NS 2028	C1C2=NOC(=O)N2C3=C(O1)C=CC(=C3)Br				(-)-Eseroline fumarate	CC12CCN(C1N(C3=C2C=C(C=C3)O)C)C				2-(2-Aminoethyl)isothiourea dihydrobromide	C(CSC(=N)N)N
5alpha-Pregnan-3alpha-ol-11,20-dione	CC(=O)C1CCC2C1(CC(=O)C3C2CCC4C3(CCC(C4)O)C)C	DB11371			rac-2-Ethoxy-3-hexadecanamido-1-propylphosphocholine	CCCCCCCCCCCCCCCC(=O)NCC(COP(=O)([O-])OCC[N+](C)(C)C)OCC				2-Hydroxysaclofen	C1=CC(=CC=C1C(CN)(CS(=O)(=O)O)O)Cl
(±)-Octopamine hydrochloride	C1=CC(=CC=C1C(CN)O)O	DB13251			Ebselen		DB12610			N-Acetyl-L-Cysteine	CC(=O)NC(CS)C(=O)O	DB06151
Oxiracetam		DB13601			Ellipticine	CC1=C2C(=C(C3=C1C=CN=C3)C)C4=CC=CC=C4N2				6-Aminohexanoic acid	C(CCC(=O)O)CCN	DB00513
cis-(±)-8-OH-PBZI hydrobromide	CCCN1CCC2C1CCC3=C2C=C(C=C3)O				Flunarizine dihydrochloride		DB04841			Altretamine	CN(C)C1=NC(=NC(=N1)N(C)C)N(C)C	DB00488
1-Phenylbiguanide	C1=CC=C(C=C1)N=C(N)N=C(N)N	DB13100			Felbamate		DB00949			Adenosine 3',5'-cyclic monophosphate	C1C2C(C(C(O2)N3C=NC4=C3N=CN=C4N)O)OP(=O)(O1)O	DB02527
S(-)-3PPP hydrochloride	CCCN1CCCC(C1)C2=CC(=CC=C2)O				GW5074	C1=CC2=C(C=C1I)C(=CC3=CC(=C(C(=C3)Br)O)Br)C(=O)N2				(±)-AMT hydrochloride	CC1CCN=C(S1)N
Prilocaine hydrochloride	CCCNC(C)C(=O)NC1=CC=CC=C1C	DB00750			Forskolin		DB02587			1-Allyl-3,7-dimethyl-8-p-sulfophenylxanthine	CN1C2=C(N=C1C3=CC=C(C=C3)S(=O)(=O)O)N(C(=O)N(C2=O)CC=C)C
Quinelorane dihydrochloride	CCCN1CCCC2C1CC3=CN=C(N=C3C2)N				R-(-)-Fluoxetine hydrochloride	CNCCC(C1=CC=CC=C1)OC2=CC=C(C=C2)C(F)(F)F.Cl	DB00472			Acetohexamide	CC(=O)C1=CC=C(C=C1)S(=O)(=O)NC(=O)NC2CCCCC2	DB00414
N6-2-Phenylethyladenosine	C1=CC=C(C=C1)CCNC2=NC=NC3=C2N=CN3C4C(C(C(O4)CO)O)O				rac-2-Ethoxy-3-octadecanamido-1-propylphosphocholine	CCCCCCCCCCCCCCCCCC(=O)NCC(COP(=O)([O-])OCC[N+](C)(C)C)OCC				cis-Azetidine-2,4-dicarboxylic acid	C1C(NC1C(=O)O)C(=O)O
S(-)-Pindolol	CC(C)NCC(COC1=CC=CC2=C1C=CN2)O	DB00960			GYKI 52895					2,3-Butanedione monoxime	CC(=NO)C(=O)C
PD 98,059	COC1=CC=CC(=C1N)C2=CC(=O)C3=CC=CC=C3O2				H-7 dihydrochloride	CC1CNCCN1S(=O)(=O)C2=CC=CC3=C2C=CN=C3				L-2-aminoadipic acid	C(CC(C(=O)O)N)CC(=O)O
(±)-Quinpirole dihydrochloride	CCCN1CCCC2C1CC3=C(C2)NN=C3				L-165,041	CCCC1=C(C=CC(=C1O)C(=O)C)OCCCOC2=CC=C(C=C2)OCC(=O)O				ATPO	CC(C)(C)C1=C(C(=NO1)OCP(=O)(O)O)CC(C(=O)O)N
(+)-Quisqualic acid	C(C(C(=O)O)N)N1C(=O)NC(=O)O1	DB02999			Indirubin-3'-oxime	C1=CC=C2C(=C1)C(=C(N2)C3=C4C=CC=CC4=NC3=O)NO	DB02052			N-Acetyldopamine monohydrate	CC(=O)NCCC1=CC(=C(C=C1)O)O
Spiperone hydrochloride	C1CN(CCC12C(=O)NCN2C3=CC=CC=C3)CCCC(=O)C4=CC=C(C=C4)F				NSC 95397	C1=CC=C2C(=C1)C(=O)C(=C(C2=O)SCCO)SCCO				L(-)-Norepinephrine bitartrate	C1=CC(=C(C=C1C(CN)O)O)O	DB00368
Ruthenium red	[NH2-].[NH2-].[NH2-].[NH2-].[NH2-].[NH2-].[NH2-].[NH2-].[NH2-].[NH2-].[NH2-].[NH2-].[NH2-].[NH2-].O.O.[Ru+4].[Ru+5].[Ru+5]				Kenpaullone	C1C2=C(C3=CC=CC=C3NC1=O)NC4=C2C=C(C=C4)Br				PNU-37887A	C1CCC(CC1)N=C(NC23CC4CC(C2)CC(C4)C3)N5CCOCC5
Sodium nitroprusside dihydrate	CN1C2CC(CC1C3C2O3)OC(=O)C(CO)C4=CC=CC=C4				LY-367,265	C1CC2=C3C(=CC=C2)N(S(=O)(=O)N3C1)CCN4CCC(=CC4)C5=CNC6=C5C=CC(=C6)F				trans-(±)-ACPD	C1CC(CC1C(=O)O)(C(=O)O)N
(-)-Scopolamine hydrobromide		DB00747			Idazoxan hydrochloride	C1CN=C(N1)C2COC3=CC=CC=C3O2	DB12551			SKF 97541 hydrochloride	CP(=O)(CCCN)O
Spermine tetrahydrochloride	CN=C1N=C(N(S1)C2=CC=CC=C2)C3=CC=CC=C3				LY-310,762 hydrochloride	CC1(C2=CC=CC=C2N(C1=O)CCN3CCC(CC3)C(=O)C4=CC=C(C=C4)F)C				trans-Azetidine-2,4-dicarboxylic acid	C1C(NC1C(=O)O)C(=O)O
13-cis-retinoic acid		DB00982			VER-3323 hemifumarate salt	CC(CN1CCC2=C1C=C(C=C2)Br)N.CC(CN1CCC2=C1C=C(C=C2)Br)N.C(=CC(=O)O)C(=O)O				SB 222200	CCC(C1=CC=CC=C1)NC(=O)C2=C(C(=NC3=CC=CC=C32)C4=CC=CC=C4)C
(±)-Synephrine		DB09203			R(+)-IAA-94	CC1(CC2=CC(=C(C(=C2C1=O)Cl)Cl)OCC(=O)O)C3CCCC3				N-Acetyltryptamine	CC(=O)NCCC1=CNC2=CC=CC=C21
Sulfaphenazole		DB06729			Loratadine		DB00455			Aminoguanidine hydrochloride	C(=NN)(N)N	DB05383
Semicarbazide hydrochloride	CC(=O)NNC(=O)N1CC2=CC=CC=C2OC3=C1C=C(C=C3)Cl				Indatraline hydrochloride	CNC1CC(C2=CC=CC=C12)C3=CC(=C(C=C3)Cl)Cl				5-(N,N-hexamethylene)amiloride	C1CCCN(CC1)C2=NC(=C(N=C2Cl)C(=O)N=C(N)N)N	DB00594
SC 19220	CC(C)(C)NCC(C1=CC(=C(C=C1)O)CO)O.CC(C)(C)NCC(C1=CC(=C(C=C1)O)CO)O				Labetalol hydrochloride	CC(CCC1=CC=CC=C1)NCC(C2=CC(=C(C=C2)O)C(=O)N)O	(±)-Atenolol,			Antozoline hydrochloride	C1=CC=C(C=C1)CN(CC2=NC=CN2)C3=CC=CC=C3
Seglitide	CC1C(=O)NC(C(=O)NC(C(=O)NC(C(=O)NC(C(=O)NC(C(=O)N1C)CC2=CC=CC=C2)C(C)C)CCCCN)CC3=CNC4=CC=CC=C43)CC5=CC=C(C=C5)O				L-Leucinethiol, oxidized dihydrochloride	CC(C)CC(CSSCC(CC(C)C)N)N				(+)-N-Allylnormetazocine hydrochloride	CC1C2CC3=C(C1(CCN2CC=C)C)C=C(C=C3)O
(E)-4-amino-2-butenoic acid	C(C=CC(=O)O)N				Ivermectin		DB00602			(±)-N-Allylnormetazocine hydrochloride	CC1C2CC3=C(C1(CCN2CC=C)C)C=C(C=C3)O
Tetradecylthioacetic acid					3-(1H-Imidazol-4-yl)propyl di(p-fluorophenyl)methyl ether hydrochloride	C1=CC(=CC=C1C(C2=CC=C(C=C2)F)OCCCC3=CN=CN3)F				cis-4-Aminocrotonic acid	C(C=CC(=O)O)N
Suramin hexasodium		DB04786			Imiloxan hydrochloride	CCN1C=CN=C1CC2COC3=CC=CC=C3O2				1-benzoyl-5-methoxy-2-methylindole-3-acetic acid	CC1=C(C2=C(N1C(=O)C3=CC=CC=C3)C=CC(=C2)OC)CC(=O)O
Theobromine		DB01412	f		Ketotifen fumarate		DB00920			Amitriptyline hydrochloride	CN(C)CCC=C1C2=CC=CC=C2CCC3=CC=CC=C31	DB00321
Thio-NADP sodium	C1=CC(=C[N+](=C1)C2C(C(C(O2)COP(=O)(O)OP(=O)(O)OCC3C(C(C(O3)N4C=NC5=C4N=CN=C5N)OP(=O)(O)O)O)O)O)C(=S)N				Loperamide hydrochloride	CN(C)C(=O)C(CCN1CCC(CC1)(C2=CC=C(C=C2)Cl)O)(C3=CC=CC=C3)C4=CC=CC=C4	DB00836			BW 284c51	C[N+](C)(CCC(=O)CC[N+](C)(C)C1=CC=C(C=C1)CC=C)C2=CC=C(C=C2)CC=C
Tyrphostin 25					LY-294,002 hydrochloride	C1COCCN1C2=CC(=O)C3=C(O2)C(=CC=C3)C4=CC=CC=C4				4-Androstene-3,17-dione	CC12CCC(=O)C=C1CCC3C2CCC4(C3CCC4=O)C	DB01536
Tolazamide		DB00839			JWH-015	CCCN1C(=C(C2=CC=CC=C21)C(=O)C3=CC4=CC=CC=C4C=C3)C				Aniracetam	COC1=CC=C(C=C1)C(=O)N2CCCC2=O	DB04599
(±)-Taxifolin		DB02224			Kynurenic acid		DB11937			Amoxapine	C1CN(CCN1)C2=NC3=CC=CC=C3OC4=C2C=C(C=C4)Cl	DB00543
Tyrphostin AG 835					beta-Lapachone	CC1(CCC2=C(O1)C3=CC=CC=C3C(=O)C2=O)C	DB11948			1-Amino-1-cyclohexanecarboxylic acid hydrochloride	C1CCC(CC1)(C(=O)O)N
Tropicamide		DB00809			Lonidamine		DB06266			N6-2-(4-Aminophenyl)ethyladenosine	C1=CC(=CC=C1CCNC2=NC=NC3=C2N=CN3C4C(C(C(O4)CO)O)O)N
Thiocitrulline		DB03953			Metergoline		DB13520			AIDA	C1CC(C2=C1C=C(C=C2)C(=O)O)(C(=O)O)N
4-Imidazoleacrylic acid	C1=C(NC=N1)C=CC(=O)O	DB01971			Mibefradil dihydrochloride		DB01388			p-Benzoquinone	C1=CC(=O)C=CC1=O
WB 64					L-733,060 hydrochloride	C1CC(C(NC1)C2=CC=CC=C2)OCC3=CC(=CC(=C3)C(F)(F)F)C(F)(F)F				(±)-Atenolol	CC(C)NCC(COC1=CC=C(C=C1)CC(=O)N)O
(±)-gamma-Vinyl GABA	C=CC(CCC(=O)O)N	DB01080			L-703,606 oxalate	C1CN2CCC1C(C2C(C3=CC=CC=C3)C4=CC=CC=C4)NCC5=CC=CC=C5I				Adenosine	C1=NC2=C(C(=N1)N)N=CN2C3C(C(C(O3)CO)O)O	DB00640
Xanthine amine congener	CCCN1C2=C(C(=O)N(C1=O)CCC)NC(=N2)C3=CC=C(C=C3)OCC(=O)NCCN									(±)-p-Aminoglutethimide	CCC1(CCC(=O)NC1=O)C2=CC=C(C=C2)N	DB00357
							43			1,3-Diethyl-8-phenylxanthine	CCN1C2=C(C(=O)N(C1=O)CC)NC(=N2)C3=CC=CC=C3
		52								Alaproclate hydrochloride	CC(C(=O)OC(C)(C)CC1=CC=C(C=C1)Cl)N	DB13233
										Agroclavine	CC1=CC2C(CC3=CNC4=CC=CC2=C34)N(C1)C
							753			A-77636 hydrochloride	C1C2CC3CC1CC(C2)(C3)C4CC5=C(C=CC(=C5O)O)C(O4)CN
										8-Bromo-cGMP sodium	C1C2C(C(C(O2)N3C4=C(C(=O)N=C(N4)N)N=C3Br)O)OP(=O)(O1)O
										5alpha-Androstane-3alpha,17beta-diol	CC12CCC(CC1CCC3C2CCC4(C3CCC4O)C)O	DB01530
										4-(2-Aminoethyl)benzenesulfonyl fluoride hydrochloride	C1=CC(=CC=C1CCN)S(=O)(=O)F	DB07347
										L-Aspartic acid	C(C(C(=O)O)N)C(=O)O	DB00128
										8-(p-Sulfophenyl)theophylline	CN1C2=C(C(=O)N(C1=O)C)NC(=N2)C3=CC=C(C=C3)S(=O)(=O)O
										Arecaidine propargyl ester hydrobromide	CN1CCC=C(C1)C(=O)OCC#C
										Psora-4	C1=CC=C(C=C1)CCCCOC2=C3C=CC(=O)OC3=CC4=C2C=CO4
										gamma-Acetylinic GABA	C#CC(CCC(=O)O)N
										ATPA	CC(C)(C)C1=C(C(=O)NO1)CC(C(=O)O)N
										L-allylglycine	C=CCC(C(=O)O)N
										Ancitabine hydrochloride	C1=CN2C3C(C(C(O3)CO)O)OC2=NC1=N
										Astaxanthin	CC1=C(C(CC(=O)C1O)(C)C)C=CC(=CC=CC(=CC=CC=C(C)C=CC=C(C)C=CC2=C(C(C(=O)CC2(C)C)O)C)C)C	DB06543
										1,3-Dipropyl-8-p-sulfophenylxanthine	CCCN1C2=C(C(=O)N(C1=O)CCC)NC(=N2)C3=CC=C(C=C3)S(=O)(=O)O
										R(+)-Atenolol	CC(C)NCC(COC1=CC=C(C=C1)CC(=O)N)O	DB00335
										SB 200646 hydrochloride	CN1CCC2=C1C=CC(=C2)NC(=O)NC3=CN=CC=C3
										AB-MECA	CNC(=O)C1C(C(C(O1)N2C=NC3=C2N=CN=C3NCC4=CC=C(C=C4)N)O)O
										ARL 67156 trisodium salt	CCN(CC)C1=NC=NC2=C1N=CN2C3C(C(C(O3)COP(=O)(O)OP(=O)(C(P(=O)(O)O)(Br)Br)O)O)O
										Bromoenol lactone	C1CC(=CBr)OC(=O)C1C2=CC=CC3=CC=CC=C32
										H-9 dihydrochloride	C1=CC2=C(C=CN=C2)C(=C1)S(=O)(=O)NCCN
										N-(4-Amino-2-chlorophenyl)phthalimide	C1=CC=C2C(=C1)C(=O)N(C2=O)C3=C(C=C(C=C3)N)Cl
										Amsacrine hydrochloride	COC1=C(C=CC(=C1)NS(=O)(=O)C)NC2=C3C=CC=CC3=NC4=CC=CC=C42	DB00276
										2-Methylthioadenosine triphosphate tetrasodium	CSC1=NC2=C(C(=N1)N)N=CN2C3C(C(C(O3)COP(=O)(O)OP(=O)(O)OP(=O)(O)O)O)O
										S(-)-Atenolol	CC(C)NCC(COC1=CC=C(C=C1)CC(=O)N)O	DB00335
										D(-)-2-Amino-7-phosphonoheptanoic acid	C(CCC(C(=O)O)N)CCP(=O)(O)O
										Alloxazine	C1=CC=C2C(=C1)N=C3C(=N2)NC(=O)NC3=O
										Beclomethasone	CC1CC2C3CCC4=CC(=O)C=CC4(C3(C(CC2(C1(C(=O)CO)O)C)O)Cl)C
										Benzamide	C1=CC=C(C=C1)C(=O)N
										3-Bromo-7-nitroindazole	C1=CC2=C(NN=C2C(=C1)[N+](=O)[O-])Br	DB01997
										Bumetanide	CCCCNC1=C(C(=CC(=C1)C(=O)O)S(=O)(=O)N)OC2=CC=CC=C2	DB00887
										(±)-Baclofen	C1=CC(=CC=C1C(CC(=O)O)CN)Cl	DB00181
										BP 897	COC1=CC=CC=C1N2CCN(CC2)CCCCNC(=O)C3=CC4=CC=CC=C4C=C3
										Bupropion hydrochloride	CC(C(=O)C1=CC(=CC=C1)Cl)NC(C)(C)C	DB01156
										BU224 hydrochloride	C1CN=C(N1)C2=NC3=CC=CC=C3C=C2
										Ciprofibrate	CC(C)(C(=O)O)OC1=CC=C(C=C1)C2CC2(Cl)Cl	DB09064
										CGP-7930	CC(C)(C)C1=CC(=CC(=C1O)C(C)(C)C)CC(C)(C)CO
										Chlorprothixene hydrochloride	CN(C)CCC=C1C2=C(C=C(C=C2)Cl)SC3=CC=CC=C31	DB01239
										Betaine hydrochloride	C[N+](C)(C)CC(=O)O	DB06756
										SB 202190	C1=CC(=O)C=CC1=C2NC(=C(N2)C3=CC=NC=C3)C4=CC=C(C=C4)F
										Budesonide	CCCC1OC2CC3C4CCC5=CC(=O)C=CC5(C4C(CC3(C2(O1)C(=O)CO)C)O)C	DB01222
										(E)-5-(2-Bromovinyl)-2'-deoxyuridine	C1C(C(OC1N2C=C(C(=O)NC2=O)C=CBr)CO)O
										(-)-Bicuculline methbromide, 1(S), 9(R)	C[N+]1(CCC2=CC3=C(C=C2C1C4C5=C(C6=C(C=C5)OCO6)C(=O)O4)OCO3)C
										B-HT 933 dihydrochloride	CCN1CCC2=C(CC1)OC(=N2)N
										6-Chloromelatonin	CC(=O)NCCC1=CNC2=CC(=C(C=C21)OC)Cl
										CGP-13501	CC(C)(C)C1=CC(=CC(=C1O)C(C)(C)C)CC(C)(C)C=O
										Choline bromide	C[N+](C)(C)CCO
										O6-benzylguanine	C1=CC=C(C=C1)COC2=NC(=NC3=C2NC=N3)N	DB11919
										Betaine aldehyde chloride	C[N+](C)(C)CC=O	DB04401
										8-Bromo-cAMP sodium	C1C2C(C(C(O2)N3C4=C(C(=NC=N4)N)N=C3Br)O)OP(=O)(O1)O
										BRL 15572	C1CN(CCN1CC(C(C2=CC=CC=C2)C3=CC=CC=C3)O)C4=CC(=CC=C4)Cl
										(±)-Bay K 8644	CC1=C(C(C(=C(N1)C)[N+](=O)[O-])C2=CC=CC=C2C(F)(F)F)C(=O)OC
										(±)-Butaclamol hydrochloride	CC(C)(C)C1(CCN2CC3C4=CC=CC=C4CCC5=C3C(=CC=C5)C2C1)O
										Carmustine	C(CCl)NC(=O)N(CCCl)N=O	DB00262
										Ceramide	CCCCCCCCCCCCCC=CC(C(CO)NC(=O)C)O
										N-Bromoacetamide	CC(=O)NBr
										Benazoline oxalate	CC1=C(C2=CC=CC=C2S1)CC3=NCCN3	DB13614
										Betaxolol hydrochloride	CC(C)NCC(COC1=CC=C(C=C1)CCOCC2CC2)O	DB00195
										Benztropine mesylate	CN1C2CCC1CC(C2)OC(C3=CC=CC=C3)C4=CC=CC=C4	DB00245
										Chloroethylclonidine dihydrochloride	CN(CCCl)CC1=CC(=C(C(=C1)Cl)NC2=NCCN2)Cl
										Bromoacetylcholine bromide	C[N+](C)(C)CCOC(=O)CBr
										BRL 37344 sodium	CC(CC1=CC=C(C=C1)OCC(=O)O)NCC(C2=CC(=CC=C2)Cl)O
										PK 11195	CCC(C)N(C)C(=O)C1=CC2=CC=CC=C2C(=N1)C3=CC=CC=C3Cl
										L-Cycloserine	C1C(C(=O)NO1)N	DB00260
										CB 1954	C1CN1C2=C(C=C(C(=C2)C(=O)N)[N+](=O)[O-])[N+](=O)[O-]	DB04253
										(±)-Brompheniramine maleate	CN(C)CCC(C1=CC=C(C=C1)Br)C2=CC=CC=N2	DB00835
										BWB70C	CC(C=CC1=CC(=CC=C1)OC2=CC=C(C=C2)F)N(C(=O)N)O
										Benzamidine hydrochloride	C1=CC=C(C=C1)C(=N)N	DB03127
										Ro 20-1724	CCCCOC1=C(C=CC(=C1)CC2CNC(=O)N2)OC
										6-Fluoronorepinephrine hydrochloride	C1=C(C(=CC(=C1O)O)F)C(CN)O
										BMY 7378 dihydrochloride	COC1=CC=CC=C1N2CCN(CC2)CCN3C(=O)CC4(CCCC4)CC3=O
										BRL 54443 maleate	CN1CCC(CC1)C2=CNC3=C2C=C(C=C3)O
										Caffeic Acid	C1=CC(=C(C=C1C=CC(=O)O)O)O
										Carcinine dihydrochloride	C1=C(NC=N1)CCNC(=O)CCN
										Benzamil hydrochloride	C1=CC=C(C=C1)CN=C(N)NC(=O)C2=C(N=C(C(=N2)Cl)N)N
										Betamethasone	CC1CC2C3CCC4=CC(=O)C=CC4(C3(C(CC2(C1(C(=O)CO)O)C)O)F)C	DB00443
										Bestatin hydrochloride	CC(C)CC(C(=O)O)NC(=O)C(C(CC1=CC=CC=C1)N)O	DB03424
										BW 723C86	CC(CC1=CNC2=C1C=C(C=C2)OCC3=CC=CS3)N
										Cilostazol	C1CCC(CC1)N2C(=NN=N2)CCCCOC3=CC4=C(C=C3)NC(=O)CC4	DB01166
										(+)-Catechin Hydrate	C1C(C(OC2=CC(=CC(=C21)O)O)C3=CC(=C(C=C3)O)O)O	DB14086
										Corticosterone	CC12CCC(=O)C=C1CCC3C2C(CC4(C3CCC4C(=O)CO)C)O	DB04652
										Bepridil hydrochloride	CC(C)COCC(CN(CC1=CC=CC=C1)C2=CC=CC=C2)N3CCCC3	DB01244
										Buspirone hydrochloride	C1CCC2(C1)CC(=O)N(C(=O)C2)CCCCN3CCN(CC3)C4=NC=CC=N4	DB00490
										Bretylium tosylate	CC[N+](C)(C)CC1=CC=CC=C1Br	DB01158
										Benoxathian hydrochloride	COC1=C(C(=CC=C1)OC)OCCNCC2CSC3=CC=CC=C3O2
										BTCP hydrochloride	C1CCC(CC1)(C2=CC3=CC=CC=C3S2)N4CCCCC4
										Caffeine	CN1C=NC2=C1C(=O)N(C(=O)N2C)C	DB00201
										Chlorpropamide	CCCNC(=O)NS(=O)(=O)C1=CC=C(C=C1)Cl	DB00672
										Carboplatin	C1CC(C1)(C(=O)O)C(=O)O.[NH2-].[NH2-].[Pt+2]	DB00958
										DB13758	CCCCS(=N)(=O)CCC(C(=O)O)N	DB12870
										(+)-Brompheniramine maleate	CN(C)CCC(C1=CC=C(C=C1)Br)C2=CC=CC=N2	DB00835
										Phenoxybenzamine hydrochloride	CC(COC1=CC=CC=C1)N(CCCl)CC2=CC=CC=C2	DB00925
										N6-Benzyl-5'-N-ethylcarboxamidoadenosine	CCNC(=O)C1C(C(C(O1)N2C=NC3=C2N=CN=C3NCC4=CC=CC=C4)O)O
										Citicoline sodium	C[N+](C)(C)COP(=O)(O)OP(=O)(O)OCC1C(C(C(O1)N2C=CC(=NC2=O)N)O)O	DB12153
										Cyclophosphamide monohydrate	C1CNP(=O)(OC1)N(CCCl)CCCl	DB00531
										1-(4-Chlorobenzyl)-5-methoxy-2-methylindole-3-acetic acid	CC1=C(C2=C(N1CC3=CC=C(C=C3)Cl)C=CC(=C2)OC)CC(=O)O	DB00328
										Cortisone	CC12CCC(=O)C=C1CCC3C2C(=O)CC4(C3CCC4(C(=O)CO)O)C
										Cyclosporin A	CCC1C(=O)N(CC(=O)N(C(C(=O)NC(C(=O)N(C(C(=O)NC(C(=O)NC(C(=O)N(C(C(=O)N(C(C(=O)N(C(C(=O)N(C(C(=O)N1)C(C(C)CC=CC)O)C)C(C)C)C)CC(C)C)C)CC(C)C)C)C)C)CC(C)C)C)C(C)C)CC(C)C)C)C	DB00091
										Carbachol	C[N+](C)(C)CCOC(=O)N	DB00411
										Cephalexin hydrate	CC1=C(N2C(C(C2=O)NC(=O)C(C3=CC=CC=C3)N)SC1)C(=O)O	DB00567
										Cyproheptadine hydrochloride	CN1CCC(=C2C3=CC=CC=C3C=CC4=CC=CC=C42)CC1	DB00434
										CB34	CCCN(CCC)C(=O)CC1=C(N=C2N1C=C(C=C2Cl)Cl)C3=CC=C(C=C3)Cl
										Cantharidin	CC12C3CCC(C1(C(=O)OC2=O)C)O3	DB12328
										Chlorpromazine hydrochloride	CN(C)CCCN1C2=CC=CC=C2SC3=C1C=C(C=C3)Cl	DB00477
										Centrophenoxine hydrochloride	CN(C)CCOC(=O)COC1=CC=C(C=C1)Cl	DB13758
										1-(2-Chlorophenyl)-1-(4-chlorophenyl)-2,2-dichloroethane	C1=CC=C(C(=C1)C(C2=CC=C(C=C2)Cl)C(Cl)Cl)Cl	DB00648
										D-Cycloserine	C1C(C(=O)NO1)N	DB00260
										Chlorzoxazone	C1=CC2=C(C=C1Cl)NC(=O)O2	DB00356
										Chlorothiazide	C1=C2C(=CC(=C1Cl)S(=O)(=O)N)S(=O)(=O)N=CN2	DB00880
										SB 204741	CC1=NSC(=C1)NC(=O)NC2=CC3=C(C=C2)N(C=C3)C
										5'-(N-Cyclopropyl)carboxamidoadenosine	C1CC1NC(=O)C2C(C(C(O2)N3C=NC4=C3N=CN=C4N)O)O
										Cefaclor	C1C(=C(N2C(S1)C(C2=O)NC(=O)C(C3=CC=CC=C3)N)C(=O)O)Cl	DB00833
										Citalopram hydrobromide	CN(C)CCCC1(C2=C(CO1)C=C(C=C2)C#N)C3=CC=C(C=C3)F	DB00215
										Cefsulodin sodium salt hydrate	C1C(=C(N2C(S1)C(C2=O)NC(=O)C(C3=CC=CC=C3)S(=O)(=O)O)C(=O)O)C[N+]4=CC=C(C=C4)C(=O)N	DB13499
										L-Cysteinesulfinic Acid	C(C(C(=O)O)N)S(=O)O	DB02153
										(+)-Chlorpheniramine maleate	CN(C)CCC(C1=CC=C(C=C1)Cl)C2=CC=CC=N2	DB01114
										Ceftriaxone sodium	CN1C(=NC(=O)C(=O)N1)SCC2=C(N3C(C(C3=O)NC(=O)C(=NOC)C4=CSC(=N4)N)SC2)C(=O)O	DB01212
										Cefmetazole sodium	CN1C(=NN=N1)SCC2=C(N3C(C(C3=O)(NC(=O)CSCC#N)OC)SC2)C(=O)O	DB00274
										DL-Cycloserine	C1C(C(=O)NO1)N	DB00260
										beta-Chloro-L-alanine hydrochloride	C(C(C(=O)O)N)Cl
										Cortisone 21-acetate	CC(=O)OCC(=O)C1(CCC2C1(CC(=O)C3C2CCC4=CC(=O)CCC34C)C)O	DB01380
										9-cyclopentyladenine	C1CCC(C1)N2C=NC3=C2N=CN=C3N
										Cefazolin sodium	CC1=NN=C(S1)SCC2=C(N3C(C(C3=O)NC(=O)CN4C=NN=N4)SC2)C(=O)O	DB01327
										4-Chloromercuribenzoic acid	C1=CC(=CC=C1C(=O)O)[Hg]Cl
										Clozapine	CN1CCN(CC1)C2=C3C=CC=CC3=NC4=C(N2)C=C(C=C4)Cl	DB00363
										McN-A-343	C[N+](C)(C)CC#CCOC(=O)NC1=CC(=CC=C1)Cl
										Cefotaxime sodium	CC(=O)OCC1=C(N2C(C(C2=O)NC(=O)C(=NOC)C3=CSC(=N3)N)SC1)C(=O)O	DB00493
										Cephapirin sodium	CC(=O)OCC1=C(N2C(C(C2=O)NC(=O)CSC3=CC=NC=C3)SC1)C(=O)O	DB01139
										Pyrocatechol	C1=CC=C(C(=C1)O)O
										Cephalosporin C zinc salt	CC(=O)OCC1=C(N2C(C(C2=O)NC(=O)CCCC(C(=O)O)N)SC1)C(=O)O.[Zn+2]
										GR 113808	CN1C=C(C2=CC=CC=C21)C(=O)OCC3CCN(CC3)CCNS(=O)(=O)C
										Cephalothin sodium	CC(=O)OCC1=C(N2C(C(C2=O)NC(=O)CC3=CC=CS3)SC1)C(=O)O	DB00456
										(-)-Cotinine	CN1C(CCC1=O)C2=CN=CC=C2
										(±)-p-Chlorophenylalanine	C1=CC(=CC=C1CC(C(=O)O)N)Cl
										N-(2-[4-(4-Chlorophenyl)piperazin-1-yl]ethyl)-3-methoxybenzamide	COC1=CC=CC(=C1)C(=O)NCCN2CCN(CC2)C3=CC=C(C=C3)Cl
										Cilostamide	CN(C1CCCCC1)C(=O)CCCOC2=CC3=C(C=C2)NC(=O)C=C3
										Cephradine	CC1=C(N2C(C(C2=O)NC(=O)C(C3=CCC=CC3)N)SC1)C(=O)O	DB01333
										Carbamazepine	C1=CC=C2C(=C1)C=CC3=CC=CC=C3N2C(=O)N	DB00564
										Cimetidine	CC1=C(N=CN1)CSCCNC(=NC)NC#N	DB00501
										2-Chloroadenosine	C1=NC2=C(N1C3C(C(C(O3)CO)O)O)N=C(N=C2N)Cl
										CL 316,243	CC(CC1=CC2=C(C=C1)OC(O2)(C(=O)O)C(=O)O)NCC(C3=CC(=CC=C3)Cl)O
										Cystamine dihydrochloride	C(CSSCCN)N	DB00847
										Chelidamic acid	C1=C(NC(=CC1=O)C(=O)O)C(=O)O
										DSP-4 hydrochloride	CCN(CCCl)CC1=CC=CC=C1Br
										CPCCOEt	CCOC(=O)C12CC1C(=NO)C3=CC=CC=C3O2
										Cyproterone acetate	CC(=O)C1(CCC2C1(CCC3C2C=C(C4=CC(=O)C5CC5C34C)Cl)C)OC(=O)C	DB04839
										Captopril	CC(CS)C(=O)N1CCCC1C(=O)O	DB02032
										Cyclobenzaprine hydrochloride	CN(C)CCC=C1C2=CC=CC=C2C=CC3=CC=CC=C31	DB00924
										Bethanechol chloride	CC(C[N+](C)(C)C)OC(=O)N	DB01019
										N6-Cyclopentyladenosine	C1CCC(C1)NC2=NC=NC3=C2N=CN3C4C(C(C(O4)CO)O)O
										Cinoxacin	CCN1C2=CC3=C(C=C2C(=O)C(=N1)C(=O)O)OCO3	DB00827
										Colchicine	CC(=O)NC1CCC2=CC(=C(C(=C2C3=CC=C(C(=O)C=C13)OC)OC)OC)OC	DB01394
										DL-p-Chlorophenylalanine methyl ester hydrochloride	COC(=O)C(CC1=CC=C(C=C1)Cl)N
										CNS-1102	CCC1=CC(=CC=C1)N(C)C(=NC2=CC=CC3=CC=CC=C32)N
										Cinnarizine	C1CN(CCN1CC=CC2=CC=CC=C2)C(C3=CC=CC=C3)C4=CC=CC=C4	DB00568
										Cytosine-1-beta-D-arabinofuranoside hydrochloride	C1=CN(C(=O)N=C1N)C2C(C(C(O2)CO)O)O
										Carisoprodol	CCCC(C)(COC(=O)N)COC(=O)NC(C)C	DB00395
										L-Canavanine sulfate	C(CON=C(N)N)C(C(=O)O)N	DB01833
										Cyclothiazide	C1C2CC(C1C=C2)C3NC4=CC(=C(C=C4S(=O)(=O)N3)S(=O)(=O)N)Cl	DB00606
										(±)-CPP	C1CN(CC(N1)C(=O)O)CCCP(=O)(O)O
										CGS-15943	C1=COC(=C1)C2=NN3C(=N2)C4=C(C=CC(=C4)Cl)N=C3N
										Chloro-IB-MECA	CNC(=O)C1C(C(C(O1)N2C=NC3=C2N=C(N=C3NCC4=CC=C(C=C4)I)Cl)O)O
										Debrisoquin sulfate	C1CN(CC2=CC=CC=C21)C(=N)N.C1CN(CC2=CC=CC=C21)C(=N)N.OS(=O)(=O)O	DB04840
										Diltiazem hydrochloride	CC(=O)OC1C(SC2=CC=CC=C2N(C1=O)CCN(C)C)C3=CC=C(C=C3)OC	DB00343
										(S)-3,5-Dihydroxyphenylglycine	C1=C(C=C(C=C1O)O)C(C(=O)O)N	DB04228
										Phenytoin sodium	C1=CC=C(C=C1)C2(C(=O)NC(=O)N2)C3=CC=CC=C3	DB00252
										Daphnetin	C1=CC(=C(C2=C1C=CC(=O)O2)O)O
										N6-Cyclohexyladenosine	C1CCC(CC1)NC2=NC=NC3=C2N=CN3C4C(C(C(O4)CO)O)O	DB04690
										2-Chloro-2-deoxy-D-glucose	C(C1C(C(C(C(O1)O)Cl)O)O)O
										Dextromethorphan hydrobromide monohydrate	CN1CCC23CCCCC2C1CC4=C3C=C(C=C4)OC	DB00514
										Doxepin hydrochloride	CN(C)CCC=C1C2=CC=CC=C2COC3=CC=CC=C31	DB01142
										DM 235	CCC(=O)N1CCN(CC1)C(=O)C2=CC=CC=C2
										(S)-(+)-Camptothecin	CCC1(C2=C(COC1=O)C(=O)N3CC4=CC5=CC=CC=C5N=C4C3=C2)O	DB04690
										2-Cyclooctyl-2-hydroxyethylamine hydrochloride	C1CCCC(CCC1)C(CN)O
										1-(m-Chlorophenyl)-biguanide hydrochloride	C1=CC(=CC(=C1)Cl)N=C(N)N=C(N)N
										4'-Chloro-3-alpha-(diphenylmethoxy)tropane hydrochloride	CN1C2CCC1CC(C2)OC(C3=CC=CC=C3)C4=CC=C(C=C4)Cl
										DNQX	C1=C2C(=CC(=C1[N+](=O)[O-])[N+](=O)[O-])NC(=O)C(=O)N2	DB03759
										SB 203186	C1CCN(CC1)CCOC(=O)C2=CNC3=CC=CC=C32
										Doxylamine succinate	CC(C1=CC=CC=C1)(C2=CC=CC=N2)OCCN(C)C	DB00366
										S(-)-Pindolol	CC(C)NCC(COC1=CC=CC2=C1C=CN2)O	DB00960
										5,5-Dimethyl-1-pyrroline-N-oxide	CC1(CCC=[N+]1[O-])C
										5-Carboxamidotryptamine maleate	C1=CC2=C(C=C1C(=O)N)C(=CN2)CCN
										2-Chloroadenosine triphosphate tetrasodium	C1=NC2=C(N1C3C(C(C(O3)COP(=O)(O)OP(=O)(O)OP(=O)(O)O)O)O)N=C(N=C2N)Cl
										L-3,4-Dihydroxyphenylalanine methyl ester hydrochloride	COC(=O)C(CC1=CC(=C(C=C1)O)O)N	DB13313
										Dihydroergotamine methanesulfonate	CC1(C(=O)N2C(C(=O)N3CCCC3C2(O1)O)CC4=CC=CC=C4)NC(=O)C5CC6C(CC7=CNC8=CC=CC6=C78)N(C5)C	DB00320
										(-)-alpha-Methylnorepinephrine	CC(C(C1=CC(=C(C=C1)O)O)O)N	DB06707
										2',3'-dideoxycytidine	C1CC(OC1CO)N2C=CC(=NC2=O)N	DB00943
										(+)-cis-Dioxolane iodide	CC1OCC(O1)C[N+](C)(C)C
										7-Chlorokynurenic acid	C1=CC2=C(C=C1Cl)NC(=CC2=O)C(=O)O
										(-)-alpha-Methylnorepinephrine	CC(C(C1=CC(=C(C=C1)O)O)O)N	DB06707
										2',3'-dideoxycytidine	C1CC(OC1CO)N2C=CC(=NC2=O)N	DB00943
										(+)-cis-Dioxolane iodide	CC1OCC(O1)C[N+](C)(C)C
										7-Chlorokynurenic acid	C1=CC2=C(C=C1Cl)NC(=CC2=O)C(=O)O
										(+)-Cyclazocine	CC1C2CC3=C(C1(CCN2CC4CC4)C)C=C(C=C3)O
										1,4-Dideoxy-1,4-imino-D-arabinitol	C1C(C(C(N1)CO)O)O
										trans-Dehydroandrosterone	CC12CCC3C(C1CCC2=O)CC=C4C3(CCC(C4)O)C
										Dilazep hydrochloride	COC1=CC(=CC(=C1OC)OC)C(=O)OCCCN2CCCN(CC2)CCCOC(=O)C3=CC(=C(C(=C3)OC)OC)OC	DB13715
										Row 368
										beta-Estradiol	CC12CCC3C(C1CCC2O)CCC4=C3C=CC(=C4)O	DB00783
												144
