# Supplementary material for: Beta-2 adrenergic receptor agonism alters astrocyte phagocytic activity and has potential applications to psychiatric disease
Source: Research Square preprint supplement (doi:10.21203/rs.3.rs-2086278/v1), 2022-10-25
Supplement: Supplementary file 2 [file 252de5aadfe5369fb3b88326.xlsx]

## Sheet: CoxRegressSummary
	Patient Population	Countdown	Estimate	Lower 0.95	Upper 0.95	No Effect Line	Lower Limit	Upper Limit
	IPW	2	0.761	0.56348	1.00157	1	0.19752	0.24057
	Matched	1	0.977787	0.714548	1.33773	1	0.263239	0.359938
		3	1
		2	1
		1	1
		0	1
	Cohort	Cohort Count	Descriptor
	11	1295938	beta2 agonist expsoure while age <=18 > 6
	22	15504	schizophrenia diagnosis while age >= 18
	33	600	patients with pediatric exposure and young adult diagnosis
	44	14904	schizophrenia young adult diagnosis minus those with pediatric exposure
	55	31292	all inpatient visits with a diagnosis of schizophrenia or chilc concepts
	66	15	patients with pediatric exposure and subsequent SCHIZ inpatient visits
	77	1075	patients without pediatric exposure and subsequet SCHIZ inpatient visits

## Sheet: FullCovariateTable
	Before matching			After matching
	Target	Comparator		Target	Comparator
Characteristic	%	%	Std. diff	%	%	Std. diff
Age group
15 - 19	35.6	12.9	0.55	34.1	31.5	0.06
20 - 24	58.8	48.3	0.21	59.9	63.1	-0.07
25 - 29	5.6	32.3	-0.72	6	4.6	0.06
30 - 34		6.5			0.8
Gender: female	29.9	34.3	-0.09	30.5	27.7	0.06
Medical history: General
Acute respiratory disease	39	23.6	0.34	36.9	38.7	-0.04
Attention deficit hyperactivity disorder	24.8	12.8	0.31	22.6	22.6	0
Chronic liver disease	1.3	1	0.03	1.2	0.4	0.09
Chronic obstructive lung disease	0.7	0.9	-0.01	0.8	1.6	-0.07
Crohn's disease	0.2	0.5	-0.06	0.2	0.2	0
Dementia	0.4	0.9	-0.07	0.4	1	-0.07
Depressive disorder	54.3	45.9	0.17	53.5	48.9	0.09
Diabetes mellitus	2.6	3.9	-0.07	2.6	1.4	0.09
Gastroesophageal reflux disease	9.9	6.7	0.12	10	10	0
Gastrointestinal hemorrhage	1.7	2.2	-0.04	1.8	2.8	-0.07
Human immunodeficiency virus infection	0.4	0.5	-0.02	0.4
Hyperlipidemia	4.9	7.5	-0.11	5	4.2	0.04
Hypertensive disorder	10.1	9.8	0.01	9.8	7.4	0.09
Lesion of liver	0.2	0.3	-0.02	0.2	0.4	-0.04
Obesity	8.4	7.6	0.03	8.6	7.4	0.04
Osteoarthritis	2.8	3	-0.01	2.2	4	-0.1
Pneumonia	2.6	1.5	0.08	2.6	2.6	0
Psoriasis	1.3	0.5	0.09	1.4	0.2	0.13
Renal impairment	1.5	1.2	0.03	1.6	1.4	0.02
Rheumatoid arthritis	0.9	0.3	0.08	0.6	0.4	0.03
Ulcerative colitis	0.4	0.2	0.03	0.4
Urinary tract infectious disease	8.8	8.9	0	8.4	6.8	0.06
Viral hepatitis C	0.6	0.8	-0.03	0.4	0.4	0
Visual system disorder	14.9	12.3	0.08	15.4	15.2	0.01
Medical history: Cardiovascular disease
Atrial fibrillation	0.2	0.2	0	0.2
Cerebrovascular disease	0.7	0.8	0	0.8	1	-0.02
Coronary arteriosclerosis	0.7	0.3	0.06	0.8	0.4	0.05
Heart disease	12.3	8.6	0.12	12.2	11.6	0.02
Heart failure	1.3	0.4	0.09	1.4	0.2	0.13
Ischemic heart disease	0.4	0.4	-0.01	0.4	0.8	-0.05
Peripheral vascular disease	4.1	1.4	0.17	4.2	2.6	0.09
Pulmonary embolism		0.2			0.2
Venous thrombosis	0.7	0.5	0.03	0.8	1	-0.02
Medical history: Neoplasms
Hematologic neoplasm	0.2	0.3	-0.02	0.2	0.6	-0.06
Malignant lymphoma		0.1			0.2
Malignant neoplasm of anorectum		0
Malignant neoplastic disease	0.9	0.9	0.01	1	0.6	0.04
Malignant tumor of breast	0.2	0	0.05	0.2
Malignant tumor of colon		0
Malignant tumor of lung		0
Malignant tumor of urinary bladder		0
Primary malignant neoplasm of prostate		0
Medication use
Agents acting on the renin-angiotensin system	1.9	2.1	-0.02	1.6	0.8	0.07
Antibacterials for systemic use	54.5	39.1	0.31	54.1	49.7	0.09
Antidepressants	53.2	42.3	0.22	51.7	49.5	0.04
Antiepileptics	38.4	30.2	0.17	37.1	33.9	0.07
Antiinflammatory and antirheumatic products	18.5	14.9	0.09	18.4	15.4	0.08
Antineoplastic agents	2.6	1.4	0.09	2.6	1.4	0.09
Antipsoriatics	0.9	0.6	0.04	1	1	0
Antithrombotic agents	1.5	0.7	0.08	1.6	1	0.05
Beta blocking agents	7.6	5.2	0.1	7.6	7.4	0.01
Calcium channel blockers	0.9	1	-0.01	1	0.6	0.04
Diuretics	1.5	1.6	-0.01	1.4	0.8	0.06
Drugs for acid related disorders	10.3	7.3	0.1	10.2	8.2	0.07
Drugs for obstructive airway diseases	19.2	7.7	0.34	17.4	14.8	0.07
Drugs used in diabetes	2.1	3	-0.06	2	1.2	0.06
Immunosuppressants	0.7	0.5	0.04	0.8	0.2	0.09
Lipid modifying agents	0.9	1.7	-0.07	1	0.6	0.04
Opioids	13.6	10.3	0.1	13.2	13	0.01
Psycholeptics	70	62.1	0.17	68.5	66.3	0.05
Psychostimulants, agents used for adhd and nootropics	22.2	11.5	0.29	21.2	20.4	0.02

## Sheet: ConceptIDs_InPatientVisit
Id	Code	Name	Class	Standard Concept Caption	RC	DRC	Domain	Vocabulary	Ancestors
32760	OMOP4873971	Isolation in inpatient setting	Visit	Standard	0	0	Visit	Visit	0
9201	IP	Inpatient Visit	Visit	Standard	428319	6554917	Visit	Visit	0
8971	51	Inpatient Psychiatric Facility	Visit	Standard	0	0	Visit	CMS Place of Service	0
8717	21	Inpatient Hospital	Visit	Standard	6126598	6126598	Visit	CMS Place of Service	0
262	ERIP	Emergency Room and Inpatient Visit	Visit	Standard	186897	186897	Visit	Visit	0

## Sheet: ConceptIDs_beta2Agonists
Id	Code	Name	Class	Standard Concept Caption	RC	DRC	Domain	Vocabulary	Ancestors
1154343	435	Albuterol	Ingredient	Standard	240283	3755906	Drug	RxNorm	1
21603311	R03CC	Selective beta-2-adrenoreceptor agonists	ATC 4th	Classification	0	283995	Drug	ATC	0
21603312	R03CC02	salbutamol	ATC 5th	Classification	0	256935	Drug	ATC	1
1236744	10368	Terbutaline	Ingredient	Standard	26734	67529	Drug	RxNorm	1
21603313	R03CC03	terbutaline	ATC 5th	Classification	0	27060	Drug	ATC	1
40006997	370542	Albuterol Oral Tablet	Clinical Drug Form	Standard	0	15261	Drug	RxNorm	1
1154460	329499	Albuterol 2 MG	Clinical Drug Comp	Standard	0	12864	Drug	RxNorm	1
1154349	197316	Albuterol 2 MG Oral Tablet	Clinical Drug	Standard	12864	12864	Drug	RxNorm	1
1154458	315288	Albuterol 4 MG	Clinical Drug Comp	Standard	0	2676	Drug	RxNorm	1
1154350	197318	Albuterol 4 MG Oral Tablet	Clinical Drug	Standard	2390	2390	Drug	RxNorm	1
40104188	544499	Albuterol Oral Solution	Clinical Drug Form	Standard	0	1086	Drug	RxNorm	1
19085818	330648	Albuterol 0.4 MG/ML	Clinical Drug Comp	Standard	0	1086	Drug	RxNorm	1
1154654	755497	Albuterol 0.4 MG/ML Oral Solution	Clinical Drug	Standard	1086	1086	Drug	RxNorm	1
40085747	374040	Terbutaline Oral Tablet	Clinical Drug Form	Standard	0	403	Drug	RxNorm	1
40163449	857683	Terbutaline Sulfate 5 MG Oral Tablet	Clinical Drug	Standard	326	326	Drug	RxNorm	1
40163448	857682	Terbutaline Sulfate 5 MG	Clinical Drug Comp	Standard	0	326	Drug	RxNorm	1
40006962	370543	Albuterol Extended Release Oral Tablet	Clinical Drug Form	Standard	0	312	Drug	RxNorm	1
19072360	307781	Albuterol 4 MG Extended Release Oral Tablet	Clinical Drug	Standard	0	286	Drug	RxNorm	1
1154576	359144	12 HR Albuterol 4 MG Extended Release Oral Tablet	Quant Clinical Drug	Standard	286	286	Drug	RxNorm	1
1154577	359145	12 HR Albuterol 8 MG Extended Release Oral Tablet	Quant Clinical Drug	Standard	26	26	Drug	RxNorm	1
1154499	343177	Albuterol 8 MG	Clinical Drug Comp	Standard	0	26	Drug	RxNorm	1
1154457	313813	Albuterol 8 MG Extended Release Oral Tablet	Clinical Drug	Standard	0	26	Drug	RxNorm	1
44113846	OMOP1108477	Albuterol 4 MG Oral Tablet [Salbu] by Pro Doc Limitee	Marketed Product	Standard	0	0	Drug	RxNorm Extension	1
44111353	OMOP1105984	Albuterol 0.4 MG/ML Oral Solution [Phl-Salbutamol]	Branded Drug	Standard	0	0	Drug	RxNorm Extension	1
44111351	OMOP1105982	Albuterol 2 MG Oral Tablet [Nu-Salbutamol]	Branded Drug	Standard	0	0	Drug	RxNorm Extension	1
44111345	OMOP1105976	Albuterol 4 MG Oral Tablet [Novo-Salmol]	Branded Drug	Standard	0	0	Drug	RxNorm Extension	1
44111344	OMOP1105975	Albuterol 4 MG Oral Tablet [Nu-Salbutamol]	Branded Drug	Standard	0	0	Drug	RxNorm Extension	1
44101005	OMOP1095636	Albuterol 4 MG Oral Tablet [Nu-Salbutamol] by Nu-Pharm	Marketed Product	Standard	0	0	Drug	RxNorm Extension	1
44098512	OMOP1093143	Albuterol 2 MG Oral Tablet [Novo-Salmol]	Branded Drug	Standard	0	0	Drug	RxNorm Extension	1
44087994	OMOP1082625	Albuterol 0.4 MG/ML Oral Solution [Phl-Salbutamol] by Pharmel	Marketed Product	Standard	0	0	Drug	RxNorm Extension	1
44087992	OMOP1082623	Albuterol 2 MG Oral Tablet [Salbu] by Pro Doc Limitee	Marketed Product	Standard	0	0	Drug	RxNorm Extension	1
44087988	OMOP1082619	Albuterol 4 MG Oral Tablet [Apo-Salvent] by Apotex	Marketed Product	Standard	0	0	Drug	RxNorm Extension	1
44085586	OMOP1080217	Albuterol 4 MG Oral Tablet [Salbu]	Branded Drug	Standard	0	0	Drug	RxNorm Extension	1
44075128	OMOP1069759	Albuterol 0.4 MG/ML Oral Solution [Pms-Salbutamol] by Pharmascience	Marketed Product	Standard	0	0	Drug	RxNorm Extension	1
44075127	OMOP1069758	Albuterol 2 MG Oral Tablet [Novo-Salmol] by Novopharm	Marketed Product	Standard	0	0	Drug	RxNorm Extension	1
44075126	OMOP1069757	Albuterol 4 MG Oral Tablet [Novo-Salmol] by Novopharm	Marketed Product	Standard	0	0	Drug	RxNorm Extension	1
44072710	OMOP1067341	Albuterol 2 MG Oral Tablet [Apo-Salvent]	Branded Drug	Standard	0	0	Drug	RxNorm Extension	1
44072706	OMOP1067337	Albuterol 4 MG Oral Tablet [Apo-Salvent]	Branded Drug	Standard	0	0	Drug	RxNorm Extension	1
44049388	OMOP1044019	Albuterol 2 MG Oral Tablet [Nu-Salbutamol] by Nu-Pharm	Marketed Product	Standard	0	0	Drug	RxNorm Extension	1
44049382	OMOP1044013	Albuterol 4 MG Oral Tablet [Ventolin] by Glaxosmithkline	Marketed Product	Standard	0	0	Drug	RxNorm Extension	1
44046872	OMOP1041503	Albuterol 2 MG Oral Tablet [Salbu]	Branded Drug	Standard	0	0	Drug	RxNorm Extension	1
44036266	OMOP1030897	Albuterol 2 MG Oral Tablet [Apo-Salvent] by Apotex	Marketed Product	Standard	0	0	Drug	RxNorm Extension	1
44033851	OMOP1028482	Albuterol 0.4 MG/ML Oral Solution [Pms-Salbutamol]	Branded Drug	Standard	0	0	Drug	RxNorm Extension	1
43854513	OMOP935149	Terbutaline 7.5 MG Extended Release Oral Tablet [Bricanyl Duriles] by Astrazeneca	Marketed Product	Standard	0	0	Drug	RxNorm Extension	1
43692504	OMOP935148	Terbutaline 7.5 MG Extended Release Oral Tablet [Bricanyl Duriles]	Branded Drug	Standard	0	0	Drug	RxNorm Extension	1
43275360	OMOP562589	5 ML Albuterol 1 MG/ML Injectable Solution [Ventolin] Box of 5	Quant Branded Box	Standard	0	0	Drug	RxNorm Extension	1
43275359	OMOP562588	5 ML Albuterol 1 MG/ML Injection Box of 5	Quant Clinical Box	Standard	0	0	Drug	RxNorm Extension	1
43216225	OMOP487534	Albuterol 2 MG Oral Tablet [SALBUMOL] Box of 40 by Glaxosmithkline	Marketed Product	Standard	0	0	Drug	RxNorm Extension	1
43216224	OMOP487531	Albuterol 2 MG Oral Tablet Box of 40	Clinical Drug Box	Standard	0	0	Drug	RxNorm Extension	1
43215272	OMOP479036	bambuterol 20 MG Oral Tablet [OXEOL] Box of 30 by Astrazeneca	Marketed Product	Standard	0	0	Drug	RxNorm Extension	1
43215271	OMOP479035	bambuterol 20 MG Oral Tablet [OXEOL] Box of 30	Branded Drug Box	Standard	0	0	Drug	RxNorm Extension	1
43215082	OMOP477317	Terbutaline 5 MG Oral Tablet [Bricanyl SA] Box of 60 by Astrazeneca	Marketed Product	Standard	0	0	Drug	RxNorm Extension	1
43215081	OMOP477314	Terbutaline 5 MG Oral Tablet [Bricanyl SA] Box of 30 by Astrazeneca	Marketed Product	Standard	0	0	Drug	RxNorm Extension	1
43215080	OMOP477310	Terbutaline 5 MG Oral Tablet Box of 30	Clinical Drug Box	Standard	0	0	Drug	RxNorm Extension	1
43207398	OMOP508564	1 ML Albuterol 0.5 MG/ML Prefilled Syringe Box of 6	Quant Clinical Box	Standard	0	0	Drug	RxNorm Extension	1
43204399	OMOP479034	bambuterol 20 MG Oral Tablet [OXEOL]	Branded Drug	Standard	0	0	Drug	RxNorm Extension	1
43204225	OMOP477316	Terbutaline 5 MG Oral Tablet [Bricanyl SA] Box of 60	Branded Drug Box	Standard	0	0	Drug	RxNorm Extension	1
43185499	OMOP508568	1 ML Albuterol 0.5 MG/ML Prefilled Syringe [SALBUMOL] Box of 6 by Glaxosmithkline	Marketed Product	Standard	0	0	Drug	RxNorm Extension	1
43183361	OMOP487533	Albuterol 2 MG Oral Tablet [SALBUMOL] Box of 40	Branded Drug Box	Standard	0	0	Drug	RxNorm Extension	1
43182450	OMOP479039	bambuterol 10 MG Oral Tablet [OXEOL] Box of 30	Branded Drug Box	Standard	0	0	Drug	RxNorm Extension	1
43174655	OMOP508574	1 ML Albuterol 0.5 MG/ML Prefilled Syringe [Ventolin] Box of 6 by Glaxosmithkline	Marketed Product	Standard	0	0	Drug	RxNorm Extension	1
43174654	OMOP508571	1 ML Albuterol 0.5 MG/ML Prefilled Syringe [SALBUTAMOL RENAUDIN] Box of 100 by Renaudin	Marketed Product	Standard	0	0	Drug	RxNorm Extension	1
43174653	OMOP508569	1 ML Albuterol 0.5 MG/ML Prefilled Syringe [SALBUTAMOL RENAUDIN]	Quant Branded Drug	Standard	0	0	Drug	RxNorm Extension	1
43174652	OMOP508565	1 ML Albuterol 0.5 MG/ML Prefilled Syringe Box of 100	Quant Clinical Box	Standard	0	0	Drug	RxNorm Extension	1
43174630	OMOP508353	1 ML Terbutaline 0.5 MG/ML Prefilled Syringe [Bricanyl] Box of 10 by Astrazeneca	Marketed Product	Standard	0	0	Drug	RxNorm Extension	1
43174629	OMOP508351	1 ML Terbutaline 0.5 MG/ML Prefilled Syringe Box of 10	Quant Clinical Box	Standard	0	0	Drug	RxNorm Extension	1
43172446	OMOP487532	Albuterol 2 MG Oral Tablet [SALBUMOL]	Branded Drug	Standard	0	0	Drug	RxNorm Extension	1
43171447	OMOP479031	bambuterol 20 MG [OXEOL]	Branded Drug Comp	Standard	0	0	Drug	RxNorm Extension	1
43163651	OMOP508567	1 ML Albuterol 0.5 MG/ML Prefilled Syringe [SALBUMOL] Box of 6	Quant Branded Box	Standard	0	0	Drug	RxNorm Extension	1
43163626	OMOP508352	1 ML Terbutaline 0.5 MG/ML Prefilled Syringe [Bricanyl] Box of 10	Quant Branded Box	Standard	0	0	Drug	RxNorm Extension	1
43160548	OMOP479038	bambuterol 10 MG Oral Tablet [OXEOL]	Branded Drug	Standard	0	0	Drug	RxNorm Extension	1
43160547	OMOP479037	bambuterol 10 MG [OXEOL]	Branded Drug Comp	Standard	0	0	Drug	RxNorm Extension	1
43160357	OMOP477313	Terbutaline 5 MG Oral Tablet [Bricanyl SA] Box of 30	Branded Drug Box	Standard	0	0	Drug	RxNorm Extension	1
43152533	OMOP508572	1 ML Albuterol 0.5 MG/ML Prefilled Syringe [Ventolin] Box of 6	Quant Branded Box	Standard	0	0	Drug	RxNorm Extension	1
43152532	OMOP508570	1 ML Albuterol 0.5 MG/ML Prefilled Syringe [SALBUTAMOL RENAUDIN] Box of 100	Quant Branded Box	Standard	0	0	Drug	RxNorm Extension	1
43141435	OMOP508566	1 ML Albuterol 0.5 MG/ML Prefilled Syringe [SALBUMOL]	Quant Branded Drug	Standard	0	0	Drug	RxNorm Extension	1
43138413	OMOP479040	bambuterol 10 MG Oral Tablet [OXEOL] Box of 30 by Astrazeneca	Marketed Product	Standard	0	0	Drug	RxNorm Extension	1
43138412	OMOP479030	bambuterol Oral Tablet [OXEOL]	Branded Drug Form	Standard	0	0	Drug	RxNorm Extension	1
43138190	OMOP477312	Terbutaline 5 MG Oral Tablet [Bricanyl SA]	Branded Drug	Standard	0	0	Drug	RxNorm Extension	1
43138189	OMOP477311	Terbutaline 5 MG Oral Tablet Box of 60	Clinical Drug Box	Standard	0	0	Drug	RxNorm Extension	1
43038851	OMOP4853891	1 ML Albuterol 0.5 MG/ML Prefilled Syringe Box of 100 by Renaudin	Marketed Product	Standard	0	0	Drug	RxNorm Extension	1
43034852	OMOP4849897	Terbutaline 5 MG Oral Tablet [Bricanyl] Box of 60 by Astrazeneca	Marketed Product	Standard	0	0	Drug	RxNorm Extension	1
43034851	OMOP4849896	Terbutaline 5 MG Oral Tablet [Bricanyl] Box of 60	Branded Drug Box	Standard	0	0	Drug	RxNorm Extension	1
42968753	OMOP4695194	bambuterol Oral Tablet [BAMTEROL]	Branded Drug Form	Standard	0	0	Drug	RxNorm Extension	1
42968752	OMOP4695193	bambuterol Oral Tablet [BAMBI]	Branded Drug Form	Standard	0	0	Drug	RxNorm Extension	1
42968751	OMOP4695192	bambuterol Oral Tablet [ASTEROL]	Branded Drug Form	Standard	0	0	Drug	RxNorm Extension	1
42968750	OMOP4695191	bambuterol Oral Tablet [A-TEROL]	Branded Drug Form	Standard	0	0	Drug	RxNorm Extension	1
42968749	OMOP4695190	bambuterol Oral Tablet [BAMBUTOL]	Branded Drug Form	Standard	0	0	Drug	RxNorm Extension	1
42968748	OMOP4695189	bambuterol 10 MG [BAMTEROL]	Branded Drug Comp	Standard	0	0	Drug	RxNorm Extension	1
42968747	OMOP4695188	bambuterol 10 MG [BAMBI]	Branded Drug Comp	Standard	0	0	Drug	RxNorm Extension	1
42968746	OMOP4695187	bambuterol 10 MG [ASTEROL]	Branded Drug Comp	Standard	0	0	Drug	RxNorm Extension	1
42968745	OMOP4695186	bambuterol 10 MG [A-TEROL]	Branded Drug Comp	Standard	0	0	Drug	RxNorm Extension	1
42968744	OMOP4695185	bambuterol 10 MG [BAMBUTOL]	Branded Drug Comp	Standard	0	0	Drug	RxNorm Extension	1
42968743	OMOP4695184	bambuterol 10 MG Oral Tablet [BAMTEROL]	Branded Drug	Standard	0	0	Drug	RxNorm Extension	1
42968742	OMOP4695183	bambuterol 10 MG Oral Tablet [BAMBI]	Branded Drug	Standard	0	0	Drug	RxNorm Extension	1
42968741	OMOP4695182	bambuterol 10 MG Oral Tablet [ASTEROL]	Branded Drug	Standard	0	0	Drug	RxNorm Extension	1
42968740	OMOP4695181	bambuterol 10 MG Oral Tablet [A-TEROL]	Branded Drug	Standard	0	0	Drug	RxNorm Extension	1
42968739	OMOP4695180	bambuterol 10 MG Oral Tablet [BAMBUTOL]	Branded Drug	Standard	0	0	Drug	RxNorm Extension	1
42931127	OMOP4657892	Albuterol 2 MG Oral Tablet [SALBUTAMOL SHINIL]	Branded Drug	Standard	0	0	Drug	RxNorm Extension	1
42931125	OMOP4657890	Albuterol 8 MG Extended Release Oral Capsule [SALBUTRON]	Branded Drug	Standard	0	0	Drug	RxNorm Extension	1
42931118	OMOP4657883	Albuterol 4 MG Extended Release Oral Capsule [SALBUTRON]	Branded Drug	Standard	0	0	Drug	RxNorm Extension	1
42931117	OMOP4657882	Albuterol 4 MG Oral Tablet [SALBUTAMOL BUKWANG]	Branded Drug	Standard	0	0	Drug	RxNorm Extension	1
41439317	OMOP2637279	300 ML Terbutaline 0.3 MG/ML Oral Solution [Bricanyl] Box of 1	Quant Branded Box	Standard	0	0	Drug	RxNorm Extension	1
41439286	OMOP2637248	300 ML Terbutaline 0.3 MG/ML Oral Solution Box of 1	Quant Clinical Box	Standard	0	0	Drug	RxNorm Extension	1
41425038	OMOP2623000	100 ML Terbutaline 0.3 MG/ML Oral Solution Box of 1	Quant Clinical Box	Standard	0	0	Drug	RxNorm Extension	1
41419370	OMOP2617332	100 ML Terbutaline 0.3 MG/ML Oral Solution [Bricanyl] Box of 1	Quant Branded Box	Standard	0	0	Drug	RxNorm Extension	1
41324855	OMOP2522817	bambuterol 10 MG Oral Tablet [Bambec] Box of 20 by Emra-Med	Marketed Product	Standard	0	0	Drug	RxNorm Extension	1
41324854	OMOP2522816	bambuterol 10 MG Oral Tablet [Bambec] Box of 50 by Opti	Marketed Product	Standard	0	0	Drug	RxNorm Extension	1
41324853	OMOP2522815	bambuterol 10 MG Oral Tablet [Bambec] Box of 50 by Orifarm Leverkus	Marketed Product	Standard	0	0	Drug	RxNorm Extension	1
41324852	OMOP2522814	bambuterol 10 MG Oral Tablet [Bambec] Box of 100 by Kohlpharma	Marketed Product	Standard	0	0	Drug	RxNorm Extension	1
41320010	OMOP2517972	Albuterol 4 MG Oral Tablet [Salbulair] Box of 50 by 3M	Marketed Product	Standard	0	0	Drug	RxNorm Extension	1
41308371	OMOP2506333	Albuterol 8 MG Extended Release Oral Tablet [Volmac] Box of 100	Branded Drug Box	Standard	0	0	Drug	RxNorm Extension	1
41308370	OMOP2506332	Albuterol 8 MG Extended Release Oral Capsule [Apsomol] Box of 50	Branded Drug Box	Standard	0	0	Drug	RxNorm Extension	1
41308362	OMOP2506324	Albuterol 2 MG Oral Tablet [Salbulair] Box of 50	Branded Drug Box	Standard	0	0	Drug	RxNorm Extension	1
41305798	OMOP2503760	bambuterol 10 MG Oral Tablet Box of 50	Clinical Drug Box	Standard	0	0	Drug	RxNorm Extension	1
41302097	OMOP2500059	Albuterol 4 MG Oral Tablet Box of 50	Clinical Drug Box	Standard	0	0	Drug	RxNorm Extension	1
41302095	OMOP2500057	Albuterol 8 MG Extended Release Oral Tablet Box of 20	Clinical Drug Box	Standard	0	0	Drug	RxNorm Extension	1
41302094	OMOP2500056	Albuterol 8 MG Extended Release Oral Tablet Box of 800	Clinical Drug Box	Standard	0	0	Drug	RxNorm Extension	1
41293498	OMOP2491460	bambuterol 10 MG Oral Tablet [Bambec] Box of 100 by Eurim-Pharm	Marketed Product	Standard	0	0	Drug	RxNorm Extension	1
41288603	OMOP2486565	Albuterol 8 MG Extended Release Oral Tablet Box of 100 by Dexcel-Pharma	Marketed Product	Standard	0	0	Drug	RxNorm Extension	1
41277207	OMOP2475169	Albuterol 4 MG Oral Tablet [Salmundin]	Branded Drug	Standard	0	0	Drug	RxNorm Extension	1
41277205	OMOP2475167	Albuterol 8 MG Extended Release Oral Tablet [Sultanol] Box of 50	Branded Drug Box	Standard	0	0	Drug	RxNorm Extension	1
41277190	OMOP2475152	Albuterol 2 MG Oral Tablet [Sultanol] Box of 5000	Branded Drug Box	Standard	0	0	Drug	RxNorm Extension	1
41270999	OMOP2468961	Albuterol 8 MG Extended Release Oral Tablet Box of 50	Clinical Drug Box	Standard	0	0	Drug	RxNorm Extension	1
41270998	OMOP2468960	Albuterol 8 MG Extended Release Oral Tablet Box of 500	Clinical Drug Box	Standard	0	0	Drug	RxNorm Extension	1
41270995	OMOP2468957	Albuterol 2 MG Oral Tablet Box of 800	Clinical Drug Box	Standard	0	0	Drug	RxNorm Extension	1
41257558	OMOP2455520	Albuterol 4 MG Oral Tablet [Salmundin] Box of 100 by Mundipharma	Marketed Product	Standard	0	0	Drug	RxNorm Extension	1
41257555	OMOP2455517	Albuterol 8 MG Extended Release Oral Capsule [Salbuhexal] Box of 100 by Novartis	Marketed Product	Standard	0	0	Drug	RxNorm Extension	1
41255349	OMOP2453311	bambuterol 10 MG Oral Tablet [Bambec] Box of 100	Branded Drug Box	Standard	0	0	Drug	RxNorm Extension	1
41246327	OMOP2444289	Albuterol 4 MG Oral Tablet [Sultanol] Box of 2500	Branded Drug Box	Standard	0	0	Drug	RxNorm Extension	1
41246326	OMOP2444288	Albuterol 4 MG Oral Tablet [Volmac]	Branded Drug	Standard	0	0	Drug	RxNorm Extension	1
41246323	OMOP2444285	Albuterol 8 MG Extended Release Oral Tablet [Sultanol] Box of 100	Branded Drug Box	Standard	0	0	Drug	RxNorm Extension	1
41246321	OMOP2444283	Albuterol 8 MG Extended Release Oral Tablet [Volmac] Box of 20	Branded Drug Box	Standard	0	0	Drug	RxNorm Extension	1
41246320	OMOP2444282	Albuterol 8 MG Extended Release Oral Capsule [Salbuhexal] Box of 20	Branded Drug Box	Standard	0	0	Drug	RxNorm Extension	1
41240136	OMOP2438098	Albuterol 2 MG Oral Tablet Box of 400	Clinical Drug Box	Standard	0	0	Drug	RxNorm Extension	1
41231568	OMOP2429530	bambuterol 10 MG Oral Tablet [Bambec] Box of 20 by Eurim-Pharm	Marketed Product	Standard	0	0	Drug	RxNorm Extension	1
41231567	OMOP2429529	bambuterol 10 MG Oral Tablet [Bambec] Box of 100 by Astrazeneca	Marketed Product	Standard	0	0	Drug	RxNorm Extension	1
41231566	OMOP2429528	bambuterol 10 MG Oral Tablet [Bambec] Box of 100 by Opti	Marketed Product	Standard	0	0	Drug	RxNorm Extension	1
41226705	OMOP2424667	Albuterol 4 MG Oral Tablet [Salbulair] Box of 100 by 3M	Marketed Product	Standard	0	0	Drug	RxNorm Extension	1
41215325	OMOP2413287	Albuterol 4 MG Oral Tablet [Sultanol] Box of 5000	Branded Drug Box	Standard	0	0	Drug	RxNorm Extension	1
41215324	OMOP2413286	Albuterol 4 MG Oral Tablet [Loftan] Box of 20	Branded Drug Box	Standard	0	0	Drug	RxNorm Extension	1
41215323	OMOP2413285	Albuterol 4 MG Oral Tablet [Volmac] Box of 50	Branded Drug Box	Standard	0	0	Drug	RxNorm Extension	1
41215320	OMOP2413282	Albuterol 8 MG Extended Release Oral Tablet [Volmac] Box of 400	Branded Drug Box	Standard	0	0	Drug	RxNorm Extension	1
41209183	OMOP2407145	Albuterol 4 MG Oral Tablet Box of 1000	Clinical Drug Box	Standard	0	0	Drug	RxNorm Extension	1
41200525	OMOP2398487	bambuterol 10 MG Oral Tablet [Bambec] Box of 20 by Mtk	Marketed Product	Standard	0	0	Drug	RxNorm Extension	1
41200524	OMOP2398486	bambuterol 10 MG Oral Tablet [Bambec] Box of 50 by Mtk	Marketed Product	Standard	0	0	Drug	RxNorm Extension	1
41195639	OMOP2393601	Albuterol 2 MG Oral Tablet [Salbulair] Box of 20 by 3M	Marketed Product	Standard	0	0	Drug	RxNorm Extension	1
41184004	OMOP2381966	Albuterol 4 MG Oral Tablet [Sultanol] Box of 500	Branded Drug Box	Standard	0	0	Drug	RxNorm Extension	1
41184003	OMOP2381965	Albuterol 4 MG Oral Tablet [Loftan]	Branded Drug	Standard	0	0	Drug	RxNorm Extension	1
41184002	OMOP2381964	Albuterol 8 MG Extended Release Oral Tablet [Loftan] Box of 50	Branded Drug Box	Standard	0	0	Drug	RxNorm Extension	1
41183999	OMOP2381961	Albuterol 8 MG Extended Release Oral Tablet [Sultanol] Box of 500	Branded Drug Box	Standard	0	0	Drug	RxNorm Extension	1
41183997	OMOP2381959	Albuterol 8 MG Extended Release Oral Capsule [Apsomol] Box of 20	Branded Drug Box	Standard	0	0	Drug	RxNorm Extension	1
41183996	OMOP2381958	Albuterol 8 MG Extended Release Oral Capsule [Salbuhexal] Box of 100	Branded Drug Box	Standard	0	0	Drug	RxNorm Extension	1
41183990	OMOP2381952	Albuterol 2 MG Oral Tablet [Sultanol] Box of 500	Branded Drug Box	Standard	0	0	Drug	RxNorm Extension	1
41183989	OMOP2381951	Albuterol 2 MG Oral Tablet [Sultanol] Box of 800	Branded Drug Box	Standard	0	0	Drug	RxNorm Extension	1
41177652	OMOP2375614	Albuterol 4 MG Oral Tablet Box of 2500	Clinical Drug Box	Standard	0	0	Drug	RxNorm Extension	1
41177651	OMOP2375613	Albuterol 8 MG Extended Release Oral Tablet Box of 2500	Clinical Drug Box	Standard	0	0	Drug	RxNorm Extension	1
41177650	OMOP2375612	Albuterol 8 MG Extended Release Oral Tablet Box of 5000	Clinical Drug Box	Standard	0	0	Drug	RxNorm Extension	1
41177644	OMOP2375606	Albuterol 2 MG Oral Tablet Box of 2400	Clinical Drug Box	Standard	0	0	Drug	RxNorm Extension	1
41169135	OMOP2367097	bambuterol 10 MG Oral Tablet [Bambec] Box of 20 by Kohlpharma	Marketed Product	Standard	0	0	Drug	RxNorm Extension	1
41169134	OMOP2367096	bambuterol 10 MG Oral Tablet [Bambec] Box of 100 by Beragena	Marketed Product	Standard	0	0	Drug	RxNorm Extension	1
41164323	OMOP2362285	Albuterol 4 MG Oral Tablet [Salmundin] Box of 50 by Mundipharma	Marketed Product	Standard	0	0	Drug	RxNorm Extension	1
41152973	OMOP2350935	Albuterol 4 MG Oral Tablet [Sultanol]	Branded Drug	Standard	0	0	Drug	RxNorm Extension	1
41152972	OMOP2350934	Albuterol 4 MG Oral Tablet [Loftan] Box of 50	Branded Drug Box	Standard	0	0	Drug	RxNorm Extension	1
41152971	OMOP2350933	Albuterol 4 MG Oral Tablet [Volmac] Box of 400	Branded Drug Box	Standard	0	0	Drug	RxNorm Extension	1
41152968	OMOP2350930	Albuterol 8 MG Extended Release Oral Capsule [Salbuhexal] Box of 50	Branded Drug Box	Standard	0	0	Drug	RxNorm Extension	1
41152313	OMOP2350275	Terbutaline 5 MG Oral Tablet [Bricanyl] Box of 1000	Branded Drug Box	Standard	0	0	Drug	RxNorm Extension	1
41146734	OMOP2344696	Albuterol 4 MG Oral Tablet Box of 400	Clinical Drug Box	Standard	0	0	Drug	RxNorm Extension	1
41146733	OMOP2344695	Albuterol 4 MG Oral Tablet Box of 5000	Clinical Drug Box	Standard	0	0	Drug	RxNorm Extension	1
41146455	OMOP2344417	Terbutaline 5 MG Oral Tablet Box of 50	Clinical Drug Box	Standard	0	0	Drug	RxNorm Extension	1
41137970	OMOP2335932	bambuterol 10 MG Oral Tablet [Bambec] Box of 100 by Emra-Med	Marketed Product	Standard	0	0	Drug	RxNorm Extension	1
41137969	OMOP2335931	bambuterol 10 MG Oral Tablet [Bambec] Box of 100 by Orifarm Leverkus	Marketed Product	Standard	0	0	Drug	RxNorm Extension	1
41132970	OMOP2330932	Albuterol 8 MG Extended Release Oral Capsule [Salbupp] Box of 50 by DermaPharm	Marketed Product	Standard	0	0	Drug	RxNorm Extension	1
41130743	OMOP2328705	bambuterol 10 MG Oral Tablet [Bambec] Box of 20	Branded Drug Box	Standard	0	0	Drug	RxNorm Extension	1
41121443	OMOP2319405	Albuterol 4 MG Oral Tablet [Salbulair] Box of 20	Branded Drug Box	Standard	0	0	Drug	RxNorm Extension	1
41121442	OMOP2319404	Albuterol 8 MG Extended Release Oral Tablet [Loftan]	Branded Drug	Standard	0	0	Drug	RxNorm Extension	1
41121439	OMOP2319401	Albuterol 8 MG Extended Release Oral Tablet [Salmundin] Box of 100	Branded Drug Box	Standard	0	0	Drug	RxNorm Extension	1
41121438	OMOP2319400	Albuterol 8 MG Extended Release Oral Tablet [Sultanol] Box of 20	Branded Drug Box	Standard	0	0	Drug	RxNorm Extension	1
41121436	OMOP2319398	Albuterol 8 MG Extended Release Oral Tablet [Sultanol] Box of 800	Branded Drug Box	Standard	0	0	Drug	RxNorm Extension	1
41121434	OMOP2319396	Albuterol 8 MG Extended Release Oral Capsule [Salbuhexal]	Branded Drug	Standard	0	0	Drug	RxNorm Extension	1
41121433	OMOP2319395	Albuterol 8 MG Extended Release Oral Capsule [Salbupp]	Branded Drug	Standard	0	0	Drug	RxNorm Extension	1
41121423	OMOP2319385	Albuterol 2 MG Oral Tablet [Sultanol] Box of 2500	Branded Drug Box	Standard	0	0	Drug	RxNorm Extension	1
41115160	OMOP2313122	Albuterol 8 MG Extended Release Oral Tablet Box of 100	Clinical Drug Box	Standard	0	0	Drug	RxNorm Extension	1
41101642	OMOP2299604	Albuterol 8 MG Extended Release Oral Tablet [Volmac] Box of 20 by Dexcel-Pharma	Marketed Product	Standard	0	0	Drug	RxNorm Extension	1
41090223	OMOP2288185	Albuterol 8 MG Extended Release Oral Tablet [Loftan] Box of 20	Branded Drug Box	Standard	0	0	Drug	RxNorm Extension	1
41090221	OMOP2288183	Albuterol 8 MG Extended Release Oral Tablet [Salmundin] Box of 20	Branded Drug Box	Standard	0	0	Drug	RxNorm Extension	1
41090220	OMOP2288182	Albuterol 8 MG Extended Release Oral Tablet [Salmundin] Box of 50	Branded Drug Box	Standard	0	0	Drug	RxNorm Extension	1
41090219	OMOP2288181	Albuterol 8 MG Extended Release Oral Capsule [Salbupp] Box of 50	Branded Drug Box	Standard	0	0	Drug	RxNorm Extension	1
41090211	OMOP2288173	Albuterol 2 MG Oral Tablet [Salbulair] Box of 20	Branded Drug Box	Standard	0	0	Drug	RxNorm Extension	1
41083936	OMOP2281898	Albuterol 8 MG Extended Release Oral Tablet Box of 2400	Clinical Drug Box	Standard	0	0	Drug	RxNorm Extension	1
41083935	OMOP2281897	Albuterol 8 MG Extended Release Oral Capsule Box of 50	Clinical Drug Box	Standard	0	0	Drug	RxNorm Extension	1
41083933	OMOP2281895	Albuterol 2 MG Oral Tablet Box of 1000	Clinical Drug Box	Standard	0	0	Drug	RxNorm Extension	1
41075108	OMOP2273070	bambuterol 10 MG Oral Tablet [Bambec] Box of 20 by Opti	Marketed Product	Standard	0	0	Drug	RxNorm Extension	1
41075107	OMOP2273069	bambuterol 10 MG Oral Tablet [Bambec] Box of 50 by Aca Mueller	Marketed Product	Standard	0	0	Drug	RxNorm Extension	1
41075106	OMOP2273068	bambuterol 10 MG Oral Tablet [Bambec] Box of 50 by Astrazeneca	Marketed Product	Standard	0	0	Drug	RxNorm Extension	1
41075105	OMOP2273067	bambuterol 10 MG Oral Tablet [Bambec] Box of 50 by Mevita	Marketed Product	Standard	0	0	Drug	RxNorm Extension	1
41075104	OMOP2273066	bambuterol 10 MG Oral Tablet [Bambec] Box of 100 by Mtk	Marketed Product	Standard	0	0	Drug	RxNorm Extension	1
41070191	OMOP2268153	Albuterol 4 MG Oral Tablet [Salbulair] Box of 20 by 3M	Marketed Product	Standard	0	0	Drug	RxNorm Extension	1
41070190	OMOP2268152	Albuterol 8 MG Extended Release Oral Capsule [Apsomol] Box of 50 by Farmasan	Marketed Product	Standard	0	0	Drug	RxNorm Extension	1
41070189	OMOP2268151	Albuterol 8 MG Extended Release Oral Capsule [Salbupp] Box of 100 by DermaPharm	Marketed Product	Standard	0	0	Drug	RxNorm Extension	1
41067896	OMOP2265858	bambuterol 10 MG Oral Tablet [Bambec] Box of 50	Branded Drug Box	Standard	0	0	Drug	RxNorm Extension	1
41058637	OMOP2256599	Albuterol 4 MG Oral Tablet [Salbulair] Box of 100	Branded Drug Box	Standard	0	0	Drug	RxNorm Extension	1
41058636	OMOP2256598	Albuterol 4 MG Oral Tablet [Sultanol] Box of 20	Branded Drug Box	Standard	0	0	Drug	RxNorm Extension	1
41058635	OMOP2256597	Albuterol 4 MG Oral Tablet [Loftan] Box of 100	Branded Drug Box	Standard	0	0	Drug	RxNorm Extension	1
41058634	OMOP2256596	Albuterol 4 MG Oral Tablet [Volmac] Box of 20	Branded Drug Box	Standard	0	0	Drug	RxNorm Extension	1
41058632	OMOP2256594	Albuterol 8 MG Extended Release Oral Tablet [Sultanol] Box of 2500	Branded Drug Box	Standard	0	0	Drug	RxNorm Extension	1
41058630	OMOP2256592	Albuterol 8 MG Extended Release Oral Capsule [Apsomol] Box of 100	Branded Drug Box	Standard	0	0	Drug	RxNorm Extension	1
41058629	OMOP2256591	Albuterol 8 MG Extended Release Oral Capsule [Salbupp] Box of 100	Branded Drug Box	Standard	0	0	Drug	RxNorm Extension	1
41058619	OMOP2256581	Albuterol 2 MG Oral Tablet [Sultanol] Box of 100	Branded Drug Box	Standard	0	0	Drug	RxNorm Extension	1
41056123	OMOP2254085	bambuterol 10 MG Oral Tablet Box of 100	Clinical Drug Box	Standard	0	0	Drug	RxNorm Extension	1
41052332	OMOP2250294	Albuterol 8 MG Extended Release Oral Capsule Box of 100	Clinical Drug Box	Standard	0	0	Drug	RxNorm Extension	1
41052329	OMOP2250291	Albuterol 2 MG Oral Tablet Box of 5000	Clinical Drug Box	Standard	0	0	Drug	RxNorm Extension	1
41043735	OMOP2241697	bambuterol 10 MG Oral Tablet [Bambec] Box of 50 by Eurim-Pharm	Marketed Product	Standard	0	0	Drug	RxNorm Extension	1
41038895	OMOP2236857	Albuterol 8 MG Extended Release Oral Tablet [Salmundin] Box of 100 by Mundipharma	Marketed Product	Standard	0	0	Drug	RxNorm Extension	1
41038894	OMOP2236856	Albuterol 8 MG Extended Release Oral Tablet [Volmac] Box of 100 by Dexcel-Pharma	Marketed Product	Standard	0	0	Drug	RxNorm Extension	1
41036662	OMOP2234624	bambuterol 10 MG Oral Tablet [Bambec] Box of 150	Branded Drug Box	Standard	0	0	Drug	RxNorm Extension	1
41027461	OMOP2225423	Albuterol 4 MG Oral Tablet [Sultanol] Box of 50	Branded Drug Box	Standard	0	0	Drug	RxNorm Extension	1
41021136	OMOP2219098	Albuterol 4 MG Oral Tablet Box of 20	Clinical Drug Box	Standard	0	0	Drug	RxNorm Extension	1
41021133	OMOP2219095	Albuterol 8 MG Extended Release Oral Capsule Box of 20	Clinical Drug Box	Standard	0	0	Drug	RxNorm Extension	1
41021128	OMOP2219090	Albuterol 2 MG Oral Tablet Box of 20	Clinical Drug Box	Standard	0	0	Drug	RxNorm Extension	1
41020850	OMOP2218812	Terbutaline 5 MG Oral Tablet Box of 1000	Clinical Drug Box	Standard	0	0	Drug	RxNorm Extension	1
41007830	OMOP2205792	Albuterol 8 MG Extended Release Oral Tablet Box of 50 by Dexcel-Pharma	Marketed Product	Standard	0	0	Drug	RxNorm Extension	1
41007420	OMOP2205382	Terbutaline 5 MG Oral Tablet [Bricanyl] Box of 50 by Astrazeneca	Marketed Product	Standard	0	0	Drug	RxNorm Extension	1
40996442	OMOP2194404	Albuterol 4 MG Oral Tablet [Salbulair] Box of 50	Branded Drug Box	Standard	0	0	Drug	RxNorm Extension	1
40996435	OMOP2194397	Albuterol 2 MG Oral Tablet [Salbulair] Box of 100	Branded Drug Box	Standard	0	0	Drug	RxNorm Extension	1
40990146	OMOP2188108	Albuterol 2 MG Oral Tablet Box of 50	Clinical Drug Box	Standard	0	0	Drug	RxNorm Extension	1
40981328	OMOP2179290	bambuterol 10 MG Oral Tablet [Bambec] Box of 50 by Beragena	Marketed Product	Standard	0	0	Drug	RxNorm Extension	1
40976483	OMOP2174445	Albuterol 8 MG Extended Release Oral Capsule [Apsomol] Box of 100 by Farmasan	Marketed Product	Standard	0	0	Drug	RxNorm Extension	1
40976482	OMOP2174444	Albuterol 8 MG Extended Release Oral Capsule [Salbuhexal] Box of 20 by Novartis	Marketed Product	Standard	0	0	Drug	RxNorm Extension	1
40976480	OMOP2174442	Albuterol 2 MG Oral Tablet [Salbulair] Box of 50 by 3M	Marketed Product	Standard	0	0	Drug	RxNorm Extension	1
40976479	OMOP2174441	Albuterol 2 MG Oral Tablet [Salbulair] Box of 100 by 3M	Marketed Product	Standard	0	0	Drug	RxNorm Extension	1
40965126	OMOP2163088	Albuterol 8 MG Extended Release Oral Tablet [Volmac]	Branded Drug	Standard	0	0	Drug	RxNorm Extension	1
40965125	OMOP2163087	Albuterol 8 MG Extended Release Oral Capsule [Apsomol]	Branded Drug	Standard	0	0	Drug	RxNorm Extension	1
40965117	OMOP2163079	Albuterol 2 MG Oral Tablet [Sultanol]	Branded Drug	Standard	0	0	Drug	RxNorm Extension	1
40965116	OMOP2163078	Albuterol 2 MG Oral Tablet [Sultanol] Box of 1000	Branded Drug Box	Standard	0	0	Drug	RxNorm Extension	1
40965115	OMOP2163077	Albuterol 2 MG Oral Tablet [Sultanol] Box of 2400	Branded Drug Box	Standard	0	0	Drug	RxNorm Extension	1
40964439	OMOP2162401	Terbutaline 0.3 MG/ML Oral Solution [Bricanyl] Box of 1	Branded Drug Box	Standard	0	0	Drug	RxNorm Extension	1
40958904	OMOP2156866	Albuterol 4 MG Oral Tablet Box of 800	Clinical Drug Box	Standard	0	0	Drug	RxNorm Extension	1
40950225	OMOP2148187	bambuterol 10 MG Oral Tablet [Bambec] Box of 20 by Beragena	Marketed Product	Standard	0	0	Drug	RxNorm Extension	1
40950224	OMOP2148186	bambuterol 10 MG Oral Tablet [Bambec] Box of 50 by Emra-Med	Marketed Product	Standard	0	0	Drug	RxNorm Extension	1
40950223	OMOP2148185	bambuterol 10 MG Oral Tablet [Bambec] Box of 100 by Aca Mueller	Marketed Product	Standard	0	0	Drug	RxNorm Extension	1
40945524	OMOP2143486	Albuterol 8 MG Extended Release Oral Tablet [Salmundin] Box of 20 by Mundipharma	Marketed Product	Standard	0	0	Drug	RxNorm Extension	1
40945523	OMOP2143485	Albuterol 8 MG Extended Release Oral Tablet [Volmac] Box of 50 by Dexcel-Pharma	Marketed Product	Standard	0	0	Drug	RxNorm Extension	1
40945522	OMOP2143484	Albuterol 8 MG Extended Release Oral Capsule [Apsomol] Box of 20 by Farmasan	Marketed Product	Standard	0	0	Drug	RxNorm Extension	1
40945521	OMOP2143483	Albuterol 8 MG Extended Release Oral Capsule [Salbuhexal] Box of 50 by Novartis	Marketed Product	Standard	0	0	Drug	RxNorm Extension	1
40943261	OMOP2141223	bambuterol 10 MG Oral Tablet [Bambec] Box of 500	Branded Drug Box	Standard	0	0	Drug	RxNorm Extension	1
40933928	OMOP2131890	Albuterol 4 MG Oral Tablet [Sultanol] Box of 1000	Branded Drug Box	Standard	0	0	Drug	RxNorm Extension	1
40933927	OMOP2131889	Albuterol 4 MG Oral Tablet [Loftan] Box of 400	Branded Drug Box	Standard	0	0	Drug	RxNorm Extension	1
40933926	OMOP2131888	Albuterol 8 MG Extended Release Oral Tablet [Salmundin]	Branded Drug	Standard	0	0	Drug	RxNorm Extension	1
40933925	OMOP2131887	Albuterol 8 MG Extended Release Oral Tablet [Sultanol] Box of 1000	Branded Drug Box	Standard	0	0	Drug	RxNorm Extension	1
40933924	OMOP2131886	Albuterol 8 MG Extended Release Oral Tablet [Sultanol] Box of 2400	Branded Drug Box	Standard	0	0	Drug	RxNorm Extension	1
40933917	OMOP2131879	Albuterol 2 MG Oral Tablet [Sultanol] Box of 400	Branded Drug Box	Standard	0	0	Drug	RxNorm Extension	1
40927344	OMOP2125306	Terbutaline 0.3 MG/ML Oral Solution Box of 1	Clinical Drug Box	Standard	0	0	Drug	RxNorm Extension	1
40914163	OMOP2112125	Albuterol 8 MG Extended Release Oral Tablet Box of 20 by Dexcel-Pharma	Marketed Product	Standard	0	0	Drug	RxNorm Extension	1
40914161	OMOP2112123	Albuterol 8 MG Extended Release Oral Tablet [Salmundin] Box of 50 by Mundipharma	Marketed Product	Standard	0	0	Drug	RxNorm Extension	1
40902742	OMOP2100704	Albuterol 8 MG Extended Release Oral Tablet [Loftan] Box of 400	Branded Drug Box	Standard	0	0	Drug	RxNorm Extension	1
40902741	OMOP2100703	Albuterol 8 MG Extended Release Oral Tablet [Sultanol] Box of 5000	Branded Drug Box	Standard	0	0	Drug	RxNorm Extension	1
40902740	OMOP2100702	Albuterol 8 MG Extended Release Oral Tablet [Volmac] Box of 50	Branded Drug Box	Standard	0	0	Drug	RxNorm Extension	1
40900201	OMOP2098163	bambuterol 10 MG Oral Tablet Box of 500	Clinical Drug Box	Standard	0	0	Drug	RxNorm Extension	1
40896631	OMOP2094593	Albuterol 8 MG Extended Release Oral Tablet Box of 1000	Clinical Drug Box	Standard	0	0	Drug	RxNorm Extension	1
40896628	OMOP2094590	Albuterol 2 MG Oral Tablet Box of 100	Clinical Drug Box	Standard	0	0	Drug	RxNorm Extension	1
40888088	OMOP2086050	bambuterol 10 MG Oral Tablet [Bambec] Box of 20 by Astrazeneca	Marketed Product	Standard	0	0	Drug	RxNorm Extension	1
40888087	OMOP2086049	bambuterol 10 MG Oral Tablet [Bambec] Box of 100 by Mevita	Marketed Product	Standard	0	0	Drug	RxNorm Extension	1
40871711	OMOP2069673	Albuterol 4 MG Oral Tablet [Sultanol] Box of 100	Branded Drug Box	Standard	0	0	Drug	RxNorm Extension	1
40871710	OMOP2069672	Albuterol 4 MG Oral Tablet [Sultanol] Box of 400	Branded Drug Box	Standard	0	0	Drug	RxNorm Extension	1
40871709	OMOP2069671	Albuterol 4 MG Oral Tablet [Sultanol] Box of 800	Branded Drug Box	Standard	0	0	Drug	RxNorm Extension	1
40871708	OMOP2069670	Albuterol 4 MG Oral Tablet [Salmundin] Box of 20	Branded Drug Box	Standard	0	0	Drug	RxNorm Extension	1
40871707	OMOP2069669	Albuterol 4 MG Oral Tablet [Salmundin] Box of 100	Branded Drug Box	Standard	0	0	Drug	RxNorm Extension	1
40871705	OMOP2069667	Albuterol 8 MG Extended Release Oral Tablet [Sultanol]	Branded Drug	Standard	0	0	Drug	RxNorm Extension	1
40871704	OMOP2069666	Albuterol 8 MG Extended Release Oral Tablet [Sultanol] Box of 400	Branded Drug Box	Standard	0	0	Drug	RxNorm Extension	1
40871697	OMOP2069659	Albuterol 2 MG Oral Tablet [Sultanol] Box of 20	Branded Drug Box	Standard	0	0	Drug	RxNorm Extension	1
40869133	OMOP2067095	bambuterol 10 MG Oral Tablet Box of 150	Clinical Drug Box	Standard	0	0	Drug	RxNorm Extension	1
40865444	OMOP2063406	Albuterol 4 MG Oral Tablet Box of 100	Clinical Drug Box	Standard	0	0	Drug	RxNorm Extension	1
40865443	OMOP2063405	Albuterol 4 MG Oral Tablet Box of 500	Clinical Drug Box	Standard	0	0	Drug	RxNorm Extension	1
40865442	OMOP2063404	Albuterol 8 MG Extended Release Oral Tablet Box of 400	Clinical Drug Box	Standard	0	0	Drug	RxNorm Extension	1
40865435	OMOP2063397	Albuterol 2 MG Oral Tablet Box of 2500	Clinical Drug Box	Standard	0	0	Drug	RxNorm Extension	1
40856766	OMOP2054728	bambuterol 10 MG Oral Tablet [Bambec] Box of 50 by Kohlpharma	Marketed Product	Standard	0	0	Drug	RxNorm Extension	1
40840579	OMOP2038541	Albuterol 4 MG Oral Tablet [Salbulair]	Branded Drug	Standard	0	0	Drug	RxNorm Extension	1
40840578	OMOP2038540	Albuterol 4 MG Oral Tablet [Salmundin] Box of 50	Branded Drug Box	Standard	0	0	Drug	RxNorm Extension	1
40840577	OMOP2038539	Albuterol 4 MG Oral Tablet [Volmac] Box of 100	Branded Drug Box	Standard	0	0	Drug	RxNorm Extension	1
40840576	OMOP2038538	Albuterol 8 MG Extended Release Oral Tablet [Loftan] Box of 100	Branded Drug Box	Standard	0	0	Drug	RxNorm Extension	1
40840567	OMOP2038529	Albuterol 2 MG Oral Tablet [Sultanol] Box of 50	Branded Drug Box	Standard	0	0	Drug	RxNorm Extension	1
40839871	OMOP2037833	Terbutaline 5 MG Oral Tablet [Bricanyl] Box of 50	Branded Drug Box	Standard	0	0	Drug	RxNorm Extension	1
40838016	OMOP2035978	bambuterol 10 MG Oral Tablet Box of 20	Clinical Drug Box	Standard	0	0	Drug	RxNorm Extension	1
40825151	OMOP2023113	Albuterol 2 MG Oral Tablet Box of 500	Clinical Drug Box	Standard	0	0	Drug	RxNorm Extension	1
40822405	OMOP2020367	Albuterol 2 MG Oral Tablet [Salbulair]	Branded Drug	Standard	0	0	Drug	RxNorm Extension	1
40821895	OMOP2019857	Albuterol 4 MG Oral Tablet [Salmundin] Box of 20 by Mundipharma	Marketed Product	Standard	0	0	Drug	RxNorm Extension	1
40749531	OMOP4708177	bambuterol 20 MG Oral Tablet [Bambec] by Sigma	Marketed Product	Standard	0	0	Drug	RxNorm Extension	1
40749530	OMOP4708178	bambuterol 20 MG Oral Tablet [Bambec] Box of 30 by Sigma	Marketed Product	Standard	0	0	Drug	RxNorm Extension	1
40748905	OMOP4708174	bambuterol 10 MG Oral Tablet [Bambec] by Sigma	Marketed Product	Standard	0	0	Drug	RxNorm Extension	1
40748904	OMOP4708175	bambuterol 10 MG Oral Tablet [Bambec] Box of 30 by Sigma	Marketed Product	Standard	0	0	Drug	RxNorm Extension	1
40748903	OMOP4708176	bambuterol 10 MG Oral Tablet [Bambec] Box of 30 by Astrazeneca	Marketed Product	Standard	0	0	Drug	RxNorm Extension	1
40723758	OMOP4733939	Albuterol 8 MG Extended Release Oral Tablet [Volmax] by Sigma	Marketed Product	Standard	0	0	Drug	RxNorm Extension	1
40723757	OMOP4733940	Albuterol 8 MG Extended Release Oral Tablet [Volmax] Box of 56 by Sigma	Marketed Product	Standard	0	0	Drug	RxNorm Extension	1
40171427	901484	12 HR Albuterol 8 MG Extended Release Oral Tablet [Vospire]	Quant Branded Drug	Standard	0	0	Drug	RxNorm	1
40171426	901483	12 HR Albuterol 4 MG Extended Release Oral Tablet [Vospire]	Quant Branded Drug	Standard	0	0	Drug	RxNorm	1
40166145	865204	12 HR Terbutaline Sulfate 7.5 MG Extended Release Oral Tablet	Quant Clinical Drug	Standard	0	0	Drug	RxNorm	1
40163455	857670	Terbutaline Sulfate 7.5 MG Extended Release Oral Tablet	Clinical Drug	Standard	0	0	Drug	RxNorm	1
40163454	857669	Terbutaline Sulfate 7.5 MG	Clinical Drug Comp	Standard	0	0	Drug	RxNorm	1
40163451	857687	Terbutaline Sulfate 5 MG Oral Tablet [Bricanyl]	Branded Drug	Standard	0	0	Drug	RxNorm	1
40163450	857685	Terbutaline Sulfate 5 MG Oral Tablet [Brethine]	Branded Drug	Standard	0	0	Drug	RxNorm	1
40163427	857660	Terbutaline Sulfate 0.3 MG/ML Oral Solution	Clinical Drug	Standard	0	0	Drug	RxNorm	1
40163426	857659	Terbutaline Sulfate 0.3 MG/ML	Clinical Drug Comp	Standard	0	0	Drug	RxNorm	1
40096077	370986	bambuterol Oral Tablet	Clinical Drug Form	Standard	0	0	Drug	RxNorm	1
40085746	374039	Terbutaline Oral Solution	Clinical Drug Form	Standard	0	0	Drug	RxNorm	1
40085737	374041	Terbutaline Extended Release Oral Tablet	Clinical Drug Form	Standard	0	0	Drug	RxNorm	1
40006960	379496	Albuterol Extended Release Oral Capsule	Clinical Drug Form	Standard	0	0	Drug	RxNorm	1
36782814	OMOP4771097	Albuterol 0.4 MG/ML Oral Solution Box of 1	Clinical Drug Box	Standard	0	0	Drug	RxNorm Extension	1
36782813	OMOP4771096	Albuterol 0.4 MG/ML Oral Solution [Ventolin] Box of 1	Branded Drug Box	Standard	0	0	Drug	RxNorm Extension	1
36780459	OMOP4768757	5 ML Albuterol 1 MG/ML Intravenous Solution [Ventolin] Box of 1	Quant Branded Box	Standard	0	0	Drug	RxNorm Extension	1
36780458	OMOP4768756	5 ML Albuterol 1 MG/ML Intravenous Solution [Ventolin] Box of 1 by GSK	Marketed Product	Standard	0	0	Drug	RxNorm Extension	1
36778415	OMOP4766738	150 ML Albuterol 0.4 MG/ML Oral Solution Box of 1	Quant Clinical Box	Standard	0	0	Drug	RxNorm Extension	1
36778414	OMOP4766737	150 ML Albuterol 0.4 MG/ML Oral Solution [Ventolin] Box of 1	Quant Branded Box	Standard	0	0	Drug	RxNorm Extension	1
36778413	OMOP4766736	150 ML Albuterol 0.4 MG/ML Oral Solution [Ventolin] Box of 1 by GSK	Marketed Product	Standard	0	0	Drug	RxNorm Extension	1
36281731	OMOP3132606	150 ML Albuterol 0.4 MG/ML Oral Solution [Ventolin] by GSK	Marketed Product	Standard	0	0	Drug	RxNorm Extension	1
36278912	OMOP3129787	5 ML Albuterol 1 MG/ML Injection [Ventolin] by GSK	Marketed Product	Standard	0	0	Drug	RxNorm Extension	1
36278802	OMOP3129677	5 ML Albuterol 1 MG/ML Injection [Ventolin]	Quant Branded Drug	Standard	0	0	Drug	RxNorm Extension	1
36272721	OMOP3123596	Albuterol 2 MG Oral Tablet [Ventolin] Box of 100	Branded Drug Box	Standard	0	0	Drug	RxNorm Extension	1
36271417	OMOP3122292	Albuterol 2 MG Oral Tablet [Ventolin] Box of 100 by GSK	Marketed Product	Standard	0	0	Drug	RxNorm Extension	1
36225534	1158859	bambuterol Pill	Clinical Dose Group	Classification	0	0	Drug	RxNorm	1
36225533	1158858	bambuterol Oral Product	Clinical Dose Group	Classification	0	0	Drug	RxNorm	1
35773765	OMOP2775226	Albuterol 4 MG Extended Release Oral Tablet by Alliance	Marketed Product	Standard	0	0	Drug	RxNorm Extension	1
35773764	OMOP2775225	Albuterol 4 MG Extended Release Oral Tablet by DE	Marketed Product	Standard	0	0	Drug	RxNorm Extension	1
35769394	OMOP2770855	Albuterol 4 MG Extended Release Oral Tablet by Approved Prescription	Marketed Product	Standard	0	0	Drug	RxNorm Extension	1
35769393	OMOP2770854	Albuterol 4 MG Extended Release Oral Tablet Box of 28 by Kent	Marketed Product	Standard	0	0	Drug	RxNorm Extension	1
35769392	OMOP2770853	Albuterol 4 MG Extended Release Oral Tablet Box of 28 by Alliance	Marketed Product	Standard	0	0	Drug	RxNorm Extension	1
35769391	OMOP2770852	Albuterol 4 MG Extended Release Oral Tablet Box of 28 by Waymade	Marketed Product	Standard	0	0	Drug	RxNorm Extension	1
35765171	OMOP2766632	Albuterol 4 MG Extended Release Oral Tablet by A A H	Marketed Product	Standard	0	0	Drug	RxNorm Extension	1
35765170	OMOP2766631	Albuterol 4 MG Extended Release Oral Tablet Box of 28 by Approved Prescription	Marketed Product	Standard	0	0	Drug	RxNorm Extension	1
35758219	OMOP2759680	Albuterol 4 MG Extended Release Oral Tablet Box of 28	Clinical Drug Box	Standard	0	0	Drug	RxNorm Extension	1
35756903	OMOP2758364	Albuterol 4 MG Extended Release Oral Tablet by Actavis	Marketed Product	Standard	0	0	Drug	RxNorm Extension	1
35756902	OMOP2758363	Albuterol 4 MG Extended Release Oral Tablet Box of 28 by Actavis	Marketed Product	Standard	0	0	Drug	RxNorm Extension	1
35752693	OMOP2754154	Albuterol 4 MG Extended Release Oral Tablet by Kent	Marketed Product	Standard	0	0	Drug	RxNorm Extension	1
35752692	OMOP2754153	Albuterol 4 MG Extended Release Oral Tablet Box of 28 by DE	Marketed Product	Standard	0	0	Drug	RxNorm Extension	1
35744340	OMOP2745801	Albuterol 4 MG Extended Release Oral Tablet Box of 28 by A A H	Marketed Product	Standard	0	0	Drug	RxNorm Extension	1
35159832	OMOP4816814	Albuterol 2 MG Oral Tablet by Nichi-Iko	Marketed Product	Standard	0	0	Drug	RxNorm Extension	1
35150307	OMOP4807359	1 ML Albuterol 0.4 MG/ML Oral Solution [Venetlin]	Quant Branded Drug	Standard	0	0	Drug	RxNorm Extension	1
35143651	OMOP4800751	Albuterol 2 MG Oral Tablet [Venetlin]	Branded Drug	Standard	0	0	Drug	RxNorm Extension	1
35139690	OMOP4796843	1 ML Albuterol 0.4 MG/ML Oral Solution	Quant Clinical Drug	Standard	0	0	Drug	RxNorm Extension	1
35138382	OMOP4795543	Albuterol 0.4 MG/ML Oral Solution [Venetlin]	Branded Drug	Standard	0	0	Drug	RxNorm Extension	1
21603325	R03CC53	terbutaline, combinations	ATC 5th	Classification	0	0	Drug	ATC	1
21603324	R03CC14	reproterol	ATC 5th	Classification	0	0	Drug	ATC	1
21603323	R03CC13	clenbuterol	ATC 5th	Classification	0	0	Drug	ATC	1
21603322	R03CC12	bambuterol	ATC 5th	Classification	0	0	Drug	ATC	1
21603321	R03CC11	tulobuterol	ATC 5th	Classification	0	0	Drug	ATC	1
21603320	R03CC10	carbuterol	ATC 5th	Classification	0	0	Drug	ATC	1
21603319	R03CC09	tretoquinol	ATC 5th	Classification	0	0	Drug	ATC	1
21603318	R03CC08	procaterol	ATC 5th	Classification	0	0	Drug	ATC	1
21603317	R03CC07	pirbuterol	ATC 5th	Classification	0	0	Drug	ATC	1
21603316	R03CC06	isoetarine	ATC 5th	Classification	0	0	Drug	ATC	1
21603315	R03CC05	hexoprenaline	ATC 5th	Classification	0	0	Drug	ATC	1
21603314	R03CC04	fenoterol	ATC 5th	Classification	0	0	Drug	ATC	1
21177516	OMOP328918	300 ML Terbutaline 0.3 MG/ML Oral Solution [Monovent]	Quant Branded Drug	Standard	0	0	Drug	RxNorm Extension	1
21177329	OMOP325702	150 ML Albuterol 0.4 MG/ML Oral Solution [Ventolin] by Glaxosmithkline	Marketed Product	Standard	0	0	Drug	RxNorm Extension	1
21176183	OMOP307388	5 ML Albuterol 1 MG/ML Injection Box of 10	Quant Clinical Box	Standard	0	0	Drug	RxNorm Extension	1
21174108	OMOP266400	Terbutaline 0.3 MG/ML Oral Solution [Monovent] by Sandoz	Marketed Product	Standard	0	0	Drug	RxNorm Extension	1
21170234	OMOP360851	Albuterol 4 MG Oral Tablet Box of 28	Clinical Drug Box	Standard	0	0	Drug	RxNorm Extension	1
21170233	OMOP360835	Albuterol 8 MG Extended Release Oral Tablet [Volmax] Box of 56 by Sigma-Tau	Marketed Product	Standard	0	0	Drug	RxNorm Extension	1
21169409	OMOP346272	bambuterol 10 MG Oral Tablet [Bambec] by Astrazeneca	Marketed Product	Standard	0	0	Drug	RxNorm Extension	1
21169408	OMOP346256	bambuterol 20 MG Oral Tablet Box of 28	Clinical Drug Box	Standard	0	0	Drug	RxNorm Extension	1
21167774	OMOP328910	300 ML Terbutaline 0.3 MG/ML Oral Solution	Quant Clinical Drug	Standard	0	0	Drug	RxNorm Extension	1
21167590	OMOP325696	150 ML Albuterol 0.4 MG/ML Oral Solution by Kent	Marketed Product	Standard	0	0	Drug	RxNorm Extension	1
21166033	OMOP299456	1 ML Terbutaline 0.5 MG/ML Prefilled Syringe Box of 5	Quant Clinical Box	Standard	0	0	Drug	RxNorm Extension	1
21164325	OMOP266415	Terbutaline 5 MG Oral Tablet [Bricanyl] Box of 100	Branded Drug Box	Standard	0	0	Drug	RxNorm Extension	1
21164324	OMOP266398	Terbutaline 0.3 MG/ML Oral Solution [Bricanyl] by Astrazeneca	Marketed Product	Standard	0	0	Drug	RxNorm Extension	1
21164323	OMOP266396	Terbutaline 0.3 MG/ML Oral Solution by Alliance	Marketed Product	Standard	0	0	Drug	RxNorm Extension	1
21160449	OMOP360866	Albuterol 4 MG Extended Release Oral Tablet [Volmax] by Glaxosmithkline	Marketed Product	Standard	0	0	Drug	RxNorm Extension	1
21160448	OMOP360864	Albuterol 4 MG Extended Release Oral Tablet Box of 60	Clinical Drug Box	Standard	0	0	Drug	RxNorm Extension	1
21160447	OMOP360861	Albuterol 4 MG Extended Release Oral Tablet by Dowelhurst	Marketed Product	Standard	0	0	Drug	RxNorm Extension	1
21160446	OMOP360852	Albuterol 4 MG Oral Tablet Box of 28 by Kent	Marketed Product	Standard	0	0	Drug	RxNorm Extension	1
21160445	OMOP360807	Albuterol 2 MG Oral Tablet Box of 28 by Kent	Marketed Product	Standard	0	0	Drug	RxNorm Extension	1
21160444	OMOP360803	Albuterol 2 MG Oral Tablet by A A H	Marketed Product	Standard	0	0	Drug	RxNorm Extension	1
21159638	OMOP346277	bambuterol 10 MG Oral Tablet [Bambec] Box of 30 by Mawdsley-Brooks	Marketed Product	Standard	0	0	Drug	RxNorm Extension	1
21159637	OMOP346261	bambuterol 20 MG Oral Tablet [Bambec] Box of 28	Branded Drug Box	Standard	0	0	Drug	RxNorm Extension	1
21159636	OMOP346257	bambuterol 20 MG Oral Tablet Box of 30	Clinical Drug Box	Standard	0	0	Drug	RxNorm Extension	1
21158000	OMOP328919	300 ML Terbutaline 0.3 MG/ML Oral Solution [Monovent] by Sandoz	Marketed Product	Standard	0	0	Drug	RxNorm Extension	1
21157798	OMOP325701	150 ML Albuterol 0.4 MG/ML Oral Solution [Ventolin]	Quant Branded Drug	Standard	0	0	Drug	RxNorm Extension	1
21156739	OMOP308752	5 ML Terbutaline 0.5 MG/ML Prefilled Syringe [Bricanyl] Box of 10 by Astrazeneca	Marketed Product	Standard	0	0	Drug	RxNorm Extension	1
21150502	OMOP360916	Albuterol 0.4 MG/ML Oral Solution [Salapin]	Branded Drug	Standard	0	0	Drug	RxNorm Extension	1
21150498	OMOP360865	Albuterol 4 MG Extended Release Oral Tablet Box of 60 by Waymade	Marketed Product	Standard	0	0	Drug	RxNorm Extension	1
21150497	OMOP360850	Albuterol 4 MG Oral Tablet by Actavis	Marketed Product	Standard	0	0	Drug	RxNorm Extension	1
21150496	OMOP360827	Albuterol 8 MG Extended Release Oral Tablet Box of 56 by Dowelhurst	Marketed Product	Standard	0	0	Drug	RxNorm Extension	1
21150495	OMOP360822	Albuterol 8 MG Extended Release Oral Capsule [Ventmax SR] Box of 56 by Chiesi	Marketed Product	Standard	0	0	Drug	RxNorm Extension	1
21150494	OMOP360808	Albuterol 2 MG Oral Tablet Box of 28 by Alliance	Marketed Product	Standard	0	0	Drug	RxNorm Extension	1
21150493	OMOP360806	Albuterol 2 MG Oral Tablet Box of 28	Clinical Drug Box	Standard	0	0	Drug	RxNorm Extension	1
21150492	OMOP360804	Albuterol 2 MG Oral Tablet by Approved Prescription	Marketed Product	Standard	0	0	Drug	RxNorm Extension	1
21150491	OMOP360802	Albuterol 2 MG Oral Tablet by DE	Marketed Product	Standard	0	0	Drug	RxNorm Extension	1
21150490	OMOP360800	Albuterol 2 MG Oral Tablet by Waymade	Marketed Product	Standard	0	0	Drug	RxNorm Extension	1
21150489	OMOP360798	Albuterol 2 MG Oral Tablet by Kent	Marketed Product	Standard	0	0	Drug	RxNorm Extension	1
21149700	OMOP346253	bambuterol Oral Tablet [Bambec]	Branded Drug Form	Standard	0	0	Drug	RxNorm Extension	1
21140661	OMOP360914	Albuterol 0.4 MG/ML Oral Solution by Pinewood	Marketed Product	Standard	0	0	Drug	RxNorm Extension	1
21139841	OMOP346267	bambuterol 10 MG Oral Tablet Box of 28	Clinical Drug Box	Standard	0	0	Drug	RxNorm Extension	1
21137965	OMOP325704	150 ML Albuterol 0.4 MG/ML Oral Solution [Salapin] by Pinewood	Marketed Product	Standard	0	0	Drug	RxNorm Extension	1
21137964	OMOP325697	150 ML Albuterol 0.4 MG/ML Oral Solution by Sandoz	Marketed Product	Standard	0	0	Drug	RxNorm Extension	1
21136052	OMOP292625	1 ML Albuterol 0.5 MG/ML Prefilled Syringe [Ventolin]	Quant Branded Drug	Standard	0	0	Drug	RxNorm Extension	1
21134692	OMOP266395	Terbutaline 0.3 MG/ML Oral Solution by Kent	Marketed Product	Standard	0	0	Drug	RxNorm Extension	1
21130710	OMOP360862	Albuterol 4 MG Extended Release Oral Tablet Box of 56	Clinical Drug Box	Standard	0	0	Drug	RxNorm Extension	1
21130709	OMOP360837	Albuterol 8 MG Extended Release Oral Tablet [Volmax] Box of 56 by Dowelhurst	Marketed Product	Standard	0	0	Drug	RxNorm Extension	1
21130708	OMOP360831	Albuterol 8 MG Extended Release Oral Tablet [Volmax] by Glaxosmithkline	Marketed Product	Standard	0	0	Drug	RxNorm Extension	1
21130707	OMOP360820	Albuterol 8 MG Extended Release Oral Capsule [Ventmax SR] by Chiesi	Marketed Product	Standard	0	0	Drug	RxNorm Extension	1
21129930	OMOP346270	bambuterol 10 MG Oral Tablet [Bambec] by Mawdsley-Brooks	Marketed Product	Standard	0	0	Drug	RxNorm Extension	1
21129929	OMOP346266	bambuterol 10 MG [Bambec]	Branded Drug Comp	Standard	0	0	Drug	RxNorm Extension	1
21129928	OMOP346262	bambuterol 20 MG Oral Tablet [Bambec] Box of 28 by Astrazeneca	Marketed Product	Standard	0	0	Drug	RxNorm Extension	1
21128297	OMOP328915	300 ML Terbutaline 0.3 MG/ML Oral Solution [Bricanyl] by Astrazeneca	Marketed Product	Standard	0	0	Drug	RxNorm Extension	1
21127568	OMOP318115	50 ML Albuterol 0.1 MG/ML Injection by Martindale	Marketed Product	Standard	0	0	Drug	RxNorm Extension	1
21127025	OMOP308749	5 ML Terbutaline 0.5 MG/ML Prefilled Syringe [Bricanyl]	Quant Branded Drug	Standard	0	0	Drug	RxNorm Extension	1
21124765	OMOP266399	Terbutaline 0.3 MG/ML Oral Solution [Monovent]	Branded Drug	Standard	0	0	Drug	RxNorm Extension	1
21120937	OMOP360843	Albuterol 4 MG Oral Tablet by Kent	Marketed Product	Standard	0	0	Drug	RxNorm Extension	1
21120936	OMOP360834	Albuterol 8 MG Extended Release Oral Tablet [Volmax] Box of 56	Branded Drug Box	Standard	0	0	Drug	RxNorm Extension	1
21120935	OMOP360826	Albuterol 8 MG Extended Release Oral Tablet Box of 56	Clinical Drug Box	Standard	0	0	Drug	RxNorm Extension	1
21120934	OMOP360799	Albuterol 2 MG Oral Tablet by Alliance	Marketed Product	Standard	0	0	Drug	RxNorm Extension	1
21120149	OMOP346268	bambuterol 10 MG Oral Tablet Box of 30	Clinical Drug Box	Standard	0	0	Drug	RxNorm Extension	1
21120148	OMOP346259	bambuterol 20 MG Oral Tablet [Bambec] by Sigma-Tau	Marketed Product	Standard	0	0	Drug	RxNorm Extension	1
21118349	OMOP325695	150 ML Albuterol 0.4 MG/ML Oral Solution	Quant Clinical Drug	Standard	0	0	Drug	RxNorm Extension	1
21118286	OMOP324138	100 ML Terbutaline 0.3 MG/ML Oral Solution [Bricanyl] by Astrazeneca	Marketed Product	Standard	0	0	Drug	RxNorm Extension	1
21116807	OMOP299461	1 ML Terbutaline 0.5 MG/ML Prefilled Syringe [Bricanyl] Box of 5 by Astrazeneca	Marketed Product	Standard	0	0	Drug	RxNorm Extension	1
21116442	OMOP292627	1 ML Albuterol 0.5 MG/ML Prefilled Syringe [Ventolin] Box of 5	Quant Branded Box	Standard	0	0	Drug	RxNorm Extension	1
21115164	OMOP266414	Terbutaline 5 MG Oral Tablet [Bricanyl] by Astrazeneca	Marketed Product	Standard	0	0	Drug	RxNorm Extension	1
21111258	OMOP360841	Albuterol 4 MG Extended Release Oral Capsule [Ventmax SR] Box of 56	Branded Drug Box	Standard	0	0	Drug	RxNorm Extension	1
21111257	OMOP360832	Albuterol 8 MG Extended Release Oral Tablet [Volmax] by Dowelhurst	Marketed Product	Standard	0	0	Drug	RxNorm Extension	1
21107052	OMOP299455	1 ML Terbutaline 0.5 MG/ML Prefilled Syringe	Quant Clinical Drug	Standard	0	0	Drug	RxNorm Extension	1
21105348	OMOP266422	Terbutaline 7.5 MG Extended Release Oral Tablet [Bricanyl SA] Box of 60	Branded Drug Box	Standard	0	0	Drug	RxNorm Extension	1
21101425	OMOP360867	Albuterol 4 MG Extended Release Oral Tablet [Volmax] by Dowelhurst	Marketed Product	Standard	0	0	Drug	RxNorm Extension	1
21101424	OMOP360848	Albuterol 4 MG Oral Tablet by Approved Prescription	Marketed Product	Standard	0	0	Drug	RxNorm Extension	1
21101423	OMOP360840	Albuterol 4 MG Extended Release Oral Capsule [Ventmax SR] by Chiesi	Marketed Product	Standard	0	0	Drug	RxNorm Extension	1
21101421	OMOP360814	Albuterol 2 MG Oral Tablet Box of 28 by Actavis	Marketed Product	Standard	0	0	Drug	RxNorm Extension	1
21101420	OMOP360805	Albuterol 2 MG Oral Tablet by Actavis	Marketed Product	Standard	0	0	Drug	RxNorm Extension	1
21100631	OMOP346278	bambuterol 10 MG Oral Tablet [Bambec] Box of 30 by Sigma-Tau	Marketed Product	Standard	0	0	Drug	RxNorm Extension	1
21100630	OMOP346260	bambuterol 20 MG Oral Tablet [Bambec] by Astrazeneca	Marketed Product	Standard	0	0	Drug	RxNorm Extension	1
21098977	OMOP328914	300 ML Terbutaline 0.3 MG/ML Oral Solution [Bricanyl]	Quant Branded Drug	Standard	0	0	Drug	RxNorm Extension	1
21098976	OMOP328912	300 ML Terbutaline 0.3 MG/ML Oral Solution by Alliance	Marketed Product	Standard	0	0	Drug	RxNorm Extension	1
21098778	OMOP325703	150 ML Albuterol 0.4 MG/ML Oral Solution [Salapin]	Quant Branded Drug	Standard	0	0	Drug	RxNorm Extension	1
21098233	OMOP318116	50 ML Albuterol 0.1 MG/ML Injection Box of 1	Quant Clinical Box	Standard	0	0	Drug	RxNorm Extension	1
21097683	OMOP308751	5 ML Terbutaline 0.5 MG/ML Prefilled Syringe [Bricanyl] Box of 10	Quant Branded Box	Standard	0	0	Drug	RxNorm Extension	1
21097206	OMOP299458	1 ML Terbutaline 0.5 MG/ML Prefilled Syringe [Bricanyl] by Astrazeneca	Marketed Product	Standard	0	0	Drug	RxNorm Extension	1
21096839	OMOP292623	1 ML Albuterol 0.5 MG/ML Prefilled Syringe	Quant Clinical Drug	Standard	0	0	Drug	RxNorm Extension	1
21095483	OMOP266419	Terbutaline 7.5 MG Extended Release Oral Tablet Box of 60	Clinical Drug Box	Standard	0	0	Drug	RxNorm Extension	1
21091532	OMOP360868	Albuterol 4 MG Extended Release Oral Tablet [Volmax] Box of 56	Branded Drug Box	Standard	0	0	Drug	RxNorm Extension	1
21091531	OMOP360844	Albuterol 4 MG Oral Tablet by Alliance	Marketed Product	Standard	0	0	Drug	RxNorm Extension	1
21091530	OMOP360838	Albuterol 4 MG Extended Release Oral Capsule Box of 56	Clinical Drug Box	Standard	0	0	Drug	RxNorm Extension	1
21091529	OMOP360809	Albuterol 2 MG Oral Tablet Box of 28 by Waymade	Marketed Product	Standard	0	0	Drug	RxNorm Extension	1
21090671	OMOP346275	bambuterol 10 MG Oral Tablet [Bambec] Box of 28 by Astrazeneca	Marketed Product	Standard	0	0	Drug	RxNorm Extension	1
21089061	OMOP328913	300 ML Terbutaline 0.3 MG/ML Oral Solution by A A H	Marketed Product	Standard	0	0	Drug	RxNorm Extension	1
21089060	OMOP328911	300 ML Terbutaline 0.3 MG/ML Oral Solution by Kent	Marketed Product	Standard	0	0	Drug	RxNorm Extension	1
21088882	OMOP325700	150 ML Albuterol 0.4 MG/ML Oral Solution by Pinewood	Marketed Product	Standard	0	0	Drug	RxNorm Extension	1
21088881	OMOP325699	150 ML Albuterol 0.4 MG/ML Oral Solution by A A H	Marketed Product	Standard	0	0	Drug	RxNorm Extension	1
21087862	OMOP308747	5 ML Terbutaline 0.5 MG/ML Prefilled Syringe	Quant Clinical Drug	Standard	0	0	Drug	RxNorm Extension	1
21087382	OMOP299460	1 ML Terbutaline 0.5 MG/ML Prefilled Syringe [Bricanyl] Box of 5	Quant Branded Box	Standard	0	0	Drug	RxNorm Extension	1
21081766	OMOP360871	Albuterol 4 MG Extended Release Oral Tablet [Volmax] Box of 56 by Dowelhurst	Marketed Product	Standard	0	0	Drug	RxNorm Extension	1
21081765	OMOP360856	Albuterol 4 MG Oral Tablet Box of 28 by A A H	Marketed Product	Standard	0	0	Drug	RxNorm Extension	1
21081764	OMOP360847	Albuterol 4 MG Oral Tablet by A A H	Marketed Product	Standard	0	0	Drug	RxNorm Extension	1
21080951	OMOP346273	bambuterol 10 MG Oral Tablet [Bambec] Box of 28	Branded Drug Box	Standard	0	0	Drug	RxNorm Extension	1
21080950	OMOP346263	bambuterol 20 MG Oral Tablet [Bambec] Box of 30	Branded Drug Box	Standard	0	0	Drug	RxNorm Extension	1
21078125	OMOP308750	5 ML Terbutaline 0.5 MG/ML Prefilled Syringe [Bricanyl] by Astrazeneca	Marketed Product	Standard	0	0	Drug	RxNorm Extension	1
21076008	OMOP266423	Terbutaline 7.5 MG Extended Release Oral Tablet [Bricanyl SA] Box of 60 by Astrazeneca	Marketed Product	Standard	0	0	Drug	RxNorm Extension	1
21072082	OMOP360858	Albuterol 4 MG Oral Tablet Box of 28 by Actavis	Marketed Product	Standard	0	0	Drug	RxNorm Extension	1
21072081	OMOP360842	Albuterol 4 MG Extended Release Oral Capsule [Ventmax SR] Box of 56 by Chiesi	Marketed Product	Standard	0	0	Drug	RxNorm Extension	1
21072080	OMOP360829	Albuterol 8 MG Extended Release Oral Tablet Box of 60 by Waymade	Marketed Product	Standard	0	0	Drug	RxNorm Extension	1
21072079	OMOP360824	Albuterol 8 MG Extended Release Oral Tablet by Waymade	Marketed Product	Standard	0	0	Drug	RxNorm Extension	1
21071251	OMOP346258	bambuterol 20 MG Oral Tablet [Bambec]	Branded Drug	Standard	0	0	Drug	RxNorm Extension	1
21071250	OMOP346254	bambuterol 20 MG [Bambec]	Branded Drug Comp	Standard	0	0	Drug	RxNorm Extension	1
21069362	OMOP324137	100 ML Terbutaline 0.3 MG/ML Oral Solution [Bricanyl]	Quant Branded Drug	Standard	0	0	Drug	RxNorm Extension	1
21068247	OMOP307387	5 ML Albuterol 1 MG/ML Injection	Quant Clinical Drug	Standard	0	0	Drug	RxNorm Extension	1
21066065	OMOP266413	Terbutaline 5 MG Oral Tablet Box of 100	Clinical Drug Box	Standard	0	0	Drug	RxNorm Extension	1
21062168	OMOP360917	Albuterol 0.4 MG/ML Oral Solution [Salapin] by Pinewood	Marketed Product	Standard	0	0	Drug	RxNorm Extension	1
21062167	OMOP360915	Albuterol 0.4 MG/ML Oral Solution [Ventolin] by Glaxosmithkline	Marketed Product	Standard	0	0	Drug	RxNorm Extension	1
21062164	OMOP360863	Albuterol 4 MG Extended Release Oral Tablet Box of 56 by Dowelhurst	Marketed Product	Standard	0	0	Drug	RxNorm Extension	1
21062163	OMOP360854	Albuterol 4 MG Oral Tablet Box of 28 by Waymade	Marketed Product	Standard	0	0	Drug	RxNorm Extension	1
21062162	OMOP360836	Albuterol 8 MG Extended Release Oral Tablet [Volmax] Box of 56 by Glaxosmithkline	Marketed Product	Standard	0	0	Drug	RxNorm Extension	1
21062161	OMOP360825	Albuterol 8 MG Extended Release Oral Tablet by Dowelhurst	Marketed Product	Standard	0	0	Drug	RxNorm Extension	1
21062160	OMOP360811	Albuterol 2 MG Oral Tablet Box of 28 by A A H	Marketed Product	Standard	0	0	Drug	RxNorm Extension	1
21061333	OMOP346269	bambuterol 10 MG Oral Tablet [Bambec]	Branded Drug	Standard	0	0	Drug	RxNorm Extension	1
21058936	OMOP318117	50 ML Albuterol 0.1 MG/ML Injection Box of 1 by Martindale	Marketed Product	Standard	0	0	Drug	RxNorm Extension	1
21057605	OMOP292624	1 ML Albuterol 0.5 MG/ML Prefilled Syringe Box of 5	Quant Clinical Box	Standard	0	0	Drug	RxNorm Extension	1
21056241	OMOP266421	Terbutaline 7.5 MG Extended Release Oral Tablet [Bricanyl SA] by Astrazeneca	Marketed Product	Standard	0	0	Drug	RxNorm Extension	1
21056239	OMOP266397	Terbutaline 0.3 MG/ML Oral Solution by A A H	Marketed Product	Standard	0	0	Drug	RxNorm Extension	1
21052340	OMOP360909	Albuterol 0.4 MG/ML Oral Solution by Kent	Marketed Product	Standard	0	0	Drug	RxNorm Extension	1
21052338	OMOP360870	Albuterol 4 MG Extended Release Oral Tablet [Volmax] Box of 56 by Glaxosmithkline	Marketed Product	Standard	0	0	Drug	RxNorm Extension	1
21052337	OMOP360857	Albuterol 4 MG Oral Tablet Box of 28 by Approved Prescription	Marketed Product	Standard	0	0	Drug	RxNorm Extension	1
21052336	OMOP360821	Albuterol 8 MG Extended Release Oral Capsule [Ventmax SR] Box of 56	Branded Drug Box	Standard	0	0	Drug	RxNorm Extension	1
21049671	OMOP325698	150 ML Albuterol 0.4 MG/ML Oral Solution by Alliance	Marketed Product	Standard	0	0	Drug	RxNorm Extension	1
21048640	OMOP308748	5 ML Terbutaline 0.5 MG/ML Prefilled Syringe Box of 10	Quant Clinical Box	Standard	0	0	Drug	RxNorm Extension	1
21048159	OMOP299457	1 ML Terbutaline 0.5 MG/ML Prefilled Syringe [Bricanyl]	Quant Branded Drug	Standard	0	0	Drug	RxNorm Extension	1
21042572	OMOP360913	Albuterol 0.4 MG/ML Oral Solution by A A H	Marketed Product	Standard	0	0	Drug	RxNorm Extension	1
21042571	OMOP360910	Albuterol 0.4 MG/ML Oral Solution by Sandoz	Marketed Product	Standard	0	0	Drug	RxNorm Extension	1
21042565	OMOP360855	Albuterol 4 MG Oral Tablet Box of 28 by DE	Marketed Product	Standard	0	0	Drug	RxNorm Extension	1
21042564	OMOP360853	Albuterol 4 MG Oral Tablet Box of 28 by Alliance	Marketed Product	Standard	0	0	Drug	RxNorm Extension	1
21039807	OMOP324136	100 ML Terbutaline 0.3 MG/ML Oral Solution	Quant Clinical Drug	Standard	0	0	Drug	RxNorm Extension	1
21039361	OMOP318114	50 ML Albuterol 0.1 MG/ML Injection	Quant Clinical Drug	Standard	0	0	Drug	RxNorm Extension	1
21037969	OMOP292626	1 ML Albuterol 0.5 MG/ML Prefilled Syringe [Ventolin] by Glaxosmithkline	Marketed Product	Standard	0	0	Drug	RxNorm Extension	1
21036611	OMOP266420	Terbutaline 7.5 MG Extended Release Oral Tablet [Bricanyl SA]	Branded Drug	Standard	0	0	Drug	RxNorm Extension	1
21032659	OMOP360912	Albuterol 0.4 MG/ML Oral Solution by Alliance	Marketed Product	Standard	0	0	Drug	RxNorm Extension	1
21032658	OMOP360810	Albuterol 2 MG Oral Tablet Box of 28 by DE	Marketed Product	Standard	0	0	Drug	RxNorm Extension	1
21031815	OMOP346276	bambuterol 10 MG Oral Tablet [Bambec] Box of 30	Branded Drug Box	Standard	0	0	Drug	RxNorm Extension	1
21028168	OMOP292629	1 ML Albuterol 0.5 MG/ML Prefilled Syringe [Ventolin] Box of 5 by Glaxosmithkline	Marketed Product	Standard	0	0	Drug	RxNorm Extension	1
21026817	OMOP266416	Terbutaline 5 MG Oral Tablet [Bricanyl] Box of 100 by Astrazeneca	Marketed Product	Standard	0	0	Drug	RxNorm Extension	1
21022903	OMOP360860	Albuterol 4 MG Extended Release Oral Tablet by Waymade	Marketed Product	Standard	0	0	Drug	RxNorm Extension	1
21022902	OMOP360846	Albuterol 4 MG Oral Tablet by DE	Marketed Product	Standard	0	0	Drug	RxNorm Extension	1
21022901	OMOP360845	Albuterol 4 MG Oral Tablet by Waymade	Marketed Product	Standard	0	0	Drug	RxNorm Extension	1
21022900	OMOP360830	Albuterol 8 MG Extended Release Oral Tablet [Volmax] by Sigma-Tau	Marketed Product	Standard	0	0	Drug	RxNorm Extension	1
21022899	OMOP360828	Albuterol 8 MG Extended Release Oral Tablet Box of 60	Clinical Drug Box	Standard	0	0	Drug	RxNorm Extension	1
21022898	OMOP360819	Albuterol 8 MG Extended Release Oral Capsule Box of 56	Clinical Drug Box	Standard	0	0	Drug	RxNorm Extension	1
21022897	OMOP360813	Albuterol 2 MG Oral Tablet Box of 28 by Approved Prescription	Marketed Product	Standard	0	0	Drug	RxNorm Extension	1
21022087	OMOP346271	bambuterol 10 MG Oral Tablet [Bambec] by Sigma-Tau	Marketed Product	Standard	0	0	Drug	RxNorm Extension	1
21022086	OMOP346264	bambuterol 20 MG Oral Tablet [Bambec] Box of 30 by Sigma-Tau	Marketed Product	Standard	0	0	Drug	RxNorm Extension	1
19134868	845060	Albuterol 4 MG Extended Release Oral Tablet [Proventil]	Branded Drug	Standard	0	0	Drug	RxNorm	1
19134513	844695	Albuterol 4 MG Extended Release Oral Tablet [Volmax]	Branded Drug	Standard	0	0	Drug	RxNorm	1
19134512	844694	Albuterol 8 MG Extended Release Oral Tablet [Volmax]	Branded Drug	Standard	0	0	Drug	RxNorm	1
19128603	755287	Terbutaline Sulfate 0.3 MG/ML Oral Solution [Bricanyl]	Branded Drug	Standard	0	0	Drug	RxNorm	1
19128417	754902	Albuterol 0.4 MG/ML Oral Solution [Ventolin]	Branded Drug	Standard	0	0	Drug	RxNorm	1
19128416	754901	Albuterol 0.4 MG/ML Oral Solution [Salbuvent]	Branded Drug	Standard	0	0	Drug	RxNorm	1
19128415	754900	Albuterol 0.4 MG/ML Oral Solution [Proventil]	Branded Drug	Standard	0	0	Drug	RxNorm	1
19128414	754899	Albuterol 0.4 MG/ML Oral Solution [Libetist]	Branded Drug	Standard	0	0	Drug	RxNorm	1
19098298	351960	Albuterol 4 MG Extended Release Oral Tablet [Vospire]	Branded Drug	Standard	0	0	Drug	RxNorm	1
19048068	213800	Albuterol 4 MG Oral Tablet [Proventil]	Branded Drug	Standard	0	0	Drug	RxNorm	1
19034279	332567	bambuterol 10 MG	Clinical Drug Comp	Standard	0	0	Drug	RxNorm	1
19034278	331147	bambuterol 20 MG	Clinical Drug Comp	Standard	0	0	Drug	RxNorm	1
19034275	18751	bambuterol	Ingredient	Standard	0	0	Drug	RxNorm	1
19027036	203914	Albuterol 4 MG Oral Tablet [Asmaven]	Branded Drug	Standard	0	0	Drug	RxNorm	1
19027035	203913	Albuterol 4 MG Oral Tablet [Cobutolin]	Branded Drug	Standard	0	0	Drug	RxNorm	1
19027034	203912	Albuterol 4 MG Oral Tablet [Salbuvent]	Branded Drug	Standard	0	0	Drug	RxNorm	1
19027033	203911	Albuterol 2 MG Oral Tablet [Asmaven]	Branded Drug	Standard	0	0	Drug	RxNorm	1
19027032	203910	Albuterol 2 MG Oral Tablet [Cobutolin]	Branded Drug	Standard	0	0	Drug	RxNorm	1
19027031	203909	Albuterol 2 MG Oral Tablet [Salbuvent]	Branded Drug	Standard	0	0	Drug	RxNorm	1
19017862	153742	Albuterol 8 MG Extended Release Oral Capsule	Clinical Drug	Standard	0	0	Drug	RxNorm	1
19017861	153741	Albuterol 4 MG Extended Release Oral Capsule	Clinical Drug	Standard	0	0	Drug	RxNorm	1
19004168	104536	bambuterol 20 MG Oral Tablet	Clinical Drug	Standard	0	0	Drug	RxNorm	1
19004167	104535	bambuterol 10 MG Oral Tablet	Clinical Drug	Standard	0	0	Drug	RxNorm	1
19004085	104502	Albuterol 8 MG Extended Release Oral Tablet [Ventolin]	Branded Drug	Standard	0	0	Drug	RxNorm	1
19004084	104501	Albuterol 4 MG Extended Release Oral Tablet [Ventolin]	Branded Drug	Standard	0	0	Drug	RxNorm	1
19000910	102380	Albuterol 4 MG Oral Tablet [Salbulin]	Branded Drug	Standard	0	0	Drug	RxNorm	1
19000909	102379	Albuterol 2 MG Oral Tablet [Salbulin]	Branded Drug	Standard	0	0	Drug	RxNorm	1
19000908	102378	Albuterol 4 MG Oral Tablet [Ventolin]	Branded Drug	Standard	0	0	Drug	RxNorm	1
19000907	102377	Albuterol 2 MG Oral Tablet [Ventolin]	Branded Drug	Standard	0	0	Drug	RxNorm	1
1154620	746189	12 HR Albuterol 4 MG Extended Release Oral Tablet [Proventil]	Quant Branded Drug	Standard	0	0	Drug	RxNorm	1
1154537	351957	Albuterol 8 MG Extended Release Oral Tablet [Vospire]	Branded Drug	Standard	0	0	Drug	RxNorm	1
1154379	213818	12 HR Albuterol 4 MG Extended Release Oral Tablet [Volmax]	Quant Branded Drug	Standard	0	0	Drug	RxNorm	1
1154378	213816	12 HR Albuterol 8 MG Extended Release Oral Tablet [Volmax]	Quant Branded Drug	Standard	0	0	Drug	RxNorm	1
1154376	213799	Albuterol 2 MG Oral Tablet [Proventil]	Branded Drug	Standard	0	0	Drug	RxNorm	1

## Sheet: ConceptIDs_schiz
	Id	Code	Name	Class	Standard Concept Caption	RC	DRC	Domain	Vocabulary	Ancestors
	40480879	441833000	Lethal catatonia	Clinical Finding	Standard	0	0	Condition	SNOMED	1
	35610094	1089481000000100	Cataleptic schizophrenia	Clinical Finding	Standard	0	0	Condition	SNOMED	1
	4321694	7025000	Subchronic undifferentiated schizophrenia with acute exacerbations	Clinical Finding	Standard	0	0	Condition	SNOMED	1
	4310121	85861002	Subchronic undifferentiated schizophrenia	Clinical Finding	Standard	0	0	Condition	SNOMED	1
	4244059	38295006	Involutional paraphrenia	Clinical Finding	Standard	0	0	Condition	SNOMED	1
	4219539	416340002	Late onset schizophrenia	Clinical Finding	Standard	0	0	Condition	SNOMED	1
	4213979	39610001	Undifferentiated schizophrenia in remission	Clinical Finding	Standard	0	0	Condition	SNOMED	1
	4194671	79204003	Chronic undifferentiated schizophrenia with acute exacerbations	Clinical Finding	Standard	0	0	Condition	SNOMED	1
	4105330	29599000	Chronic undifferentiated schizophrenia	Clinical Finding	Standard	225	225	Condition	SNOMED	1
	4102660	191577003	Cenesthopathic schizophrenia	Clinical Finding	Standard	0	0	Condition	SNOMED	1
	4100366	191531007	Acute exacerbation of chronic schizophrenia	Clinical Finding	Standard	121	220	Condition	SNOMED	1
	4100365	191526005	Schizophrenic disorders	Clinical Finding	Standard	0	0	Condition	SNOMED	1
	4085662	247804008	Schizophrenic prodrome	Clinical Finding	Standard	0	0	Condition	SNOMED	1
	4008566	111484002	Undifferentiated schizophrenia	Clinical Finding	Standard	2613	2838	Condition	SNOMED	1
	444396	70814008	Subchronic residual schizophrenia with acute exacerbations	Clinical Finding	Standard	0	0	Condition	SNOMED	1
	441828	35252006	Disorganized schizophrenia	Clinical Finding	Standard	695	786	Condition	SNOMED	1
	441538	68995007	Chronic catatonic schizophrenia	Clinical Finding	Standard	0	0	Condition	SNOMED	1
	440686	51133006	Residual schizophrenia in remission	Clinical Finding	Standard	0	0	Condition	SNOMED	1
	440373	16990005	Subchronic schizophrenia	Clinical Finding	Standard	14	251	Condition	SNOMED	1
	440368	12939007	Chronic disorganized schizophrenia	Clinical Finding	Standard	28	91	Condition	SNOMED	1
	439275	191547009	Acute exacerbation of subchronic catatonic schizophrenia	Clinical Finding	Standard	0	0	Condition	SNOMED	1
	439274	191563001	Acute exacerbation of subchronic latent schizophrenia	Clinical Finding	Standard	0	0	Condition	SNOMED	1
	439004	26025008	Residual schizophrenia	Clinical Finding	Standard	232	446	Condition	SNOMED	1
	438724	27387000	Subchronic disorganized schizophrenia	Clinical Finding	Standard	0	0	Condition	SNOMED	1
	437243	191555002	Acute exacerbation of chronic paranoid schizophrenia	Clinical Finding	Standard	99	99	Condition	SNOMED	1
	436947	31373002	Disorganized schizophrenia in remission	Clinical Finding	Standard	0	0	Condition	SNOMED	1
	436944	31658008	Chronic paranoid schizophrenia	Clinical Finding	Standard	635	734	Condition	SNOMED	1
	436673	71103003	Chronic residual schizophrenia	Clinical Finding	Standard	206	214	Condition	SNOMED	1
	436385	35218008	Chronic disorganized schizophrenia with acute exacerbations	Clinical Finding	Standard	63	63	Condition	SNOMED	1
	436384	14291003	Subchronic disorganized schizophrenia with acute exacerbations	Clinical Finding	Standard	0	0	Condition	SNOMED	1
	436071	191548004	Acute exacerbation of chronic catatonic schizophrenia	Clinical Finding	Standard	0	0	Condition	SNOMED	1
	436067	191527001	Simple schizophrenia	Clinical Finding	Standard	148	619	Condition	SNOMED	1
	435783	58214004	Schizophrenia	Clinical Finding	Standard	45197	66479	Condition	SNOMED	0
	435782	83746006	Chronic schizophrenia	Clinical Finding	Standard	8	1393	Condition	SNOMED	1
	435219	4926007	Schizophrenia in remission	Clinical Finding	Standard	25	45	Condition	SNOMED	1
	435218	30336007	Chronic residual schizophrenia with acute exacerbations	Clinical Finding	Standard	8	8	Condition	SNOMED	1
	435217	63181006	Paranoid schizophrenia in remission	Clinical Finding	Standard	20	20	Condition	SNOMED	1
	434901	191554003	Acute exacerbation of subchronic paranoid schizophrenia	Clinical Finding	Standard	7	7	Condition	SNOMED	1
	434332	111483008	Catatonic schizophrenia in remission	Clinical Finding	Standard	0	0	Condition	SNOMED	1
	434318	26472000	Paraphrenia	Clinical Finding	Standard	7	7	Condition	SNOMED	1
	433996	191542003	Catatonic schizophrenia	Clinical Finding	Standard	1420	1420	Condition	SNOMED	1
	433990	42868002	Subchronic catatonic schizophrenia	Clinical Finding	Standard	0	0	Condition	SNOMED	1
	433450	64905009	Paranoid schizophrenia	Clinical Finding	Standard	14478	15469	Condition	SNOMED	1
	433442	76566000	Subchronic residual schizophrenia	Clinical Finding	Standard	0	0	Condition	SNOMED	1
	432864	268617001	Acute schizophrenic episode	Clinical Finding	Standard	0	0	Condition	SNOMED	1
	432598	111482003	Subchronic schizophrenia with acute exacerbations	Clinical Finding	Standard	0	7	Condition	SNOMED	1
	432299	79866005	Subchronic paranoid schizophrenia	Clinical Finding	Standard	230	237	Condition	SNOMED	1
