# Supplementary material for: Beta-2 adrenergic receptor agonism alters astrocyte phagocytic activity and has potential applications to psychiatric disease
Source: Research Square preprint supplement (doi:10.21203/rs.3.rs-2086278/v1), 2022-10-25
Supplement: Supplementary file 3 [file 2cd8fb615cb565c31db1aa91.xlsx]

## Sheet: How to understand this
First, pay most attention to the "LOPAC Results" and "MS Results" tabs--these are the analyzed/normalized data. If you want to see th dose reponse data for each drug (each drug was tested at 5 concentrationsin singlicate), see the "Well Data" tab. Each drug is identifed by the STF ID.
Each row is a compound
This is what each collumns means, with the most important columns highlighted:
Row ID	Compound Plate	Assay Plate	Corp_ID	Sample_ID	Mean % Pos	Mean %Inh	MolName	activity	toxicity	PAINS	* Additional compound annotationos
Where the compounds are located in the library	" "	" "	Stanford-assigned ID of each drug	" "	% of live cell area that engulfed synaptosomes, normalized to control	% cell viability, live cell area normalized to controls	compound name	inactive, increase, or decrease phagocytosis	toxic or nontoxic	Undetected pan-assay interference compounds	Additional annotations to right

## Sheet: Analysis Explanation
Column	Plate Data
F	High	Median total cells in High Control (no compound)
I	Low	Median total cells in Low Control (no cells and no compound)
M	Med %Pos W2/W1	% Phagocytosis Integrated Intensity in positive cells adjusted for total Calcein AM signal
N	Med Pos Cells	Median number of phagocytosis cells per well
O	Med Pos W2 Int Int Data	Median Phagocytosis integrated intensity of Data wells
P	Med W1 Int Int Data	Median Calcein AM integrated intensity of Data wells
Column	Well Data
N	Pos Cells W2 Int Int	Positive Cells W2 Integrated Intensity (CellScoring) = pHrodoRed signal w/in Calcein AM	See IXMicro Analysis Example
O	All Cells W1 Int Int	All Nuclei W1 Integrated Intensity (CellScoring)= Calcein AM total signal	See IXMicro Analysis Example
P	Total Cells	Total Cells (CellScoring)	See IXMicro Analysis Example
Q	Pos Cells	Positive Cells (CellScoring) (cells with pHrodoRed signal w/in Calcein AM)	See IXMicro Analysis Example
R	% Pos W2/W1	Column N/Column O *100	% phagocytosis signal adjusted for Calcein AM signal
N	%Pos W2/Med	Column N/Plate Data Column Q *100	100=no change, <70=decrease Phagocytosis, >130 increase Phagocytosis
O	%Inh Cells/High	(1- (Column P/Plate Data Column P))*100, essentially measure of toxicity	0=not toxic, >30 potentially toxic, <-30 increases cell number?
P	%Pos Cells	Column Q/Column P *100	% Cells with Phagocytosis signal
Column	Results
H	Mean % Pos	Mean when [Conc]>5 uM of %Pos W2/Med	Measure of phagocytosis. 100=no change, <70=decrease Phagocytosis, >130 increase Phagocytosis
I	Mean %Inh	Mean when [Conc]>5 uM of %Inh Cells/High	Assess toxicity as decrease in live cells. 0=not toxic, >30 potentially toxic, <-30 increases cell number

## Sheet: Plate Data
Row	Cpd Plate	Assay Plate	Read_ID	High	Stdev	CV	Low	Stdev	CV	Z'	Med %Pos W2/W1	Med Pos Cells	Med Pos W2 Int Int Data	Med W1 Int Int Data	Date	Cell Line	Ligand	Comments
Row 1	LP01-302-0_625	SP190705_01	8397	282	21	7.4	9.5	3.5	36.7	0.731	1.5	44	7045462	472390720	2019-07-09	Human fetal astrocytes	Synaptosomes pHrodo red
Row 2	LP01-302-1_25	SP190705_02	8396	341	31.8	9.3	8.5	3.1	36.7	0.685	1.29	56	10336963	810190400	2019-07-09	Human fetal astrocytes	Synaptosomes pHrodo red
Row 3	LP01-302-2_5	SP190705_03	8392	118.5	15.2	12.8	10	3.2	31.7	0.492	15.56	44	4446280	28820827	2019-07-09	Human fetal astrocytes	Synaptosomes pHrodo red
Row 4	LP01-302-5_0	SP190705_04	8390	119.5	11.9	9.9	8	4.6	57.2	0.557	13.71	40	4067398	29736505	2019-07-09	Human fetal astrocytes	Synaptosomes pHrodo red
Row 5	LP01-302-10_0	SP190705_05	8389	141.5	13.2	9.3	8.5	3.2	37.5	0.631	13.23	41	4604990	34858510	2019-07-09	Human fetal astrocytes	Synaptosomes pHrodo red
Row 6	LP05-302-0_625	SP190705_06	8411	129.5	13	10	10	3	30.1	0.599	13.22	39	4577296	34330486	2019-07-09	Human fetal astrocytes	Synaptosomes pHrodo red
Row 7	LP05-302-1_25	SP190705_07	8410	125	15.5	12.4	8	3.6	44.5	0.512	12.52	40	4654825	36809550	2019-07-09	Human fetal astrocytes	Synaptosomes pHrodo red
Row 8	LP05-302-2_5	SP190705_08	8409	131	14.1	10.7	9.5	4.5	47.5	0.541	12.31	38	4431386	35705436	2019-07-09	Human fetal astrocytes	Synaptosomes pHrodo red
Row 9	LP05-302-5_0	SP190705_09	8408	119.5	13.5	11.3	8	2.7	33.4	0.566	11.64	36	4260450	36023942	2019-07-09	Human fetal astrocytes	Synaptosomes pHrodo red
Row 10	LP05-302-10_0	SP190705_10	8407	135	14	10.4	10	2.4	24.1	0.607	11.65	39	4517069	38330226	2019-07-09	Human fetal astrocytes	Synaptosomes pHrodo red
Row 11	LP09-302-0_625	SP190705_11	8406	113.5	16	14.1	8	3.9	48.3	0.436	11.37	35	3834265	33742350	2019-07-10	Human fetal astrocytes	Synaptosomes pHrodo red
Row 12	LP09-302-1_25	SP190705_12	8405	120.5	13.8	11.4	10	4.4	44.1	0.506	11.09	32	3562550	32048523	2019-07-10	Human fetal astrocytes	Synaptosomes pHrodo red
Row 13	LP09-302-2_5	SP190705_13	8404	114.5	12	10.5	8	3	37.1	0.577	10.43	28	3093146	29794681	2019-07-10	Human fetal astrocytes	Synaptosomes pHrodo red
Row 14	LP09-302-5_0	SP190705_14	8403	115	13.3	11.5	10	2.4	24.5	0.551	11.19	30	3340829	30015435	2019-07-10	Human fetal astrocytes	Synaptosomes pHrodo red
Row 15	LP09-302-10_0	SP190705_15	8402	115	11.5	10	8	4.9	60.7	0.54	10.4	26	2881370	27689838	2019-07-10	Human fetal astrocytes	Synaptosomes pHrodo red
Row 16	LP13-302-0_625	SP190705_16	8400	170.5	16.3	9.6	9.5	3.5	36.7	0.631	7.8	56	6879968	88366904	2019-07-10	Human fetal astrocytes	Synaptosomes pHrodo red
Row 17	LP13-302-1_25	SP190705_17	8399	175.5	25.3	14.4	8.5	3.1	36.7	0.49	8.29	61	7924635	96288304	2019-07-10	Human fetal astrocytes	Synaptosomes pHrodo red
Row 18	LP13-302-2_5	SP190705_18	8398	188	19.4	10.3	10	3.2	31.7	0.619	7.91	62	7960496	100814464	2019-07-10	Human fetal astrocytes	Synaptosomes pHrodo red
Row 19	LP13-302-5_0	SP190705_19	8413	138.5	18	13	8	4.6	57.2	0.481	6.12	47	5430188	87563240	2019-07-10	Human fetal astrocytes	Synaptosomes pHrodo red
Row 20	LP13-302-10_0	SP190705_20	8412	130	23.2	17.8	8.5	3.2	37.5	0.349	5.79	45	5098987	90101192	2019-07-10	Human fetal astrocytes	Synaptosomes pHrodo red
Row 1	MS-01-302-0_625	SP190705_21	8437	130	18.2	14	9.5	3.5	36.7	0.461	6.14	44	5063474	83511520	2019-07-10	Human fetal astrocytes	Synaptosomes pHrodo red
Row 2	MS-01-302-1_25	SP190705_22	8445	172.5	25.2	14.6	8.5	3.1	36.7	0.483	6.79	57	7256200	108802892	2019-07-10	Human fetal astrocytes	Synaptosomes pHrodo red
Row 3	MS-01-302-2_5	SP190705_23	8444	176.5	12.4	7	10	3.2	31.7	0.72	6.95	58	7195942	104620224	2019-07-10	Human fetal astrocytes	Synaptosomes pHrodo red
Row 4	MS-01-302-5_0	SP190705_24	8436	136	15.6	11.5	8	4.6	57.2	0.526	6.02	45	5129960	84673244	2019-07-10	Human fetal astrocytes	Synaptosomes pHrodo red
Row 5	MS-01-302-10_0	SP190705_25	8443	185	19.7	10.6	8.5	3.2	37.5	0.612	7.27	57	7392185	101152508	2019-07-10	Human fetal astrocytes	Synaptosomes pHrodo red
Row 6	MS-05-302-0_625	SP190705_26	8442	178.5	26.3	14.7	10	3	30.1	0.479	7.12	58	7493938	104831396	2019-07-10	Human fetal astrocytes	Synaptosomes pHrodo red
Row 7	MS-05-302-1_25	SP190705_27	8441	155.5	23.4	15	8	3.6	44.5	0.452	6.19	54	6939328	110072524	2019-07-10	Human fetal astrocytes	Synaptosomes pHrodo red
Row 8	MS-05-302-2_5	SP190705_28	8440	153	22	14.4	9.5	4.5	47.5	0.445	5.53	52	6132475	110732216	2019-07-10	Human fetal astrocytes	Synaptosomes pHrodo red
Row 9	MS-05-302-5_0	SP190705_29	8439	181.5	25.5	14	8	2.7	33.4	0.514	8.27	63	8651195	104116840	2019-07-10	Human fetal astrocytes	Synaptosomes pHrodo red
Row 10	MS-05-302-10_0	SP190705_30	8438	174.5	26.6	15.2	10	2.4	24.1	0.471	9.1	66	8715483	96634880	2019-07-10	Human fetal astrocytes	Synaptosomes pHrodo red
Row 11	MS-09-302-0_625	SP190705_31	8434	132	25.3	19.2	8	3.9	48.3	0.295	4.76	33	4600528	100162996	2019-07-11	Human fetal astrocytes	Synaptosomes pHrodo red
Row 12	MS-09-302-1_25	SP190705_32	8433	136	31.6	23.2	10	4.4	44.1	0.142	4.47	35	4827165	110962180	2019-07-11	Human fetal astrocytes	Synaptosomes pHrodo red
Row 13	MS-09-302-2_5	SP190705_33	8435	169	26.9	15.9	8	3	37.1	0.443	4.97	34	4744692	95233856	2019-07-11	Human fetal astrocytes	Synaptosomes pHrodo red
Row 14	MS-09-302-5_0	SP190705_34	8432	162.5	14.8	9.1	10	2.4	24.5	0.661	4.75	32	4697257	92882436	2019-07-11	Human fetal astrocytes	Synaptosomes pHrodo red
Row 15	MS-09-302-10_0	SP190705_35	8431	168.5	16	9.5	8	4.9	60.7	0.609	4.17	32	4576525	108949080	2019-07-11	Human fetal astrocytes	Synaptosomes pHrodo red
Row 1	MS-13-302-0_625	SP190705_36	8430	147.5	22.8	15.5	9.5	3.5	36.7	0.429	4.16	32	4645808	109426904	2019-07-11	Human fetal astrocytes	Synaptosomes pHrodo red
Row 2	MS-13-302-1_25	SP190705_37	8429	159	31.3	19.7	8.5	3.1	36.7	0.315	4.48	32	4561280	101780212	2019-07-11	Human fetal astrocytes	Synaptosomes pHrodo red
Row 3	MS-13-302-2_5	SP190705_38	8428	141	41.5	29.4	10	3.2	31.7	-0.023	4.86	30.5	4327841	84013304	2019-07-11	Human fetal astrocytes	Synaptosomes pHrodo red
Row 4	MS-13-302-5_0	SP190705_39	8427	163	25.6	15.7	8	4.6	57.2	0.415	4.91	31	4193810	77667748	2019-07-11	Human fetal astrocytes	Synaptosomes pHrodo red
Row 5	MS-13-302-10_0	SP190705_40	8426	143.5	21.7	15.1	8.5	3.2	37.5	0.447	4.44	27	3866941	86485648	2019-07-11	Human fetal astrocytes	Synaptosomes pHrodo red
Row 6	MS-17-302-0_625	SP190705_41	8425	132	25.7	19.4	10	3	30.1	0.295	4.34	28	4032503	90699920	2019-07-11	Human fetal astrocytes	Synaptosomes pHrodo red
Row 7	MS-17-302-1_25	SP190705_42	8424	146.5	18.6	12.7	8	3.6	44.5	0.52	4.33	28	4122092	95622244	2019-07-11	Human fetal astrocytes	Synaptosomes pHrodo red
Row 8	MS-17-302-2_5	SP190705_43	8423	146	20.6	14.1	9.5	4.5	47.5	0.449	4.38	28	4082605	90082960	2019-07-11	Human fetal astrocytes	Synaptosomes pHrodo red
Row 9	MS-17-302-5_0	SP190705_44	8422	156	16.7	10.7	8	2.7	33.4	0.608	4.04	26	3674275	91522408	2019-07-11	Human fetal astrocytes	Synaptosomes pHrodo red
Row 10	MS-17-302-10_0	SP190705_45	8421	145	31.8	21.9	10	2.4	24.1	0.241	3.39	21	3172756	90899124	2019-07-11	Human fetal astrocytes	Synaptosomes pHrodo red
Row 11	MS-21-302-0_625	SP190705_46	8420	146.5	14.1	9.6	8	3.9	48.3	0.61	3.57	22	3249977	90073584	2019-07-11	Human fetal astrocytes	Synaptosomes pHrodo red
Row 12	MS-21-302-1_25	SP190705_47	8419	148.5	19.3	13	10	4.4	44.1	0.486	3.43	22	3263891	92770176	2019-07-11	Human fetal astrocytes	Synaptosomes pHrodo red
Row 13	MS-21-302-2_5	SP190705_48	8418	146	23.3	16	8	3	37.1	0.428	3.49	21	3155992	91142172	2019-07-11	Human fetal astrocytes	Synaptosomes pHrodo red
Row 14	MS-21-302-5_0	SP190705_49	8417	129.5	24.6	19	10	2.4	24.5	0.32	3.56	20.5	3098649	87429548	2019-07-11	Human fetal astrocytes	Synaptosomes pHrodo red
Row 15	MS-21-302-10_0	SP190705_50	8416	140	20.4	14.5	8	4.9	60.7	0.427	3.3	18	2901892	86681116	2019-07-11	Human fetal astrocytes	Synaptosomes pHrodo red

## Sheet: Well Data
Row	Cpd Plate	Assay Plate	Read_ID	R	C	Well type	Dil	uM	ug/ml	Date	STF_ID	Sample_ID	Pos Cells W2 Int Int	All Cells W1 Int Int	Total Cells	Pos Cells	% Pos W2/W1	%Pos W2/Med	%Inh Cells/High	%Pos Cells	Cell Line	Ligand
Row 1	LP01-302-0_625	SP190705_01	8397	1	1	High Control				2019-07-09			6582685	296303232	241	45	2.22	147.8	15	18.7	Human fetal astrocytes	Synaptosomes pHrodo red
Row 2	LP01-302-0_625	SP190705_01	8397	1	2	High Control				2019-07-09			5959859	349293632	289	45	1.71	113.5	-2.6	15.6	Human fetal astrocytes	Synaptosomes pHrodo red
Row 3	LP01-302-0_625	SP190705_01	8397	1	3	Data	450	1.39	0.27	2019-07-09	STF-001001	STF-001001-1	4807189	371701216	293	35	1.29	86	-4	11.9	Human fetal astrocytes	Synaptosomes pHrodo red
Row 4	LP01-302-0_625	SP190705_01	8397	1	4	Data	450	1.39	0.23	2019-07-09	STF-001081	STF-001081-1	7466609	470459808	340	50	1.59	105.6	-21.3	14.7	Human fetal astrocytes	Synaptosomes pHrodo red
Row 5	LP01-302-0_625	SP190705_01	8397	1	5	Data	450	1.39	0.28	2019-07-09	STF-001002	STF-001002-1	7534807	461385984	306	42	1.63	108.6	-8.8	13.7	Human fetal astrocytes	Synaptosomes pHrodo red
Row 6	LP01-302-0_625	SP190705_01	8397	1	6	Data	450	1.39	0.18	2019-07-09	STF-001082	STF-001082-1	6942552	488849888	352	47	1.42	94.5	-25.7	13.4	Human fetal astrocytes	Synaptosomes pHrodo red
Row 7	LP01-302-0_625	SP190705_01	8397	1	7	Data	450	1.39	0.08	2019-07-09	STF-001003	STF-001003-1	6324716	436332064	327	50	1.45	96.4	-16.5	15.3	Human fetal astrocytes	Synaptosomes pHrodo red
Row 8	LP01-302-0_625	SP190705_01	8397	1	8	Data	450	1.39	0.29	2019-07-09	STF-001083	STF-001083-1	7235790	472636288	305	48	1.53	101.8	-8.4	15.7	Human fetal astrocytes	Synaptosomes pHrodo red
Row 9	LP01-302-0_625	SP190705_01	8397	1	9	Data	450	1.39	0.26	2019-07-09	STF-001004	STF-001004-1	9267855	503902752	321	55	1.84	122.3	-14.3	17.1	Human fetal astrocytes	Synaptosomes pHrodo red
Row 10	LP01-302-0_625	SP190705_01	8397	1	10	Data	450	1.39	0.46	2019-07-09	STF-001084	STF-001084-1	7313566	476848384	317	43	1.53	102	-12.8	13.6	Human fetal astrocytes	Synaptosomes pHrodo red
Row 11	LP01-302-0_625	SP190705_01	8397	1	11	Data	450	1.39	0.14	2019-07-09	STF-001005	STF-001005-1	5961397	461498112	293	37	1.29	85.9	-4	12.6	Human fetal astrocytes	Synaptosomes pHrodo red
Row 12	LP01-302-0_625	SP190705_01	8397	1	12	Data	450	1.39	0.23	2019-07-09	STF-001085	STF-001085-1	8155565	547925824	318	52	1.49	99	-13.2	16.4	Human fetal astrocytes	Synaptosomes pHrodo red
Row 13	LP01-302-0_625	SP190705_01	8397	1	13	Data	450	1.39	0.24	2019-07-09	STF-001006	STF-001006-1	6487108	513453024	343	47	1.26	84	-22.4	13.7	Human fetal astrocytes	Synaptosomes pHrodo red
Row 14	LP01-302-0_625	SP190705_01	8397	1	14	Data	450	1.39	0.41	2019-07-09	STF-001086	STF-001086-1	5375169	504346944	332	30	1.07	70.9	-18.3	9	Human fetal astrocytes	Synaptosomes pHrodo red
Row 15	LP01-302-0_625	SP190705_01	8397	1	15	Data	450	1.39	0.3	2019-07-09	STF-001007	STF-001007-1	5175952	567843008	361	37	0.91	60.6	-29	10.2	Human fetal astrocytes	Synaptosomes pHrodo red
Row 16	LP01-302-0_625	SP190705_01	8397	1	16	Data	450	1.39	0.52	2019-07-09	STF-001087	STF-001087-1	8189946	583411904	370	42	1.4	93.4	-32.3	11.4	Human fetal astrocytes	Synaptosomes pHrodo red
Row 17	LP01-302-0_625	SP190705_01	8397	1	17	Data	450	1.39	0.31	2019-07-09	STF-001008	STF-001008-1	9669134	559332352	372	66	1.73	115	-33	17.7	Human fetal astrocytes	Synaptosomes pHrodo red
Row 18	LP01-302-0_625	SP190705_01	8397	1	18	Data	450	1.39	0.45	2019-07-09	STF-001088	STF-001088-1	8169710	617882496	369	51	1.32	88	-31.9	13.8	Human fetal astrocytes	Synaptosomes pHrodo red
Row 19	LP01-302-0_625	SP190705_01	8397	1	19	Data	450	1.39	0.44	2019-07-09	STF-001009	STF-001009-1	7965996	472145152	306	42	1.69	112.2	-8.8	13.7	Human fetal astrocytes	Synaptosomes pHrodo red
Row 20	LP01-302-0_625	SP190705_01	8397	1	20	Data	450	1.39	0.2	2019-07-09	STF-001089	STF-001089-1	4879459	461699296	299	33	1.06	70.3	-6.2	11	Human fetal astrocytes	Synaptosomes pHrodo red
Row 21	LP01-302-0_625	SP190705_01	8397	1	21	Data	450	1.39	0.54	2019-07-09	STF-001010	STF-001010-1	6765322	529805440	333	38	1.28	84.9	-18.7	11.4	Human fetal astrocytes	Synaptosomes pHrodo red
Row 22	LP01-302-0_625	SP190705_01	8397	1	22	Data	450	1.39	0.14	2019-07-09	STF-001090	STF-001090-1	8178024	530538048	326	53	1.54	102.5	-16.1	16.3	Human fetal astrocytes	Synaptosomes pHrodo red
Row 23	LP01-302-0_625	SP190705_01	8397	1	23	Positive Control				2019-07-09			0	336149632	209	0	0	0	26.8	0	Human fetal astrocytes	None
Row 24	LP01-302-0_625	SP190705_01	8397	1	24	Low Control				2019-07-09			0	632062	2	0	0	0	102.8	0	Human fetal astrocytes	Synaptosomes pHrodo red
Row 25	LP01-302-0_625	SP190705_01	8397	2	1	High Control				2019-07-09			7195998	304869920	275	51	2.36	157	2.6	18.5	Human fetal astrocytes	Synaptosomes pHrodo red
Row 26	LP01-302-0_625	SP190705_01	8397	2	2	High Control				2019-07-09			6548338	374030272	300	51	1.75	116.5	-6.6	17	Human fetal astrocytes	Synaptosomes pHrodo red
Row 27	LP01-302-0_625	SP190705_01	8397	2	3	Data	450	1.39	0.34	2019-07-09	STF-001161	STF-001161-1	8500669	360620096	281	48	2.36	156.8	0.4	17.1	Human fetal astrocytes	Synaptosomes pHrodo red
Row 28	LP01-302-0_625	SP190705_01	8397	2	4	Data	450	1.39	0.53	2019-07-09	STF-001240	STF-001240-1	6494676	406480256	309	44	1.6	106.3	-9.9	14.2	Human fetal astrocytes	Synaptosomes pHrodo red
Row 29	LP01-302-0_625	SP190705_01	8397	2	5	Data	450	1.39	0.51	2019-07-09	STF-001162	STF-001162-1	6051115	423308032	316	49	1.43	95.1	-12.5	15.5	Human fetal astrocytes	Synaptosomes pHrodo red
Row 30	LP01-302-0_625	SP190705_01	8397	2	6	Data	450	1.39	1.67	2019-07-09	STF-001241	STF-001241-1	6976675	464731808	321	45	1.5	99.9	-14.3	14	Human fetal astrocytes	Synaptosomes pHrodo red
Row 31	LP01-302-0_625	SP190705_01	8397	2	7	Data	450	1.39	0.3	2019-07-09	STF-001163	STF-001163-1	7488352	423105056	282	51	1.77	117.7	0	18.1	Human fetal astrocytes	Synaptosomes pHrodo red
Row 32	LP01-302-0_625	SP190705_01	8397	2	8	Data	450	1.39	0.25	2019-07-09	STF-001242	STF-001242-1	7516496	441026176	321	52	1.7	113.4	-14.3	16.2	Human fetal astrocytes	Synaptosomes pHrodo red
Row 33	LP01-302-0_625	SP190705_01	8397	2	9	Data	450	1.39	0.39	2019-07-09	STF-001164	STF-001164-1	3889804	316547872	262	29	1.23	81.7	7.3	11.1	Human fetal astrocytes	Synaptosomes pHrodo red
Row 34	LP01-302-0_625	SP190705_01	8397	2	10	Data	450	1.39	0.48	2019-07-09	STF-001243	STF-001243-1	7158819	478152352	318	49	1.5	99.6	-13.2	15.4	Human fetal astrocytes	Synaptosomes pHrodo red
Row 35	LP01-302-0_625	SP190705_01	8397	2	11	Data	450	1.39	0.58	2019-07-09	STF-001165	STF-001165-1	8922916	475551680	300	55	1.88	124.8	-6.6	18.3	Human fetal astrocytes	Synaptosomes pHrodo red
Row 36	LP01-302-0_625	SP190705_01	8397	2	12	Data	450	1.39	0.37	2019-07-09	STF-001244	STF-001244-1	7217975	521043904	353	47	1.39	92.1	-26.1	13.3	Human fetal astrocytes	Synaptosomes pHrodo red
Row 37	LP01-302-0_625	SP190705_01	8397	2	13	Data	450	1.39	0.38	2019-07-09	STF-001166	STF-001166-1	8342472	570840448	345	58	1.46	97.2	-23.1	16.8	Human fetal astrocytes	Synaptosomes pHrodo red
Row 38	LP01-302-0_625	SP190705_01	8397	2	14	Data	450	1.39	0.45	2019-07-09	STF-001245	STF-001245-1	5337272	509608832	333	33	1.05	69.7	-18.7	9.9	Human fetal astrocytes	Synaptosomes pHrodo red
Row 39	LP01-302-0_625	SP190705_01	8397	2	15	Data	450	1.39	0.32	2019-07-09	STF-001167	STF-001167-1	8506846	550417984	335	49	1.55	102.8	-19.4	14.6	Human fetal astrocytes	Synaptosomes pHrodo red
Row 40	LP01-302-0_625	SP190705_01	8397	2	16	Data	450	1.39	0.61	2019-07-09	STF-001246	STF-001246-1	5943000	537180992	349	42	1.11	73.6	-24.6	12	Human fetal astrocytes	Synaptosomes pHrodo red
Row 41	LP01-302-0_625	SP190705_01	8397	2	17	Data	450	1.39	0.4	2019-07-09	STF-001168	STF-001168-1	7296511	543571584	338	47	1.34	89.3	-20.6	13.9	Human fetal astrocytes	Synaptosomes pHrodo red
Row 42	LP01-302-0_625	SP190705_01	8397	2	18	Data	450	1.39	0.27	2019-07-09	STF-001247	STF-001247-1	8870496	530096672	328	50	1.67	111.3	-16.9	15.2	Human fetal astrocytes	Synaptosomes pHrodo red
Row 43	LP01-302-0_625	SP190705_01	8397	2	19	Data	450	1.39	0.41	2019-07-09	STF-001169	STF-001169-1	7694973	528192096	331	46	1.46	96.9	-18	13.9	Human fetal astrocytes	Synaptosomes pHrodo red
Row 44	LP01-302-0_625	SP190705_01	8397	2	20	Data	450	1.39	0.49	2019-07-09	STF-001248	STF-001248-1	6904629	542537856	325	43	1.27	84.7	-15.8	13.2	Human fetal astrocytes	Synaptosomes pHrodo red
Row 45	LP01-302-0_625	SP190705_01	8397	2	21	Data	450	1.39	0.49	2019-07-09	STF-001170	STF-001170-1	5549398	566067456	341	40	0.98	65.2	-21.7	11.7	Human fetal astrocytes	Synaptosomes pHrodo red
Row 46	LP01-302-0_625	SP190705_01	8397	2	22	Data	450	1.39	0.41	2019-07-09	STF-001249	STF-001249-1	3780432	381069472	221	15	0.99	66	22.4	6.8	Human fetal astrocytes	Synaptosomes pHrodo red
Row 47	LP01-302-0_625	SP190705_01	8397	2	23	Positive Control				2019-07-09			0	293796576	189	0	0	0	34.1	0	Human fetal astrocytes	None
Row 48	LP01-302-0_625	SP190705_01	8397	2	24	Low Control				2019-07-09			345578	2783804	12	6	12.41	825.7	99.1	50	Human fetal astrocytes	Synaptosomes pHrodo red
Row 49	LP01-302-0_625	SP190705_01	8397	3	1	High Control				2019-07-09			3924806	298742848	281	29	1.31	87.4	0.4	10.3	Human fetal astrocytes	Synaptosomes pHrodo red
Row 50	LP01-302-0_625	SP190705_01	8397	3	2	High Control				2019-07-09			5796996	333692992	255	32	1.74	115.6	9.9	12.5	Human fetal astrocytes	Synaptosomes pHrodo red
Row 51	LP01-302-0_625	SP190705_01	8397	3	3	Data	450	1.39	0.3	2019-07-09	STF-001011	STF-001011-1	5512067	328114272	281	38	1.68	111.7	0.4	13.5	Human fetal astrocytes	Synaptosomes pHrodo red
Row 52	LP01-302-0_625	SP190705_01	8397	3	4	Data	450	1.39	0.22	2019-07-09	STF-001091	STF-001091-1	6164389	402525152	284	38	1.53	101.9	-0.7	13.4	Human fetal astrocytes	Synaptosomes pHrodo red
Row 53	LP01-302-0_625	SP190705_01	8397	3	5	Data	450	1.39	0.6	2019-07-09	STF-001012	STF-001012-1	6557886	364506848	286	33	1.8	119.7	-1.5	11.5	Human fetal astrocytes	Synaptosomes pHrodo red
Row 54	LP01-302-0_625	SP190705_01	8397	3	6	Data	450	1.39	0.45	2019-07-09	STF-001092	STF-001092-1	4141367	387204928	300	29	1.07	71.1	-6.6	9.7	Human fetal astrocytes	Synaptosomes pHrodo red
Row 55	LP01-302-0_625	SP190705_01	8397	3	7	Data	450	1.39	0.49	2019-07-09	STF-001013	STF-001013-1	5615189	409965376	322	37	1.37	91.1	-14.7	11.5	Human fetal astrocytes	Synaptosomes pHrodo red
Row 56	LP01-302-0_625	SP190705_01	8397	3	8	Data	450	1.39	0.27	2019-07-09	STF-001093	STF-001093-1	6791652	365900608	282	47	1.86	123.5	0	16.7	Human fetal astrocytes	Synaptosomes pHrodo red
Row 57	LP01-302-0_625	SP190705_01	8397	3	9	Data	450	1.39	0.58	2019-07-09	STF-001014	STF-001014-1	7372637	454384736	297	44	1.62	107.9	-5.5	14.8	Human fetal astrocytes	Synaptosomes pHrodo red
Row 58	LP01-302-0_625	SP190705_01	8397	3	10	Data	450	1.39	0.44	2019-07-09	STF-001094	STF-001094-1	5825646	403290240	287	28	1.44	96.1	-1.8	9.8	Human fetal astrocytes	Synaptosomes pHrodo red
Row 59	LP01-302-0_625	SP190705_01	8397	3	11	Data	450	1.39	0.37	2019-07-09	STF-001015	STF-001015-1	10109522	448277984	291	59	2.26	150	-3.3	20.3	Human fetal astrocytes	Synaptosomes pHrodo red
Row 60	LP01-302-0_625	SP190705_01	8397	3	12	Data	450	1.39	0.51	2019-07-09	STF-001095	STF-001095-1	5921761	438992608	315	41	1.35	89.7	-12.1	13	Human fetal astrocytes	Synaptosomes pHrodo red
Row 61	LP01-302-0_625	SP190705_01	8397	3	13	Data	450	1.39	0.54	2019-07-09	STF-001016	STF-001016-1	8442576	489899200	304	54	1.72	114.6	-8.1	17.8	Human fetal astrocytes	Synaptosomes pHrodo red
Row 62	LP01-302-0_625	SP190705_01	8397	3	14	Data	450	1.39	0.53	2019-07-09	STF-001096	STF-001096-1	5101477	439767232	312	33	1.16	77.2	-11	10.6	Human fetal astrocytes	Synaptosomes pHrodo red
Row 63	LP01-302-0_625	SP190705_01	8397	3	15	Data	450	1.39	0.41	2019-07-09	STF-001017	STF-001017-1	6754256	506429600	344	45	1.33	88.7	-22.8	13.1	Human fetal astrocytes	Synaptosomes pHrodo red
Row 64	LP01-302-0_625	SP190705_01	8397	3	16	Data	450	1.39	0.24	2019-07-09	STF-001097	STF-001097-1	7369666	530302496	353	39	1.39	92.4	-26.1	11	Human fetal astrocytes	Synaptosomes pHrodo red
Row 65	LP01-302-0_625	SP190705_01	8397	3	17	Data	450	1.39	0.27	2019-07-09	STF-001018	STF-001018-1	5840783	473731008	311	34	1.23	82	-10.6	10.9	Human fetal astrocytes	Synaptosomes pHrodo red
Row 66	LP01-302-0_625	SP190705_01	8397	3	18	Data	450	1.39	0.24	2019-07-09	STF-001098	STF-001098-1	7101766	505451840	325	40	1.41	93.5	-15.8	12.3	Human fetal astrocytes	Synaptosomes pHrodo red
Row 67	LP01-302-0_625	SP190705_01	8397	3	19	Data	450	1.39	0.75	2019-07-09	STF-001019	STF-001019-1	7067863	549576128	342	42	1.29	85.5	-22	12.3	Human fetal astrocytes	Synaptosomes pHrodo red
Row 68	LP01-302-0_625	SP190705_01	8397	3	20	Data	450	1.39	0.2	2019-07-09	STF-001099	STF-001099-1	6145002	498506240	323	37	1.23	82	-15	11.5	Human fetal astrocytes	Synaptosomes pHrodo red
Row 69	LP01-302-0_625	SP190705_01	8397	3	21	Data	450	1.39	0.63	2019-07-09	STF-001020	STF-001020-1	7549032	561364992	347	50	1.34	89.5	-23.9	14.4	Human fetal astrocytes	Synaptosomes pHrodo red
Row 70	LP01-302-0_625	SP190705_01	8397	3	22	Data	450	1.39	0.53	2019-07-09	STF-001100	STF-001100-1	7653975	499734144	296	46	1.53	101.9	-5.1	15.5	Human fetal astrocytes	Synaptosomes pHrodo red
Row 71	LP01-302-0_625	SP190705_01	8397	3	23	Positive Control				2019-07-09			197338	288517536	165	2	0.07	4.5	42.9	1.2	Human fetal astrocytes	None
Row 72	LP01-302-0_625	SP190705_01	8397	3	24	Low Control				2019-07-09			482277	2899291	9	6	16.63	1106.5	100.2	66.7	Human fetal astrocytes	Synaptosomes pHrodo red
Row 73	LP01-302-0_625	SP190705_01	8397	4	1	High Control				2019-07-09			7189337	314700544	292	61	2.28	152	-3.7	20.9	Human fetal astrocytes	Synaptosomes pHrodo red
Row 74	LP01-302-0_625	SP190705_01	8397	4	2	High Control				2019-07-09			4989623	313634272	277	31	1.59	105.8	1.8	11.2	Human fetal astrocytes	Synaptosomes pHrodo red
Row 75	LP01-302-0_625	SP190705_01	8397	4	3	Data	450	1.39	1.04	2019-07-09	STF-001171	STF-001171-1	7154983	350553088	273	50	2.04	135.8	3.3	18.3	Human fetal astrocytes	Synaptosomes pHrodo red
Row 76	LP01-302-0_625	SP190705_01	8397	4	4	Data	450	1.39	0.44	2019-07-09	STF-001250	STF-001250-1	6696428	368742496	271	41	1.82	120.8	4	15.1	Human fetal astrocytes	Synaptosomes pHrodo red
Row 77	LP01-302-0_625	SP190705_01	8397	4	5	Data	450	1.39	0.21	2019-07-09	STF-001172	STF-001172-1	7047491	360681600	273	47	1.95	130	3.3	17.2	Human fetal astrocytes	Synaptosomes pHrodo red
Row 78	LP01-302-0_625	SP190705_01	8397	4	6	Data	450	1.39	0.14	2019-07-09	STF-001251	STF-001251-1	7989046	386924064	266	48	2.06	137.3	5.9	18	Human fetal astrocytes	Synaptosomes pHrodo red
Row 79	LP01-302-0_625	SP190705_01	8397	4	7	Data	450	1.39	0.46	2019-07-09	STF-001173	STF-001173-1	9033192	450046592	315	61	2.01	133.5	-12.1	19.4	Human fetal astrocytes	Synaptosomes pHrodo red
Row 80	LP01-302-0_625	SP190705_01	8397	4	8	Data	450	1.39	0.24	2019-07-09	STF-001252	STF-001252-1	7376657	401451552	288	57	1.84	122.2	-2.2	19.8	Human fetal astrocytes	Synaptosomes pHrodo red
Row 81	LP01-302-0_625	SP190705_01	8397	4	9	Data	450	1.39	0.6	2019-07-09	STF-001174	STF-001174-1	6141868	470261536	329	43	1.31	86.9	-17.2	13.1	Human fetal astrocytes	Synaptosomes pHrodo red
Row 82	LP01-302-0_625	SP190705_01	8397	4	10	Data	450	1.39	0.41	2019-07-09	STF-001253	STF-001253-1	8295616	495010368	314	58	1.68	111.5	-11.7	18.5	Human fetal astrocytes	Synaptosomes pHrodo red
Row 83	LP01-302-0_625	SP190705_01	8397	4	11	Data	450	1.39	0.46	2019-07-09	STF-001175	STF-001175-1	5700950	437200608	301	39	1.3	86.7	-7	13	Human fetal astrocytes	Synaptosomes pHrodo red
Row 84	LP01-302-0_625	SP190705_01	8397	4	12	Data	450	1.39	0.4	2019-07-09	STF-001254	STF-001254-1	9632741	485764128	335	60	1.98	131.9	-19.4	17.9	Human fetal astrocytes	Synaptosomes pHrodo red
Row 85	LP01-302-0_625	SP190705_01	8397	4	13	Data	450	1.39	0.64	2019-07-09	STF-001176	STF-001176-1	7920706	479823040	328	49	1.65	109.8	-16.9	14.9	Human fetal astrocytes	Synaptosomes pHrodo red
Row 86	LP01-302-0_625	SP190705_01	8397	4	14	Data	450	1.39	0.44	2019-07-09	STF-001255	STF-001255-1	8475239	464575488	278	50	1.82	121.3	1.5	18	Human fetal astrocytes	Synaptosomes pHrodo red
Row 87	LP01-302-0_625	SP190705_01	8397	4	15	Data	450	1.39	0.35	2019-07-09	STF-001177	STF-001177-1	8050709	510968704	317	49	1.58	104.8	-12.8	15.5	Human fetal astrocytes	Synaptosomes pHrodo red
Row 88	LP01-302-0_625	SP190705_01	8397	4	16	Data	450	1.39	0.51	2019-07-09	STF-001256	STF-001256-1	8450780	526327360	335	58	1.61	106.8	-19.4	17.3	Human fetal astrocytes	Synaptosomes pHrodo red
Row 89	LP01-302-0_625	SP190705_01	8397	4	17	Data	450	1.39	0.37	2019-07-09	STF-001178	STF-001178-1	5599691	435838528	305	31	1.28	85.5	-8.4	10.2	Human fetal astrocytes	Synaptosomes pHrodo red
Row 90	LP01-302-0_625	SP190705_01	8397	4	18	Data	450	1.39	0.56	2019-07-09	STF-001257	STF-001257-1	5281611	446860032	315	31	1.18	78.6	-12.1	9.8	Human fetal astrocytes	Synaptosomes pHrodo red
Row 91	LP01-302-0_625	SP190705_01	8397	4	19	Data	450	1.39	0.4	2019-07-09	STF-001179	STF-001179-1	6187020	509598816	312	39	1.21	80.8	-11	12.5	Human fetal astrocytes	Synaptosomes pHrodo red
Row 92	LP01-302-0_625	SP190705_01	8397	4	20	Data	450	1.39	0.77	2019-07-09	STF-001258	STF-001258-1	8721302	530543872	335	52	1.64	109.3	-19.4	15.5	Human fetal astrocytes	Synaptosomes pHrodo red
Row 93	LP01-302-0_625	SP190705_01	8397	4	21	Data	450	1.39	0.26	2019-07-09	STF-001180	STF-001180-1	4800885	464583040	299	32	1.03	68.7	-6.2	10.7	Human fetal astrocytes	Synaptosomes pHrodo red
Row 94	LP01-302-0_625	SP190705_01	8397	4	22	Data	450	1.39	0.64	2019-07-09	STF-001259	STF-001259-1	7456567	502509056	318	47	1.48	98.7	-13.2	14.8	Human fetal astrocytes	Synaptosomes pHrodo red
Row 95	LP01-302-0_625	SP190705_01	8397	4	23	Positive Control				2019-07-09			0	303956192	204	0	0	0	28.6	0	Human fetal astrocytes	None
Row 96	LP01-302-0_625	SP190705_01	8397	4	24	Low Control				2019-07-09			275406	1817136	6	3	15.16	1008.1	101.3	50	Human fetal astrocytes	Synaptosomes pHrodo red
Row 97	LP01-302-0_625	SP190705_01	8397	5	1	High Control				2019-07-09			4557735	301217088	275	32	1.51	100.6	2.6	11.6	Human fetal astrocytes	Synaptosomes pHrodo red
Row 98	LP01-302-0_625	SP190705_01	8397	5	2	High Control				2019-07-09			5919206	351597888	298	40	1.68	112	-5.9	13.4	Human fetal astrocytes	Synaptosomes pHrodo red
Row 99	LP01-302-0_625	SP190705_01	8397	5	3	Data	450	1.39	0.52	2019-07-09	STF-001021	STF-001021-1	7983066	453589376	330	54	1.76	117.1	-17.6	16.4	Human fetal astrocytes	Synaptosomes pHrodo red
Row 100	LP01-302-0_625	SP190705_01	8397	5	4	Data	450	1.39	0.28	2019-07-09	STF-001101	STF-001101-1	4095404	364961472	286	31	1.12	74.6	-1.5	10.8	Human fetal astrocytes	Synaptosomes pHrodo red
Row 101	LP01-302-0_625	SP190705_01	8397	5	5	Data	450	1.39	0.6	2019-07-09	STF-001022	STF-001022-1	7152327	392585472	270	42	1.82	121.2	4.4	15.6	Human fetal astrocytes	Synaptosomes pHrodo red
Row 102	LP01-302-0_625	SP190705_01	8397	5	6	Data	450	1.39	0.19	2019-07-09	STF-001102	STF-001102-1	7903154	373638016	281	45	2.12	140.7	0.4	16	Human fetal astrocytes	Synaptosomes pHrodo red
Row 103	LP01-302-0_625	SP190705_01	8397	5	7	Data	450	1.39	0.14	2019-07-09	STF-001023	STF-001023-1	8249865	409119072	291	50	2.02	134.1	-3.3	17.2	Human fetal astrocytes	Synaptosomes pHrodo red
Row 104	LP01-302-0_625	SP190705_01	8397	5	8	Data	450	1.39	0.15	2019-07-09	STF-001103	STF-001103-1	6953100	372730400	305	48	1.87	124.1	-8.4	15.7	Human fetal astrocytes	Synaptosomes pHrodo red
Row 105	LP01-302-0_625	SP190705_01	8397	5	9	Data	450	1.39	0.65	2019-07-09	STF-001024	STF-001024-1	7609307	429793216	304	45	1.77	117.8	-8.1	14.8	Human fetal astrocytes	Synaptosomes pHrodo red
Row 106	LP01-302-0_625	SP190705_01	8397	5	10	Data	450	1.39	0.43	2019-07-09	STF-001104	STF-001104-1	5861708	421771616	288	35	1.39	92.4	-2.2	12.2	Human fetal astrocytes	Synaptosomes pHrodo red
Row 107	LP01-302-0_625	SP190705_01	8397	5	11	Data	450	1.39	0.27	2019-07-09	STF-001025	STF-001025-1	4414441	449217728	338	29	0.98	65.4	-20.6	8.6	Human fetal astrocytes	Synaptosomes pHrodo red
Row 108	LP01-302-0_625	SP190705_01	8397	5	12	Data	450	1.39	0.42	2019-07-09	STF-001105	STF-001105-1	5855899	431990368	299	38	1.36	90.2	-6.2	12.7	Human fetal astrocytes	Synaptosomes pHrodo red
Row 109	LP01-302-0_625	SP190705_01	8397	5	13	Data	450	1.39	0.45	2019-07-09	STF-001026	STF-001026-1	6426805	482609568	324	38	1.33	88.6	-15.4	11.7	Human fetal astrocytes	Synaptosomes pHrodo red
Row 110	LP01-302-0_625	SP190705_01	8397	5	14	Data	450	1.39	0.41	2019-07-09	STF-001106	STF-001106-1	5621071	467198528	314	33	1.2	80	-11.7	10.5	Human fetal astrocytes	Synaptosomes pHrodo red
Row 111	LP01-302-0_625	SP190705_01	8397	5	15	Data	450	1.39	0.39	2019-07-09	STF-001027	STF-001027-1	4602597	484244032	332	29	0.95	63.2	-18.3	8.7	Human fetal astrocytes	Synaptosomes pHrodo red
Row 112	LP01-302-0_625	SP190705_01	8397	5	16	Data	450	1.39	0.41	2019-07-09	STF-001107	STF-001107-1	6272227	529591200	342	41	1.18	78.8	-22	12	Human fetal astrocytes	Synaptosomes pHrodo red
Row 113	LP01-302-0_625	SP190705_01	8397	5	17	Data	450	1.39	0.66	2019-07-09	STF-001028	STF-001028-1	5521351	515108576	349	32	1.07	71.3	-24.6	9.2	Human fetal astrocytes	Synaptosomes pHrodo red
Row 114	LP01-302-0_625	SP190705_01	8397	5	18	Data	450	1.39	0.14	2019-07-09	STF-001108	STF-001108-1	6291760	496134976	303	36	1.27	84.4	-7.7	11.9	Human fetal astrocytes	Synaptosomes pHrodo red
Row 115	LP01-302-0_625	SP190705_01	8397	5	19	Data	450	1.39	0.3	2019-07-09	STF-001029	STF-001029-1	7719402	538564672	339	56	1.43	95.3	-20.9	16.5	Human fetal astrocytes	Synaptosomes pHrodo red
Row 116	LP01-302-0_625	SP190705_01	8397	5	20	Data	450	1.39	0.26	2019-07-09	STF-001109	STF-001109-1	9046825	561112896	341	49	1.61	107.2	-21.7	14.4	Human fetal astrocytes	Synaptosomes pHrodo red
Row 117	LP01-302-0_625	SP190705_01	8397	5	21	Data	450	1.39	0.53	2019-07-09	STF-001030	STF-001030-1	7779253	533774912	329	44	1.46	96.9	-17.2	13.4	Human fetal astrocytes	Synaptosomes pHrodo red
Row 118	LP01-302-0_625	SP190705_01	8397	5	22	Data	450	1.39	0.45	2019-07-09	STF-001110	STF-001110-1	6091211	517580608	317	33	1.18	78.3	-12.8	10.4	Human fetal astrocytes	Synaptosomes pHrodo red
Row 119	LP01-302-0_625	SP190705_01	8397	5	23	Positive Control				2019-07-09			0	289613696	197	0	0	0	31.2	0	Human fetal astrocytes	None
Row 120	LP01-302-0_625	SP190705_01	8397	5	24	Low Control				2019-07-09			404653	3483897	14	8	11.61	772.6	98.3	57.1	Human fetal astrocytes	Synaptosomes pHrodo red
Row 121	LP01-302-0_625	SP190705_01	8397	6	1	High Control				2019-07-09			6300345	313018304	257	41	2.01	133.9	9.2	16	Human fetal astrocytes	Synaptosomes pHrodo red
Row 122	LP01-302-0_625	SP190705_01	8397	6	2	High Control				2019-07-09			4858610	300244928	264	39	1.62	107.6	6.6	14.8	Human fetal astrocytes	Synaptosomes pHrodo red
Row 123	LP01-302-0_625	SP190705_01	8397	6	3	Data	450	1.39	0.34	2019-07-09	STF-001181	STF-001181-1	7899454	413456128	302	46	1.91	127.1	-7.3	15.2	Human fetal astrocytes	Synaptosomes pHrodo red
Row 124	LP01-302-0_625	SP190705_01	8397	6	4	Data	450	1.39	0.54	2019-07-09	STF-080497	STF-080497-2	7038575	398428736	300	51	1.77	117.5	-6.6	17	Human fetal astrocytes	Synaptosomes pHrodo red
Row 125	LP01-302-0_625	SP190705_01	8397	6	5	Data	450	1.39	0.19	2019-07-09	STF-001182	STF-001182-1	6825749	397450048	302	46	1.72	114.2	-7.3	15.2	Human fetal astrocytes	Synaptosomes pHrodo red
Row 126	LP01-302-0_625	SP190705_01	8397	6	6	Data	450	1.39	0.69	2019-07-09	STF-001260	STF-001260-1	5692625	371609696	280	46	1.53	101.9	0.7	16.4	Human fetal astrocytes	Synaptosomes pHrodo red
Row 127	LP01-302-0_625	SP190705_01	8397	6	7	Data	450	1.39	0.35	2019-07-09	STF-001183	STF-001183-1	6486935	399537088	296	44	1.62	108	-5.1	14.9	Human fetal astrocytes	Synaptosomes pHrodo red
Row 128	LP01-302-0_625	SP190705_01	8397	6	8	Data	450	1.39	0.21	2019-07-09	STF-001261	STF-001261-1	8635541	453966080	331	64	1.9	126.5	-18	19.3	Human fetal astrocytes	Synaptosomes pHrodo red
Row 129	LP01-302-0_625	SP190705_01	8397	6	9	Data	450	1.39	0.6	2019-07-09	STF-001184	STF-001184-1	7669959	442404160	297	50	1.73	115.3	-5.5	16.8	Human fetal astrocytes	Synaptosomes pHrodo red
Row 130	LP01-302-0_625	SP190705_01	8397	6	10	Data	450	1.39	0.54	2019-07-09	STF-001262	STF-001262-1	7024701	459491712	315	43	1.53	101.7	-12.1	13.7	Human fetal astrocytes	Synaptosomes pHrodo red
Row 131	LP01-302-0_625	SP190705_01	8397	6	11	Data	450	1.39	0.62	2019-07-09	STF-001185	STF-001185-1	5623496	409432480	322	42	1.37	91.4	-14.7	13	Human fetal astrocytes	Synaptosomes pHrodo red
Row 132	LP01-302-0_625	SP190705_01	8397	6	12	Data	450	1.39	0.83	2019-07-09	STF-001263	STF-001263-1	5776341	454696448	322	45	1.27	84.5	-14.7	14	Human fetal astrocytes	Synaptosomes pHrodo red
Row 133	LP01-302-0_625	SP190705_01	8397	6	13	Data	450	1.39	0.49	2019-07-09	STF-001186	STF-001186-1	8672844	530330720	327	54	1.64	108.8	-16.5	16.5	Human fetal astrocytes	Synaptosomes pHrodo red
Row 134	LP01-302-0_625	SP190705_01	8397	6	14	Data	450	1.39	0.69	2019-07-09	STF-001264	STF-001264-1	6866536	511027200	316	47	1.34	89.4	-12.5	14.9	Human fetal astrocytes	Synaptosomes pHrodo red
Row 135	LP01-302-0_625	SP190705_01	8397	6	15	Data	450	1.39	0.55	2019-07-09	STF-001187	STF-001187-1	5790775	486076736	317	32	1.19	79.2	-12.8	10.1	Human fetal astrocytes	Synaptosomes pHrodo red
Row 136	LP01-302-0_625	SP190705_01	8397	6	16	Data	450	1.39	0.14	2019-07-09	STF-001265	STF-001265-1	7404872	562119360	352	45	1.32	87.6	-25.7	12.8	Human fetal astrocytes	Synaptosomes pHrodo red
Row 137	LP01-302-0_625	SP190705_01	8397	6	17	Data	450	1.39	0.3	2019-07-09	STF-001188	STF-001188-1	6960016	486903488	317	47	1.43	95.1	-12.8	14.8	Human fetal astrocytes	Synaptosomes pHrodo red
Row 138	LP01-302-0_625	SP190705_01	8397	6	18	Data	450	1.39	0.37	2019-07-09	STF-001266	STF-001266-1	9260977	538118272	333	53	1.72	114.5	-18.7	15.9	Human fetal astrocytes	Synaptosomes pHrodo red
Row 139	LP01-302-0_625	SP190705_01	8397	6	19	Data	450	1.39	0.52	2019-07-09	STF-001189	STF-001189-1	8995195	517178368	320	55	1.74	115.7	-13.9	17.2	Human fetal astrocytes	Synaptosomes pHrodo red
Row 140	LP01-302-0_625	SP190705_01	8397	6	20	Data	450	1.39	0.39	2019-07-09	STF-001267	STF-001267-1	3401557	509026016	318	22	0.67	44.5	-13.2	6.9	Human fetal astrocytes	Synaptosomes pHrodo red
Row 141	LP01-302-0_625	SP190705_01	8397	6	21	Data	450	1.39	0.98	2019-07-09	STF-001190	STF-001190-1	8248718	495713280	314	49	1.66	110.7	-11.7	15.6	Human fetal astrocytes	Synaptosomes pHrodo red
Row 142	LP01-302-0_625	SP190705_01	8397	6	22	Data	450	1.39	0.22	2019-07-09	STF-001268	STF-001268-1	6667951	552828288	319	40	1.21	80.2	-13.6	12.5	Human fetal astrocytes	Synaptosomes pHrodo red
Row 143	LP01-302-0_625	SP190705_01	8397	6	23	Positive Control				2019-07-09			0	258152432	197	0	0	0	31.2	0	Human fetal astrocytes	None
Row 144	LP01-302-0_625	SP190705_01	8397	6	24	Low Control				2019-07-09			203084	2415918	10	3	8.41	559.2	99.8	30	Human fetal astrocytes	Synaptosomes pHrodo red
Row 145	LP01-302-0_625	SP190705_01	8397	7	1	High Control				2019-07-09			5127996	363544320	285	35	1.41	93.8	-1.1	12.3	Human fetal astrocytes	Synaptosomes pHrodo red
Row 146	LP01-302-0_625	SP190705_01	8397	7	2	High Control				2019-07-09			5415588	298435680	247	32	1.81	120.7	12.8	13	Human fetal astrocytes	Synaptosomes pHrodo red
Row 147	LP01-302-0_625	SP190705_01	8397	7	3	Data	450	1.39	0.21	2019-07-09	STF-001031	STF-001031-1	6272747	363122208	288	45	1.73	114.9	-2.2	15.6	Human fetal astrocytes	Synaptosomes pHrodo red
Row 148	LP01-302-0_625	SP190705_01	8397	7	4	Data	450	1.39	0.37	2019-07-09	STF-001111	STF-001111-1	5213003	340199424	267	37	1.53	101.9	5.5	13.9	Human fetal astrocytes	Synaptosomes pHrodo red
Row 149	LP01-302-0_625	SP190705_01	8397	7	5	Data	450	1.39	0.13	2019-07-09	STF-001032	STF-001032-1	7617351	361119904	281	49	2.11	140.3	0.4	17.4	Human fetal astrocytes	Synaptosomes pHrodo red
Row 150	LP01-302-0_625	SP190705_01	8397	7	6	Data	450	1.39	0.44	2019-07-09	STF-001112	STF-001112-1	6740450	393586080	306	48	1.71	113.9	-8.8	15.7	Human fetal astrocytes	Synaptosomes pHrodo red
Row 151	LP01-302-0_625	SP190705_01	8397	7	7	Data	450	1.39	0.39	2019-07-09	STF-001033	STF-001033-1	6300903	402519424	299	41	1.57	104.1	-6.2	13.7	Human fetal astrocytes	Synaptosomes pHrodo red
Row 152	LP01-302-0_625	SP190705_01	8397	7	8	Data	450	1.39	0.79	2019-07-09	STF-001113	STF-001113-1	6458455	368894176	289	42	1.75	116.5	-2.6	14.5	Human fetal astrocytes	Synaptosomes pHrodo red
Row 153	LP01-302-0_625	SP190705_01	8397	7	9	Data	450	1.39	0.61	2019-07-09	STF-001034	STF-001034-1	7292662	430540320	341	55	1.69	112.7	-21.7	16.1	Human fetal astrocytes	Synaptosomes pHrodo red
Row 154	LP01-302-0_625	SP190705_01	8397	7	10	Data	450	1.39	0.4	2019-07-09	STF-001114	STF-001114-1	6235446	394737568	291	40	1.58	105.1	-3.3	13.7	Human fetal astrocytes	Synaptosomes pHrodo red
Row 155	LP01-302-0_625	SP190705_01	8397	7	11	Data	450	1.39	0.34	2019-07-09	STF-001035	STF-001035-1	6397683	439057120	285	42	1.46	96.9	-1.1	14.7	Human fetal astrocytes	Synaptosomes pHrodo red
Row 156	LP01-302-0_625	SP190705_01	8397	7	12	Data	450	1.39	0.3	2019-07-09	STF-001115	STF-001115-1	8577222	468521760	304	58	1.83	121.8	-8.1	19.1	Human fetal astrocytes	Synaptosomes pHrodo red
Row 157	LP01-302-0_625	SP190705_01	8397	7	13	Data	450	1.39	0.33	2019-07-09	STF-001036	STF-001036-1	7440220	506630272	343	60	1.47	97.7	-22.4	17.5	Human fetal astrocytes	Synaptosomes pHrodo red
Row 158	LP01-302-0_625	SP190705_01	8397	7	14	Data	450	1.39	0.44	2019-07-09	STF-001116	STF-001116-1	6995502	511095648	339	51	1.37	91	-20.9	15	Human fetal astrocytes	Synaptosomes pHrodo red
Row 159	LP01-302-0_625	SP190705_01	8397	7	15	Data	450	1.39	0.31	2019-07-09	STF-001037	STF-001037-1	6657620	482615264	316	45	1.38	91.8	-12.5	14.2	Human fetal astrocytes	Synaptosomes pHrodo red
Row 160	LP01-302-0_625	SP190705_01	8397	7	16	Data	450	1.39	0.25	2019-07-09	STF-001117	STF-001117-1	6037323	511851840	336	39	1.18	78.5	-19.8	11.6	Human fetal astrocytes	Synaptosomes pHrodo red
Row 161	LP01-302-0_625	SP190705_01	8397	7	17	Data	450	1.39	0.25	2019-07-09	STF-001038	STF-001038-1	8765927	550699648	346	49	1.59	105.9	-23.5	14.2	Human fetal astrocytes	Synaptosomes pHrodo red
Row 162	LP01-302-0_625	SP190705_01	8397	7	18	Data	450	1.39	0.54	2019-07-09	STF-001118	STF-001118-1	6133060	514886464	357	37	1.19	79.2	-27.5	10.4	Human fetal astrocytes	Synaptosomes pHrodo red
Row 163	LP01-302-0_625	SP190705_01	8397	7	19	Data	450	1.39	0.31	2019-07-09	STF-001039	STF-001039-1	6143191	538250496	360	38	1.14	75.9	-28.6	10.6	Human fetal astrocytes	Synaptosomes pHrodo red
Row 164	LP01-302-0_625	SP190705_01	8397	7	20	Data	450	1.39	0.31	2019-07-09	STF-001119	STF-001119-1	6398078	570709120	334	38	1.12	74.6	-19.1	11.4	Human fetal astrocytes	Synaptosomes pHrodo red
Row 165	LP01-302-0_625	SP190705_01	8397	7	21	Data	450	1.39	0.61	2019-07-09	STF-001040	STF-001040-1	6157728	545539712	331	34	1.13	75.1	-18	10.3	Human fetal astrocytes	Synaptosomes pHrodo red
Row 166	LP01-302-0_625	SP190705_01	8397	7	22	Data	450	1.39	0.15	2019-07-09	STF-001120	STF-001120-1	6944489	524234592	331	46	1.32	88.1	-18	13.9	Human fetal astrocytes	Synaptosomes pHrodo red
Row 167	LP01-302-0_625	SP190705_01	8397	7	23	Positive Control				2019-07-09			0	331541632	207	0	0	0	27.5	0	Human fetal astrocytes	None
Row 168	LP01-302-0_625	SP190705_01	8397	7	24	Low Control				2019-07-09			232739	1757655	6	3	13.24	880.8	101.3	50	Human fetal astrocytes	Synaptosomes pHrodo red
Row 169	LP01-302-0_625	SP190705_01	8397	8	1	High Control				2019-07-09			7457342	332258944	281	51	2.24	149.3	0.4	18.1	Human fetal astrocytes	Synaptosomes pHrodo red
Row 170	LP01-302-0_625	SP190705_01	8397	8	2	High Control				2019-07-09			8361687	382444928	299	65	2.19	145.4	-6.2	21.7	Human fetal astrocytes	Synaptosomes pHrodo red
Row 171	LP01-302-0_625	SP190705_01	8397	8	3	Data	450	1.39	0.19	2019-07-09	STF-001191	STF-001191-1	6964009	369389760	285	51	1.89	125.4	-1.1	17.9	Human fetal astrocytes	Synaptosomes pHrodo red
Row 172	LP01-302-0_625	SP190705_01	8397	8	4	Data	450	1.39	0.56	2019-07-09	STF-001269	STF-001269-1	8576429	396070688	297	59	2.17	144	-5.5	19.9	Human fetal astrocytes	Synaptosomes pHrodo red
Row 173	LP01-302-0_625	SP190705_01	8397	8	5	Data	450	1.39	0.44	2019-07-09	STF-001192	STF-001192-1	10194712	401720096	293	62	2.54	168.8	-4	21.2	Human fetal astrocytes	Synaptosomes pHrodo red
Row 174	LP01-302-0_625	SP190705_01	8397	8	6	Data	450	1.39	0.96	2019-07-09	STF-001270	STF-001270-1	6344495	384597536	287	42	1.65	109.7	-1.8	14.6	Human fetal astrocytes	Synaptosomes pHrodo red
Row 175	LP01-302-0_625	SP190705_01	8397	8	7	Data	450	1.39	0.48	2019-07-09	STF-001193	STF-001193-1	6323757	380845728	276	49	1.66	110.4	2.2	17.8	Human fetal astrocytes	Synaptosomes pHrodo red
Row 176	LP01-302-0_625	SP190705_01	8397	8	8	Data	450	1.39	0.42	2019-07-09	STF-001271	STF-001271-1	8554173	444860544	306	55	1.92	127.9	-8.8	18	Human fetal astrocytes	Synaptosomes pHrodo red
Row 177	LP01-302-0_625	SP190705_01	8397	8	9	Data	450	1.39	0.56	2019-07-09	STF-001194	STF-001194-1	8070061	474477760	338	56	1.7	113.1	-20.6	16.6	Human fetal astrocytes	Synaptosomes pHrodo red
Row 178	LP01-302-0_625	SP190705_01	8397	8	10	Data	450	1.39	0.66	2019-07-09	STF-001272	STF-001272-1	7641481	428431040	311	54	1.78	118.6	-10.6	17.4	Human fetal astrocytes	Synaptosomes pHrodo red
Row 179	LP01-302-0_625	SP190705_01	8397	8	11	Data	450	1.39	0.57	2019-07-09	STF-001195	STF-001195-1	8769745	476253376	349	63	1.84	122.5	-24.6	18.1	Human fetal astrocytes	Synaptosomes pHrodo red
Row 180	LP01-302-0_625	SP190705_01	8397	8	12	Data	450	1.39	0.5	2019-07-09	STF-001273	STF-001273-1	7451435	447089856	294	54	1.67	110.9	-4.4	18.4	Human fetal astrocytes	Synaptosomes pHrodo red
Row 181	LP01-302-0_625	SP190705_01	8397	8	13	Data	450	1.39	0.42	2019-07-09	STF-001196	STF-001196-1	6810961	534459584	332	40	1.27	84.8	-18.3	12	Human fetal astrocytes	Synaptosomes pHrodo red
Row 182	LP01-302-0_625	SP190705_01	8397	8	14	Data	450	1.39	0.45	2019-07-09	STF-001274	STF-001274-1	8197901	488719776	332	58	1.68	111.6	-18.3	17.5	Human fetal astrocytes	Synaptosomes pHrodo red
Row 183	LP01-302-0_625	SP190705_01	8397	8	15	Data	450	1.39	0.54	2019-07-09	STF-001197	STF-001197-1	8775397	571898560	352	60	1.53	102.1	-25.7	17	Human fetal astrocytes	Synaptosomes pHrodo red
Row 184	LP01-302-0_625	SP190705_01	8397	8	16	Data	450	1.39	0.44	2019-07-09	STF-001275	STF-001275-1	7738920	511204384	341	55	1.51	100.7	-21.7	16.1	Human fetal astrocytes	Synaptosomes pHrodo red
Row 185	LP01-302-0_625	SP190705_01	8397	8	17	Data	450	1.39	0.49	2019-07-09	STF-001198	STF-001198-1	6970661	538700672	365	44	1.29	86.1	-30.5	12.1	Human fetal astrocytes	Synaptosomes pHrodo red
Row 186	LP01-302-0_625	SP190705_01	8397	8	18	Data	450	1.39	0.66	2019-07-09	STF-001276	STF-001276-1	10221812	573334272	342	62	1.78	118.6	-22	18.1	Human fetal astrocytes	Synaptosomes pHrodo red
Row 187	LP01-302-0_625	SP190705_01	8397	8	19	Data	450	1.39	0.14	2019-07-09	STF-001199	STF-001199-1	8342923	548841216	349	60	1.52	101.1	-24.6	17.2	Human fetal astrocytes	Synaptosomes pHrodo red
Row 188	LP01-302-0_625	SP190705_01	8397	8	20	Data	450	1.39	0.62	2019-07-09	STF-001277	STF-001277-1	8156115	555079168	331	49	1.47	97.7	-18	14.8	Human fetal astrocytes	Synaptosomes pHrodo red
Row 189	LP01-302-0_625	SP190705_01	8397	8	21	Data	450	1.39	0.35	2019-07-09	STF-001200	STF-001200-1	6437099	564474816	324	39	1.14	75.9	-15.4	12	Human fetal astrocytes	Synaptosomes pHrodo red
Row 190	LP01-302-0_625	SP190705_01	8397	8	22	Data	450	1.39	0.15	2019-07-09	STF-001278	STF-001278-1	7295123	544887552	331	45	1.34	89.1	-18	13.6	Human fetal astrocytes	Synaptosomes pHrodo red
Row 191	LP01-302-0_625	SP190705_01	8397	8	23	Positive Control				2019-07-09			85151	378535968	231	1	0.02	1.5	18.7	0.4	Human fetal astrocytes	None
Row 192	LP01-302-0_625	SP190705_01	8397	8	24	Low Control				2019-07-09			130335	779479	3	2	16.72	1112.2	102.4	66.7	Human fetal astrocytes	Synaptosomes pHrodo red
Row 193	LP01-302-0_625	SP190705_01	8397	9	1	High Control				2019-07-09			6315231	279014112	251	41	2.26	150.6	11.4	16.3	Human fetal astrocytes	Synaptosomes pHrodo red
Row 194	LP01-302-0_625	SP190705_01	8397	9	2	High Control				2019-07-09			7122055	358539360	280	51	1.99	132.1	0.7	18.2	Human fetal astrocytes	Synaptosomes pHrodo red
Row 195	LP01-302-0_625	SP190705_01	8397	9	3	Data	450	1.39	0.18	2019-07-09	STF-001041	STF-001041-1	7455209	342681792	257	54	2.18	144.7	9.2	21	Human fetal astrocytes	Synaptosomes pHrodo red
Row 196	LP01-302-0_625	SP190705_01	8397	9	4	Data	450	1.39	0.37	2019-07-09	STF-001121	STF-001121-1	7945464	369846752	263	43	2.15	142.9	7	16.3	Human fetal astrocytes	Synaptosomes pHrodo red
Row 197	LP01-302-0_625	SP190705_01	8397	9	5	Data	450	1.39	0.94	2019-07-09	STF-001042	STF-001042-1	7564732	367046464	275	48	2.06	137.1	2.6	17.5	Human fetal astrocytes	Synaptosomes pHrodo red
Row 198	LP01-302-0_625	SP190705_01	8397	9	6	Data	450	1.39	0.95	2019-07-09	STF-001122	STF-001122-1	6602413	418437504	312	35	1.58	105	-11	11.2	Human fetal astrocytes	Synaptosomes pHrodo red
Row 199	LP01-302-0_625	SP190705_01	8397	9	7	Data	450	1.39	0.19	2019-07-09	STF-001043	STF-001043-1	8677861	439445088	304	59	1.97	131.4	-8.1	19.4	Human fetal astrocytes	Synaptosomes pHrodo red
Row 200	LP01-302-0_625	SP190705_01	8397	9	8	Data	450	1.39	0.37	2019-07-09	STF-001123	STF-001123-1	8358141	401954496	274	56	2.08	138.3	2.9	20.4	Human fetal astrocytes	Synaptosomes pHrodo red
Row 201	LP01-302-0_625	SP190705_01	8397	9	9	Data	450	1.39	0.3	2019-07-09	STF-001044	STF-001044-1	7252265	444694560	312	44	1.63	108.5	-11	14.1	Human fetal astrocytes	Synaptosomes pHrodo red
Row 202	LP01-302-0_625	SP190705_01	8397	9	10	Data	450	1.39	0.32	2019-07-09	STF-001124	STF-001124-1	7710957	409537248	279	51	1.88	125.2	1.1	18.3	Human fetal astrocytes	Synaptosomes pHrodo red
Row 203	LP01-302-0_625	SP190705_01	8397	9	11	Data	450	1.39	0.42	2019-07-09	STF-001045	STF-001045-1	6576965	414936544	280	42	1.59	105.4	0.7	15	Human fetal astrocytes	Synaptosomes pHrodo red
Row 204	LP01-302-0_625	SP190705_01	8397	9	12	Data	450	1.39	0.39	2019-07-09	STF-001125	STF-001125-1	8650295	479957088	326	53	1.8	119.9	-16.1	16.3	Human fetal astrocytes	Synaptosomes pHrodo red
Row 205	LP01-302-0_625	SP190705_01	8397	9	13	Data	450	1.39	0.56	2019-07-09	STF-001046	STF-001046-1	9738211	517246432	322	64	1.88	125.2	-14.7	19.9	Human fetal astrocytes	Synaptosomes pHrodo red
Row 206	LP01-302-0_625	SP190705_01	8397	9	14	Data	450	1.39	0.45	2019-07-09	STF-001126	STF-001126-1	5816175	453622752	329	39	1.28	85.3	-17.2	11.9	Human fetal astrocytes	Synaptosomes pHrodo red
Row 207	LP01-302-0_625	SP190705_01	8397	9	15	Data	450	1.39	0.47	2019-07-09	STF-001047	STF-001047-1	9510506	548502016	354	60	1.73	115.3	-26.4	16.9	Human fetal astrocytes	Synaptosomes pHrodo red
Row 208	LP01-302-0_625	SP190705_01	8397	9	16	Data	450	1.39	0.41	2019-07-09	STF-001127	STF-001127-1	9401182	510717792	348	55	1.84	122.4	-24.2	15.8	Human fetal astrocytes	Synaptosomes pHrodo red
Row 209	LP01-302-0_625	SP190705_01	8397	9	17	Data	450	1.39	0.42	2019-07-09	STF-001048	STF-001048-1	7642123	526817856	345	46	1.45	96.5	-23.1	13.3	Human fetal astrocytes	Synaptosomes pHrodo red
Row 210	LP01-302-0_625	SP190705_01	8397	9	18	Data	450	1.39	0.33	2019-07-09	STF-001128	STF-001128-1	7043432	534395424	351	44	1.32	87.7	-25.3	12.5	Human fetal astrocytes	Synaptosomes pHrodo red
Row 211	LP01-302-0_625	SP190705_01	8397	9	19	Data	450	1.39	0.33	2019-07-09	STF-001049	STF-001049-1	7805191	524520832	333	43	1.49	99	-18.7	12.9	Human fetal astrocytes	Synaptosomes pHrodo red
Row 212	LP01-302-0_625	SP190705_01	8397	9	20	Data	450	1.39	0.51	2019-07-09	STF-001129	STF-001129-1	6622606	540729600	363	40	1.22	81.5	-29.7	11	Human fetal astrocytes	Synaptosomes pHrodo red
Row 213	LP01-302-0_625	SP190705_01	8397	9	21	Data	450	1.39	0.34	2019-07-09	STF-001050	STF-001050-1	7957318	532963392	355	44	1.49	99.3	-26.8	12.4	Human fetal astrocytes	Synaptosomes pHrodo red
Row 214	LP01-302-0_625	SP190705_01	8397	9	22	Data	450	1.39	0.62	2019-07-09	STF-001130	STF-001130-1	9092903	599003584	349	56	1.52	101	-24.6	16	Human fetal astrocytes	Synaptosomes pHrodo red
Row 215	LP01-302-0_625	SP190705_01	8397	9	23	Positive Control				2019-07-09			0	336192864	225	0	0	0	20.9	0	Human fetal astrocytes	None
Row 216	LP01-302-0_625	SP190705_01	8397	9	24	Low Control				2019-07-09			289346	2633007	10	5	10.99	731	99.8	50	Human fetal astrocytes	Synaptosomes pHrodo red
Row 217	LP01-302-0_625	SP190705_01	8397	10	1	High Control				2019-07-09			6623896	375102976	304	44	1.77	117.5	-8.1	14.5	Human fetal astrocytes	Synaptosomes pHrodo red
Row 218	LP01-302-0_625	SP190705_01	8397	10	2	High Control				2019-07-09			7088474	336258016	283	49	2.11	140.2	-0.4	17.3	Human fetal astrocytes	Synaptosomes pHrodo red
Row 219	LP01-302-0_625	SP190705_01	8397	10	3	Data	450	1.39	0.6	2019-07-09	STF-001201	STF-001201-1	6852221	353127680	265	42	1.94	129.1	6.2	15.8	Human fetal astrocytes	Synaptosomes pHrodo red
Row 220	LP01-302-0_625	SP190705_01	8397	10	4	Data	450	1.39	0.66	2019-07-09	STF-001279	STF-001279-1	7209551	345182400	255	46	2.09	138.9	9.9	18	Human fetal astrocytes	Synaptosomes pHrodo red
Row 221	LP01-302-0_625	SP190705_01	8397	10	5	Data	450	1.39	0.44	2019-07-09	STF-001202	STF-001202-1	8260418	367035904	280	56	2.25	149.7	0.7	20	Human fetal astrocytes	Synaptosomes pHrodo red
Row 222	LP01-302-0_625	SP190705_01	8397	10	6	Data	450	1.39	0.55	2019-07-09	STF-001280	STF-001280-1	7808352	442776064	304	53	1.76	117.3	-8.1	17.4	Human fetal astrocytes	Synaptosomes pHrodo red
Row 223	LP01-302-0_625	SP190705_01	8397	10	7	Data	450	1.39	0.22	2019-07-09	STF-001203	STF-001203-1	9293882	496210144	336	59	1.87	124.6	-19.8	17.6	Human fetal astrocytes	Synaptosomes pHrodo red
Row 224	LP01-302-0_625	SP190705_01	8397	10	8	Data	450	1.39	0.58	2019-07-09	STF-001281	STF-001281-1	4914353	345828672	272	36	1.42	94.5	3.7	13.2	Human fetal astrocytes	Synaptosomes pHrodo red
Row 225	LP01-302-0_625	SP190705_01	8397	10	9	Data	450	1.39	0.39	2019-07-09	STF-001204	STF-001204-1	5952359	411237664	303	41	1.45	96.3	-7.7	13.5	Human fetal astrocytes	Synaptosomes pHrodo red
Row 226	LP01-302-0_625	SP190705_01	8397	10	10	Data	450	1.39	0.5	2019-07-09	STF-078950	STF-078950-2	10561884	504920928	328	60	2.09	139.1	-16.9	18.3	Human fetal astrocytes	Synaptosomes pHrodo red
Row 227	LP01-302-0_625	SP190705_01	8397	10	11	Data	450	1.39	0.31	2019-07-09	STF-001205	STF-001205-1	7715104	411958208	304	49	1.87	124.6	-8.1	16.1	Human fetal astrocytes	Synaptosomes pHrodo red
Row 228	LP01-302-0_625	SP190705_01	8397	10	12	Data	450	1.39	0.24	2019-07-09	STF-001282	STF-001282-1	9098047	489217632	345	62	1.86	123.7	-23.1	18	Human fetal astrocytes	Synaptosomes pHrodo red
Row 229	LP01-302-0_625	SP190705_01	8397	10	13	Data	450	1.39	0.64	2019-07-09	STF-001206	STF-001206-1	7650112	496212128	347	51	1.54	102.6	-23.9	14.7	Human fetal astrocytes	Synaptosomes pHrodo red
Row 230	LP01-302-0_625	SP190705_01	8397	10	14	Data	450	1.39	0.28	2019-07-09	STF-001283	STF-001283-1	7993643	502109824	340	59	1.59	105.9	-21.3	17.4	Human fetal astrocytes	Synaptosomes pHrodo red
Row 231	LP01-302-0_625	SP190705_01	8397	10	15	Data	450	1.39	0.48	2019-07-09	STF-001207	STF-001207-1	7678677	488858144	334	42	1.57	104.5	-19.1	12.6	Human fetal astrocytes	Synaptosomes pHrodo red
Row 232	LP01-302-0_625	SP190705_01	8397	10	16	Data	450	1.39	0.52	2019-07-09	STF-001284	STF-001284-1	6331548	516796960	340	38	1.23	81.5	-21.3	11.2	Human fetal astrocytes	Synaptosomes pHrodo red
Row 233	LP01-302-0_625	SP190705_01	8397	10	17	Data	450	1.39	0.25	2019-07-09	STF-001208	STF-001208-1	9387318	537449088	359	59	1.75	116.2	-28.3	16.4	Human fetal astrocytes	Synaptosomes pHrodo red
Row 234	LP01-302-0_625	SP190705_01	8397	10	18	Data	450	1.39	0.48	2019-07-09	STF-001285	STF-001285-1	8261458	523637408	317	50	1.58	104.9	-12.8	15.8	Human fetal astrocytes	Synaptosomes pHrodo red
Row 235	LP01-302-0_625	SP190705_01	8397	10	19	Data	450	1.39	0.5	2019-07-09	STF-001209	STF-001209-1	8613262	517204960	313	51	1.67	110.8	-11.4	16.3	Human fetal astrocytes	Synaptosomes pHrodo red
Row 236	LP01-302-0_625	SP190705_01	8397	10	20	Data	450	1.39	0.49	2019-07-09	STF-001286	STF-001286-1	6020020	550320576	326	44	1.09	72.8	-16.1	13.5	Human fetal astrocytes	Synaptosomes pHrodo red
Row 237	LP01-302-0_625	SP190705_01	8397	10	21	Data	450	1.39	0.35	2019-07-09	STF-001210	STF-001210-1	7062816	482361824	337	45	1.46	97.4	-20.2	13.4	Human fetal astrocytes	Synaptosomes pHrodo red
Row 238	LP01-302-0_625	SP190705_01	8397	10	22	Data	450	1.39	0.46	2019-07-09	STF-001287	STF-001287-1	7586915	543111872	331	44	1.4	92.9	-18	13.3	Human fetal astrocytes	Synaptosomes pHrodo red
Row 239	LP01-302-0_625	SP190705_01	8397	10	23	Positive Control				2019-07-09			0	331646080	193	0	0	0	32.7	0	Human fetal astrocytes	None
Row 240	LP01-302-0_625	SP190705_01	8397	10	24	Low Control				2019-07-09			253186	3043278	14	4	8.32	553.4	98.3	28.6	Human fetal astrocytes	Synaptosomes pHrodo red
Row 241	LP01-302-0_625	SP190705_01	8397	11	1	High Control				2019-07-09			5408359	368164960	291	37	1.47	97.7	-3.3	12.7	Human fetal astrocytes	Synaptosomes pHrodo red
Row 242	LP01-302-0_625	SP190705_01	8397	11	2	High Control				2019-07-09			4883359	316795392	239	32	1.54	102.5	15.8	13.4	Human fetal astrocytes	Synaptosomes pHrodo red
Row 243	LP01-302-0_625	SP190705_01	8397	11	3	Data	450	1.39	0.26	2019-07-09	STF-001051	STF-001051-1	4130828	381988960	288	29	1.08	71.9	-2.2	10.1	Human fetal astrocytes	Synaptosomes pHrodo red
Row 244	LP01-302-0_625	SP190705_01	8397	11	4	Data	450	1.39	0.41	2019-07-09	STF-001131	STF-001131-1	5352082	379162528	293	40	1.41	93.9	-4	13.7	Human fetal astrocytes	Synaptosomes pHrodo red
Row 245	LP01-302-0_625	SP190705_01	8397	11	5	Data	450	1.39	0.51	2019-07-09	STF-001052	STF-001052-1	6195097	394775392	297	40	1.57	104.4	-5.5	13.5	Human fetal astrocytes	Synaptosomes pHrodo red
Row 246	LP01-302-0_625	SP190705_01	8397	11	6	Data	450	1.39	0.33	2019-07-09	STF-001132	STF-001132-1	6757186	439289504	300	42	1.54	102.3	-6.6	14	Human fetal astrocytes	Synaptosomes pHrodo red
Row 247	LP01-302-0_625	SP190705_01	8397	11	7	Data	450	1.39	0.44	2019-07-09	STF-001053	STF-001053-1	13499690	425806880	285	48	3.17	210.9	-1.1	16.8	Human fetal astrocytes	Synaptosomes pHrodo red
Row 248	LP01-302-0_625	SP190705_01	8397	11	8	Data	450	1.39	0.18	2019-07-09	STF-001133	STF-001133-1	4763561	458152896	315	34	1.04	69.2	-12.1	10.8	Human fetal astrocytes	Synaptosomes pHrodo red
Row 249	LP01-302-0_625	SP190705_01	8397	11	9	Data	450	1.39	0.59	2019-07-09	STF-001054	STF-001054-1	7648782	402773408	289	49	1.9	126.3	-2.6	17	Human fetal astrocytes	Synaptosomes pHrodo red
Row 250	LP01-302-0_625	SP190705_01	8397	11	10	Data	450	1.39	0.16	2019-07-09	STF-001134	STF-001134-1	5221378	384643456	278	36	1.36	90.3	1.5	12.9	Human fetal astrocytes	Synaptosomes pHrodo red
Row 251	LP01-302-0_625	SP190705_01	8397	11	11	Data	450	1.39	0.36	2019-07-09	STF-001055	STF-001055-1	5776164	409125632	278	40	1.41	93.9	1.5	14.4	Human fetal astrocytes	Synaptosomes pHrodo red
Row 252	LP01-302-0_625	SP190705_01	8397	11	12	Data	450	1.39	0.47	2019-07-09	STF-001135	STF-001135-1	4432242	435996736	291	33	1.02	67.6	-3.3	11.3	Human fetal astrocytes	Synaptosomes pHrodo red
Row 253	LP01-302-0_625	SP190705_01	8397	11	13	Data	450	1.39	0.19	2019-07-09	STF-001056	STF-001056-1	7268032	468458432	308	47	1.55	103.2	-9.5	15.3	Human fetal astrocytes	Synaptosomes pHrodo red
Row 254	LP01-302-0_625	SP190705_01	8397	11	14	Data	450	1.39	0.36	2019-07-09	STF-001136	STF-001136-1	8532784	463317504	308	48	1.84	122.5	-9.5	15.6	Human fetal astrocytes	Synaptosomes pHrodo red
Row 255	LP01-302-0_625	SP190705_01	8397	11	15	Data	450	1.39	0.65	2019-07-09	STF-001057	STF-001057-1	5644112	444628448	313	34	1.27	84.4	-11.4	10.9	Human fetal astrocytes	Synaptosomes pHrodo red
Row 256	LP01-302-0_625	SP190705_01	8397	11	16	Data	450	1.39	0.46	2019-07-09	STF-001137	STF-001137-1	5890509	442560448	317	39	1.33	88.5	-12.8	12.3	Human fetal astrocytes	Synaptosomes pHrodo red
Row 257	LP01-302-0_625	SP190705_01	8397	11	17	Data	450	1.39	0.27	2019-07-09	STF-001058	STF-001058-1	6759465	473384704	312	51	1.43	95	-11	16.3	Human fetal astrocytes	Synaptosomes pHrodo red
Row 258	LP01-302-0_625	SP190705_01	8397	11	18	Data	450	1.39	0.18	2019-07-09	STF-001138	STF-001138-1	9164967	543962112	337	52	1.68	112.1	-20.2	15.4	Human fetal astrocytes	Synaptosomes pHrodo red
Row 259	LP01-302-0_625	SP190705_01	8397	11	19	Data	450	1.39	0.48	2019-07-09	STF-001059	STF-001059-1	6058528	480596896	338	36	1.26	83.9	-20.6	10.7	Human fetal astrocytes	Synaptosomes pHrodo red
Row 260	LP01-302-0_625	SP190705_01	8397	11	20	Data	450	1.39	0.32	2019-07-09	STF-001139	STF-001139-1	6489223	539315648	328	37	1.2	80	-16.9	11.3	Human fetal astrocytes	Synaptosomes pHrodo red
Row 261	LP01-302-0_625	SP190705_01	8397	11	21	Data	450	1.39	0.32	2019-07-09	STF-001060	STF-001060-1	7262378	542941184	334	44	1.34	89	-19.1	13.2	Human fetal astrocytes	Synaptosomes pHrodo red
Row 262	LP01-302-0_625	SP190705_01	8397	11	22	Data	450	1.39	0.72	2019-07-09	STF-001140	STF-001140-1	6867722	538163584	324	41	1.28	84.9	-15.4	12.7	Human fetal astrocytes	Synaptosomes pHrodo red
Row 263	LP01-302-0_625	SP190705_01	8397	11	23	Positive Control				2019-07-09			92276	320492352	198	1	0.03	1.9	30.8	0.5	Human fetal astrocytes	None
Row 264	LP01-302-0_625	SP190705_01	8397	11	24	Low Control				2019-07-09			517713	3336597	11	7	15.52	1032.1	99.4	63.6	Human fetal astrocytes	Synaptosomes pHrodo red
Row 265	LP01-302-0_625	SP190705_01	8397	12	1	High Control				2019-07-09			6185440	355137600	313	46	1.74	115.9	-11.4	14.7	Human fetal astrocytes	Synaptosomes pHrodo red
Row 266	LP01-302-0_625	SP190705_01	8397	12	2	High Control				2019-07-09			7065276	323796960	285	59	2.18	145.1	-1.1	20.7	Human fetal astrocytes	Synaptosomes pHrodo red
Row 267	LP01-302-0_625	SP190705_01	8397	12	3	Data	450	1.39	0.49	2019-07-09	STF-001211	STF-001211-1	5969517	385563776	321	44	1.55	103	-14.3	13.7	Human fetal astrocytes	Synaptosomes pHrodo red
Row 268	LP01-302-0_625	SP190705_01	8397	12	4	Data	450	1.39	0.59	2019-07-09	STF-001288	STF-001288-1	6160801	417071776	271	34	1.48	98.3	4	12.5	Human fetal astrocytes	Synaptosomes pHrodo red
Row 269	LP01-302-0_625	SP190705_01	8397	12	5	Data	450	1.39	0.43	2019-07-09	STF-089963	STF-089963-2	6788518	432118784	319	47	1.57	104.5	-13.6	14.7	Human fetal astrocytes	Synaptosomes pHrodo red
Row 270	LP01-302-0_625	SP190705_01	8397	12	6	Data	450	1.39	0.33	2019-07-09	STF-001289	STF-001289-1	9218558	507680320	345	65	1.82	120.8	-23.1	18.8	Human fetal astrocytes	Synaptosomes pHrodo red
Row 271	LP01-302-0_625	SP190705_01	8397	12	7	Data	450	1.39	0.55	2019-07-09	STF-001212	STF-001212-1	15369291	471274816	323	62	3.26	216.9	-15	19.2	Human fetal astrocytes	Synaptosomes pHrodo red
Row 272	LP01-302-0_625	SP190705_01	8397	12	8	Data	450	1.39	0.35	2019-07-09	STF-001290	STF-001290-1	12822413	397444672	294	44	3.23	214.6	-4.4	15	Human fetal astrocytes	Synaptosomes pHrodo red
Row 273	LP01-302-0_625	SP190705_01	8397	12	9	Data	450	1.39	0.48	2019-07-09	STF-001213	STF-001213-1	9362229	479394368	320	62	1.95	129.9	-13.9	19.4	Human fetal astrocytes	Synaptosomes pHrodo red
Row 274	LP01-302-0_625	SP190705_01	8397	12	10	Data	450	1.39	0.42	2019-07-09	STF-001291	STF-001291-1	7296459	461416800	333	46	1.58	105.2	-18.7	13.8	Human fetal astrocytes	Synaptosomes pHrodo red
Row 275	LP01-302-0_625	SP190705_01	8397	12	11	Data	450	1.39	0.67	2019-07-09	STF-001214	STF-001214-1	6710412	550145344	353	43	1.22	81.1	-26.1	12.2	Human fetal astrocytes	Synaptosomes pHrodo red
Row 276	LP01-302-0_625	SP190705_01	8397	12	12	Data	450	1.39	0.65	2019-07-09	STF-001292	STF-001292-1	8815908	498810720	362	57	1.77	117.6	-29.4	15.7	Human fetal astrocytes	Synaptosomes pHrodo red
Row 277	LP01-302-0_625	SP190705_01	8397	12	13	Data	450	1.39	0.63	2019-07-09	STF-001215	STF-001215-1	5895601	475739680	330	39	1.24	82.4	-17.6	11.8	Human fetal astrocytes	Synaptosomes pHrodo red
Row 278	LP01-302-0_625	SP190705_01	8397	12	14	Data	450	1.39	0.72	2019-07-09	STF-001293	STF-001293-1	7626710	506592832	341	46	1.51	100.1	-21.7	13.5	Human fetal astrocytes	Synaptosomes pHrodo red
Row 279	LP01-302-0_625	SP190705_01	8397	12	15	Data	450	1.39	0.45	2019-07-09	STF-001216	STF-001216-1	7351244	499093152	348	42	1.47	98	-24.2	12.1	Human fetal astrocytes	Synaptosomes pHrodo red
Row 280	LP01-302-0_625	SP190705_01	8397	12	16	Data	450	1.39	0.31	2019-07-09	STF-001294	STF-001294-1	9123706	508658656	325	58	1.79	119.3	-15.8	17.8	Human fetal astrocytes	Synaptosomes pHrodo red
Row 281	LP01-302-0_625	SP190705_01	8397	12	17	Data	450	1.39	0.51	2019-07-09	STF-001217	STF-001217-1	7865909	536450176	328	48	1.47	97.5	-16.9	14.6	Human fetal astrocytes	Synaptosomes pHrodo red
Row 282	LP01-302-0_625	SP190705_01	8397	12	18	Data	450	1.39	0.25	2019-07-09	STF-001295	STF-001295-1	7569156	506113376	326	51	1.5	99.5	-16.1	15.6	Human fetal astrocytes	Synaptosomes pHrodo red
Row 283	LP01-302-0_625	SP190705_01	8397	12	19	Data	450	1.39	0.4	2019-07-09	STF-001218	STF-001218-1	7751710	516396256	307	43	1.5	99.9	-9.2	14	Human fetal astrocytes	Synaptosomes pHrodo red
Row 284	LP01-302-0_625	SP190705_01	8397	12	20	Data	450	1.39	0.43	2019-07-09	STF-001296	STF-001296-1	7259420	552438080	349	38	1.31	87.4	-24.6	10.9	Human fetal astrocytes	Synaptosomes pHrodo red
Row 285	LP01-302-0_625	SP190705_01	8397	12	21	Data	450	1.39	0.48	2019-07-09	STF-001219	STF-001219-1	5072329	527749472	342	32	0.96	63.9	-22	9.4	Human fetal astrocytes	Synaptosomes pHrodo red
Row 286	LP01-302-0_625	SP190705_01	8397	12	22	Data	450	1.39	0.34	2019-07-09	STF-001297	STF-001297-1	7917961	519117088	336	49	1.53	101.5	-19.8	14.6	Human fetal astrocytes	Synaptosomes pHrodo red
Row 287	LP01-302-0_625	SP190705_01	8397	12	23	Positive Control				2019-07-09			0	357771808	204	0	0	0	28.6	0	Human fetal astrocytes	None
Row 288	LP01-302-0_625	SP190705_01	8397	12	24	Low Control				2019-07-09			370523	2315069	7	4	16	1064.6	100.9	57.1	Human fetal astrocytes	Synaptosomes pHrodo red
Row 289	LP01-302-0_625	SP190705_01	8397	13	1	High Control				2019-07-09			4985078	342316128	291	32	1.46	96.9	-3.3	11	Human fetal astrocytes	Synaptosomes pHrodo red
Row 290	LP01-302-0_625	SP190705_01	8397	13	2	High Control				2019-07-09			8029983	352933504	281	50	2.28	151.3	0.4	17.8	Human fetal astrocytes	Synaptosomes pHrodo red
Row 291	LP01-302-0_625	SP190705_01	8397	13	3	Data	450	1.39	0.27	2019-07-09	STF-001061	STF-001061-1	7341911	413944832	284	50	1.77	118	-0.7	17.6	Human fetal astrocytes	Synaptosomes pHrodo red
Row 292	LP01-302-0_625	SP190705_01	8397	13	4	Data	450	1.39	0.16	2019-07-09	STF-001141	STF-001141-1	6458977	333207424	274	37	1.94	128.9	2.9	13.5	Human fetal astrocytes	Synaptosomes pHrodo red
Row 293	LP01-302-0_625	SP190705_01	8397	13	5	Data	450	1.39	0.38	2019-07-09	STF-001062	STF-001062-1	6142195	410537696	270	38	1.5	99.5	4.4	14.1	Human fetal astrocytes	Synaptosomes pHrodo red
Row 294	LP01-302-0_625	SP190705_01	8397	13	6	Data	450	1.39	0.36	2019-07-09	STF-001142	STF-001142-1	5899782	413922016	312	34	1.43	94.8	-11	10.9	Human fetal astrocytes	Synaptosomes pHrodo red
Row 295	LP01-302-0_625	SP190705_01	8397	13	7	Data	450	1.39	0.29	2019-07-09	STF-001063	STF-001063-1	17243236	451381344	294	61	3.82	254.1	-4.4	20.7	Human fetal astrocytes	Synaptosomes pHrodo red
Row 296	LP01-302-0_625	SP190705_01	8397	13	8	Data	450	1.39	0.83	2019-07-09	STF-001143	STF-001143-1	7827967	452934304	296	49	1.73	115	-5.1	16.6	Human fetal astrocytes	Synaptosomes pHrodo red
Row 297	LP01-302-0_625	SP190705_01	8397	13	9	Data	450	1.39	0.25	2019-07-09	STF-001064	STF-001064-1	6558406	442615392	316	39	1.48	98.6	-12.5	12.3	Human fetal astrocytes	Synaptosomes pHrodo red
Row 298	LP01-302-0_625	SP190705_01	8397	13	10	Data	450	1.39	0.4	2019-07-09	STF-001144	STF-001144-1	5037562	375598976	251	33	1.34	89.2	11.4	13.1	Human fetal astrocytes	Synaptosomes pHrodo red
Row 299	LP01-302-0_625	SP190705_01	8397	13	11	Data	450	1.39	0.38	2019-07-09	STF-001065	STF-001065-1	8135067	426972960	296	50	1.91	126.7	-5.1	16.9	Human fetal astrocytes	Synaptosomes pHrodo red
Row 300	LP01-302-0_625	SP190705_01	8397	13	12	Data	450	1.39	0.55	2019-07-09	STF-001145	STF-001145-1	5620468	436199136	295	37	1.29	85.7	-4.8	12.5	Human fetal astrocytes	Synaptosomes pHrodo red
Row 301	LP01-302-0_625	SP190705_01	8397	13	13	Data	450	1.39	0.22	2019-07-09	STF-001066	STF-001066-1	7048940	551043904	338	43	1.28	85.1	-20.6	12.7	Human fetal astrocytes	Synaptosomes pHrodo red
Row 302	LP01-302-0_625	SP190705_01	8397	13	14	Data	450	1.39	0.37	2019-07-09	STF-001146	STF-001146-1	6800119	486196928	307	32	1.4	93	-9.2	10.4	Human fetal astrocytes	Synaptosomes pHrodo red
Row 303	LP01-302-0_625	SP190705_01	8397	13	15	Data	450	1.39	0.23	2019-07-09	STF-001067	STF-001067-1	6099858	490814336	320	35	1.24	82.7	-13.9	10.9	Human fetal astrocytes	Synaptosomes pHrodo red
Row 304	LP01-302-0_625	SP190705_01	8397	13	16	Data	450	1.39	0.42	2019-07-09	STF-001147	STF-001147-1	5342404	457484448	347	38	1.17	77.7	-23.9	11	Human fetal astrocytes	Synaptosomes pHrodo red
Row 305	LP01-302-0_625	SP190705_01	8397	13	17	Data	450	1.39	0.42	2019-07-09	STF-001068	STF-001068-1	8186366	583171520	365	50	1.4	93.4	-30.5	13.7	Human fetal astrocytes	Synaptosomes pHrodo red
Row 306	LP01-302-0_625	SP190705_01	8397	13	18	Data	450	1.39	0.55	2019-07-09	STF-001148	STF-001148-1	6581916	486733728	333	43	1.35	89.9	-18.7	12.9	Human fetal astrocytes	Synaptosomes pHrodo red
Row 307	LP01-302-0_625	SP190705_01	8397	13	19	Data	450	1.39	0.52	2019-07-09	STF-001069	STF-001069-1	5996410	591267648	409	35	1.01	67.5	-46.6	8.6	Human fetal astrocytes	Synaptosomes pHrodo red
Row 308	LP01-302-0_625	SP190705_01	8397	13	20	Data	450	1.39	1.09	2019-07-09	STF-001149	STF-001149-1	6541450	532206144	326	37	1.23	81.8	-16.1	11.3	Human fetal astrocytes	Synaptosomes pHrodo red
Row 309	LP01-302-0_625	SP190705_01	8397	13	21	Data	450	1.39	0.29	2019-07-09	STF-001070	STF-001070-1	6959820	530186752	376	42	1.31	87.3	-34.5	11.2	Human fetal astrocytes	Synaptosomes pHrodo red
Row 310	LP01-302-0_625	SP190705_01	8397	13	22	Data	450	1.39	0.44	2019-07-09	STF-001150	STF-001150-1	9956678	632923968	385	57	1.57	104.6	-37.8	14.8	Human fetal astrocytes	Synaptosomes pHrodo red
Row 311	LP01-302-0_625	SP190705_01	8397	13	23	Positive Control				2019-07-09			274838	321569728	197	3	0.09	5.7	31.2	1.5	Human fetal astrocytes	None
Row 312	LP01-302-0_625	SP190705_01	8397	13	24	Low Control				2019-07-09			489759	2636093	10	7	18.58	1235.8	99.8	70	Human fetal astrocytes	Synaptosomes pHrodo red
Row 313	LP01-302-0_625	SP190705_01	8397	14	1	High Control				2019-07-09			7015061	347320320	325	55	2.02	134.4	-15.8	16.9	Human fetal astrocytes	Synaptosomes pHrodo red
Row 314	LP01-302-0_625	SP190705_01	8397	14	2	High Control				2019-07-09			7917316	395712256	305	53	2	133.1	-8.4	17.4	Human fetal astrocytes	Synaptosomes pHrodo red
Row 315	LP01-302-0_625	SP190705_01	8397	14	3	Data	450	1.39	0.31	2019-07-09	STF-001220	STF-001220-1	7119508	358873536	268	44	1.98	132	5.1	16.4	Human fetal astrocytes	Synaptosomes pHrodo red
Row 316	LP01-302-0_625	SP190705_01	8397	14	4	Data	450	1.39	0.58	2019-07-09	STF-001298	STF-001298-1	8528086	375459648	286	58	2.27	151.1	-1.5	20.3	Human fetal astrocytes	Synaptosomes pHrodo red
Row 317	LP01-302-0_625	SP190705_01	8397	14	5	Data	450	1.39	0.56	2019-07-09	STF-001221	STF-001221-1	7245381	437549760	310	46	1.66	110.1	-10.3	14.8	Human fetal astrocytes	Synaptosomes pHrodo red
Row 318	LP01-302-0_625	SP190705_01	8397	14	6	Data	450	1.39	0.3	2019-07-09	STF-001299	STF-001299-1	9839826	412916032	286	54	2.38	158.5	-1.5	18.9	Human fetal astrocytes	Synaptosomes pHrodo red
Row 319	LP01-302-0_625	SP190705_01	8397	14	7	Data	450	1.39	0.59	2019-07-09	STF-001222	STF-001222-1	8104038	417106432	302	43	1.94	129.2	-7.3	14.2	Human fetal astrocytes	Synaptosomes pHrodo red
Row 320	LP01-302-0_625	SP190705_01	8397	14	8	Data	450	1.39	0.43	2019-07-09	STF-001300	STF-001300-1	5681786	447123264	315	36	1.27	84.5	-12.1	11.4	Human fetal astrocytes	Synaptosomes pHrodo red
Row 321	LP01-302-0_625	SP190705_01	8397	14	9	Data	450	1.39	0.58	2019-07-09	STF-001223	STF-001223-1	8706478	435996544	293	52	2	132.8	-4	17.7	Human fetal astrocytes	Synaptosomes pHrodo red
Row 322	LP01-302-0_625	SP190705_01	8397	14	10	Data	450	1.39	0.27	2019-07-09	STF-001301	STF-001301-1	9281829	494259104	320	57	1.88	124.9	-13.9	17.8	Human fetal astrocytes	Synaptosomes pHrodo red
Row 323	LP01-302-0_625	SP190705_01	8397	14	11	Data	450	1.39	0.55	2019-07-09	STF-001224	STF-001224-1	6466295	446601952	304	41	1.45	96.3	-8.1	13.5	Human fetal astrocytes	Synaptosomes pHrodo red
Row 324	LP01-302-0_625	SP190705_01	8397	14	12	Data	450	1.39	0.36	2019-07-09	STF-001302	STF-001302-1	6982181	434016768	301	41	1.61	107	-7	13.6	Human fetal astrocytes	Synaptosomes pHrodo red
Row 325	LP01-302-0_625	SP190705_01	8397	14	13	Data	450	1.39	0.47	2019-07-09	STF-001225	STF-001225-1	6835706	503692160	341	45	1.36	90.3	-21.7	13.2	Human fetal astrocytes	Synaptosomes pHrodo red
Row 326	LP01-302-0_625	SP190705_01	8397	14	14	Data	450	1.39	0.34	2019-07-09	STF-001303	STF-001303-1	7233449	471933312	315	43	1.53	102	-12.1	13.7	Human fetal astrocytes	Synaptosomes pHrodo red
Row 327	LP01-302-0_625	SP190705_01	8397	14	15	Data	450	1.39	0.42	2019-07-09	STF-001226	STF-001226-1	7057351	478576960	322	40	1.47	98.1	-14.7	12.4	Human fetal astrocytes	Synaptosomes pHrodo red
Row 328	LP01-302-0_625	SP190705_01	8397	14	16	Data	450	1.39	0.49	2019-07-09	STF-001304	STF-001304-1	7506320	487547648	314	43	1.54	102.4	-11.7	13.7	Human fetal astrocytes	Synaptosomes pHrodo red
Row 329	LP01-302-0_625	SP190705_01	8397	14	17	Data	450	1.39	0.27	2019-07-09	STF-001227	STF-001227-1	9945061	514755584	371	59	1.93	128.5	-32.7	15.9	Human fetal astrocytes	Synaptosomes pHrodo red
Row 330	LP01-302-0_625	SP190705_01	8397	14	18	Data	450	1.39	0.47	2019-07-09	STF-001305	STF-001305-1	7467047	578762496	361	51	1.29	85.8	-29	14.1	Human fetal astrocytes	Synaptosomes pHrodo red
Row 331	LP01-302-0_625	SP190705_01	8397	14	19	Data	450	1.39	0.38	2019-07-09	STF-001228	STF-001228-1	4031441	508012448	345	20	0.79	52.8	-23.1	5.8	Human fetal astrocytes	Synaptosomes pHrodo red
Row 332	LP01-302-0_625	SP190705_01	8397	14	20	Data	450	1.39	0.36	2019-07-09	STF-001306	STF-001306-1	7341513	555779328	330	38	1.32	87.9	-17.6	11.5	Human fetal astrocytes	Synaptosomes pHrodo red
Row 333	LP01-302-0_625	SP190705_01	8397	14	21	Data	450	1.39	0.52	2019-07-09	STF-001229	STF-001229-1	8083834	583063936	346	45	1.39	92.2	-23.5	13	Human fetal astrocytes	Synaptosomes pHrodo red
Row 334	LP01-302-0_625	SP190705_01	8397	14	22	Data	450	1.39	0.55	2019-07-09	STF-001307	STF-001307-1	5562593	406456032	279	38	1.37	91	1.1	13.6	Human fetal astrocytes	Synaptosomes pHrodo red
Row 335	LP01-302-0_625	SP190705_01	8397	14	23	Positive Control				2019-07-09			419853	355517152	204	2	0.12	7.9	28.6	1	Human fetal astrocytes	None
Row 336	LP01-302-0_625	SP190705_01	8397	14	24	Low Control				2019-07-09			507575	2918844	8	5	17.39	1156.7	100.6	62.5	Human fetal astrocytes	Synaptosomes pHrodo red
Row 337	LP01-302-0_625	SP190705_01	8397	15	1	High Control				2019-07-09			7278464	337701696	263	51	2.16	143.4	7	19.4	Human fetal astrocytes	Synaptosomes pHrodo red
Row 338	LP01-302-0_625	SP190705_01	8397	15	2	High Control				2019-07-09			7191027	354717856	293	53	2.03	134.8	-4	18.1	Human fetal astrocytes	Synaptosomes pHrodo red
Row 339	LP01-302-0_625	SP190705_01	8397	15	3	Data	450	1.39	0.25	2019-07-09	STF-001071	STF-001071-1	4803032	364015040	294	31	1.32	87.8	-4.4	10.5	Human fetal astrocytes	Synaptosomes pHrodo red
Row 340	LP01-302-0_625	SP190705_01	8397	15	4	Data	450	1.39	0.45	2019-07-09	STF-001151	STF-001151-1	6104242	376687200	271	39	1.62	107.8	4	14.4	Human fetal astrocytes	Synaptosomes pHrodo red
Row 341	LP01-302-0_625	SP190705_01	8397	15	5	Data	450	1.39	0.19	2019-07-09	STF-001072	STF-001072-1	4993143	356839840	268	37	1.4	93.1	5.1	13.8	Human fetal astrocytes	Synaptosomes pHrodo red
Row 342	LP01-302-0_625	SP190705_01	8397	15	6	Data	450	1.39	0.4	2019-07-09	STF-001152	STF-001152-1	5044431	348916320	260	34	1.45	96.2	8.1	13.1	Human fetal astrocytes	Synaptosomes pHrodo red
Row 343	LP01-302-0_625	SP190705_01	8397	15	7	Data	450	1.39	0.85	2019-07-09	STF-001073	STF-001073-1	5367155	482303232	332	38	1.11	74	-18.3	11.4	Human fetal astrocytes	Synaptosomes pHrodo red
Row 344	LP01-302-0_625	SP190705_01	8397	15	8	Data	450	1.39	0.38	2019-07-09	STF-001153	STF-001153-1	5920055	390717920	293	41	1.52	100.8	-4	14	Human fetal astrocytes	Synaptosomes pHrodo red
Row 345	LP01-302-0_625	SP190705_01	8397	15	9	Data	450	1.39	0.5	2019-07-09	STF-001074	STF-001074-1	7489857	433440768	291	48	1.73	114.9	-3.3	16.5	Human fetal astrocytes	Synaptosomes pHrodo red
Row 346	LP01-302-0_625	SP190705_01	8397	15	10	Data	450	1.39	0.6	2019-07-09	STF-001154	STF-001154-1	6572154	407968704	294	42	1.61	107.2	-4.4	14.3	Human fetal astrocytes	Synaptosomes pHrodo red
Row 347	LP01-302-0_625	SP190705_01	8397	15	11	Data	450	1.39	0.52	2019-07-09	STF-001075	STF-001075-1	5907090	457189824	293	36	1.29	85.9	-4	12.3	Human fetal astrocytes	Synaptosomes pHrodo red
Row 348	LP01-302-0_625	SP190705_01	8397	15	12	Data	450	1.39	0.89	2019-07-09	STF-001155	STF-001155-1	6065026	432172480	285	46	1.4	93.3	-1.1	16.1	Human fetal astrocytes	Synaptosomes pHrodo red
Row 349	LP01-302-0_625	SP190705_01	8397	15	13	Data	450	1.39	0.42	2019-07-09	STF-001076	STF-001076-1	4989790	463176768	318	34	1.08	71.7	-13.2	10.7	Human fetal astrocytes	Synaptosomes pHrodo red
Row 350	LP01-302-0_625	SP190705_01	8397	15	14	Data	450	1.39	0.37	2019-07-09	STF-001156	STF-001156-1	7165331	470132832	303	47	1.52	101.4	-7.7	15.5	Human fetal astrocytes	Synaptosomes pHrodo red
Row 351	LP01-302-0_625	SP190705_01	8397	15	15	Data	450	1.39	0.24	2019-07-09	STF-001077	STF-001077-1	6632848	494269408	324	42	1.34	89.3	-15.4	13	Human fetal astrocytes	Synaptosomes pHrodo red
Row 352	LP01-302-0_625	SP190705_01	8397	15	16	Data	450	1.39	0.31	2019-07-09	STF-001157	STF-001157-1	7000502	483071072	323	47	1.45	96.4	-15	14.6	Human fetal astrocytes	Synaptosomes pHrodo red
Row 353	LP01-302-0_625	SP190705_01	8397	15	17	Data	450	1.39	0.39	2019-07-09	STF-001078	STF-001078-1	6405876	528434976	347	49	1.21	80.6	-23.9	14.1	Human fetal astrocytes	Synaptosomes pHrodo red
Row 354	LP01-302-0_625	SP190705_01	8397	15	18	Data	450	1.39	0.3	2019-07-09	STF-001158	STF-001158-1	6715477	523069280	336	45	1.28	85.4	-19.8	13.4	Human fetal astrocytes	Synaptosomes pHrodo red
Row 355	LP01-302-0_625	SP190705_01	8397	15	19	Data	450	1.39	0.37	2019-07-09	STF-001079	STF-001079-1	4986889	465180256	335	36	1.07	71.3	-19.4	10.7	Human fetal astrocytes	Synaptosomes pHrodo red
Row 356	LP01-302-0_625	SP190705_01	8397	15	20	Data	450	1.39	0.57	2019-07-09	STF-001159	STF-001159-1	8539379	550120128	321	51	1.55	103.3	-14.3	15.9	Human fetal astrocytes	Synaptosomes pHrodo red
Row 357	LP01-302-0_625	SP190705_01	8397	15	21	Data	450	1.39	0.19	2019-07-09	STF-001080	STF-001080-1	6262106	527385600	319	44	1.19	79	-13.6	13.8	Human fetal astrocytes	Synaptosomes pHrodo red
Row 358	LP01-302-0_625	SP190705_01	8397	15	22	Data	450	1.39	0.17	2019-07-09	STF-001160	STF-001160-1	9648843	545670848	307	58	1.77	117.6	-9.2	18.9	Human fetal astrocytes	Synaptosomes pHrodo red
Row 359	LP01-302-0_625	SP190705_01	8397	15	23	Positive Control				2019-07-09			0	305143680	177	0	0	0	38.5	0	Human fetal astrocytes	None
Row 360	LP01-302-0_625	SP190705_01	8397	15	24	Low Control				2019-07-09			374013	4079188	9	6	9.17	609.9	100.2	66.7	Human fetal astrocytes	Synaptosomes pHrodo red
Row 361	LP01-302-0_625	SP190705_01	8397	16	1	High Control				2019-07-09			5602063	332652128	300	40	1.68	112	-6.6	13.3	Human fetal astrocytes	Synaptosomes pHrodo red
Row 362	LP01-302-0_625	SP190705_01	8397	16	2	High Control				2019-07-09			5792682	289668640	266	43	2	133	5.9	16.2	Human fetal astrocytes	Synaptosomes pHrodo red
Row 363	LP01-302-0_625	SP190705_01	8397	16	3	Data	450	1.39	0.31	2019-07-09	STF-001230	STF-001230-1	6354194	347520608	293	48	1.83	121.6	-4	16.4	Human fetal astrocytes	Synaptosomes pHrodo red
Row 364	LP01-302-0_625	SP190705_01	8397	16	4	Data	450	1.39	0.35	2019-07-09	STF-001308	STF-001308-1	6161799	413366944	305	43	1.49	99.2	-8.4	14.1	Human fetal astrocytes	Synaptosomes pHrodo red
Row 365	LP01-302-0_625	SP190705_01	8397	16	5	Data	450	1.39	0.6	2019-07-09	STF-001231	STF-001231-1	6145571	360405152	281	42	1.71	113.4	0.4	14.9	Human fetal astrocytes	Synaptosomes pHrodo red
Row 366	LP01-302-0_625	SP190705_01	8397	16	6	Data	450	1.39	0.47	2019-07-09	STF-001309	STF-001309-1	8041960	432924800	318	55	1.86	123.6	-13.2	17.3	Human fetal astrocytes	Synaptosomes pHrodo red
Row 367	LP01-302-0_625	SP190705_01	8397	16	7	Data	450	1.39	0.41	2019-07-09	STF-001232	STF-001232-1	5822451	374335584	287	42	1.56	103.5	-1.8	14.6	Human fetal astrocytes	Synaptosomes pHrodo red
Row 368	LP01-302-0_625	SP190705_01	8397	16	8	Data	450	1.39	0.73	2019-07-09	STF-001310	STF-001310-1	5244338	383246848	270	38	1.37	91	4.4	14.1	Human fetal astrocytes	Synaptosomes pHrodo red
Row 369	LP01-302-0_625	SP190705_01	8397	16	9	Data	450	1.39	0.34	2019-07-09	STF-001233	STF-001233-1	7302216	414624224	299	55	1.76	117.1	-6.2	18.4	Human fetal astrocytes	Synaptosomes pHrodo red
Row 370	LP01-302-0_625	SP190705_01	8397	16	10	Data	450	1.39	0.51	2019-07-09	STF-001311	STF-001311-1	6936512	443902592	317	43	1.56	103.9	-12.8	13.6	Human fetal astrocytes	Synaptosomes pHrodo red
Row 371	LP01-302-0_625	SP190705_01	8397	16	11	Data	450	1.39	0.47	2019-07-09	STF-001234	STF-001234-1	5849609	462906080	331	45	1.26	84.1	-18	13.6	Human fetal astrocytes	Synaptosomes pHrodo red
Row 372	LP01-302-0_625	SP190705_01	8397	16	12	Data	450	1.39	0.48	2019-07-09	STF-001312	STF-001312-1	5668396	402539712	305	38	1.41	93.7	-8.4	12.5	Human fetal astrocytes	Synaptosomes pHrodo red
Row 373	LP01-302-0_625	SP190705_01	8397	16	13	Data	450	1.39	0.55	2019-07-09	STF-001235	STF-001235-1	8216658	477225760	316	46	1.72	114.5	-12.5	14.6	Human fetal astrocytes	Synaptosomes pHrodo red
Row 374	LP01-302-0_625	SP190705_01	8397	16	14	Data	450	1.39	0.39	2019-07-09	STF-001313	STF-001313-1	10094886	492761920	324	68	2.05	136.3	-15.4	21	Human fetal astrocytes	Synaptosomes pHrodo red
Row 375	LP01-302-0_625	SP190705_01	8397	16	15	Data	450	1.39	0.69	2019-07-09	STF-001236	STF-001236-1	5757956	471526624	336	38	1.22	81.2	-19.8	11.3	Human fetal astrocytes	Synaptosomes pHrodo red
Row 376	LP01-302-0_625	SP190705_01	8397	16	16	Data	450	1.39	0.73	2019-07-09	STF-001314	STF-001314-1	7938511	574646912	328	46	1.38	91.9	-16.9	14	Human fetal astrocytes	Synaptosomes pHrodo red
Row 377	LP01-302-0_625	SP190705_01	8397	16	17	Data	450	1.39	0.36	2019-07-09	STF-001237	STF-001237-1	5763027	495645344	333	39	1.16	77.3	-18.7	11.7	Human fetal astrocytes	Synaptosomes pHrodo red
Row 378	LP01-302-0_625	SP190705_01	8397	16	18	Data	450	1.39	0.3	2019-07-09	STF-001315	STF-001315-1	6107668	467650304	319	44	1.31	86.9	-13.6	13.8	Human fetal astrocytes	Synaptosomes pHrodo red
Row 379	LP01-302-0_625	SP190705_01	8397	16	19	Data	450	1.39	0.48	2019-07-09	STF-001238	STF-001238-1	6381411	481762048	334	44	1.32	88.1	-19.1	13.2	Human fetal astrocytes	Synaptosomes pHrodo red
Row 380	LP01-302-0_625	SP190705_01	8397	16	20	Data	450	1.39	0.36	2019-07-09	STF-001316	STF-001316-1	9043970	559492288	339	53	1.62	107.5	-20.9	15.6	Human fetal astrocytes	Synaptosomes pHrodo red
Row 381	LP01-302-0_625	SP190705_01	8397	16	21	Data	450	1.39	0.5	2019-07-09	STF-001239	STF-001239-1	8230910	493941568	296	49	1.67	110.8	-5.1	16.6	Human fetal astrocytes	Synaptosomes pHrodo red
Row 382	LP01-302-0_625	SP190705_01	8397	16	22	Data	450	1.39	0.38	2019-07-09	STF-001317	STF-001317-1	6320271	504099744	349	35	1.25	83.4	-24.6	10	Human fetal astrocytes	Synaptosomes pHrodo red
Row 383	LP01-302-0_625	SP190705_01	8397	16	23	Positive Control				2019-07-09			0	258105504	169	0	0	0	41.5	0	Human fetal astrocytes	None
Row 384	LP01-302-0_625	SP190705_01	8397	16	24	Low Control				2019-07-09			492628	4226480	10	8	11.66	775.3	99.8	80	Human fetal astrocytes	Synaptosomes pHrodo red
Row 385	LP01-302-1_25	SP190705_02	8396	1	1	High Control				2019-07-09			11596731	682409344	319	68	1.7	132	6.6	21.3	Human fetal astrocytes	Synaptosomes pHrodo red
Row 386	LP01-302-1_25	SP190705_02	8396	1	2	High Control				2019-07-09			10148496	649862720	296	59	1.56	121.3	13.5	19.9	Human fetal astrocytes	Synaptosomes pHrodo red
Row 387	LP01-302-1_25	SP190705_02	8396	1	3	Data	450	2.78	0.54	2019-07-09	STF-001001	STF-001001-1	13661864	655248640	273	68	2.08	161.9	20.5	24.9	Human fetal astrocytes	Synaptosomes pHrodo red
Row 388	LP01-302-1_25	SP190705_02	8396	1	4	Data	450	2.78	0.45	2019-07-09	STF-001081	STF-001081-1	10334228	693623616	340	61	1.49	115.7	0.3	17.9	Human fetal astrocytes	Synaptosomes pHrodo red
Row 389	LP01-302-1_25	SP190705_02	8396	1	5	Data	450	2.78	0.56	2019-07-09	STF-001002	STF-001002-1	13124378	829787840	342	75	1.58	122.8	-0.3	21.9	Human fetal astrocytes	Synaptosomes pHrodo red
Row 390	LP01-302-1_25	SP190705_02	8396	1	6	Data	450	2.78	0.36	2019-07-09	STF-001082	STF-001082-1	12743447	817891648	345	73	1.56	121	-1.2	21.2	Human fetal astrocytes	Synaptosomes pHrodo red
Row 391	LP01-302-1_25	SP190705_02	8396	1	7	Data	450	2.78	0.16	2019-07-09	STF-001003	STF-001003-1	13772053	883304384	382	77	1.56	121.1	-12.3	20.2	Human fetal astrocytes	Synaptosomes pHrodo red
Row 392	LP01-302-1_25	SP190705_02	8396	1	8	Data	450	2.78	0.58	2019-07-09	STF-001083	STF-001083-1	12585017	821801024	367	67	1.53	118.9	-7.8	18.3	Human fetal astrocytes	Synaptosomes pHrodo red
Row 393	LP01-302-1_25	SP190705_02	8396	1	9	Data	450	2.78	0.52	2019-07-09	STF-001004	STF-001004-1	11822504	740644416	346	66	1.6	124	-1.5	19.1	Human fetal astrocytes	Synaptosomes pHrodo red
Row 394	LP01-302-1_25	SP190705_02	8396	1	10	Data	450	2.78	0.91	2019-07-09	STF-001084	STF-001084-1	12090173	928634240	414	61	1.3	101.1	-22	14.7	Human fetal astrocytes	Synaptosomes pHrodo red
Row 395	LP01-302-1_25	SP190705_02	8396	1	11	Data	450	2.78	0.29	2019-07-09	STF-001005	STF-001005-1	11846766	870586304	383	58	1.36	105.7	-12.6	15.1	Human fetal astrocytes	Synaptosomes pHrodo red
Row 396	LP01-302-1_25	SP190705_02	8396	1	12	Data	450	2.78	0.46	2019-07-09	STF-001085	STF-001085-1	11651664	874707584	385	61	1.33	103.4	-13.2	15.8	Human fetal astrocytes	Synaptosomes pHrodo red
Row 397	LP01-302-1_25	SP190705_02	8396	1	13	Data	450	2.78	0.49	2019-07-09	STF-001006	STF-001006-1	8130378	851286592	398	50	0.96	74.2	-17.1	12.6	Human fetal astrocytes	Synaptosomes pHrodo red
Row 398	LP01-302-1_25	SP190705_02	8396	1	14	Data	450	2.78	0.82	2019-07-09	STF-001086	STF-001086-1	10466475	886776576	394	57	1.18	91.7	-15.9	14.5	Human fetal astrocytes	Synaptosomes pHrodo red
Row 399	LP01-302-1_25	SP190705_02	8396	1	15	Data	450	2.78	0.61	2019-07-09	STF-001007	STF-001007-1	11264462	869012800	375	63	1.3	100.7	-10.2	16.8	Human fetal astrocytes	Synaptosomes pHrodo red
Row 400	LP01-302-1_25	SP190705_02	8396	1	16	Data	450	2.78	1.05	2019-07-09	STF-001087	STF-001087-1	10863344	877070720	372	57	1.24	96.2	-9.3	15.3	Human fetal astrocytes	Synaptosomes pHrodo red
Row 401	LP01-302-1_25	SP190705_02	8396	1	17	Data	450	2.78	0.63	2019-07-09	STF-001008	STF-001008-1	12905509	916258624	389	64	1.41	109.4	-14.4	16.5	Human fetal astrocytes	Synaptosomes pHrodo red
Row 402	LP01-302-1_25	SP190705_02	8396	1	18	Data	450	2.78	0.9	2019-07-09	STF-001088	STF-001088-1	10218161	888182400	403	64	1.15	89.3	-18.6	15.9	Human fetal astrocytes	Synaptosomes pHrodo red
Row 403	LP01-302-1_25	SP190705_02	8396	1	19	Data	450	2.78	0.87	2019-07-09	STF-001009	STF-001009-1	11528316	838632832	364	57	1.37	106.8	-6.9	15.7	Human fetal astrocytes	Synaptosomes pHrodo red
Row 404	LP01-302-1_25	SP190705_02	8396	1	20	Data	450	2.78	0.4	2019-07-09	STF-001089	STF-001089-1	8622586	898501440	389	53	0.96	74.5	-14.4	13.6	Human fetal astrocytes	Synaptosomes pHrodo red
Row 405	LP01-302-1_25	SP190705_02	8396	1	21	Data	450	2.78	1.07	2019-07-09	STF-001010	STF-001010-1	10100386	815626048	380	57	1.24	96.2	-11.7	15	Human fetal astrocytes	Synaptosomes pHrodo red
Row 406	LP01-302-1_25	SP190705_02	8396	1	22	Data	450	2.78	0.28	2019-07-09	STF-001090	STF-001090-1	11043648	802744960	335	51	1.38	106.8	1.8	15.2	Human fetal astrocytes	Synaptosomes pHrodo red
Row 407	LP01-302-1_25	SP190705_02	8396	1	23	Positive Control				2019-07-09			0	415053312	206	0	0	0	40.6	0	Human fetal astrocytes	None
Row 408	LP01-302-1_25	SP190705_02	8396	1	24	Low Control				2019-07-09			279021	1908476	4	4	14.62	1135.4	101.4	100	Human fetal astrocytes	Synaptosomes pHrodo red
Row 409	LP01-302-1_25	SP190705_02	8396	2	1	High Control				2019-07-09			10211447	568386368	259	60	1.8	139.5	24.7	23.2	Human fetal astrocytes	Synaptosomes pHrodo red
Row 410	LP01-302-1_25	SP190705_02	8396	2	2	High Control				2019-07-09			10246553	711976640	344	70	1.44	111.8	-0.9	20.3	Human fetal astrocytes	Synaptosomes pHrodo red
Row 411	LP01-302-1_25	SP190705_02	8396	2	3	Data	450	2.78	0.67	2019-07-09	STF-001161	STF-001161-1	12120427	672455232	319	84	1.8	140	6.6	26.3	Human fetal astrocytes	Synaptosomes pHrodo red
Row 412	LP01-302-1_25	SP190705_02	8396	2	4	Data	450	2.78	1.07	2019-07-09	STF-001240	STF-001240-1	9724744	773645824	355	64	1.26	97.6	-4.2	18	Human fetal astrocytes	Synaptosomes pHrodo red
Row 413	LP01-302-1_25	SP190705_02	8396	2	5	Data	450	2.78	1.01	2019-07-09	STF-001162	STF-001162-1	15394579	899047040	371	81	1.71	133	-9	21.8	Human fetal astrocytes	Synaptosomes pHrodo red
Row 414	LP01-302-1_25	SP190705_02	8396	2	6	Data	450	2.78	3.34	2019-07-09	STF-001241	STF-001241-1	10019558	751888704	350	62	1.33	103.5	-2.7	17.7	Human fetal astrocytes	Synaptosomes pHrodo red
Row 415	LP01-302-1_25	SP190705_02	8396	2	7	Data	450	2.78	0.59	2019-07-09	STF-001163	STF-001163-1	13424397	776819456	353	80	1.73	134.2	-3.6	22.7	Human fetal astrocytes	Synaptosomes pHrodo red
Row 416	LP01-302-1_25	SP190705_02	8396	2	8	Data	450	2.78	0.51	2019-07-09	STF-001242	STF-001242-1	11470565	686085440	317	65	1.67	129.8	7.2	20.5	Human fetal astrocytes	Synaptosomes pHrodo red
Row 417	LP01-302-1_25	SP190705_02	8396	2	9	Data	450	2.78	0.78	2019-07-09	STF-001164	STF-001164-1	8274547	666126208	338	47	1.24	96.5	0.9	13.9	Human fetal astrocytes	Synaptosomes pHrodo red
Row 418	LP01-302-1_25	SP190705_02	8396	2	10	Data	450	2.78	0.96	2019-07-09	STF-001243	STF-001243-1	9630136	851730304	407	53	1.13	87.8	-19.8	13	Human fetal astrocytes	Synaptosomes pHrodo red
Row 419	LP01-302-1_25	SP190705_02	8396	2	11	Data	450	2.78	1.16	2019-07-09	STF-001165	STF-001165-1	12698760	848841280	396	75	1.5	116.2	-16.5	18.9	Human fetal astrocytes	Synaptosomes pHrodo red
Row 420	LP01-302-1_25	SP190705_02	8396	2	12	Data	450	2.78	0.75	2019-07-09	STF-001244	STF-001244-1	11923508	848975360	377	60	1.4	109.1	-10.8	15.9	Human fetal astrocytes	Synaptosomes pHrodo red
Row 421	LP01-302-1_25	SP190705_02	8396	2	13	Data	450	2.78	0.77	2019-07-09	STF-001166	STF-001166-1	9359371	804639808	380	53	1.16	90.3	-11.7	13.9	Human fetal astrocytes	Synaptosomes pHrodo red
Row 422	LP01-302-1_25	SP190705_02	8396	2	14	Data	450	2.78	0.9	2019-07-09	STF-001245	STF-001245-1	9439696	866824512	376	43	1.09	84.6	-10.5	11.4	Human fetal astrocytes	Synaptosomes pHrodo red
Row 423	LP01-302-1_25	SP190705_02	8396	2	15	Data	450	2.78	0.65	2019-07-09	STF-001167	STF-001167-1	14084140	867794176	379	73	1.62	126	-11.4	19.3	Human fetal astrocytes	Synaptosomes pHrodo red
Row 424	LP01-302-1_25	SP190705_02	8396	2	16	Data	450	2.78	1.22	2019-07-09	STF-001246	STF-001246-1	13783377	928124096	384	72	1.49	115.3	-12.9	18.8	Human fetal astrocytes	Synaptosomes pHrodo red
Row 425	LP01-302-1_25	SP190705_02	8396	2	17	Data	450	2.78	0.8	2019-07-09	STF-001168	STF-001168-1	10531152	832698176	372	59	1.26	98.2	-9.3	15.9	Human fetal astrocytes	Synaptosomes pHrodo red
Row 426	LP01-302-1_25	SP190705_02	8396	2	18	Data	450	2.78	0.55	2019-07-09	STF-001247	STF-001247-1	14662178	780510464	344	70	1.88	145.9	-0.9	20.3	Human fetal astrocytes	Synaptosomes pHrodo red
Row 427	LP01-302-1_25	SP190705_02	8396	2	19	Data	450	2.78	0.81	2019-07-09	STF-001169	STF-001169-1	9537830	844077056	409	52	1.13	87.8	-20.5	12.7	Human fetal astrocytes	Synaptosomes pHrodo red
Row 428	LP01-302-1_25	SP190705_02	8396	2	20	Data	450	2.78	0.99	2019-07-09	STF-001248	STF-001248-1	10572639	810709440	358	61	1.3	101.3	-5.1	17	Human fetal astrocytes	Synaptosomes pHrodo red
Row 429	LP01-302-1_25	SP190705_02	8396	2	21	Data	450	2.78	0.98	2019-07-09	STF-001170	STF-001170-1	6329456	852181120	392	31	0.74	57.7	-15.3	7.9	Human fetal astrocytes	Synaptosomes pHrodo red
Row 430	LP01-302-1_25	SP190705_02	8396	2	22	Data	450	2.78	0.82	2019-07-09	STF-001249	STF-001249-1	11031684	834292992	338	55	1.32	102.7	0.9	16.3	Human fetal astrocytes	Synaptosomes pHrodo red
Row 431	LP01-302-1_25	SP190705_02	8396	2	23	Positive Control				2019-07-09			0	363860064	195	0	0	0	43.9	0	Human fetal astrocytes	None
Row 432	LP01-302-1_25	SP190705_02	8396	2	24	Low Control				2019-07-09			104336	1641293	5	2	6.36	493.7	101.1	40	Human fetal astrocytes	Synaptosomes pHrodo red
Row 433	LP01-302-1_25	SP190705_02	8396	3	1	High Control				2019-07-09			11492756	776861120	377	73	1.48	114.9	-10.8	19.4	Human fetal astrocytes	Synaptosomes pHrodo red
Row 434	LP01-302-1_25	SP190705_02	8396	3	2	High Control				2019-07-09			12476209	773481600	348	68	1.61	125.3	-2.1	19.5	Human fetal astrocytes	Synaptosomes pHrodo red
Row 435	LP01-302-1_25	SP190705_02	8396	3	3	Data	450	2.78	0.59	2019-07-09	STF-001011	STF-001011-1	10622392	708987904	350	60	1.5	116.4	-2.7	17.1	Human fetal astrocytes	Synaptosomes pHrodo red
Row 436	LP01-302-1_25	SP190705_02	8396	3	4	Data	450	2.78	0.45	2019-07-09	STF-001091	STF-001091-1	11164704	734866752	339	70	1.52	118	0.6	20.6	Human fetal astrocytes	Synaptosomes pHrodo red
Row 437	LP01-302-1_25	SP190705_02	8396	3	5	Data	450	2.78	1.21	2019-07-09	STF-001012	STF-001012-1	10105770	725056896	355	61	1.39	108.2	-4.2	17.2	Human fetal astrocytes	Synaptosomes pHrodo red
Row 438	LP01-302-1_25	SP190705_02	8396	3	6	Data	450	2.78	0.9	2019-07-09	STF-001092	STF-001092-1	9913017	739543296	386	61	1.34	104.1	-13.5	15.8	Human fetal astrocytes	Synaptosomes pHrodo red
Row 439	LP01-302-1_25	SP190705_02	8396	3	7	Data	450	2.78	0.97	2019-07-09	STF-001013	STF-001013-1	8922970	767816512	383	54	1.16	90.3	-12.6	14.1	Human fetal astrocytes	Synaptosomes pHrodo red
Row 440	LP01-302-1_25	SP190705_02	8396	3	8	Data	450	2.78	0.54	2019-07-09	STF-001093	STF-001093-1	11938839	786369216	373	63	1.52	117.9	-9.6	16.9	Human fetal astrocytes	Synaptosomes pHrodo red
Row 441	LP01-302-1_25	SP190705_02	8396	3	9	Data	450	2.78	1.17	2019-07-09	STF-001014	STF-001014-1	6784368	673988864	349	36	1.01	78.2	-2.4	10.3	Human fetal astrocytes	Synaptosomes pHrodo red
Row 442	LP01-302-1_25	SP190705_02	8396	3	10	Data	450	2.78	0.89	2019-07-09	STF-001094	STF-001094-1	12056737	785832000	359	77	1.53	119.2	-5.4	21.4	Human fetal astrocytes	Synaptosomes pHrodo red
Row 443	LP01-302-1_25	SP190705_02	8396	3	11	Data	450	2.78	0.74	2019-07-09	STF-001015	STF-001015-1	12344764	817246592	378	63	1.51	117.3	-11.1	16.7	Human fetal astrocytes	Synaptosomes pHrodo red
Row 444	LP01-302-1_25	SP190705_02	8396	3	12	Data	450	2.78	1.02	2019-07-09	STF-001095	STF-001095-1	9535309	862635968	422	52	1.11	85.8	-24.4	12.3	Human fetal astrocytes	Synaptosomes pHrodo red
Row 445	LP01-302-1_25	SP190705_02	8396	3	13	Data	450	2.78	1.09	2019-07-09	STF-001016	STF-001016-1	10709088	764340608	366	57	1.4	108.8	-7.5	15.6	Human fetal astrocytes	Synaptosomes pHrodo red
Row 446	LP01-302-1_25	SP190705_02	8396	3	14	Data	450	2.78	1.06	2019-07-09	STF-001096	STF-001096-1	8951811	765786176	387	46	1.17	90.8	-13.8	11.9	Human fetal astrocytes	Synaptosomes pHrodo red
Row 447	LP01-302-1_25	SP190705_02	8396	3	15	Data	450	2.78	0.82	2019-07-09	STF-001017	STF-001017-1	9518993	806744768	384	48	1.18	91.6	-12.9	12.5	Human fetal astrocytes	Synaptosomes pHrodo red
Row 448	LP01-302-1_25	SP190705_02	8396	3	16	Data	450	2.78	0.48	2019-07-09	STF-001097	STF-001097-1	12277680	828321600	369	62	1.48	115.1	-8.4	16.8	Human fetal astrocytes	Synaptosomes pHrodo red
Row 449	LP01-302-1_25	SP190705_02	8396	3	17	Data	450	2.78	0.55	2019-07-09	STF-001018	STF-001018-1	8314336	768249024	382	43	1.08	84	-12.3	11.3	Human fetal astrocytes	Synaptosomes pHrodo red
Row 450	LP01-302-1_25	SP190705_02	8396	3	18	Data	450	2.78	0.48	2019-07-09	STF-001098	STF-001098-1	7575073	746955904	362	43	1.01	78.8	-6.3	11.9	Human fetal astrocytes	Synaptosomes pHrodo red
Row 451	LP01-302-1_25	SP190705_02	8396	3	19	Data	450	2.78	1.49	2019-07-09	STF-001019	STF-001019-1	8774174	733160512	351	47	1.2	92.9	-3	13.4	Human fetal astrocytes	Synaptosomes pHrodo red
Row 452	LP01-302-1_25	SP190705_02	8396	3	20	Data	450	2.78	0.4	2019-07-09	STF-001099	STF-001099-1	9126456	859521984	392	52	1.06	82.5	-15.3	13.3	Human fetal astrocytes	Synaptosomes pHrodo red
Row 453	LP01-302-1_25	SP190705_02	8396	3	21	Data	450	2.78	1.26	2019-07-09	STF-001020	STF-001020-1	9871552	869349952	392	53	1.14	88.2	-15.3	13.5	Human fetal astrocytes	Synaptosomes pHrodo red
Row 454	LP01-302-1_25	SP190705_02	8396	3	22	Data	450	2.78	1.06	2019-07-09	STF-001100	STF-001100-1	10497079	778955264	335	54	1.35	104.7	1.8	16.1	Human fetal astrocytes	Synaptosomes pHrodo red
Row 455	LP01-302-1_25	SP190705_02	8396	3	23	Positive Control				2019-07-09			0	407146592	220	0	0	0	36.4	0	Human fetal astrocytes	None
Row 456	LP01-302-1_25	SP190705_02	8396	3	24	Low Control				2019-07-09			328167	3099861	7	6	10.59	822.1	100.5	85.7	Human fetal astrocytes	Synaptosomes pHrodo red
Row 457	LP01-302-1_25	SP190705_02	8396	4	1	High Control				2019-07-09			11372046	659284608	333	73	1.72	134	2.4	21.9	Human fetal astrocytes	Synaptosomes pHrodo red
Row 458	LP01-302-1_25	SP190705_02	8396	4	2	High Control				2019-07-09			8439434	636771776	319	49	1.33	102.9	6.6	15.4	Human fetal astrocytes	Synaptosomes pHrodo red
Row 459	LP01-302-1_25	SP190705_02	8396	4	3	Data	450	2.78	2.09	2019-07-09	STF-001171	STF-001171-1	11608840	764336256	359	67	1.52	118	-5.4	18.7	Human fetal astrocytes	Synaptosomes pHrodo red
Row 460	LP01-302-1_25	SP190705_02	8396	4	4	Data	450	2.78	0.89	2019-07-09	STF-001250	STF-001250-1	12238075	808864896	380	68	1.51	117.5	-11.7	17.9	Human fetal astrocytes	Synaptosomes pHrodo red
Row 461	LP01-302-1_25	SP190705_02	8396	4	5	Data	450	2.78	0.43	2019-07-09	STF-001172	STF-001172-1	10568494	734619136	348	62	1.44	111.7	-2.1	17.8	Human fetal astrocytes	Synaptosomes pHrodo red
Row 462	LP01-302-1_25	SP190705_02	8396	4	6	Data	450	2.78	0.28	2019-07-09	STF-001251	STF-001251-1	9255363	806661376	374	49	1.15	89.1	-9.9	13.1	Human fetal astrocytes	Synaptosomes pHrodo red
Row 463	LP01-302-1_25	SP190705_02	8396	4	7	Data	450	2.78	0.92	2019-07-09	STF-001173	STF-001173-1	9874161	758770624	398	65	1.3	101.1	-17.1	16.3	Human fetal astrocytes	Synaptosomes pHrodo red
Row 464	LP01-302-1_25	SP190705_02	8396	4	8	Data	450	2.78	0.47	2019-07-09	STF-001252	STF-001252-1	9304063	709258880	359	54	1.31	101.9	-5.4	15	Human fetal astrocytes	Synaptosomes pHrodo red
Row 465	LP01-302-1_25	SP190705_02	8396	4	9	Data	450	2.78	1.2	2019-07-09	STF-001174	STF-001174-1	9948397	768197952	365	53	1.3	100.6	-7.2	14.5	Human fetal astrocytes	Synaptosomes pHrodo red
Row 466	LP01-302-1_25	SP190705_02	8396	4	10	Data	450	2.78	0.82	2019-07-09	STF-001253	STF-001253-1	12023074	755936640	360	72	1.59	123.5	-5.7	20	Human fetal astrocytes	Synaptosomes pHrodo red
Row 467	LP01-302-1_25	SP190705_02	8396	4	11	Data	450	2.78	0.93	2019-07-09	STF-001175	STF-001175-1	13258419	879912704	403	76	1.51	117	-18.6	18.9	Human fetal astrocytes	Synaptosomes pHrodo red
Row 468	LP01-302-1_25	SP190705_02	8396	4	12	Data	450	2.78	0.8	2019-07-09	STF-001254	STF-001254-1	10861824	811179904	377	59	1.34	104	-10.8	15.6	Human fetal astrocytes	Synaptosomes pHrodo red
Row 469	LP01-302-1_25	SP190705_02	8396	4	13	Data	450	2.78	1.28	2019-07-09	STF-001176	STF-001176-1	8954243	690555904	361	47	1.3	100.7	-6	13	Human fetal astrocytes	Synaptosomes pHrodo red
Row 470	LP01-302-1_25	SP190705_02	8396	4	14	Data	450	2.78	0.89	2019-07-09	STF-001255	STF-001255-1	6244052	770800000	368	41	0.81	62.9	-8.1	11.1	Human fetal astrocytes	Synaptosomes pHrodo red
Row 471	LP01-302-1_25	SP190705_02	8396	4	15	Data	450	2.78	0.71	2019-07-09	STF-001177	STF-001177-1	7447977	747789312	368	38	1	77.3	-8.1	10.3	Human fetal astrocytes	Synaptosomes pHrodo red
Row 472	LP01-302-1_25	SP190705_02	8396	4	16	Data	450	2.78	1.02	2019-07-09	STF-001256	STF-001256-1	10187679	814574784	360	50	1.25	97.1	-5.7	13.9	Human fetal astrocytes	Synaptosomes pHrodo red
Row 473	LP01-302-1_25	SP190705_02	8396	4	17	Data	450	2.78	0.74	2019-07-09	STF-001178	STF-001178-1	9514634	780762368	373	51	1.22	94.6	-9.6	13.7	Human fetal astrocytes	Synaptosomes pHrodo red
Row 474	LP01-302-1_25	SP190705_02	8396	4	18	Data	450	2.78	1.13	2019-07-09	STF-001257	STF-001257-1	9701430	753152384	365	53	1.29	100	-7.2	14.5	Human fetal astrocytes	Synaptosomes pHrodo red
Row 475	LP01-302-1_25	SP190705_02	8396	4	19	Data	450	2.78	0.81	2019-07-09	STF-001179	STF-001179-1	6855431	819518720	381	44	0.84	65	-12	11.5	Human fetal astrocytes	Synaptosomes pHrodo red
Row 476	LP01-302-1_25	SP190705_02	8396	4	20	Data	450	2.78	1.54	2019-07-09	STF-001258	STF-001258-1	12148211	875415424	393	62	1.39	107.8	-15.6	15.8	Human fetal astrocytes	Synaptosomes pHrodo red
Row 477	LP01-302-1_25	SP190705_02	8396	4	21	Data	450	2.78	0.51	2019-07-09	STF-001180	STF-001180-1	9699644	762595904	367	52	1.27	98.8	-7.8	14.2	Human fetal astrocytes	Synaptosomes pHrodo red
Row 478	LP01-302-1_25	SP190705_02	8396	4	22	Data	450	2.78	1.28	2019-07-09	STF-001259	STF-001259-1	8987559	836244992	345	46	1.07	83.5	-1.2	13.3	Human fetal astrocytes	Synaptosomes pHrodo red
Row 479	LP01-302-1_25	SP190705_02	8396	4	23	Positive Control				2019-07-09			0	389132160	199	0	0	0	42.7	0	Human fetal astrocytes	None
Row 480	LP01-302-1_25	SP190705_02	8396	4	24	Low Control				2019-07-09			424989	2910312	7	7	14.6	1134.1	100.5	100	Human fetal astrocytes	Synaptosomes pHrodo red
Row 481	LP01-302-1_25	SP190705_02	8396	5	1	High Control				2019-07-09			10280621	778345280	366	66	1.32	102.6	-7.5	18	Human fetal astrocytes	Synaptosomes pHrodo red
Row 482	LP01-302-1_25	SP190705_02	8396	5	2	High Control				2019-07-09			10545938	691735616	319	59	1.52	118.4	6.6	18.5	Human fetal astrocytes	Synaptosomes pHrodo red
Row 483	LP01-302-1_25	SP190705_02	8396	5	3	Data	450	2.78	1.04	2019-07-09	STF-001021	STF-001021-1	13569235	893332288	395	72	1.52	118	-16.2	18.2	Human fetal astrocytes	Synaptosomes pHrodo red
Row 484	LP01-302-1_25	SP190705_02	8396	5	4	Data	450	2.78	0.56	2019-07-09	STF-001101	STF-001101-1	10942021	734939392	373	77	1.49	115.6	-9.6	20.6	Human fetal astrocytes	Synaptosomes pHrodo red
Row 485	LP01-302-1_25	SP190705_02	8396	5	5	Data	450	2.78	1.2	2019-07-09	STF-001022	STF-001022-1	11099171	784727936	388	59	1.41	109.8	-14.1	15.2	Human fetal astrocytes	Synaptosomes pHrodo red
Row 486	LP01-302-1_25	SP190705_02	8396	5	6	Data	450	2.78	0.38	2019-07-09	STF-001102	STF-001102-1	14137974	841964800	400	75	1.68	130.4	-17.7	18.8	Human fetal astrocytes	Synaptosomes pHrodo red
Row 487	LP01-302-1_25	SP190705_02	8396	5	7	Data	450	2.78	0.28	2019-07-09	STF-001023	STF-001023-1	10945850	791873728	364	60	1.38	107.3	-6.9	16.5	Human fetal astrocytes	Synaptosomes pHrodo red
Row 488	LP01-302-1_25	SP190705_02	8396	5	8	Data	450	2.78	0.31	2019-07-09	STF-001103	STF-001103-1	9626893	779754624	384	50	1.23	95.9	-12.9	13	Human fetal astrocytes	Synaptosomes pHrodo red
Row 489	LP01-302-1_25	SP190705_02	8396	5	9	Data	450	2.78	1.3	2019-07-09	STF-001024	STF-001024-1	9605618	776883648	357	55	1.24	96	-4.8	15.4	Human fetal astrocytes	Synaptosomes pHrodo red
Row 490	LP01-302-1_25	SP190705_02	8396	5	10	Data	450	2.78	0.87	2019-07-09	STF-001104	STF-001104-1	10248617	860030336	388	62	1.19	92.5	-14.1	16	Human fetal astrocytes	Synaptosomes pHrodo red
Row 491	LP01-302-1_25	SP190705_02	8396	5	11	Data	450	2.78	0.54	2019-07-09	STF-001025	STF-001025-1	10593377	792835840	394	63	1.34	103.8	-15.9	16	Human fetal astrocytes	Synaptosomes pHrodo red
Row 492	LP01-302-1_25	SP190705_02	8396	5	12	Data	450	2.78	0.83	2019-07-09	STF-001105	STF-001105-1	10463649	777325376	377	55	1.35	104.5	-10.8	14.6	Human fetal astrocytes	Synaptosomes pHrodo red
Row 493	LP01-302-1_25	SP190705_02	8396	5	13	Data	450	2.78	0.91	2019-07-09	STF-001026	STF-001026-1	12012755	887056640	411	66	1.35	105.2	-21.1	16.1	Human fetal astrocytes	Synaptosomes pHrodo red
Row 494	LP01-302-1_25	SP190705_02	8396	5	14	Data	450	2.78	0.82	2019-07-09	STF-001106	STF-001106-1	10268323	829652608	376	56	1.24	96.1	-10.5	14.9	Human fetal astrocytes	Synaptosomes pHrodo red
Row 495	LP01-302-1_25	SP190705_02	8396	5	15	Data	450	2.78	0.77	2019-07-09	STF-001027	STF-001027-1	12550130	827756416	370	64	1.52	117.7	-8.7	17.3	Human fetal astrocytes	Synaptosomes pHrodo red
Row 496	LP01-302-1_25	SP190705_02	8396	5	16	Data	450	2.78	0.82	2019-07-09	STF-001107	STF-001107-1	6595937	784074624	390	39	0.84	65.3	-14.7	10	Human fetal astrocytes	Synaptosomes pHrodo red
Row 497	LP01-302-1_25	SP190705_02	8396	5	17	Data	450	2.78	1.31	2019-07-09	STF-001028	STF-001028-1	12468211	850509184	385	72	1.47	113.8	-13.2	18.7	Human fetal astrocytes	Synaptosomes pHrodo red
Row 498	LP01-302-1_25	SP190705_02	8396	5	18	Data	450	2.78	0.28	2019-07-09	STF-001108	STF-001108-1	9185324	786651328	384	55	1.17	90.7	-12.9	14.3	Human fetal astrocytes	Synaptosomes pHrodo red
Row 499	LP01-302-1_25	SP190705_02	8396	5	19	Data	450	2.78	0.6	2019-07-09	STF-001029	STF-001029-1	9430173	801888192	388	56	1.18	91.3	-14.1	14.4	Human fetal astrocytes	Synaptosomes pHrodo red
Row 500	LP01-302-1_25	SP190705_02	8396	5	20	Data	450	2.78	0.53	2019-07-09	STF-001109	STF-001109-1	6931299	833852224	394	45	0.83	64.6	-15.9	11.4	Human fetal astrocytes	Synaptosomes pHrodo red
Row 501	LP01-302-1_25	SP190705_02	8396	5	21	Data	450	2.78	1.07	2019-07-09	STF-001030	STF-001030-1	10940730	862636352	378	57	1.27	98.5	-11.1	15.1	Human fetal astrocytes	Synaptosomes pHrodo red
Row 502	LP01-302-1_25	SP190705_02	8396	5	22	Data	450	2.78	0.9	2019-07-09	STF-001110	STF-001110-1	8338600	873785792	405	45	0.95	74.1	-19.2	11.1	Human fetal astrocytes	Synaptosomes pHrodo red
Row 503	LP01-302-1_25	SP190705_02	8396	5	23	Positive Control				2019-07-09			0	443301088	226	0	0	0	34.6	0	Human fetal astrocytes	None
Row 504	LP01-302-1_25	SP190705_02	8396	5	24	Low Control				2019-07-09			511272	4281719	10	8	11.94	927.3	99.5	80	Human fetal astrocytes	Synaptosomes pHrodo red
Row 505	LP01-302-1_25	SP190705_02	8396	6	1	High Control				2019-07-09			7982943	673499584	338	53	1.19	92	0.9	15.7	Human fetal astrocytes	Synaptosomes pHrodo red
Row 506	LP01-302-1_25	SP190705_02	8396	6	2	High Control				2019-07-09			8580334	650618496	321	50	1.32	102.4	6	15.6	Human fetal astrocytes	Synaptosomes pHrodo red
Row 507	LP01-302-1_25	SP190705_02	8396	6	3	Data	450	2.78	0.67	2019-07-09	STF-001181	STF-001181-1	8575359	671606336	343	54	1.28	99.2	-0.6	15.7	Human fetal astrocytes	Synaptosomes pHrodo red
Row 508	LP01-302-1_25	SP190705_02	8396	6	4	Data	450	2.78	1.09	2019-07-09	STF-080497	STF-080497-2	9647436	757201792	347	63	1.27	98.9	-1.8	18.2	Human fetal astrocytes	Synaptosomes pHrodo red
Row 509	LP01-302-1_25	SP190705_02	8396	6	5	Data	450	2.78	0.38	2019-07-09	STF-001182	STF-001182-1	10538910	773643584	380	67	1.36	105.8	-11.7	17.6	Human fetal astrocytes	Synaptosomes pHrodo red
Row 510	LP01-302-1_25	SP190705_02	8396	6	6	Data	450	2.78	1.37	2019-07-09	STF-001260	STF-001260-1	13148105	743489024	338	68	1.77	137.3	0.9	20.1	Human fetal astrocytes	Synaptosomes pHrodo red
Row 511	LP01-302-1_25	SP190705_02	8396	6	7	Data	450	2.78	0.69	2019-07-09	STF-001183	STF-001183-1	12803981	807850112	379	80	1.58	123.1	-11.4	21.1	Human fetal astrocytes	Synaptosomes pHrodo red
Row 512	LP01-302-1_25	SP190705_02	8396	6	8	Data	450	2.78	0.43	2019-07-09	STF-001261	STF-001261-1	10066518	858348864	395	58	1.17	91.1	-16.2	14.7	Human fetal astrocytes	Synaptosomes pHrodo red
Row 513	LP01-302-1_25	SP190705_02	8396	6	9	Data	450	2.78	1.19	2019-07-09	STF-001184	STF-001184-1	13293613	783203520	358	76	1.7	131.8	-5.1	21.2	Human fetal astrocytes	Synaptosomes pHrodo red
Row 514	LP01-302-1_25	SP190705_02	8396	6	10	Data	450	2.78	1.09	2019-07-09	STF-001262	STF-001262-1	10901433	774502208	396	68	1.41	109.3	-16.5	17.2	Human fetal astrocytes	Synaptosomes pHrodo red
Row 515	LP01-302-1_25	SP190705_02	8396	6	11	Data	450	2.78	1.23	2019-07-09	STF-001185	STF-001185-1	9942998	787450752	384	56	1.26	98.1	-12.9	14.6	Human fetal astrocytes	Synaptosomes pHrodo red
Row 516	LP01-302-1_25	SP190705_02	8396	6	12	Data	450	2.78	1.66	2019-07-09	STF-001263	STF-001263-1	11936739	866580736	387	71	1.38	107	-13.8	18.3	Human fetal astrocytes	Synaptosomes pHrodo red
Row 517	LP01-302-1_25	SP190705_02	8396	6	13	Data	450	2.78	0.99	2019-07-09	STF-001186	STF-001186-1	10948360	821677184	365	55	1.33	103.5	-7.2	15.1	Human fetal astrocytes	Synaptosomes pHrodo red
Row 518	LP01-302-1_25	SP190705_02	8396	6	14	Data	450	2.78	1.37	2019-07-09	STF-001264	STF-001264-1	10828286	850572224	394	58	1.27	98.9	-15.9	14.7	Human fetal astrocytes	Synaptosomes pHrodo red
Row 519	LP01-302-1_25	SP190705_02	8396	6	15	Data	450	2.78	1.11	2019-07-09	STF-001187	STF-001187-1	8441202	824350720	360	48	1.02	79.5	-5.7	13.3	Human fetal astrocytes	Synaptosomes pHrodo red
Row 520	LP01-302-1_25	SP190705_02	8396	6	16	Data	450	2.78	0.28	2019-07-09	STF-001265	STF-001265-1	8149588	873307264	415	50	0.93	72.5	-22.3	12	Human fetal astrocytes	Synaptosomes pHrodo red
Row 521	LP01-302-1_25	SP190705_02	8396	6	17	Data	450	2.78	0.59	2019-07-09	STF-001188	STF-001188-1	11599709	809766656	373	61	1.43	111.2	-9.6	16.4	Human fetal astrocytes	Synaptosomes pHrodo red
Row 522	LP01-302-1_25	SP190705_02	8396	6	18	Data	450	2.78	0.74	2019-07-09	STF-001266	STF-001266-1	10050776	796623360	364	52	1.26	98	-6.9	14.3	Human fetal astrocytes	Synaptosomes pHrodo red
Row 523	LP01-302-1_25	SP190705_02	8396	6	19	Data	450	2.78	1.05	2019-07-09	STF-001189	STF-001189-1	7840293	824057024	386	42	0.95	73.9	-13.5	10.9	Human fetal astrocytes	Synaptosomes pHrodo red
Row 524	LP01-302-1_25	SP190705_02	8396	6	20	Data	450	2.78	0.79	2019-07-09	STF-001267	STF-001267-1	9000322	764156672	370	36	1.18	91.5	-8.7	9.7	Human fetal astrocytes	Synaptosomes pHrodo red
Row 525	LP01-302-1_25	SP190705_02	8396	6	21	Data	450	2.78	1.96	2019-07-09	STF-001190	STF-001190-1	11113785	893591936	411	57	1.24	96.6	-21.1	13.9	Human fetal astrocytes	Synaptosomes pHrodo red
Row 526	LP01-302-1_25	SP190705_02	8396	6	22	Data	450	2.78	0.44	2019-07-09	STF-001268	STF-001268-1	8881292	776140416	369	44	1.14	88.9	-8.4	11.9	Human fetal astrocytes	Synaptosomes pHrodo red
Row 527	LP01-302-1_25	SP190705_02	8396	6	23	Positive Control				2019-07-09			0	451375712	215	0	0	0	37.9	0	Human fetal astrocytes	None
Row 528	LP01-302-1_25	SP190705_02	8396	6	24	Low Control				2019-07-09			284657	2871876	8	5	9.91	769.8	100.2	62.5	Human fetal astrocytes	Synaptosomes pHrodo red
Row 529	LP01-302-1_25	SP190705_02	8396	7	1	High Control				2019-07-09			9426159	735030464	368	54	1.28	99.6	-8.1	14.7	Human fetal astrocytes	Synaptosomes pHrodo red
Row 530	LP01-302-1_25	SP190705_02	8396	7	2	High Control				2019-07-09			10605434	818186560	389	61	1.3	100.7	-14.4	15.7	Human fetal astrocytes	Synaptosomes pHrodo red
Row 531	LP01-302-1_25	SP190705_02	8396	7	3	Data	450	2.78	0.43	2019-07-09	STF-001031	STF-001031-1	12650638	721595200	356	72	1.75	136.1	-4.5	20.2	Human fetal astrocytes	Synaptosomes pHrodo red
Row 532	LP01-302-1_25	SP190705_02	8396	7	4	Data	450	2.78	0.74	2019-07-09	STF-001111	STF-001111-1	9467283	767751232	388	51	1.23	95.8	-14.1	13.1	Human fetal astrocytes	Synaptosomes pHrodo red
Row 533	LP01-302-1_25	SP190705_02	8396	7	5	Data	450	2.78	0.26	2019-07-09	STF-001032	STF-001032-1	10591291	751000832	375	58	1.41	109.5	-10.2	15.5	Human fetal astrocytes	Synaptosomes pHrodo red
Row 534	LP01-302-1_25	SP190705_02	8396	7	6	Data	450	2.78	0.87	2019-07-09	STF-001112	STF-001112-1	8194177	784151104	369	50	1.04	81.2	-8.4	13.6	Human fetal astrocytes	Synaptosomes pHrodo red
Row 535	LP01-302-1_25	SP190705_02	8396	7	7	Data	450	2.78	0.78	2019-07-09	STF-001033	STF-001033-1	9613269	736611136	366	57	1.31	101.4	-7.5	15.6	Human fetal astrocytes	Synaptosomes pHrodo red
Row 536	LP01-302-1_25	SP190705_02	8396	7	8	Data	450	2.78	1.57	2019-07-09	STF-001113	STF-001113-1	10521544	825664704	394	57	1.27	99	-15.9	14.5	Human fetal astrocytes	Synaptosomes pHrodo red
Row 537	LP01-302-1_25	SP190705_02	8396	7	9	Data	450	2.78	1.22	2019-07-09	STF-001034	STF-001034-1	8269214	787922304	403	52	1.05	81.5	-18.6	12.9	Human fetal astrocytes	Synaptosomes pHrodo red
Row 538	LP01-302-1_25	SP190705_02	8396	7	10	Data	450	2.78	0.8	2019-07-09	STF-001114	STF-001114-1	13938011	784466112	350	76	1.78	138	-2.7	21.7	Human fetal astrocytes	Synaptosomes pHrodo red
Row 539	LP01-302-1_25	SP190705_02	8396	7	11	Data	450	2.78	0.68	2019-07-09	STF-001035	STF-001035-1	11374576	852736192	408	56	1.33	103.6	-20.2	13.7	Human fetal astrocytes	Synaptosomes pHrodo red
Row 540	LP01-302-1_25	SP190705_02	8396	7	12	Data	450	2.78	0.61	2019-07-09	STF-001115	STF-001115-1	11577215	862706432	398	59	1.34	104.2	-17.1	14.8	Human fetal astrocytes	Synaptosomes pHrodo red
Row 541	LP01-302-1_25	SP190705_02	8396	7	13	Data	450	2.78	0.65	2019-07-09	STF-001036	STF-001036-1	12171825	839992960	400	69	1.45	112.5	-17.7	17.3	Human fetal astrocytes	Synaptosomes pHrodo red
Row 542	LP01-302-1_25	SP190705_02	8396	7	14	Data	450	2.78	0.87	2019-07-09	STF-001116	STF-001116-1	10451504	849522752	380	55	1.23	95.5	-11.7	14.5	Human fetal astrocytes	Synaptosomes pHrodo red
Row 543	LP01-302-1_25	SP190705_02	8396	7	15	Data	450	2.78	0.63	2019-07-09	STF-001037	STF-001037-1	12937412	898395776	406	71	1.44	111.8	-19.5	17.5	Human fetal astrocytes	Synaptosomes pHrodo red
Row 544	LP01-302-1_25	SP190705_02	8396	7	16	Data	450	2.78	0.5	2019-07-09	STF-001117	STF-001117-1	8966377	773736384	352	49	1.16	90	-3.3	13.9	Human fetal astrocytes	Synaptosomes pHrodo red
Row 545	LP01-302-1_25	SP190705_02	8396	7	17	Data	450	2.78	0.5	2019-07-09	STF-001038	STF-001038-1	10672257	858235264	406	62	1.24	96.6	-19.5	15.3	Human fetal astrocytes	Synaptosomes pHrodo red
Row 546	LP01-302-1_25	SP190705_02	8396	7	18	Data	450	2.78	1.07	2019-07-09	STF-001118	STF-001118-1	9381381	730823040	364	52	1.28	99.7	-6.9	14.3	Human fetal astrocytes	Synaptosomes pHrodo red
Row 547	LP01-302-1_25	SP190705_02	8396	7	19	Data	450	2.78	0.62	2019-07-09	STF-001039	STF-001039-1	10491426	848053632	386	61	1.24	96.1	-13.5	15.8	Human fetal astrocytes	Synaptosomes pHrodo red
Row 548	LP01-302-1_25	SP190705_02	8396	7	20	Data	450	2.78	0.61	2019-07-09	STF-001119	STF-001119-1	9883226	852370432	379	49	1.16	90	-11.4	12.9	Human fetal astrocytes	Synaptosomes pHrodo red
Row 549	LP01-302-1_25	SP190705_02	8396	7	21	Data	450	2.78	1.22	2019-07-09	STF-001040	STF-001040-1	9600960	897923392	393	45	1.07	83	-15.6	11.5	Human fetal astrocytes	Synaptosomes pHrodo red
Row 550	LP01-302-1_25	SP190705_02	8396	7	22	Data	450	2.78	0.3	2019-07-09	STF-001120	STF-001120-1	7140124	738298368	359	41	0.97	75.1	-5.4	11.4	Human fetal astrocytes	Synaptosomes pHrodo red
Row 551	LP01-302-1_25	SP190705_02	8396	7	23	Positive Control				2019-07-09			0	447468544	236	0	0	0	31.6	0	Human fetal astrocytes	None
Row 552	LP01-302-1_25	SP190705_02	8396	7	24	Low Control				2019-07-09			189546	2924274	7	3	6.48	503.4	100.5	42.9	Human fetal astrocytes	Synaptosomes pHrodo red
Row 553	LP01-302-1_25	SP190705_02	8396	8	1	High Control				2019-07-09			9421514	717410944	347	65	1.31	102	-1.8	18.7	Human fetal astrocytes	Synaptosomes pHrodo red
Row 554	LP01-302-1_25	SP190705_02	8396	8	2	High Control				2019-07-09			8267024	685220480	348	53	1.21	93.7	-2.1	15.2	Human fetal astrocytes	Synaptosomes pHrodo red
Row 555	LP01-302-1_25	SP190705_02	8396	8	3	Data	450	2.78	0.38	2019-07-09	STF-001191	STF-001191-1	12073663	786496768	366	72	1.54	119.2	-7.5	19.7	Human fetal astrocytes	Synaptosomes pHrodo red
Row 556	LP01-302-1_25	SP190705_02	8396	8	4	Data	450	2.78	1.12	2019-07-09	STF-001269	STF-001269-1	9817643	755099456	356	56	1.3	101	-4.5	15.7	Human fetal astrocytes	Synaptosomes pHrodo red
Row 557	LP01-302-1_25	SP190705_02	8396	8	5	Data	450	2.78	0.89	2019-07-09	STF-001192	STF-001192-1	12530678	780863040	377	77	1.6	124.6	-10.8	20.4	Human fetal astrocytes	Synaptosomes pHrodo red
Row 558	LP01-302-1_25	SP190705_02	8396	8	6	Data	450	2.78	1.91	2019-07-09	STF-001270	STF-001270-1	12252944	860362240	390	68	1.42	110.6	-14.7	17.4	Human fetal astrocytes	Synaptosomes pHrodo red
Row 559	LP01-302-1_25	SP190705_02	8396	8	7	Data	450	2.78	0.96	2019-07-09	STF-001193	STF-001193-1	8783342	743014464	377	59	1.18	91.8	-10.8	15.6	Human fetal astrocytes	Synaptosomes pHrodo red
Row 560	LP01-302-1_25	SP190705_02	8396	8	8	Data	450	2.78	0.83	2019-07-09	STF-001271	STF-001271-1	10334412	802402432	377	56	1.29	100	-10.8	14.9	Human fetal astrocytes	Synaptosomes pHrodo red
Row 561	LP01-302-1_25	SP190705_02	8396	8	9	Data	450	2.78	1.12	2019-07-09	STF-001194	STF-001194-1	12405710	781267840	395	68	1.59	123.3	-16.2	17.2	Human fetal astrocytes	Synaptosomes pHrodo red
Row 562	LP01-302-1_25	SP190705_02	8396	8	10	Data	450	2.78	1.32	2019-07-09	STF-001272	STF-001272-1	12916742	819519808	385	70	1.58	122.4	-13.2	18.2	Human fetal astrocytes	Synaptosomes pHrodo red
Row 563	LP01-302-1_25	SP190705_02	8396	8	11	Data	450	2.78	1.13	2019-07-09	STF-001195	STF-001195-1	10459467	882952384	407	63	1.18	92	-19.8	15.5	Human fetal astrocytes	Synaptosomes pHrodo red
Row 564	LP01-302-1_25	SP190705_02	8396	8	12	Data	450	2.78	0.99	2019-07-09	STF-001273	STF-001273-1	12283423	820085824	375	62	1.5	116.3	-10.2	16.5	Human fetal astrocytes	Synaptosomes pHrodo red
Row 565	LP01-302-1_25	SP190705_02	8396	8	13	Data	450	2.78	0.85	2019-07-09	STF-001196	STF-001196-1	9279612	834748288	401	50	1.11	86.3	-18	12.5	Human fetal astrocytes	Synaptosomes pHrodo red
Row 566	LP01-302-1_25	SP190705_02	8396	8	14	Data	450	2.78	0.91	2019-07-09	STF-001274	STF-001274-1	9831018	814417728	393	49	1.21	93.7	-15.6	12.5	Human fetal astrocytes	Synaptosomes pHrodo red
Row 567	LP01-302-1_25	SP190705_02	8396	8	15	Data	450	2.78	1.07	2019-07-09	STF-001197	STF-001197-1	10750807	835085120	380	59	1.29	100	-11.7	15.5	Human fetal astrocytes	Synaptosomes pHrodo red
Row 568	LP01-302-1_25	SP190705_02	8396	8	16	Data	450	2.78	0.88	2019-07-09	STF-001275	STF-001275-1	9322767	833507712	385	49	1.12	86.9	-13.2	12.7	Human fetal astrocytes	Synaptosomes pHrodo red
Row 569	LP01-302-1_25	SP190705_02	8396	8	17	Data	450	2.78	0.98	2019-07-09	STF-001198	STF-001198-1	10312881	823383040	381	60	1.25	97.3	-12	15.7	Human fetal astrocytes	Synaptosomes pHrodo red
Row 570	LP01-302-1_25	SP190705_02	8396	8	18	Data	450	2.78	1.33	2019-07-09	STF-001276	STF-001276-1	10339514	775212224	374	54	1.33	103.6	-9.9	14.4	Human fetal astrocytes	Synaptosomes pHrodo red
Row 571	LP01-302-1_25	SP190705_02	8396	8	19	Data	450	2.78	0.28	2019-07-09	STF-001199	STF-001199-1	9940470	847001536	385	55	1.17	91.1	-13.2	14.3	Human fetal astrocytes	Synaptosomes pHrodo red
Row 572	LP01-302-1_25	SP190705_02	8396	8	20	Data	450	2.78	1.24	2019-07-09	STF-001277	STF-001277-1	11546896	963831040	402	59	1.2	93	-18.3	14.7	Human fetal astrocytes	Synaptosomes pHrodo red
Row 573	LP01-302-1_25	SP190705_02	8396	8	21	Data	450	2.78	0.7	2019-07-09	STF-001200	STF-001200-1	11361696	867371200	350	54	1.31	101.7	-2.7	15.4	Human fetal astrocytes	Synaptosomes pHrodo red
Row 574	LP01-302-1_25	SP190705_02	8396	8	22	Data	450	2.78	0.31	2019-07-09	STF-001278	STF-001278-1	9229336	878312640	364	42	1.05	81.6	-6.9	11.5	Human fetal astrocytes	Synaptosomes pHrodo red
Row 575	LP01-302-1_25	SP190705_02	8396	8	23	Positive Control				2019-07-09			0	416696704	200	0	0	0	42.4	0	Human fetal astrocytes	None
Row 576	LP01-302-1_25	SP190705_02	8396	8	24	Low Control				2019-07-09			489050	4197383	4	3	11.65	904.8	101.4	75	Human fetal astrocytes	Synaptosomes pHrodo red
Row 577	LP01-302-1_25	SP190705_02	8396	9	1	High Control				2019-07-09			11244957	704171008	347	67	1.6	124	-1.8	19.3	Human fetal astrocytes	Synaptosomes pHrodo red
Row 578	LP01-302-1_25	SP190705_02	8396	9	2	High Control				2019-07-09			9699313	649827200	326	52	1.49	115.9	4.5	16	Human fetal astrocytes	Synaptosomes pHrodo red
Row 579	LP01-302-1_25	SP190705_02	8396	9	3	Data	450	2.78	0.36	2019-07-09	STF-001041	STF-001041-1	12107389	720042304	342	68	1.68	130.6	-0.3	19.9	Human fetal astrocytes	Synaptosomes pHrodo red
Row 580	LP01-302-1_25	SP190705_02	8396	9	4	Data	450	2.78	0.74	2019-07-09	STF-001121	STF-001121-1	12164998	786450880	379	68	1.55	120.1	-11.4	17.9	Human fetal astrocytes	Synaptosomes pHrodo red
Row 581	LP01-302-1_25	SP190705_02	8396	9	5	Data	450	2.78	1.88	2019-07-09	STF-001042	STF-001042-1	8634191	680817472	356	58	1.27	98.5	-4.5	16.3	Human fetal astrocytes	Synaptosomes pHrodo red
Row 582	LP01-302-1_25	SP190705_02	8396	9	6	Data	450	2.78	1.89	2019-07-09	STF-001122	STF-001122-1	11658428	857282496	393	70	1.36	105.6	-15.6	17.8	Human fetal astrocytes	Synaptosomes pHrodo red
Row 583	LP01-302-1_25	SP190705_02	8396	9	7	Data	450	2.78	0.38	2019-07-09	STF-001043	STF-001043-1	10071778	742763456	388	64	1.36	105.3	-14.1	16.5	Human fetal astrocytes	Synaptosomes pHrodo red
Row 584	LP01-302-1_25	SP190705_02	8396	9	8	Data	450	2.78	0.74	2019-07-09	STF-001123	STF-001123-1	12426717	788973952	374	74	1.58	122.3	-9.9	19.8	Human fetal astrocytes	Synaptosomes pHrodo red
Row 585	LP01-302-1_25	SP190705_02	8396	9	9	Data	450	2.78	0.61	2019-07-09	STF-001044	STF-001044-1	16683233	936995328	410	90	1.78	138.3	-20.8	22	Human fetal astrocytes	Synaptosomes pHrodo red
Row 586	LP01-302-1_25	SP190705_02	8396	9	10	Data	450	2.78	0.65	2019-07-09	STF-001124	STF-001124-1	11784098	850461440	401	68	1.39	107.6	-18	17	Human fetal astrocytes	Synaptosomes pHrodo red
Row 587	LP01-302-1_25	SP190705_02	8396	9	11	Data	450	2.78	0.83	2019-07-09	STF-001045	STF-001045-1	9765907	810754816	398	53	1.2	93.5	-17.1	13.3	Human fetal astrocytes	Synaptosomes pHrodo red
Row 588	LP01-302-1_25	SP190705_02	8396	9	12	Data	450	2.78	0.79	2019-07-09	STF-001125	STF-001125-1	9733138	807556864	393	52	1.21	93.6	-15.6	13.2	Human fetal astrocytes	Synaptosomes pHrodo red
Row 589	LP01-302-1_25	SP190705_02	8396	9	13	Data	450	2.78	1.12	2019-07-09	STF-001046	STF-001046-1	10543500	801629376	398	65	1.32	102.1	-17.1	16.3	Human fetal astrocytes	Synaptosomes pHrodo red
Row 590	LP01-302-1_25	SP190705_02	8396	9	14	Data	450	2.78	0.9	2019-07-09	STF-001126	STF-001126-1	9231364	829860224	398	47	1.11	86.4	-17.1	11.8	Human fetal astrocytes	Synaptosomes pHrodo red
Row 591	LP01-302-1_25	SP190705_02	8396	9	15	Data	450	2.78	0.95	2019-07-09	STF-001047	STF-001047-1	12412605	822202112	370	62	1.51	117.2	-8.7	16.8	Human fetal astrocytes	Synaptosomes pHrodo red
Row 592	LP01-302-1_25	SP190705_02	8396	9	16	Data	450	2.78	0.81	2019-07-09	STF-001127	STF-001127-1	10099942	851957760	387	52	1.19	92.1	-13.8	13.4	Human fetal astrocytes	Synaptosomes pHrodo red
Row 593	LP01-302-1_25	SP190705_02	8396	9	17	Data	450	2.78	0.83	2019-07-09	STF-001048	STF-001048-1	6867365	748764416	384	45	0.92	71.2	-12.9	11.7	Human fetal astrocytes	Synaptosomes pHrodo red
Row 594	LP01-302-1_25	SP190705_02	8396	9	18	Data	450	2.78	0.66	2019-07-09	STF-001128	STF-001128-1	12759822	894723648	389	66	1.43	110.8	-14.4	17	Human fetal astrocytes	Synaptosomes pHrodo red
Row 595	LP01-302-1_25	SP190705_02	8396	9	19	Data	450	2.78	0.66	2019-07-09	STF-001049	STF-001049-1	8908280	975826944	435	47	0.91	70.9	-28.3	10.8	Human fetal astrocytes	Synaptosomes pHrodo red
Row 596	LP01-302-1_25	SP190705_02	8396	9	20	Data	450	2.78	1.02	2019-07-09	STF-001129	STF-001129-1	10097882	833331008	372	55	1.21	94.1	-9.3	14.8	Human fetal astrocytes	Synaptosomes pHrodo red
Row 597	LP01-302-1_25	SP190705_02	8396	9	21	Data	450	2.78	0.68	2019-07-09	STF-001050	STF-001050-1	10301340	881467584	385	55	1.17	90.8	-13.2	14.3	Human fetal astrocytes	Synaptosomes pHrodo red
Row 598	LP01-302-1_25	SP190705_02	8396	9	22	Data	450	2.78	1.24	2019-07-09	STF-001130	STF-001130-1	9075632	885209984	390	47	1.03	79.6	-14.7	12.1	Human fetal astrocytes	Synaptosomes pHrodo red
Row 599	LP01-302-1_25	SP190705_02	8396	9	23	Positive Control				2019-07-09			0	474296672	231	0	0	0	33.1	0	Human fetal astrocytes	None
Row 600	LP01-302-1_25	SP190705_02	8396	9	24	Low Control				2019-07-09			681358	6373214	12	8	10.69	830.3	98.9	66.7	Human fetal astrocytes	Synaptosomes pHrodo red
Row 601	LP01-302-1_25	SP190705_02	8396	10	1	High Control				2019-07-09			11944487	793272384	369	68	1.51	116.9	-8.4	18.4	Human fetal astrocytes	Synaptosomes pHrodo red
Row 602	LP01-302-1_25	SP190705_02	8396	10	2	High Control				2019-07-09			12390491	798519488	371	75	1.55	120.5	-9	20.2	Human fetal astrocytes	Synaptosomes pHrodo red
Row 603	LP01-302-1_25	SP190705_02	8396	10	3	Data	450	2.78	1.21	2019-07-09	STF-001201	STF-001201-1	13034211	713863808	341	78	1.83	141.8	0	22.9	Human fetal astrocytes	Synaptosomes pHrodo red
Row 604	LP01-302-1_25	SP190705_02	8396	10	4	Data	450	2.78	1.33	2019-07-09	STF-001279	STF-001279-1	13191769	824356352	392	73	1.6	124.3	-15.3	18.6	Human fetal astrocytes	Synaptosomes pHrodo red
Row 605	LP01-302-1_25	SP190705_02	8396	10	5	Data	450	2.78	0.88	2019-07-09	STF-001202	STF-001202-1	16114078	913489344	381	88	1.76	137	-12	23.1	Human fetal astrocytes	Synaptosomes pHrodo red
Row 606	LP01-302-1_25	SP190705_02	8396	10	6	Data	450	2.78	1.09	2019-07-09	STF-001280	STF-001280-1	15071534	943080704	415	80	1.6	124.1	-22.3	19.3	Human fetal astrocytes	Synaptosomes pHrodo red
Row 607	LP01-302-1_25	SP190705_02	8396	10	7	Data	450	2.78	0.44	2019-07-09	STF-001203	STF-001203-1	11857194	806810368	389	65	1.47	114.1	-14.4	16.7	Human fetal astrocytes	Synaptosomes pHrodo red
Row 608	LP01-302-1_25	SP190705_02	8396	10	8	Data	450	2.78	1.16	2019-07-09	STF-001281	STF-001281-1	12120460	802468160	380	76	1.51	117.3	-11.7	20	Human fetal astrocytes	Synaptosomes pHrodo red
Row 609	LP01-302-1_25	SP190705_02	8396	10	9	Data	450	2.78	0.77	2019-07-09	STF-001204	STF-001204-1	9016840	797341184	398	55	1.13	87.8	-17.1	13.8	Human fetal astrocytes	Synaptosomes pHrodo red
Row 610	LP01-302-1_25	SP190705_02	8396	10	10	Data	450	2.78	1.01	2019-07-09	STF-078950	STF-078950-2	11335889	879836416	426	74	1.29	100.1	-25.6	17.4	Human fetal astrocytes	Synaptosomes pHrodo red
Row 611	LP01-302-1_25	SP190705_02	8396	10	11	Data	450	2.78	0.62	2019-07-09	STF-001205	STF-001205-1	10871588	818685056	388	63	1.33	103.1	-14.1	16.2	Human fetal astrocytes	Synaptosomes pHrodo red
Row 612	LP01-302-1_25	SP190705_02	8396	10	12	Data	450	2.78	0.49	2019-07-09	STF-001282	STF-001282-1	7814432	745229120	384	50	1.05	81.4	-12.9	13	Human fetal astrocytes	Synaptosomes pHrodo red
Row 613	LP01-302-1_25	SP190705_02	8396	10	13	Data	450	2.78	1.27	2019-07-09	STF-001206	STF-001206-1	11156086	879981952	385	59	1.27	98.5	-13.2	15.3	Human fetal astrocytes	Synaptosomes pHrodo red
Row 614	LP01-302-1_25	SP190705_02	8396	10	14	Data	450	2.78	0.55	2019-07-09	STF-001283	STF-001283-1	9428118	853595904	404	46	1.1	85.8	-18.9	11.4	Human fetal astrocytes	Synaptosomes pHrodo red
Row 615	LP01-302-1_25	SP190705_02	8396	10	15	Data	450	2.78	0.96	2019-07-09	STF-001207	STF-001207-1	11270670	862119104	424	67	1.31	101.5	-25	15.8	Human fetal astrocytes	Synaptosomes pHrodo red
Row 616	LP01-302-1_25	SP190705_02	8396	10	16	Data	450	2.78	1.04	2019-07-09	STF-001284	STF-001284-1	10609107	858942336	398	56	1.24	95.9	-17.1	14.1	Human fetal astrocytes	Synaptosomes pHrodo red
Row 617	LP01-302-1_25	SP190705_02	8396	10	17	Data	450	2.78	0.5	2019-07-09	STF-001208	STF-001208-1	10700858	897401792	406	59	1.19	92.6	-19.5	14.5	Human fetal astrocytes	Synaptosomes pHrodo red
Row 618	LP01-302-1_25	SP190705_02	8396	10	18	Data	450	2.78	0.95	2019-07-09	STF-001285	STF-001285-1	7976974	846768320	422	44	0.94	73.2	-24.4	10.4	Human fetal astrocytes	Synaptosomes pHrodo red
Row 619	LP01-302-1_25	SP190705_02	8396	10	19	Data	450	2.78	1	2019-07-09	STF-001209	STF-001209-1	8296050	776489920	366	40	1.07	83	-7.5	10.9	Human fetal astrocytes	Synaptosomes pHrodo red
Row 620	LP01-302-1_25	SP190705_02	8396	10	20	Data	450	2.78	0.97	2019-07-09	STF-001286	STF-001286-1	11454107	831824576	374	54	1.38	106.9	-9.9	14.4	Human fetal astrocytes	Synaptosomes pHrodo red
Row 621	LP01-302-1_25	SP190705_02	8396	10	21	Data	450	2.78	0.71	2019-07-09	STF-001210	STF-001210-1	11044111	935966528	374	46	1.18	91.6	-9.9	12.3	Human fetal astrocytes	Synaptosomes pHrodo red
Row 622	LP01-302-1_25	SP190705_02	8396	10	22	Data	450	2.78	0.92	2019-07-09	STF-001287	STF-001287-1	10664178	889600064	381	46	1.2	93.1	-12	12.1	Human fetal astrocytes	Synaptosomes pHrodo red
Row 623	LP01-302-1_25	SP190705_02	8396	10	23	Positive Control				2019-07-09			195310	414501600	222	2	0.05	3.7	35.8	0.9	Human fetal astrocytes	None
Row 624	LP01-302-1_25	SP190705_02	8396	10	24	Low Control				2019-07-09			383607	4777685	11	6	8.03	623.5	99.2	54.5	Human fetal astrocytes	Synaptosomes pHrodo red
Row 625	LP01-302-1_25	SP190705_02	8396	11	1	High Control				2019-07-09			7947874	782046784	360	40	1.02	78.9	-5.7	11.1	Human fetal astrocytes	Synaptosomes pHrodo red
Row 626	LP01-302-1_25	SP190705_02	8396	11	2	High Control				2019-07-09			6957039	688824000	330	52	1.01	78.4	3.3	15.8	Human fetal astrocytes	Synaptosomes pHrodo red
Row 627	LP01-302-1_25	SP190705_02	8396	11	3	Data	450	2.78	0.52	2019-07-09	STF-001051	STF-001051-1	10821177	774782208	372	73	1.4	108.5	-9.3	19.6	Human fetal astrocytes	Synaptosomes pHrodo red
Row 628	LP01-302-1_25	SP190705_02	8396	11	4	Data	450	2.78	0.81	2019-07-09	STF-001131	STF-001131-1	14731340	812948544	358	88	1.81	140.7	-5.1	24.6	Human fetal astrocytes	Synaptosomes pHrodo red
Row 629	LP01-302-1_25	SP190705_02	8396	11	5	Data	450	2.78	1.02	2019-07-09	STF-001052	STF-001052-1	11067187	767425472	358	62	1.44	112	-5.1	17.3	Human fetal astrocytes	Synaptosomes pHrodo red
Row 630	LP01-302-1_25	SP190705_02	8396	11	6	Data	450	2.78	0.67	2019-07-09	STF-001132	STF-001132-1	11539879	716955136	372	67	1.61	125	-9.3	18	Human fetal astrocytes	Synaptosomes pHrodo red
Row 631	LP01-302-1_25	SP190705_02	8396	11	7	Data	450	2.78	0.89	2019-07-09	STF-001053	STF-001053-1	9837864	803666624	381	55	1.22	95.1	-12	14.4	Human fetal astrocytes	Synaptosomes pHrodo red
Row 632	LP01-302-1_25	SP190705_02	8396	11	8	Data	450	2.78	0.37	2019-07-09	STF-001133	STF-001133-1	11819961	797542528	379	69	1.48	115.1	-11.4	18.2	Human fetal astrocytes	Synaptosomes pHrodo red
Row 633	LP01-302-1_25	SP190705_02	8396	11	9	Data	450	2.78	1.17	2019-07-09	STF-001054	STF-001054-1	10821755	825368640	398	59	1.31	101.8	-17.1	14.8	Human fetal astrocytes	Synaptosomes pHrodo red
Row 634	LP01-302-1_25	SP190705_02	8396	11	10	Data	450	2.78	0.32	2019-07-09	STF-001134	STF-001134-1	8511895	728560064	366	47	1.17	90.7	-7.5	12.8	Human fetal astrocytes	Synaptosomes pHrodo red
Row 635	LP01-302-1_25	SP190705_02	8396	11	11	Data	450	2.78	0.71	2019-07-09	STF-001055	STF-001055-1	14203381	828550144	381	77	1.71	133.1	-12	20.2	Human fetal astrocytes	Synaptosomes pHrodo red
Row 636	LP01-302-1_25	SP190705_02	8396	11	12	Data	450	2.78	0.93	2019-07-09	STF-001135	STF-001135-1	11400632	863103680	404	65	1.32	102.6	-18.9	16.1	Human fetal astrocytes	Synaptosomes pHrodo red
Row 637	LP01-302-1_25	SP190705_02	8396	11	13	Data	450	2.78	0.37	2019-07-09	STF-001056	STF-001056-1	9861755	773552192	356	48	1.27	99	-4.5	13.5	Human fetal astrocytes	Synaptosomes pHrodo red
Row 638	LP01-302-1_25	SP190705_02	8396	11	14	Data	450	2.78	0.72	2019-07-09	STF-001136	STF-001136-1	8483450	830117632	410	52	1.02	79.4	-20.8	12.7	Human fetal astrocytes	Synaptosomes pHrodo red
Row 639	LP01-302-1_25	SP190705_02	8396	11	15	Data	450	2.78	1.29	2019-07-09	STF-001057	STF-001057-1	6534351	807921792	402	45	0.81	62.8	-18.3	11.2	Human fetal astrocytes	Synaptosomes pHrodo red
Row 640	LP01-302-1_25	SP190705_02	8396	11	16	Data	450	2.78	0.93	2019-07-09	STF-001137	STF-001137-1	13582452	928803264	415	70	1.46	113.6	-22.3	16.9	Human fetal astrocytes	Synaptosomes pHrodo red
Row 641	LP01-302-1_25	SP190705_02	8396	11	17	Data	450	2.78	0.55	2019-07-09	STF-001058	STF-001058-1	9540428	812009728	360	48	1.17	91.2	-5.7	13.3	Human fetal astrocytes	Synaptosomes pHrodo red
Row 642	LP01-302-1_25	SP190705_02	8396	11	18	Data	450	2.78	0.35	2019-07-09	STF-001138	STF-001138-1	10284059	834773376	378	54	1.23	95.7	-11.1	14.3	Human fetal astrocytes	Synaptosomes pHrodo red
Row 643	LP01-302-1_25	SP190705_02	8396	11	19	Data	450	2.78	0.96	2019-07-09	STF-001059	STF-001059-1	11398331	848562176	375	56	1.34	104.3	-10.2	14.9	Human fetal astrocytes	Synaptosomes pHrodo red
Row 644	LP01-302-1_25	SP190705_02	8396	11	20	Data	450	2.78	0.63	2019-07-09	STF-001139	STF-001139-1	9121628	932971712	399	43	0.98	75.9	-17.4	10.8	Human fetal astrocytes	Synaptosomes pHrodo red
Row 645	LP01-302-1_25	SP190705_02	8396	11	21	Data	450	2.78	0.63	2019-07-09	STF-001060	STF-001060-1	10426210	827287104	387	54	1.26	97.9	-13.8	14	Human fetal astrocytes	Synaptosomes pHrodo red
Row 646	LP01-302-1_25	SP190705_02	8396	11	22	Data	450	2.78	1.44	2019-07-09	STF-001140	STF-001140-1	6058555	767993856	351	30	0.79	61.3	-3	8.5	Human fetal astrocytes	Synaptosomes pHrodo red
Row 647	LP01-302-1_25	SP190705_02	8396	11	23	Positive Control				2019-07-09			0	434643264	230	0	0	0	33.4	0	Human fetal astrocytes	None
Row 648	LP01-302-1_25	SP190705_02	8396	11	24	Low Control				2019-07-09			324037	4226409	9	5	7.67	595.4	99.8	55.6	Human fetal astrocytes	Synaptosomes pHrodo red
Row 649	LP01-302-1_25	SP190705_02	8396	12	1	High Control				2019-07-09			13362194	738328384	326	69	1.81	140.5	4.5	21.2	Human fetal astrocytes	Synaptosomes pHrodo red
Row 650	LP01-302-1_25	SP190705_02	8396	12	2	High Control				2019-07-09			12327327	711519872	324	72	1.73	134.5	5.1	22.2	Human fetal astrocytes	Synaptosomes pHrodo red
Row 651	LP01-302-1_25	SP190705_02	8396	12	3	Data	450	2.78	0.99	2019-07-09	STF-001211	STF-001211-1	10761322	686667008	329	66	1.57	121.7	3.6	20.1	Human fetal astrocytes	Synaptosomes pHrodo red
Row 652	LP01-302-1_25	SP190705_02	8396	12	4	Data	450	2.78	1.17	2019-07-09	STF-001288	STF-001288-1	8330265	680848000	333	48	1.22	95	2.4	14.4	Human fetal astrocytes	Synaptosomes pHrodo red
Row 653	LP01-302-1_25	SP190705_02	8396	12	5	Data	450	2.78	0.85	2019-07-09	STF-089963	STF-089963-2	13486682	846476416	390	75	1.59	123.7	-14.7	19.2	Human fetal astrocytes	Synaptosomes pHrodo red
Row 654	LP01-302-1_25	SP190705_02	8396	12	6	Data	450	2.78	0.66	2019-07-09	STF-001289	STF-001289-1	11662546	840303104	386	70	1.39	107.8	-13.5	18.1	Human fetal astrocytes	Synaptosomes pHrodo red
Row 655	LP01-302-1_25	SP190705_02	8396	12	7	Data	450	2.78	1.09	2019-07-09	STF-001212	STF-001212-1	12837644	886358144	416	74	1.45	112.5	-22.6	17.8	Human fetal astrocytes	Synaptosomes pHrodo red
Row 656	LP01-302-1_25	SP190705_02	8396	12	8	Data	450	2.78	0.7	2019-07-09	STF-001290	STF-001290-1	11114833	717000768	364	57	1.55	120.4	-6.9	15.7	Human fetal astrocytes	Synaptosomes pHrodo red
Row 657	LP01-302-1_25	SP190705_02	8396	12	9	Data	450	2.78	0.96	2019-07-09	STF-001213	STF-001213-1	9561050	844173312	396	53	1.13	88	-16.5	13.4	Human fetal astrocytes	Synaptosomes pHrodo red
Row 658	LP01-302-1_25	SP190705_02	8396	12	10	Data	450	2.78	0.84	2019-07-09	STF-001291	STF-001291-1	12373841	881838016	408	65	1.4	109	-20.2	15.9	Human fetal astrocytes	Synaptosomes pHrodo red
Row 659	LP01-302-1_25	SP190705_02	8396	12	11	Data	450	2.78	1.34	2019-07-09	STF-001214	STF-001214-1	12446724	960224896	419	62	1.3	100.7	-23.5	14.8	Human fetal astrocytes	Synaptosomes pHrodo red
Row 660	LP01-302-1_25	SP190705_02	8396	12	12	Data	450	2.78	1.29	2019-07-09	STF-001292	STF-001292-1	11287857	849139840	389	60	1.33	103.2	-14.4	15.4	Human fetal astrocytes	Synaptosomes pHrodo red
Row 661	LP01-302-1_25	SP190705_02	8396	12	13	Data	450	2.78	1.26	2019-07-09	STF-001215	STF-001215-1	9449778	827321408	400	52	1.14	88.7	-17.7	13	Human fetal astrocytes	Synaptosomes pHrodo red
Row 662	LP01-302-1_25	SP190705_02	8396	12	14	Data	450	2.78	1.43	2019-07-09	STF-001293	STF-001293-1	9004664	869242240	407	49	1.04	80.4	-19.8	12	Human fetal astrocytes	Synaptosomes pHrodo red
Row 663	LP01-302-1_25	SP190705_02	8396	12	15	Data	450	2.78	0.9	2019-07-09	STF-001216	STF-001216-1	12359460	917929152	413	66	1.35	104.6	-21.7	16	Human fetal astrocytes	Synaptosomes pHrodo red
Row 664	LP01-302-1_25	SP190705_02	8396	12	16	Data	450	2.78	0.63	2019-07-09	STF-001294	STF-001294-1	9399402	839631488	399	51	1.12	86.9	-17.4	12.8	Human fetal astrocytes	Synaptosomes pHrodo red
Row 665	LP01-302-1_25	SP190705_02	8396	12	17	Data	450	2.78	1.03	2019-07-09	STF-001217	STF-001217-1	9091001	811185024	385	52	1.12	87	-13.2	13.5	Human fetal astrocytes	Synaptosomes pHrodo red
Row 666	LP01-302-1_25	SP190705_02	8396	12	18	Data	450	2.78	0.51	2019-07-09	STF-001295	STF-001295-1	9275643	871746816	403	46	1.06	82.6	-18.6	11.4	Human fetal astrocytes	Synaptosomes pHrodo red
Row 667	LP01-302-1_25	SP190705_02	8396	12	19	Data	450	2.78	0.81	2019-07-09	STF-001218	STF-001218-1	8801419	866454336	404	52	1.02	78.9	-18.9	12.9	Human fetal astrocytes	Synaptosomes pHrodo red
Row 668	LP01-302-1_25	SP190705_02	8396	12	20	Data	450	2.78	0.87	2019-07-09	STF-001296	STF-001296-1	9019013	842556992	372	49	1.07	83.1	-9.3	13.2	Human fetal astrocytes	Synaptosomes pHrodo red
Row 669	LP01-302-1_25	SP190705_02	8396	12	21	Data	450	2.78	0.96	2019-07-09	STF-001219	STF-001219-1	10130266	931264512	414	53	1.09	84.5	-22	12.8	Human fetal astrocytes	Synaptosomes pHrodo red
Row 670	LP01-302-1_25	SP190705_02	8396	12	22	Data	450	2.78	0.69	2019-07-09	STF-001297	STF-001297-1	8972422	829637632	381	49	1.08	84	-12	12.9	Human fetal astrocytes	Synaptosomes pHrodo red
Row 671	LP01-302-1_25	SP190705_02	8396	12	23	Positive Control				2019-07-09			226298	409493536	206	1	0.06	4.3	40.6	0.5	Human fetal astrocytes	None
Row 672	LP01-302-1_25	SP190705_02	8396	12	24	Low Control				2019-07-09			61755	499675	1	1	12.36	959.8	102.3	100	Human fetal astrocytes	Synaptosomes pHrodo red
Row 673	LP01-302-1_25	SP190705_02	8396	13	1	High Control				2019-07-09			11776734	674949952	330	67	1.74	135.5	3.3	20.3	Human fetal astrocytes	Synaptosomes pHrodo red
Row 674	LP01-302-1_25	SP190705_02	8396	13	2	High Control				2019-07-09			11564542	832080896	412	60	1.39	107.9	-21.4	14.6	Human fetal astrocytes	Synaptosomes pHrodo red
Row 675	LP01-302-1_25	SP190705_02	8396	13	3	Data	450	2.78	0.55	2019-07-09	STF-001061	STF-001061-1	15426783	796840640	342	84	1.94	150.3	-0.3	24.6	Human fetal astrocytes	Synaptosomes pHrodo red
Row 676	LP01-302-1_25	SP190705_02	8396	13	4	Data	450	2.78	0.32	2019-07-09	STF-001141	STF-001141-1	10718422	760419840	354	69	1.41	109.5	-3.9	19.5	Human fetal astrocytes	Synaptosomes pHrodo red
Row 677	LP01-302-1_25	SP190705_02	8396	13	5	Data	450	2.78	0.75	2019-07-09	STF-001062	STF-001062-1	12954774	833366272	397	76	1.55	120.7	-16.8	19.1	Human fetal astrocytes	Synaptosomes pHrodo red
Row 678	LP01-302-1_25	SP190705_02	8396	13	6	Data	450	2.78	0.73	2019-07-09	STF-001142	STF-001142-1	13082441	884651712	387	73	1.48	114.8	-13.8	18.9	Human fetal astrocytes	Synaptosomes pHrodo red
Row 679	LP01-302-1_25	SP190705_02	8396	13	7	Data	450	2.78	0.59	2019-07-09	STF-001063	STF-001063-1	8926723	652232704	347	57	1.37	106.3	-1.8	16.4	Human fetal astrocytes	Synaptosomes pHrodo red
Row 680	LP01-302-1_25	SP190705_02	8396	13	8	Data	450	2.78	1.66	2019-07-09	STF-001143	STF-001143-1	11015294	826852800	369	59	1.33	103.5	-8.4	16	Human fetal astrocytes	Synaptosomes pHrodo red
Row 681	LP01-302-1_25	SP190705_02	8396	13	9	Data	450	2.78	0.51	2019-07-09	STF-001064	STF-001064-1	8388761	643080128	338	52	1.3	101.3	0.9	15.4	Human fetal astrocytes	Synaptosomes pHrodo red
Row 682	LP01-302-1_25	SP190705_02	8396	13	10	Data	450	2.78	0.81	2019-07-09	STF-001144	STF-001144-1	8544392	715232576	331	46	1.19	92.8	3	13.9	Human fetal astrocytes	Synaptosomes pHrodo red
Row 683	LP01-302-1_25	SP190705_02	8396	13	11	Data	450	2.78	0.75	2019-07-09	STF-001065	STF-001065-1	9547879	681908032	331	50	1.4	108.7	3	15.1	Human fetal astrocytes	Synaptosomes pHrodo red
Row 684	LP01-302-1_25	SP190705_02	8396	13	12	Data	450	2.78	1.09	2019-07-09	STF-001145	STF-001145-1	9569465	781540288	381	61	1.22	95.1	-12	16	Human fetal astrocytes	Synaptosomes pHrodo red
Row 685	LP01-302-1_25	SP190705_02	8396	13	13	Data	450	2.78	0.45	2019-07-09	STF-001066	STF-001066-1	11491860	873590208	390	59	1.32	102.2	-14.7	15.1	Human fetal astrocytes	Synaptosomes pHrodo red
Row 686	LP01-302-1_25	SP190705_02	8396	13	14	Data	450	2.78	0.74	2019-07-09	STF-001146	STF-001146-1	12689786	878550784	382	65	1.44	112.2	-12.3	17	Human fetal astrocytes	Synaptosomes pHrodo red
Row 687	LP01-302-1_25	SP190705_02	8396	13	15	Data	450	2.78	0.47	2019-07-09	STF-001067	STF-001067-1	6431297	679285696	332	46	0.95	73.5	2.7	13.9	Human fetal astrocytes	Synaptosomes pHrodo red
Row 688	LP01-302-1_25	SP190705_02	8396	13	16	Data	450	2.78	0.85	2019-07-09	STF-001147	STF-001147-1	7980262	808969600	358	37	0.99	76.6	-5.1	10.3	Human fetal astrocytes	Synaptosomes pHrodo red
Row 689	LP01-302-1_25	SP190705_02	8396	13	17	Data	450	2.78	0.84	2019-07-09	STF-001068	STF-001068-1	10863507	863082496	396	57	1.26	97.7	-16.5	14.4	Human fetal astrocytes	Synaptosomes pHrodo red
Row 690	LP01-302-1_25	SP190705_02	8396	13	18	Data	450	2.78	1.11	2019-07-09	STF-001148	STF-001148-1	8596907	796133312	392	47	1.08	83.9	-15.3	12	Human fetal astrocytes	Synaptosomes pHrodo red
Row 691	LP01-302-1_25	SP190705_02	8396	13	19	Data	450	2.78	1.05	2019-07-09	STF-001069	STF-001069-1	9993706	1045759232	453	50	0.96	74.2	-33.7	11	Human fetal astrocytes	Synaptosomes pHrodo red
Row 692	LP01-302-1_25	SP190705_02	8396	13	20	Data	450	2.78	2.18	2019-07-09	STF-001149	STF-001149-1	9992626	810614144	402	50	1.23	95.7	-18.3	12.4	Human fetal astrocytes	Synaptosomes pHrodo red
Row 693	LP01-302-1_25	SP190705_02	8396	13	21	Data	450	2.78	0.58	2019-07-09	STF-001070	STF-001070-1	11688360	996363200	411	60	1.17	91.1	-21.1	14.6	Human fetal astrocytes	Synaptosomes pHrodo red
Row 694	LP01-302-1_25	SP190705_02	8396	13	22	Data	450	2.78	0.88	2019-07-09	STF-001150	STF-001150-1	7705746	746532096	334	41	1.03	80.2	2.1	12.3	Human fetal astrocytes	Synaptosomes pHrodo red
Row 695	LP01-302-1_25	SP190705_02	8396	13	23	Positive Control				2019-07-09			182109	396852224	209	2	0.05	3.6	39.7	1	Human fetal astrocytes	None
Row 696	LP01-302-1_25	SP190705_02	8396	13	24	Low Control				2019-07-09			386629	104580312	10	5	0.37	28.7	99.5	50	Human fetal astrocytes	Synaptosomes pHrodo red
Row 697	LP01-302-1_25	SP190705_02	8396	14	1	High Control				2019-07-09			11499331	854147072	393	65	1.35	104.6	-15.6	16.5	Human fetal astrocytes	Synaptosomes pHrodo red
Row 698	LP01-302-1_25	SP190705_02	8396	14	2	High Control				2019-07-09			10285770	675764416	349	61	1.52	118.2	-2.4	17.5	Human fetal astrocytes	Synaptosomes pHrodo red
Row 699	LP01-302-1_25	SP190705_02	8396	14	3	Data	450	2.78	0.62	2019-07-09	STF-001220	STF-001220-1	12812331	731144320	344	75	1.75	136.1	-0.9	21.8	Human fetal astrocytes	Synaptosomes pHrodo red
Row 700	LP01-302-1_25	SP190705_02	8396	14	4	Data	450	2.78	1.16	2019-07-09	STF-001298	STF-001298-1	10364462	712607040	317	58	1.45	113	7.2	18.3	Human fetal astrocytes	Synaptosomes pHrodo red
Row 701	LP01-302-1_25	SP190705_02	8396	14	5	Data	450	2.78	1.12	2019-07-09	STF-001221	STF-001221-1	8417487	718939072	352	48	1.17	90.9	-3.3	13.6	Human fetal astrocytes	Synaptosomes pHrodo red
Row 702	LP01-302-1_25	SP190705_02	8396	14	6	Data	450	2.78	0.6	2019-07-09	STF-001299	STF-001299-1	10208708	702138688	353	61	1.45	112.9	-3.6	17.3	Human fetal astrocytes	Synaptosomes pHrodo red
Row 703	LP01-302-1_25	SP190705_02	8396	14	7	Data	450	2.78	1.17	2019-07-09	STF-001222	STF-001222-1	10469263	758776704	358	55	1.38	107.2	-5.1	15.4	Human fetal astrocytes	Synaptosomes pHrodo red
Row 704	LP01-302-1_25	SP190705_02	8396	14	8	Data	450	2.78	0.87	2019-07-09	STF-001300	STF-001300-1	10453776	775850880	382	61	1.35	104.6	-12.3	16	Human fetal astrocytes	Synaptosomes pHrodo red
Row 705	LP01-302-1_25	SP190705_02	8396	14	9	Data	450	2.78	1.15	2019-07-09	STF-001223	STF-001223-1	11105447	817392384	379	55	1.36	105.5	-11.4	14.5	Human fetal astrocytes	Synaptosomes pHrodo red
Row 706	LP01-302-1_25	SP190705_02	8396	14	10	Data	450	2.78	0.55	2019-07-09	STF-001301	STF-001301-1	11590888	767178880	377	68	1.51	117.3	-10.8	18	Human fetal astrocytes	Synaptosomes pHrodo red
Row 707	LP01-302-1_25	SP190705_02	8396	14	11	Data	450	2.78	1.11	2019-07-09	STF-001224	STF-001224-1	11892219	811724736	368	68	1.47	113.8	-8.1	18.5	Human fetal astrocytes	Synaptosomes pHrodo red
Row 708	LP01-302-1_25	SP190705_02	8396	14	12	Data	450	2.78	0.71	2019-07-09	STF-001302	STF-001302-1	11114799	759003904	359	66	1.46	113.7	-5.4	18.4	Human fetal astrocytes	Synaptosomes pHrodo red
Row 709	LP01-302-1_25	SP190705_02	8396	14	13	Data	450	2.78	0.93	2019-07-09	STF-001225	STF-001225-1	9578539	784323584	387	57	1.22	94.8	-13.8	14.7	Human fetal astrocytes	Synaptosomes pHrodo red
Row 710	LP01-302-1_25	SP190705_02	8396	14	14	Data	450	2.78	0.67	2019-07-09	STF-001303	STF-001303-1	10038248	920799872	428	61	1.09	84.7	-26.2	14.3	Human fetal astrocytes	Synaptosomes pHrodo red
Row 711	LP01-302-1_25	SP190705_02	8396	14	15	Data	450	2.78	0.85	2019-07-09	STF-001226	STF-001226-1	10501596	823561856	396	58	1.28	99	-16.5	14.6	Human fetal astrocytes	Synaptosomes pHrodo red
Row 712	LP01-302-1_25	SP190705_02	8396	14	16	Data	450	2.78	0.98	2019-07-09	STF-001304	STF-001304-1	10806233	905481984	415	52	1.19	92.7	-22.3	12.5	Human fetal astrocytes	Synaptosomes pHrodo red
Row 713	LP01-302-1_25	SP190705_02	8396	14	17	Data	450	2.78	0.54	2019-07-09	STF-001227	STF-001227-1	8027830	819445056	420	49	0.98	76.1	-23.8	11.7	Human fetal astrocytes	Synaptosomes pHrodo red
Row 714	LP01-302-1_25	SP190705_02	8396	14	18	Data	450	2.78	0.93	2019-07-09	STF-001305	STF-001305-1	9812018	825665536	373	50	1.19	92.3	-9.6	13.4	Human fetal astrocytes	Synaptosomes pHrodo red
Row 715	LP01-302-1_25	SP190705_02	8396	14	19	Data	450	2.78	0.77	2019-07-09	STF-001228	STF-001228-1	9775561	812255104	365	46	1.2	93.5	-7.2	12.6	Human fetal astrocytes	Synaptosomes pHrodo red
Row 716	LP01-302-1_25	SP190705_02	8396	14	20	Data	450	2.78	0.73	2019-07-09	STF-001306	STF-001306-1	10722329	944953408	395	56	1.13	88.1	-16.2	14.2	Human fetal astrocytes	Synaptosomes pHrodo red
Row 717	LP01-302-1_25	SP190705_02	8396	14	21	Data	450	2.78	1.03	2019-07-09	STF-001229	STF-001229-1	12076668	908099328	371	58	1.33	103.3	-9	15.6	Human fetal astrocytes	Synaptosomes pHrodo red
Row 718	LP01-302-1_25	SP190705_02	8396	14	22	Data	450	2.78	1.11	2019-07-09	STF-001307	STF-001307-1	12236918	752260992	334	63	1.63	126.3	2.1	18.9	Human fetal astrocytes	Synaptosomes pHrodo red
Row 719	LP01-302-1_25	SP190705_02	8396	14	23	Positive Control				2019-07-09			0	404744320	206	0	0	0	40.6	0	Human fetal astrocytes	None
Row 720	LP01-302-1_25	SP190705_02	8396	14	24	Low Control				2019-07-09			106474	89497600	10	2	0.12	9.2	99.5	20	Human fetal astrocytes	Synaptosomes pHrodo red
Row 721	LP01-302-1_25	SP190705_02	8396	15	1	High Control				2019-07-09			9171470	581530240	302	61	1.58	122.5	11.7	20.2	Human fetal astrocytes	Synaptosomes pHrodo red
Row 722	LP01-302-1_25	SP190705_02	8396	15	2	High Control				2019-07-09			10239230	679320512	321	58	1.51	117.1	6	18.1	Human fetal astrocytes	Synaptosomes pHrodo red
Row 723	LP01-302-1_25	SP190705_02	8396	15	3	Data	450	2.78	0.5	2019-07-09	STF-001071	STF-001071-1	10061753	608557376	281	60	1.65	128.4	18	21.4	Human fetal astrocytes	Synaptosomes pHrodo red
Row 724	LP01-302-1_25	SP190705_02	8396	15	4	Data	450	2.78	0.9	2019-07-09	STF-001151	STF-001151-1	8989443	692994880	325	58	1.3	100.7	4.8	17.8	Human fetal astrocytes	Synaptosomes pHrodo red
Row 725	LP01-302-1_25	SP190705_02	8396	15	5	Data	450	2.78	0.38	2019-07-09	STF-001072	STF-001072-1	10265698	674118720	318	56	1.52	118.3	6.9	17.6	Human fetal astrocytes	Synaptosomes pHrodo red
Row 726	LP01-302-1_25	SP190705_02	8396	15	6	Data	450	2.78	0.79	2019-07-09	STF-001152	STF-001152-1	11990253	793531200	392	68	1.51	117.3	-15.3	17.3	Human fetal astrocytes	Synaptosomes pHrodo red
Row 727	LP01-302-1_25	SP190705_02	8396	15	7	Data	450	2.78	1.69	2019-07-09	STF-001073	STF-001073-1	8466459	768685248	348	48	1.1	85.5	-2.1	13.8	Human fetal astrocytes	Synaptosomes pHrodo red
Row 728	LP01-302-1_25	SP190705_02	8396	15	8	Data	450	2.78	0.76	2019-07-09	STF-001153	STF-001153-1	9823217	767753792	359	58	1.28	99.4	-5.4	16.2	Human fetal astrocytes	Synaptosomes pHrodo red
Row 729	LP01-302-1_25	SP190705_02	8396	15	9	Data	450	2.78	1	2019-07-09	STF-001074	STF-001074-1	9139477	680843264	334	51	1.34	104.2	2.1	15.3	Human fetal astrocytes	Synaptosomes pHrodo red
Row 730	LP01-302-1_25	SP190705_02	8396	15	10	Data	450	2.78	1.19	2019-07-09	STF-001154	STF-001154-1	8805567	669182784	326	53	1.32	102.2	4.5	16.3	Human fetal astrocytes	Synaptosomes pHrodo red
Row 731	LP01-302-1_25	SP190705_02	8396	15	11	Data	450	2.78	1.05	2019-07-09	STF-001075	STF-001075-1	10200331	709988608	345	56	1.44	111.6	-1.2	16.2	Human fetal astrocytes	Synaptosomes pHrodo red
Row 732	LP01-302-1_25	SP190705_02	8396	15	12	Data	450	2.78	1.78	2019-07-09	STF-001155	STF-001155-1	7113508	703608512	345	41	1.01	78.5	-1.2	11.9	Human fetal astrocytes	Synaptosomes pHrodo red
Row 733	LP01-302-1_25	SP190705_02	8396	15	13	Data	450	2.78	0.84	2019-07-09	STF-001076	STF-001076-1	9552618	750968960	336	50	1.27	98.8	1.5	14.9	Human fetal astrocytes	Synaptosomes pHrodo red
Row 734	LP01-302-1_25	SP190705_02	8396	15	14	Data	450	2.78	0.74	2019-07-09	STF-001156	STF-001156-1	11763295	795703168	363	63	1.48	114.8	-6.6	17.4	Human fetal astrocytes	Synaptosomes pHrodo red
Row 735	LP01-302-1_25	SP190705_02	8396	15	15	Data	450	2.78	0.48	2019-07-09	STF-001077	STF-001077-1	6594910	773656512	375	37	0.85	66.2	-10.2	9.9	Human fetal astrocytes	Synaptosomes pHrodo red
Row 736	LP01-302-1_25	SP190705_02	8396	15	16	Data	450	2.78	0.63	2019-07-09	STF-001157	STF-001157-1	10123582	818333568	372	54	1.24	96.1	-9.3	14.5	Human fetal astrocytes	Synaptosomes pHrodo red
Row 737	LP01-302-1_25	SP190705_02	8396	15	17	Data	450	2.78	0.78	2019-07-09	STF-001078	STF-001078-1	11090349	812414208	367	61	1.37	106	-7.8	16.6	Human fetal astrocytes	Synaptosomes pHrodo red
Row 738	LP01-302-1_25	SP190705_02	8396	15	18	Data	450	2.78	0.59	2019-07-09	STF-001158	STF-001158-1	9559258	796120128	366	53	1.2	93.2	-7.5	14.5	Human fetal astrocytes	Synaptosomes pHrodo red
Row 739	LP01-302-1_25	SP190705_02	8396	15	19	Data	450	2.78	0.74	2019-07-09	STF-001079	STF-001079-1	6702151	714401600	347	40	0.94	72.9	-1.8	11.5	Human fetal astrocytes	Synaptosomes pHrodo red
Row 740	LP01-302-1_25	SP190705_02	8396	15	20	Data	450	2.78	1.14	2019-07-09	STF-001159	STF-001159-1	7865980	800095744	384	42	0.98	76.3	-12.9	10.9	Human fetal astrocytes	Synaptosomes pHrodo red
Row 741	LP01-302-1_25	SP190705_02	8396	15	21	Data	450	2.78	0.39	2019-07-09	STF-001080	STF-001080-1	9040161	866018112	355	50	1.04	81.1	-4.2	14.1	Human fetal astrocytes	Synaptosomes pHrodo red
Row 742	LP01-302-1_25	SP190705_02	8396	15	22	Data	450	2.78	0.34	2019-07-09	STF-001160	STF-001160-1	8626611	766343424	345	48	1.13	87.4	-1.2	13.9	Human fetal astrocytes	Synaptosomes pHrodo red
Row 743	LP01-302-1_25	SP190705_02	8396	15	23	Positive Control				2019-07-09			0	375613856	194	0	0	0	44.2	0	Human fetal astrocytes	None
Row 744	LP01-302-1_25	SP190705_02	8396	15	24	Low Control				2019-07-09			212860	89158000	10	3	0.24	18.5	99.5	30	Human fetal astrocytes	Synaptosomes pHrodo red
Row 745	LP01-302-1_25	SP190705_02	8396	16	1	High Control				2019-07-09			9794850	722721728	370	64	1.36	105.3	-8.7	17.3	Human fetal astrocytes	Synaptosomes pHrodo red
Row 746	LP01-302-1_25	SP190705_02	8396	16	2	High Control				2019-07-09			5934099	575618944	298	43	1.03	80.1	12.9	14.4	Human fetal astrocytes	Synaptosomes pHrodo red
Row 747	LP01-302-1_25	SP190705_02	8396	16	3	Data	450	2.78	0.62	2019-07-09	STF-001230	STF-001230-1	11051525	668900608	321	70	1.65	128.3	6	21.8	Human fetal astrocytes	Synaptosomes pHrodo red
Row 748	LP01-302-1_25	SP190705_02	8396	16	4	Data	450	2.78	0.69	2019-07-09	STF-001308	STF-001308-1	11166524	753143680	370	70	1.48	115.1	-8.7	18.9	Human fetal astrocytes	Synaptosomes pHrodo red
Row 749	LP01-302-1_25	SP190705_02	8396	16	5	Data	450	2.78	1.21	2019-07-09	STF-001231	STF-001231-1	12246911	799476928	366	74	1.53	119	-7.5	20.2	Human fetal astrocytes	Synaptosomes pHrodo red
Row 750	LP01-302-1_25	SP190705_02	8396	16	6	Data	450	2.78	0.94	2019-07-09	STF-001309	STF-001309-1	10890757	726815936	343	56	1.5	116.4	-0.6	16.3	Human fetal astrocytes	Synaptosomes pHrodo red
Row 751	LP01-302-1_25	SP190705_02	8396	16	7	Data	450	2.78	0.82	2019-07-09	STF-001232	STF-001232-1	8944087	689616320	363	56	1.3	100.7	-6.6	15.4	Human fetal astrocytes	Synaptosomes pHrodo red
Row 752	LP01-302-1_25	SP190705_02	8396	16	8	Data	450	2.78	1.46	2019-07-09	STF-001310	STF-001310-1	8296278	646952256	306	44	1.28	99.6	10.5	14.4	Human fetal astrocytes	Synaptosomes pHrodo red
Row 753	LP01-302-1_25	SP190705_02	8396	16	9	Data	450	2.78	0.68	2019-07-09	STF-001233	STF-001233-1	9337277	783947328	363	54	1.19	92.5	-6.6	14.9	Human fetal astrocytes	Synaptosomes pHrodo red
Row 754	LP01-302-1_25	SP190705_02	8396	16	10	Data	450	2.78	1.02	2019-07-09	STF-001311	STF-001311-1	12054872	838637568	382	70	1.44	111.6	-12.3	18.3	Human fetal astrocytes	Synaptosomes pHrodo red
Row 755	LP01-302-1_25	SP190705_02	8396	16	11	Data	450	2.78	0.95	2019-07-09	STF-001234	STF-001234-1	8774538	736612480	363	45	1.19	92.5	-6.6	12.4	Human fetal astrocytes	Synaptosomes pHrodo red
Row 756	LP01-302-1_25	SP190705_02	8396	16	12	Data	450	2.78	0.96	2019-07-09	STF-001312	STF-001312-1	5690113	724932480	378	36	0.78	61	-11.1	9.5	Human fetal astrocytes	Synaptosomes pHrodo red
Row 757	LP01-302-1_25	SP190705_02	8396	16	13	Data	450	2.78	1.11	2019-07-09	STF-001235	STF-001235-1	10844589	779491072	371	61	1.39	108	-9	16.4	Human fetal astrocytes	Synaptosomes pHrodo red
Row 758	LP01-302-1_25	SP190705_02	8396	16	14	Data	450	2.78	0.78	2019-07-09	STF-001313	STF-001313-1	8142585	738953216	373	55	1.1	85.6	-9.6	14.7	Human fetal astrocytes	Synaptosomes pHrodo red
Row 759	LP01-302-1_25	SP190705_02	8396	16	15	Data	450	2.78	1.38	2019-07-09	STF-001236	STF-001236-1	7322681	821477632	406	39	0.89	69.2	-19.5	9.6	Human fetal astrocytes	Synaptosomes pHrodo red
Row 760	LP01-302-1_25	SP190705_02	8396	16	16	Data	450	2.78	1.45	2019-07-09	STF-001314	STF-001314-1	7442839	654598208	351	44	1.14	88.3	-3	12.5	Human fetal astrocytes	Synaptosomes pHrodo red
Row 761	LP01-302-1_25	SP190705_02	8396	16	17	Data	450	2.78	0.73	2019-07-09	STF-001237	STF-001237-1	10144451	900337920	420	51	1.13	87.5	-23.8	12.1	Human fetal astrocytes	Synaptosomes pHrodo red
Row 762	LP01-302-1_25	SP190705_02	8396	16	18	Data	450	2.78	0.6	2019-07-09	STF-001315	STF-001315-1	8335552	746708992	369	46	1.12	86.7	-8.4	12.5	Human fetal astrocytes	Synaptosomes pHrodo red
Row 763	LP01-302-1_25	SP190705_02	8396	16	19	Data	450	2.78	0.96	2019-07-09	STF-001238	STF-001238-1	8130070	724861568	342	46	1.12	87.1	-0.3	13.5	Human fetal astrocytes	Synaptosomes pHrodo red
Row 764	LP01-302-1_25	SP190705_02	8396	16	20	Data	450	2.78	0.72	2019-07-09	STF-001316	STF-001316-1	10038649	819301568	356	58	1.23	95.2	-4.5	16.3	Human fetal astrocytes	Synaptosomes pHrodo red
Row 765	LP01-302-1_25	SP190705_02	8396	16	21	Data	450	2.78	1	2019-07-09	STF-001239	STF-001239-1	6801959	750389824	355	37	0.91	70.4	-4.2	10.4	Human fetal astrocytes	Synaptosomes pHrodo red
Row 766	LP01-302-1_25	SP190705_02	8396	16	22	Data	450	2.78	0.76	2019-07-09	STF-001317	STF-001317-1	7500626	663610304	319	46	1.13	87.8	6.6	14.4	Human fetal astrocytes	Synaptosomes pHrodo red
Row 767	LP01-302-1_25	SP190705_02	8396	16	23	Positive Control				2019-07-09			0	316509184	159	0	0	0	54.7	0	Human fetal astrocytes	None
Row 768	LP01-302-1_25	SP190705_02	8396	16	24	Low Control				2019-07-09			390583	126407096	10	6	0.31	24	99.5	60	Human fetal astrocytes	Synaptosomes pHrodo red
Row 769	LP01-302-2_5	SP190705_03	8392	1	1	High Control				2019-07-09			4460954	23053920	92	44	19.35	124.4	24.4	47.8	Human fetal astrocytes	Synaptosomes pHrodo red
Row 770	LP01-302-2_5	SP190705_03	8392	1	2	High Control				2019-07-09			4563106	21117724	87	46	21.61	138.9	29	52.9	Human fetal astrocytes	Synaptosomes pHrodo red
Row 771	LP01-302-2_5	SP190705_03	8392	1	3	Data	450	5.56	1.08	2019-07-09	STF-001001	STF-001001-1	5116925	23583672	93	51	21.7	139.4	23.5	54.8	Human fetal astrocytes	Synaptosomes pHrodo red
Row 772	LP01-302-2_5	SP190705_03	8392	1	4	Data	450	5.56	0.91	2019-07-09	STF-001081	STF-001081-1	5694996	28277156	117	58	20.14	129.4	1.4	49.6	Human fetal astrocytes	Synaptosomes pHrodo red
Row 773	LP01-302-2_5	SP190705_03	8392	1	5	Data	450	5.56	1.12	2019-07-09	STF-001002	STF-001002-1	5481540	29279054	128	60	18.72	120.3	-8.8	46.9	Human fetal astrocytes	Synaptosomes pHrodo red
Row 774	LP01-302-2_5	SP190705_03	8392	1	6	Data	450	5.56	0.73	2019-07-09	STF-001082	STF-001082-1	7162558	34712500	125	58	20.63	132.6	-6	46.4	Human fetal astrocytes	Synaptosomes pHrodo red
Row 775	LP01-302-2_5	SP190705_03	8392	1	7	Data	450	5.56	0.33	2019-07-09	STF-001003	STF-001003-1	5320134	29562378	130	56	18	115.7	-10.6	43.1	Human fetal astrocytes	Synaptosomes pHrodo red
Row 776	LP01-302-2_5	SP190705_03	8392	1	8	Data	450	5.56	1.17	2019-07-09	STF-001083	STF-001083-1	5207269	29244606	121	57	17.81	114.4	-2.3	47.1	Human fetal astrocytes	Synaptosomes pHrodo red
Row 777	LP01-302-2_5	SP190705_03	8392	1	9	Data	450	5.56	1.04	2019-07-09	STF-001004	STF-001004-1	4437111	28194692	131	45	15.74	101.1	-11.5	34.4	Human fetal astrocytes	Synaptosomes pHrodo red
Row 778	LP01-302-2_5	SP190705_03	8392	1	10	Data	450	5.56	1.83	2019-07-09	STF-001084	STF-001084-1	4581483	30654608	127	45	14.95	96.1	-7.8	35.4	Human fetal astrocytes	Synaptosomes pHrodo red
Row 779	LP01-302-2_5	SP190705_03	8392	1	11	Data	450	5.56	0.57	2019-07-09	STF-001005	STF-001005-1	5303076	28925000	130	53	18.33	117.8	-10.6	40.8	Human fetal astrocytes	Synaptosomes pHrodo red
Row 780	LP01-302-2_5	SP190705_03	8392	1	12	Data	450	5.56	0.93	2019-07-09	STF-001085	STF-001085-1	4653497	30975152	142	45	15.02	96.6	-21.7	31.7	Human fetal astrocytes	Synaptosomes pHrodo red
Row 781	LP01-302-2_5	SP190705_03	8392	1	13	Data	450	5.56	0.98	2019-07-09	STF-001006	STF-001006-1	4845700	33968664	143	48	14.27	91.7	-22.6	33.6	Human fetal astrocytes	Synaptosomes pHrodo red
Row 782	LP01-302-2_5	SP190705_03	8392	1	14	Data	450	5.56	1.63	2019-07-09	STF-001086	STF-001086-1	4283887	34745916	156	44	12.33	79.2	-34.6	28.2	Human fetal astrocytes	Synaptosomes pHrodo red
Row 783	LP01-302-2_5	SP190705_03	8392	1	15	Data	450	5.56	1.21	2019-07-09	STF-001007	STF-001007-1	3115622	23856786	113	32	13.06	83.9	5.1	28.3	Human fetal astrocytes	Synaptosomes pHrodo red
Row 784	LP01-302-2_5	SP190705_03	8392	1	16	Data	450	5.56	2.09	2019-07-09	STF-001087	STF-001087-1	3849077	30823760	136	43	12.49	80.3	-16.1	31.6	Human fetal astrocytes	Synaptosomes pHrodo red
Row 785	LP01-302-2_5	SP190705_03	8392	1	17	Data	450	5.56	1.25	2019-07-09	STF-001008	STF-001008-1	3431544	27958028	137	34	12.27	78.9	-17.1	24.8	Human fetal astrocytes	Synaptosomes pHrodo red
Row 786	LP01-302-2_5	SP190705_03	8392	1	18	Data	450	5.56	1.8	2019-07-09	STF-001088	STF-001088-1	4309470	30990508	145	44	13.91	89.4	-24.4	30.3	Human fetal astrocytes	Synaptosomes pHrodo red
Row 787	LP01-302-2_5	SP190705_03	8392	1	19	Data	450	5.56	1.74	2019-07-09	STF-001009	STF-001009-1	4757600	30977088	129	48	15.36	98.7	-9.7	37.2	Human fetal astrocytes	Synaptosomes pHrodo red
Row 788	LP01-302-2_5	SP190705_03	8392	1	20	Data	450	5.56	0.81	2019-07-09	STF-001089	STF-001089-1	3698360	24619872	106	35	15.02	96.5	11.5	33	Human fetal astrocytes	Synaptosomes pHrodo red
Row 789	LP01-302-2_5	SP190705_03	8392	1	21	Data	450	5.56	2.14	2019-07-09	STF-001010	STF-001010-1	4675854	28007820	111	43	16.69	107.3	6.9	38.7	Human fetal astrocytes	Synaptosomes pHrodo red
Row 790	LP01-302-2_5	SP190705_03	8392	1	22	Data	450	5.56	0.56	2019-07-09	STF-001090	STF-001090-1	6022214	27657232	99	55	21.77	139.9	18	55.6	Human fetal astrocytes	Synaptosomes pHrodo red
Row 791	LP01-302-2_5	SP190705_03	8392	1	23	Positive Control				2019-07-09			0	16500757	77	0	0	0	38.2	0	Human fetal astrocytes	None
Row 792	LP01-302-2_5	SP190705_03	8392	1	24	Low Control				2019-07-09			229377	133628432	10	2	0.17	1.1	100	20	Human fetal astrocytes	Synaptosomes pHrodo red
Row 793	LP01-302-2_5	SP190705_03	8392	2	1	High Control				2019-07-09			4234657	24620792	107	44	17.2	110.5	10.6	41.1	Human fetal astrocytes	Synaptosomes pHrodo red
Row 794	LP01-302-2_5	SP190705_03	8392	2	2	High Control				2019-07-09			3470792	27542496	131	39	12.6	81	-11.5	29.8	Human fetal astrocytes	Synaptosomes pHrodo red
Row 795	LP01-302-2_5	SP190705_03	8392	2	3	Data	450	5.56	1.34	2019-07-09	STF-001161	STF-001161-1	5214991	32950198	138	53	15.83	101.7	-18	38.4	Human fetal astrocytes	Synaptosomes pHrodo red
Row 796	LP01-302-2_5	SP190705_03	8392	2	4	Data	450	5.56	2.13	2019-07-09	STF-001240	STF-001240-1	4213227	34696992	158	46	12.14	78	-36.4	29.1	Human fetal astrocytes	Synaptosomes pHrodo red
Row 797	LP01-302-2_5	SP190705_03	8392	2	5	Data	450	5.56	2.02	2019-07-09	STF-001162	STF-001162-1	5519949	28306160	124	51	19.5	125.3	-5.1	41.1	Human fetal astrocytes	Synaptosomes pHrodo red
Row 798	LP01-302-2_5	SP190705_03	8392	2	6	Data	450	5.56	6.68	2019-07-09	STF-001241	STF-001241-1	4571162	30393422	145	47	15.04	96.7	-24.4	32.4	Human fetal astrocytes	Synaptosomes pHrodo red
Row 799	LP01-302-2_5	SP190705_03	8392	2	7	Data	450	5.56	1.19	2019-07-09	STF-001163	STF-001163-1	4350773	25592892	110	44	17	109.3	7.8	40	Human fetal astrocytes	Synaptosomes pHrodo red
Row 800	LP01-302-2_5	SP190705_03	8392	2	8	Data	450	5.56	1.01	2019-07-09	STF-001242	STF-001242-1	4314143	27504414	120	44	15.69	100.8	-1.4	36.7	Human fetal astrocytes	Synaptosomes pHrodo red
Row 801	LP01-302-2_5	SP190705_03	8392	2	9	Data	450	5.56	1.56	2019-07-09	STF-001164	STF-001164-1	3435013	32555286	129	33	10.55	67.8	-9.7	25.6	Human fetal astrocytes	Synaptosomes pHrodo red
Row 802	LP01-302-2_5	SP190705_03	8392	2	10	Data	450	5.56	1.93	2019-07-09	STF-001243	STF-001243-1	7288813	33988388	143	69	21.45	137.8	-22.6	48.3	Human fetal astrocytes	Synaptosomes pHrodo red
Row 803	LP01-302-2_5	SP190705_03	8392	2	11	Data	450	5.56	2.32	2019-07-09	STF-001165	STF-001165-1	3732979	31130708	149	40	11.99	77.1	-28.1	26.8	Human fetal astrocytes	Synaptosomes pHrodo red
Row 804	LP01-302-2_5	SP190705_03	8392	2	12	Data	450	5.56	1.5	2019-07-09	STF-001244	STF-001244-1	5113592	27590376	124	52	18.53	119.1	-5.1	41.9	Human fetal astrocytes	Synaptosomes pHrodo red
Row 805	LP01-302-2_5	SP190705_03	8392	2	13	Data	450	5.56	1.53	2019-07-09	STF-001166	STF-001166-1	6791673	36243244	144	62	18.74	120.4	-23.5	43.1	Human fetal astrocytes	Synaptosomes pHrodo red
Row 806	LP01-302-2_5	SP190705_03	8392	2	14	Data	450	5.56	1.8	2019-07-09	STF-001245	STF-001245-1	4423903	29456536	130	40	15.02	96.5	-10.6	30.8	Human fetal astrocytes	Synaptosomes pHrodo red
Row 807	LP01-302-2_5	SP190705_03	8392	2	15	Data	450	5.56	1.3	2019-07-09	STF-001167	STF-001167-1	3661655	26321052	123	35	13.91	89.4	-4.1	28.5	Human fetal astrocytes	Synaptosomes pHrodo red
Row 808	LP01-302-2_5	SP190705_03	8392	2	16	Data	450	5.56	2.44	2019-07-09	STF-001246	STF-001246-1	4357116	28494148	133	45	15.29	98.3	-13.4	33.8	Human fetal astrocytes	Synaptosomes pHrodo red
Row 809	LP01-302-2_5	SP190705_03	8392	2	17	Data	450	5.56	1.61	2019-07-09	STF-001168	STF-001168-1	4333016	30939136	143	41	14	90	-22.6	28.7	Human fetal astrocytes	Synaptosomes pHrodo red
Row 810	LP01-302-2_5	SP190705_03	8392	2	18	Data	450	5.56	1.09	2019-07-09	STF-001247	STF-001247-1	4733869	29504660	130	51	16.04	103.1	-10.6	39.2	Human fetal astrocytes	Synaptosomes pHrodo red
Row 811	LP01-302-2_5	SP190705_03	8392	2	19	Data	450	5.56	1.62	2019-07-09	STF-001169	STF-001169-1	4696620	26524878	123	45	17.71	113.8	-4.1	36.6	Human fetal astrocytes	Synaptosomes pHrodo red
Row 812	LP01-302-2_5	SP190705_03	8392	2	20	Data	450	5.56	1.97	2019-07-09	STF-001248	STF-001248-1	3457266	29142588	133	32	11.86	76.2	-13.4	24.1	Human fetal astrocytes	Synaptosomes pHrodo red
Row 813	LP01-302-2_5	SP190705_03	8392	2	21	Data	450	5.56	1.96	2019-07-09	STF-001170	STF-001170-1	3314879	28309208	117	30	11.71	75.3	1.4	25.6	Human fetal astrocytes	Synaptosomes pHrodo red
Row 814	LP01-302-2_5	SP190705_03	8392	2	22	Data	450	5.56	1.63	2019-07-09	STF-001249	STF-001249-1	4724382	31136688	120	39	15.17	97.5	-1.4	32.5	Human fetal astrocytes	Synaptosomes pHrodo red
Row 815	LP01-302-2_5	SP190705_03	8392	2	23	Positive Control				2019-07-09			0	15166990	57	0	0	0	56.7	0	Human fetal astrocytes	None
Row 816	LP01-302-2_5	SP190705_03	8392	2	24	Low Control				2019-07-09			718449	112734520	10	8	0.64	4.1	100	80	Human fetal astrocytes	Synaptosomes pHrodo red
Row 817	LP01-302-2_5	SP190705_03	8392	3	1	High Control				2019-07-09			4028141	24738736	116	47	16.28	104.7	2.3	40.5	Human fetal astrocytes	Synaptosomes pHrodo red
Row 818	LP01-302-2_5	SP190705_03	8392	3	2	High Control				2019-07-09			5169267	29315864	137	59	17.63	113.3	-17.1	43.1	Human fetal astrocytes	Synaptosomes pHrodo red
Row 819	LP01-302-2_5	SP190705_03	8392	3	3	Data	450	5.56	1.18	2019-07-09	STF-001011	STF-001011-1	3981155	24899748	124	44	15.99	102.8	-5.1	35.5	Human fetal astrocytes	Synaptosomes pHrodo red
Row 820	LP01-302-2_5	SP190705_03	8392	3	4	Data	450	5.56	0.9	2019-07-09	STF-001091	STF-001091-1	4710084	25782778	119	50	18.27	117.4	-0.5	42	Human fetal astrocytes	Synaptosomes pHrodo red
Row 821	LP01-302-2_5	SP190705_03	8392	3	5	Data	450	5.56	2.41	2019-07-09	STF-001012	STF-001012-1	3601516	25290148	115	38	14.24	91.5	3.2	33	Human fetal astrocytes	Synaptosomes pHrodo red
Row 822	LP01-302-2_5	SP190705_03	8392	3	6	Data	450	5.56	1.79	2019-07-09	STF-001092	STF-001092-1	6350349	32061512	156	60	19.81	127.3	-34.6	38.5	Human fetal astrocytes	Synaptosomes pHrodo red
Row 823	LP01-302-2_5	SP190705_03	8392	3	7	Data	450	5.56	1.94	2019-07-09	STF-001013	STF-001013-1	4050655	25925416	129	44	15.62	100.4	-9.7	34.1	Human fetal astrocytes	Synaptosomes pHrodo red
Row 824	LP01-302-2_5	SP190705_03	8392	3	8	Data	450	5.56	1.08	2019-07-09	STF-001093	STF-001093-1	3474346	24657912	126	42	14.09	90.6	-6.9	33.3	Human fetal astrocytes	Synaptosomes pHrodo red
Row 825	LP01-302-2_5	SP190705_03	8392	3	9	Data	450	5.56	2.34	2019-07-09	STF-001014	STF-001014-1	5231815	30873582	140	54	16.95	108.9	-19.8	38.6	Human fetal astrocytes	Synaptosomes pHrodo red
Row 826	LP01-302-2_5	SP190705_03	8392	3	10	Data	450	5.56	1.77	2019-07-09	STF-001094	STF-001094-1	3386062	29023932	131	36	11.67	75	-11.5	27.5	Human fetal astrocytes	Synaptosomes pHrodo red
Row 827	LP01-302-2_5	SP190705_03	8392	3	11	Data	450	5.56	1.48	2019-07-09	STF-001015	STF-001015-1	5224449	29660660	134	50	17.61	113.2	-14.3	37.3	Human fetal astrocytes	Synaptosomes pHrodo red
Row 828	LP01-302-2_5	SP190705_03	8392	3	12	Data	450	5.56	2.03	2019-07-09	STF-001095	STF-001095-1	3097415	28588508	123	31	10.83	69.6	-4.1	25.2	Human fetal astrocytes	Synaptosomes pHrodo red
Row 829	LP01-302-2_5	SP190705_03	8392	3	13	Data	450	5.56	2.18	2019-07-09	STF-001016	STF-001016-1	5180867	29534884	137	54	17.54	112.7	-17.1	39.4	Human fetal astrocytes	Synaptosomes pHrodo red
Row 830	LP01-302-2_5	SP190705_03	8392	3	14	Data	450	5.56	2.12	2019-07-09	STF-001096	STF-001096-1	3985353	32537522	146	40	12.25	78.7	-25.3	27.4	Human fetal astrocytes	Synaptosomes pHrodo red
Row 831	LP01-302-2_5	SP190705_03	8392	3	15	Data	450	5.56	1.63	2019-07-09	STF-001017	STF-001017-1	3450085	25321276	121	37	13.63	87.6	-2.3	30.6	Human fetal astrocytes	Synaptosomes pHrodo red
Row 832	LP01-302-2_5	SP190705_03	8392	3	16	Data	450	5.56	0.96	2019-07-09	STF-001097	STF-001097-1	4075908	27964488	130	45	14.58	93.7	-10.6	34.6	Human fetal astrocytes	Synaptosomes pHrodo red
Row 833	LP01-302-2_5	SP190705_03	8392	3	17	Data	450	5.56	1.1	2019-07-09	STF-001018	STF-001018-1	4504261	29854508	131	46	15.09	97	-11.5	35.1	Human fetal astrocytes	Synaptosomes pHrodo red
Row 834	LP01-302-2_5	SP190705_03	8392	3	18	Data	450	5.56	0.96	2019-07-09	STF-001098	STF-001098-1	3838589	27520810	123	37	13.95	89.6	-4.1	30.1	Human fetal astrocytes	Synaptosomes pHrodo red
Row 835	LP01-302-2_5	SP190705_03	8392	3	19	Data	450	5.56	2.99	2019-07-09	STF-001019	STF-001019-1	4502028	29634210	140	47	15.19	97.6	-19.8	33.6	Human fetal astrocytes	Synaptosomes pHrodo red
Row 836	LP01-302-2_5	SP190705_03	8392	3	20	Data	450	5.56	0.81	2019-07-09	STF-001099	STF-001099-1	4335700	29454636	132	47	14.72	94.6	-12.4	35.6	Human fetal astrocytes	Synaptosomes pHrodo red
Row 837	LP01-302-2_5	SP190705_03	8392	3	21	Data	450	5.56	2.52	2019-07-09	STF-001020	STF-001020-1	3757677	28803476	130	34	13.05	83.8	-10.6	26.2	Human fetal astrocytes	Synaptosomes pHrodo red
Row 838	LP01-302-2_5	SP190705_03	8392	3	22	Data	450	5.56	2.11	2019-07-09	STF-001100	STF-001100-1	4281888	29736524	130	41	14.4	92.5	-10.6	31.5	Human fetal astrocytes	Synaptosomes pHrodo red
Row 839	LP01-302-2_5	SP190705_03	8392	3	23	Positive Control				2019-07-09			0	19275360	70	0	0	0	44.7	0	Human fetal astrocytes	None
Row 840	LP01-302-2_5	SP190705_03	8392	3	24	Low Control				2019-07-09			210919	120852784	10	2	0.17	1.1	100	20	Human fetal astrocytes	Synaptosomes pHrodo red
Row 841	LP01-302-2_5	SP190705_03	8392	4	1	High Control				2019-07-09			4083565	23981836	109	47	17.03	109.4	8.8	43.1	Human fetal astrocytes	Synaptosomes pHrodo red
Row 842	LP01-302-2_5	SP190705_03	8392	4	2	High Control				2019-07-09			4003861	25593628	117	39	15.64	100.5	1.4	33.3	Human fetal astrocytes	Synaptosomes pHrodo red
Row 843	LP01-302-2_5	SP190705_03	8392	4	3	Data	450	5.56	4.17	2019-07-09	STF-001171	STF-001171-1	5175623	25388464	112	52	20.39	131	6	46.4	Human fetal astrocytes	Synaptosomes pHrodo red
Row 844	LP01-302-2_5	SP190705_03	8392	4	4	Data	450	5.56	1.78	2019-07-09	STF-001250	STF-001250-1	3724647	26938452	129	45	13.83	88.9	-9.7	34.9	Human fetal astrocytes	Synaptosomes pHrodo red
Row 845	LP01-302-2_5	SP190705_03	8392	4	5	Data	450	5.56	0.85	2019-07-09	STF-001172	STF-001172-1	4976261	32548144	145	49	15.29	98.3	-24.4	33.8	Human fetal astrocytes	Synaptosomes pHrodo red
Row 846	LP01-302-2_5	SP190705_03	8392	4	6	Data	450	5.56	0.57	2019-07-09	STF-001251	STF-001251-1	4611876	26500800	114	41	17.4	111.8	4.1	36	Human fetal astrocytes	Synaptosomes pHrodo red
Row 847	LP01-302-2_5	SP190705_03	8392	4	7	Data	450	5.56	1.84	2019-07-09	STF-001173	STF-001173-1	3868915	28107872	130	40	13.76	88.5	-10.6	30.8	Human fetal astrocytes	Synaptosomes pHrodo red
Row 848	LP01-302-2_5	SP190705_03	8392	4	8	Data	450	5.56	0.94	2019-07-09	STF-001252	STF-001252-1	4644424	28990468	125	42	16.02	103	-6	33.6	Human fetal astrocytes	Synaptosomes pHrodo red
Row 849	LP01-302-2_5	SP190705_03	8392	4	9	Data	450	5.56	2.39	2019-07-09	STF-001174	STF-001174-1	4911672	30012756	135	46	16.37	105.2	-15.2	34.1	Human fetal astrocytes	Synaptosomes pHrodo red
Row 850	LP01-302-2_5	SP190705_03	8392	4	10	Data	450	5.56	1.64	2019-07-09	STF-001253	STF-001253-1	3727809	25425544	119	36	14.66	94.2	-0.5	30.3	Human fetal astrocytes	Synaptosomes pHrodo red
Row 851	LP01-302-2_5	SP190705_03	8392	4	11	Data	450	5.56	1.85	2019-07-09	STF-001175	STF-001175-1	6298224	33474962	146	64	18.81	120.9	-25.3	43.8	Human fetal astrocytes	Synaptosomes pHrodo red
Row 852	LP01-302-2_5	SP190705_03	8392	4	12	Data	450	5.56	1.59	2019-07-09	STF-001254	STF-001254-1	4107396	27467364	127	36	14.95	96.1	-7.8	28.3	Human fetal astrocytes	Synaptosomes pHrodo red
Row 853	LP01-302-2_5	SP190705_03	8392	4	13	Data	450	5.56	2.57	2019-07-09	STF-001176	STF-001176-1	5892116	35153132	154	59	16.76	107.7	-32.7	38.3	Human fetal astrocytes	Synaptosomes pHrodo red
Row 854	LP01-302-2_5	SP190705_03	8392	4	14	Data	450	5.56	1.78	2019-07-09	STF-001255	STF-001255-1	3682681	30011568	138	41	12.27	78.9	-18	29.7	Human fetal astrocytes	Synaptosomes pHrodo red
Row 855	LP01-302-2_5	SP190705_03	8392	4	15	Data	450	5.56	1.41	2019-07-09	STF-001177	STF-001177-1	5545019	33318828	144	54	16.64	107	-23.5	37.5	Human fetal astrocytes	Synaptosomes pHrodo red
Row 856	LP01-302-2_5	SP190705_03	8392	4	16	Data	450	5.56	2.04	2019-07-09	STF-001256	STF-001256-1	3135899	22393228	106	36	14	90	11.5	34	Human fetal astrocytes	Synaptosomes pHrodo red
Row 857	LP01-302-2_5	SP190705_03	8392	4	17	Data	450	5.56	1.48	2019-07-09	STF-001178	STF-001178-1	4408447	27331728	122	43	16.13	103.7	-3.2	35.2	Human fetal astrocytes	Synaptosomes pHrodo red
Row 858	LP01-302-2_5	SP190705_03	8392	4	18	Data	450	5.56	2.25	2019-07-09	STF-001257	STF-001257-1	3758585	28227582	128	39	13.32	85.6	-8.8	30.5	Human fetal astrocytes	Synaptosomes pHrodo red
Row 859	LP01-302-2_5	SP190705_03	8392	4	19	Data	450	5.56	1.61	2019-07-09	STF-001179	STF-001179-1	5093530	30935692	121	46	16.46	105.8	-2.3	38	Human fetal astrocytes	Synaptosomes pHrodo red
Row 860	LP01-302-2_5	SP190705_03	8392	4	20	Data	450	5.56	3.08	2019-07-09	STF-001258	STF-001258-1	4966479	26954764	119	51	18.43	118.4	-0.5	42.9	Human fetal astrocytes	Synaptosomes pHrodo red
Row 861	LP01-302-2_5	SP190705_03	8392	4	21	Data	450	5.56	1.02	2019-07-09	STF-001180	STF-001180-1	5097727	29118664	119	48	17.51	112.5	-0.5	40.3	Human fetal astrocytes	Synaptosomes pHrodo red
Row 862	LP01-302-2_5	SP190705_03	8392	4	22	Data	450	5.56	2.56	2019-07-09	STF-001259	STF-001259-1	2363011	26117550	131	26	9.05	58.1	-11.5	19.8	Human fetal astrocytes	Synaptosomes pHrodo red
Row 863	LP01-302-2_5	SP190705_03	8392	4	23	Positive Control				2019-07-09			0	16899128	74	0	0	0	41	0	Human fetal astrocytes	None
Row 864	LP01-302-2_5	SP190705_03	8392	4	24	Low Control				2019-07-09			184134	106281360	10	4	0.17	1.1	100	40	Human fetal astrocytes	Synaptosomes pHrodo red
Row 865	LP01-302-2_5	SP190705_03	8392	5	1	High Control				2019-07-09			3204702	19070148	88	42	16.8	108	28.1	47.7	Human fetal astrocytes	Synaptosomes pHrodo red
Row 866	LP01-302-2_5	SP190705_03	8392	5	2	High Control				2019-07-09			5796633	30680268	131	57	18.89	121.4	-11.5	43.5	Human fetal astrocytes	Synaptosomes pHrodo red
Row 867	LP01-302-2_5	SP190705_03	8392	5	3	Data	450	5.56	2.07	2019-07-09	STF-001021	STF-001021-1	4408897	23350730	113	47	18.88	121.4	5.1	41.6	Human fetal astrocytes	Synaptosomes pHrodo red
Row 868	LP01-302-2_5	SP190705_03	8392	5	4	Data	450	5.56	1.12	2019-07-09	STF-001101	STF-001101-1	2832880	24536152	119	30	11.55	74.2	-0.5	25.2	Human fetal astrocytes	Synaptosomes pHrodo red
Row 869	LP01-302-2_5	SP190705_03	8392	5	5	Data	450	5.56	2.4	2019-07-09	STF-001022	STF-001022-1	4835285	32899068	148	52	14.7	94.5	-27.2	35.1	Human fetal astrocytes	Synaptosomes pHrodo red
Row 870	LP01-302-2_5	SP190705_03	8392	5	6	Data	450	5.56	0.76	2019-07-09	STF-001102	STF-001102-1	4725440	31909548	135	47	14.81	95.2	-15.2	34.8	Human fetal astrocytes	Synaptosomes pHrodo red
Row 871	LP01-302-2_5	SP190705_03	8392	5	7	Data	450	5.56	0.56	2019-07-09	STF-001023	STF-001023-1	4502250	27209416	137	52	16.55	106.3	-17.1	38	Human fetal astrocytes	Synaptosomes pHrodo red
Row 872	LP01-302-2_5	SP190705_03	8392	5	8	Data	450	5.56	0.61	2019-07-09	STF-001103	STF-001103-1	2731695	25407620	122	32	10.75	69.1	-3.2	26.2	Human fetal astrocytes	Synaptosomes pHrodo red
Row 873	LP01-302-2_5	SP190705_03	8392	5	9	Data	450	5.56	2.59	2019-07-09	STF-001024	STF-001024-1	4435049	28785392	131	43	15.41	99	-11.5	32.8	Human fetal astrocytes	Synaptosomes pHrodo red
Row 874	LP01-302-2_5	SP190705_03	8392	5	10	Data	450	5.56	1.73	2019-07-09	STF-001104	STF-001104-1	5778604	33246996	124	46	17.38	111.7	-5.1	37.1	Human fetal astrocytes	Synaptosomes pHrodo red
Row 875	LP01-302-2_5	SP190705_03	8392	5	11	Data	450	5.56	1.09	2019-07-09	STF-001025	STF-001025-1	4182475	28368076	132	41	14.74	94.8	-12.4	31.1	Human fetal astrocytes	Synaptosomes pHrodo red
Row 876	LP01-302-2_5	SP190705_03	8392	5	12	Data	450	5.56	1.67	2019-07-09	STF-001105	STF-001105-1	3954533	28736262	137	43	13.76	88.4	-17.1	31.4	Human fetal astrocytes	Synaptosomes pHrodo red
Row 877	LP01-302-2_5	SP190705_03	8392	5	13	Data	450	5.56	1.81	2019-07-09	STF-001026	STF-001026-1	4624936	30955108	136	46	14.94	96	-16.1	33.8	Human fetal astrocytes	Synaptosomes pHrodo red
Row 878	LP01-302-2_5	SP190705_03	8392	5	14	Data	450	5.56	1.63	2019-07-09	STF-001106	STF-001106-1	4203783	29893616	139	41	14.06	90.4	-18.9	29.5	Human fetal astrocytes	Synaptosomes pHrodo red
Row 879	LP01-302-2_5	SP190705_03	8392	5	15	Data	450	5.56	1.54	2019-07-09	STF-001027	STF-001027-1	4748727	28017296	130	48	16.95	108.9	-10.6	36.9	Human fetal astrocytes	Synaptosomes pHrodo red
Row 880	LP01-302-2_5	SP190705_03	8392	5	16	Data	450	5.56	1.63	2019-07-09	STF-001107	STF-001107-1	4046848	28810826	135	41	14.05	90.3	-15.2	30.4	Human fetal astrocytes	Synaptosomes pHrodo red
Row 881	LP01-302-2_5	SP190705_03	8392	5	17	Data	450	5.56	2.62	2019-07-09	STF-001028	STF-001028-1	4985631	27170904	114	44	18.35	117.9	4.1	38.6	Human fetal astrocytes	Synaptosomes pHrodo red
Row 882	LP01-302-2_5	SP190705_03	8392	5	18	Data	450	5.56	0.56	2019-07-09	STF-001108	STF-001108-1	5929024	32552040	131	54	18.21	117.1	-11.5	41.2	Human fetal astrocytes	Synaptosomes pHrodo red
Row 883	LP01-302-2_5	SP190705_03	8392	5	19	Data	450	5.56	1.19	2019-07-09	STF-001029	STF-001029-1	3278983	27219064	127	35	12.05	77.4	-7.8	27.6	Human fetal astrocytes	Synaptosomes pHrodo red
Row 884	LP01-302-2_5	SP190705_03	8392	5	20	Data	450	5.56	1.05	2019-07-09	STF-001109	STF-001109-1	3935201	26740660	127	42	14.72	94.6	-7.8	33.1	Human fetal astrocytes	Synaptosomes pHrodo red
Row 885	LP01-302-2_5	SP190705_03	8392	5	21	Data	450	5.56	2.14	2019-07-09	STF-001030	STF-001030-1	4604149	27298608	120	43	16.87	108.4	-1.4	35.8	Human fetal astrocytes	Synaptosomes pHrodo red
Row 886	LP01-302-2_5	SP190705_03	8392	5	22	Data	450	5.56	1.8	2019-07-09	STF-001110	STF-001110-1	4506283	30903040	138	48	14.58	93.7	-18	34.8	Human fetal astrocytes	Synaptosomes pHrodo red
Row 887	LP01-302-2_5	SP190705_03	8392	5	23	Positive Control				2019-07-09			0	15390323	64	0	0	0	50.2	0	Human fetal astrocytes	None
Row 888	LP01-302-2_5	SP190705_03	8392	5	24	Low Control				2019-07-09			151047	141681712	10	1	0.11	0.7	100	10	Human fetal astrocytes	Synaptosomes pHrodo red
Row 889	LP01-302-2_5	SP190705_03	8392	6	1	High Control				2019-07-09			4127874	26367608	117	46	15.66	100.6	1.4	39.3	Human fetal astrocytes	Synaptosomes pHrodo red
Row 890	LP01-302-2_5	SP190705_03	8392	6	2	High Control				2019-07-09			3746743	24726520	116	42	15.15	97.4	2.3	36.2	Human fetal astrocytes	Synaptosomes pHrodo red
Row 891	LP01-302-2_5	SP190705_03	8392	6	3	Data	450	5.56	1.34	2019-07-09	STF-001181	STF-001181-1	4043672	25968684	125	43	15.57	100.1	-6	34.4	Human fetal astrocytes	Synaptosomes pHrodo red
Row 892	LP01-302-2_5	SP190705_03	8392	6	4	Data	450	5.56	2.17	2019-07-09	STF-080497	STF-080497-2	5210709	26822132	119	54	19.43	124.9	-0.5	45.4	Human fetal astrocytes	Synaptosomes pHrodo red
Row 893	LP01-302-2_5	SP190705_03	8392	6	5	Data	450	5.56	0.76	2019-07-09	STF-001182	STF-001182-1	4671898	28471282	135	52	16.41	105.5	-15.2	38.5	Human fetal astrocytes	Synaptosomes pHrodo red
Row 894	LP01-302-2_5	SP190705_03	8392	6	6	Data	450	5.56	2.74	2019-07-09	STF-001260	STF-001260-1	5137796	28162492	130	54	18.24	117.3	-10.6	41.5	Human fetal astrocytes	Synaptosomes pHrodo red
Row 895	LP01-302-2_5	SP190705_03	8392	6	7	Data	450	5.56	1.39	2019-07-09	STF-001183	STF-001183-1	5254648	32361740	142	53	16.24	104.4	-21.7	37.3	Human fetal astrocytes	Synaptosomes pHrodo red
Row 896	LP01-302-2_5	SP190705_03	8392	6	8	Data	450	5.56	0.85	2019-07-09	STF-001261	STF-001261-1	4869983	28078236	128	47	17.34	111.5	-8.8	36.7	Human fetal astrocytes	Synaptosomes pHrodo red
Row 897	LP01-302-2_5	SP190705_03	8392	6	9	Data	450	5.56	2.39	2019-07-09	STF-001184	STF-001184-1	3534270	26346640	126	41	13.41	86.2	-6.9	32.5	Human fetal astrocytes	Synaptosomes pHrodo red
Row 898	LP01-302-2_5	SP190705_03	8392	6	10	Data	450	5.56	2.17	2019-07-09	STF-001262	STF-001262-1	3747686	28608104	132	38	13.1	84.2	-12.4	28.8	Human fetal astrocytes	Synaptosomes pHrodo red
Row 899	LP01-302-2_5	SP190705_03	8392	6	11	Data	450	5.56	2.46	2019-07-09	STF-001185	STF-001185-1	4350908	27200298	132	50	16	102.8	-12.4	37.9	Human fetal astrocytes	Synaptosomes pHrodo red
Row 900	LP01-302-2_5	SP190705_03	8392	6	12	Data	450	5.56	3.33	2019-07-09	STF-001263	STF-001263-1	4977549	32114884	149	56	15.5	99.6	-28.1	37.6	Human fetal astrocytes	Synaptosomes pHrodo red
Row 901	LP01-302-2_5	SP190705_03	8392	6	13	Data	450	5.56	1.98	2019-07-09	STF-001186	STF-001186-1	3879050	28488122	133	43	13.62	87.5	-13.4	32.3	Human fetal astrocytes	Synaptosomes pHrodo red
Row 902	LP01-302-2_5	SP190705_03	8392	6	14	Data	450	5.56	2.74	2019-07-09	STF-001264	STF-001264-1	4665809	30360832	142	50	15.37	98.8	-21.7	35.2	Human fetal astrocytes	Synaptosomes pHrodo red
Row 903	LP01-302-2_5	SP190705_03	8392	6	15	Data	450	5.56	2.21	2019-07-09	STF-001187	STF-001187-1	4205359	35373120	146	41	11.89	76.4	-25.3	28.1	Human fetal astrocytes	Synaptosomes pHrodo red
Row 904	LP01-302-2_5	SP190705_03	8392	6	16	Data	450	5.56	0.57	2019-07-09	STF-001265	STF-001265-1	5419309	31586180	143	56	17.16	110.3	-22.6	39.2	Human fetal astrocytes	Synaptosomes pHrodo red
Row 905	LP01-302-2_5	SP190705_03	8392	6	17	Data	450	5.56	1.19	2019-07-09	STF-001188	STF-001188-1	4348744	29996852	126	44	14.5	93.2	-6.9	34.9	Human fetal astrocytes	Synaptosomes pHrodo red
Row 906	LP01-302-2_5	SP190705_03	8392	6	18	Data	450	5.56	1.48	2019-07-09	STF-001266	STF-001266-1	5701228	32479988	138	59	17.55	112.8	-18	42.8	Human fetal astrocytes	Synaptosomes pHrodo red
Row 907	LP01-302-2_5	SP190705_03	8392	6	19	Data	450	5.56	2.09	2019-07-09	STF-001189	STF-001189-1	5459106	29871932	132	54	18.28	117.5	-12.4	40.9	Human fetal astrocytes	Synaptosomes pHrodo red
Row 908	LP01-302-2_5	SP190705_03	8392	6	20	Data	450	5.56	1.58	2019-07-09	STF-001267	STF-001267-1	3189572	25034192	101	26	12.74	81.9	16.1	25.7	Human fetal astrocytes	Synaptosomes pHrodo red
Row 909	LP01-302-2_5	SP190705_03	8392	6	21	Data	450	5.56	3.93	2019-07-09	STF-001190	STF-001190-1	4304111	24479584	107	40	17.58	113	10.6	37.4	Human fetal astrocytes	Synaptosomes pHrodo red
Row 910	LP01-302-2_5	SP190705_03	8392	6	22	Data	450	5.56	0.89	2019-07-09	STF-001268	STF-001268-1	4120242	26502172	120	39	15.55	99.9	-1.4	32.5	Human fetal astrocytes	Synaptosomes pHrodo red
Row 911	LP01-302-2_5	SP190705_03	8392	6	23	Positive Control				2019-07-09			0	19664138	91	0	0	0	25.3	0	Human fetal astrocytes	None
Row 912	LP01-302-2_5	SP190705_03	8392	6	24	Low Control				2019-07-09			48142	98373864	10	1	0.05	0.3	100	10	Human fetal astrocytes	Synaptosomes pHrodo red
Row 913	LP01-302-2_5	SP190705_03	8392	7	1	High Control				2019-07-09			3870243	26030432	116	42	14.87	95.6	2.3	36.2	Human fetal astrocytes	Synaptosomes pHrodo red
Row 914	LP01-302-2_5	SP190705_03	8392	7	2	High Control				2019-07-09			4934183	30981272	138	55	15.93	102.4	-18	39.9	Human fetal astrocytes	Synaptosomes pHrodo red
Row 915	LP01-302-2_5	SP190705_03	8392	7	3	Data	450	5.56	0.85	2019-07-09	STF-001031	STF-001031-1	3729124	27354664	126	42	13.63	87.6	-6.9	33.3	Human fetal astrocytes	Synaptosomes pHrodo red
Row 916	LP01-302-2_5	SP190705_03	8392	7	4	Data	450	5.56	1.48	2019-07-09	STF-001111	STF-001111-1	3911554	31723152	140	40	12.33	79.2	-19.8	28.6	Human fetal astrocytes	Synaptosomes pHrodo red
Row 917	LP01-302-2_5	SP190705_03	8392	7	5	Data	450	5.56	0.52	2019-07-09	STF-001032	STF-001032-1	5307488	28885550	129	51	18.37	118.1	-9.7	39.5	Human fetal astrocytes	Synaptosomes pHrodo red
Row 918	LP01-302-2_5	SP190705_03	8392	7	6	Data	450	5.56	1.74	2019-07-09	STF-001112	STF-001112-1	5088093	33441726	143	51	15.21	97.8	-22.6	35.7	Human fetal astrocytes	Synaptosomes pHrodo red
Row 919	LP01-302-2_5	SP190705_03	8392	7	7	Data	450	5.56	1.56	2019-07-09	STF-001033	STF-001033-1	5039965	28851636	128	47	17.47	112.3	-8.8	36.7	Human fetal astrocytes	Synaptosomes pHrodo red
Row 920	LP01-302-2_5	SP190705_03	8392	7	8	Data	450	5.56	3.15	2019-07-09	STF-001113	STF-001113-1	3870313	30596416	141	45	12.65	81.3	-20.7	31.9	Human fetal astrocytes	Synaptosomes pHrodo red
Row 921	LP01-302-2_5	SP190705_03	8392	7	9	Data	450	5.56	2.45	2019-07-09	STF-001034	STF-001034-1	5797890	32466646	140	53	17.86	114.8	-19.8	37.9	Human fetal astrocytes	Synaptosomes pHrodo red
Row 922	LP01-302-2_5	SP190705_03	8392	7	10	Data	450	5.56	1.59	2019-07-09	STF-001114	STF-001114-1	6272417	31295776	142	56	20.04	128.8	-21.7	39.4	Human fetal astrocytes	Synaptosomes pHrodo red
Row 923	LP01-302-2_5	SP190705_03	8392	7	11	Data	450	5.56	1.36	2019-07-09	STF-001035	STF-001035-1	5274427	29444854	121	48	17.91	115.1	-2.3	39.7	Human fetal astrocytes	Synaptosomes pHrodo red
Row 924	LP01-302-2_5	SP190705_03	8392	7	12	Data	450	5.56	1.22	2019-07-09	STF-001115	STF-001115-1	7094821	34275840	148	59	20.7	133	-27.2	39.9	Human fetal astrocytes	Synaptosomes pHrodo red
Row 925	LP01-302-2_5	SP190705_03	8392	7	13	Data	450	5.56	1.3	2019-07-09	STF-001036	STF-001036-1	4576667	30454860	137	43	15.03	96.6	-17.1	31.4	Human fetal astrocytes	Synaptosomes pHrodo red
Row 926	LP01-302-2_5	SP190705_03	8392	7	14	Data	450	5.56	1.74	2019-07-09	STF-001116	STF-001116-1	5062014	31185204	147	52	16.23	104.3	-26.3	35.4	Human fetal astrocytes	Synaptosomes pHrodo red
Row 927	LP01-302-2_5	SP190705_03	8392	7	15	Data	450	5.56	1.25	2019-07-09	STF-001037	STF-001037-1	5622543	34791688	153	48	16.16	103.9	-31.8	31.4	Human fetal astrocytes	Synaptosomes pHrodo red
Row 928	LP01-302-2_5	SP190705_03	8392	7	16	Data	450	5.56	1	2019-07-09	STF-001117	STF-001117-1	5829739	32875720	144	50	17.73	114	-23.5	34.7	Human fetal astrocytes	Synaptosomes pHrodo red
Row 929	LP01-302-2_5	SP190705_03	8392	7	17	Data	450	5.56	1	2019-07-09	STF-001038	STF-001038-1	4182528	27887996	133	40	15	96.4	-13.4	30.1	Human fetal astrocytes	Synaptosomes pHrodo red
Row 930	LP01-302-2_5	SP190705_03	8392	7	18	Data	450	5.56	2.15	2019-07-09	STF-001118	STF-001118-1	4181330	28119116	135	38	14.87	95.6	-15.2	28.1	Human fetal astrocytes	Synaptosomes pHrodo red
Row 931	LP01-302-2_5	SP190705_03	8392	7	19	Data	450	5.56	1.23	2019-07-09	STF-001039	STF-001039-1	4010799	31097684	135	37	12.9	82.9	-15.2	27.4	Human fetal astrocytes	Synaptosomes pHrodo red
Row 932	LP01-302-2_5	SP190705_03	8392	7	20	Data	450	5.56	1.23	2019-07-09	STF-001119	STF-001119-1	5377445	31676990	134	43	16.98	109.1	-14.3	32.1	Human fetal astrocytes	Synaptosomes pHrodo red
Row 933	LP01-302-2_5	SP190705_03	8392	7	21	Data	450	5.56	2.43	2019-07-09	STF-001040	STF-001040-1	4582536	29728340	123	43	15.41	99.1	-4.1	35	Human fetal astrocytes	Synaptosomes pHrodo red
Row 934	LP01-302-2_5	SP190705_03	8392	7	22	Data	450	5.56	0.6	2019-07-09	STF-001120	STF-001120-1	3994137	28466088	135	42	14.03	90.2	-15.2	31.1	Human fetal astrocytes	Synaptosomes pHrodo red
Row 935	LP01-302-2_5	SP190705_03	8392	7	23	Positive Control				2019-07-09			0	17346354	72	0	0	0	42.9	0	Human fetal astrocytes	None
Row 936	LP01-302-2_5	SP190705_03	8392	7	24	Low Control				2019-07-09			97288	140007280	10	1	0.07	0.4	100	10	Human fetal astrocytes	Synaptosomes pHrodo red
Row 937	LP01-302-2_5	SP190705_03	8392	8	1	High Control				2019-07-09			4638713	29325288	121	46	15.82	101.7	-2.3	38	Human fetal astrocytes	Synaptosomes pHrodo red
Row 938	LP01-302-2_5	SP190705_03	8392	8	2	High Control				2019-07-09			5094660	28611060	122	48	17.81	114.4	-3.2	39.3	Human fetal astrocytes	Synaptosomes pHrodo red
Row 939	LP01-302-2_5	SP190705_03	8392	8	3	Data	450	5.56	0.77	2019-07-09	STF-001191	STF-001191-1	4509036	31325352	142	47	14.39	92.5	-21.7	33.1	Human fetal astrocytes	Synaptosomes pHrodo red
Row 940	LP01-302-2_5	SP190705_03	8392	8	4	Data	450	5.56	2.24	2019-07-09	STF-001269	STF-001269-1	5537143	28201118	120	56	19.63	126.2	-1.4	46.7	Human fetal astrocytes	Synaptosomes pHrodo red
Row 941	LP01-302-2_5	SP190705_03	8392	8	5	Data	450	5.56	1.78	2019-07-09	STF-001192	STF-001192-1	5217336	31342868	133	49	16.65	107	-13.4	36.8	Human fetal astrocytes	Synaptosomes pHrodo red
Row 942	LP01-302-2_5	SP190705_03	8392	8	6	Data	450	5.56	3.82	2019-07-09	STF-001270	STF-001270-1	4893582	35417812	158	50	13.82	88.8	-36.4	31.6	Human fetal astrocytes	Synaptosomes pHrodo red
Row 943	LP01-302-2_5	SP190705_03	8392	8	7	Data	450	5.56	1.91	2019-07-09	STF-001193	STF-001193-1	5442197	32550674	138	56	16.72	107.5	-18	40.6	Human fetal astrocytes	Synaptosomes pHrodo red
Row 944	LP01-302-2_5	SP190705_03	8392	8	8	Data	450	5.56	1.66	2019-07-09	STF-001271	STF-001271-1	5228128	29981296	135	58	17.44	112.1	-15.2	43	Human fetal astrocytes	Synaptosomes pHrodo red
Row 945	LP01-302-2_5	SP190705_03	8392	8	9	Data	450	5.56	2.24	2019-07-09	STF-001194	STF-001194-1	5306080	32511822	144	53	16.32	104.9	-23.5	36.8	Human fetal astrocytes	Synaptosomes pHrodo red
Row 946	LP01-302-2_5	SP190705_03	8392	8	10	Data	450	5.56	2.65	2019-07-09	STF-001272	STF-001272-1	4484351	31499520	144	47	14.24	91.5	-23.5	32.6	Human fetal astrocytes	Synaptosomes pHrodo red
Row 947	LP01-302-2_5	SP190705_03	8392	8	11	Data	450	5.56	2.27	2019-07-09	STF-001195	STF-001195-1	7728358	35155720	152	76	21.98	141.3	-30.9	50	Human fetal astrocytes	Synaptosomes pHrodo red
Row 948	LP01-302-2_5	SP190705_03	8392	8	12	Data	450	5.56	1.98	2019-07-09	STF-001273	STF-001273-1	6705585	33590772	150	68	19.96	128.3	-29	45.3	Human fetal astrocytes	Synaptosomes pHrodo red
Row 949	LP01-302-2_5	SP190705_03	8392	8	13	Data	450	5.56	1.69	2019-07-09	STF-001196	STF-001196-1	4589086	31582732	139	49	14.53	93.4	-18.9	35.3	Human fetal astrocytes	Synaptosomes pHrodo red
Row 950	LP01-302-2_5	SP190705_03	8392	8	14	Data	450	5.56	1.82	2019-07-09	STF-001274	STF-001274-1	5164879	30874790	137	49	16.73	107.5	-17.1	35.8	Human fetal astrocytes	Synaptosomes pHrodo red
Row 951	LP01-302-2_5	SP190705_03	8392	8	15	Data	450	5.56	2.14	2019-07-09	STF-001197	STF-001197-1	3050177	29460844	133	32	10.35	66.5	-13.4	24.1	Human fetal astrocytes	Synaptosomes pHrodo red
Row 952	LP01-302-2_5	SP190705_03	8392	8	16	Data	450	5.56	1.76	2019-07-09	STF-001275	STF-001275-1	4416787	32334940	144	42	13.66	87.8	-23.5	29.2	Human fetal astrocytes	Synaptosomes pHrodo red
Row 953	LP01-302-2_5	SP190705_03	8392	8	17	Data	450	5.56	1.96	2019-07-09	STF-001198	STF-001198-1	4046051	29068696	125	38	13.92	89.5	-6	30.4	Human fetal astrocytes	Synaptosomes pHrodo red
Row 954	LP01-302-2_5	SP190705_03	8392	8	18	Data	450	5.56	2.65	2019-07-09	STF-001276	STF-001276-1	4523327	28999360	135	45	15.6	100.3	-15.2	33.3	Human fetal astrocytes	Synaptosomes pHrodo red
Row 955	LP01-302-2_5	SP190705_03	8392	8	19	Data	450	5.56	0.57	2019-07-09	STF-001199	STF-001199-1	4775023	32467256	141	46	14.71	94.5	-20.7	32.6	Human fetal astrocytes	Synaptosomes pHrodo red
Row 956	LP01-302-2_5	SP190705_03	8392	8	20	Data	450	5.56	2.47	2019-07-09	STF-001277	STF-001277-1	4831294	29381260	116	44	16.44	105.7	2.3	37.9	Human fetal astrocytes	Synaptosomes pHrodo red
Row 957	LP01-302-2_5	SP190705_03	8392	8	21	Data	450	5.56	1.4	2019-07-09	STF-001200	STF-001200-1	4264887	28801356	128	39	14.81	95.2	-8.8	30.5	Human fetal astrocytes	Synaptosomes pHrodo red
Row 958	LP01-302-2_5	SP190705_03	8392	8	22	Data	450	5.56	0.61	2019-07-09	STF-001278	STF-001278-1	3628015	30343710	129	36	11.96	76.8	-9.7	27.9	Human fetal astrocytes	Synaptosomes pHrodo red
Row 959	LP01-302-2_5	SP190705_03	8392	8	23	Positive Control				2019-07-09			0	17884832	82	0	0	0	33.6	0	Human fetal astrocytes	None
Row 960	LP01-302-2_5	SP190705_03	8392	8	24	Low Control				2019-07-09			169303	129101240	10	2	0.13	0.8	100	20	Human fetal astrocytes	Synaptosomes pHrodo red
Row 961	LP01-302-2_5	SP190705_03	8392	9	1	High Control				2019-07-09			4248820	26633464	130	49	15.95	102.5	-10.6	37.7	Human fetal astrocytes	Synaptosomes pHrodo red
Row 962	LP01-302-2_5	SP190705_03	8392	9	2	High Control				2019-07-09			4093023	25862886	111	41	15.83	101.7	6.9	36.9	Human fetal astrocytes	Synaptosomes pHrodo red
Row 963	LP01-302-2_5	SP190705_03	8392	9	3	Data	450	5.56	0.72	2019-07-09	STF-001041	STF-001041-1	4641128	26655546	122	51	17.41	111.9	-3.2	41.8	Human fetal astrocytes	Synaptosomes pHrodo red
Row 964	LP01-302-2_5	SP190705_03	8392	9	4	Data	450	5.56	1.48	2019-07-09	STF-001121	STF-001121-1	4243567	26791014	131	47	15.84	101.8	-11.5	35.9	Human fetal astrocytes	Synaptosomes pHrodo red
Row 965	LP01-302-2_5	SP190705_03	8392	9	5	Data	450	5.56	3.76	2019-07-09	STF-001042	STF-001042-1	4721165	29493508	135	48	16.01	102.9	-15.2	35.6	Human fetal astrocytes	Synaptosomes pHrodo red
Row 966	LP01-302-2_5	SP190705_03	8392	9	6	Data	450	5.56	3.79	2019-07-09	STF-001122	STF-001122-1	4811810	28933372	136	49	16.63	106.9	-16.1	36	Human fetal astrocytes	Synaptosomes pHrodo red
Row 967	LP01-302-2_5	SP190705_03	8392	9	7	Data	450	5.56	0.76	2019-07-09	STF-001043	STF-001043-1	5446111	30516364	121	47	17.85	114.7	-2.3	38.8	Human fetal astrocytes	Synaptosomes pHrodo red
Row 968	LP01-302-2_5	SP190705_03	8392	9	8	Data	450	5.56	1.48	2019-07-09	STF-001123	STF-001123-1	5085749	32048944	146	50	15.87	102	-25.3	34.2	Human fetal astrocytes	Synaptosomes pHrodo red
Row 969	LP01-302-2_5	SP190705_03	8392	9	9	Data	450	5.56	1.21	2019-07-09	STF-001044	STF-001044-1	4717037	29836506	142	46	15.81	101.6	-21.7	32.4	Human fetal astrocytes	Synaptosomes pHrodo red
Row 970	LP01-302-2_5	SP190705_03	8392	9	10	Data	450	5.56	1.29	2019-07-09	STF-001124	STF-001124-1	4992437	27918162	130	48	17.88	114.9	-10.6	36.9	Human fetal astrocytes	Synaptosomes pHrodo red
Row 971	LP01-302-2_5	SP190705_03	8392	9	11	Data	450	5.56	1.67	2019-07-09	STF-001045	STF-001045-1	5409774	30279890	131	50	17.87	114.8	-11.5	38.2	Human fetal astrocytes	Synaptosomes pHrodo red
Row 972	LP01-302-2_5	SP190705_03	8392	9	12	Data	450	5.56	1.58	2019-07-09	STF-001125	STF-001125-1	4928795	30304046	143	50	16.26	104.5	-22.6	35	Human fetal astrocytes	Synaptosomes pHrodo red
Row 973	LP01-302-2_5	SP190705_03	8392	9	13	Data	450	5.56	2.24	2019-07-09	STF-001046	STF-001046-1	5119096	30273396	138	43	16.91	108.7	-18	31.2	Human fetal astrocytes	Synaptosomes pHrodo red
Row 974	LP01-302-2_5	SP190705_03	8392	9	14	Data	450	5.56	1.79	2019-07-09	STF-001126	STF-001126-1	2482518	28182594	118	23	8.81	56.6	0.5	19.5	Human fetal astrocytes	Synaptosomes pHrodo red
Row 975	LP01-302-2_5	SP190705_03	8392	9	15	Data	450	5.56	1.9	2019-07-09	STF-001047	STF-001047-1	4950807	29841752	129	46	16.59	106.6	-9.7	35.7	Human fetal astrocytes	Synaptosomes pHrodo red
Row 976	LP01-302-2_5	SP190705_03	8392	9	16	Data	450	5.56	1.62	2019-07-09	STF-001127	STF-001127-1	4675404	29246568	124	45	15.99	102.7	-5.1	36.3	Human fetal astrocytes	Synaptosomes pHrodo red
Row 977	LP01-302-2_5	SP190705_03	8392	9	17	Data	450	5.56	1.67	2019-07-09	STF-001048	STF-001048-1	3769407	28079784	137	35	13.42	86.3	-17.1	25.5	Human fetal astrocytes	Synaptosomes pHrodo red
Row 978	LP01-302-2_5	SP190705_03	8392	9	18	Data	450	5.56	1.32	2019-07-09	STF-001128	STF-001128-1	5332849	33081438	148	53	16.12	103.6	-27.2	35.8	Human fetal astrocytes	Synaptosomes pHrodo red
Row 979	LP01-302-2_5	SP190705_03	8392	9	19	Data	450	5.56	1.31	2019-07-09	STF-001049	STF-001049-1	3884581	28853672	134	38	13.46	86.5	-14.3	28.4	Human fetal astrocytes	Synaptosomes pHrodo red
Row 980	LP01-302-2_5	SP190705_03	8392	9	20	Data	450	5.56	2.03	2019-07-09	STF-001129	STF-001129-1	4286303	26962636	128	48	15.9	102.2	-8.8	37.5	Human fetal astrocytes	Synaptosomes pHrodo red
Row 981	LP01-302-2_5	SP190705_03	8392	9	21	Data	450	5.56	1.37	2019-07-09	STF-001050	STF-001050-1	4216367	29887668	130	48	14.11	90.7	-10.6	36.9	Human fetal astrocytes	Synaptosomes pHrodo red
Row 982	LP01-302-2_5	SP190705_03	8392	9	22	Data	450	5.56	2.48	2019-07-09	STF-001130	STF-001130-1	4267968	26695012	127	48	15.99	102.8	-7.8	37.8	Human fetal astrocytes	Synaptosomes pHrodo red
Row 983	LP01-302-2_5	SP190705_03	8392	9	23	Positive Control				2019-07-09			0	16463754	57	0	0	0	56.7	0	Human fetal astrocytes	None
Row 984	LP01-302-2_5	SP190705_03	8392	9	24	Low Control				2019-07-09			0	149963968	10	0	0	0	100	0	Human fetal astrocytes	Synaptosomes pHrodo red
Row 985	LP01-302-2_5	SP190705_03	8392	10	1	High Control				2019-07-09			4520835	27443480	131	50	16.47	105.9	-11.5	38.2	Human fetal astrocytes	Synaptosomes pHrodo red
Row 986	LP01-302-2_5	SP190705_03	8392	10	2	High Control				2019-07-09			4841801	29869124	132	51	16.21	104.2	-12.4	38.6	Human fetal astrocytes	Synaptosomes pHrodo red
Row 987	LP01-302-2_5	SP190705_03	8392	10	3	Data	450	5.56	2.42	2019-07-09	STF-001201	STF-001201-1	4232611	27738688	132	48	15.26	98.1	-12.4	36.4	Human fetal astrocytes	Synaptosomes pHrodo red
Row 988	LP01-302-2_5	SP190705_03	8392	10	4	Data	450	5.56	2.66	2019-07-09	STF-001279	STF-001279-1	4193183	28583544	136	47	14.67	94.3	-16.1	34.6	Human fetal astrocytes	Synaptosomes pHrodo red
Row 989	LP01-302-2_5	SP190705_03	8392	10	5	Data	450	5.56	1.76	2019-07-09	STF-001202	STF-001202-1	4185430	27303584	128	45	15.33	98.5	-8.8	35.2	Human fetal astrocytes	Synaptosomes pHrodo red
Row 990	LP01-302-2_5	SP190705_03	8392	10	6	Data	450	5.56	2.19	2019-07-09	STF-001280	STF-001280-1	3775090	26968768	126	41	14	90	-6.9	32.5	Human fetal astrocytes	Synaptosomes pHrodo red
Row 991	LP01-302-2_5	SP190705_03	8392	10	7	Data	450	5.56	0.87	2019-07-09	STF-001203	STF-001203-1	5335736	28153320	124	57	18.95	121.8	-5.1	46	Human fetal astrocytes	Synaptosomes pHrodo red
Row 992	LP01-302-2_5	SP190705_03	8392	10	8	Data	450	5.56	2.32	2019-07-09	STF-001281	STF-001281-1	5548739	31178516	134	55	17.8	114.4	-14.3	41	Human fetal astrocytes	Synaptosomes pHrodo red
Row 993	LP01-302-2_5	SP190705_03	8392	10	9	Data	450	5.56	1.55	2019-07-09	STF-001204	STF-001204-1	4908108	29264900	129	48	16.77	107.8	-9.7	37.2	Human fetal astrocytes	Synaptosomes pHrodo red
Row 994	LP01-302-2_5	SP190705_03	8392	10	10	Data	450	5.56	2.01	2019-07-09	STF-078950	STF-078950-2	4495007	27949964	122	45	16.08	103.4	-3.2	36.9	Human fetal astrocytes	Synaptosomes pHrodo red
Row 995	LP01-302-2_5	SP190705_03	8392	10	11	Data	450	5.56	1.24	2019-07-09	STF-001205	STF-001205-1	5984441	33370676	159	61	17.93	115.3	-37.3	38.4	Human fetal astrocytes	Synaptosomes pHrodo red
Row 996	LP01-302-2_5	SP190705_03	8392	10	12	Data	450	5.56	0.98	2019-07-09	STF-001282	STF-001282-1	4675968	32513400	149	43	14.38	92.4	-28.1	28.9	Human fetal astrocytes	Synaptosomes pHrodo red
Row 997	LP01-302-2_5	SP190705_03	8392	10	13	Data	450	5.56	2.55	2019-07-09	STF-001206	STF-001206-1	4344160	29367596	136	43	14.79	95.1	-16.1	31.6	Human fetal astrocytes	Synaptosomes pHrodo red
Row 998	LP01-302-2_5	SP190705_03	8392	10	14	Data	450	5.56	1.11	2019-07-09	STF-001283	STF-001283-1	4588796	28238748	127	45	16.25	104.4	-7.8	35.4	Human fetal astrocytes	Synaptosomes pHrodo red
Row 999	LP01-302-2_5	SP190705_03	8392	10	15	Data	450	5.56	1.92	2019-07-09	STF-001207	STF-001207-1	5346960	27412408	132	52	19.51	125.4	-12.4	39.4	Human fetal astrocytes	Synaptosomes pHrodo red
Row 1000	LP01-302-2_5	SP190705_03	8392	10	16	Data	450	5.56	2.08	2019-07-09	STF-001284	STF-001284-1	4623476	31125912	138	45	14.85	95.5	-18	32.6	Human fetal astrocytes	Synaptosomes pHrodo red
Row 1001	LP01-302-2_5	SP190705_03	8392	10	17	Data	450	5.56	1	2019-07-09	STF-001208	STF-001208-1	4994441	30963176	138	47	16.13	103.7	-18	34.1	Human fetal astrocytes	Synaptosomes pHrodo red
Row 1002	LP01-302-2_5	SP190705_03	8392	10	18	Data	450	5.56	1.9	2019-07-09	STF-001285	STF-001285-1	4337245	28010306	131	37	15.48	99.5	-11.5	28.2	Human fetal astrocytes	Synaptosomes pHrodo red
Row 1003	LP01-302-2_5	SP190705_03	8392	10	19	Data	450	5.56	2.01	2019-07-09	STF-001209	STF-001209-1	5201091	32337470	142	49	16.08	103.4	-21.7	34.5	Human fetal astrocytes	Synaptosomes pHrodo red
Row 1004	LP01-302-2_5	SP190705_03	8392	10	20	Data	450	5.56	1.94	2019-07-09	STF-001286	STF-001286-1	5425810	30388596	130	53	17.85	114.8	-10.6	40.8	Human fetal astrocytes	Synaptosomes pHrodo red
Row 1005	LP01-302-2_5	SP190705_03	8392	10	21	Data	450	5.56	1.42	2019-07-09	STF-001210	STF-001210-1	4469765	29712154	124	44	15.04	96.7	-5.1	35.5	Human fetal astrocytes	Synaptosomes pHrodo red
Row 1006	LP01-302-2_5	SP190705_03	8392	10	22	Data	450	5.56	1.84	2019-07-09	STF-001287	STF-001287-1	3962116	33910152	130	31	11.68	75.1	-10.6	23.8	Human fetal astrocytes	Synaptosomes pHrodo red
Row 1007	LP01-302-2_5	SP190705_03	8392	10	23	Positive Control				2019-07-09			0	17456924	70	0	0	0	44.7	0	Human fetal astrocytes	None
Row 1008	LP01-302-2_5	SP190705_03	8392	10	24	Low Control				2019-07-09			259477	6570336	6	1	3.95	25.4	103.7	16.7	Human fetal astrocytes	Synaptosomes pHrodo red
Row 1009	LP01-302-2_5	SP190705_03	8392	11	1	High Control				2019-07-09			3855999	26684900	120	43	14.45	92.9	-1.4	35.8	Human fetal astrocytes	Synaptosomes pHrodo red
Row 1010	LP01-302-2_5	SP190705_03	8392	11	2	High Control				2019-07-09			5398156	28724320	123	61	18.79	120.8	-4.1	49.6	Human fetal astrocytes	Synaptosomes pHrodo red
Row 1011	LP01-302-2_5	SP190705_03	8392	11	3	Data	450	5.56	1.05	2019-07-09	STF-001051	STF-001051-1	4805705	28504440	124	50	16.86	108.4	-5.1	40.3	Human fetal astrocytes	Synaptosomes pHrodo red
Row 1012	LP01-302-2_5	SP190705_03	8392	11	4	Data	450	5.56	1.62	2019-07-09	STF-001131	STF-001131-1	6236923	28233996	124	66	22.09	142	-5.1	53.2	Human fetal astrocytes	Synaptosomes pHrodo red
Row 1013	LP01-302-2_5	SP190705_03	8392	11	5	Data	450	5.56	2.04	2019-07-09	STF-001052	STF-001052-1	4199434	26951064	121	38	15.58	100.1	-2.3	31.4	Human fetal astrocytes	Synaptosomes pHrodo red
Row 1014	LP01-302-2_5	SP190705_03	8392	11	6	Data	450	5.56	1.33	2019-07-09	STF-001132	STF-001132-1	3738102	29247576	147	44	12.78	82.1	-26.3	29.9	Human fetal astrocytes	Synaptosomes pHrodo red
Row 1015	LP01-302-2_5	SP190705_03	8392	11	7	Data	450	5.56	1.77	2019-07-09	STF-001053	STF-001053-1	3486381	20768050	101	39	16.79	107.9	16.1	38.6	Human fetal astrocytes	Synaptosomes pHrodo red
Row 1016	LP01-302-2_5	SP190705_03	8392	11	8	Data	450	5.56	0.74	2019-07-09	STF-001133	STF-001133-1	4822560	28673068	137	54	16.82	108.1	-17.1	39.4	Human fetal astrocytes	Synaptosomes pHrodo red
Row 1017	LP01-302-2_5	SP190705_03	8392	11	9	Data	450	5.56	2.35	2019-07-09	STF-001054	STF-001054-1	5406567	28444200	119	54	19.01	122.2	-0.5	45.4	Human fetal astrocytes	Synaptosomes pHrodo red
Row 1018	LP01-302-2_5	SP190705_03	8392	11	10	Data	450	5.56	0.65	2019-07-09	STF-001134	STF-001134-1	5280599	28674916	126	53	18.42	118.4	-6.9	42.1	Human fetal astrocytes	Synaptosomes pHrodo red
Row 1019	LP01-302-2_5	SP190705_03	8392	11	11	Data	450	5.56	1.42	2019-07-09	STF-001055	STF-001055-1	3782372	26155124	126	42	14.46	92.9	-6.9	33.3	Human fetal astrocytes	Synaptosomes pHrodo red
Row 1020	LP01-302-2_5	SP190705_03	8392	11	12	Data	450	5.56	1.87	2019-07-09	STF-001135	STF-001135-1	5622092	29756676	137	52	18.89	121.4	-17.1	38	Human fetal astrocytes	Synaptosomes pHrodo red
Row 1021	LP01-302-2_5	SP190705_03	8392	11	13	Data	450	5.56	0.75	2019-07-09	STF-001056	STF-001056-1	4651939	29272286	134	50	15.89	102.1	-14.3	37.3	Human fetal astrocytes	Synaptosomes pHrodo red
Row 1022	LP01-302-2_5	SP190705_03	8392	11	14	Data	450	5.56	1.45	2019-07-09	STF-001136	STF-001136-1	4438379	28782594	133	48	15.42	99.1	-13.4	36.1	Human fetal astrocytes	Synaptosomes pHrodo red
Row 1023	LP01-302-2_5	SP190705_03	8392	11	15	Data	450	5.56	2.59	2019-07-09	STF-001057	STF-001057-1	4411018	31779448	135	46	13.88	89.2	-15.2	34.1	Human fetal astrocytes	Synaptosomes pHrodo red
Row 1024	LP01-302-2_5	SP190705_03	8392	11	16	Data	450	5.56	1.86	2019-07-09	STF-001137	STF-001137-1	3126676	28773058	144	30	10.87	69.8	-23.5	20.8	Human fetal astrocytes	Synaptosomes pHrodo red
Row 1025	LP01-302-2_5	SP190705_03	8392	11	17	Data	450	5.56	1.1	2019-07-09	STF-001058	STF-001058-1	4945264	30065574	136	48	16.45	105.7	-16.1	35.3	Human fetal astrocytes	Synaptosomes pHrodo red
Row 1026	LP01-302-2_5	SP190705_03	8392	11	18	Data	450	5.56	0.71	2019-07-09	STF-001138	STF-001138-1	3860653	27349364	118	31	14.12	90.7	0.5	26.3	Human fetal astrocytes	Synaptosomes pHrodo red
Row 1027	LP01-302-2_5	SP190705_03	8392	11	19	Data	450	5.56	1.92	2019-07-09	STF-001059	STF-001059-1	4686315	27050664	115	46	17.32	111.3	3.2	40	Human fetal astrocytes	Synaptosomes pHrodo red
Row 1028	LP01-302-2_5	SP190705_03	8392	11	20	Data	450	5.56	1.27	2019-07-09	STF-001139	STF-001139-1	4917340	32968528	136	41	14.92	95.9	-16.1	30.1	Human fetal astrocytes	Synaptosomes pHrodo red
Row 1029	LP01-302-2_5	SP190705_03	8392	11	21	Data	450	5.56	1.27	2019-07-09	STF-001060	STF-001060-1	3573515	25946698	121	35	13.77	88.5	-2.3	28.9	Human fetal astrocytes	Synaptosomes pHrodo red
Row 1030	LP01-302-2_5	SP190705_03	8392	11	22	Data	450	5.56	2.88	2019-07-09	STF-001140	STF-001140-1	2745601	28630966	124	32	9.59	61.6	-5.1	25.8	Human fetal astrocytes	Synaptosomes pHrodo red
Row 1031	LP01-302-2_5	SP190705_03	8392	11	23	Positive Control				2019-07-09			0	18001392	69	0	0	0	45.6	0	Human fetal astrocytes	None
Row 1032	LP01-302-2_5	SP190705_03	8392	11	24	Low Control				2019-07-09			172451	2583407	5	3	6.68	42.9	104.6	60	Human fetal astrocytes	Synaptosomes pHrodo red
Row 1033	LP01-302-2_5	SP190705_03	8392	12	1	High Control				2019-07-09			3697513	22133492	111	42	16.71	107.4	6.9	37.8	Human fetal astrocytes	Synaptosomes pHrodo red
Row 1034	LP01-302-2_5	SP190705_03	8392	12	2	High Control				2019-07-09			4976762	28131018	127	50	17.69	113.7	-7.8	39.4	Human fetal astrocytes	Synaptosomes pHrodo red
Row 1035	LP01-302-2_5	SP190705_03	8392	12	3	Data	450	5.56	1.98	2019-07-09	STF-001211	STF-001211-1	3467445	29935520	143	40	11.58	74.4	-22.6	28	Human fetal astrocytes	Synaptosomes pHrodo red
Row 1036	LP01-302-2_5	SP190705_03	8392	12	4	Data	450	5.56	2.35	2019-07-09	STF-001288	STF-001288-1	3185705	35051568	129	27	9.09	58.4	-9.7	20.9	Human fetal astrocytes	Synaptosomes pHrodo red
Row 1037	LP01-302-2_5	SP190705_03	8392	12	5	Data	450	5.56	1.71	2019-07-09	STF-089963	STF-089963-2	4827765	28830828	132	47	16.75	107.6	-12.4	35.6	Human fetal astrocytes	Synaptosomes pHrodo red
Row 1038	LP01-302-2_5	SP190705_03	8392	12	6	Data	450	5.56	1.31	2019-07-09	STF-001289	STF-001289-1	6292451	33124142	147	65	19	122.1	-26.3	44.2	Human fetal astrocytes	Synaptosomes pHrodo red
Row 1039	LP01-302-2_5	SP190705_03	8392	12	7	Data	450	5.56	2.18	2019-07-09	STF-001212	STF-001212-1	5259684	28421376	123	51	18.51	118.9	-4.1	41.5	Human fetal astrocytes	Synaptosomes pHrodo red
Row 1040	LP01-302-2_5	SP190705_03	8392	12	8	Data	450	5.56	1.4	2019-07-09	STF-001290	STF-001290-1	5985510	31443392	137	59	19.04	122.3	-17.1	43.1	Human fetal astrocytes	Synaptosomes pHrodo red
Row 1041	LP01-302-2_5	SP190705_03	8392	12	9	Data	450	5.56	1.92	2019-07-09	STF-001213	STF-001213-1	3649167	32265480	147	36	11.31	72.7	-26.3	24.5	Human fetal astrocytes	Synaptosomes pHrodo red
Row 1042	LP01-302-2_5	SP190705_03	8392	12	10	Data	450	5.56	1.68	2019-07-09	STF-001291	STF-001291-1	4844250	29640470	137	48	16.34	105	-17.1	35	Human fetal astrocytes	Synaptosomes pHrodo red
Row 1043	LP01-302-2_5	SP190705_03	8392	12	11	Data	450	5.56	2.67	2019-07-09	STF-001214	STF-001214-1	3314662	26525218	127	35	12.5	80.3	-7.8	27.6	Human fetal astrocytes	Synaptosomes pHrodo red
Row 1044	LP01-302-2_5	SP190705_03	8392	12	12	Data	450	5.56	2.59	2019-07-09	STF-001292	STF-001292-1	3735992	23195522	112	42	16.11	103.5	6	37.5	Human fetal astrocytes	Synaptosomes pHrodo red
Row 1045	LP01-302-2_5	SP190705_03	8392	12	13	Data	450	5.56	2.53	2019-07-09	STF-001215	STF-001215-1	4897881	29499964	133	43	16.6	106.7	-13.4	32.3	Human fetal astrocytes	Synaptosomes pHrodo red
Row 1046	LP01-302-2_5	SP190705_03	8392	12	14	Data	450	5.56	2.87	2019-07-09	STF-001293	STF-001293-1	5809785	31121524	126	57	18.67	120	-6.9	45.2	Human fetal astrocytes	Synaptosomes pHrodo red
Row 1047	LP01-302-2_5	SP190705_03	8392	12	15	Data	450	5.56	1.79	2019-07-09	STF-001216	STF-001216-1	4585090	29384252	132	40	15.6	100.3	-12.4	30.3	Human fetal astrocytes	Synaptosomes pHrodo red
Row 1048	LP01-302-2_5	SP190705_03	8392	12	16	Data	450	5.56	1.25	2019-07-09	STF-001294	STF-001294-1	4017780	25730904	125	43	15.61	100.4	-6	34.4	Human fetal astrocytes	Synaptosomes pHrodo red
Row 1049	LP01-302-2_5	SP190705_03	8392	12	17	Data	450	5.56	2.05	2019-07-09	STF-001217	STF-001217-1	5729379	30952980	128	50	18.51	119	-8.8	39.1	Human fetal astrocytes	Synaptosomes pHrodo red
Row 1050	LP01-302-2_5	SP190705_03	8392	12	18	Data	450	5.56	1.02	2019-07-09	STF-001295	STF-001295-1	4203016	31928856	139	36	13.16	84.6	-18.9	25.9	Human fetal astrocytes	Synaptosomes pHrodo red
Row 1051	LP01-302-2_5	SP190705_03	8392	12	19	Data	450	5.56	1.61	2019-07-09	STF-001218	STF-001218-1	4313973	28796034	129	42	14.98	96.3	-9.7	32.6	Human fetal astrocytes	Synaptosomes pHrodo red
Row 1052	LP01-302-2_5	SP190705_03	8392	12	20	Data	450	5.56	1.74	2019-07-09	STF-001296	STF-001296-1	4507132	29854816	128	43	15.1	97	-8.8	33.6	Human fetal astrocytes	Synaptosomes pHrodo red
Row 1053	LP01-302-2_5	SP190705_03	8392	12	21	Data	450	5.56	1.92	2019-07-09	STF-001219	STF-001219-1	4061662	32389980	146	41	12.54	80.6	-25.3	28.1	Human fetal astrocytes	Synaptosomes pHrodo red
Row 1054	LP01-302-2_5	SP190705_03	8392	12	22	Data	450	5.56	1.37	2019-07-09	STF-001297	STF-001297-1	4325899	28633552	120	41	15.11	97.1	-1.4	34.2	Human fetal astrocytes	Synaptosomes pHrodo red
Row 1055	LP01-302-2_5	SP190705_03	8392	12	23	Positive Control				2019-07-09			0	19000564	74	0	0	0	41	0	Human fetal astrocytes	None
Row 1056	LP01-302-2_5	SP190705_03	8392	12	24	Low Control				2019-07-09			101874	2615027	3	1	3.9	25	106.5	33.3	Human fetal astrocytes	Synaptosomes pHrodo red
Row 1057	LP01-302-2_5	SP190705_03	8392	13	1	High Control				2019-07-09			5614204	27217286	128	60	20.63	132.6	-8.8	46.9	Human fetal astrocytes	Synaptosomes pHrodo red
Row 1058	LP01-302-2_5	SP190705_03	8392	13	2	High Control				2019-07-09			5826916	31823536	149	63	18.31	117.7	-28.1	42.3	Human fetal astrocytes	Synaptosomes pHrodo red
Row 1059	LP01-302-2_5	SP190705_03	8392	13	3	Data	450	5.56	1.09	2019-07-09	STF-001061	STF-001061-1	4643065	32352644	137	49	14.35	92.2	-17.1	35.8	Human fetal astrocytes	Synaptosomes pHrodo red
Row 1060	LP01-302-2_5	SP190705_03	8392	13	4	Data	450	5.56	0.64	2019-07-09	STF-001141	STF-001141-1	9036157	36731956	145	79	24.6	158.1	-24.4	54.5	Human fetal astrocytes	Synaptosomes pHrodo red
Row 1061	LP01-302-2_5	SP190705_03	8392	13	5	Data	450	5.56	1.5	2019-07-09	STF-001062	STF-001062-1	3979920	25000552	118	43	15.92	102.3	0.5	36.4	Human fetal astrocytes	Synaptosomes pHrodo red
Row 1062	LP01-302-2_5	SP190705_03	8392	13	6	Data	450	5.56	1.45	2019-07-09	STF-001142	STF-001142-1	4953336	30360610	146	54	16.32	104.9	-25.3	37	Human fetal astrocytes	Synaptosomes pHrodo red
Row 1063	LP01-302-2_5	SP190705_03	8392	13	7	Data	450	5.56	1.18	2019-07-09	STF-001063	STF-001063-1	6296621	32628736	139	62	19.3	124	-18.9	44.6	Human fetal astrocytes	Synaptosomes pHrodo red
Row 1064	LP01-302-2_5	SP190705_03	8392	13	8	Data	450	5.56	3.32	2019-07-09	STF-001143	STF-001143-1	5371004	34315396	154	53	15.65	100.6	-32.7	34.4	Human fetal astrocytes	Synaptosomes pHrodo red
Row 1065	LP01-302-2_5	SP190705_03	8392	13	9	Data	450	5.56	1.02	2019-07-09	STF-001064	STF-001064-1	5578601	29835078	124	48	18.7	120.2	-5.1	38.7	Human fetal astrocytes	Synaptosomes pHrodo red
Row 1066	LP01-302-2_5	SP190705_03	8392	13	10	Data	450	5.56	1.61	2019-07-09	STF-001144	STF-001144-1	3704551	25612940	114	41	14.46	93	4.1	36	Human fetal astrocytes	Synaptosomes pHrodo red
Row 1067	LP01-302-2_5	SP190705_03	8392	13	11	Data	450	5.56	1.5	2019-07-09	STF-001065	STF-001065-1	4319578	31145024	149	41	13.87	89.1	-28.1	27.5	Human fetal astrocytes	Synaptosomes pHrodo red
Row 1068	LP01-302-2_5	SP190705_03	8392	13	12	Data	450	5.56	2.18	2019-07-09	STF-001145	STF-001145-1	4527361	25559752	127	50	17.71	113.8	-7.8	39.4	Human fetal astrocytes	Synaptosomes pHrodo red
Row 1069	LP01-302-2_5	SP190705_03	8392	13	13	Data	450	5.56	0.9	2019-07-09	STF-001066	STF-001066-1	5645630	34266116	159	53	16.48	105.9	-37.3	33.3	Human fetal astrocytes	Synaptosomes pHrodo red
Row 1070	LP01-302-2_5	SP190705_03	8392	13	14	Data	450	5.56	1.48	2019-07-09	STF-001146	STF-001146-1	5951231	29611740	135	53	20.1	129.2	-15.2	39.3	Human fetal astrocytes	Synaptosomes pHrodo red
Row 1071	LP01-302-2_5	SP190705_03	8392	13	15	Data	450	5.56	0.94	2019-07-09	STF-001067	STF-001067-1	3047894	29561836	139	31	10.31	66.3	-18.9	22.3	Human fetal astrocytes	Synaptosomes pHrodo red
Row 1072	LP01-302-2_5	SP190705_03	8392	13	16	Data	450	5.56	1.69	2019-07-09	STF-001147	STF-001147-1	4356954	27098664	124	45	16.08	103.3	-5.1	36.3	Human fetal astrocytes	Synaptosomes pHrodo red
Row 1073	LP01-302-2_5	SP190705_03	8392	13	17	Data	450	5.56	1.68	2019-07-09	STF-001068	STF-001068-1	3835388	24844464	132	40	15.44	99.2	-12.4	30.3	Human fetal astrocytes	Synaptosomes pHrodo red
Row 1074	LP01-302-2_5	SP190705_03	8392	13	18	Data	450	5.56	2.22	2019-07-09	STF-001148	STF-001148-1	5968272	37614048	152	55	15.87	102	-30.9	36.2	Human fetal astrocytes	Synaptosomes pHrodo red
Row 1075	LP01-302-2_5	SP190705_03	8392	13	19	Data	450	5.56	2.1	2019-07-09	STF-001069	STF-001069-1	3499251	27844612	144	38	12.57	80.8	-23.5	26.4	Human fetal astrocytes	Synaptosomes pHrodo red
Row 1076	LP01-302-2_5	SP190705_03	8392	13	20	Data	450	5.56	4.36	2019-07-09	STF-001149	STF-001149-1	3147074	30288684	145	32	10.39	66.8	-24.4	22.1	Human fetal astrocytes	Synaptosomes pHrodo red
Row 1077	LP01-302-2_5	SP190705_03	8392	13	21	Data	450	5.56	1.16	2019-07-09	STF-001070	STF-001070-1	3463370	35516288	146	30	9.75	62.7	-25.3	20.5	Human fetal astrocytes	Synaptosomes pHrodo red
Row 1078	LP01-302-2_5	SP190705_03	8392	13	22	Data	450	5.56	1.76	2019-07-09	STF-001150	STF-001150-1	3357228	27931212	126	32	12.02	77.3	-6.9	25.4	Human fetal astrocytes	Synaptosomes pHrodo red
Row 1079	LP01-302-2_5	SP190705_03	8392	13	23	Positive Control				2019-07-09			0	14344498	57	0	0	0	56.7	0	Human fetal astrocytes	None
Row 1080	LP01-302-2_5	SP190705_03	8392	13	24	Low Control				2019-07-09			507638	10809387	12	6	4.7	30.2	98.2	50	Human fetal astrocytes	Synaptosomes pHrodo red
Row 1081	LP01-302-2_5	SP190705_03	8392	14	1	High Control				2019-07-09			4637836	23261848	102	53	19.94	128.1	15.2	52	Human fetal astrocytes	Synaptosomes pHrodo red
Row 1082	LP01-302-2_5	SP190705_03	8392	14	2	High Control				2019-07-09			5008616	27800282	133	55	18.02	115.8	-13.4	41.4	Human fetal astrocytes	Synaptosomes pHrodo red
Row 1083	LP01-302-2_5	SP190705_03	8392	14	3	Data	450	5.56	1.24	2019-07-09	STF-001220	STF-001220-1	5173809	28798384	120	48	17.97	115.5	-1.4	40	Human fetal astrocytes	Synaptosomes pHrodo red
Row 1084	LP01-302-2_5	SP190705_03	8392	14	4	Data	450	5.56	2.32	2019-07-09	STF-001298	STF-001298-1	4984916	29950586	136	46	16.64	107	-16.1	33.8	Human fetal astrocytes	Synaptosomes pHrodo red
Row 1085	LP01-302-2_5	SP190705_03	8392	14	5	Data	450	5.56	2.24	2019-07-09	STF-001221	STF-001221-1	5546531	26675732	113	54	20.79	133.6	5.1	47.8	Human fetal astrocytes	Synaptosomes pHrodo red
Row 1086	LP01-302-2_5	SP190705_03	8392	14	6	Data	450	5.56	1.21	2019-07-09	STF-001299	STF-001299-1	4800468	29196132	144	47	16.44	105.7	-23.5	32.6	Human fetal astrocytes	Synaptosomes pHrodo red
Row 1087	LP01-302-2_5	SP190705_03	8392	14	7	Data	450	5.56	2.34	2019-07-09	STF-001222	STF-001222-1	3847949	34510880	154	40	11.15	71.7	-32.7	26	Human fetal astrocytes	Synaptosomes pHrodo red
Row 1088	LP01-302-2_5	SP190705_03	8392	14	8	Data	450	5.56	1.73	2019-07-09	STF-001300	STF-001300-1	4207677	26324636	125	45	15.98	102.7	-6	36	Human fetal astrocytes	Synaptosomes pHrodo red
Row 1089	LP01-302-2_5	SP190705_03	8392	14	9	Data	450	5.56	2.3	2019-07-09	STF-001223	STF-001223-1	4077731	25199644	119	41	16.18	104	-0.5	34.5	Human fetal astrocytes	Synaptosomes pHrodo red
Row 1090	LP01-302-2_5	SP190705_03	8392	14	10	Data	450	5.56	1.09	2019-07-09	STF-001301	STF-001301-1	4602000	25638040	121	54	17.95	115.4	-2.3	44.6	Human fetal astrocytes	Synaptosomes pHrodo red
Row 1091	LP01-302-2_5	SP190705_03	8392	14	11	Data	450	5.56	2.21	2019-07-09	STF-001224	STF-001224-1	4037530	29956498	130	43	13.48	86.6	-10.6	33.1	Human fetal astrocytes	Synaptosomes pHrodo red
Row 1092	LP01-302-2_5	SP190705_03	8392	14	12	Data	450	5.56	1.43	2019-07-09	STF-001302	STF-001302-1	4248566	27337398	123	41	15.54	99.9	-4.1	33.3	Human fetal astrocytes	Synaptosomes pHrodo red
Row 1093	LP01-302-2_5	SP190705_03	8392	14	13	Data	450	5.56	1.87	2019-07-09	STF-001225	STF-001225-1	3703697	27682064	136	42	13.38	86	-16.1	30.9	Human fetal astrocytes	Synaptosomes pHrodo red
Row 1094	LP01-302-2_5	SP190705_03	8392	14	14	Data	450	5.56	1.35	2019-07-09	STF-001303	STF-001303-1	3666779	27944464	133	38	13.12	84.3	-13.4	28.6	Human fetal astrocytes	Synaptosomes pHrodo red
Row 1095	LP01-302-2_5	SP190705_03	8392	14	15	Data	450	5.56	1.69	2019-07-09	STF-001226	STF-001226-1	4528059	33777256	140	46	13.41	86.2	-19.8	32.9	Human fetal astrocytes	Synaptosomes pHrodo red
Row 1096	LP01-302-2_5	SP190705_03	8392	14	16	Data	450	5.56	1.95	2019-07-09	STF-001304	STF-001304-1	3337354	26195326	133	33	12.74	81.9	-13.4	24.8	Human fetal astrocytes	Synaptosomes pHrodo red
Row 1097	LP01-302-2_5	SP190705_03	8392	14	17	Data	450	5.56	1.08	2019-07-09	STF-001227	STF-001227-1	3531949	28381236	140	41	12.44	80	-19.8	29.3	Human fetal astrocytes	Synaptosomes pHrodo red
Row 1098	LP01-302-2_5	SP190705_03	8392	14	18	Data	450	5.56	1.86	2019-07-09	STF-001305	STF-001305-1	4712075	30905628	150	48	15.25	98	-29	32	Human fetal astrocytes	Synaptosomes pHrodo red
Row 1099	LP01-302-2_5	SP190705_03	8392	14	19	Data	450	5.56	1.54	2019-07-09	STF-001228	STF-001228-1	3757346	26106326	124	34	14.39	92.5	-5.1	27.4	Human fetal astrocytes	Synaptosomes pHrodo red
Row 1100	LP01-302-2_5	SP190705_03	8392	14	20	Data	450	5.56	1.46	2019-07-09	STF-001306	STF-001306-1	4908831	29026234	124	45	16.91	108.7	-5.1	36.3	Human fetal astrocytes	Synaptosomes pHrodo red
Row 1101	LP01-302-2_5	SP190705_03	8392	14	21	Data	450	5.56	2.06	2019-07-09	STF-001229	STF-001229-1	3577820	27424420	121	29	13.05	83.8	-2.3	24	Human fetal astrocytes	Synaptosomes pHrodo red
Row 1102	LP01-302-2_5	SP190705_03	8392	14	22	Data	450	5.56	2.22	2019-07-09	STF-001307	STF-001307-1	3146568	25697824	112	30	12.24	78.7	6	26.8	Human fetal astrocytes	Synaptosomes pHrodo red
Row 1103	LP01-302-2_5	SP190705_03	8392	14	23	Positive Control				2019-07-09			0	13376215	54	0	0	0	59.4	0	Human fetal astrocytes	None
Row 1104	LP01-302-2_5	SP190705_03	8392	14	24	Low Control				2019-07-09			178833	5010837	8	3	3.57	22.9	101.8	37.5	Human fetal astrocytes	Synaptosomes pHrodo red
Row 1105	LP01-302-2_5	SP190705_03	8392	15	1	High Control				2019-07-09			4120776	20953472	99	49	19.67	126.4	18	49.5	Human fetal astrocytes	Synaptosomes pHrodo red
Row 1106	LP01-302-2_5	SP190705_03	8392	15	2	High Control				2019-07-09			3764473	26426368	120	37	14.25	91.6	-1.4	30.8	Human fetal astrocytes	Synaptosomes pHrodo red
Row 1107	LP01-302-2_5	SP190705_03	8392	15	3	Data	450	5.56	1	2019-07-09	STF-001071	STF-001071-1	3337083	23914364	108	37	13.95	89.7	9.7	34.3	Human fetal astrocytes	Synaptosomes pHrodo red
Row 1108	LP01-302-2_5	SP190705_03	8392	15	4	Data	450	5.56	1.8	2019-07-09	STF-001151	STF-001151-1	3798970	26456136	114	39	14.36	92.3	4.1	34.2	Human fetal astrocytes	Synaptosomes pHrodo red
Row 1109	LP01-302-2_5	SP190705_03	8392	15	5	Data	450	5.56	0.76	2019-07-09	STF-001072	STF-001072-1	5060609	27671604	128	56	18.29	117.5	-8.8	43.8	Human fetal astrocytes	Synaptosomes pHrodo red
Row 1110	LP01-302-2_5	SP190705_03	8392	15	6	Data	450	5.56	1.59	2019-07-09	STF-001152	STF-001152-1	4049361	25473884	116	40	15.9	102.2	2.3	34.5	Human fetal astrocytes	Synaptosomes pHrodo red
Row 1111	LP01-302-2_5	SP190705_03	8392	15	7	Data	450	5.56	3.38	2019-07-09	STF-001073	STF-001073-1	3907520	23848332	110	36	16.38	105.3	7.8	32.7	Human fetal astrocytes	Synaptosomes pHrodo red
Row 1112	LP01-302-2_5	SP190705_03	8392	15	8	Data	450	5.56	1.51	2019-07-09	STF-001153	STF-001153-1	5951751	31924684	131	57	18.64	119.8	-11.5	43.5	Human fetal astrocytes	Synaptosomes pHrodo red
Row 1113	LP01-302-2_5	SP190705_03	8392	15	9	Data	450	5.56	2.01	2019-07-09	STF-001074	STF-001074-1	4284514	26498250	113	45	16.17	103.9	5.1	39.8	Human fetal astrocytes	Synaptosomes pHrodo red
Row 1114	LP01-302-2_5	SP190705_03	8392	15	10	Data	450	5.56	2.39	2019-07-09	STF-001154	STF-001154-1	3208953	28342542	123	38	11.32	72.8	-4.1	30.9	Human fetal astrocytes	Synaptosomes pHrodo red
Row 1115	LP01-302-2_5	SP190705_03	8392	15	11	Data	450	5.56	2.1	2019-07-09	STF-001075	STF-001075-1	4281769	27440730	118	39	15.6	100.3	0.5	33.1	Human fetal astrocytes	Synaptosomes pHrodo red
Row 1116	LP01-302-2_5	SP190705_03	8392	15	12	Data	450	5.56	3.56	2019-07-09	STF-001155	STF-001155-1	3428072	24883116	121	35	13.78	88.5	-2.3	28.9	Human fetal astrocytes	Synaptosomes pHrodo red
Row 1117	LP01-302-2_5	SP190705_03	8392	15	13	Data	450	5.56	1.69	2019-07-09	STF-001076	STF-001076-1	3228078	25278036	117	37	12.77	82.1	1.4	31.6	Human fetal astrocytes	Synaptosomes pHrodo red
Row 1118	LP01-302-2_5	SP190705_03	8392	15	14	Data	450	5.56	1.48	2019-07-09	STF-001156	STF-001156-1	4223846	30840342	143	41	13.7	88	-22.6	28.7	Human fetal astrocytes	Synaptosomes pHrodo red
Row 1119	LP01-302-2_5	SP190705_03	8392	15	15	Data	450	5.56	0.97	2019-07-09	STF-001077	STF-001077-1	5577875	28851368	122	50	19.33	124.3	-3.2	41	Human fetal astrocytes	Synaptosomes pHrodo red
Row 1120	LP01-302-2_5	SP190705_03	8392	15	16	Data	450	5.56	1.25	2019-07-09	STF-001157	STF-001157-1	3763693	25308872	110	36	14.87	95.6	7.8	32.7	Human fetal astrocytes	Synaptosomes pHrodo red
Row 1121	LP01-302-2_5	SP190705_03	8392	15	17	Data	450	5.56	1.56	2019-07-09	STF-001078	STF-001078-1	2270549	24001584	111	24	9.46	60.8	6.9	21.6	Human fetal astrocytes	Synaptosomes pHrodo red
Row 1122	LP01-302-2_5	SP190705_03	8392	15	18	Data	450	5.56	1.19	2019-07-09	STF-001158	STF-001158-1	3856402	24183238	101	39	15.95	102.5	16.1	38.6	Human fetal astrocytes	Synaptosomes pHrodo red
Row 1123	LP01-302-2_5	SP190705_03	8392	15	19	Data	450	5.56	1.48	2019-07-09	STF-001079	STF-001079-1	3567801	27350052	126	37	13.04	83.8	-6.9	29.4	Human fetal astrocytes	Synaptosomes pHrodo red
Row 1124	LP01-302-2_5	SP190705_03	8392	15	20	Data	450	5.56	2.27	2019-07-09	STF-001159	STF-001159-1	3169809	26721658	124	31	11.86	76.2	-5.1	25	Human fetal astrocytes	Synaptosomes pHrodo red
Row 1125	LP01-302-2_5	SP190705_03	8392	15	21	Data	450	5.56	0.77	2019-07-09	STF-001080	STF-001080-1	3100863	24990108	111	33	12.41	79.8	6.9	29.7	Human fetal astrocytes	Synaptosomes pHrodo red
Row 1126	LP01-302-2_5	SP190705_03	8392	15	22	Data	450	5.56	0.67	2019-07-09	STF-001160	STF-001160-1	3510631	23438208	108	39	14.98	96.3	9.7	36.1	Human fetal astrocytes	Synaptosomes pHrodo red
Row 1127	LP01-302-2_5	SP190705_03	8392	15	23	Positive Control				2019-07-09			76309	18193368	73	1	0.42	2.7	41.9	1.4	Human fetal astrocytes	None
Row 1128	LP01-302-2_5	SP190705_03	8392	15	24	Low Control				2019-07-09			314284	4829192	8	5	6.51	41.8	101.8	62.5	Human fetal astrocytes	Synaptosomes pHrodo red
Row 1129	LP01-302-2_5	SP190705_03	8392	16	1	High Control				2019-07-09			3169535	21819800	96	35	14.53	93.4	20.7	36.5	Human fetal astrocytes	Synaptosomes pHrodo red
Row 1130	LP01-302-2_5	SP190705_03	8392	16	2	High Control				2019-07-09			3464286	25264360	105	36	13.71	88.1	12.4	34.3	Human fetal astrocytes	Synaptosomes pHrodo red
Row 1131	LP01-302-2_5	SP190705_03	8392	16	3	Data	450	5.56	1.24	2019-07-09	STF-001230	STF-001230-1	3103608	20666248	88	35	15.02	96.5	28.1	39.8	Human fetal astrocytes	Synaptosomes pHrodo red
Row 1132	LP01-302-2_5	SP190705_03	8392	16	4	Data	450	5.56	1.39	2019-07-09	STF-001308	STF-001308-1	3660562	19274110	78	40	18.99	122.1	37.3	51.3	Human fetal astrocytes	Synaptosomes pHrodo red
Row 1133	LP01-302-2_5	SP190705_03	8392	16	5	Data	450	5.56	2.42	2019-07-09	STF-001231	STF-001231-1	4310772	27730062	117	45	15.55	99.9	1.4	38.5	Human fetal astrocytes	Synaptosomes pHrodo red
Row 1134	LP01-302-2_5	SP190705_03	8392	16	6	Data	450	5.56	1.89	2019-07-09	STF-001309	STF-001309-1	2107759	18701484	90	24	11.27	72.4	26.3	26.7	Human fetal astrocytes	Synaptosomes pHrodo red
Row 1135	LP01-302-2_5	SP190705_03	8392	16	7	Data	450	5.56	1.63	2019-07-09	STF-001232	STF-001232-1	4006236	26277564	109	37	15.25	98	8.8	33.9	Human fetal astrocytes	Synaptosomes pHrodo red
Row 1136	LP01-302-2_5	SP190705_03	8392	16	8	Data	450	5.56	2.92	2019-07-09	STF-001310	STF-001310-1	3768144	24251748	99	34	15.54	99.9	18	34.3	Human fetal astrocytes	Synaptosomes pHrodo red
Row 1137	LP01-302-2_5	SP190705_03	8392	16	9	Data	450	5.56	1.36	2019-07-09	STF-001233	STF-001233-1	4785720	24591420	109	48	19.46	125.1	8.8	44	Human fetal astrocytes	Synaptosomes pHrodo red
Row 1138	LP01-302-2_5	SP190705_03	8392	16	10	Data	450	5.56	2.05	2019-07-09	STF-001311	STF-001311-1	3095060	22880392	103	34	13.53	86.9	14.3	33	Human fetal astrocytes	Synaptosomes pHrodo red
Row 1139	LP01-302-2_5	SP190705_03	8392	16	11	Data	450	5.56	1.89	2019-07-09	STF-001234	STF-001234-1	3265067	23166100	110	37	14.09	90.6	7.8	33.6	Human fetal astrocytes	Synaptosomes pHrodo red
Row 1140	LP01-302-2_5	SP190705_03	8392	16	12	Data	450	5.56	1.92	2019-07-09	STF-001312	STF-001312-1	4182186	26801316	123	43	15.6	100.3	-4.1	35	Human fetal astrocytes	Synaptosomes pHrodo red
Row 1141	LP01-302-2_5	SP190705_03	8392	16	13	Data	450	5.56	2.21	2019-07-09	STF-001235	STF-001235-1	3501195	25205756	114	40	13.89	89.3	4.1	35.1	Human fetal astrocytes	Synaptosomes pHrodo red
Row 1142	LP01-302-2_5	SP190705_03	8392	16	14	Data	450	5.56	1.55	2019-07-09	STF-001313	STF-001313-1	4454180	28078402	126	50	15.86	102	-6.9	39.7	Human fetal astrocytes	Synaptosomes pHrodo red
Row 1143	LP01-302-2_5	SP190705_03	8392	16	15	Data	450	5.56	2.76	2019-07-09	STF-001236	STF-001236-1	5108488	29826648	111	48	17.13	110.1	6.9	43.2	Human fetal astrocytes	Synaptosomes pHrodo red
Row 1144	LP01-302-2_5	SP190705_03	8392	16	16	Data	450	5.56	2.91	2019-07-09	STF-001314	STF-001314-1	579119	3653484	27	7	15.85	101.9	84.3	25.9	Human fetal astrocytes	Synaptosomes pHrodo red
Row 1145	LP01-302-2_5	SP190705_03	8392	16	17	Data	450	5.56	1.45	2019-07-09	STF-001237	STF-001237-1	4759467	28079484	116	45	16.95	108.9	2.3	38.8	Human fetal astrocytes	Synaptosomes pHrodo red
Row 1146	LP01-302-2_5	SP190705_03	8392	16	18	Data	450	5.56	1.19	2019-07-09	STF-001315	STF-001315-1	3772997	19932116	96	45	18.93	121.7	20.7	46.9	Human fetal astrocytes	Synaptosomes pHrodo red
Row 1147	LP01-302-2_5	SP190705_03	8392	16	19	Data	450	5.56	1.91	2019-07-09	STF-001238	STF-001238-1	4275795	28177796	121	44	15.17	97.5	-2.3	36.4	Human fetal astrocytes	Synaptosomes pHrodo red
Row 1148	LP01-302-2_5	SP190705_03	8392	16	20	Data	450	5.56	1.45	2019-07-09	STF-001316	STF-001316-1	3823797	26239892	105	38	14.57	93.7	12.4	36.2	Human fetal astrocytes	Synaptosomes pHrodo red
Row 1149	LP01-302-2_5	SP190705_03	8392	16	21	Data	450	5.56	2	2019-07-09	STF-001239	STF-001239-1	3636926	22483324	89	32	16.18	104	27.2	36	Human fetal astrocytes	Synaptosomes pHrodo red
Row 1150	LP01-302-2_5	SP190705_03	8392	16	22	Data	450	5.56	1.52	2019-07-09	STF-001317	STF-001317-1	4660691	25164270	110	43	18.52	119	7.8	39.1	Human fetal astrocytes	Synaptosomes pHrodo red
Row 1151	LP01-302-2_5	SP190705_03	8392	16	23	Positive Control				2019-07-09			0	13535943	70	0	0	0	44.7	0	Human fetal astrocytes	None
Row 1152	LP01-302-2_5	SP190705_03	8392	16	24	Low Control				2019-07-09			615878	11861535	17	8	5.19	33.4	93.5	47.1	Human fetal astrocytes	Synaptosomes pHrodo red
Row 1153	LP01-302-5_0	SP190705_04	8390	1	1	High Control				2019-07-09			3361261	23836572	97	33	14.1	102.9	20.2	34	Human fetal astrocytes	Synaptosomes pHrodo red
Row 1154	LP01-302-5_0	SP190705_04	8390	1	2	High Control				2019-07-09			3857229	29182072	127	39	13.22	96.4	-6.7	30.7	Human fetal astrocytes	Synaptosomes pHrodo red
Row 1155	LP01-302-5_0	SP190705_04	8390	1	3	Data	450	11.11	2.17	2019-07-09	STF-001001	STF-001001-1	5701730	35457936	142	57	16.08	117.3	-20.2	40.1	Human fetal astrocytes	Synaptosomes pHrodo red
Row 1156	LP01-302-5_0	SP190705_04	8390	1	4	Data	450	11.11	1.81	2019-07-09	STF-001081	STF-001081-1	4495513	31402920	122	46	14.32	104.5	-2.2	37.7	Human fetal astrocytes	Synaptosomes pHrodo red
Row 1157	LP01-302-5_0	SP190705_04	8390	1	5	Data	450	11.11	2.25	2019-07-09	STF-001002	STF-001002-1	4078197	33429876	149	49	12.2	89	-26.5	32.9	Human fetal astrocytes	Synaptosomes pHrodo red
Row 1158	LP01-302-5_0	SP190705_04	8390	1	6	Data	450	11.11	1.46	2019-07-09	STF-001082	STF-001082-1	5014509	31524020	130	46	15.91	116.1	-9.4	35.4	Human fetal astrocytes	Synaptosomes pHrodo red
Row 1159	LP01-302-5_0	SP190705_04	8390	1	7	Data	450	11.11	0.66	2019-07-09	STF-001003	STF-001003-1	3805787	30112574	136	41	12.64	92.2	-14.8	30.1	Human fetal astrocytes	Synaptosomes pHrodo red
Row 1160	LP01-302-5_0	SP190705_04	8390	1	8	Data	450	11.11	2.34	2019-07-09	STF-001083	STF-001083-1	4678425	31398424	141	42	14.9	108.7	-19.3	29.8	Human fetal astrocytes	Synaptosomes pHrodo red
Row 1161	LP01-302-5_0	SP190705_04	8390	1	9	Data	450	11.11	2.09	2019-07-09	STF-001004	STF-001004-1	3434739	25310764	108	37	13.57	99	10.3	34.3	Human fetal astrocytes	Synaptosomes pHrodo red
Row 1162	LP01-302-5_0	SP190705_04	8390	1	10	Data	450	11.11	3.66	2019-07-09	STF-001084	STF-001084-1	4254092	33654192	148	47	12.64	92.2	-25.6	31.8	Human fetal astrocytes	Synaptosomes pHrodo red
Row 1163	LP01-302-5_0	SP190705_04	8390	1	11	Data	450	11.11	1.15	2019-07-09	STF-001005	STF-001005-1	3829237	26521544	118	41	14.44	105.3	1.3	34.7	Human fetal astrocytes	Synaptosomes pHrodo red
Row 1164	LP01-302-5_0	SP190705_04	8390	1	12	Data	450	11.11	1.85	2019-07-09	STF-001085	STF-001085-1	5336138	36614996	139	54	14.57	106.3	-17.5	38.8	Human fetal astrocytes	Synaptosomes pHrodo red
Row 1165	LP01-302-5_0	SP190705_04	8390	1	13	Data	450	11.11	1.95	2019-07-09	STF-001006	STF-001006-1	3544997	31089936	129	35	11.4	83.2	-8.5	27.1	Human fetal astrocytes	Synaptosomes pHrodo red
Row 1166	LP01-302-5_0	SP190705_04	8390	1	14	Data	450	11.11	3.27	2019-07-09	STF-001086	STF-001086-1	3651633	27429992	130	41	13.31	97.1	-9.4	31.5	Human fetal astrocytes	Synaptosomes pHrodo red
Row 1167	LP01-302-5_0	SP190705_04	8390	1	15	Data	450	11.11	2.43	2019-07-09	STF-001007	STF-001007-1	3883834	32424696	143	40	11.98	87.4	-21.1	28	Human fetal astrocytes	Synaptosomes pHrodo red
Row 1168	LP01-302-5_0	SP190705_04	8390	1	16	Data	450	11.11	4.18	2019-07-09	STF-001087	STF-001087-1	4955498	31968300	140	52	15.5	113.1	-18.4	37.1	Human fetal astrocytes	Synaptosomes pHrodo red
Row 1169	LP01-302-5_0	SP190705_04	8390	1	17	Data	450	11.11	2.5	2019-07-09	STF-001008	STF-001008-1	3743425	35475580	149	39	10.55	77	-26.5	26.2	Human fetal astrocytes	Synaptosomes pHrodo red
Row 1170	LP01-302-5_0	SP190705_04	8390	1	18	Data	450	11.11	3.6	2019-07-09	STF-001088	STF-001088-1	3742711	29950752	131	39	12.5	91.2	-10.3	29.8	Human fetal astrocytes	Synaptosomes pHrodo red
Row 1171	LP01-302-5_0	SP190705_04	8390	1	19	Data	450	11.11	3.49	2019-07-09	STF-001009	STF-001009-1	4145461	29370824	136	45	14.11	103	-14.8	33.1	Human fetal astrocytes	Synaptosomes pHrodo red
Row 1172	LP01-302-5_0	SP190705_04	8390	1	20	Data	450	11.11	1.61	2019-07-09	STF-001089	STF-001089-1	3595739	27438176	110	32	13.1	95.6	8.5	29.1	Human fetal astrocytes	Synaptosomes pHrodo red
Row 1173	LP01-302-5_0	SP190705_04	8390	1	21	Data	450	11.11	4.28	2019-07-09	STF-001010	STF-001010-1	4665810	33148576	118	43	14.08	102.7	1.3	36.4	Human fetal astrocytes	Synaptosomes pHrodo red
Row 1174	LP01-302-5_0	SP190705_04	8390	1	22	Data	450	11.11	1.12	2019-07-09	STF-001090	STF-001090-1	4314884	31579958	114	37	13.66	99.7	4.9	32.5	Human fetal astrocytes	Synaptosomes pHrodo red
Row 1175	LP01-302-5_0	SP190705_04	8390	1	23	Positive Control				2019-07-09			0	16882362	67	0	0	0	47.1	0	Human fetal astrocytes	None
Row 1176	LP01-302-5_0	SP190705_04	8390	1	24	Low Control				2019-07-09			118447	3506699	7	2	3.38	24.6	100.9	28.6	Human fetal astrocytes	Synaptosomes pHrodo red
Row 1177	LP01-302-5_0	SP190705_04	8390	2	1	High Control				2019-07-09			3590139	27923888	117	44	12.86	93.8	2.2	37.6	Human fetal astrocytes	Synaptosomes pHrodo red
Row 1178	LP01-302-5_0	SP190705_04	8390	2	2	High Control				2019-07-09			4811034	32071372	137	53	15	109.5	-15.7	38.7	Human fetal astrocytes	Synaptosomes pHrodo red
Row 1179	LP01-302-5_0	SP190705_04	8390	2	3	Data	450	11.11	2.69	2019-07-09	STF-001161	STF-001161-1	4076404	27174928	117	44	15	109.5	2.2	37.6	Human fetal astrocytes	Synaptosomes pHrodo red
Row 1180	LP01-302-5_0	SP190705_04	8390	2	4	Data	450	11.11	4.26	2019-07-09	STF-001240	STF-001240-1	1638383	26970148	109	17	6.07	44.3	9.4	15.6	Human fetal astrocytes	Synaptosomes pHrodo red
Row 1181	LP01-302-5_0	SP190705_04	8390	2	5	Data	450	11.11	4.05	2019-07-09	STF-001162	STF-001162-1	3938053	29810220	130	44	13.21	96.4	-9.4	33.8	Human fetal astrocytes	Synaptosomes pHrodo red
Row 1182	LP01-302-5_0	SP190705_04	8390	2	6	Data	450	11.11	13.36	2019-07-09	STF-001241	STF-001241-1	4662419	34284976	141	47	13.6	99.2	-19.3	33.3	Human fetal astrocytes	Synaptosomes pHrodo red
Row 1183	LP01-302-5_0	SP190705_04	8390	2	7	Data	450	11.11	2.37	2019-07-09	STF-001163	STF-001163-1	5552732	31519458	139	57	17.62	128.5	-17.5	41	Human fetal astrocytes	Synaptosomes pHrodo red
Row 1184	LP01-302-5_0	SP190705_04	8390	2	8	Data	450	11.11	2.03	2019-07-09	STF-001242	STF-001242-1	4898860	32987340	140	51	14.85	108.4	-18.4	36.4	Human fetal astrocytes	Synaptosomes pHrodo red
Row 1185	LP01-302-5_0	SP190705_04	8390	2	9	Data	450	11.11	3.12	2019-07-09	STF-001164	STF-001164-1	2698061	36537712	127	27	7.38	53.9	-6.7	21.3	Human fetal astrocytes	Synaptosomes pHrodo red
Row 1186	LP01-302-5_0	SP190705_04	8390	2	10	Data	450	11.11	3.86	2019-07-09	STF-001243	STF-001243-1	3973824	32914540	149	43	12.07	88.1	-26.5	28.9	Human fetal astrocytes	Synaptosomes pHrodo red
Row 1187	LP01-302-5_0	SP190705_04	8390	2	11	Data	450	11.11	4.64	2019-07-09	STF-001165	STF-001165-1	4181249	28188788	131	42	14.83	108.2	-10.3	32.1	Human fetal astrocytes	Synaptosomes pHrodo red
Row 1188	LP01-302-5_0	SP190705_04	8390	2	12	Data	450	11.11	3	2019-07-09	STF-001244	STF-001244-1	5244491	28216124	117	54	18.59	135.6	2.2	46.2	Human fetal astrocytes	Synaptosomes pHrodo red
Row 1189	LP01-302-5_0	SP190705_04	8390	2	13	Data	450	11.11	3.07	2019-07-09	STF-001166	STF-001166-1	5092527	32247176	142	54	15.79	115.2	-20.2	38	Human fetal astrocytes	Synaptosomes pHrodo red
Row 1190	LP01-302-5_0	SP190705_04	8390	2	14	Data	450	11.11	3.6	2019-07-09	STF-001245	STF-001245-1	5068466	33290084	125	44	15.23	111.1	-4.9	35.2	Human fetal astrocytes	Synaptosomes pHrodo red
Row 1191	LP01-302-5_0	SP190705_04	8390	2	15	Data	450	11.11	2.6	2019-07-09	STF-001167	STF-001167-1	5854785	34952216	125	48	16.75	122.2	-4.9	38.4	Human fetal astrocytes	Synaptosomes pHrodo red
Row 1192	LP01-302-5_0	SP190705_04	8390	2	16	Data	450	11.11	4.88	2019-07-09	STF-001246	STF-001246-1	3998555	31251966	141	41	12.79	93.4	-19.3	29.1	Human fetal astrocytes	Synaptosomes pHrodo red
Row 1193	LP01-302-5_0	SP190705_04	8390	2	17	Data	450	11.11	3.21	2019-07-09	STF-001168	STF-001168-1	5118788	32361784	134	50	15.82	115.4	-13	37.3	Human fetal astrocytes	Synaptosomes pHrodo red
Row 1194	LP01-302-5_0	SP190705_04	8390	2	18	Data	450	11.11	2.18	2019-07-09	STF-001247	STF-001247-1	4751465	27652914	114	53	17.18	125.4	4.9	46.5	Human fetal astrocytes	Synaptosomes pHrodo red
Row 1195	LP01-302-5_0	SP190705_04	8390	2	19	Data	450	11.11	3.25	2019-07-09	STF-001169	STF-001169-1	4817922	32305448	133	52	14.91	108.8	-12.1	39.1	Human fetal astrocytes	Synaptosomes pHrodo red
Row 1196	LP01-302-5_0	SP190705_04	8390	2	20	Data	450	11.11	3.95	2019-07-09	STF-001248	STF-001248-1	4321993	31186368	129	41	13.86	101.1	-8.5	31.8	Human fetal astrocytes	Synaptosomes pHrodo red
Row 1197	LP01-302-5_0	SP190705_04	8390	2	21	Data	450	11.11	3.91	2019-07-09	STF-001170	STF-001170-1	3273176	29580784	127	34	11.07	80.7	-6.7	26.8	Human fetal astrocytes	Synaptosomes pHrodo red
Row 1198	LP01-302-5_0	SP190705_04	8390	2	22	Data	450	11.11	3.27	2019-07-09	STF-001249	STF-001249-1	5443249	34916224	131	49	15.59	113.7	-10.3	37.4	Human fetal astrocytes	Synaptosomes pHrodo red
Row 1199	LP01-302-5_0	SP190705_04	8390	2	23	Positive Control				2019-07-09			0	17811942	67	0	0	0	47.1	0	Human fetal astrocytes	None
Row 1200	LP01-302-5_0	SP190705_04	8390	2	24	Low Control				2019-07-09			262434	6779605	8	3	3.87	28.2	100	37.5	Human fetal astrocytes	Synaptosomes pHrodo red
Row 1201	LP01-302-5_0	SP190705_04	8390	3	1	High Control				2019-07-09			3668458	30376532	131	40	12.08	88.1	-10.3	30.5	Human fetal astrocytes	Synaptosomes pHrodo red
Row 1202	LP01-302-5_0	SP190705_04	8390	3	2	High Control				2019-07-09			3448436	25884288	115	37	13.32	97.2	4	32.2	Human fetal astrocytes	Synaptosomes pHrodo red
Row 1203	LP01-302-5_0	SP190705_04	8390	3	3	Data	450	11.11	2.37	2019-07-09	STF-001011	STF-001011-1	3283610	23706184	121	39	13.85	101.1	-1.3	32.2	Human fetal astrocytes	Synaptosomes pHrodo red
Row 1204	LP01-302-5_0	SP190705_04	8390	3	4	Data	450	11.11	1.79	2019-07-09	STF-001091	STF-001091-1	4755877	28477424	121	41	16.7	121.9	-1.3	33.9	Human fetal astrocytes	Synaptosomes pHrodo red
Row 1205	LP01-302-5_0	SP190705_04	8390	3	5	Data	450	11.11	4.83	2019-07-09	STF-001012	STF-001012-1	4130491	29983056	128	44	13.78	100.5	-7.6	34.4	Human fetal astrocytes	Synaptosomes pHrodo red
Row 1206	LP01-302-5_0	SP190705_04	8390	3	6	Data	450	11.11	3.58	2019-07-09	STF-001092	STF-001092-1	4317762	26452600	107	42	16.32	119.1	11.2	39.3	Human fetal astrocytes	Synaptosomes pHrodo red
Row 1207	LP01-302-5_0	SP190705_04	8390	3	7	Data	450	11.11	3.88	2019-07-09	STF-001013	STF-001013-1	4213028	27713056	118	38	15.2	110.9	1.3	32.2	Human fetal astrocytes	Synaptosomes pHrodo red
Row 1208	LP01-302-5_0	SP190705_04	8390	3	8	Data	450	11.11	2.17	2019-07-09	STF-001093	STF-001093-1	4494208	28974920	133	44	15.51	113.2	-12.1	33.1	Human fetal astrocytes	Synaptosomes pHrodo red
Row 1209	LP01-302-5_0	SP190705_04	8390	3	9	Data	450	11.11	4.67	2019-07-09	STF-001014	STF-001014-1	3993739	25191458	106	38	15.85	115.7	12.1	35.8	Human fetal astrocytes	Synaptosomes pHrodo red
Row 1210	LP01-302-5_0	SP190705_04	8390	3	10	Data	450	11.11	3.55	2019-07-09	STF-001094	STF-001094-1	3868526	27070386	111	36	14.29	104.3	7.6	32.4	Human fetal astrocytes	Synaptosomes pHrodo red
Row 1211	LP01-302-5_0	SP190705_04	8390	3	11	Data	450	11.11	2.97	2019-07-09	STF-001015	STF-001015-1	4763838	29253788	124	44	16.28	118.8	-4	35.5	Human fetal astrocytes	Synaptosomes pHrodo red
Row 1212	LP01-302-5_0	SP190705_04	8390	3	12	Data	450	11.11	4.06	2019-07-09	STF-001095	STF-001095-1	2961914	31572134	135	32	9.38	68.5	-13.9	23.7	Human fetal astrocytes	Synaptosomes pHrodo red
Row 1213	LP01-302-5_0	SP190705_04	8390	3	13	Data	450	11.11	4.36	2019-07-09	STF-001016	STF-001016-1	4002793	32390136	141	44	12.36	90.2	-19.3	31.2	Human fetal astrocytes	Synaptosomes pHrodo red
Row 1214	LP01-302-5_0	SP190705_04	8390	3	14	Data	450	11.11	4.24	2019-07-09	STF-001096	STF-001096-1	3290863	26665442	106	28	12.34	90	12.1	26.4	Human fetal astrocytes	Synaptosomes pHrodo red
Row 1215	LP01-302-5_0	SP190705_04	8390	3	15	Data	450	11.11	3.27	2019-07-09	STF-001017	STF-001017-1	4343193	32392220	128	42	13.41	97.8	-7.6	32.8	Human fetal astrocytes	Synaptosomes pHrodo red
Row 1216	LP01-302-5_0	SP190705_04	8390	3	16	Data	450	11.11	1.92	2019-07-09	STF-001097	STF-001097-1	3949239	26726540	112	37	14.78	107.8	6.7	33	Human fetal astrocytes	Synaptosomes pHrodo red
Row 1217	LP01-302-5_0	SP190705_04	8390	3	17	Data	450	11.11	2.19	2019-07-09	STF-001018	STF-001018-1	5108027	30925372	128	45	16.52	120.5	-7.6	35.2	Human fetal astrocytes	Synaptosomes pHrodo red
Row 1218	LP01-302-5_0	SP190705_04	8390	3	18	Data	450	11.11	1.93	2019-07-09	STF-001098	STF-001098-1	3421572	27210032	123	36	12.57	91.7	-3.1	29.3	Human fetal astrocytes	Synaptosomes pHrodo red
Row 1219	LP01-302-5_0	SP190705_04	8390	3	19	Data	450	11.11	5.97	2019-07-09	STF-001019	STF-001019-1	3635694	27565916	126	36	13.19	96.2	-5.8	28.6	Human fetal astrocytes	Synaptosomes pHrodo red
Row 1220	LP01-302-5_0	SP190705_04	8390	3	20	Data	450	11.11	1.61	2019-07-09	STF-001099	STF-001099-1	4232570	31571308	130	41	13.41	97.8	-9.4	31.5	Human fetal astrocytes	Synaptosomes pHrodo red
Row 1221	LP01-302-5_0	SP190705_04	8390	3	21	Data	450	11.11	5.05	2019-07-09	STF-001020	STF-001020-1	3376042	32826606	146	30	10.28	75	-23.8	20.5	Human fetal astrocytes	Synaptosomes pHrodo red
Row 1222	LP01-302-5_0	SP190705_04	8390	3	22	Data	450	11.11	4.23	2019-07-09	STF-001100	STF-001100-1	4603894	31109542	118	41	14.8	108	1.3	34.7	Human fetal astrocytes	Synaptosomes pHrodo red
Row 1223	LP01-302-5_0	SP190705_04	8390	3	23	Positive Control				2019-07-09			0	22199588	80	0	0	0	35.4	0	Human fetal astrocytes	None
Row 1224	LP01-302-5_0	SP190705_04	8390	3	24	Low Control				2019-07-09			100748	2547323	5	2	3.96	28.9	102.7	40	Human fetal astrocytes	Synaptosomes pHrodo red
Row 1225	LP01-302-5_0	SP190705_04	8390	4	1	High Control				2019-07-09			4238444	31810536	126	46	13.32	97.2	-5.8	36.5	Human fetal astrocytes	Synaptosomes pHrodo red
Row 1226	LP01-302-5_0	SP190705_04	8390	4	2	High Control				2019-07-09			2833419	24192536	113	35	11.71	85.5	5.8	31	Human fetal astrocytes	Synaptosomes pHrodo red
Row 1227	LP01-302-5_0	SP190705_04	8390	4	3	Data	450	11.11	8.34	2019-07-09	STF-001171	STF-001171-1	3035714	32942390	140	36	9.22	67.2	-18.4	25.7	Human fetal astrocytes	Synaptosomes pHrodo red
Row 1228	LP01-302-5_0	SP190705_04	8390	4	4	Data	450	11.11	3.56	2019-07-09	STF-001250	STF-001250-1	4668661	31501492	134	49	14.82	108.1	-13	36.6	Human fetal astrocytes	Synaptosomes pHrodo red
Row 1229	LP01-302-5_0	SP190705_04	8390	4	5	Data	450	11.11	1.71	2019-07-09	STF-001172	STF-001172-1	3482034	31322696	140	32	11.12	81.1	-18.4	22.9	Human fetal astrocytes	Synaptosomes pHrodo red
Row 1230	LP01-302-5_0	SP190705_04	8390	4	6	Data	450	11.11	1.13	2019-07-09	STF-001251	STF-001251-1	4040443	30291298	127	38	13.34	97.3	-6.7	29.9	Human fetal astrocytes	Synaptosomes pHrodo red
Row 1231	LP01-302-5_0	SP190705_04	8390	4	7	Data	450	11.11	3.68	2019-07-09	STF-001173	STF-001173-1	5220588	33706284	130	43	15.49	113	-9.4	33.1	Human fetal astrocytes	Synaptosomes pHrodo red
Row 1232	LP01-302-5_0	SP190705_04	8390	4	8	Data	450	11.11	1.88	2019-07-09	STF-001252	STF-001252-1	3757794	27978036	124	43	13.43	98	-4	34.7	Human fetal astrocytes	Synaptosomes pHrodo red
Row 1233	LP01-302-5_0	SP190705_04	8390	4	9	Data	450	11.11	4.78	2019-07-09	STF-001174	STF-001174-1	5064613	30641376	132	54	16.53	120.6	-11.2	40.9	Human fetal astrocytes	Synaptosomes pHrodo red
Row 1234	LP01-302-5_0	SP190705_04	8390	4	10	Data	450	11.11	3.29	2019-07-09	STF-001253	STF-001253-1	4060551	30055080	141	46	13.51	98.6	-19.3	32.6	Human fetal astrocytes	Synaptosomes pHrodo red
Row 1235	LP01-302-5_0	SP190705_04	8390	4	11	Data	450	11.11	3.7	2019-07-09	STF-001175	STF-001175-1	5078426	29189948	119	44	17.4	126.9	0.4	37	Human fetal astrocytes	Synaptosomes pHrodo red
Row 1236	LP01-302-5_0	SP190705_04	8390	4	12	Data	450	11.11	3.18	2019-07-09	STF-001254	STF-001254-1	3677103	25752458	107	39	14.28	104.2	11.2	36.4	Human fetal astrocytes	Synaptosomes pHrodo red
Row 1237	LP01-302-5_0	SP190705_04	8390	4	13	Data	450	11.11	5.14	2019-07-09	STF-001176	STF-001176-1	5163535	27185742	121	48	18.99	138.6	-1.3	39.7	Human fetal astrocytes	Synaptosomes pHrodo red
Row 1238	LP01-302-5_0	SP190705_04	8390	4	14	Data	450	11.11	3.56	2019-07-09	STF-001255	STF-001255-1	4259462	30144376	136	40	14.13	103.1	-14.8	29.4	Human fetal astrocytes	Synaptosomes pHrodo red
Row 1239	LP01-302-5_0	SP190705_04	8390	4	15	Data	450	11.11	2.82	2019-07-09	STF-001177	STF-001177-1	3529572	28919162	142	42	12.2	89.1	-20.2	29.6	Human fetal astrocytes	Synaptosomes pHrodo red
Row 1240	LP01-302-5_0	SP190705_04	8390	4	16	Data	450	11.11	4.09	2019-07-09	STF-001256	STF-001256-1	3030486	30594874	148	34	9.91	72.3	-25.6	23	Human fetal astrocytes	Synaptosomes pHrodo red
Row 1241	LP01-302-5_0	SP190705_04	8390	4	17	Data	450	11.11	2.96	2019-07-09	STF-001178	STF-001178-1	4080698	29181576	128	42	13.98	102	-7.6	32.8	Human fetal astrocytes	Synaptosomes pHrodo red
Row 1242	LP01-302-5_0	SP190705_04	8390	4	18	Data	450	11.11	4.5	2019-07-09	STF-001257	STF-001257-1	3986299	30204236	129	40	13.2	96.3	-8.5	31	Human fetal astrocytes	Synaptosomes pHrodo red
Row 1243	LP01-302-5_0	SP190705_04	8390	4	19	Data	450	11.11	3.23	2019-07-09	STF-001179	STF-001179-1	3837796	31715732	138	36	12.1	88.3	-16.6	26.1	Human fetal astrocytes	Synaptosomes pHrodo red
Row 1244	LP01-302-5_0	SP190705_04	8390	4	20	Data	450	11.11	6.16	2019-07-09	STF-001258	STF-001258-1	3767179	32421690	132	36	11.62	84.8	-11.2	27.3	Human fetal astrocytes	Synaptosomes pHrodo red
Row 1245	LP01-302-5_0	SP190705_04	8390	4	21	Data	450	11.11	2.05	2019-07-09	STF-001180	STF-001180-1	4532142	30473828	128	39	14.87	108.5	-7.6	30.5	Human fetal astrocytes	Synaptosomes pHrodo red
Row 1246	LP01-302-5_0	SP190705_04	8390	4	22	Data	450	11.11	5.11	2019-07-09	STF-001259	STF-001259-1	3711393	31080192	128	38	11.94	87.1	-7.6	29.7	Human fetal astrocytes	Synaptosomes pHrodo red
Row 1247	LP01-302-5_0	SP190705_04	8390	4	23	Positive Control				2019-07-09			0	17476576	69	0	0	0	45.3	0	Human fetal astrocytes	None
Row 1248	LP01-302-5_0	SP190705_04	8390	4	24	Low Control				2019-07-09			389279	3784087	3	3	10.29	75.1	104.5	100	Human fetal astrocytes	Synaptosomes pHrodo red
Row 1249	LP01-302-5_0	SP190705_04	8390	5	1	High Control				2019-07-09			3441718	27522228	120	40	12.51	91.2	-0.4	33.3	Human fetal astrocytes	Synaptosomes pHrodo red
Row 1250	LP01-302-5_0	SP190705_04	8390	5	2	High Control				2019-07-09			3951527	32797880	147	41	12.05	87.9	-24.7	27.9	Human fetal astrocytes	Synaptosomes pHrodo red
Row 1251	LP01-302-5_0	SP190705_04	8390	5	3	Data	450	11.11	4.15	2019-07-09	STF-001021	STF-001021-1	4866636	32095580	127	52	15.16	110.6	-6.7	40.9	Human fetal astrocytes	Synaptosomes pHrodo red
Row 1252	LP01-302-5_0	SP190705_04	8390	5	4	Data	450	11.11	2.25	2019-07-09	STF-001101	STF-001101-1	4709599	32327688	139	50	14.57	106.3	-17.5	36	Human fetal astrocytes	Synaptosomes pHrodo red
Row 1253	LP01-302-5_0	SP190705_04	8390	5	5	Data	450	11.11	4.8	2019-07-09	STF-001022	STF-001022-1	4575206	29449132	115	44	15.54	113.4	4	38.3	Human fetal astrocytes	Synaptosomes pHrodo red
Row 1254	LP01-302-5_0	SP190705_04	8390	5	6	Data	450	11.11	1.51	2019-07-09	STF-001102	STF-001102-1	3649072	26711370	127	41	13.66	99.7	-6.7	32.3	Human fetal astrocytes	Synaptosomes pHrodo red
Row 1255	LP01-302-5_0	SP190705_04	8390	5	7	Data	450	11.11	1.12	2019-07-09	STF-001023	STF-001023-1	4931005	29066604	126	48	16.96	123.8	-5.8	38.1	Human fetal astrocytes	Synaptosomes pHrodo red
Row 1256	LP01-302-5_0	SP190705_04	8390	5	8	Data	450	11.11	1.23	2019-07-09	STF-001103	STF-001103-1	4904500	33345350	137	46	14.71	107.3	-15.7	33.6	Human fetal astrocytes	Synaptosomes pHrodo red
Row 1257	LP01-302-5_0	SP190705_04	8390	5	9	Data	450	11.11	5.18	2019-07-09	STF-001024	STF-001024-1	3309833	29462530	128	36	11.23	82	-7.6	28.1	Human fetal astrocytes	Synaptosomes pHrodo red
Row 1258	LP01-302-5_0	SP190705_04	8390	5	10	Data	450	11.11	3.46	2019-07-09	STF-001104	STF-001104-1	3400840	28520794	128	37	11.92	87	-7.6	28.9	Human fetal astrocytes	Synaptosomes pHrodo red
Row 1259	LP01-302-5_0	SP190705_04	8390	5	11	Data	450	11.11	2.17	2019-07-09	STF-001025	STF-001025-1	4737871	27586708	109	46	17.17	125.3	9.4	42.2	Human fetal astrocytes	Synaptosomes pHrodo red
Row 1260	LP01-302-5_0	SP190705_04	8390	5	12	Data	450	11.11	3.33	2019-07-09	STF-001105	STF-001105-1	4011727	28535064	125	39	14.06	102.6	-4.9	31.2	Human fetal astrocytes	Synaptosomes pHrodo red
Row 1261	LP01-302-5_0	SP190705_04	8390	5	13	Data	450	11.11	3.63	2019-07-09	STF-001026	STF-001026-1	4223671	35814288	147	39	11.79	86	-24.7	26.5	Human fetal astrocytes	Synaptosomes pHrodo red
Row 1262	LP01-302-5_0	SP190705_04	8390	5	14	Data	450	11.11	3.26	2019-07-09	STF-001106	STF-001106-1	3854550	31376020	135	37	12.29	89.6	-13.9	27.4	Human fetal astrocytes	Synaptosomes pHrodo red
Row 1263	LP01-302-5_0	SP190705_04	8390	5	15	Data	450	11.11	3.08	2019-07-09	STF-001027	STF-001027-1	4103704	31783000	149	45	12.91	94.2	-26.5	30.2	Human fetal astrocytes	Synaptosomes pHrodo red
Row 1264	LP01-302-5_0	SP190705_04	8390	5	16	Data	450	11.11	3.26	2019-07-09	STF-001107	STF-001107-1	3033741	30100384	134	34	10.08	73.5	-13	25.4	Human fetal astrocytes	Synaptosomes pHrodo red
Row 1265	LP01-302-5_0	SP190705_04	8390	5	17	Data	450	11.11	5.25	2019-07-09	STF-001028	STF-001028-1	4257446	34664836	141	38	12.28	89.6	-19.3	27	Human fetal astrocytes	Synaptosomes pHrodo red
Row 1266	LP01-302-5_0	SP190705_04	8390	5	18	Data	450	11.11	1.12	2019-07-09	STF-001108	STF-001108-1	3735800	30209196	132	34	12.37	90.2	-11.2	25.8	Human fetal astrocytes	Synaptosomes pHrodo red
Row 1267	LP01-302-5_0	SP190705_04	8390	5	19	Data	450	11.11	2.38	2019-07-09	STF-001029	STF-001029-1	3800608	29345052	127	38	12.95	94.5	-6.7	29.9	Human fetal astrocytes	Synaptosomes pHrodo red
Row 1268	LP01-302-5_0	SP190705_04	8390	5	20	Data	450	11.11	2.11	2019-07-09	STF-001109	STF-001109-1	5179401	30404260	128	48	17.04	124.3	-7.6	37.5	Human fetal astrocytes	Synaptosomes pHrodo red
Row 1269	LP01-302-5_0	SP190705_04	8390	5	21	Data	450	11.11	4.27	2019-07-09	STF-001030	STF-001030-1	3413905	30992564	131	31	11.02	80.4	-10.3	23.7	Human fetal astrocytes	Synaptosomes pHrodo red
Row 1270	LP01-302-5_0	SP190705_04	8390	5	22	Data	450	11.11	3.59	2019-07-09	STF-001110	STF-001110-1	5024595	27784518	112	44	18.08	131.9	6.7	39.3	Human fetal astrocytes	Synaptosomes pHrodo red
Row 1271	LP01-302-5_0	SP190705_04	8390	5	23	Positive Control				2019-07-09			0	22072012	86	0	0	0	30	0	Human fetal astrocytes	None
Row 1272	LP01-302-5_0	SP190705_04	8390	5	24	Low Control				2019-07-09			194821	5005752	8	3	3.89	28.4	100	37.5	Human fetal astrocytes	Synaptosomes pHrodo red
Row 1273	LP01-302-5_0	SP190705_04	8390	6	1	High Control				2019-07-09			3079009	28441918	123	36	10.83	79	-3.1	29.3	Human fetal astrocytes	Synaptosomes pHrodo red
Row 1274	LP01-302-5_0	SP190705_04	8390	6	2	High Control				2019-07-09			4031822	26435010	105	42	15.25	111.3	13	40	Human fetal astrocytes	Synaptosomes pHrodo red
Row 1275	LP01-302-5_0	SP190705_04	8390	6	3	Data	450	11.11	2.68	2019-07-09	STF-001181	STF-001181-1	4991597	28550852	119	51	17.48	127.6	0.4	42.9	Human fetal astrocytes	Synaptosomes pHrodo red
Row 1276	LP01-302-5_0	SP190705_04	8390	6	4	Data	450	11.11	4.34	2019-07-09	STF-080497	STF-080497-2	6246270	34555972	142	62	18.08	131.9	-20.2	43.7	Human fetal astrocytes	Synaptosomes pHrodo red
Row 1277	LP01-302-5_0	SP190705_04	8390	6	5	Data	450	11.11	1.53	2019-07-09	STF-001182	STF-001182-1	4692426	28859960	116	41	16.26	118.6	3.1	35.3	Human fetal astrocytes	Synaptosomes pHrodo red
Row 1278	LP01-302-5_0	SP190705_04	8390	6	6	Data	450	11.11	5.49	2019-07-09	STF-001260	STF-001260-1	5580651	29846536	127	52	18.7	136.4	-6.7	40.9	Human fetal astrocytes	Synaptosomes pHrodo red
Row 1279	LP01-302-5_0	SP190705_04	8390	6	7	Data	450	11.11	2.77	2019-07-09	STF-001183	STF-001183-1	3085146	30827006	111	27	10.01	73	7.6	24.3	Human fetal astrocytes	Synaptosomes pHrodo red
Row 1280	LP01-302-5_0	SP190705_04	8390	6	8	Data	450	11.11	1.7	2019-07-09	STF-001261	STF-001261-1	5158709	34197628	153	54	15.08	110.1	-30	35.3	Human fetal astrocytes	Synaptosomes pHrodo red
Row 1281	LP01-302-5_0	SP190705_04	8390	6	9	Data	450	11.11	4.78	2019-07-09	STF-001184	STF-001184-1	4571258	29866284	123	47	15.31	111.7	-3.1	38.2	Human fetal astrocytes	Synaptosomes pHrodo red
Row 1282	LP01-302-5_0	SP190705_04	8390	6	10	Data	450	11.11	4.34	2019-07-09	STF-001262	STF-001262-1	4109144	29739392	127	45	13.82	100.8	-6.7	35.4	Human fetal astrocytes	Synaptosomes pHrodo red
Row 1283	LP01-302-5_0	SP190705_04	8390	6	11	Data	450	11.11	4.93	2019-07-09	STF-001185	STF-001185-1	4275048	29204804	129	43	14.64	106.8	-8.5	33.3	Human fetal astrocytes	Synaptosomes pHrodo red
Row 1284	LP01-302-5_0	SP190705_04	8390	6	12	Data	450	11.11	6.65	2019-07-09	STF-001263	STF-001263-1	4747489	29793496	133	48	15.93	116.3	-12.1	36.1	Human fetal astrocytes	Synaptosomes pHrodo red
Row 1285	LP01-302-5_0	SP190705_04	8390	6	13	Data	450	11.11	3.96	2019-07-09	STF-001186	STF-001186-1	4177006	36305836	149	40	11.51	83.9	-26.5	26.8	Human fetal astrocytes	Synaptosomes pHrodo red
Row 1286	LP01-302-5_0	SP190705_04	8390	6	14	Data	450	11.11	5.48	2019-07-09	STF-001264	STF-001264-1	4168258	29500886	127	38	14.13	103.1	-6.7	29.9	Human fetal astrocytes	Synaptosomes pHrodo red
Row 1287	LP01-302-5_0	SP190705_04	8390	6	15	Data	450	11.11	4.42	2019-07-09	STF-001187	STF-001187-1	3177105	30816072	140	32	10.31	75.2	-18.4	22.9	Human fetal astrocytes	Synaptosomes pHrodo red
Row 1288	LP01-302-5_0	SP190705_04	8390	6	16	Data	450	11.11	1.13	2019-07-09	STF-001265	STF-001265-1	4670709	31658608	131	45	14.75	107.6	-10.3	34.4	Human fetal astrocytes	Synaptosomes pHrodo red
Row 1289	LP01-302-5_0	SP190705_04	8390	6	17	Data	450	11.11	2.38	2019-07-09	STF-001188	STF-001188-1	5645943	30641016	139	57	18.43	134.4	-17.5	41	Human fetal astrocytes	Synaptosomes pHrodo red
Row 1290	LP01-302-5_0	SP190705_04	8390	6	18	Data	450	11.11	2.96	2019-07-09	STF-001266	STF-001266-1	4737528	30589736	131	49	15.49	113	-10.3	37.4	Human fetal astrocytes	Synaptosomes pHrodo red
Row 1291	LP01-302-5_0	SP190705_04	8390	6	19	Data	450	11.11	4.18	2019-07-09	STF-001189	STF-001189-1	4543001	31028190	126	42	14.64	106.8	-5.8	33.3	Human fetal astrocytes	Synaptosomes pHrodo red
Row 1292	LP01-302-5_0	SP190705_04	8390	6	20	Data	450	11.11	3.16	2019-07-09	STF-001267	STF-001267-1	2502565	28160352	112	22	8.89	64.8	6.7	19.6	Human fetal astrocytes	Synaptosomes pHrodo red
Row 1293	LP01-302-5_0	SP190705_04	8390	6	21	Data	450	11.11	7.86	2019-07-09	STF-001190	STF-001190-1	4265628	30243888	141	49	14.1	102.9	-19.3	34.8	Human fetal astrocytes	Synaptosomes pHrodo red
Row 1294	LP01-302-5_0	SP190705_04	8390	6	22	Data	450	11.11	1.78	2019-07-09	STF-001268	STF-001268-1	5422707	32445710	137	54	16.71	121.9	-15.7	39.4	Human fetal astrocytes	Synaptosomes pHrodo red
Row 1295	LP01-302-5_0	SP190705_04	8390	6	23	Positive Control				2019-07-09			0	20929626	69	0	0	0	45.3	0	Human fetal astrocytes	None
Row 1296	LP01-302-5_0	SP190705_04	8390	6	24	Low Control				2019-07-09			156165	4735296	8	3	3.3	24.1	100	37.5	Human fetal astrocytes	Synaptosomes pHrodo red
Row 1297	LP01-302-5_0	SP190705_04	8390	7	1	High Control				2019-07-09			3540643	31822120	134	40	11.13	81.2	-13	29.9	Human fetal astrocytes	Synaptosomes pHrodo red
Row 1298	LP01-302-5_0	SP190705_04	8390	7	2	High Control				2019-07-09			2979239	26986960	120	33	11.04	80.5	-0.4	27.5	Human fetal astrocytes	Synaptosomes pHrodo red
Row 1299	LP01-302-5_0	SP190705_04	8390	7	3	Data	450	11.11	1.71	2019-07-09	STF-001031	STF-001031-1	4248120	32768396	131	45	12.96	94.6	-10.3	34.4	Human fetal astrocytes	Synaptosomes pHrodo red
Row 1300	LP01-302-5_0	SP190705_04	8390	7	4	Data	450	11.11	2.96	2019-07-09	STF-001111	STF-001111-1	3987408	25594060	107	41	15.58	113.7	11.2	38.3	Human fetal astrocytes	Synaptosomes pHrodo red
Row 1301	LP01-302-5_0	SP190705_04	8390	7	5	Data	450	11.11	1.05	2019-07-09	STF-001032	STF-001032-1	3527634	28750456	123	37	12.27	89.5	-3.1	30.1	Human fetal astrocytes	Synaptosomes pHrodo red
Row 1302	LP01-302-5_0	SP190705_04	8390	7	6	Data	450	11.11	3.49	2019-07-09	STF-001112	STF-001112-1	2751275	27505886	125	33	10	73	-4.9	26.4	Human fetal astrocytes	Synaptosomes pHrodo red
Row 1303	LP01-302-5_0	SP190705_04	8390	7	7	Data	450	11.11	3.13	2019-07-09	STF-001033	STF-001033-1	4331960	28945208	125	41	14.97	109.2	-4.9	32.8	Human fetal astrocytes	Synaptosomes pHrodo red
Row 1304	LP01-302-5_0	SP190705_04	8390	7	8	Data	450	11.11	6.29	2019-07-09	STF-001113	STF-001113-1	4548741	32809814	125	41	13.86	101.2	-4.9	32.8	Human fetal astrocytes	Synaptosomes pHrodo red
Row 1305	LP01-302-5_0	SP190705_04	8390	7	9	Data	450	11.11	4.89	2019-07-09	STF-001034	STF-001034-1	5093858	29740892	129	52	17.13	125	-8.5	40.3	Human fetal astrocytes	Synaptosomes pHrodo red
Row 1306	LP01-302-5_0	SP190705_04	8390	7	10	Data	450	11.11	3.18	2019-07-09	STF-001114	STF-001114-1	3399445	28289674	127	31	12.02	87.7	-6.7	24.4	Human fetal astrocytes	Synaptosomes pHrodo red
Row 1307	LP01-302-5_0	SP190705_04	8390	7	11	Data	450	11.11	2.71	2019-07-09	STF-001035	STF-001035-1	5848406	34099428	149	58	17.15	125.1	-26.5	38.9	Human fetal astrocytes	Synaptosomes pHrodo red
Row 1308	LP01-302-5_0	SP190705_04	8390	7	12	Data	450	11.11	2.44	2019-07-09	STF-001115	STF-001115-1	3904299	33192852	155	44	11.76	85.8	-31.8	28.4	Human fetal astrocytes	Synaptosomes pHrodo red
Row 1309	LP01-302-5_0	SP190705_04	8390	7	13	Data	450	11.11	2.61	2019-07-09	STF-001036	STF-001036-1	3368215	28250580	135	37	11.92	87	-13.9	27.4	Human fetal astrocytes	Synaptosomes pHrodo red
Row 1310	LP01-302-5_0	SP190705_04	8390	7	14	Data	450	11.11	3.49	2019-07-09	STF-001116	STF-001116-1	3412987	28287556	117	29	12.07	88	2.2	24.8	Human fetal astrocytes	Synaptosomes pHrodo red
Row 1311	LP01-302-5_0	SP190705_04	8390	7	15	Data	450	11.11	2.5	2019-07-09	STF-001037	STF-001037-1	3590590	29111924	129	34	12.33	90	-8.5	26.4	Human fetal astrocytes	Synaptosomes pHrodo red
Row 1312	LP01-302-5_0	SP190705_04	8390	7	16	Data	450	11.11	2	2019-07-09	STF-001117	STF-001117-1	4690708	34163336	146	45	13.73	100.2	-23.8	30.8	Human fetal astrocytes	Synaptosomes pHrodo red
Row 1313	LP01-302-5_0	SP190705_04	8390	7	17	Data	450	11.11	2	2019-07-09	STF-001038	STF-001038-1	3945780	31017588	137	44	12.72	92.8	-15.7	32.1	Human fetal astrocytes	Synaptosomes pHrodo red
Row 1314	LP01-302-5_0	SP190705_04	8390	7	18	Data	450	11.11	4.29	2019-07-09	STF-001118	STF-001118-1	5683422	35106044	152	60	16.19	118.1	-29.1	39.5	Human fetal astrocytes	Synaptosomes pHrodo red
Row 1315	LP01-302-5_0	SP190705_04	8390	7	19	Data	450	11.11	2.47	2019-07-09	STF-001039	STF-001039-1	5534372	31234004	132	53	17.72	129.3	-11.2	40.2	Human fetal astrocytes	Synaptosomes pHrodo red
Row 1316	LP01-302-5_0	SP190705_04	8390	7	20	Data	450	11.11	2.46	2019-07-09	STF-001119	STF-001119-1	3334358	30064512	128	32	11.09	80.9	-7.6	25	Human fetal astrocytes	Synaptosomes pHrodo red
Row 1317	LP01-302-5_0	SP190705_04	8390	7	21	Data	450	11.11	4.87	2019-07-09	STF-001040	STF-001040-1	4148497	30525338	125	39	13.59	99.2	-4.9	31.2	Human fetal astrocytes	Synaptosomes pHrodo red
Row 1318	LP01-302-5_0	SP190705_04	8390	7	22	Data	450	11.11	1.2	2019-07-09	STF-001120	STF-001120-1	3116990	27260808	124	34	11.43	83.4	-4	27.4	Human fetal astrocytes	Synaptosomes pHrodo red
Row 1319	LP01-302-5_0	SP190705_04	8390	7	23	Positive Control				2019-07-09			0	19126168	76	0	0	0	39	0	Human fetal astrocytes	None
Row 1320	LP01-302-5_0	SP190705_04	8390	7	24	Low Control				2019-07-09			77011	5431601	7	1	1.42	10.3	100.9	14.3	Human fetal astrocytes	Synaptosomes pHrodo red
Row 1321	LP01-302-5_0	SP190705_04	8390	8	1	High Control				2019-07-09			3301860	28804096	124	37	11.46	83.6	-4	29.8	Human fetal astrocytes	Synaptosomes pHrodo red
Row 1322	LP01-302-5_0	SP190705_04	8390	8	2	High Control				2019-07-09			3317852	26750240	125	38	12.4	90.5	-4.9	30.4	Human fetal astrocytes	Synaptosomes pHrodo red
Row 1323	LP01-302-5_0	SP190705_04	8390	8	3	Data	450	11.11	1.53	2019-07-09	STF-001191	STF-001191-1	3739101	28301686	120	37	13.21	96.4	-0.4	30.8	Human fetal astrocytes	Synaptosomes pHrodo red
Row 1324	LP01-302-5_0	SP190705_04	8390	8	4	Data	450	11.11	4.47	2019-07-09	STF-001269	STF-001269-1	3742962	32561408	134	38	11.5	83.9	-13	28.4	Human fetal astrocytes	Synaptosomes pHrodo red
Row 1325	LP01-302-5_0	SP190705_04	8390	8	5	Data	450	11.11	3.56	2019-07-09	STF-001192	STF-001192-1	3378624	30306030	132	36	11.15	81.3	-11.2	27.3	Human fetal astrocytes	Synaptosomes pHrodo red
Row 1326	LP01-302-5_0	SP190705_04	8390	8	6	Data	450	11.11	7.64	2019-07-09	STF-001270	STF-001270-1	3036735	29521460	123	29	10.29	75.1	-3.1	23.6	Human fetal astrocytes	Synaptosomes pHrodo red
Row 1327	LP01-302-5_0	SP190705_04	8390	8	7	Data	450	11.11	3.82	2019-07-09	STF-001193	STF-001193-1	4226439	29228232	115	40	14.46	105.5	4	34.8	Human fetal astrocytes	Synaptosomes pHrodo red
Row 1328	LP01-302-5_0	SP190705_04	8390	8	8	Data	450	11.11	3.33	2019-07-09	STF-001271	STF-001271-1	5199117	29555722	132	51	17.59	128.4	-11.2	38.6	Human fetal astrocytes	Synaptosomes pHrodo red
Row 1329	LP01-302-5_0	SP190705_04	8390	8	9	Data	450	11.11	4.48	2019-07-09	STF-001194	STF-001194-1	4353385	30394242	135	39	14.32	104.5	-13.9	28.9	Human fetal astrocytes	Synaptosomes pHrodo red
Row 1330	LP01-302-5_0	SP190705_04	8390	8	10	Data	450	11.11	5.29	2019-07-09	STF-001272	STF-001272-1	4426168	31189500	130	43	14.19	103.5	-9.4	33.1	Human fetal astrocytes	Synaptosomes pHrodo red
Row 1331	LP01-302-5_0	SP190705_04	8390	8	11	Data	450	11.11	4.54	2019-07-09	STF-001195	STF-001195-1	4345806	28988352	127	47	14.99	109.4	-6.7	37	Human fetal astrocytes	Synaptosomes pHrodo red
Row 1332	LP01-302-5_0	SP190705_04	8390	8	12	Data	450	11.11	3.97	2019-07-09	STF-001273	STF-001273-1	4835554	30194748	128	53	16.01	116.8	-7.6	41.4	Human fetal astrocytes	Synaptosomes pHrodo red
Row 1333	LP01-302-5_0	SP190705_04	8390	8	13	Data	450	11.11	3.39	2019-07-09	STF-001196	STF-001196-1	5252885	33443228	147	51	15.71	114.6	-24.7	34.7	Human fetal astrocytes	Synaptosomes pHrodo red
Row 1334	LP01-302-5_0	SP190705_04	8390	8	14	Data	450	11.11	3.63	2019-07-09	STF-001274	STF-001274-1	4176332	30900168	126	35	13.52	98.6	-5.8	27.8	Human fetal astrocytes	Synaptosomes pHrodo red
Row 1335	LP01-302-5_0	SP190705_04	8390	8	15	Data	450	11.11	4.29	2019-07-09	STF-001197	STF-001197-1	4632008	34426656	147	45	13.45	98.2	-24.7	30.6	Human fetal astrocytes	Synaptosomes pHrodo red
Row 1336	LP01-302-5_0	SP190705_04	8390	8	16	Data	450	11.11	3.52	2019-07-09	STF-001275	STF-001275-1	3944972	30524204	148	41	12.92	94.3	-25.6	27.7	Human fetal astrocytes	Synaptosomes pHrodo red
Row 1337	LP01-302-5_0	SP190705_04	8390	8	17	Data	450	11.11	3.92	2019-07-09	STF-001198	STF-001198-1	4162798	29533808	131	40	14.1	102.8	-10.3	30.5	Human fetal astrocytes	Synaptosomes pHrodo red
Row 1338	LP01-302-5_0	SP190705_04	8390	8	18	Data	450	11.11	5.31	2019-07-09	STF-001276	STF-001276-1	4191100	33929028	145	41	12.35	90.1	-22.9	28.3	Human fetal astrocytes	Synaptosomes pHrodo red
Row 1339	LP01-302-5_0	SP190705_04	8390	8	19	Data	450	11.11	1.13	2019-07-09	STF-001199	STF-001199-1	4129443	31598360	136	41	13.07	95.4	-14.8	30.1	Human fetal astrocytes	Synaptosomes pHrodo red
Row 1340	LP01-302-5_0	SP190705_04	8390	8	20	Data	450	11.11	4.95	2019-07-09	STF-001277	STF-001277-1	4277922	32522608	140	41	13.15	96	-18.4	29.3	Human fetal astrocytes	Synaptosomes pHrodo red
Row 1341	LP01-302-5_0	SP190705_04	8390	8	21	Data	450	11.11	2.8	2019-07-09	STF-001200	STF-001200-1	4164382	31245908	129	39	13.33	97.2	-8.5	30.2	Human fetal astrocytes	Synaptosomes pHrodo red
Row 1342	LP01-302-5_0	SP190705_04	8390	8	22	Data	450	11.11	1.22	2019-07-09	STF-001278	STF-001278-1	4032156	32794516	140	38	12.3	89.7	-18.4	27.1	Human fetal astrocytes	Synaptosomes pHrodo red
Row 1343	LP01-302-5_0	SP190705_04	8390	8	23	Positive Control				2019-07-09			0	20610632	82	0	0	0	33.6	0	Human fetal astrocytes	None
Row 1344	LP01-302-5_0	SP190705_04	8390	8	24	Low Control				2019-07-09			57597	12281817	15	1	0.47	3.4	93.7	6.7	Human fetal astrocytes	Synaptosomes pHrodo red
Row 1345	LP01-302-5_0	SP190705_04	8390	9	1	High Control				2019-07-09			3970030	28573910	121	43	13.89	101.4	-1.3	35.5	Human fetal astrocytes	Synaptosomes pHrodo red
Row 1346	LP01-302-5_0	SP190705_04	8390	9	2	High Control				2019-07-09			2786436	25078364	119	34	11.11	81.1	0.4	28.6	Human fetal astrocytes	Synaptosomes pHrodo red
Row 1347	LP01-302-5_0	SP190705_04	8390	9	3	Data	450	11.11	1.44	2019-07-09	STF-001041	STF-001041-1	3581432	25704216	116	41	13.93	101.7	3.1	35.3	Human fetal astrocytes	Synaptosomes pHrodo red
Row 1348	LP01-302-5_0	SP190705_04	8390	9	4	Data	450	11.11	2.96	2019-07-09	STF-001121	STF-001121-1	3525441	26736164	128	42	13.19	96.2	-7.6	32.8	Human fetal astrocytes	Synaptosomes pHrodo red
Row 1349	LP01-302-5_0	SP190705_04	8390	9	5	Data	450	11.11	7.52	2019-07-09	STF-001042	STF-001042-1	5595271	33074492	137	55	16.92	123.4	-15.7	40.1	Human fetal astrocytes	Synaptosomes pHrodo red
Row 1350	LP01-302-5_0	SP190705_04	8390	9	6	Data	450	11.11	7.58	2019-07-09	STF-001122	STF-001122-1	1283419	20598096	92	11	6.23	45.5	24.7	12	Human fetal astrocytes	Synaptosomes pHrodo red
Row 1351	LP01-302-5_0	SP190705_04	8390	9	7	Data	450	11.11	1.51	2019-07-09	STF-001043	STF-001043-1	5462817	32761728	133	51	16.67	121.7	-12.1	38.3	Human fetal astrocytes	Synaptosomes pHrodo red
Row 1352	LP01-302-5_0	SP190705_04	8390	9	8	Data	450	11.11	2.97	2019-07-09	STF-001123	STF-001123-1	4471023	29733618	125	43	15.04	109.7	-4.9	34.4	Human fetal astrocytes	Synaptosomes pHrodo red
Row 1353	LP01-302-5_0	SP190705_04	8390	9	9	Data	450	11.11	2.43	2019-07-09	STF-001044	STF-001044-1	3804048	27489766	122	41	13.84	101	-2.2	33.6	Human fetal astrocytes	Synaptosomes pHrodo red
Row 1354	LP01-302-5_0	SP190705_04	8390	9	10	Data	450	11.11	2.58	2019-07-09	STF-001124	STF-001124-1	5092053	33784232	145	55	15.07	110	-22.9	37.9	Human fetal astrocytes	Synaptosomes pHrodo red
Row 1355	LP01-302-5_0	SP190705_04	8390	9	11	Data	450	11.11	3.33	2019-07-09	STF-001045	STF-001045-1	3427916	28666994	133	37	11.96	87.2	-12.1	27.8	Human fetal astrocytes	Synaptosomes pHrodo red
Row 1356	LP01-302-5_0	SP190705_04	8390	9	12	Data	450	11.11	3.16	2019-07-09	STF-001125	STF-001125-1	4231335	28348430	130	42	14.93	108.9	-9.4	32.3	Human fetal astrocytes	Synaptosomes pHrodo red
Row 1357	LP01-302-5_0	SP190705_04	8390	9	13	Data	450	11.11	4.47	2019-07-09	STF-001046	STF-001046-1	4230609	29541974	132	45	14.32	104.5	-11.2	34.1	Human fetal astrocytes	Synaptosomes pHrodo red
Row 1358	LP01-302-5_0	SP190705_04	8390	9	14	Data	450	11.11	3.58	2019-07-09	STF-001126	STF-001126-1	2808368	27980912	132	28	10.04	73.2	-11.2	21.2	Human fetal astrocytes	Synaptosomes pHrodo red
Row 1359	LP01-302-5_0	SP190705_04	8390	9	15	Data	450	11.11	3.8	2019-07-09	STF-001047	STF-001047-1	3077280	29233060	126	27	10.53	76.8	-5.8	21.4	Human fetal astrocytes	Synaptosomes pHrodo red
Row 1360	LP01-302-5_0	SP190705_04	8390	9	16	Data	450	11.11	3.25	2019-07-09	STF-001127	STF-001127-1	3467269	24928248	117	37	13.91	101.5	2.2	31.6	Human fetal astrocytes	Synaptosomes pHrodo red
Row 1361	LP01-302-5_0	SP190705_04	8390	9	17	Data	450	11.11	3.33	2019-07-09	STF-001048	STF-001048-1	2899285	29092828	131	30	9.97	72.7	-10.3	22.9	Human fetal astrocytes	Synaptosomes pHrodo red
Row 1362	LP01-302-5_0	SP190705_04	8390	9	18	Data	450	11.11	2.65	2019-07-09	STF-001128	STF-001128-1	3069889	29554300	136	37	10.39	75.8	-14.8	27.2	Human fetal astrocytes	Synaptosomes pHrodo red
Row 1363	LP01-302-5_0	SP190705_04	8390	9	19	Data	450	11.11	2.62	2019-07-09	STF-001049	STF-001049-1	3825048	31435688	137	34	12.17	88.8	-15.7	24.8	Human fetal astrocytes	Synaptosomes pHrodo red
Row 1364	LP01-302-5_0	SP190705_04	8390	9	20	Data	450	11.11	4.07	2019-07-09	STF-001129	STF-001129-1	4567196	34307876	140	42	13.31	97.1	-18.4	30	Human fetal astrocytes	Synaptosomes pHrodo red
Row 1365	LP01-302-5_0	SP190705_04	8390	9	21	Data	450	11.11	2.74	2019-07-09	STF-001050	STF-001050-1	3650494	28204056	130	32	12.94	94.4	-9.4	24.6	Human fetal astrocytes	Synaptosomes pHrodo red
Row 1366	LP01-302-5_0	SP190705_04	8390	9	22	Data	450	11.11	4.96	2019-07-09	STF-001130	STF-001130-1	5111055	32149020	149	50	15.9	116	-26.5	33.6	Human fetal astrocytes	Synaptosomes pHrodo red
Row 1367	LP01-302-5_0	SP190705_04	8390	9	23	Positive Control				2019-07-09			0	23901932	91	0	0	0	25.6	0	Human fetal astrocytes	None
Row 1368	LP01-302-5_0	SP190705_04	8390	9	24	Low Control				2019-07-09			105889	16932496	18	2	0.63	4.6	91	11.1	Human fetal astrocytes	Synaptosomes pHrodo red
Row 1369	LP01-302-5_0	SP190705_04	8390	10	1	High Control				2019-07-09			2927527	22553632	109	35	12.98	94.7	9.4	32.1	Human fetal astrocytes	Synaptosomes pHrodo red
Row 1370	LP01-302-5_0	SP190705_04	8390	10	2	High Control				2019-07-09			4011222	32882714	148	46	12.2	89	-25.6	31.1	Human fetal astrocytes	Synaptosomes pHrodo red
Row 1371	LP01-302-5_0	SP190705_04	8390	10	3	Data	450	11.11	4.84	2019-07-09	STF-001201	STF-001201-1	3257451	21626432	95	35	15.06	109.9	22	36.8	Human fetal astrocytes	Synaptosomes pHrodo red
Row 1372	LP01-302-5_0	SP190705_04	8390	10	4	Data	450	11.11	5.32	2019-07-09	STF-001279	STF-001279-1	4074245	29066824	124	44	14.02	102.3	-4	35.5	Human fetal astrocytes	Synaptosomes pHrodo red
Row 1373	LP01-302-5_0	SP190705_04	8390	10	5	Data	450	11.11	3.51	2019-07-09	STF-001202	STF-001202-1	3730505	31271204	137	38	11.93	87	-15.7	27.7	Human fetal astrocytes	Synaptosomes pHrodo red
Row 1374	LP01-302-5_0	SP190705_04	8390	10	6	Data	450	11.11	4.37	2019-07-09	STF-001280	STF-001280-1	3834005	30763104	138	38	12.46	90.9	-16.6	27.5	Human fetal astrocytes	Synaptosomes pHrodo red
Row 1375	LP01-302-5_0	SP190705_04	8390	10	7	Data	450	11.11	1.74	2019-07-09	STF-001203	STF-001203-1	4048550	26817600	120	38	15.1	110.2	-0.4	31.7	Human fetal astrocytes	Synaptosomes pHrodo red
Row 1376	LP01-302-5_0	SP190705_04	8390	10	8	Data	450	11.11	4.65	2019-07-09	STF-001281	STF-001281-1	5372914	30469724	132	52	17.63	128.7	-11.2	39.4	Human fetal astrocytes	Synaptosomes pHrodo red
Row 1377	LP01-302-5_0	SP190705_04	8390	10	9	Data	450	11.11	3.09	2019-07-09	STF-001204	STF-001204-1	3330756	23901126	107	33	13.94	101.7	11.2	30.8	Human fetal astrocytes	Synaptosomes pHrodo red
Row 1378	LP01-302-5_0	SP190705_04	8390	10	10	Data	450	11.11	4.03	2019-07-09	STF-078950	STF-078950-2	4216309	30478008	132	47	13.83	100.9	-11.2	35.6	Human fetal astrocytes	Synaptosomes pHrodo red
Row 1379	LP01-302-5_0	SP190705_04	8390	10	11	Data	450	11.11	2.48	2019-07-09	STF-001205	STF-001205-1	4161773	32394124	140	38	12.85	93.7	-18.4	27.1	Human fetal astrocytes	Synaptosomes pHrodo red
Row 1380	LP01-302-5_0	SP190705_04	8390	10	12	Data	450	11.11	1.96	2019-07-09	STF-001282	STF-001282-1	4982852	31653512	142	46	15.74	114.9	-20.2	32.4	Human fetal astrocytes	Synaptosomes pHrodo red
Row 1381	LP01-302-5_0	SP190705_04	8390	10	13	Data	450	11.11	5.09	2019-07-09	STF-001206	STF-001206-1	5096593	32331420	139	52	15.76	115	-17.5	37.4	Human fetal astrocytes	Synaptosomes pHrodo red
Row 1382	LP01-302-5_0	SP190705_04	8390	10	14	Data	450	11.11	2.22	2019-07-09	STF-001283	STF-001283-1	4844725	31756580	142	45	15.26	111.3	-20.2	31.7	Human fetal astrocytes	Synaptosomes pHrodo red
Row 1383	LP01-302-5_0	SP190705_04	8390	10	15	Data	450	11.11	3.85	2019-07-09	STF-001207	STF-001207-1	4370760	29722620	136	48	14.71	107.3	-14.8	35.3	Human fetal astrocytes	Synaptosomes pHrodo red
Row 1384	LP01-302-5_0	SP190705_04	8390	10	16	Data	450	11.11	4.15	2019-07-09	STF-001284	STF-001284-1	3679072	27464810	126	34	13.4	97.7	-5.8	27	Human fetal astrocytes	Synaptosomes pHrodo red
Row 1385	LP01-302-5_0	SP190705_04	8390	10	17	Data	450	11.11	2	2019-07-09	STF-001208	STF-001208-1	3790679	29219524	136	36	12.97	94.7	-14.8	26.5	Human fetal astrocytes	Synaptosomes pHrodo red
Row 1386	LP01-302-5_0	SP190705_04	8390	10	18	Data	450	11.11	3.8	2019-07-09	STF-001285	STF-001285-1	4588586	31501566	135	45	14.57	106.3	-13.9	33.3	Human fetal astrocytes	Synaptosomes pHrodo red
Row 1387	LP01-302-5_0	SP190705_04	8390	10	19	Data	450	11.11	4.01	2019-07-09	STF-001209	STF-001209-1	3294200	26087230	113	28	12.63	92.1	5.8	24.8	Human fetal astrocytes	Synaptosomes pHrodo red
Row 1388	LP01-302-5_0	SP190705_04	8390	10	20	Data	450	11.11	3.88	2019-07-09	STF-001286	STF-001286-1	4081509	27278196	111	37	14.96	109.2	7.6	33.3	Human fetal astrocytes	Synaptosomes pHrodo red
Row 1389	LP01-302-5_0	SP190705_04	8390	10	21	Data	450	11.11	2.83	2019-07-09	STF-001210	STF-001210-1	4881274	32488768	129	45	15.02	109.6	-8.5	34.9	Human fetal astrocytes	Synaptosomes pHrodo red
Row 1390	LP01-302-5_0	SP190705_04	8390	10	22	Data	450	11.11	3.69	2019-07-09	STF-001287	STF-001287-1	917853	27974596	110	8	3.28	23.9	8.5	7.3	Human fetal astrocytes	Synaptosomes pHrodo red
Row 1391	LP01-302-5_0	SP190705_04	8390	10	23	Positive Control				2019-07-09			0	20999858	81	0	0	0	34.5	0	Human fetal astrocytes	None
Row 1392	LP01-302-5_0	SP190705_04	8390	10	24	Low Control				2019-07-09			74310	13865485	16	1	0.54	3.9	92.8	6.3	Human fetal astrocytes	Synaptosomes pHrodo red
Row 1393	LP01-302-5_0	SP190705_04	8390	11	1	High Control				2019-07-09			3478731	24727560	114	42	14.07	102.6	4.9	36.8	Human fetal astrocytes	Synaptosomes pHrodo red
Row 1394	LP01-302-5_0	SP190705_04	8390	11	2	High Control				2019-07-09			3290713	25325852	114	39	12.99	94.8	4.9	34.2	Human fetal astrocytes	Synaptosomes pHrodo red
Row 1395	LP01-302-5_0	SP190705_04	8390	11	3	Data	450	11.11	2.09	2019-07-09	STF-001051	STF-001051-1	3156603	24963232	115	30	12.65	92.3	4	26.1	Human fetal astrocytes	Synaptosomes pHrodo red
Row 1396	LP01-302-5_0	SP190705_04	8390	11	4	Data	450	11.11	3.25	2019-07-09	STF-001131	STF-001131-1	3680479	25083494	107	41	14.67	107.1	11.2	38.3	Human fetal astrocytes	Synaptosomes pHrodo red
Row 1397	LP01-302-5_0	SP190705_04	8390	11	5	Data	450	11.11	4.07	2019-07-09	STF-001052	STF-001052-1	3383383	25938288	114	36	13.04	95.2	4.9	31.6	Human fetal astrocytes	Synaptosomes pHrodo red
Row 1398	LP01-302-5_0	SP190705_04	8390	11	6	Data	450	11.11	2.66	2019-07-09	STF-001132	STF-001132-1	4607344	29890968	119	49	15.41	112.5	0.4	41.2	Human fetal astrocytes	Synaptosomes pHrodo red
Row 1399	LP01-302-5_0	SP190705_04	8390	11	7	Data	450	11.11	3.55	2019-07-09	STF-001053	STF-001053-1	3772956	26236928	111	41	14.38	104.9	7.6	36.9	Human fetal astrocytes	Synaptosomes pHrodo red
Row 1400	LP01-302-5_0	SP190705_04	8390	11	8	Data	450	11.11	1.48	2019-07-09	STF-001133	STF-001133-1	5168278	32277478	134	48	16.01	116.8	-13	35.8	Human fetal astrocytes	Synaptosomes pHrodo red
Row 1401	LP01-302-5_0	SP190705_04	8390	11	9	Data	450	11.11	4.69	2019-07-09	STF-001054	STF-001054-1	6188999	30049328	111	57	20.6	150.3	7.6	51.4	Human fetal astrocytes	Synaptosomes pHrodo red
Row 1402	LP01-302-5_0	SP190705_04	8390	11	10	Data	450	11.11	1.29	2019-07-09	STF-001134	STF-001134-1	3780585	26105252	124	39	14.48	105.7	-4	31.5	Human fetal astrocytes	Synaptosomes pHrodo red
Row 1403	LP01-302-5_0	SP190705_04	8390	11	11	Data	450	11.11	2.85	2019-07-09	STF-001055	STF-001055-1	4470454	27856522	125	48	16.05	117.1	-4.9	38.4	Human fetal astrocytes	Synaptosomes pHrodo red
Row 1404	LP01-302-5_0	SP190705_04	8390	11	12	Data	450	11.11	3.74	2019-07-09	STF-001135	STF-001135-1	4848532	30140504	124	46	16.09	117.4	-4	37.1	Human fetal astrocytes	Synaptosomes pHrodo red
Row 1405	LP01-302-5_0	SP190705_04	8390	11	13	Data	450	11.11	1.49	2019-07-09	STF-001056	STF-001056-1	2355322	22181776	111	28	10.62	77.5	7.6	25.2	Human fetal astrocytes	Synaptosomes pHrodo red
Row 1406	LP01-302-5_0	SP190705_04	8390	11	14	Data	450	11.11	2.89	2019-07-09	STF-001136	STF-001136-1	2908258	21900724	90	27	13.28	96.9	26.5	30	Human fetal astrocytes	Synaptosomes pHrodo red
Row 1407	LP01-302-5_0	SP190705_04	8390	11	15	Data	450	11.11	5.18	2019-07-09	STF-001057	STF-001057-1	3994721	31317796	137	37	12.76	93.1	-15.7	27	Human fetal astrocytes	Synaptosomes pHrodo red
Row 1408	LP01-302-5_0	SP190705_04	8390	11	16	Data	450	11.11	3.72	2019-07-09	STF-001137	STF-001137-1	5237428	38255296	144	48	13.69	99.9	-22	33.3	Human fetal astrocytes	Synaptosomes pHrodo red
Row 1409	LP01-302-5_0	SP190705_04	8390	11	17	Data	450	11.11	2.2	2019-07-09	STF-001058	STF-001058-1	4992331	32549242	143	53	15.34	111.9	-21.1	37.1	Human fetal astrocytes	Synaptosomes pHrodo red
Row 1410	LP01-302-5_0	SP190705_04	8390	11	18	Data	450	11.11	1.41	2019-07-09	STF-001138	STF-001138-1	3456689	27617300	129	38	12.52	91.3	-8.5	29.5	Human fetal astrocytes	Synaptosomes pHrodo red
Row 1411	LP01-302-5_0	SP190705_04	8390	11	19	Data	450	11.11	3.84	2019-07-09	STF-001059	STF-001059-1	2733817	24571492	114	28	11.13	81.2	4.9	24.6	Human fetal astrocytes	Synaptosomes pHrodo red
Row 1412	LP01-302-5_0	SP190705_04	8390	11	20	Data	450	11.11	2.54	2019-07-09	STF-001139	STF-001139-1	3918803	27309004	117	39	14.35	104.7	2.2	33.3	Human fetal astrocytes	Synaptosomes pHrodo red
Row 1413	LP01-302-5_0	SP190705_04	8390	11	21	Data	450	11.11	2.54	2019-07-09	STF-001060	STF-001060-1	3520510	29711982	129	33	11.85	86.5	-8.5	25.6	Human fetal astrocytes	Synaptosomes pHrodo red
Row 1414	LP01-302-5_0	SP190705_04	8390	11	22	Data	450	11.11	5.77	2019-07-09	STF-001140	STF-001140-1	2954375	36012684	157	27	8.2	59.9	-33.6	17.2	Human fetal astrocytes	Synaptosomes pHrodo red
Row 1415	LP01-302-5_0	SP190705_04	8390	11	23	Positive Control				2019-07-09			0	17501232	71	0	0	0	43.5	0	Human fetal astrocytes	None
Row 1416	LP01-302-5_0	SP190705_04	8390	11	24	Low Control				2019-07-09			0	110405176	10	0	0	0	98.2	0	Human fetal astrocytes	Synaptosomes pHrodo red
Row 1417	LP01-302-5_0	SP190705_04	8390	12	1	High Control				2019-07-09			4161156	29415248	118	41	14.15	103.2	1.3	34.7	Human fetal astrocytes	Synaptosomes pHrodo red
Row 1418	LP01-302-5_0	SP190705_04	8390	12	2	High Control				2019-07-09			3401120	26559230	128	40	12.81	93.4	-7.6	31.3	Human fetal astrocytes	Synaptosomes pHrodo red
Row 1419	LP01-302-5_0	SP190705_04	8390	12	3	Data	450	11.11	3.96	2019-07-09	STF-001211	STF-001211-1	3659012	31669318	126	34	11.55	84.3	-5.8	27	Human fetal astrocytes	Synaptosomes pHrodo red
Row 1420	LP01-302-5_0	SP190705_04	8390	12	4	Data	450	11.11	4.69	2019-07-09	STF-001288	STF-001288-1	935989	22514312	75	8	4.16	30.3	39.9	10.7	Human fetal astrocytes	Synaptosomes pHrodo red
Row 1421	LP01-302-5_0	SP190705_04	8390	12	5	Data	450	11.11	3.41	2019-07-09	STF-089963	STF-089963-2	4817990	34387260	148	47	14.01	102.2	-25.6	31.8	Human fetal astrocytes	Synaptosomes pHrodo red
Row 1422	LP01-302-5_0	SP190705_04	8390	12	6	Data	450	11.11	2.63	2019-07-09	STF-001289	STF-001289-1	4740800	27494050	114	46	17.24	125.8	4.9	40.4	Human fetal astrocytes	Synaptosomes pHrodo red
Row 1423	LP01-302-5_0	SP190705_04	8390	12	7	Data	450	11.11	4.36	2019-07-09	STF-001212	STF-001212-1	4670194	33223508	145	46	14.06	102.6	-22.9	31.7	Human fetal astrocytes	Synaptosomes pHrodo red
Row 1424	LP01-302-5_0	SP190705_04	8390	12	8	Data	450	11.11	2.8	2019-07-09	STF-001290	STF-001290-1	4705596	28479792	117	39	16.52	120.6	2.2	33.3	Human fetal astrocytes	Synaptosomes pHrodo red
Row 1425	LP01-302-5_0	SP190705_04	8390	12	9	Data	450	11.11	3.83	2019-07-09	STF-001213	STF-001213-1	4378983	32390536	142	44	13.52	98.6	-20.2	31	Human fetal astrocytes	Synaptosomes pHrodo red
Row 1426	LP01-302-5_0	SP190705_04	8390	12	10	Data	450	11.11	3.35	2019-07-09	STF-001291	STF-001291-1	4122918	23448720	105	42	17.58	128.3	13	40	Human fetal astrocytes	Synaptosomes pHrodo red
Row 1427	LP01-302-5_0	SP190705_04	8390	12	11	Data	450	11.11	5.35	2019-07-09	STF-001214	STF-001214-1	586916	17748490	80	9	3.31	24.1	35.4	11.3	Human fetal astrocytes	Synaptosomes pHrodo red
Row 1428	LP01-302-5_0	SP190705_04	8390	12	12	Data	450	11.11	5.18	2019-07-09	STF-001292	STF-001292-1	4269426	30397368	137	47	14.05	102.5	-15.7	34.3	Human fetal astrocytes	Synaptosomes pHrodo red
Row 1429	LP01-302-5_0	SP190705_04	8390	12	13	Data	450	11.11	5.06	2019-07-09	STF-001215	STF-001215-1	4104806	32431710	146	40	12.66	92.3	-23.8	27.4	Human fetal astrocytes	Synaptosomes pHrodo red
Row 1430	LP01-302-5_0	SP190705_04	8390	12	14	Data	450	11.11	5.73	2019-07-09	STF-001293	STF-001293-1	2376212	25448228	122	26	9.34	68.1	-2.2	21.3	Human fetal astrocytes	Synaptosomes pHrodo red
Row 1431	LP01-302-5_0	SP190705_04	8390	12	15	Data	450	11.11	3.59	2019-07-09	STF-001216	STF-001216-1	2855745	24971170	118	26	11.44	83.4	1.3	22	Human fetal astrocytes	Synaptosomes pHrodo red
Row 1432	LP01-302-5_0	SP190705_04	8390	12	16	Data	450	11.11	2.5	2019-07-09	STF-001294	STF-001294-1	3572390	27363200	124	40	13.06	95.3	-4	32.3	Human fetal astrocytes	Synaptosomes pHrodo red
Row 1433	LP01-302-5_0	SP190705_04	8390	12	17	Data	450	11.11	4.11	2019-07-09	STF-001217	STF-001217-1	5328630	32199464	132	49	16.55	120.7	-11.2	37.1	Human fetal astrocytes	Synaptosomes pHrodo red
Row 1434	LP01-302-5_0	SP190705_04	8390	12	18	Data	450	11.11	2.03	2019-07-09	STF-001295	STF-001295-1	4962795	31156992	138	48	15.93	116.2	-16.6	34.8	Human fetal astrocytes	Synaptosomes pHrodo red
Row 1435	LP01-302-5_0	SP190705_04	8390	12	19	Data	450	11.11	3.23	2019-07-09	STF-001218	STF-001218-1	4881211	32018694	142	52	15.24	111.2	-20.2	36.6	Human fetal astrocytes	Synaptosomes pHrodo red
Row 1436	LP01-302-5_0	SP190705_04	8390	12	20	Data	450	11.11	3.48	2019-07-09	STF-001296	STF-001296-1	4181588	26368524	107	38	15.86	115.7	11.2	35.5	Human fetal astrocytes	Synaptosomes pHrodo red
Row 1437	LP01-302-5_0	SP190705_04	8390	12	21	Data	450	11.11	3.85	2019-07-09	STF-001219	STF-001219-1	3630137	30190136	118	34	12.02	87.7	1.3	28.8	Human fetal astrocytes	Synaptosomes pHrodo red
Row 1438	LP01-302-5_0	SP190705_04	8390	12	22	Data	450	11.11	2.75	2019-07-09	STF-001297	STF-001297-1	4281933	33091548	135	41	12.94	94.4	-13.9	30.4	Human fetal astrocytes	Synaptosomes pHrodo red
Row 1439	LP01-302-5_0	SP190705_04	8390	12	23	Positive Control				2019-07-09			0	13527955	54	0	0	0	58.7	0	Human fetal astrocytes	None
Row 1440	LP01-302-5_0	SP190705_04	8390	12	24	Low Control				2019-07-09			234247	107860432	10	3	0.22	1.6	98.2	30	Human fetal astrocytes	Synaptosomes pHrodo red
Row 1441	LP01-302-5_0	SP190705_04	8390	13	1	High Control				2019-07-09			3902840	27149326	115	42	14.38	104.9	4	36.5	Human fetal astrocytes	Synaptosomes pHrodo red
Row 1442	LP01-302-5_0	SP190705_04	8390	13	2	High Control				2019-07-09			4972528	35629528	141	45	13.96	101.8	-19.3	31.9	Human fetal astrocytes	Synaptosomes pHrodo red
Row 1443	LP01-302-5_0	SP190705_04	8390	13	3	Data	450	11.11	2.19	2019-07-09	STF-001061	STF-001061-1	4024137	25973488	123	43	15.49	113	-3.1	35	Human fetal astrocytes	Synaptosomes pHrodo red
Row 1444	LP01-302-5_0	SP190705_04	8390	13	4	Data	450	11.11	1.28	2019-07-09	STF-001141	STF-001141-1	4793114	27554060	128	50	17.4	126.9	-7.6	39.1	Human fetal astrocytes	Synaptosomes pHrodo red
Row 1445	LP01-302-5_0	SP190705_04	8390	13	5	Data	450	11.11	3	2019-07-09	STF-001062	STF-001062-1	4714765	36660576	148	44	12.86	93.8	-25.6	29.7	Human fetal astrocytes	Synaptosomes pHrodo red
Row 1446	LP01-302-5_0	SP190705_04	8390	13	6	Data	450	11.11	2.91	2019-07-09	STF-001142	STF-001142-1	5033031	31073276	147	49	16.2	118.2	-24.7	33.3	Human fetal astrocytes	Synaptosomes pHrodo red
Row 1447	LP01-302-5_0	SP190705_04	8390	13	7	Data	450	11.11	2.36	2019-07-09	STF-001063	STF-001063-1	5676746	29642160	120	53	19.15	139.7	-0.4	44.2	Human fetal astrocytes	Synaptosomes pHrodo red
Row 1448	LP01-302-5_0	SP190705_04	8390	13	8	Data	450	11.11	6.63	2019-07-09	STF-001143	STF-001143-1	4381020	33577796	137	47	13.05	95.2	-15.7	34.3	Human fetal astrocytes	Synaptosomes pHrodo red
Row 1449	LP01-302-5_0	SP190705_04	8390	13	9	Data	450	11.11	2.03	2019-07-09	STF-001064	STF-001064-1	5369192	29595924	132	52	18.14	132.4	-11.2	39.4	Human fetal astrocytes	Synaptosomes pHrodo red
Row 1450	LP01-302-5_0	SP190705_04	8390	13	10	Data	450	11.11	3.23	2019-07-09	STF-001144	STF-001144-1	4097460	27847364	127	42	14.71	107.4	-6.7	33.1	Human fetal astrocytes	Synaptosomes pHrodo red
Row 1451	LP01-302-5_0	SP190705_04	8390	13	11	Data	450	11.11	3	2019-07-09	STF-001065	STF-001065-1	2445265	35521020	151	22	6.88	50.2	-28.3	14.6	Human fetal astrocytes	Synaptosomes pHrodo red
Row 1452	LP01-302-5_0	SP190705_04	8390	13	12	Data	450	11.11	4.36	2019-07-09	STF-001145	STF-001145-1	3946467	24976556	118	42	15.8	115.3	1.3	35.6	Human fetal astrocytes	Synaptosomes pHrodo red
Row 1453	LP01-302-5_0	SP190705_04	8390	13	13	Data	450	11.11	1.79	2019-07-09	STF-001066	STF-001066-1	3859570	26908776	125	41	14.34	104.7	-4.9	32.8	Human fetal astrocytes	Synaptosomes pHrodo red
Row 1454	LP01-302-5_0	SP190705_04	8390	13	14	Data	450	11.11	2.96	2019-07-09	STF-001146	STF-001146-1	4689404	33674768	132	45	13.93	101.6	-11.2	34.1	Human fetal astrocytes	Synaptosomes pHrodo red
Row 1455	LP01-302-5_0	SP190705_04	8390	13	15	Data	450	11.11	1.88	2019-07-09	STF-001067	STF-001067-1	4909280	31926178	143	49	15.38	112.2	-21.1	34.3	Human fetal astrocytes	Synaptosomes pHrodo red
Row 1456	LP01-302-5_0	SP190705_04	8390	13	16	Data	450	11.11	3.39	2019-07-09	STF-001147	STF-001147-1	3947214	29121374	118	35	13.55	98.9	1.3	29.7	Human fetal astrocytes	Synaptosomes pHrodo red
Row 1457	LP01-302-5_0	SP190705_04	8390	13	17	Data	450	11.11	3.36	2019-07-09	STF-001068	STF-001068-1	2845179	27119340	127	27	10.49	76.5	-6.7	21.3	Human fetal astrocytes	Synaptosomes pHrodo red
Row 1458	LP01-302-5_0	SP190705_04	8390	13	18	Data	450	11.11	4.44	2019-07-09	STF-001148	STF-001148-1	3419356	25861496	125	37	13.22	96.5	-4.9	29.6	Human fetal astrocytes	Synaptosomes pHrodo red
Row 1459	LP01-302-5_0	SP190705_04	8390	13	19	Data	450	11.11	4.19	2019-07-09	STF-001069	STF-001069-1	4406662	38219288	158	42	11.53	84.1	-34.5	26.6	Human fetal astrocytes	Synaptosomes pHrodo red
Row 1460	LP01-302-5_0	SP190705_04	8390	13	20	Data	450	11.11	8.72	2019-07-09	STF-001149	STF-001149-1	4141118	25008044	114	39	16.56	120.8	4.9	34.2	Human fetal astrocytes	Synaptosomes pHrodo red
Row 1461	LP01-302-5_0	SP190705_04	8390	13	21	Data	450	11.11	2.31	2019-07-09	STF-001070	STF-001070-1	5180188	30576252	134	48	16.94	123.6	-13	35.8	Human fetal astrocytes	Synaptosomes pHrodo red
Row 1462	LP01-302-5_0	SP190705_04	8390	13	22	Data	450	11.11	3.52	2019-07-09	STF-001150	STF-001150-1	4984604	36037048	131	40	13.83	100.9	-10.3	30.5	Human fetal astrocytes	Synaptosomes pHrodo red
Row 1463	LP01-302-5_0	SP190705_04	8390	13	23	Positive Control				2019-07-09			0	20080112	79	0	0	0	36.3	0	Human fetal astrocytes	None
Row 1464	LP01-302-5_0	SP190705_04	8390	13	24	Low Control				2019-07-09			0	632062	2	0	0	0	105.4	0	Human fetal astrocytes	Synaptosomes pHrodo red
Row 1465	LP01-302-5_0	SP190705_04	8390	14	1	High Control				2019-07-09			5712087	37782456	130	52	15.12	110.3	-9.4	40	Human fetal astrocytes	Synaptosomes pHrodo red
Row 1466	LP01-302-5_0	SP190705_04	8390	14	2	High Control				2019-07-09			3634600	24856372	114	41	14.62	106.7	4.9	36	Human fetal astrocytes	Synaptosomes pHrodo red
Row 1467	LP01-302-5_0	SP190705_04	8390	14	3	Data	450	11.11	2.47	2019-07-09	STF-001220	STF-001220-1	5171680	27439148	122	54	18.85	137.5	-2.2	44.3	Human fetal astrocytes	Synaptosomes pHrodo red
Row 1468	LP01-302-5_0	SP190705_04	8390	14	4	Data	450	11.11	4.63	2019-07-09	STF-001298	STF-001298-1	4189731	32418766	139	42	12.92	94.3	-17.5	30.2	Human fetal astrocytes	Synaptosomes pHrodo red
Row 1469	LP01-302-5_0	SP190705_04	8390	14	5	Data	450	11.11	4.48	2019-07-09	STF-001221	STF-001221-1	3405928	25129280	118	38	13.55	98.9	1.3	32.2	Human fetal astrocytes	Synaptosomes pHrodo red
Row 1470	LP01-302-5_0	SP190705_04	8390	14	6	Data	450	11.11	2.41	2019-07-09	STF-001299	STF-001299-1	4037112	29632128	129	37	13.62	99.4	-8.5	28.7	Human fetal astrocytes	Synaptosomes pHrodo red
Row 1471	LP01-302-5_0	SP190705_04	8390	14	7	Data	450	11.11	4.69	2019-07-09	STF-001222	STF-001222-1	3958324	31187240	116	36	12.69	92.6	3.1	31	Human fetal astrocytes	Synaptosomes pHrodo red
Row 1472	LP01-302-5_0	SP190705_04	8390	14	8	Data	450	11.11	3.47	2019-07-09	STF-001300	STF-001300-1	2856652	24896016	113	33	11.47	83.7	5.8	29.2	Human fetal astrocytes	Synaptosomes pHrodo red
Row 1473	LP01-302-5_0	SP190705_04	8390	14	9	Data	450	11.11	4.6	2019-07-09	STF-001223	STF-001223-1	3823449	29311324	141	40	13.04	95.2	-19.3	28.4	Human fetal astrocytes	Synaptosomes pHrodo red
Row 1474	LP01-302-5_0	SP190705_04	8390	14	10	Data	450	11.11	2.19	2019-07-09	STF-001301	STF-001301-1	4139776	34613488	135	39	11.96	87.3	-13.9	28.9	Human fetal astrocytes	Synaptosomes pHrodo red
Row 1475	LP01-302-5_0	SP190705_04	8390	14	11	Data	450	11.11	4.42	2019-07-09	STF-001224	STF-001224-1	3196885	30321094	132	35	10.54	76.9	-11.2	26.5	Human fetal astrocytes	Synaptosomes pHrodo red
Row 1476	LP01-302-5_0	SP190705_04	8390	14	12	Data	450	11.11	2.85	2019-07-09	STF-001302	STF-001302-1	4860234	29192242	132	44	16.65	121.5	-11.2	33.3	Human fetal astrocytes	Synaptosomes pHrodo red
Row 1477	LP01-302-5_0	SP190705_04	8390	14	13	Data	450	11.11	3.73	2019-07-09	STF-001225	STF-001225-1	3101372	31575212	137	31	9.82	71.7	-15.7	22.6	Human fetal astrocytes	Synaptosomes pHrodo red
Row 1478	LP01-302-5_0	SP190705_04	8390	14	14	Data	450	11.11	2.7	2019-07-09	STF-001303	STF-001303-1	6247723	32409216	128	58	19.28	140.7	-7.6	45.3	Human fetal astrocytes	Synaptosomes pHrodo red
Row 1479	LP01-302-5_0	SP190705_04	8390	14	15	Data	450	11.11	3.38	2019-07-09	STF-001226	STF-001226-1	5069131	26594320	120	47	19.06	139.1	-0.4	39.2	Human fetal astrocytes	Synaptosomes pHrodo red
Row 1480	LP01-302-5_0	SP190705_04	8390	14	16	Data	450	11.11	3.9	2019-07-09	STF-001304	STF-001304-1	4257910	33449830	132	41	12.73	92.9	-11.2	31.1	Human fetal astrocytes	Synaptosomes pHrodo red
Row 1481	LP01-302-5_0	SP190705_04	8390	14	17	Data	450	11.11	2.16	2019-07-09	STF-001227	STF-001227-1	3426862	22534344	109	38	15.21	111	9.4	34.9	Human fetal astrocytes	Synaptosomes pHrodo red
Row 1482	LP01-302-5_0	SP190705_04	8390	14	18	Data	450	11.11	3.73	2019-07-09	STF-001305	STF-001305-1	4514712	32004352	147	50	14.11	102.9	-24.7	34	Human fetal astrocytes	Synaptosomes pHrodo red
Row 1483	LP01-302-5_0	SP190705_04	8390	14	19	Data	450	11.11	3.07	2019-07-09	STF-001228	STF-001228-1	4680530	31240764	126	40	14.98	109.3	-5.8	31.7	Human fetal astrocytes	Synaptosomes pHrodo red
Row 1484	LP01-302-5_0	SP190705_04	8390	14	20	Data	450	11.11	2.91	2019-07-09	STF-001306	STF-001306-1	3468750	28631944	118	32	12.11	88.4	1.3	27.1	Human fetal astrocytes	Synaptosomes pHrodo red
Row 1485	LP01-302-5_0	SP190705_04	8390	14	21	Data	450	11.11	4.13	2019-07-09	STF-001229	STF-001229-1	3497948	27682516	128	35	12.64	92.2	-7.6	27.3	Human fetal astrocytes	Synaptosomes pHrodo red
Row 1486	LP01-302-5_0	SP190705_04	8390	14	22	Data	450	11.11	4.44	2019-07-09	STF-001307	STF-001307-1	2899496	29136168	118	27	9.95	72.6	1.3	22.9	Human fetal astrocytes	Synaptosomes pHrodo red
Row 1487	LP01-302-5_0	SP190705_04	8390	14	23	Positive Control				2019-07-09			0	17911284	63	0	0	0	50.7	0	Human fetal astrocytes	None
Row 1488	LP01-302-5_0	SP190705_04	8390	14	24	Low Control				2019-07-09			345578	2783804	12	6	12.41	90.6	96.4	50	Human fetal astrocytes	Synaptosomes pHrodo red
Row 1489	LP01-302-5_0	SP190705_04	8390	15	1	High Control				2019-07-09			5471562	29568060	117	59	18.5	135	2.2	50.4	Human fetal astrocytes	Synaptosomes pHrodo red
Row 1490	LP01-302-5_0	SP190705_04	8390	15	2	High Control				2019-07-09			5034713	28010676	109	52	17.97	131.1	9.4	47.7	Human fetal astrocytes	Synaptosomes pHrodo red
Row 1491	LP01-302-5_0	SP190705_04	8390	15	3	Data	450	11.11	1.99	2019-07-09	STF-001071	STF-001071-1	3232571	25523648	104	35	12.67	92.4	13.9	33.7	Human fetal astrocytes	Synaptosomes pHrodo red
Row 1492	LP01-302-5_0	SP190705_04	8390	15	4	Data	450	11.11	3.6	2019-07-09	STF-001151	STF-001151-1	3884666	34871096	139	38	11.14	81.3	-17.5	27.3	Human fetal astrocytes	Synaptosomes pHrodo red
Row 1493	LP01-302-5_0	SP190705_04	8390	15	5	Data	450	11.11	1.53	2019-07-09	STF-001072	STF-001072-1	3433367	25336484	112	34	13.55	98.9	6.7	30.4	Human fetal astrocytes	Synaptosomes pHrodo red
Row 1494	LP01-302-5_0	SP190705_04	8390	15	6	Data	450	11.11	3.18	2019-07-09	STF-001152	STF-001152-1	2525299	29440472	131	28	8.58	62.6	-10.3	21.4	Human fetal astrocytes	Synaptosomes pHrodo red
Row 1495	LP01-302-5_0	SP190705_04	8390	15	7	Data	450	11.11	6.76	2019-07-09	STF-001073	STF-001073-1	3662456	31159568	130	37	11.75	85.8	-9.4	28.5	Human fetal astrocytes	Synaptosomes pHrodo red
Row 1496	LP01-302-5_0	SP190705_04	8390	15	8	Data	450	11.11	3.03	2019-07-09	STF-001153	STF-001153-1	4505067	26944548	112	50	16.72	122	6.7	44.6	Human fetal astrocytes	Synaptosomes pHrodo red
Row 1497	LP01-302-5_0	SP190705_04	8390	15	9	Data	450	11.11	4.02	2019-07-09	STF-001074	STF-001074-1	4880208	30026884	122	49	16.25	118.6	-2.2	40.2	Human fetal astrocytes	Synaptosomes pHrodo red
Row 1498	LP01-302-5_0	SP190705_04	8390	15	10	Data	450	11.11	4.78	2019-07-09	STF-001154	STF-001154-1	2905504	29106990	136	31	9.98	72.8	-14.8	22.8	Human fetal astrocytes	Synaptosomes pHrodo red
Row 1499	LP01-302-5_0	SP190705_04	8390	15	11	Data	450	11.11	4.19	2019-07-09	STF-001075	STF-001075-1	3576877	26042700	122	38	13.73	100.2	-2.2	31.1	Human fetal astrocytes	Synaptosomes pHrodo red
Row 1500	LP01-302-5_0	SP190705_04	8390	15	12	Data	450	11.11	7.12	2019-07-09	STF-001155	STF-001155-1	2638437	23931156	105	29	11.03	80.4	13	27.6	Human fetal astrocytes	Synaptosomes pHrodo red
Row 1501	LP01-302-5_0	SP190705_04	8390	15	13	Data	450	11.11	3.38	2019-07-09	STF-001076	STF-001076-1	2372318	26185820	116	27	9.06	66.1	3.1	23.3	Human fetal astrocytes	Synaptosomes pHrodo red
Row 1502	LP01-302-5_0	SP190705_04	8390	15	14	Data	450	11.11	2.96	2019-07-09	STF-001156	STF-001156-1	4017769	28168172	128	41	14.26	104.1	-7.6	32	Human fetal astrocytes	Synaptosomes pHrodo red
Row 1503	LP01-302-5_0	SP190705_04	8390	15	15	Data	450	11.11	1.94	2019-07-09	STF-001077	STF-001077-1	5260527	31142146	128	50	16.89	123.3	-7.6	39.1	Human fetal astrocytes	Synaptosomes pHrodo red
Row 1504	LP01-302-5_0	SP190705_04	8390	15	16	Data	450	11.11	2.5	2019-07-09	STF-001157	STF-001157-1	2871235	24000656	112	32	11.96	87.3	6.7	28.6	Human fetal astrocytes	Synaptosomes pHrodo red
Row 1505	LP01-302-5_0	SP190705_04	8390	15	17	Data	450	11.11	3.12	2019-07-09	STF-001078	STF-001078-1	2849592	22882192	110	33	12.45	90.9	8.5	30	Human fetal astrocytes	Synaptosomes pHrodo red
Row 1506	LP01-302-5_0	SP190705_04	8390	15	18	Data	450	11.11	2.38	2019-07-09	STF-001158	STF-001158-1	2408072	24584832	122	28	9.79	71.5	-2.2	23	Human fetal astrocytes	Synaptosomes pHrodo red
Row 1507	LP01-302-5_0	SP190705_04	8390	15	19	Data	450	11.11	2.95	2019-07-09	STF-001079	STF-001079-1	3215260	24394494	110	34	13.18	96.2	8.5	30.9	Human fetal astrocytes	Synaptosomes pHrodo red
Row 1508	LP01-302-5_0	SP190705_04	8390	15	20	Data	450	11.11	4.54	2019-07-09	STF-001159	STF-001159-1	4513485	29201230	124	45	15.46	112.8	-4	36.3	Human fetal astrocytes	Synaptosomes pHrodo red
Row 1509	LP01-302-5_0	SP190705_04	8390	15	21	Data	450	11.11	1.55	2019-07-09	STF-001080	STF-001080-1	3476971	25664224	107	32	13.55	98.9	11.2	29.9	Human fetal astrocytes	Synaptosomes pHrodo red
Row 1510	LP01-302-5_0	SP190705_04	8390	15	22	Data	450	11.11	1.35	2019-07-09	STF-001160	STF-001160-1	2741565	26959176	131	32	10.17	74.2	-10.3	24.4	Human fetal astrocytes	Synaptosomes pHrodo red
Row 1511	LP01-302-5_0	SP190705_04	8390	15	23	Positive Control				2019-07-09			0	13627499	55	0	0	0	57.8	0	Human fetal astrocytes	None
Row 1512	LP01-302-5_0	SP190705_04	8390	15	24	Low Control				2019-07-09			482277	2899291	9	6	16.63	121.4	99.1	66.7	Human fetal astrocytes	Synaptosomes pHrodo red
Row 1513	LP01-302-5_0	SP190705_04	8390	16	1	High Control				2019-07-09			2933773	24897960	106	34	11.78	86	12.1	32.1	Human fetal astrocytes	Synaptosomes pHrodo red
Row 1514	LP01-302-5_0	SP190705_04	8390	16	2	High Control				2019-07-09			3032657	26011164	113	35	11.66	85.1	5.8	31	Human fetal astrocytes	Synaptosomes pHrodo red
Row 1515	LP01-302-5_0	SP190705_04	8390	16	3	Data	450	11.11	2.47	2019-07-09	STF-001230	STF-001230-1	3675667	26625550	112	42	13.81	100.7	6.7	37.5	Human fetal astrocytes	Synaptosomes pHrodo red
Row 1516	LP01-302-5_0	SP190705_04	8390	16	4	Data	450	11.11	2.78	2019-07-09	STF-001308	STF-001308-1	3267533	24691008	100	32	13.23	96.6	17.5	32	Human fetal astrocytes	Synaptosomes pHrodo red
Row 1517	LP01-302-5_0	SP190705_04	8390	16	5	Data	450	11.11	4.84	2019-07-09	STF-001231	STF-001231-1	3089448	22517760	101	33	13.72	100.1	16.6	32.7	Human fetal astrocytes	Synaptosomes pHrodo red
Row 1518	LP01-302-5_0	SP190705_04	8390	16	6	Data	450	11.11	3.78	2019-07-09	STF-001309	STF-001309-1	2133163	21106566	94	23	10.11	73.7	22.9	24.5	Human fetal astrocytes	Synaptosomes pHrodo red
Row 1519	LP01-302-5_0	SP190705_04	8390	16	7	Data	450	11.11	3.26	2019-07-09	STF-001232	STF-001232-1	3351963	26673596	110	34	12.57	91.7	8.5	30.9	Human fetal astrocytes	Synaptosomes pHrodo red
Row 1520	LP01-302-5_0	SP190705_04	8390	16	8	Data	450	11.11	5.84	2019-07-09	STF-001310	STF-001310-1	3628543	27613992	111	40	13.14	95.9	7.6	36	Human fetal astrocytes	Synaptosomes pHrodo red
Row 1521	LP01-302-5_0	SP190705_04	8390	16	9	Data	450	11.11	2.71	2019-07-09	STF-001233	STF-001233-1	2557108	29701000	132	28	8.61	62.8	-11.2	21.2	Human fetal astrocytes	Synaptosomes pHrodo red
Row 1522	LP01-302-5_0	SP190705_04	8390	16	10	Data	450	11.11	4.09	2019-07-09	STF-001311	STF-001311-1	3966255	25765320	117	43	15.39	112.3	2.2	36.8	Human fetal astrocytes	Synaptosomes pHrodo red
Row 1523	LP01-302-5_0	SP190705_04	8390	16	11	Data	450	11.11	3.78	2019-07-09	STF-001234	STF-001234-1	3341874	28339348	120	36	11.79	86	-0.4	30	Human fetal astrocytes	Synaptosomes pHrodo red
Row 1524	LP01-302-5_0	SP190705_04	8390	16	12	Data	450	11.11	3.83	2019-07-09	STF-001312	STF-001312-1	2997045	27777312	119	28	10.79	78.7	0.4	23.5	Human fetal astrocytes	Synaptosomes pHrodo red
Row 1525	LP01-302-5_0	SP190705_04	8390	16	13	Data	450	11.11	4.43	2019-07-09	STF-001235	STF-001235-1	3585161	31179980	142	38	11.5	83.9	-20.2	26.8	Human fetal astrocytes	Synaptosomes pHrodo red
Row 1526	LP01-302-5_0	SP190705_04	8390	16	14	Data	450	11.11	3.11	2019-07-09	STF-001313	STF-001313-1	3100621	27379594	113	32	11.32	82.6	5.8	28.3	Human fetal astrocytes	Synaptosomes pHrodo red
Row 1527	LP01-302-5_0	SP190705_04	8390	16	15	Data	450	11.11	5.53	2019-07-09	STF-001236	STF-001236-1	3022238	26070104	118	39	11.59	84.6	1.3	33.1	Human fetal astrocytes	Synaptosomes pHrodo red
Row 1528	LP01-302-5_0	SP190705_04	8390	16	16	Data	450	11.11	5.82	2019-07-09	STF-001314	STF-001314-1	0	2083906	13	0	0	0	95.5	0	Human fetal astrocytes	Synaptosomes pHrodo red
Row 1529	LP01-302-5_0	SP190705_04	8390	16	17	Data	450	11.11	2.9	2019-07-09	STF-001237	STF-001237-1	4723405	29342846	119	45	16.1	117.5	0.4	37.8	Human fetal astrocytes	Synaptosomes pHrodo red
Row 1530	LP01-302-5_0	SP190705_04	8390	16	18	Data	450	11.11	2.38	2019-07-09	STF-001315	STF-001315-1	1969043	17636404	84	26	11.16	81.5	31.8	31	Human fetal astrocytes	Synaptosomes pHrodo red
Row 1531	LP01-302-5_0	SP190705_04	8390	16	19	Data	450	11.11	3.82	2019-07-09	STF-001238	STF-001238-1	3587798	25167840	114	39	14.26	104	4.9	34.2	Human fetal astrocytes	Synaptosomes pHrodo red
Row 1532	LP01-302-5_0	SP190705_04	8390	16	20	Data	450	11.11	2.89	2019-07-09	STF-001316	STF-001316-1	3312846	29591076	135	34	11.2	81.7	-13.9	25.2	Human fetal astrocytes	Synaptosomes pHrodo red
Row 1533	LP01-302-5_0	SP190705_04	8390	16	21	Data	450	11.11	4.01	2019-07-09	STF-001239	STF-001239-1	3202294	22371362	95	31	14.31	104.4	22	32.6	Human fetal astrocytes	Synaptosomes pHrodo red
Row 1534	LP01-302-5_0	SP190705_04	8390	16	22	Data	450	11.11	3.05	2019-07-09	STF-001317	STF-001317-1	3892149	23844980	94	35	16.32	119.1	22.9	37.2	Human fetal astrocytes	Synaptosomes pHrodo red
Row 1535	LP01-302-5_0	SP190705_04	8390	16	23	Positive Control				2019-07-09			0	14328304	62	0	0	0	51.6	0	Human fetal astrocytes	None
Row 1536	LP01-302-5_0	SP190705_04	8390	16	24	Low Control				2019-07-09			275406	1817136	6	3	15.16	110.6	101.8	50	Human fetal astrocytes	Synaptosomes pHrodo red
Row 1537	LP01-302-10_0	SP190705_05	8389	1	1	High Control				2019-07-09			5695908	37320984	132	50	15.26	115.4	7.1	37.9	Human fetal astrocytes	Synaptosomes pHrodo red
Row 1538	LP01-302-10_0	SP190705_05	8389	1	2	High Control				2019-07-09			5362087	38261700	148	52	14.01	105.9	-4.9	35.1	Human fetal astrocytes	Synaptosomes pHrodo red
Row 1539	LP01-302-10_0	SP190705_05	8389	1	3	Data	450	22.22	4.34	2019-07-09	STF-001001	STF-001001-1	6109059	37720656	145	54	16.2	122.4	-2.6	37.2	Human fetal astrocytes	Synaptosomes pHrodo red
Row 1540	LP01-302-10_0	SP190705_05	8389	1	4	Data	450	22.22	3.63	2019-07-09	STF-001081	STF-001081-1	7414716	43596520	153	60	17.01	128.6	-8.6	39.2	Human fetal astrocytes	Synaptosomes pHrodo red
Row 1541	LP01-302-10_0	SP190705_05	8389	1	5	Data	450	22.22	4.49	2019-07-09	STF-001002	STF-001002-1	4336035	38182632	150	45	11.36	85.8	-6.4	30	Human fetal astrocytes	Synaptosomes pHrodo red
Row 1542	LP01-302-10_0	SP190705_05	8389	1	6	Data	450	22.22	2.92	2019-07-09	STF-001082	STF-001082-1	5752921	36956548	145	53	15.57	117.7	-2.6	36.6	Human fetal astrocytes	Synaptosomes pHrodo red
Row 1543	LP01-302-10_0	SP190705_05	8389	1	7	Data	450	22.22	1.31	2019-07-09	STF-001003	STF-001003-1	5994899	41358672	149	52	14.49	109.6	-5.6	34.9	Human fetal astrocytes	Synaptosomes pHrodo red
Row 1544	LP01-302-10_0	SP190705_05	8389	1	8	Data	450	22.22	4.67	2019-07-09	STF-001083	STF-001083-1	7122219	40510936	151	59	17.58	132.9	-7.1	39.1	Human fetal astrocytes	Synaptosomes pHrodo red
Row 1545	LP01-302-10_0	SP190705_05	8389	1	9	Data	450	22.22	4.17	2019-07-09	STF-001004	STF-001004-1	6172002	40097104	148	54	15.39	116.4	-4.9	36.5	Human fetal astrocytes	Synaptosomes pHrodo red
Row 1546	LP01-302-10_0	SP190705_05	8389	1	10	Data	450	22.22	7.32	2019-07-09	STF-001084	STF-001084-1	4726713	32240912	128	40	14.66	110.8	10.2	31.3	Human fetal astrocytes	Synaptosomes pHrodo red
Row 1547	LP01-302-10_0	SP190705_05	8389	1	11	Data	450	22.22	2.29	2019-07-09	STF-001005	STF-001005-1	5203059	39823656	160	47	13.07	98.8	-13.9	29.4	Human fetal astrocytes	Synaptosomes pHrodo red
Row 1548	LP01-302-10_0	SP190705_05	8389	1	12	Data	450	22.22	3.7	2019-07-09	STF-001085	STF-001085-1	5390252	34875828	141	51	15.46	116.8	0.4	36.2	Human fetal astrocytes	Synaptosomes pHrodo red
Row 1549	LP01-302-10_0	SP190705_05	8389	1	13	Data	450	22.22	3.9	2019-07-09	STF-001006	STF-001006-1	5038534	32595280	123	41	15.46	116.8	13.9	33.3	Human fetal astrocytes	Synaptosomes pHrodo red
Row 1550	LP01-302-10_0	SP190705_05	8389	1	14	Data	450	22.22	6.54	2019-07-09	STF-001086	STF-001086-1	2918988	38569024	153	29	7.57	57.2	-8.6	19	Human fetal astrocytes	Synaptosomes pHrodo red
Row 1551	LP01-302-10_0	SP190705_05	8389	1	15	Data	450	22.22	4.86	2019-07-09	STF-001007	STF-001007-1	6075565	36674816	132	54	16.57	125.2	7.1	40.9	Human fetal astrocytes	Synaptosomes pHrodo red
Row 1552	LP01-302-10_0	SP190705_05	8389	1	16	Data	450	22.22	8.36	2019-07-09	STF-001087	STF-001087-1	4736554	36973856	149	42	12.81	96.8	-5.6	28.2	Human fetal astrocytes	Synaptosomes pHrodo red
Row 1553	LP01-302-10_0	SP190705_05	8389	1	17	Data	450	22.22	5	2019-07-09	STF-001008	STF-001008-1	4007725	40264816	149	32	9.95	75.2	-5.6	21.5	Human fetal astrocytes	Synaptosomes pHrodo red
Row 1554	LP01-302-10_0	SP190705_05	8389	1	18	Data	450	22.22	7.21	2019-07-09	STF-001088	STF-001088-1	4599192	35468184	150	43	12.97	98	-6.4	28.7	Human fetal astrocytes	Synaptosomes pHrodo red
Row 1555	LP01-302-10_0	SP190705_05	8389	1	19	Data	450	22.22	6.97	2019-07-09	STF-001009	STF-001009-1	5399126	37330368	142	51	14.46	109.3	-0.4	35.9	Human fetal astrocytes	Synaptosomes pHrodo red
Row 1556	LP01-302-10_0	SP190705_05	8389	1	20	Data	450	22.22	3.22	2019-07-09	STF-001089	STF-001089-1	4781558	34558920	135	44	13.84	104.6	4.9	32.6	Human fetal astrocytes	Synaptosomes pHrodo red
Row 1557	LP01-302-10_0	SP190705_05	8389	1	21	Data	450	22.22	8.57	2019-07-09	STF-001010	STF-001010-1	4821808	38095992	146	43	12.66	95.7	-3.4	29.5	Human fetal astrocytes	Synaptosomes pHrodo red
Row 1558	LP01-302-10_0	SP190705_05	8389	1	22	Data	450	22.22	2.25	2019-07-09	STF-001090	STF-001090-1	4544135	33604928	131	37	13.52	102.2	7.9	28.2	Human fetal astrocytes	Synaptosomes pHrodo red
Row 1559	LP01-302-10_0	SP190705_05	8389	1	23	Positive Control				2019-07-09			203148	12762900	52	1	1.59	12	67.3	1.9	Human fetal astrocytes	None
Row 1560	LP01-302-10_0	SP190705_05	8389	1	24	Low Control				2019-07-09			404653	3483897	14	8	11.61	87.8	95.9	57.1	Human fetal astrocytes	Synaptosomes pHrodo red
Row 1561	LP01-302-10_0	SP190705_05	8389	2	1	High Control				2019-07-09			5063257	37187980	146	50	13.62	102.9	-3.4	34.2	Human fetal astrocytes	Synaptosomes pHrodo red
Row 1562	LP01-302-10_0	SP190705_05	8389	2	2	High Control				2019-07-09			6670454	42924788	165	54	15.54	117.5	-17.7	32.7	Human fetal astrocytes	Synaptosomes pHrodo red
Row 1563	LP01-302-10_0	SP190705_05	8389	2	3	Data	450	22.22	5.38	2019-07-09	STF-001161	STF-001161-1	6339253	39595500	156	55	16.01	121	-10.9	35.3	Human fetal astrocytes	Synaptosomes pHrodo red
Row 1564	LP01-302-10_0	SP190705_05	8389	2	4	Data	450	22.22	8.53	2019-07-09	STF-001240	STF-001240-1	64541	17366352	74	1	0.37	2.8	50.8	1.4	Human fetal astrocytes	Synaptosomes pHrodo red
Row 1565	LP01-302-10_0	SP190705_05	8389	2	5	Data	450	22.22	8.1	2019-07-09	STF-001162	STF-001162-1	6334021	40752576	155	60	15.54	117.5	-10.2	38.7	Human fetal astrocytes	Synaptosomes pHrodo red
Row 1566	LP01-302-10_0	SP190705_05	8389	2	6	Data	450	22.22	26.73	2019-07-09	STF-001241	STF-001241-1	3937407	33967672	129	35	11.59	87.6	9.4	27.1	Human fetal astrocytes	Synaptosomes pHrodo red
Row 1567	LP01-302-10_0	SP190705_05	8389	2	7	Data	450	22.22	4.75	2019-07-09	STF-001163	STF-001163-1	6423799	38289272	147	51	16.78	126.8	-4.1	34.7	Human fetal astrocytes	Synaptosomes pHrodo red
Row 1568	LP01-302-10_0	SP190705_05	8389	2	8	Data	450	22.22	4.06	2019-07-09	STF-001242	STF-001242-1	6585190	40333888	151	60	16.33	123.4	-7.1	39.7	Human fetal astrocytes	Synaptosomes pHrodo red
Row 1569	LP01-302-10_0	SP190705_05	8389	2	9	Data	450	22.22	6.23	2019-07-09	STF-001164	STF-001164-1	1985855	36870044	114	19	5.39	40.7	20.7	16.7	Human fetal astrocytes	Synaptosomes pHrodo red
Row 1570	LP01-302-10_0	SP190705_05	8389	2	10	Data	450	22.22	7.72	2019-07-09	STF-001243	STF-001243-1	4210372	35246504	156	44	11.95	90.3	-10.9	28.2	Human fetal astrocytes	Synaptosomes pHrodo red
Row 1571	LP01-302-10_0	SP190705_05	8389	2	11	Data	450	22.22	9.28	2019-07-09	STF-001165	STF-001165-1	5166060	34915468	138	48	14.8	111.8	2.6	34.8	Human fetal astrocytes	Synaptosomes pHrodo red
Row 1572	LP01-302-10_0	SP190705_05	8389	2	12	Data	450	22.22	5.99	2019-07-09	STF-001244	STF-001244-1	4889815	36075456	144	43	13.55	102.5	-1.9	29.9	Human fetal astrocytes	Synaptosomes pHrodo red
Row 1573	LP01-302-10_0	SP190705_05	8389	2	13	Data	450	22.22	6.14	2019-07-09	STF-001166	STF-001166-1	4772338	37132136	161	45	12.85	97.1	-14.7	28	Human fetal astrocytes	Synaptosomes pHrodo red
Row 1574	LP01-302-10_0	SP190705_05	8389	2	14	Data	450	22.22	7.2	2019-07-09	STF-001245	STF-001245-1	5577668	37313992	141	46	14.95	113	0.4	32.6	Human fetal astrocytes	Synaptosomes pHrodo red
Row 1575	LP01-302-10_0	SP190705_05	8389	2	15	Data	450	22.22	5.19	2019-07-09	STF-001167	STF-001167-1	5803158	38183924	151	50	15.2	114.9	-7.1	33.1	Human fetal astrocytes	Synaptosomes pHrodo red
Row 1576	LP01-302-10_0	SP190705_05	8389	2	16	Data	450	22.22	9.75	2019-07-09	STF-001246	STF-001246-1	5536869	39635776	149	42	13.97	105.6	-5.6	28.2	Human fetal astrocytes	Synaptosomes pHrodo red
Row 1577	LP01-302-10_0	SP190705_05	8389	2	17	Data	450	22.22	6.43	2019-07-09	STF-001168	STF-001168-1	5897285	40253676	160	50	14.65	110.7	-13.9	31.3	Human fetal astrocytes	Synaptosomes pHrodo red
Row 1578	LP01-302-10_0	SP190705_05	8389	2	18	Data	450	22.22	4.36	2019-07-09	STF-001247	STF-001247-1	4082580	26099944	110	44	15.64	118.2	23.7	40	Human fetal astrocytes	Synaptosomes pHrodo red
Row 1579	LP01-302-10_0	SP190705_05	8389	2	19	Data	450	22.22	6.5	2019-07-09	STF-001169	STF-001169-1	5568561	39565604	155	45	14.07	106.4	-10.2	29	Human fetal astrocytes	Synaptosomes pHrodo red
Row 1580	LP01-302-10_0	SP190705_05	8389	2	20	Data	450	22.22	7.9	2019-07-09	STF-001248	STF-001248-1	3055911	30753794	121	29	9.94	75.1	15.4	24	Human fetal astrocytes	Synaptosomes pHrodo red
Row 1581	LP01-302-10_0	SP190705_05	8389	2	21	Data	450	22.22	7.83	2019-07-09	STF-001170	STF-001170-1	4332212	35062364	127	35	12.36	93.4	10.9	27.6	Human fetal astrocytes	Synaptosomes pHrodo red
Row 1582	LP01-302-10_0	SP190705_05	8389	2	22	Data	450	22.22	6.54	2019-07-09	STF-001249	STF-001249-1	5457629	39213384	156	44	13.92	105.2	-10.9	28.2	Human fetal astrocytes	Synaptosomes pHrodo red
Row 1583	LP01-302-10_0	SP190705_05	8389	2	23	Positive Control				2019-07-09			0	20651394	66	0	0	0	56.8	0	Human fetal astrocytes	None
Row 1584	LP01-302-10_0	SP190705_05	8389	2	24	Low Control				2019-07-09			203084	2415918	10	3	8.41	63.5	98.9	30	Human fetal astrocytes	Synaptosomes pHrodo red
Row 1585	LP01-302-10_0	SP190705_05	8389	3	1	High Control				2019-07-09			5631740	35677844	131	51	15.78	119.3	7.9	38.9	Human fetal astrocytes	Synaptosomes pHrodo red
Row 1586	LP01-302-10_0	SP190705_05	8389	3	2	High Control				2019-07-09			4319111	35161164	149	42	12.28	92.9	-5.6	28.2	Human fetal astrocytes	Synaptosomes pHrodo red
Row 1587	LP01-302-10_0	SP190705_05	8389	3	3	Data	450	22.22	4.74	2019-07-09	STF-001011	STF-001011-1	5591504	34816380	139	50	16.06	121.4	1.9	36	Human fetal astrocytes	Synaptosomes pHrodo red
Row 1588	LP01-302-10_0	SP190705_05	8389	3	4	Data	450	22.22	3.58	2019-07-09	STF-001091	STF-001091-1	5482828	34995268	146	49	15.67	118.4	-3.4	33.6	Human fetal astrocytes	Synaptosomes pHrodo red
Row 1589	LP01-302-10_0	SP190705_05	8389	3	5	Data	450	22.22	9.65	2019-07-09	STF-001012	STF-001012-1	5273472	32975268	129	50	15.99	120.9	9.4	38.8	Human fetal astrocytes	Synaptosomes pHrodo red
Row 1590	LP01-302-10_0	SP190705_05	8389	3	6	Data	450	22.22	7.16	2019-07-09	STF-001092	STF-001092-1	3933076	30210968	128	41	13.02	98.4	10.2	32	Human fetal astrocytes	Synaptosomes pHrodo red
Row 1591	LP01-302-10_0	SP190705_05	8389	3	7	Data	450	22.22	7.76	2019-07-09	STF-001013	STF-001013-1	5550742	39100812	143	44	14.2	107.3	-1.1	30.8	Human fetal astrocytes	Synaptosomes pHrodo red
Row 1592	LP01-302-10_0	SP190705_05	8389	3	8	Data	450	22.22	4.34	2019-07-09	STF-001093	STF-001093-1	3797621	33085812	124	34	11.48	86.8	13.2	27.4	Human fetal astrocytes	Synaptosomes pHrodo red
Row 1593	LP01-302-10_0	SP190705_05	8389	3	9	Data	450	22.22	9.34	2019-07-09	STF-001014	STF-001014-1	3897822	31969548	133	35	12.19	92.2	6.4	26.3	Human fetal astrocytes	Synaptosomes pHrodo red
Row 1594	LP01-302-10_0	SP190705_05	8389	3	10	Data	450	22.22	7.09	2019-07-09	STF-001094	STF-001094-1	3505272	27558644	116	32	12.72	96.1	19.2	27.6	Human fetal astrocytes	Synaptosomes pHrodo red
Row 1595	LP01-302-10_0	SP190705_05	8389	3	11	Data	450	22.22	5.94	2019-07-09	STF-001015	STF-001015-1	4349631	35798336	146	38	12.15	91.8	-3.4	26	Human fetal astrocytes	Synaptosomes pHrodo red
Row 1596	LP01-302-10_0	SP190705_05	8389	3	12	Data	450	22.22	8.13	2019-07-09	STF-001095	STF-001095-1	2293443	31690136	123	21	7.24	54.7	13.9	17.1	Human fetal astrocytes	Synaptosomes pHrodo red
Row 1597	LP01-302-10_0	SP190705_05	8389	3	13	Data	450	22.22	8.72	2019-07-09	STF-001016	STF-001016-1	5530658	37713040	147	53	14.67	110.9	-4.1	36.1	Human fetal astrocytes	Synaptosomes pHrodo red
Row 1598	LP01-302-10_0	SP190705_05	8389	3	14	Data	450	22.22	8.49	2019-07-09	STF-001096	STF-001096-1	5075859	33819136	126	41	15.01	113.4	11.7	32.5	Human fetal astrocytes	Synaptosomes pHrodo red
Row 1599	LP01-302-10_0	SP190705_05	8389	3	15	Data	450	22.22	6.54	2019-07-09	STF-001017	STF-001017-1	4446777	35688696	150	44	12.46	94.2	-6.4	29.3	Human fetal astrocytes	Synaptosomes pHrodo red
Row 1600	LP01-302-10_0	SP190705_05	8389	3	16	Data	450	22.22	3.85	2019-07-09	STF-001097	STF-001097-1	5337705	36344844	144	46	14.69	111	-1.9	31.9	Human fetal astrocytes	Synaptosomes pHrodo red
Row 1601	LP01-302-10_0	SP190705_05	8389	3	17	Data	450	22.22	4.38	2019-07-09	STF-001018	STF-001018-1	4675702	34197296	136	45	13.67	103.3	4.1	33.1	Human fetal astrocytes	Synaptosomes pHrodo red
Row 1602	LP01-302-10_0	SP190705_05	8389	3	18	Data	450	22.22	3.86	2019-07-09	STF-001098	STF-001098-1	4719914	32248364	128	39	14.64	110.6	10.2	30.5	Human fetal astrocytes	Synaptosomes pHrodo red
Row 1603	LP01-302-10_0	SP190705_05	8389	3	19	Data	450	22.22	11.95	2019-07-09	STF-001019	STF-001019-1	4708778	37860280	151	44	12.44	94	-7.1	29.1	Human fetal astrocytes	Synaptosomes pHrodo red
Row 1604	LP01-302-10_0	SP190705_05	8389	3	20	Data	450	22.22	3.22	2019-07-09	STF-001099	STF-001099-1	5065487	38063068	152	44	13.31	100.6	-7.9	28.9	Human fetal astrocytes	Synaptosomes pHrodo red
Row 1605	LP01-302-10_0	SP190705_05	8389	3	21	Data	450	22.22	10.1	2019-07-09	STF-001020	STF-001020-1	3347462	31379874	133	27	10.67	80.6	6.4	20.3	Human fetal astrocytes	Synaptosomes pHrodo red
Row 1606	LP01-302-10_0	SP190705_05	8389	3	22	Data	450	22.22	8.46	2019-07-09	STF-001100	STF-001100-1	5010836	34583680	138	39	14.49	109.5	2.6	28.3	Human fetal astrocytes	Synaptosomes pHrodo red
Row 1607	LP01-302-10_0	SP190705_05	8389	3	23	Positive Control				2019-07-09			0	21761248	85	0	0	0	42.5	0	Human fetal astrocytes	None
Row 1608	LP01-302-10_0	SP190705_05	8389	3	24	Low Control				2019-07-09			232739	1757655	6	3	13.24	100.1	101.9	50	Human fetal astrocytes	Synaptosomes pHrodo red
Row 1609	LP01-302-10_0	SP190705_05	8389	4	1	High Control				2019-07-09			7960807	41022944	146	71	19.41	146.7	-3.4	48.6	Human fetal astrocytes	Synaptosomes pHrodo red
Row 1610	LP01-302-10_0	SP190705_05	8389	4	2	High Control				2019-07-09			5287992	34129520	127	50	15.49	117.1	10.9	39.4	Human fetal astrocytes	Synaptosomes pHrodo red
Row 1611	LP01-302-10_0	SP190705_05	8389	4	3	Data	450	22.22	16.68	2019-07-09	STF-001171	STF-001171-1	3628608	46983164	146	24	7.72	58.4	-3.4	16.4	Human fetal astrocytes	Synaptosomes pHrodo red
Row 1612	LP01-302-10_0	SP190705_05	8389	4	4	Data	450	22.22	7.11	2019-07-09	STF-001250	STF-001250-1	5849102	36457368	130	51	16.04	121.3	8.6	39.2	Human fetal astrocytes	Synaptosomes pHrodo red
Row 1613	LP01-302-10_0	SP190705_05	8389	4	5	Data	450	22.22	3.41	2019-07-09	STF-001172	STF-001172-1	4798688	32689344	121	44	14.68	111	15.4	36.4	Human fetal astrocytes	Synaptosomes pHrodo red
Row 1614	LP01-302-10_0	SP190705_05	8389	4	6	Data	450	22.22	2.27	2019-07-09	STF-001251	STF-001251-1	4254370	31442360	124	37	13.53	102.3	13.2	29.8	Human fetal astrocytes	Synaptosomes pHrodo red
Row 1615	LP01-302-10_0	SP190705_05	8389	4	7	Data	450	22.22	7.36	2019-07-09	STF-001173	STF-001173-1	3759372	34729380	124	28	10.82	81.8	13.2	22.6	Human fetal astrocytes	Synaptosomes pHrodo red
Row 1616	LP01-302-10_0	SP190705_05	8389	4	8	Data	450	22.22	3.77	2019-07-09	STF-001252	STF-001252-1	3907561	29598456	117	33	13.2	99.8	18.4	28.2	Human fetal astrocytes	Synaptosomes pHrodo red
Row 1617	LP01-302-10_0	SP190705_05	8389	4	9	Data	450	22.22	9.57	2019-07-09	STF-001174	STF-001174-1	4681155	38733744	153	41	12.09	91.4	-8.6	26.8	Human fetal astrocytes	Synaptosomes pHrodo red
Row 1618	LP01-302-10_0	SP190705_05	8389	4	10	Data	450	22.22	6.57	2019-07-09	STF-001253	STF-001253-1	5653737	39134672	149	43	14.45	109.2	-5.6	28.9	Human fetal astrocytes	Synaptosomes pHrodo red
Row 1619	LP01-302-10_0	SP190705_05	8389	4	11	Data	450	22.22	7.4	2019-07-09	STF-001175	STF-001175-1	4896069	31982858	134	49	15.31	115.7	5.6	36.6	Human fetal astrocytes	Synaptosomes pHrodo red
Row 1620	LP01-302-10_0	SP190705_05	8389	4	12	Data	450	22.22	6.36	2019-07-09	STF-001254	STF-001254-1	5383816	33076546	129	46	16.28	123	9.4	35.7	Human fetal astrocytes	Synaptosomes pHrodo red
Row 1621	LP01-302-10_0	SP190705_05	8389	4	13	Data	450	22.22	10.27	2019-07-09	STF-001176	STF-001176-1	3899031	35018484	151	37	11.13	84.2	-7.1	24.5	Human fetal astrocytes	Synaptosomes pHrodo red
Row 1622	LP01-302-10_0	SP190705_05	8389	4	14	Data	450	22.22	7.12	2019-07-09	STF-001255	STF-001255-1	5607707	39682400	155	46	14.13	106.8	-10.2	29.7	Human fetal astrocytes	Synaptosomes pHrodo red
Row 1623	LP01-302-10_0	SP190705_05	8389	4	15	Data	450	22.22	5.65	2019-07-09	STF-001177	STF-001177-1	3944800	30700532	129	35	12.85	97.1	9.4	27.1	Human fetal astrocytes	Synaptosomes pHrodo red
Row 1624	LP01-302-10_0	SP190705_05	8389	4	16	Data	450	22.22	8.17	2019-07-09	STF-001256	STF-001256-1	5204294	35502652	142	49	14.66	110.8	-0.4	34.5	Human fetal astrocytes	Synaptosomes pHrodo red
Row 1625	LP01-302-10_0	SP190705_05	8389	4	17	Data	450	22.22	5.93	2019-07-09	STF-001178	STF-001178-1	5571217	38270452	148	47	14.56	110	-4.9	31.8	Human fetal astrocytes	Synaptosomes pHrodo red
Row 1626	LP01-302-10_0	SP190705_05	8389	4	18	Data	450	22.22	9.01	2019-07-09	STF-001257	STF-001257-1	3987087	33049008	125	32	12.06	91.2	12.4	25.6	Human fetal astrocytes	Synaptosomes pHrodo red
Row 1627	LP01-302-10_0	SP190705_05	8389	4	19	Data	450	22.22	6.45	2019-07-09	STF-001179	STF-001179-1	3624373	31300676	131	36	11.58	87.5	7.9	27.5	Human fetal astrocytes	Synaptosomes pHrodo red
Row 1628	LP01-302-10_0	SP190705_05	8389	4	20	Data	450	22.22	12.32	2019-07-09	STF-001258	STF-001258-1	3563333	28781472	120	33	12.38	93.6	16.2	27.5	Human fetal astrocytes	Synaptosomes pHrodo red
Row 1629	LP01-302-10_0	SP190705_05	8389	4	21	Data	450	22.22	4.09	2019-07-09	STF-001180	STF-001180-1	4187344	34483448	136	33	12.14	91.8	4.1	24.3	Human fetal astrocytes	Synaptosomes pHrodo red
Row 1630	LP01-302-10_0	SP190705_05	8389	4	22	Data	450	22.22	10.22	2019-07-09	STF-001259	STF-001259-1	2922599	33539928	130	22	8.71	65.9	8.6	16.9	Human fetal astrocytes	Synaptosomes pHrodo red
Row 1631	LP01-302-10_0	SP190705_05	8389	4	23	Positive Control				2019-07-09			0	21469210	79	0	0	0	47	0	Human fetal astrocytes	None
Row 1632	LP01-302-10_0	SP190705_05	8389	4	24	Low Control				2019-07-09			130335	779479	3	2	16.72	126.4	104.1	66.7	Human fetal astrocytes	Synaptosomes pHrodo red
Row 1633	LP01-302-10_0	SP190705_05	8389	5	1	High Control				2019-07-09			5692209	37404376	147	57	15.22	115	-4.1	38.8	Human fetal astrocytes	Synaptosomes pHrodo red
Row 1634	LP01-302-10_0	SP190705_05	8389	5	2	High Control				2019-07-09			5889211	37783860	147	57	15.59	117.8	-4.1	38.8	Human fetal astrocytes	Synaptosomes pHrodo red
Row 1635	LP01-302-10_0	SP190705_05	8389	5	3	Data	450	22.22	8.29	2019-07-09	STF-001021	STF-001021-1	6505419	35143484	138	63	18.51	139.9	2.6	45.7	Human fetal astrocytes	Synaptosomes pHrodo red
Row 1636	LP01-302-10_0	SP190705_05	8389	5	4	Data	450	22.22	4.49	2019-07-09	STF-001101	STF-001101-1	4809993	37998360	148	39	12.66	95.7	-4.9	26.4	Human fetal astrocytes	Synaptosomes pHrodo red
Row 1637	LP01-302-10_0	SP190705_05	8389	5	5	Data	450	22.22	9.6	2019-07-09	STF-001022	STF-001022-1	4118790	30425312	118	37	13.54	102.3	17.7	31.4	Human fetal astrocytes	Synaptosomes pHrodo red
Row 1638	LP01-302-10_0	SP190705_05	8389	5	6	Data	450	22.22	3.02	2019-07-09	STF-001102	STF-001102-1	7168414	38899412	144	64	18.43	139.3	-1.9	44.4	Human fetal astrocytes	Synaptosomes pHrodo red
Row 1639	LP01-302-10_0	SP190705_05	8389	5	7	Data	450	22.22	2.25	2019-07-09	STF-001023	STF-001023-1	6079037	33733600	124	51	18.02	136.2	13.2	41.1	Human fetal astrocytes	Synaptosomes pHrodo red
Row 1640	LP01-302-10_0	SP190705_05	8389	5	8	Data	450	22.22	2.46	2019-07-09	STF-001103	STF-001103-1	4777602	32558712	123	43	14.67	110.9	13.9	35	Human fetal astrocytes	Synaptosomes pHrodo red
Row 1641	LP01-302-10_0	SP190705_05	8389	5	9	Data	450	22.22	10.37	2019-07-09	STF-001024	STF-001024-1	4107004	33537588	139	42	12.25	92.6	1.9	30.2	Human fetal astrocytes	Synaptosomes pHrodo red
Row 1642	LP01-302-10_0	SP190705_05	8389	5	10	Data	450	22.22	6.93	2019-07-09	STF-001104	STF-001104-1	6081143	34763756	128	44	17.49	132.2	10.2	34.4	Human fetal astrocytes	Synaptosomes pHrodo red
Row 1643	LP01-302-10_0	SP190705_05	8389	5	11	Data	450	22.22	4.35	2019-07-09	STF-001025	STF-001025-1	5210118	37887944	136	41	13.75	103.9	4.1	30.1	Human fetal astrocytes	Synaptosomes pHrodo red
Row 1644	LP01-302-10_0	SP190705_05	8389	5	12	Data	450	22.22	6.66	2019-07-09	STF-001105	STF-001105-1	4806890	35781620	145	44	13.43	101.5	-2.6	30.3	Human fetal astrocytes	Synaptosomes pHrodo red
Row 1645	LP01-302-10_0	SP190705_05	8389	5	13	Data	450	22.22	7.25	2019-07-09	STF-001026	STF-001026-1	2751060	29683584	123	24	9.27	70.1	13.9	19.5	Human fetal astrocytes	Synaptosomes pHrodo red
Row 1646	LP01-302-10_0	SP190705_05	8389	5	14	Data	450	22.22	6.53	2019-07-09	STF-001106	STF-001106-1	4028052	35300696	144	38	11.41	86.3	-1.9	26.4	Human fetal astrocytes	Synaptosomes pHrodo red
Row 1647	LP01-302-10_0	SP190705_05	8389	5	15	Data	450	22.22	6.16	2019-07-09	STF-001027	STF-001027-1	7107923	41113732	157	61	17.29	130.7	-11.7	38.9	Human fetal astrocytes	Synaptosomes pHrodo red
Row 1648	LP01-302-10_0	SP190705_05	8389	5	16	Data	450	22.22	6.53	2019-07-09	STF-001107	STF-001107-1	4550951	36815392	142	44	12.36	93.4	-0.4	31	Human fetal astrocytes	Synaptosomes pHrodo red
Row 1649	LP01-302-10_0	SP190705_05	8389	5	17	Data	450	22.22	10.5	2019-07-09	STF-001028	STF-001028-1	4030145	34381400	139	39	11.72	88.6	1.9	28.1	Human fetal astrocytes	Synaptosomes pHrodo red
Row 1650	LP01-302-10_0	SP190705_05	8389	5	18	Data	450	22.22	2.25	2019-07-09	STF-001108	STF-001108-1	5780479	37641516	144	48	15.36	116.1	-1.9	33.3	Human fetal astrocytes	Synaptosomes pHrodo red
Row 1651	LP01-302-10_0	SP190705_05	8389	5	19	Data	450	22.22	4.76	2019-07-09	STF-001029	STF-001029-1	5084443	36514400	148	39	13.92	105.3	-4.9	26.4	Human fetal astrocytes	Synaptosomes pHrodo red
Row 1652	LP01-302-10_0	SP190705_05	8389	5	20	Data	450	22.22	4.22	2019-07-09	STF-001109	STF-001109-1	3068844	35421008	139	23	8.66	65.5	1.9	16.5	Human fetal astrocytes	Synaptosomes pHrodo red
Row 1653	LP01-302-10_0	SP190705_05	8389	5	21	Data	450	22.22	8.54	2019-07-09	STF-001030	STF-001030-1	5534258	37885496	154	49	14.61	110.4	-9.4	31.8	Human fetal astrocytes	Synaptosomes pHrodo red
Row 1654	LP01-302-10_0	SP190705_05	8389	5	22	Data	450	22.22	7.19	2019-07-09	STF-001110	STF-001110-1	4551416	40534688	149	39	11.23	84.9	-5.6	26.2	Human fetal astrocytes	Synaptosomes pHrodo red
Row 1655	LP01-302-10_0	SP190705_05	8389	5	23	Positive Control				2019-07-09			0	21405556	84	0	0	0	43.2	0	Human fetal astrocytes	None
Row 1656	LP01-302-10_0	SP190705_05	8389	5	24	Low Control				2019-07-09			289346	2633007	10	5	10.99	83.1	98.9	50	Human fetal astrocytes	Synaptosomes pHrodo red
Row 1657	LP01-302-10_0	SP190705_05	8389	6	1	High Control				2019-07-09			5682910	38097532	144	51	14.92	112.8	-1.9	35.4	Human fetal astrocytes	Synaptosomes pHrodo red
Row 1658	LP01-302-10_0	SP190705_05	8389	6	2	High Control				2019-07-09			4780370	33018104	144	50	14.48	109.4	-1.9	34.7	Human fetal astrocytes	Synaptosomes pHrodo red
Row 1659	LP01-302-10_0	SP190705_05	8389	6	3	Data	450	22.22	5.36	2019-07-09	STF-001181	STF-001181-1	5224792	39644824	146	49	13.18	99.6	-3.4	33.6	Human fetal astrocytes	Synaptosomes pHrodo red
Row 1660	LP01-302-10_0	SP190705_05	8389	6	4	Data	450	22.22	8.69	2019-07-09	STF-080497	STF-080497-2	4889118	31783332	118	44	15.38	116.3	17.7	37.3	Human fetal astrocytes	Synaptosomes pHrodo red
Row 1661	LP01-302-10_0	SP190705_05	8389	6	5	Data	450	22.22	3.06	2019-07-09	STF-001182	STF-001182-1	4542926	36386608	160	47	12.49	94.4	-13.9	29.4	Human fetal astrocytes	Synaptosomes pHrodo red
Row 1662	LP01-302-10_0	SP190705_05	8389	6	6	Data	450	22.22	10.97	2019-07-09	STF-001260	STF-001260-1	5830181	38303244	136	47	15.22	115.1	4.1	34.6	Human fetal astrocytes	Synaptosomes pHrodo red
Row 1663	LP01-302-10_0	SP190705_05	8389	6	7	Data	450	22.22	5.54	2019-07-09	STF-001183	STF-001183-1	555911	6288354	34	6	8.84	66.8	80.8	17.6	Human fetal astrocytes	Synaptosomes pHrodo red
Row 1664	LP01-302-10_0	SP190705_05	8389	6	8	Data	450	22.22	3.4	2019-07-09	STF-001261	STF-001261-1	4619373	38509128	158	38	12	90.7	-12.4	24.1	Human fetal astrocytes	Synaptosomes pHrodo red
Row 1665	LP01-302-10_0	SP190705_05	8389	6	9	Data	450	22.22	9.56	2019-07-09	STF-001184	STF-001184-1	5022157	34998296	134	46	14.35	108.5	5.6	34.3	Human fetal astrocytes	Synaptosomes pHrodo red
Row 1666	LP01-302-10_0	SP190705_05	8389	6	10	Data	450	22.22	8.69	2019-07-09	STF-001262	STF-001262-1	5615065	34245056	140	55	16.4	123.9	1.1	39.3	Human fetal astrocytes	Synaptosomes pHrodo red
Row 1667	LP01-302-10_0	SP190705_05	8389	6	11	Data	450	22.22	9.85	2019-07-09	STF-001185	STF-001185-1	5253818	35780992	129	41	14.68	111	9.4	31.8	Human fetal astrocytes	Synaptosomes pHrodo red
Row 1668	LP01-302-10_0	SP190705_05	8389	6	12	Data	450	22.22	13.3	2019-07-09	STF-001263	STF-001263-1	3806038	31069032	126	33	12.25	92.6	11.7	26.2	Human fetal astrocytes	Synaptosomes pHrodo red
Row 1669	LP01-302-10_0	SP190705_05	8389	6	13	Data	450	22.22	7.92	2019-07-09	STF-001186	STF-001186-1	5593272	38455272	144	42	14.54	109.9	-1.9	29.2	Human fetal astrocytes	Synaptosomes pHrodo red
Row 1670	LP01-302-10_0	SP190705_05	8389	6	14	Data	450	22.22	10.97	2019-07-09	STF-001264	STF-001264-1	6093869	38511288	145	54	15.82	119.6	-2.6	37.2	Human fetal astrocytes	Synaptosomes pHrodo red
Row 1671	LP01-302-10_0	SP190705_05	8389	6	15	Data	450	22.22	8.84	2019-07-09	STF-001187	STF-001187-1	3987297	39586032	157	31	10.07	76.1	-11.7	19.7	Human fetal astrocytes	Synaptosomes pHrodo red
Row 1672	LP01-302-10_0	SP190705_05	8389	6	16	Data	450	22.22	2.27	2019-07-09	STF-001265	STF-001265-1	4352361	32448716	139	40	13.41	101.4	1.9	28.8	Human fetal astrocytes	Synaptosomes pHrodo red
Row 1673	LP01-302-10_0	SP190705_05	8389	6	17	Data	450	22.22	4.76	2019-07-09	STF-001188	STF-001188-1	6208719	38544420	147	48	16.11	121.8	-4.1	32.7	Human fetal astrocytes	Synaptosomes pHrodo red
Row 1674	LP01-302-10_0	SP190705_05	8389	6	18	Data	450	22.22	5.92	2019-07-09	STF-001266	STF-001266-1	6400084	34470016	123	49	18.57	140.3	13.9	39.8	Human fetal astrocytes	Synaptosomes pHrodo red
Row 1675	LP01-302-10_0	SP190705_05	8389	6	19	Data	450	22.22	8.37	2019-07-09	STF-001189	STF-001189-1	2831119	31974760	128	27	8.85	66.9	10.2	21.1	Human fetal astrocytes	Synaptosomes pHrodo red
Row 1676	LP01-302-10_0	SP190705_05	8389	6	20	Data	450	22.22	6.32	2019-07-09	STF-001267	STF-001267-1	3095021	32396448	125	28	9.55	72.2	12.4	22.4	Human fetal astrocytes	Synaptosomes pHrodo red
Row 1677	LP01-302-10_0	SP190705_05	8389	6	21	Data	450	22.22	15.72	2019-07-09	STF-001190	STF-001190-1	5001065	34752500	134	44	14.39	108.8	5.6	32.8	Human fetal astrocytes	Synaptosomes pHrodo red
Row 1678	LP01-302-10_0	SP190705_05	8389	6	22	Data	450	22.22	3.56	2019-07-09	STF-001268	STF-001268-1	3970994	33172708	147	39	11.97	90.5	-4.1	26.5	Human fetal astrocytes	Synaptosomes pHrodo red
Row 1679	LP01-302-10_0	SP190705_05	8389	6	23	Positive Control				2019-07-09			98049	21078608	68	1	0.47	3.5	55.3	1.5	Human fetal astrocytes	None
Row 1680	LP01-302-10_0	SP190705_05	8389	6	24	Low Control				2019-07-09			253186	3043278	14	4	8.32	62.9	95.9	28.6	Human fetal astrocytes	Synaptosomes pHrodo red
Row 1681	LP01-302-10_0	SP190705_05	8389	7	1	High Control				2019-07-09			4186708	36388552	137	38	11.51	87	3.4	27.7	Human fetal astrocytes	Synaptosomes pHrodo red
Row 1682	LP01-302-10_0	SP190705_05	8389	7	2	High Control				2019-07-09			4134018	34636712	140	42	11.94	90.2	1.1	30	Human fetal astrocytes	Synaptosomes pHrodo red
Row 1683	LP01-302-10_0	SP190705_05	8389	7	3	Data	450	22.22	3.41	2019-07-09	STF-001031	STF-001031-1	5005824	36248460	148	49	13.81	104.4	-4.9	33.1	Human fetal astrocytes	Synaptosomes pHrodo red
Row 1684	LP01-302-10_0	SP190705_05	8389	7	4	Data	450	22.22	5.91	2019-07-09	STF-001111	STF-001111-1	3696188	42915068	164	35	8.61	65.1	-16.9	21.3	Human fetal astrocytes	Synaptosomes pHrodo red
Row 1685	LP01-302-10_0	SP190705_05	8389	7	5	Data	450	22.22	2.09	2019-07-09	STF-001032	STF-001032-1	5022910	37284760	126	42	13.47	101.8	11.7	33.3	Human fetal astrocytes	Synaptosomes pHrodo red
Row 1686	LP01-302-10_0	SP190705_05	8389	7	6	Data	450	22.22	6.97	2019-07-09	STF-001112	STF-001112-1	5638257	37304476	148	52	15.11	114.2	-4.9	35.1	Human fetal astrocytes	Synaptosomes pHrodo red
Row 1687	LP01-302-10_0	SP190705_05	8389	7	7	Data	450	22.22	6.26	2019-07-09	STF-001033	STF-001033-1	5497873	35096464	131	52	15.67	118.4	7.9	39.7	Human fetal astrocytes	Synaptosomes pHrodo red
Row 1688	LP01-302-10_0	SP190705_05	8389	7	8	Data	450	22.22	12.59	2019-07-09	STF-001113	STF-001113-1	3770883	27189326	115	33	13.87	104.8	19.9	28.7	Human fetal astrocytes	Synaptosomes pHrodo red
Row 1689	LP01-302-10_0	SP190705_05	8389	7	9	Data	450	22.22	9.79	2019-07-09	STF-001034	STF-001034-1	5218220	30713416	126	54	16.99	128.4	11.7	42.9	Human fetal astrocytes	Synaptosomes pHrodo red
Row 1690	LP01-302-10_0	SP190705_05	8389	7	10	Data	450	22.22	6.36	2019-07-09	STF-001114	STF-001114-1	4774353	34099264	122	35	14	105.8	14.7	28.7	Human fetal astrocytes	Synaptosomes pHrodo red
Row 1691	LP01-302-10_0	SP190705_05	8389	7	11	Data	450	22.22	5.43	2019-07-09	STF-001035	STF-001035-1	5228705	34899736	124	40	14.98	113.2	13.2	32.3	Human fetal astrocytes	Synaptosomes pHrodo red
Row 1692	LP01-302-10_0	SP190705_05	8389	7	12	Data	450	22.22	4.87	2019-07-09	STF-001115	STF-001115-1	5510135	34603536	128	46	15.92	120.4	10.2	35.9	Human fetal astrocytes	Synaptosomes pHrodo red
Row 1693	LP01-302-10_0	SP190705_05	8389	7	13	Data	450	22.22	5.22	2019-07-09	STF-001036	STF-001036-1	5549340	34936240	128	43	15.88	120.1	10.2	33.6	Human fetal astrocytes	Synaptosomes pHrodo red
Row 1694	LP01-302-10_0	SP190705_05	8389	7	14	Data	450	22.22	6.97	2019-07-09	STF-001116	STF-001116-1	3290443	30464872	125	29	10.8	81.6	12.4	23.2	Human fetal astrocytes	Synaptosomes pHrodo red
Row 1695	LP01-302-10_0	SP190705_05	8389	7	15	Data	450	22.22	5	2019-07-09	STF-001037	STF-001037-1	6132445	38736456	152	49	15.83	119.7	-7.9	32.2	Human fetal astrocytes	Synaptosomes pHrodo red
Row 1696	LP01-302-10_0	SP190705_05	8389	7	16	Data	450	22.22	3.99	2019-07-09	STF-001117	STF-001117-1	5707703	38403464	138	47	14.86	112.3	2.6	34.1	Human fetal astrocytes	Synaptosomes pHrodo red
Row 1697	LP01-302-10_0	SP190705_05	8389	7	17	Data	450	22.22	4	2019-07-09	STF-001038	STF-001038-1	5259000	37007496	144	51	14.21	107.4	-1.9	35.4	Human fetal astrocytes	Synaptosomes pHrodo red
Row 1698	LP01-302-10_0	SP190705_05	8389	7	18	Data	450	22.22	8.59	2019-07-09	STF-001118	STF-001118-1	5050418	38036812	155	43	13.28	100.4	-10.2	27.7	Human fetal astrocytes	Synaptosomes pHrodo red
Row 1699	LP01-302-10_0	SP190705_05	8389	7	19	Data	450	22.22	4.94	2019-07-09	STF-001039	STF-001039-1	5348523	39927556	156	47	13.4	101.3	-10.9	30.1	Human fetal astrocytes	Synaptosomes pHrodo red
Row 1700	LP01-302-10_0	SP190705_05	8389	7	20	Data	450	22.22	4.92	2019-07-09	STF-001119	STF-001119-1	4062045	35215472	144	38	11.53	87.2	-1.9	26.4	Human fetal astrocytes	Synaptosomes pHrodo red
Row 1701	LP01-302-10_0	SP190705_05	8389	7	21	Data	450	22.22	9.73	2019-07-09	STF-001040	STF-001040-1	4524511	36251960	140	42	12.48	94.3	1.1	30	Human fetal astrocytes	Synaptosomes pHrodo red
Row 1702	LP01-302-10_0	SP190705_05	8389	7	22	Data	450	22.22	2.4	2019-07-09	STF-001120	STF-001120-1	5018350	37072380	130	36	13.54	102.3	8.6	27.7	Human fetal astrocytes	Synaptosomes pHrodo red
Row 1703	LP01-302-10_0	SP190705_05	8389	7	23	Positive Control				2019-07-09			0	22009396	85	0	0	0	42.5	0	Human fetal astrocytes	None
Row 1704	LP01-302-10_0	SP190705_05	8389	7	24	Low Control				2019-07-09			517713	3336597	11	7	15.52	117.3	98.1	63.6	Human fetal astrocytes	Synaptosomes pHrodo red
Row 1705	LP01-302-10_0	SP190705_05	8389	8	1	High Control				2019-07-09			6208044	40679400	142	56	15.26	115.4	-0.4	39.4	Human fetal astrocytes	Synaptosomes pHrodo red
Row 1706	LP01-302-10_0	SP190705_05	8389	8	2	High Control				2019-07-09			4809794	34525208	142	52	13.93	105.3	-0.4	36.6	Human fetal astrocytes	Synaptosomes pHrodo red
Row 1707	LP01-302-10_0	SP190705_05	8389	8	3	Data	450	22.22	3.07	2019-07-09	STF-001191	STF-001191-1	4867199	31642484	124	49	15.38	116.3	13.2	39.5	Human fetal astrocytes	Synaptosomes pHrodo red
Row 1708	LP01-302-10_0	SP190705_05	8389	8	4	Data	450	22.22	8.94	2019-07-09	STF-001269	STF-001269-1	5653137	36672908	131	44	15.42	116.5	7.9	33.6	Human fetal astrocytes	Synaptosomes pHrodo red
Row 1709	LP01-302-10_0	SP190705_05	8389	8	5	Data	450	22.22	7.12	2019-07-09	STF-001192	STF-001192-1	6509293	36895792	136	61	17.64	133.4	4.1	44.9	Human fetal astrocytes	Synaptosomes pHrodo red
Row 1710	LP01-302-10_0	SP190705_05	8389	8	6	Data	450	22.22	15.28	2019-07-09	STF-001270	STF-001270-1	1044762	13507135	54	8	7.73	58.5	65.8	14.8	Human fetal astrocytes	Synaptosomes pHrodo red
Row 1711	LP01-302-10_0	SP190705_05	8389	8	7	Data	450	22.22	7.64	2019-07-09	STF-001193	STF-001193-1	6698152	42344396	152	56	15.82	119.6	-7.9	36.8	Human fetal astrocytes	Synaptosomes pHrodo red
Row 1712	LP01-302-10_0	SP190705_05	8389	8	8	Data	450	22.22	6.65	2019-07-09	STF-001271	STF-001271-1	5463986	35267228	130	50	15.49	117.1	8.6	38.5	Human fetal astrocytes	Synaptosomes pHrodo red
Row 1713	LP01-302-10_0	SP190705_05	8389	8	9	Data	450	22.22	8.97	2019-07-09	STF-001194	STF-001194-1	4840084	41980824	153	42	11.53	87.1	-8.6	27.5	Human fetal astrocytes	Synaptosomes pHrodo red
Row 1714	LP01-302-10_0	SP190705_05	8389	8	10	Data	450	22.22	10.59	2019-07-09	STF-001272	STF-001272-1	5722901	33218192	125	54	17.23	130.2	12.4	43.2	Human fetal astrocytes	Synaptosomes pHrodo red
Row 1715	LP01-302-10_0	SP190705_05	8389	8	11	Data	450	22.22	9.08	2019-07-09	STF-001195	STF-001195-1	4112863	34841192	143	39	11.8	89.2	-1.1	27.3	Human fetal astrocytes	Synaptosomes pHrodo red
Row 1716	LP01-302-10_0	SP190705_05	8389	8	12	Data	450	22.22	7.94	2019-07-09	STF-001273	STF-001273-1	4986432	35370508	135	49	14.1	106.6	4.9	36.3	Human fetal astrocytes	Synaptosomes pHrodo red
Row 1717	LP01-302-10_0	SP190705_05	8389	8	13	Data	450	22.22	6.78	2019-07-09	STF-001196	STF-001196-1	4230176	30599948	118	37	13.82	104.5	17.7	31.4	Human fetal astrocytes	Synaptosomes pHrodo red
Row 1718	LP01-302-10_0	SP190705_05	8389	8	14	Data	450	22.22	7.26	2019-07-09	STF-001274	STF-001274-1	3142020	28192342	114	26	11.14	84.2	20.7	22.8	Human fetal astrocytes	Synaptosomes pHrodo red
Row 1719	LP01-302-10_0	SP190705_05	8389	8	15	Data	450	22.22	8.57	2019-07-09	STF-001197	STF-001197-1	6165849	38643572	145	52	15.96	120.6	-2.6	35.9	Human fetal astrocytes	Synaptosomes pHrodo red
Row 1720	LP01-302-10_0	SP190705_05	8389	8	16	Data	450	22.22	7.05	2019-07-09	STF-001275	STF-001275-1	4414180	31978816	122	40	13.8	104.3	14.7	32.8	Human fetal astrocytes	Synaptosomes pHrodo red
Row 1721	LP01-302-10_0	SP190705_05	8389	8	17	Data	450	22.22	7.84	2019-07-09	STF-001198	STF-001198-1	4920843	35509716	137	39	13.86	104.7	3.4	28.5	Human fetal astrocytes	Synaptosomes pHrodo red
Row 1722	LP01-302-10_0	SP190705_05	8389	8	18	Data	450	22.22	10.61	2019-07-09	STF-001276	STF-001276-1	5005698	39466768	166	49	12.68	95.9	-18.4	29.5	Human fetal astrocytes	Synaptosomes pHrodo red
Row 1723	LP01-302-10_0	SP190705_05	8389	8	19	Data	450	22.22	2.27	2019-07-09	STF-001199	STF-001199-1	5528627	37138832	145	47	14.89	112.5	-2.6	32.4	Human fetal astrocytes	Synaptosomes pHrodo red
Row 1724	LP01-302-10_0	SP190705_05	8389	8	20	Data	450	22.22	9.9	2019-07-09	STF-001277	STF-001277-1	4153361	35092180	146	38	11.84	89.5	-3.4	26	Human fetal astrocytes	Synaptosomes pHrodo red
Row 1725	LP01-302-10_0	SP190705_05	8389	8	21	Data	450	22.22	5.6	2019-07-09	STF-001200	STF-001200-1	3929149	31372332	124	34	12.52	94.7	13.2	27.4	Human fetal astrocytes	Synaptosomes pHrodo red
Row 1726	LP01-302-10_0	SP190705_05	8389	8	22	Data	450	22.22	2.45	2019-07-09	STF-001278	STF-001278-1	3292427	30445852	117	26	10.81	81.7	18.4	22.2	Human fetal astrocytes	Synaptosomes pHrodo red
Row 1727	LP01-302-10_0	SP190705_05	8389	8	23	Positive Control				2019-07-09			0	19987440	71	0	0	0	53	0	Human fetal astrocytes	None
Row 1728	LP01-302-10_0	SP190705_05	8389	8	24	Low Control				2019-07-09			370523	2315069	7	4	16	121	101.1	57.1	Human fetal astrocytes	Synaptosomes pHrodo red
Row 1729	LP01-302-10_0	SP190705_05	8389	9	1	High Control				2019-07-09			4413695	32184152	135	44	13.71	103.7	4.9	32.6	Human fetal astrocytes	Synaptosomes pHrodo red
Row 1730	LP01-302-10_0	SP190705_05	8389	9	2	High Control				2019-07-09			5607444	32613436	119	53	17.19	130	16.9	44.5	Human fetal astrocytes	Synaptosomes pHrodo red
Row 1731	LP01-302-10_0	SP190705_05	8389	9	3	Data	450	22.22	2.87	2019-07-09	STF-001041	STF-001041-1	6490835	36240444	136	60	17.91	135.4	4.1	44.1	Human fetal astrocytes	Synaptosomes pHrodo red
Row 1732	LP01-302-10_0	SP190705_05	8389	9	4	Data	450	22.22	5.92	2019-07-09	STF-001121	STF-001121-1	6079714	36074392	138	55	16.85	127.4	2.6	39.9	Human fetal astrocytes	Synaptosomes pHrodo red
Row 1733	LP01-302-10_0	SP190705_05	8389	9	5	Data	450	22.22	15.04	2019-07-09	STF-001042	STF-001042-1	4666065	29743508	117	43	15.69	118.6	18.4	36.8	Human fetal astrocytes	Synaptosomes pHrodo red
Row 1734	LP01-302-10_0	SP190705_05	8389	9	6	Data	450	22.22	15.15	2019-07-09	STF-001122	STF-001122-1	2316724	24411284	94	25	9.49	71.7	35.7	26.6	Human fetal astrocytes	Synaptosomes pHrodo red
Row 1735	LP01-302-10_0	SP190705_05	8389	9	7	Data	450	22.22	3.03	2019-07-09	STF-001043	STF-001043-1	6223103	35367144	129	45	17.6	133	9.4	34.9	Human fetal astrocytes	Synaptosomes pHrodo red
Row 1736	LP01-302-10_0	SP190705_05	8389	9	8	Data	450	22.22	5.94	2019-07-09	STF-001123	STF-001123-1	4400699	30739468	126	44	14.32	108.2	11.7	34.9	Human fetal astrocytes	Synaptosomes pHrodo red
Row 1737	LP01-302-10_0	SP190705_05	8389	9	9	Data	450	22.22	4.85	2019-07-09	STF-001044	STF-001044-1	5786979	33050492	132	50	17.51	132.4	7.1	37.9	Human fetal astrocytes	Synaptosomes pHrodo red
Row 1738	LP01-302-10_0	SP190705_05	8389	9	10	Data	450	22.22	5.16	2019-07-09	STF-001124	STF-001124-1	4793815	32553296	129	41	14.73	111.3	9.4	31.8	Human fetal astrocytes	Synaptosomes pHrodo red
Row 1739	LP01-302-10_0	SP190705_05	8389	9	11	Data	450	22.22	6.66	2019-07-09	STF-001045	STF-001045-1	3400983	34177072	143	27	9.95	75.2	-1.1	18.9	Human fetal astrocytes	Synaptosomes pHrodo red
Row 1740	LP01-302-10_0	SP190705_05	8389	9	12	Data	450	22.22	6.32	2019-07-09	STF-001125	STF-001125-1	5968243	41518032	152	49	14.38	108.7	-7.9	32.2	Human fetal astrocytes	Synaptosomes pHrodo red
Row 1741	LP01-302-10_0	SP190705_05	8389	9	13	Data	450	22.22	8.94	2019-07-09	STF-001046	STF-001046-1	5131248	36207296	140	45	14.17	107.1	1.1	32.1	Human fetal astrocytes	Synaptosomes pHrodo red
Row 1742	LP01-302-10_0	SP190705_05	8389	9	14	Data	450	22.22	7.17	2019-07-09	STF-001126	STF-001126-1	3293113	34110052	150	33	9.65	73	-6.4	22	Human fetal astrocytes	Synaptosomes pHrodo red
Row 1743	LP01-302-10_0	SP190705_05	8389	9	15	Data	450	22.22	7.6	2019-07-09	STF-001047	STF-001047-1	4390461	40604076	148	36	10.81	81.7	-4.9	24.3	Human fetal astrocytes	Synaptosomes pHrodo red
Row 1744	LP01-302-10_0	SP190705_05	8389	9	16	Data	450	22.22	6.49	2019-07-09	STF-001127	STF-001127-1	4354992	33867352	124	36	12.86	97.2	13.2	29	Human fetal astrocytes	Synaptosomes pHrodo red
Row 1745	LP01-302-10_0	SP190705_05	8389	9	17	Data	450	22.22	6.66	2019-07-09	STF-001048	STF-001048-1	3210260	32311764	120	24	9.94	75.1	16.2	20	Human fetal astrocytes	Synaptosomes pHrodo red
Row 1746	LP01-302-10_0	SP190705_05	8389	9	18	Data	450	22.22	5.3	2019-07-09	STF-001128	STF-001128-1	4442485	38644244	160	42	11.5	86.9	-13.9	26.3	Human fetal astrocytes	Synaptosomes pHrodo red
Row 1747	LP01-302-10_0	SP190705_05	8389	9	19	Data	450	22.22	5.25	2019-07-09	STF-001049	STF-001049-1	5087062	38364296	149	39	13.26	100.2	-5.6	26.2	Human fetal astrocytes	Synaptosomes pHrodo red
Row 1748	LP01-302-10_0	SP190705_05	8389	9	20	Data	450	22.22	8.13	2019-07-09	STF-001129	STF-001129-1	2652527	27957504	109	22	9.49	71.7	24.4	20.2	Human fetal astrocytes	Synaptosomes pHrodo red
Row 1749	LP01-302-10_0	SP190705_05	8389	9	21	Data	450	22.22	5.47	2019-07-09	STF-001050	STF-001050-1	4918499	33030500	131	47	14.89	112.6	7.9	35.9	Human fetal astrocytes	Synaptosomes pHrodo red
Row 1750	LP01-302-10_0	SP190705_05	8389	9	22	Data	450	22.22	9.91	2019-07-09	STF-001130	STF-001130-1	4137128	29186224	126	36	14.17	107.1	11.7	28.6	Human fetal astrocytes	Synaptosomes pHrodo red
Row 1751	LP01-302-10_0	SP190705_05	8389	9	23	Positive Control				2019-07-09			0	19320824	69	0	0	0	54.5	0	Human fetal astrocytes	None
Row 1752	LP01-302-10_0	SP190705_05	8389	9	24	Low Control				2019-07-09			489759	2636093	10	7	18.58	140.4	98.9	70	Human fetal astrocytes	Synaptosomes pHrodo red
Row 1753	LP01-302-10_0	SP190705_05	8389	10	1	High Control				2019-07-09			5321774	36120088	141	46	14.73	111.4	0.4	32.6	Human fetal astrocytes	Synaptosomes pHrodo red
Row 1754	LP01-302-10_0	SP190705_05	8389	10	2	High Control				2019-07-09			5691321	37160872	144	54	15.32	115.8	-1.9	37.5	Human fetal astrocytes	Synaptosomes pHrodo red
Row 1755	LP01-302-10_0	SP190705_05	8389	10	3	Data	450	22.22	9.67	2019-07-09	STF-001201	STF-001201-1	3871781	26469196	106	41	14.63	110.6	26.7	38.7	Human fetal astrocytes	Synaptosomes pHrodo red
Row 1756	LP01-302-10_0	SP190705_05	8389	10	4	Data	450	22.22	10.64	2019-07-09	STF-001279	STF-001279-1	5179610	33427672	120	39	15.49	117.1	16.2	32.5	Human fetal astrocytes	Synaptosomes pHrodo red
Row 1757	LP01-302-10_0	SP190705_05	8389	10	5	Data	450	22.22	7.03	2019-07-09	STF-001202	STF-001202-1	3033149	28676164	113	26	10.58	80	21.4	23	Human fetal astrocytes	Synaptosomes pHrodo red
Row 1758	LP01-302-10_0	SP190705_05	8389	10	6	Data	450	22.22	8.74	2019-07-09	STF-001280	STF-001280-1	5332580	36030928	129	49	14.8	111.9	9.4	38	Human fetal astrocytes	Synaptosomes pHrodo red
Row 1759	LP01-302-10_0	SP190705_05	8389	10	7	Data	450	22.22	3.48	2019-07-09	STF-001203	STF-001203-1	5356367	41305548	157	50	12.97	98	-11.7	31.8	Human fetal astrocytes	Synaptosomes pHrodo red
Row 1760	LP01-302-10_0	SP190705_05	8389	10	8	Data	450	22.22	9.3	2019-07-09	STF-001281	STF-001281-1	6036762	38456944	159	57	15.7	118.7	-13.2	35.8	Human fetal astrocytes	Synaptosomes pHrodo red
Row 1761	LP01-302-10_0	SP190705_05	8389	10	9	Data	450	22.22	6.19	2019-07-09	STF-001204	STF-001204-1	4494551	31331320	129	39	14.35	108.4	9.4	30.2	Human fetal astrocytes	Synaptosomes pHrodo red
Row 1762	LP01-302-10_0	SP190705_05	8389	10	10	Data	450	22.22	8.05	2019-07-09	STF-078950	STF-078950-2	4825376	33385598	136	43	14.45	109.3	4.1	31.6	Human fetal astrocytes	Synaptosomes pHrodo red
Row 1763	LP01-302-10_0	SP190705_05	8389	10	11	Data	450	22.22	4.97	2019-07-09	STF-001205	STF-001205-1	4506689	32657568	125	39	13.8	104.3	12.4	31.2	Human fetal astrocytes	Synaptosomes pHrodo red
Row 1764	LP01-302-10_0	SP190705_05	8389	10	12	Data	450	22.22	3.92	2019-07-09	STF-001282	STF-001282-1	3711282	33786148	151	41	10.98	83	-7.1	27.2	Human fetal astrocytes	Synaptosomes pHrodo red
Row 1765	LP01-302-10_0	SP190705_05	8389	10	13	Data	450	22.22	10.19	2019-07-09	STF-001206	STF-001206-1	4546503	36453660	146	39	12.47	94.3	-3.4	26.7	Human fetal astrocytes	Synaptosomes pHrodo red
Row 1766	LP01-302-10_0	SP190705_05	8389	10	14	Data	450	22.22	4.44	2019-07-09	STF-001283	STF-001283-1	4630745	37730548	169	48	12.27	92.8	-20.7	28.4	Human fetal astrocytes	Synaptosomes pHrodo red
Row 1767	LP01-302-10_0	SP190705_05	8389	10	15	Data	450	22.22	7.7	2019-07-09	STF-001207	STF-001207-1	5317660	37010260	142	44	14.37	108.6	-0.4	31	Human fetal astrocytes	Synaptosomes pHrodo red
Row 1768	LP01-302-10_0	SP190705_05	8389	10	16	Data	450	22.22	8.31	2019-07-09	STF-001284	STF-001284-1	5563851	33180562	126	41	16.77	126.7	11.7	32.5	Human fetal astrocytes	Synaptosomes pHrodo red
Row 1769	LP01-302-10_0	SP190705_05	8389	10	17	Data	450	22.22	4	2019-07-09	STF-001208	STF-001208-1	5518670	37853568	143	43	14.58	110.2	-1.1	30.1	Human fetal astrocytes	Synaptosomes pHrodo red
Row 1770	LP01-302-10_0	SP190705_05	8389	10	18	Data	450	22.22	7.61	2019-07-09	STF-001285	STF-001285-1	3794763	32603228	128	29	11.64	88	10.2	22.7	Human fetal astrocytes	Synaptosomes pHrodo red
Row 1771	LP01-302-10_0	SP190705_05	8389	10	19	Data	450	22.22	8.03	2019-07-09	STF-001209	STF-001209-1	3062846	36925128	140	26	8.29	62.7	1.1	18.6	Human fetal astrocytes	Synaptosomes pHrodo red
Row 1772	LP01-302-10_0	SP190705_05	8389	10	20	Data	450	22.22	7.76	2019-07-09	STF-001286	STF-001286-1	4601933	34759636	152	44	13.24	100.1	-7.9	28.9	Human fetal astrocytes	Synaptosomes pHrodo red
Row 1773	LP01-302-10_0	SP190705_05	8389	10	21	Data	450	22.22	5.67	2019-07-09	STF-001210	STF-001210-1	4812202	34496228	146	42	13.95	105.4	-3.4	28.8	Human fetal astrocytes	Synaptosomes pHrodo red
Row 1774	LP01-302-10_0	SP190705_05	8389	10	22	Data	450	22.22	7.37	2019-07-09	STF-001287	STF-001287-1	49425	17615176	62	1	0.28	2.1	59.8	1.6	Human fetal astrocytes	Synaptosomes pHrodo red
Row 1775	LP01-302-10_0	SP190705_05	8389	10	23	Positive Control				2019-07-09			0	19789432	68	0	0	0	55.3	0	Human fetal astrocytes	None
Row 1776	LP01-302-10_0	SP190705_05	8389	10	24	Low Control				2019-07-09			507575	2918844	8	5	17.39	131.4	100.4	62.5	Human fetal astrocytes	Synaptosomes pHrodo red
Row 1777	LP01-302-10_0	SP190705_05	8389	11	1	High Control				2019-07-09			6479117	34860912	121	59	18.59	140.5	15.4	48.8	Human fetal astrocytes	Synaptosomes pHrodo red
Row 1778	LP01-302-10_0	SP190705_05	8389	11	2	High Control				2019-07-09			4475627	34013600	127	40	13.16	99.5	10.9	31.5	Human fetal astrocytes	Synaptosomes pHrodo red
Row 1779	LP01-302-10_0	SP190705_05	8389	11	3	Data	450	22.22	4.18	2019-07-09	STF-001051	STF-001051-1	4424880	34576224	131	38	12.8	96.7	7.9	29	Human fetal astrocytes	Synaptosomes pHrodo red
Row 1780	LP01-302-10_0	SP190705_05	8389	11	4	Data	450	22.22	6.5	2019-07-09	STF-001131	STF-001131-1	4935597	37399820	147	51	13.2	99.8	-4.1	34.7	Human fetal astrocytes	Synaptosomes pHrodo red
Row 1781	LP01-302-10_0	SP190705_05	8389	11	5	Data	450	22.22	8.14	2019-07-09	STF-001052	STF-001052-1	6093520	36260844	140	56	16.8	127	1.1	40	Human fetal astrocytes	Synaptosomes pHrodo red
Row 1782	LP01-302-10_0	SP190705_05	8389	11	6	Data	450	22.22	5.33	2019-07-09	STF-001132	STF-001132-1	5949799	37924928	149	57	15.69	118.6	-5.6	38.3	Human fetal astrocytes	Synaptosomes pHrodo red
Row 1783	LP01-302-10_0	SP190705_05	8389	11	7	Data	450	22.22	7.09	2019-07-09	STF-001053	STF-001053-1	3365694	30856188	123	31	10.91	82.4	13.9	25.2	Human fetal astrocytes	Synaptosomes pHrodo red
Row 1784	LP01-302-10_0	SP190705_05	8389	11	8	Data	450	22.22	2.96	2019-07-09	STF-001133	STF-001133-1	5081649	34759404	135	47	14.62	110.5	4.9	34.8	Human fetal astrocytes	Synaptosomes pHrodo red
Row 1785	LP01-302-10_0	SP190705_05	8389	11	9	Data	450	22.22	9.39	2019-07-09	STF-001054	STF-001054-1	4999551	29147564	106	48	17.15	129.7	26.7	45.3	Human fetal astrocytes	Synaptosomes pHrodo red
Row 1786	LP01-302-10_0	SP190705_05	8389	11	10	Data	450	22.22	2.58	2019-07-09	STF-001134	STF-001134-1	2798053	31079976	145	29	9	68.1	-2.6	20	Human fetal astrocytes	Synaptosomes pHrodo red
Row 1787	LP01-302-10_0	SP190705_05	8389	11	11	Data	450	22.22	5.69	2019-07-09	STF-001055	STF-001055-1	4686392	36024000	135	37	13.01	98.3	4.9	27.4	Human fetal astrocytes	Synaptosomes pHrodo red
Row 1788	LP01-302-10_0	SP190705_05	8389	11	12	Data	450	22.22	7.47	2019-07-09	STF-001135	STF-001135-1	5048120	34173552	143	48	14.77	111.7	-1.1	33.6	Human fetal astrocytes	Synaptosomes pHrodo red
Row 1789	LP01-302-10_0	SP190705_05	8389	11	13	Data	450	22.22	2.98	2019-07-09	STF-001056	STF-001056-1	4950255	33640352	134	40	14.72	111.2	5.6	29.9	Human fetal astrocytes	Synaptosomes pHrodo red
Row 1790	LP01-302-10_0	SP190705_05	8389	11	14	Data	450	22.22	5.78	2019-07-09	STF-001136	STF-001136-1	4568754	33519148	133	39	13.63	103	6.4	29.3	Human fetal astrocytes	Synaptosomes pHrodo red
Row 1791	LP01-302-10_0	SP190705_05	8389	11	15	Data	450	22.22	10.35	2019-07-09	STF-001057	STF-001057-1	3922123	34831896	133	31	11.26	85.1	6.4	23.3	Human fetal astrocytes	Synaptosomes pHrodo red
Row 1792	LP01-302-10_0	SP190705_05	8389	11	16	Data	450	22.22	7.43	2019-07-09	STF-001137	STF-001137-1	4449609	35176212	135	36	12.65	95.6	4.9	26.7	Human fetal astrocytes	Synaptosomes pHrodo red
Row 1793	LP01-302-10_0	SP190705_05	8389	11	17	Data	450	22.22	4.39	2019-07-09	STF-001058	STF-001058-1	5118324	36736088	145	46	13.93	105.3	-2.6	31.7	Human fetal astrocytes	Synaptosomes pHrodo red
Row 1794	LP01-302-10_0	SP190705_05	8389	11	18	Data	450	22.22	2.83	2019-07-09	STF-001138	STF-001138-1	4107782	32800672	137	38	12.52	94.7	3.4	27.7	Human fetal astrocytes	Synaptosomes pHrodo red
Row 1795	LP01-302-10_0	SP190705_05	8389	11	19	Data	450	22.22	7.68	2019-07-09	STF-001059	STF-001059-1	3979635	31482784	122	33	12.64	95.5	14.7	27	Human fetal astrocytes	Synaptosomes pHrodo red
Row 1796	LP01-302-10_0	SP190705_05	8389	11	20	Data	450	22.22	5.07	2019-07-09	STF-001139	STF-001139-1	4258872	33232804	137	39	12.82	96.9	3.4	28.5	Human fetal astrocytes	Synaptosomes pHrodo red
Row 1797	LP01-302-10_0	SP190705_05	8389	11	21	Data	450	22.22	5.07	2019-07-09	STF-001060	STF-001060-1	4061501	36571392	146	36	11.11	83.9	-3.4	24.7	Human fetal astrocytes	Synaptosomes pHrodo red
Row 1798	LP01-302-10_0	SP190705_05	8389	11	22	Data	450	22.22	11.54	2019-07-09	STF-001140	STF-001140-1	2666151	37478380	150	22	7.11	53.8	-6.4	14.7	Human fetal astrocytes	Synaptosomes pHrodo red
Row 1799	LP01-302-10_0	SP190705_05	8389	11	23	Positive Control				2019-07-09			0	22677722	83	0	0	0	44	0	Human fetal astrocytes	None
Row 1800	LP01-302-10_0	SP190705_05	8389	11	24	Low Control				2019-07-09			374013	4079188	9	6	9.17	69.3	99.6	66.7	Human fetal astrocytes	Synaptosomes pHrodo red
Row 1801	LP01-302-10_0	SP190705_05	8389	12	1	High Control				2019-07-09			4643309	37840896	141	46	12.27	92.8	0.4	32.6	Human fetal astrocytes	Synaptosomes pHrodo red
Row 1802	LP01-302-10_0	SP190705_05	8389	12	2	High Control				2019-07-09			4973600	37440704	155	50	13.28	100.4	-10.2	32.3	Human fetal astrocytes	Synaptosomes pHrodo red
Row 1803	LP01-302-10_0	SP190705_05	8389	12	3	Data	450	22.22	7.92	2019-07-09	STF-001211	STF-001211-1	4072766	32708412	126	36	12.45	94.1	11.7	28.6	Human fetal astrocytes	Synaptosomes pHrodo red
Row 1804	LP01-302-10_0	SP190705_05	8389	12	4	Data	450	22.22	9.39	2019-07-09	STF-001288	STF-001288-1	817245	30718650	108	7	2.66	20.1	25.2	6.5	Human fetal astrocytes	Synaptosomes pHrodo red
Row 1805	LP01-302-10_0	SP190705_05	8389	12	5	Data	450	22.22	6.82	2019-07-09	STF-089963	STF-089963-2	5290418	36334180	143	52	14.56	110.1	-1.1	36.4	Human fetal astrocytes	Synaptosomes pHrodo red
Row 1806	LP01-302-10_0	SP190705_05	8389	12	6	Data	450	22.22	5.25	2019-07-09	STF-001289	STF-001289-1	4409657	37887560	147	38	11.64	88	-4.1	25.9	Human fetal astrocytes	Synaptosomes pHrodo red
Row 1807	LP01-302-10_0	SP190705_05	8389	12	7	Data	450	22.22	8.72	2019-07-09	STF-001212	STF-001212-1	4909912	40784584	164	48	12.04	91	-16.9	29.3	Human fetal astrocytes	Synaptosomes pHrodo red
Row 1808	LP01-302-10_0	SP190705_05	8389	12	8	Data	450	22.22	5.61	2019-07-09	STF-001290	STF-001290-1	4536021	37085144	148	45	12.23	92.5	-4.9	30.4	Human fetal astrocytes	Synaptosomes pHrodo red
Row 1809	LP01-302-10_0	SP190705_05	8389	12	9	Data	450	22.22	7.66	2019-07-09	STF-001213	STF-001213-1	4322736	34760776	137	38	12.44	94	3.4	27.7	Human fetal astrocytes	Synaptosomes pHrodo red
Row 1810	LP01-302-10_0	SP190705_05	8389	12	10	Data	450	22.22	6.7	2019-07-09	STF-001291	STF-001291-1	4608047	34805296	134	39	13.24	100.1	5.6	29.1	Human fetal astrocytes	Synaptosomes pHrodo red
Row 1811	LP01-302-10_0	SP190705_05	8389	12	11	Data	450	22.22	10.7	2019-07-09	STF-001214	STF-001214-1	264848	7093943	37	3	3.73	28.2	78.6	8.1	Human fetal astrocytes	Synaptosomes pHrodo red
Row 1812	LP01-302-10_0	SP190705_05	8389	12	12	Data	450	22.22	10.35	2019-07-09	STF-001292	STF-001292-1	4226962	32990656	137	40	12.81	96.8	3.4	29.2	Human fetal astrocytes	Synaptosomes pHrodo red
Row 1813	LP01-302-10_0	SP190705_05	8389	12	13	Data	450	22.22	10.12	2019-07-09	STF-001215	STF-001215-1	3438744	32173204	137	34	10.69	80.8	3.4	24.8	Human fetal astrocytes	Synaptosomes pHrodo red
Row 1814	LP01-302-10_0	SP190705_05	8389	12	14	Data	450	22.22	11.46	2019-07-09	STF-001293	STF-001293-1	4441114	35267328	146	41	12.59	95.2	-3.4	28.1	Human fetal astrocytes	Synaptosomes pHrodo red
Row 1815	LP01-302-10_0	SP190705_05	8389	12	15	Data	450	22.22	7.17	2019-07-09	STF-001216	STF-001216-1	3632680	33547020	132	30	10.83	81.9	7.1	22.7	Human fetal astrocytes	Synaptosomes pHrodo red
Row 1816	LP01-302-10_0	SP190705_05	8389	12	16	Data	450	22.22	5	2019-07-09	STF-001294	STF-001294-1	3827986	29151540	131	37	13.13	99.3	7.9	28.2	Human fetal astrocytes	Synaptosomes pHrodo red
Row 1817	LP01-302-10_0	SP190705_05	8389	12	17	Data	450	22.22	8.21	2019-07-09	STF-001217	STF-001217-1	5040289	37541168	148	46	13.43	101.5	-4.9	31.1	Human fetal astrocytes	Synaptosomes pHrodo red
Row 1818	LP01-302-10_0	SP190705_05	8389	12	18	Data	450	22.22	4.07	2019-07-09	STF-001295	STF-001295-1	3566127	35191640	143	36	10.13	76.6	-1.1	25.2	Human fetal astrocytes	Synaptosomes pHrodo red
Row 1819	LP01-302-10_0	SP190705_05	8389	12	19	Data	450	22.22	6.45	2019-07-09	STF-001218	STF-001218-1	3411553	29119574	123	32	11.72	88.6	13.9	26	Human fetal astrocytes	Synaptosomes pHrodo red
Row 1820	LP01-302-10_0	SP190705_05	8389	12	20	Data	450	22.22	6.96	2019-07-09	STF-001296	STF-001296-1	5021076	38487208	146	42	13.05	98.6	-3.4	28.8	Human fetal astrocytes	Synaptosomes pHrodo red
Row 1821	LP01-302-10_0	SP190705_05	8389	12	21	Data	450	22.22	7.7	2019-07-09	STF-001219	STF-001219-1	3230240	33917132	134	30	9.52	72	5.6	22.4	Human fetal astrocytes	Synaptosomes pHrodo red
Row 1822	LP01-302-10_0	SP190705_05	8389	12	22	Data	450	22.22	5.49	2019-07-09	STF-001297	STF-001297-1	3526837	33650744	131	28	10.48	79.2	7.9	21.4	Human fetal astrocytes	Synaptosomes pHrodo red
Row 1823	LP01-302-10_0	SP190705_05	8389	12	23	Positive Control				2019-07-09			0	21001380	78	0	0	0	47.7	0	Human fetal astrocytes	None
Row 1824	LP01-302-10_0	SP190705_05	8389	12	24	Low Control				2019-07-09			492628	4226480	10	8	11.66	88.1	98.9	80	Human fetal astrocytes	Synaptosomes pHrodo red
Row 1825	LP01-302-10_0	SP190705_05	8389	13	1	High Control				2019-07-09			6068518	45316536	155	49	13.39	101.2	-10.2	31.6	Human fetal astrocytes	Synaptosomes pHrodo red
Row 1826	LP01-302-10_0	SP190705_05	8389	13	2	High Control				2019-07-09			5842874	35372768	145	53	16.52	124.9	-2.6	36.6	Human fetal astrocytes	Synaptosomes pHrodo red
Row 1827	LP01-302-10_0	SP190705_05	8389	13	3	Data	450	22.22	4.37	2019-07-09	STF-001061	STF-001061-1	3410428	31846682	135	36	10.71	80.9	4.9	26.7	Human fetal astrocytes	Synaptosomes pHrodo red
Row 1828	LP01-302-10_0	SP190705_05	8389	13	4	Data	450	22.22	2.56	2019-07-09	STF-001141	STF-001141-1	4582283	36059248	131	41	12.71	96.1	7.9	31.3	Human fetal astrocytes	Synaptosomes pHrodo red
Row 1829	LP01-302-10_0	SP190705_05	8389	13	5	Data	450	22.22	6.01	2019-07-09	STF-001062	STF-001062-1	7128843	39811680	155	63	17.91	135.4	-10.2	40.6	Human fetal astrocytes	Synaptosomes pHrodo red
Row 1830	LP01-302-10_0	SP190705_05	8389	13	6	Data	450	22.22	5.81	2019-07-09	STF-001142	STF-001142-1	5203330	41812904	146	47	12.44	94.1	-3.4	32.2	Human fetal astrocytes	Synaptosomes pHrodo red
Row 1831	LP01-302-10_0	SP190705_05	8389	13	7	Data	450	22.22	4.72	2019-07-09	STF-001063	STF-001063-1	4093241	37627088	154	39	10.88	82.2	-9.4	25.3	Human fetal astrocytes	Synaptosomes pHrodo red
Row 1832	LP01-302-10_0	SP190705_05	8389	13	8	Data	450	22.22	13.26	2019-07-09	STF-001143	STF-001143-1	4258934	33285510	152	40	12.8	96.7	-7.9	26.3	Human fetal astrocytes	Synaptosomes pHrodo red
Row 1833	LP01-302-10_0	SP190705_05	8389	13	9	Data	450	22.22	4.07	2019-07-09	STF-001064	STF-001064-1	5798617	33322130	143	51	17.4	131.5	-1.1	35.7	Human fetal astrocytes	Synaptosomes pHrodo red
Row 1834	LP01-302-10_0	SP190705_05	8389	13	10	Data	450	22.22	6.45	2019-07-09	STF-001144	STF-001144-1	3953998	43852976	176	39	9.02	68.2	-25.9	22.2	Human fetal astrocytes	Synaptosomes pHrodo red
Row 1835	LP01-302-10_0	SP190705_05	8389	13	11	Data	450	22.22	6.01	2019-07-09	STF-001065	STF-001065-1	3912424	39351028	139	26	9.94	75.2	1.9	18.7	Human fetal astrocytes	Synaptosomes pHrodo red
Row 1836	LP01-302-10_0	SP190705_05	8389	13	12	Data	450	22.22	8.72	2019-07-09	STF-001145	STF-001145-1	5994481	36629328	147	51	16.37	123.7	-4.1	34.7	Human fetal astrocytes	Synaptosomes pHrodo red
Row 1837	LP01-302-10_0	SP190705_05	8389	13	13	Data	450	22.22	3.58	2019-07-09	STF-001066	STF-001066-1	4624412	29872808	121	43	15.48	117	15.4	35.5	Human fetal astrocytes	Synaptosomes pHrodo red
Row 1838	LP01-302-10_0	SP190705_05	8389	13	14	Data	450	22.22	5.92	2019-07-09	STF-001146	STF-001146-1	5516552	41617996	157	52	13.26	100.2	-11.7	33.1	Human fetal astrocytes	Synaptosomes pHrodo red
Row 1839	LP01-302-10_0	SP190705_05	8389	13	15	Data	450	22.22	3.76	2019-07-09	STF-001067	STF-001067-1	5056998	32781160	146	46	15.43	116.6	-3.4	31.5	Human fetal astrocytes	Synaptosomes pHrodo red
Row 1840	LP01-302-10_0	SP190705_05	8389	13	16	Data	450	22.22	6.77	2019-07-09	STF-001147	STF-001147-1	4769596	36435452	157	45	13.09	98.9	-11.7	28.7	Human fetal astrocytes	Synaptosomes pHrodo red
Row 1841	LP01-302-10_0	SP190705_05	8389	13	17	Data	450	22.22	6.72	2019-07-09	STF-001068	STF-001068-1	4198097	38668928	142	36	10.86	82.1	-0.4	25.4	Human fetal astrocytes	Synaptosomes pHrodo red
Row 1842	LP01-302-10_0	SP190705_05	8389	13	18	Data	450	22.22	8.88	2019-07-09	STF-001148	STF-001148-1	4727902	31026756	144	43	15.24	115.2	-1.9	29.9	Human fetal astrocytes	Synaptosomes pHrodo red
Row 1843	LP01-302-10_0	SP190705_05	8389	13	19	Data	450	22.22	8.39	2019-07-09	STF-001069	STF-001069-1	3288035	36461688	146	23	9.02	68.2	-3.4	15.8	Human fetal astrocytes	Synaptosomes pHrodo red
Row 1844	LP01-302-10_0	SP190705_05	8389	13	20	Data	450	22.22	17.45	2019-07-09	STF-001149	STF-001149-1	4098513	30678404	135	33	13.36	101	4.9	24.4	Human fetal astrocytes	Synaptosomes pHrodo red
Row 1845	LP01-302-10_0	SP190705_05	8389	13	21	Data	450	22.22	4.62	2019-07-09	STF-001070	STF-001070-1	3503499	32343012	137	29	10.83	81.9	3.4	21.2	Human fetal astrocytes	Synaptosomes pHrodo red
Row 1846	LP01-302-10_0	SP190705_05	8389	13	22	Data	450	22.22	7.05	2019-07-09	STF-001150	STF-001150-1	3632747	38280684	154	36	9.49	71.7	-9.4	23.4	Human fetal astrocytes	Synaptosomes pHrodo red
Row 1847	LP01-302-10_0	SP190705_05	8389	13	23	Positive Control				2019-07-09			0	19102216	64	0	0	0	58.3	0	Human fetal astrocytes	None
Row 1848	LP01-302-10_0	SP190705_05	8389	13	24	Low Control				2019-07-09			279021	1908476	4	4	14.62	110.5	103.4	100	Human fetal astrocytes	Synaptosomes pHrodo red
Row 1849	LP01-302-10_0	SP190705_05	8389	14	1	High Control				2019-07-09			5049541	38429232	134	46	13.14	99.3	5.6	34.3	Human fetal astrocytes	Synaptosomes pHrodo red
Row 1850	LP01-302-10_0	SP190705_05	8389	14	2	High Control				2019-07-09			5040407	37023972	148	45	13.61	102.9	-4.9	30.4	Human fetal astrocytes	Synaptosomes pHrodo red
Row 1851	LP01-302-10_0	SP190705_05	8389	14	3	Data	450	22.22	4.94	2019-07-09	STF-001220	STF-001220-1	6175938	38461892	156	52	16.06	121.4	-10.9	33.3	Human fetal astrocytes	Synaptosomes pHrodo red
Row 1852	LP01-302-10_0	SP190705_05	8389	14	4	Data	450	22.22	9.27	2019-07-09	STF-001298	STF-001298-1	5425847	37509656	151	50	14.47	109.3	-7.1	33.1	Human fetal astrocytes	Synaptosomes pHrodo red
Row 1853	LP01-302-10_0	SP190705_05	8389	14	5	Data	450	22.22	8.96	2019-07-09	STF-001221	STF-001221-1	5392605	43410784	161	44	12.42	93.9	-14.7	27.3	Human fetal astrocytes	Synaptosomes pHrodo red
Row 1854	LP01-302-10_0	SP190705_05	8389	14	6	Data	450	22.22	4.83	2019-07-09	STF-001299	STF-001299-1	5351319	34955032	146	51	15.31	115.7	-3.4	34.9	Human fetal astrocytes	Synaptosomes pHrodo red
Row 1855	LP01-302-10_0	SP190705_05	8389	14	7	Data	450	22.22	9.38	2019-07-09	STF-001222	STF-001222-1	5953000	40337116	151	47	14.76	111.6	-7.1	31.1	Human fetal astrocytes	Synaptosomes pHrodo red
Row 1856	LP01-302-10_0	SP190705_05	8389	14	8	Data	450	22.22	6.93	2019-07-09	STF-001300	STF-001300-1	4766333	35194716	122	40	13.54	102.4	14.7	32.8	Human fetal astrocytes	Synaptosomes pHrodo red
Row 1857	LP01-302-10_0	SP190705_05	8389	14	9	Data	450	22.22	9.21	2019-07-09	STF-001223	STF-001223-1	3552280	30830420	136	38	11.52	87.1	4.1	27.9	Human fetal astrocytes	Synaptosomes pHrodo red
Row 1858	LP01-302-10_0	SP190705_05	8389	14	10	Data	450	22.22	4.37	2019-07-09	STF-001301	STF-001301-1	4553076	35539084	157	39	12.81	96.8	-11.7	24.8	Human fetal astrocytes	Synaptosomes pHrodo red
Row 1859	LP01-302-10_0	SP190705_05	8389	14	11	Data	450	22.22	8.84	2019-07-09	STF-001224	STF-001224-1	3629235	32825344	135	33	11.06	83.6	4.9	24.4	Human fetal astrocytes	Synaptosomes pHrodo red
Row 1860	LP01-302-10_0	SP190705_05	8389	14	12	Data	450	22.22	5.7	2019-07-09	STF-001302	STF-001302-1	6377187	32375622	137	60	19.7	148.9	3.4	43.8	Human fetal astrocytes	Synaptosomes pHrodo red
Row 1861	LP01-302-10_0	SP190705_05	8389	14	13	Data	450	22.22	7.47	2019-07-09	STF-001225	STF-001225-1	3944936	37175568	137	34	10.61	80.2	3.4	24.8	Human fetal astrocytes	Synaptosomes pHrodo red
Row 1862	LP01-302-10_0	SP190705_05	8389	14	14	Data	450	22.22	5.39	2019-07-09	STF-001303	STF-001303-1	4891238	35257900	146	40	13.87	104.9	-3.4	27.4	Human fetal astrocytes	Synaptosomes pHrodo red
Row 1863	LP01-302-10_0	SP190705_05	8389	14	15	Data	450	22.22	6.76	2019-07-09	STF-001226	STF-001226-1	4781795	38599848	160	42	12.39	93.6	-13.9	26.3	Human fetal astrocytes	Synaptosomes pHrodo red
Row 1864	LP01-302-10_0	SP190705_05	8389	14	16	Data	450	22.22	7.81	2019-07-09	STF-001304	STF-001304-1	2965097	32482986	121	25	9.13	69	15.4	20.7	Human fetal astrocytes	Synaptosomes pHrodo red
Row 1865	LP01-302-10_0	SP190705_05	8389	14	17	Data	450	22.22	4.32	2019-07-09	STF-001227	STF-001227-1	4474632	31768004	134	40	14.09	106.5	5.6	29.9	Human fetal astrocytes	Synaptosomes pHrodo red
Row 1866	LP01-302-10_0	SP190705_05	8389	14	18	Data	450	22.22	7.45	2019-07-09	STF-001305	STF-001305-1	4129373	32677468	147	40	12.64	95.5	-4.1	27.2	Human fetal astrocytes	Synaptosomes pHrodo red
Row 1867	LP01-302-10_0	SP190705_05	8389	14	19	Data	450	22.22	6.15	2019-07-09	STF-001228	STF-001228-1	3930313	34499728	130	32	11.39	86.1	8.6	24.6	Human fetal astrocytes	Synaptosomes pHrodo red
Row 1868	LP01-302-10_0	SP190705_05	8389	14	20	Data	450	22.22	5.83	2019-07-09	STF-001306	STF-001306-1	3224576	33244840	136	28	9.7	73.3	4.1	20.6	Human fetal astrocytes	Synaptosomes pHrodo red
Row 1869	LP01-302-10_0	SP190705_05	8389	14	21	Data	450	22.22	8.25	2019-07-09	STF-001229	STF-001229-1	4035198	33522806	156	34	12.04	91	-10.9	21.8	Human fetal astrocytes	Synaptosomes pHrodo red
Row 1870	LP01-302-10_0	SP190705_05	8389	14	22	Data	450	22.22	8.88	2019-07-09	STF-001307	STF-001307-1	3314951	28579750	122	32	11.6	87.7	14.7	26.2	Human fetal astrocytes	Synaptosomes pHrodo red
Row 1871	LP01-302-10_0	SP190705_05	8389	14	23	Positive Control				2019-07-09			0	18052946	76	0	0	0	49.2	0	Human fetal astrocytes	None
Row 1872	LP01-302-10_0	SP190705_05	8389	14	24	Low Control				2019-07-09			104336	1641293	5	2	6.36	48.1	102.6	40	Human fetal astrocytes	Synaptosomes pHrodo red
Row 1873	LP01-302-10_0	SP190705_05	8389	15	1	High Control				2019-07-09			4335851	31905762	111	45	13.59	102.7	22.9	40.5	Human fetal astrocytes	Synaptosomes pHrodo red
Row 1874	LP01-302-10_0	SP190705_05	8389	15	2	High Control				2019-07-09			4388929	33079284	128	42	13.27	100.3	10.2	32.8	Human fetal astrocytes	Synaptosomes pHrodo red
Row 1875	LP01-302-10_0	SP190705_05	8389	15	3	Data	450	22.22	3.98	2019-07-09	STF-001071	STF-001071-1	4496429	32745302	126	44	13.73	103.8	11.7	34.9	Human fetal astrocytes	Synaptosomes pHrodo red
Row 1876	LP01-302-10_0	SP190705_05	8389	15	4	Data	450	22.22	7.21	2019-07-09	STF-001151	STF-001151-1	4994377	41850188	151	45	11.93	90.2	-7.1	29.8	Human fetal astrocytes	Synaptosomes pHrodo red
Row 1877	LP01-302-10_0	SP190705_05	8389	15	5	Data	450	22.22	3.06	2019-07-09	STF-001072	STF-001072-1	4501207	33306888	127	45	13.51	102.2	10.9	35.4	Human fetal astrocytes	Synaptosomes pHrodo red
Row 1878	LP01-302-10_0	SP190705_05	8389	15	6	Data	450	22.22	6.35	2019-07-09	STF-001152	STF-001152-1	4281507	33220920	134	41	12.89	97.4	5.6	30.6	Human fetal astrocytes	Synaptosomes pHrodo red
Row 1879	LP01-302-10_0	SP190705_05	8389	15	7	Data	450	22.22	13.53	2019-07-09	STF-001073	STF-001073-1	3116792	34029108	136	33	9.16	69.2	4.1	24.3	Human fetal astrocytes	Synaptosomes pHrodo red
Row 1880	LP01-302-10_0	SP190705_05	8389	15	8	Data	450	22.22	6.06	2019-07-09	STF-001153	STF-001153-1	3588833	35600416	148	36	10.08	76.2	-4.9	24.3	Human fetal astrocytes	Synaptosomes pHrodo red
Row 1881	LP01-302-10_0	SP190705_05	8389	15	9	Data	450	22.22	8.03	2019-07-09	STF-001074	STF-001074-1	5183902	32424826	127	47	15.99	120.8	10.9	37	Human fetal astrocytes	Synaptosomes pHrodo red
Row 1882	LP01-302-10_0	SP190705_05	8389	15	10	Data	450	22.22	9.55	2019-07-09	STF-001154	STF-001154-1	3294317	30210516	120	36	10.9	82.4	16.2	30	Human fetal astrocytes	Synaptosomes pHrodo red
Row 1883	LP01-302-10_0	SP190705_05	8389	15	11	Data	450	22.22	8.39	2019-07-09	STF-001075	STF-001075-1	3612099	28679052	122	38	12.59	95.2	14.7	31.1	Human fetal astrocytes	Synaptosomes pHrodo red
Row 1884	LP01-302-10_0	SP190705_05	8389	15	12	Data	450	22.22	14.25	2019-07-09	STF-001155	STF-001155-1	4261970	35648264	150	36	11.96	90.4	-6.4	24	Human fetal astrocytes	Synaptosomes pHrodo red
Row 1885	LP01-302-10_0	SP190705_05	8389	15	13	Data	450	22.22	6.75	2019-07-09	STF-001076	STF-001076-1	1420302	32782518	136	13	4.33	32.7	4.1	9.6	Human fetal astrocytes	Synaptosomes pHrodo red
Row 1886	LP01-302-10_0	SP190705_05	8389	15	14	Data	450	22.22	5.92	2019-07-09	STF-001156	STF-001156-1	3093185	32897496	135	32	9.4	71.1	4.9	23.7	Human fetal astrocytes	Synaptosomes pHrodo red
Row 1887	LP01-302-10_0	SP190705_05	8389	15	15	Data	450	22.22	3.87	2019-07-09	STF-001077	STF-001077-1	4982585	31727072	138	45	15.7	118.7	2.6	32.6	Human fetal astrocytes	Synaptosomes pHrodo red
Row 1888	LP01-302-10_0	SP190705_05	8389	15	16	Data	450	22.22	5	2019-07-09	STF-001157	STF-001157-1	4184939	33992564	137	42	12.31	93.1	3.4	30.7	Human fetal astrocytes	Synaptosomes pHrodo red
Row 1889	LP01-302-10_0	SP190705_05	8389	15	17	Data	450	22.22	6.24	2019-07-09	STF-001078	STF-001078-1	4171075	33369284	118	36	12.5	94.5	17.7	30.5	Human fetal astrocytes	Synaptosomes pHrodo red
Row 1890	LP01-302-10_0	SP190705_05	8389	15	18	Data	450	22.22	4.76	2019-07-09	STF-001158	STF-001158-1	3866112	31796618	136	34	12.16	91.9	4.1	25	Human fetal astrocytes	Synaptosomes pHrodo red
Row 1891	LP01-302-10_0	SP190705_05	8389	15	19	Data	450	22.22	5.9	2019-07-09	STF-001079	STF-001079-1	3630477	27590528	116	35	13.16	99.5	19.2	30.2	Human fetal astrocytes	Synaptosomes pHrodo red
Row 1892	LP01-302-10_0	SP190705_05	8389	15	20	Data	450	22.22	9.09	2019-07-09	STF-001159	STF-001159-1	3532216	34336972	128	29	10.29	77.8	10.2	22.7	Human fetal astrocytes	Synaptosomes pHrodo red
Row 1893	LP01-302-10_0	SP190705_05	8389	15	21	Data	450	22.22	3.09	2019-07-09	STF-001080	STF-001080-1	3531252	34367048	141	32	10.28	77.7	0.4	22.7	Human fetal astrocytes	Synaptosomes pHrodo red
Row 1894	LP01-302-10_0	SP190705_05	8389	15	22	Data	450	22.22	2.69	2019-07-09	STF-001160	STF-001160-1	3135701	31355352	124	27	10	75.6	13.2	21.8	Human fetal astrocytes	Synaptosomes pHrodo red
Row 1895	LP01-302-10_0	SP190705_05	8389	15	23	Positive Control				2019-07-09			0	15243924	56	0	0	0	64.3	0	Human fetal astrocytes	None
Row 1896	LP01-302-10_0	SP190705_05	8389	15	24	Low Control				2019-07-09			328167	3099861	7	6	10.59	80	101.1	85.7	Human fetal astrocytes	Synaptosomes pHrodo red
Row 1897	LP01-302-10_0	SP190705_05	8389	16	1	High Control				2019-07-09			3550607	30811304	116	35	11.52	87.1	19.2	30.2	Human fetal astrocytes	Synaptosomes pHrodo red
Row 1898	LP01-302-10_0	SP190705_05	8389	16	2	High Control				2019-07-09			4897004	31493288	114	46	15.55	117.5	20.7	40.4	Human fetal astrocytes	Synaptosomes pHrodo red
Row 1899	LP01-302-10_0	SP190705_05	8389	16	3	Data	450	22.22	4.94	2019-07-09	STF-001230	STF-001230-1	3404129	26181292	107	37	13	98.3	25.9	34.6	Human fetal astrocytes	Synaptosomes pHrodo red
Row 1900	LP01-302-10_0	SP190705_05	8389	16	4	Data	450	22.22	5.56	2019-07-09	STF-001308	STF-001308-1	4423814	36345000	138	47	12.17	92	2.6	34.1	Human fetal astrocytes	Synaptosomes pHrodo red
Row 1901	LP01-302-10_0	SP190705_05	8389	16	5	Data	450	22.22	9.67	2019-07-09	STF-001231	STF-001231-1	4108687	31077436	122	46	13.22	99.9	14.7	37.7	Human fetal astrocytes	Synaptosomes pHrodo red
Row 1902	LP01-302-10_0	SP190705_05	8389	16	6	Data	450	22.22	7.55	2019-07-09	STF-001309	STF-001309-1	4684458	33582976	127	46	13.95	105.4	10.9	36.2	Human fetal astrocytes	Synaptosomes pHrodo red
Row 1903	LP01-302-10_0	SP190705_05	8389	16	7	Data	450	22.22	6.53	2019-07-09	STF-001232	STF-001232-1	2140556	29862272	131	25	7.17	54.2	7.9	19.1	Human fetal astrocytes	Synaptosomes pHrodo red
Row 1904	LP01-302-10_0	SP190705_05	8389	16	8	Data	450	22.22	11.68	2019-07-09	STF-001310	STF-001310-1	2671377	29774444	119	24	8.97	67.8	16.9	20.2	Human fetal astrocytes	Synaptosomes pHrodo red
Row 1905	LP01-302-10_0	SP190705_05	8389	16	9	Data	450	22.22	5.43	2019-07-09	STF-001233	STF-001233-1	3328410	28985368	119	31	11.48	86.8	16.9	26.1	Human fetal astrocytes	Synaptosomes pHrodo red
Row 1906	LP01-302-10_0	SP190705_05	8389	16	10	Data	450	22.22	8.19	2019-07-09	STF-001311	STF-001311-1	5277875	34965624	132	46	15.09	114.1	7.1	34.8	Human fetal astrocytes	Synaptosomes pHrodo red
Row 1907	LP01-302-10_0	SP190705_05	8389	16	11	Data	450	22.22	7.56	2019-07-09	STF-001234	STF-001234-1	4790416	35397248	140	48	13.53	102.3	1.1	34.3	Human fetal astrocytes	Synaptosomes pHrodo red
Row 1908	LP01-302-10_0	SP190705_05	8389	16	12	Data	450	22.22	7.66	2019-07-09	STF-001312	STF-001312-1	2452862	36395232	129	18	6.74	50.9	9.4	14	Human fetal astrocytes	Synaptosomes pHrodo red
Row 1909	LP01-302-10_0	SP190705_05	8389	16	13	Data	450	22.22	8.85	2019-07-09	STF-001235	STF-001235-1	3927156	26250796	108	39	14.96	113.1	25.2	36.1	Human fetal astrocytes	Synaptosomes pHrodo red
Row 1910	LP01-302-10_0	SP190705_05	8389	16	14	Data	450	22.22	6.22	2019-07-09	STF-001313	STF-001313-1	3047177	28969384	126	31	10.52	79.5	11.7	24.6	Human fetal astrocytes	Synaptosomes pHrodo red
Row 1911	LP01-302-10_0	SP190705_05	8389	16	15	Data	450	22.22	11.05	2019-07-09	STF-001236	STF-001236-1	4936749	34680624	130	40	14.23	107.6	8.6	30.8	Human fetal astrocytes	Synaptosomes pHrodo red
Row 1912	LP01-302-10_0	SP190705_05	8389	16	16	Data	450	22.22	11.64	2019-07-09	STF-001314	STF-001314-1	0	1571707	10	0	0	0	98.9	0	Human fetal astrocytes	Synaptosomes pHrodo red
Row 1913	LP01-302-10_0	SP190705_05	8389	16	17	Data	450	22.22	5.8	2019-07-09	STF-001237	STF-001237-1	5014658	37879824	148	38	13.24	100.1	-4.9	25.7	Human fetal astrocytes	Synaptosomes pHrodo red
Row 1914	LP01-302-10_0	SP190705_05	8389	16	18	Data	450	22.22	4.76	2019-07-09	STF-001315	STF-001315-1	2850064	21713144	91	37	13.13	99.2	38	40.7	Human fetal astrocytes	Synaptosomes pHrodo red
Row 1915	LP01-302-10_0	SP190705_05	8389	16	19	Data	450	22.22	7.64	2019-07-09	STF-001238	STF-001238-1	3618635	36157288	143	30	10.01	75.6	-1.1	21	Human fetal astrocytes	Synaptosomes pHrodo red
Row 1916	LP01-302-10_0	SP190705_05	8389	16	20	Data	450	22.22	5.79	2019-07-09	STF-001316	STF-001316-1	3972462	31448052	124	34	12.63	95.5	13.2	27.4	Human fetal astrocytes	Synaptosomes pHrodo red
Row 1917	LP01-302-10_0	SP190705_05	8389	16	21	Data	450	22.22	8.01	2019-07-09	STF-001239	STF-001239-1	4572907	32586444	125	41	14.03	106.1	12.4	32.8	Human fetal astrocytes	Synaptosomes pHrodo red
Row 1918	LP01-302-10_0	SP190705_05	8389	16	22	Data	450	22.22	6.09	2019-07-09	STF-001317	STF-001317-1	4294496	31529864	120	38	13.62	103	16.2	31.7	Human fetal astrocytes	Synaptosomes pHrodo red
Row 1919	LP01-302-10_0	SP190705_05	8389	16	23	Positive Control				2019-07-09			0	15128418	60	0	0	0	61.3	0	Human fetal astrocytes	None
Row 1920	LP01-302-10_0	SP190705_05	8389	16	24	Low Control				2019-07-09			424989	2910312	7	7	14.6	110.4	101.1	100	Human fetal astrocytes	Synaptosomes pHrodo red
Row 1921	LP05-302-0_625	SP190705_06	8411	1	1	High Control				2019-07-09			4130808	27046450	96	42	15.27	115.5	28	43.8	Human fetal astrocytes	Synaptosomes pHrodo red
Row 1922	LP05-302-0_625	SP190705_06	8411	1	2	High Control				2019-07-09			4493478	34139256	129	43	13.16	99.6	0.4	33.3	Human fetal astrocytes	Synaptosomes pHrodo red
Row 1923	LP05-302-0_625	SP190705_06	8411	1	3	Data	450	1.39	0.44	2019-07-09	STF-001396	STF-001396-1	6378869	43115584	147	54	14.79	111.9	-14.6	36.7	Human fetal astrocytes	Synaptosomes pHrodo red
Row 1924	LP05-302-0_625	SP190705_06	8411	1	4	Data	450	1.39	0.5	2019-07-09	STF-001397	STF-001397-1	4275745	38626408	147	37	11.07	83.7	-14.6	25.2	Human fetal astrocytes	Synaptosomes pHrodo red
Row 1925	LP05-302-0_625	SP190705_06	8411	1	5	Data	450	1.39	0.3	2019-07-09	STF-001395	STF-001395-1	4727028	39162792	147	39	12.07	91.3	-14.6	26.5	Human fetal astrocytes	Synaptosomes pHrodo red
Row 1926	LP05-302-0_625	SP190705_06	8411	1	6	Data	450	1.39	0.47	2019-07-09	STF-001398	STF-001398-1	4816336	37516044	144	46	12.84	97.1	-12.1	31.9	Human fetal astrocytes	Synaptosomes pHrodo red
Row 1927	LP05-302-0_625	SP190705_06	8411	1	7	Data	450	1.39	0.4	2019-07-09	STF-001394	STF-001394-1	5233386	37583960	140	46	13.92	105.3	-8.8	32.9	Human fetal astrocytes	Synaptosomes pHrodo red
Row 1928	LP05-302-0_625	SP190705_06	8411	1	8	Data	450	1.39	0.23	2019-07-09	STF-001399	STF-001399-1	6109584	40556648	157	54	15.06	113.9	-23	34.4	Human fetal astrocytes	Synaptosomes pHrodo red
Row 1929	LP05-302-0_625	SP190705_06	8411	1	9	Data	450	1.39	0.24	2019-07-09	STF-001393	STF-001393-1	4396760	39910624	163	43	11.02	83.3	-28	26.4	Human fetal astrocytes	Synaptosomes pHrodo red
Row 1930	LP05-302-0_625	SP190705_06	8411	1	10	Data	450	1.39	0.32	2019-07-09	STF-001400	STF-001400-1	4431412	33946236	122	38	13.05	98.7	6.3	31.1	Human fetal astrocytes	Synaptosomes pHrodo red
Row 1931	LP05-302-0_625	SP190705_06	8411	1	11	Data	450	1.39	1.06	2019-07-09	STF-001392	STF-001392-1	4046223	34778636	137	36	11.63	88	-6.3	26.3	Human fetal astrocytes	Synaptosomes pHrodo red
Row 1932	LP05-302-0_625	SP190705_06	8411	1	12	Data	450	1.39	0.67	2019-07-09	STF-001401	STF-001401-1	6397293	41812228	150	50	15.3	115.7	-17.2	33.3	Human fetal astrocytes	Synaptosomes pHrodo red
Row 1933	LP05-302-0_625	SP190705_06	8411	1	13	Data	450	1.39	1.23	2019-07-09	STF-001391	STF-001391-1	4873920	40020108	151	39	12.18	92.1	-18	25.8	Human fetal astrocytes	Synaptosomes pHrodo red
Row 1934	LP05-302-0_625	SP190705_06	8411	1	14	Data	450	1.39	0.52	2019-07-09	STF-015905	STF-015905-2	4810220	44313664	158	40	10.85	82.1	-23.8	25.3	Human fetal astrocytes	Synaptosomes pHrodo red
Row 1935	LP05-302-0_625	SP190705_06	8411	1	15	Data	450	1.39	0.34	2019-07-09	STF-001390	STF-001390-1	4787081	41840340	156	38	11.44	86.5	-22.2	24.4	Human fetal astrocytes	Synaptosomes pHrodo red
Row 1936	LP05-302-0_625	SP190705_06	8411	1	16	Data	450	1.39	0.63	2019-07-09	STF-001402	STF-001402-1	3646629	32785846	140	32	11.12	84.1	-8.8	22.9	Human fetal astrocytes	Synaptosomes pHrodo red
Row 1937	LP05-302-0_625	SP190705_06	8411	1	17	Data	450	1.39	0.46	2019-07-09	STF-001389	STF-001389-1	4167680	36464616	136	40	11.43	86.4	-5.4	29.4	Human fetal astrocytes	Synaptosomes pHrodo red
Row 1938	LP05-302-0_625	SP190705_06	8411	1	18	Data	450	1.39	0.56	2019-07-09	STF-001403	STF-001403-1	3912670	38314456	148	31	10.21	77.2	-15.5	20.9	Human fetal astrocytes	Synaptosomes pHrodo red
Row 1939	LP05-302-0_625	SP190705_06	8411	1	19	Data	450	1.39	0.57	2019-07-09	STF-001388	STF-001388-1	4982843	42246156	164	42	11.79	89.2	-28.9	25.6	Human fetal astrocytes	Synaptosomes pHrodo red
Row 1940	LP05-302-0_625	SP190705_06	8411	1	20	Data	450	1.39	0.98	2019-07-09	STF-001404	STF-001404-1	3875754	33735808	127	31	11.49	86.9	2.1	24.4	Human fetal astrocytes	Synaptosomes pHrodo red
Row 1941	LP05-302-0_625	SP190705_06	8411	1	21	Data	450	1.39	0.34	2019-07-09	STF-001387	STF-001387-1	4748515	38927496	152	44	12.2	92.3	-18.8	28.9	Human fetal astrocytes	Synaptosomes pHrodo red
Row 1942	LP05-302-0_625	SP190705_06	8411	1	22	Data	450	1.39	0.34	2019-07-09	STF-001405	STF-001405-1	4194375	33903928	131	40	12.37	93.6	-1.3	30.5	Human fetal astrocytes	Synaptosomes pHrodo red
Row 1943	LP05-302-0_625	SP190705_06	8411	1	23	Positive Control				2019-07-09			0	8698724	27	0	0	0	85.8	0	Human fetal astrocytes	None
Row 1944	LP05-302-0_625	SP190705_06	8411	1	24	Low Control				2019-07-09			511272	4281719	10	8	11.94	90.3	100	80	Human fetal astrocytes	Synaptosomes pHrodo red
Row 1945	LP05-302-0_625	SP190705_06	8411	2	1	High Control				2019-07-09			5514802	38622856	123	47	14.28	108	5.4	38.2	Human fetal astrocytes	Synaptosomes pHrodo red
Row 1946	LP05-302-0_625	SP190705_06	8411	2	2	High Control				2019-07-09			4335988	30532112	111	37	14.2	107.4	15.5	33.3	Human fetal astrocytes	Synaptosomes pHrodo red
Row 1947	LP05-302-0_625	SP190705_06	8411	2	3	Data	450	1.39	0.68	2019-07-09	STF-001475	STF-001475-1	5230236	37484296	137	41	13.95	105.5	-6.3	29.9	Human fetal astrocytes	Synaptosomes pHrodo red
Row 1948	LP05-302-0_625	SP190705_06	8411	2	4	Data	450	1.39	0.23	2019-07-09	STF-001555	STF-001555-1	6378858	37774632	146	52	16.89	127.7	-13.8	35.6	Human fetal astrocytes	Synaptosomes pHrodo red
Row 1949	LP05-302-0_625	SP190705_06	8411	2	5	Data	450	1.39	0.97	2019-07-09	STF-001476	STF-001476-1	4947489	34044040	129	46	14.53	109.9	0.4	35.7	Human fetal astrocytes	Synaptosomes pHrodo red
Row 1950	LP05-302-0_625	SP190705_06	8411	2	6	Data	450	1.39	0.41	2019-07-09	STF-001556	STF-001556-1	5032139	37086244	147	49	13.57	102.6	-14.6	33.3	Human fetal astrocytes	Synaptosomes pHrodo red
Row 1951	LP05-302-0_625	SP190705_06	8411	2	7	Data	450	1.39	0.48	2019-07-09	STF-001477	STF-001477-1	5684295	36705940	135	50	15.49	117.1	-4.6	37	Human fetal astrocytes	Synaptosomes pHrodo red
Row 1952	LP05-302-0_625	SP190705_06	8411	2	8	Data	450	1.39	0.63	2019-07-09	STF-001557	STF-001557-1	5440382	34919232	135	48	15.58	117.8	-4.6	35.6	Human fetal astrocytes	Synaptosomes pHrodo red
Row 1953	LP05-302-0_625	SP190705_06	8411	2	9	Data	450	1.39	0.38	2019-07-09	STF-001478	STF-001478-1	5086873	37419056	150	45	13.59	102.8	-17.2	30	Human fetal astrocytes	Synaptosomes pHrodo red
Row 1954	LP05-302-0_625	SP190705_06	8411	2	10	Data	450	1.39	0.21	2019-07-09	STF-001558	STF-001558-1	5352511	41590040	179	51	12.87	97.3	-41.4	28.5	Human fetal astrocytes	Synaptosomes pHrodo red
Row 1955	LP05-302-0_625	SP190705_06	8411	2	11	Data	450	1.39	0.54	2019-07-09	STF-001479	STF-001479-1	3915766	34351880	136	34	11.4	86.2	-5.4	25	Human fetal astrocytes	Synaptosomes pHrodo red
Row 1956	LP05-302-0_625	SP190705_06	8411	2	12	Data	450	1.39	0.46	2019-07-09	STF-001559	STF-001559-1	5779052	36951572	131	50	15.64	118.3	-1.3	38.2	Human fetal astrocytes	Synaptosomes pHrodo red
Row 1957	LP05-302-0_625	SP190705_06	8411	2	13	Data	450	1.39	0.71	2019-07-09	STF-001480	STF-001480-1	5157020	37648640	130	35	13.7	103.6	-0.4	26.9	Human fetal astrocytes	Synaptosomes pHrodo red
Row 1958	LP05-302-0_625	SP190705_06	8411	2	14	Data	450	1.39	0.27	2019-07-09	STF-001560	STF-001560-1	7317060	47216092	159	57	15.5	117.2	-24.7	35.8	Human fetal astrocytes	Synaptosomes pHrodo red
Row 1959	LP05-302-0_625	SP190705_06	8411	2	15	Data	450	1.39	0.48	2019-07-09	STF-001481	STF-001481-1	4195568	41351600	149	39	10.15	76.7	-16.3	26.2	Human fetal astrocytes	Synaptosomes pHrodo red
Row 1960	LP05-302-0_625	SP190705_06	8411	2	16	Data	450	1.39	0.4	2019-07-09	STF-001561	STF-001561-1	4494859	36121240	149	39	12.44	94.1	-16.3	26.2	Human fetal astrocytes	Synaptosomes pHrodo red
Row 1961	LP05-302-0_625	SP190705_06	8411	2	17	Data	450	1.39	0.46	2019-07-09	STF-001482	STF-001482-1	5936999	42736592	155	50	13.89	105.1	-21.3	32.3	Human fetal astrocytes	Synaptosomes pHrodo red
Row 1962	LP05-302-0_625	SP190705_06	8411	2	18	Data	450	1.39	0.21	2019-07-09	STF-001562	STF-001562-1	3864714	32646972	148	37	11.84	89.5	-15.5	25	Human fetal astrocytes	Synaptosomes pHrodo red
Row 1963	LP05-302-0_625	SP190705_06	8411	2	19	Data	450	1.39	0.38	2019-07-09	STF-001483	STF-001483-1	4863970	36724188	144	44	13.24	100.2	-12.1	30.6	Human fetal astrocytes	Synaptosomes pHrodo red
Row 1964	LP05-302-0_625	SP190705_06	8411	2	20	Data	450	1.39	0.46	2019-07-09	STF-001563	STF-001563-1	4970219	39913968	151	41	12.45	94.2	-18	27.2	Human fetal astrocytes	Synaptosomes pHrodo red
Row 1965	LP05-302-0_625	SP190705_06	8411	2	21	Data	450	1.39	0.73	2019-07-09	STF-001484	STF-001484-1	3220004	34876128	148	29	9.23	69.8	-15.5	19.6	Human fetal astrocytes	Synaptosomes pHrodo red
Row 1966	LP05-302-0_625	SP190705_06	8411	2	22	Data	450	1.39	0.26	2019-07-09	STF-001564	STF-001564-1	5471540	37701000	140	47	14.51	109.8	-8.8	33.6	Human fetal astrocytes	Synaptosomes pHrodo red
Row 1967	LP05-302-0_625	SP190705_06	8411	2	23	Positive Control				2019-07-09			0	16025467	59	0	0	0	59	0	Human fetal astrocytes	None
Row 1968	LP05-302-0_625	SP190705_06	8411	2	24	Low Control				2019-07-09			284657	2871876	8	5	9.91	75	101.7	62.5	Human fetal astrocytes	Synaptosomes pHrodo red
Row 1969	LP05-302-0_625	SP190705_06	8411	3	1	High Control				2019-07-09			4781322	33458876	130	43	14.29	108.1	-0.4	33.1	Human fetal astrocytes	Synaptosomes pHrodo red
Row 1970	LP05-302-0_625	SP190705_06	8411	3	2	High Control				2019-07-09			5623054	38681976	132	52	14.54	109.9	-2.1	39.4	Human fetal astrocytes	Synaptosomes pHrodo red
Row 1971	LP05-302-0_625	SP190705_06	8411	3	3	Data	450	1.39	0.28	2019-07-09	STF-001386	STF-001386-1	4755132	32994556	132	54	14.41	109	-2.1	40.9	Human fetal astrocytes	Synaptosomes pHrodo red
Row 1972	LP05-302-0_625	SP190705_06	8411	3	4	Data	450	1.39	0.61	2019-07-09	STF-001406	STF-001406-1	4922878	33878192	135	46	14.53	109.9	-4.6	34.1	Human fetal astrocytes	Synaptosomes pHrodo red
Row 1973	LP05-302-0_625	SP190705_06	8411	3	5	Data	450	1.39	0.25	2019-07-09	STF-001385	STF-001385-1	6025691	42748268	159	54	14.1	106.6	-24.7	34	Human fetal astrocytes	Synaptosomes pHrodo red
Row 1974	LP05-302-0_625	SP190705_06	8411	3	6	Data	450	1.39	0.35	2019-07-09	STF-001407	STF-001407-1	4682877	32440156	130	44	14.44	109.2	-0.4	33.8	Human fetal astrocytes	Synaptosomes pHrodo red
Row 1975	LP05-302-0_625	SP190705_06	8411	3	7	Data	450	1.39	0.33	2019-07-09	STF-001384	STF-001384-1	5697607	36120584	138	51	15.77	119.3	-7.1	37	Human fetal astrocytes	Synaptosomes pHrodo red
Row 1976	LP05-302-0_625	SP190705_06	8411	3	8	Data	450	1.39	0.59	2019-07-09	STF-001408	STF-001408-1	3231610	32455440	129	26	9.96	75.3	0.4	20.2	Human fetal astrocytes	Synaptosomes pHrodo red
Row 1977	LP05-302-0_625	SP190705_06	8411	3	9	Data	450	1.39	0.12	2019-07-09	STF-001383	STF-001383-1	5525806	38886628	134	47	14.21	107.5	-3.8	35.1	Human fetal astrocytes	Synaptosomes pHrodo red
Row 1978	LP05-302-0_625	SP190705_06	8411	3	10	Data	450	1.39	0.23	2019-07-09	STF-001409	STF-001409-1	2486983	27777528	112	28	8.95	67.7	14.6	25	Human fetal astrocytes	Synaptosomes pHrodo red
Row 1979	LP05-302-0_625	SP190705_06	8411	3	11	Data	450	1.39	0.44	2019-07-09	STF-001382	STF-001382-1	3803508	32397856	127	36	11.74	88.8	2.1	28.3	Human fetal astrocytes	Synaptosomes pHrodo red
Row 1980	LP05-302-0_625	SP190705_06	8411	3	12	Data	450	1.39	0.36	2019-07-09	STF-001410	STF-001410-1	4865907	31921372	122	41	15.24	115.3	6.3	33.6	Human fetal astrocytes	Synaptosomes pHrodo red
Row 1981	LP05-302-0_625	SP190705_06	8411	3	13	Data	450	1.39	0.58	2019-07-09	STF-001381	STF-001381-1	5477397	35848128	139	48	15.28	115.6	-7.9	34.5	Human fetal astrocytes	Synaptosomes pHrodo red
Row 1982	LP05-302-0_625	SP190705_06	8411	3	14	Data	450	1.39	0.43	2019-07-09	STF-001411	STF-001411-1	4665128	38310252	141	36	12.18	92.1	-9.6	25.5	Human fetal astrocytes	Synaptosomes pHrodo red
Row 1983	LP05-302-0_625	SP190705_06	8411	3	15	Data	450	1.39	0.38	2019-07-09	STF-001380	STF-001380-1	4910982	37122284	142	46	13.23	100.1	-10.5	32.4	Human fetal astrocytes	Synaptosomes pHrodo red
Row 1984	LP05-302-0_625	SP190705_06	8411	3	16	Data	450	1.39	0.35	2019-07-09	STF-001412	STF-001412-1	5312357	43143452	155	41	12.31	93.1	-21.3	26.5	Human fetal astrocytes	Synaptosomes pHrodo red
Row 1985	LP05-302-0_625	SP190705_06	8411	3	17	Data	450	1.39	0.38	2019-07-09	STF-001379	STF-001379-1	3508848	32775256	128	30	10.71	81	1.3	23.4	Human fetal astrocytes	Synaptosomes pHrodo red
Row 1986	LP05-302-0_625	SP190705_06	8411	3	18	Data	450	1.39	0.32	2019-07-09	STF-001413	STF-001413-1	2346861	34399104	141	25	6.82	51.6	-9.6	17.7	Human fetal astrocytes	Synaptosomes pHrodo red
Row 1987	LP05-302-0_625	SP190705_06	8411	3	19	Data	450	1.39	0.31	2019-07-09	STF-001378	STF-001378-1	4979432	35543880	136	44	14.01	106	-5.4	32.4	Human fetal astrocytes	Synaptosomes pHrodo red
Row 1988	LP05-302-0_625	SP190705_06	8411	3	20	Data	450	1.39	0.18	2019-07-09	STF-001414	STF-001414-1	4627997	36714828	143	38	12.61	95.3	-11.3	26.6	Human fetal astrocytes	Synaptosomes pHrodo red
Row 1989	LP05-302-0_625	SP190705_06	8411	3	21	Data	450	1.39	0.42	2019-07-09	STF-001377	STF-001377-1	4970564	34509632	114	37	14.4	108.9	13	32.5	Human fetal astrocytes	Synaptosomes pHrodo red
Row 1990	LP05-302-0_625	SP190705_06	8411	3	22	Data	450	1.39	0.82	2019-07-09	STF-001415	STF-001415-1	4661789	33002884	125	32	14.13	106.8	3.8	25.6	Human fetal astrocytes	Synaptosomes pHrodo red
Row 1991	LP05-302-0_625	SP190705_06	8411	3	23	Positive Control				2019-07-09			148478	16869730	66	1	0.88	6.7	53.1	1.5	Human fetal astrocytes	None
Row 1992	LP05-302-0_625	SP190705_06	8411	3	24	Low Control				2019-07-09			189546	2924274	7	3	6.48	49	102.5	42.9	Human fetal astrocytes	Synaptosomes pHrodo red
Row 1993	LP05-302-0_625	SP190705_06	8411	4	1	High Control				2019-07-09			6212221	36765132	131	52	16.9	127.8	-1.3	39.7	Human fetal astrocytes	Synaptosomes pHrodo red
Row 1994	LP05-302-0_625	SP190705_06	8411	4	2	High Control				2019-07-09			5638364	37032268	137	44	15.23	115.2	-6.3	32.1	Human fetal astrocytes	Synaptosomes pHrodo red
Row 1995	LP05-302-0_625	SP190705_06	8411	4	3	Data	450	1.39	1.24	2019-07-09	STF-001485	STF-001485-1	5837980	36844880	140	50	15.84	119.8	-8.8	35.7	Human fetal astrocytes	Synaptosomes pHrodo red
Row 1996	LP05-302-0_625	SP190705_06	8411	4	4	Data	450	1.39	0.23	2019-07-09	STF-001565	STF-001565-1	5242918	34736264	130	52	15.09	114.2	-0.4	40	Human fetal astrocytes	Synaptosomes pHrodo red
Row 1997	LP05-302-0_625	SP190705_06	8411	4	5	Data	450	1.39	0.2	2019-07-09	STF-001486	STF-001486-1	5450461	35553720	139	51	15.33	116	-7.9	36.7	Human fetal astrocytes	Synaptosomes pHrodo red
Row 1998	LP05-302-0_625	SP190705_06	8411	4	6	Data	450	1.39	0.74	2019-07-09	STF-001566	STF-001566-1	6294227	33389548	120	52	18.85	142.6	7.9	43.3	Human fetal astrocytes	Synaptosomes pHrodo red
Row 1999	LP05-302-0_625	SP190705_06	8411	4	7	Data	450	1.39	0.48	2019-07-09	STF-001487	STF-001487-1	6197289	37547380	125	47	16.51	124.8	3.8	37.6	Human fetal astrocytes	Synaptosomes pHrodo red
[truncated: 17,201 more rows]

## Sheet: LOPAC Results
Row ID	Compound Plate	Assay Plate	Corp_ID	Sample_ID	Mean % Pos	Mean %Inh	MolName	activity	toxicity	PAINS	CATNUM	cdbregno	mol weight STRUCTURE	compound corp reg number	RackNo	compound_Alias	Class (Batch Comment)	Enzyme (H-acc)	Action (H-don)	compound_custom_2	compound_comments	STF_ID	CID	CID	PAINS_A	PAINS_B	PAINS_C	PossibleFalseAromaticityDetection	MinAC	MaxAC	MinTC	MaxTC	CanonicalSmiles	MolecularWeight	XLogP	HydrogenBondDonorCount	HydrogenBondAcceptorCount	TPSA	Complexity	RotatableBondCount	MolecularFormula	TotalFormalCharge	HeavyAtomCount	AtomChiralCount	AtomChiralDefCount	AtomChiralUndefCount	BondChiralCount	BondChiralDefCount	BondChiralUndefCount
Row 1		1	1		1			decrease phagocytosis	non-toxic
Row 1	LP01	SP190705_01-_05	STF-001001	STF-001001-1	119.9	-11.4	DL-alpha-Methyl-p-tyrosine	inactive	non-toxic		120693	136428	195.22	STF-001001	LP01	4-Hydroxy-alpha-methylphenylalanine	Neurotransmission	Enzyme	Inhibitor	Tyrosine hydroxylase	Inhibitor of catecholamine synthesis and tyrosine hydroxylase	STF-001001	3125	3125					0.0005	37.933			CC(CC1=CC=C(C=C1)O)(C(=O)O)N	195.215	-1.6	3	4	83.6	211	3	C10H13NO3	0	14	1	0	1	0	0	0
Row 10	LP01	SP190705_01-_05	STF-001002	STF-001002-1	87.4	-16.4	6-Methoxy-1,2,3,4-tetrahydro-9H-pyrido[3,4b] indole	inactive	non-toxic		291552	136429	202.258	STF-001002	LP01		Neurotransmission	Enzyme	Inhibitor	MAO	MAO inhibitor	STF-001002	1868	1868					0.0014	227.03			COC1=CC2=C(C=C1)NC3=C2CCNC3	202.252	1.5	2	2	37	234	1	C12H14N2O	0	15	0	0	0	0	0	0
Row 100	LP07	SP190705_06-_10	STF-001476	STF-001476-1	100.9	-11.5	Guanidinyl-naltrindole di-trifluoroacetate	inactive	non-toxic		G 3416	136980	699.612	STF-001476	LP07	GNTI di-trifluoroacetate	Opioid		Antagonist	kappa	Selective kappa opioid receptor antagonist	STF-001476	9826034	9826034				TRUE	0.00015	79.4328			C1CC1CN2CCC34C5C6=C(CC3(C2CC7=C4C(=C(C=C7)O)O5)O)C8=C(N6)C=CC(=C8)N=C(N)N	471.551	1.8	5	5	133	925	3	C27H29N5O3	0	35	4	4	0	0	0	0
Row 1000	LP15	SP190705_15-_20	STF-002167	STF-002167-1	107.6	-18.5	Tyrphostin AG 808	inactive	non-toxic	PAINS	T 5318	137594	304.308	STF-002167	LP15	2-Cyano-3-(3',4'-dihydroxyphenyl)-1-(3"-indolyl)-3-oxo-1-propene	Phosphorylation	Enzyme	Inhibitor	Tyrosine kinase	Protein tyrosine kinase inhibitor	STF-002167	5329275	5329275		catechol_A(92)			0.0008	67.4555			C1=CC=C2C(=C1)C(=CN2)C=C(C#N)C(=O)C3=CC(=C(C=C3)O)O	304.299	3	3	4	97.1	536	3	C18H12N2O3	0	23	0	0	0	1	1	0
Row 1001	LP04	SP190705_01-_05	STF-001295	STF-001295-1	96.4	-8.9	Chelidamic acid	inactive	non-toxic		C 8011	136722	183.122	STF-001295	LP04	4-Hydroxypyridine-2,6-dicarboxylic acid	Glutamate	Enzyme	Inhibitor	L-glutamic decarboxylase	L-glutamic decarboxylase inhibitor	STF-001295	8743	8743					0.0022	170			C1=C(NC(=CC1=O)C(=O)O)C(=O)O	183.118	-0.4	3	6	104	320	2	C7H5NO5	0	13	0	0	0	0	0	0
Row 1002	LP08	SP190705_06-_10	STF-001611	STF-001611-1	101.9	-4.3	Histamine, R(-)-alpha-methyl-, dihydrochloride	inactive	non-toxic		H-128	137039	198.097	STF-001611	LP08	R(-)-alpha-Methylhistamine dihydrochloride	Histamine		Agonist	H3	Potent, selective H3 histamine receptor agonist which crosses the blood-brain barrier; inhibits histamine synthesis and release	STF-001611	156615	156615					0.000316	79.4328			CC(CC1=CN=CN1)N	125.172	-0.3	2	2	54.7	84.4	2	C6H11N3	0	9	1	1	0	0	0	0
Row 1003	LP12	SP190705_11-_15	STF-001929	STF-001929-1	58.5	9.4	SU 9516	decrease phagocytosis	non-toxic		S 1693	137357	241.252	STF-001929	LP12		Cell Cycle	Enzyme	Inhibitor	Cdk2	Cylcin-dependent kinase-2 (Cdk-2) inhibitor; induces apoptosis in colon cancer cells	STF-001929	5289419	5289419					0.022	350			COC1=CC2=C(C=C1)NC(=O)C2=CC3=CN=CN3	241.245	1	2	3	67	369	2	C13H11N3O2	0	18	0	0	0	1	1	0
Row 1004	LP16	SP190705_15-_20	STF-002247	STF-002247-1	116.9	-31.9	1400W dihydrochloride	inactive	non-toxic		W 4262	137674	250.173	STF-002247	LP16		Nitric Oxide	Enzyme	Inhibitor	iNOS	Selective inhibitor of inducible nitric oxide synthase (iNOS)	STF-002247	1433	1433					0.00631	3333			CC(=NCC1=CC(=CC=C1)CN)N	177.246	-0.2	2	2	64.4	177	3	C10H15N3	0	13	0	0	0	0	0	0
Row 1005	LP03	SP190705_01-_05	STF-001218	STF-001218-1	99.9	-3.1	(+)-Catechin Hydrate	inactive	non-toxic	PAINS	C 1251	136645	290.275	STF-001218	LP03	(+)-Cyanidol-3	Cell Stress		Inhibitor	Antioxidant	Antioxidant; free radical scavenger	STF-001218	9064	9064		catechol_A(92)			0.7079	84.9214			C1C(C(OC2=CC(=CC(=C21)O)O)C3=CC(=C(C=C3)O)O)O	290.268	0.4	5	6	110	364	1	C15H14O6	0	21	2	2	0	0	0	0
Row 1006	LP07	SP190705_06-_10	STF-001533	STF-001533-1	98.8	-1.2	(-)-Epinephrine bitartrate	inactive	non-toxic	PAINS	E 4375	136923	333.298	STF-001533	LP07	Adrenaline bitartrate	Adrenoceptor		Agonist		Endogenous hormone and neurotransmitter	STF-001533	5816	5816		catechol_A(92)			0.005	1900			CNCC(C1=CC(=C(C=C1)O)O)O	183.204	-1.4	4	4	72.7	154	3	C9H13NO3	0	13	1	1	0	0	0	0
Row 1007	LP11	SP190705_11-_15	STF-001850	STF-001850-1	53.7	42.7	2-(alpha-Naphthoyl)ethyltrimethylammonium iodide	decrease phagocytosis	toxic		N 7906	137278	369.248	STF-001850	LP11	alpha-NETA	Cholinergic	Enzyme	Inhibitor	Choline Acetyltransferase	Selective, fluorescent inhibitor of choline acetyltransferase	STF-001850	1518	1518					0.0501	50.1187			C[N+](C)(C)CCC(=O)C1=CC=CC2=CC=CC=C21	242.336	2.8	0	1	17.1	292	4	C16H20NO+	1	18	0	0	0	0	0	0
Row 1008	LP15	SP190705_15-_20	STF-002168	STF-002168-1	119.7	-50.2	Triamcinolone	inactive	non-toxic		T 6376	137595	394.444	STF-002168	LP15	Fluoxyprednisolone	Hormone		Agonist	Glucocorticoid	Synthetic glucocorticoid agonist; inducer of gene expression and apoptosis	STF-002168	31307	31307					0.0045	89.1251			CC12CC(C3(C(C1CC(C2(C(=O)CO)O)O)CCC4=CC(=O)C=CC43C)F)O	394.434	1.2	4	7	115	807	2	C21H27FO6	0	28	8	8	0	0	0	0
Row 1009	LP04	SP190705_01-_05	STF-001296	STF-001296-1	107.2	3.9	DSP-4 hydrochloride	inactive	non-toxic		C 8417	136723	313.067	STF-001296	LP04	N-(2-Chloroethyl)-N-ethyl-2-bromobenzylamine hydrochloride	Adrenoceptor		Neurotoxin		Adrenergic neurotoxin which induces acute and relatively selective degeneration of both central and peripheral noradrenergic terminals in the rat and mouse	STF-001296	3172	3172					0.0757	75.193			CCN(CCCl)CC1=CC=CC=C1Br	276.601	3.4	0	1	3.2	154	5	C11H15BrClN	0	14	0	0	0	0	0	0
Row 101	LP11	SP190705_11-_15	STF-001794	STF-001794-1	99.8	1	Minocycline hydrochloride	inactive	non-toxic		M 9511	137222	492.961	STF-001794	LP11		Cell Cycle	Enzyme	Inhibitor		Basement membrane protease inhibitor; inhibits endothelial cell proliferation and angiogenesis.	STF-001794	54693837	54693837				TRUE	1.9953	56.2341			CC(C)C1C2CC3CC4=C(C=CC(=C4C(=C3C(=O)C2(C(=C(C1=O)C(=O)N)O)O)O)O)N(C)C	456.488	0.6	5	8	161	968	3	C24H28N2O7	0	33	4	4	0	0	0	0
Row 1010	LP08	SP190705_06-_10	STF-001612	STF-001612-1	50.6	10.6	Indirubin-3'-oxime	decrease phagocytosis	non-toxic		I 0404	137040	277.285	STF-001612	LP08	Indirubin-3'-monoxime	Phosphorylation	Enzyme	Inhibitor	CDK	Cyclin dependent kinase (CDK) inhibitor; competes with ATP for catalytic subunit binding	STF-001612	5326739	5326739					0.005	1000			C1=CC=C2C(=C1)C(=C(N2)C3=C4C=CC=CC4=NC3=O)NO	277.277	2.2	3	3	77.5	603	2	C16H11N3O2	0	21	0	0	0	0	0	0
Row 1011	LP12	SP190705_11-_15	STF-001930	STF-001930-1	99.5	7.1	Pempidine tartrate	inactive	non-toxic		P 5114	137358	305.374	STF-001930	LP12	Pirilene	Cholinergic		Antagonist	Nicotinic	A neuronal nicotinic acetylcholine receptor antagonist; potent ganglioblocker; Antihypertensive	STF-001930	6603	6603									CC1(CCCC(N1C)(C)C)C	155.28	2.3	0	1	3.2	131	0	C10H21N	0	11	0	0	0	0	0	0
Row 1012	LP16	SP190705_15-_20	STF-002248	STF-002248-1	131.1	-31.8	Xamoterol hemifumarate	increase phagocytosis	non-toxic		X 3253	137675	794.864	STF-002248	LP16	ICI 118587; (+/-)-N-[2-[[Hydroxy-3-(4-hydroxy)propyl]amino]ethyl-4-morpholinecarboxamide hemifumarate	Adrenoceptor		Agonist	beta1	Specific beta1-Adrenoceptor specific partial agonist	STF-002248	6440459	6440459					0.0562	70.7946			C1COCCN1C(=O)NCCNCC(COC2=CC=C(C=C2)O)O.C1COCCN1C(=O)NCCNCC(COC2=CC=C(C=C2)O)O.C(=CC(=O)O)C(=O)O	794.846		10	16	281	477	18	C36H54N6O14	0	56	2	0	2	1	1	0
Row 1013	LP03	SP190705_01-_05	STF-001219	STF-001219-1	79.9	3.5	Corticosterone	inactive	non-toxic		C 2505	136646	346.471	STF-001219	LP03	Kendall's Compound B; 4-Pregnene-11beta,21-diol-3,20-dione; Reichstein's Substance H	Hormone			Glucocorticoid	Glucocorticoid secreted by the adrenal cortex; activates both mineralcorticoid and glucocorticoid receptors	STF-001219	5753	5753					0.02	163.7			CC12CCC(=O)C=C1CCC3C2C(CC4(C3CCC4C(=O)CO)C)O	346.461	1.9	2	4	74.6	638	2	C21H30O4	0	25	7	7	0	0	0	0
Row 1014	LP07	SP190705_06-_10	STF-001534	STF-001534-1	96.9	23.1	(-)-Ephedrine hemisulfate	inactive	non-toxic		E 3250	136922	428.552	STF-001534	LP07		Adrenoceptor		Activator		Adrenergic stimulant	STF-001534	69165225	69165225									CC(C(C1=CC=CC=C1)O)NC.CC(C(C1=CC=CC=C1)O)NC	330.464		4	4	64.5	121	6	C20H30N2O2	0	24	4	4	0	0	0	0
Row 1015	LP11	SP190705_11-_15	STF-001851	STF-001851-1	72.4	11.8	Naltrindole hydrochloride	inactive	non-toxic		N-115	137279	450.97	STF-001851	LP11	NTI hydrochloride	Opioid		Antagonist	delta	Highly selective, non-peptide delta opioid receptor antagonist that is active when administered peripherally	STF-001851	11957650	11957650				TRUE	0.1889	56.2341			C1CC1CN2CCC34C5C6=C(CC3(C2CC7=C4C(=C(C=C7)O)O5)O)C8=CC=CC=C8N6	414.496	3.3	3	4	68.7	774	2	C26H26N2O3	0	31	4	2	2	0	0	0
Row 1016	LP15	SP190705_15-_20	STF-002169	STF-002169-1	100.8	-11	Na-p-Tosyl-L-lysine chloromethyl ketone hydrochloride	inactive	non-toxic		T 7254	137596	369.313	STF-002169	LP15	TLCK hydrochloride	Cyclic Nucleotides	Enzyme	Inhibitor	Adenylyl cyclase	Adenylyl cyclase inhibitor; blocks the LPS- or cytokine-induced activation of nuclear factor kB (NFkB)	STF-002169	73094	73094					3.0131	142600			CC1=CC=C(C=C1)S(=O)(=O)NC(CCCCN)C(=O)CCl	332.846	1.8	2	5	97.6	414	9	C14H21ClN2O3S	0	21	1	1	0	0	0	0
Row 1017	LP04	SP190705_01-_05	STF-001297	STF-001297-1	86.8	-3	CPCCOEt	inactive	non-toxic		C 9611	136724	247.253	STF-001297	LP04	7-(Hydroxyimino)cyclopropa[b]chromen-1a-carboxylate ethyl ester	Glutamate		Antagonist	mGluR1	Selective non-competitive mGlu1 glutamate receptor antagonist	STF-001297	6278000	6278000					3.4	100			CCOC(=O)C12CC1C(=NO)C3=CC=CC=C3O2	247.247	1.9	1	5	68.1	395	3	C13H13NO4	0	18	2	0	2	1	1	0
Row 1018	LP08	SP190705_06-_10	STF-001613	STF-001613-1	92.5	-8	SB 228357	inactive	non-toxic		S 2318	137041	431.393	STF-001613	LP08	N-[3-Fluoro-5-(3-pyridinyl)phenyl]-2,3-dihydro-5-methoxy-6-(trifluoromethyl)-1H-indole-1-carboxamide	Serotonin		Antagonist	5-HT2B/2C	Selective 5-HT2B/2C serotonin receptor antagonist.	STF-001613	443390	443390					0.0001	100			COC1=C(C=C2C(=C1)CCN2C(=O)NC3=CC(=CC(=C3)C4=CN=CC=C4)F)C(F)(F)F	431.383	4.2	1	7	54.5	634	3	C22H17F4N3O2	0	31	0	0	0	0	0	0
Row 1019	LP12	SP190705_11-_15	STF-001931	STF-001931-1	105.9	4.7	Pentylenetetrazole	inactive	non-toxic		P 6500	137359	138.173	STF-001931	LP12	Metrazole	Neurotransmission		Modulator	CNS	Non-specific CNS stimulant; convulsant	STF-001931	5917	5917					0.0028	39.8107			C1CCC2=NN=NN2CC1	138.17	0.1	0	3	43.6	116	0	C6H10N4	0	10	0	0	0	0	0	0
Row 102	LP15	SP190705_15-_20	STF-002112	STF-002112-1	108.8	3.7	1-(2-Methoxyphenyl)piperazine hydrochloride	inactive	non-toxic		S-008	137539	228.724	STF-002112	LP15	2-MPP hydrochloride	Serotonin		Agonist	5-HT1 > 5-HT2	Selective 5-HT1 serotonin receptor agonist	STF-002112	1346	1346					0.0012	39.8107			COC1=CC=CC=C1N2CCNCC2	192.258	1.4	1	3	24.5	169	2	C11H16N2O	0	14	0	0	0	0	0	0
Row 1020	LP16	SP190705_15-_20	STF-002249	STF-002249-1	118.5	-26.7	Zardaverine	inactive	non-toxic		Z 3003	137676	268.222	STF-002249	LP16	6-(4-Difluoromethoxy-3-methoxyphenyl)-3(2H)-pyridazinone	Cyclic Nucleotides	Enzyme	Inhibitor	PDE III/ PDE IV	Phosphodiesterase III (PDE III) and phosphodiesterase IV (PDE IV) inhibitor	STF-002249	5723	5723					0.0071	6309570000000			COC1=C(C=CC(=C1)C2=NNC(=O)C=C2)OC(F)F	268.216	2.2	1	6	59.9	398	4	C12H10F2N2O3	0	19	0	0	0	0	0	0
Row 1021	LP01	SP190705_01-_05	STF-001061	STF-001061-1	97	0.9	Tryptamine hydrochloride	inactive	non-toxic		246557	136488	196.682	STF-001061	LP01	3-(2-Aminoethyl)indole hydrochloride	Serotonin		Ligand		Serotonin receptor ligand	STF-001061	1150	1150					0.023	682			C1=CC=C2C(=C1)C(=CN2)CCN	160.216	1.6	2	1	41.8	147	2	C10H12N2	0	12	0	0	0	0	0	0
Row 1024	LP09	SP190705_11-_15	STF-001693	STF-001693-1	90	18	IIK7	inactive	non-toxic		I 5531	137121	348.449	STF-001693	LP09	N-Butanoyl 2-(9-methoxy-6H-isoindolo[2,1-a]indol-11-yl)ethanamine	Melatonin		Agonist		Melatonin receptor agonist	STF-001693	4172142	4172142				TRUE	5e-05	44.6684			CCCC(=O)NCCC1=C2C3=CC=CC=C3CN2C4=C1C=C(C=C4)OC	348.438	3.7	1	2	43.3	497	6	C22H24N2O2	0	26	0	0	0	0	0	0
Row 1025	LP13	SP190705_15-_20	STF-002012	STF-002012-1	82.8	-19.5	Primidone	inactive	non-toxic		P 7295	137440	218.258	STF-002012	LP13		Anticonvulsant				Anticonvulsant	STF-002012	4909	4909					0.0092	89.1251			CCC1(C(=O)NCNC1=O)C2=CC=CC=C2	218.252	0.9	2	2	58.2	279	2	C12H14N2O2	0	16	0	0	0	0	0	0
Row 1026	LP02	SP190705_01-_05	STF-001141	STF-001141-1	111.5	0.1	L-allylglycine	inactive	non-toxic		A 7762	136568	115.133	STF-001141	LP02	L-2-Amino-4-pentenoic acid	Biochemistry	Enzyme	Inhibitor	Glutamic acid decarboxylase	Glutamic acid decarboxylase inhibitor	STF-001141	167529	167529					0.7569	39.8107			C=CCC(C(=O)O)N	115.13	-2.3	2	3	63.3	101	3	C5H9NO2	0	8	1	1	0	0	0	0
Row 1027	LP06	SP190705_06-_10	STF-001456	STF-001456-1	106.2	2.1	R-(-)-Desmethyldeprenyl hydrochloride	inactive	non-toxic		D 6940	136883	209.721	STF-001456	LP06	L-Nordeprenyl hydrochloride	Neurotransmission	Enzyme	Inhibitor	MAO-B	MAO-B inhibitor; metabolite of L-deprenyl	STF-001456	185859	185859					0.8913	37.6858			CC(CC1=CC=CC=C1)NCC#C	173.254	2.3	1	1	12	171	4	C12H15N	0	13	1	1	0	0	0	0
Row 1028	LP10	SP190705_11-_15	STF-001773	STF-001773-1	98.9	6.3	S-(-)-Lisuride	inactive	non-toxic		L-122	137201	338.456	STF-001773	LP10	S(-)-N'-[(8a)-9,10-Didehydro-6-methylergolin-8-yl]-N,N-diethyl-urea	Dopamine		Agonist	D2	D2 Dopamine receptor agonist; alpha- and beta-adrenoceptor antagonist; D1 dopamine receptor antagonist	STF-001773	11957615	11957615				TRUE	0.0032	39.8107			CCN(CC)C(=O)NC1CN(C2CC3=CNC4=CC=CC(=C34)C2=C1)C	338.447	2.7	2	2	51.4	544	3	C20H26N4O	0	25	2	2	0	0	0	0
Row 1029	LP14	SP190705_15-_20	STF-002092	STF-002092-1	86.1	-11.1	Ropinirole hydrochloride	inactive	non-toxic		R 4152	137519	296.843	STF-002092	LP14	SKF 101468; 4-[2-(dipropylamino)ethyl]-1,3-dihydro-2H-indol-2-one hydrochloride	Dopamine		Agonist	D2	Selective D2 dopamine receptor agonist	STF-002092	5095	5095					0.004	89.1251			CCCN(CCC)CCC1=C2CC(=O)NC2=CC=C1	260.375	2.7	1	2	32.3	287	7	C16H24N2O	0	19	0	0	0	0	0	0
Row 103	LP04	SP190705_01-_05	STF-001241	STF-001241-1	93.4	-4.9	Cyclosporin A	inactive	non-toxic		C 3662	136668	1202.64	STF-001241	LP04	Antibiotic S 7481F1	Phosphorylation	Enzyme	Inhibitor	Calcineurin phosphatase	Calcineurin phosphatase inhibitor; immunosuppressant	STF-001241	5280754	5280754					0.0081	79.4328			CCC1C(=O)N(CC(=O)N(C(C(=O)NC(C(=O)N(C(C(=O)NC(C(=O)NC(C(=O)N(C(C(=O)N(C(C(=O)N(C(C(=O)N(C(C(=O)N1)C(C(C)CC=CC)O)C)C(C)C)C)CC(C)C)C)CC(C)C)C)C)C)CC(C)C)C)C(C)C)CC(C)C)C)C	1202.61	7.5	5	12	279	2330	15	C62H111N11O12	0	85	12	0	12	1	1	0
Row 1030	LP01	SP190705_01-_05	STF-001062	STF-001062-1	114.6	-17.9	Arcaine sulfate	inactive	non-toxic		A 0384	136489	270.312	STF-001062	LP01	N,N'-1,4-Butanediylbis(guanidine) sulfate	Glutamate		Antagonist	NMDA-Polyamine	Potent competitive antagonist of the polyamine site on the NMDA glutmate receptor	STF-001062	2227	2227					2.5119	179			C(CCN=C(N)N)CN=C(N)N	172.231	-2.2	4	2	129	145	5	C6H16N6	0	12	0	0	0	0	0	0
[truncated: 1,245 more rows]
[truncated: 4 more columns]

## Sheet: MS Results
Row ID	Compound Plate	Assay Plate	Corp_ID	Sample_ID	Mean % Pos	Mean %Inh	MolName	activity	toxicity	PAINS	Corp_ID	MW	Compound Alias	Comment	RotBonds	Chiral Flag	Batch	Batch_Alias	MW	Vendor	Vendor_ID	Plate	Well	Batch Comment	LogP	LogS	H_acc	H_Don	Ref	Status	Source	STF_ID	CID	CID	PAINS_A	PAINS_B	PAINS_C	PossibleFalseAromaticityDetection	MinAC	MaxAC	MinTC	MaxTC	CanonicalSmiles	MolecularWeight	XLogP	HydrogenBondDonorCount	HydrogenBondAcceptorCount	TPSA	Complexity
[truncated: 1,921 more rows]
[truncated: 14 more columns]
