# Supplementary material for: Beta-2 adrenergic receptor agonism alters astrocyte phagocytic activity and has potential applications to psychiatric disease
Source: Research Square preprint supplement (doi:10.21203/rs.3.rs-2086278/v1), 2022-10-25
Supplement: Supplementary file 4 [file 35fc55669502e72c92ec2f41.xlsx]

## Sheet: global
		16	17	18	19	20	4	5	7	12	15	1	2	9	11	13
		NCAR-Veh	NCAR-Veh	NCAR-Veh	NCAR-Veh	NCAR-Veh	Hemi-Veh	Hemi-Veh	Hemi-Veh	Hemi-Veh	Hemi-Veh	Hemi-Mabuterol	Hemi-Mabuterol	Hemi-Mabuterol	Hemi-Mabuterol	Hemi-Mabuterol
																													Hemi-Mabuterol
Rank_Number	Protein_Name	Out20211012_NSaw_Shamloo_11859_16_211020	Out20211012_NSaw_Shamloo_11859_17_211021	Out20211012_NSaw_Shamloo_11859_18_211021	Out20211012_NSaw_Shamloo_11859_19_211020	Out20211012_NSaw_Shamloo_11859_20_211020	Out20211012_NSaw_Shamloo_11859_4_211021	Out20211012_NSaw_Shamloo_11859_5_211020	Out20211012_NSaw_Shamloo_11859_7_211020	Out20211012_NSaw_Shamloo_11859_12_211021	Out20211012_NSaw_Shamloo_11859_15_211020	Out20211012_NSaw_Shamloo_11859_1_211020	Out20211012_NSaw_Shamloo_11859_2_211020	Out20211012_NSaw_Shamloo_11859_9_211020	Out20211012_NSaw_Shamloo_11859_11_211020	Out20211012_NSaw_Shamloo_11859_13_211020	fold change 5X/WT	ttest 5X			Contaminant	Max	Sum	AAs					Hemi-Mabuterol
1	>sp|Q7TMM9|TBB2A_MOUSE Tubulin beta-2A chain OS=Mus musculus OX=10090 GN=Tubb2a PE=1 SV=1	198	776	170	181	817	130	889	205	151	971	846	182	1005	756	880	1.09524	0.870067	5	5	0	1005	12030	445					Hemi-Propranolol
2	>sp|P68372|TBB4B_MOUSE Tubulin beta-4B chain OS=Mus musculus OX=10090 GN=Tubb4b PE=1 SV=1	896	187	699	757	184	482	175	983	821	233	188	923	248	157	179	0.98935	0.97949	5	5	0	983	8823	445					Hemi-Veh
3	>sp|P63260|ACTG_MOUSE Actin, cytoplasmic 2 OS=Mus musculus OX=10090 GN=Actg1 PE=1 SV=1	17	12	18	14	12	22	8	20	12	14	15	17	897	20	13	1.0411	0.839273	5	5	0	897	2030	375					Hemi-Veh
4	>sp|P60710|ACTB_MOUSE Actin, cytoplasmic 1 OS=Mus musculus OX=10090 GN=Actb PE=1 SV=1	833	871	801	815	746	299	824	792	702	824	822	832	21	797	867	0.846286	0.25487	5	5	0	892	14059	375					Hemi-Propranolol
5	>sp|P68369|TBA1A_MOUSE Tubulin alpha-1A chain OS=Mus musculus OX=10090 GN=Tuba1a PE=1 SV=1	610	772	571	726	598	12	655	688	660	592	541	564	715	610	630	0.795545	0.347369	5	5	0	772	11466	451					Hemi-Veh
6	>sp|P04370-4|MBP_MOUSE Isoform 4 of Myelin basic protein OS=Mus musculus OX=10090 GN=Mbp	723	504	570	608	443	215	413	490	487	686	513	478	423	535	440	0.804424	0.248545	5	5	0	723	9869	195					Hemi-Propranolol
7	>sp|P16858|G3P_MOUSE Glyceraldehyde-3-phosphate dehydrogenase OS=Mus musculus OX=10090 GN=Gapdh PE=1 SV=2	705	635	594	637	601	345	522	635	493	626	647	527	707	545	597	0.826293	0.0861632	5	5	0	708	11915	333					Hemi-Mabuterol
8	>sp|Q6PIC6|AT1A3_MOUSE Sodium/potassium-transporting ATPase subunit alpha-3 OS=Mus musculus OX=10090 GN=Atp1a3 PE=1 SV=1	423	560	496	506	564	244	540	602	471	536	515	603	630	455	524	0.9388	0.655286	5	5	0	654	10497	1013					Hemi-Propranolol
9	>sp|P05213|TBA1B_MOUSE Tubulin alpha-1B chain OS=Mus musculus OX=10090 GN=Tuba1b PE=1 SV=2	16	16	10	10	15	337	23	10	22	16	11	6	11	14	17	6.08955	0.317042	5	5	0	610	1209	451					Hemi-Mabuterol
10	>sp|P56480|ATPB_MOUSE ATP synthase subunit beta, mitochondrial OS=Mus musculus OX=10090 GN=Atp5f1b PE=1 SV=2	455	400	319	449	396	288	451	375	356	444	566	418	426	379	407	0.947994	0.602995	5	5	0	566	8439	529					Hemi-Veh
11	>tr|A3KGU7|A3KGU7_MOUSE Spectrin alpha chain, non-erythrocytic 1 OS=Mus musculus OX=10090 GN=Sptan1 PE=1 SV=1	486	501	534	542	513	350	363	472	420	518	425	434	489	466	432	0.824146	0.0269798	5	5	0	542	9404	2477					Hemi-Mabuterol
12	>sp|O08553|DPYL2_MOUSE Dihydropyrimidinase-related protein 2 OS=Mus musculus OX=10090 GN=Dpysl2 PE=1 SV=2	458	410	384	406	399	234	456	446	380	441	481	470	466	378	410	0.951386	0.657001	5	5	0	510	8572	572					Hemi-Propranolol
13	>sp|P63017|HSP7C_MOUSE Heat shock cognate 71 kDa protein OS=Mus musculus OX=10090 GN=Hspa8 PE=1 SV=1	364	328	349	366	356	208	300	315	294	389	284	338	401	290	390	0.854226	0.121185	5	5	0	461	6945	646					Hemi-Veh
14	>sp|Q04447|KCRB_MOUSE Creatine kinase B-type OS=Mus musculus OX=10090 GN=Ckb PE=1 SV=1	437	447	422	439	355	270	313	400	371	430	346	308	399	416	360	0.849524	0.0961907	5	5	0	447	7602	381					NCAR-Veh
15	>sp|P17182|ENOA_MOUSE Alpha-enolase OS=Mus musculus OX=10090 GN=Eno1 PE=1 SV=3	344	265	268	265	319	227	340	300	252	299	419	287	314	294	287	0.970568	0.747843	5	5	0	440	6269	434					NCAR-Veh
16	>sp|O88935|SYN1_MOUSE Synapsin-1 OS=Mus musculus OX=10090 GN=Syn1 PE=1 SV=2	393	362	396	418	358	262	333	330	327	338	297	345	357	385	339	0.825117	0.00575677	5	5	0	418	7080	706					NCAR-Veh
17	>sp|Q68FD5|CLH1_MOUSE Clathrin heavy chain 1 OS=Mus musculus OX=10090 GN=Cltc PE=1 SV=3	269	359	317	361	375	198	324	404	343	326	357	340	332	296	332	0.94884	0.668945	5	5	0	404	6667	1675					NCAR-Veh
18	>sp|Q03265|ATPA_MOUSE ATP synthase subunit alpha, mitochondrial OS=Mus musculus OX=10090 GN=Atp5f1a PE=1 SV=1	343	303	321	335	350	258	326	335	356	353	351	403	303	354	325	0.985472	0.813331	5	5	0	403	6781	553					NCAR-Veh
19	>sp|P05064|ALDOA_MOUSE Fructose-bisphosphate aldolase A OS=Mus musculus OX=10090 GN=Aldoa PE=1 SV=2	288	307	NaN	267	285	148	NaN	262	NaN	382	NaN	228	280	275	319	0.920663	0.707949	4	3	0	382	3845	364
20	>sp|P48962|ADT1_MOUSE ADP/ATP translocase 1 OS=Mus musculus OX=10090 GN=Slc25a4 PE=1 SV=4	295	377	260	292	294	90	293	264	275	257	303	194	254	267	330	0.77668	0.143235	5	5	0	377	5327	298
21	>sp|Q62261|SPTB2_MOUSE Spectrin beta chain, non-erythrocytic 1 OS=Mus musculus OX=10090 GN=Sptbn1 PE=1 SV=2	323	330	328	343	328	237	250	310	302	352	261	256	321	353	313	0.878329	0.0950251	5	5	0	353	6078	2363
22	>sp|Q91XV3|BASP1_MOUSE Brain acid soluble protein 1 OS=Mus musculus OX=10090 GN=Basp1 PE=1 SV=3	301	221	316	233	159	83	259	179	234	228	222	229	132	269	264	0.799187	0.276464	5	5	0	316	4460	226
23	>sp|O08599|STXB1_MOUSE Syntaxin-binding protein 1 OS=Mus musculus OX=10090 GN=Stxbp1 PE=1 SV=2	237	305	247	236	295	135	243	288	258	271	247	237	283	231	286	0.905303	0.441482	5	5	0	305	5131	594
24	>sp|P52480-2|KPYM_MOUSE Isoform M1 of Pyruvate kinase PKM OS=Mus musculus OX=10090 GN=Pkm	260	235	202	255	232	151	254	253	236	246	247	270	259	246	292	0.962838	0.700277	5	5	0	293	4965	531
25	>tr|A6ZI44|A6ZI44_MOUSE Fructose-bisphosphate aldolase OS=Mus musculus OX=10090 GN=Aldoa PE=1 SV=1	NaN	NaN	275	NaN	NaN	NaN	235	NaN	283	NaN	229	NaN	NaN	NaN	NaN	0.941818	#DIV/0!	1	2	0	286	1530	418
26	>sp|P43006|EAA2_MOUSE Excitatory amino acid transporter 2 OS=Mus musculus OX=10090 GN=Slc1a2 PE=1 SV=1	201	250	217	243	213	86	138	228	214	216	173	123	282	185	258	0.784698	0.135713	5	5	0	282	4091	572
27	>sp|P16330|CN37_MOUSE 2',3'-cyclic-nucleotide 3'-phosphodiesterase OS=Mus musculus OX=10090 GN=Cnp PE=1 SV=3	200	207	253	140	188	92	182	230	161	279	198	215	238	147	NaN	0.955466	0.815379	5	5	0	279	3775	420
28	>sp|P0DP27|CALM2_MOUSE Calmodulin-2 OS=Mus musculus OX=10090 GN=Calm2 PE=1 SV=1	115	74	153	129	39	78	181	63	69	115	242	275	39	217	91	0.992157	0.979289	5	5	0	275	2272	149
29	>tr|A0A668KLC6|A0A668KLC6_MOUSE Microtubule-associated protein 2 OS=Mus musculus OX=10090 GN=Map2 PE=4 SV=1	207	NaN	NaN	NaN	208	NaN	196	NaN	NaN	NaN	NaN	NaN	NaN	NaN	NaN	0.944578	#DIV/0!	2	1	0	266	1085	1989
30	>sp|P20357|MTAP2_MOUSE Microtubule-associated protein 2 OS=Mus musculus OX=10090 GN=Map2 PE=1 SV=2	NaN	221	230	248	NaN	186	NaN	213	173	213	195	209	263	247	216	0.842275	0.0426445	3	4	0	263	3317	1828
31	>sp|Q9JHU4|DYHC1_MOUSE Cytoplasmic dynein 1 heavy chain 1 OS=Mus musculus OX=10090 GN=Dync1h1 PE=1 SV=2	218	254	211	259	234	153	193	238	232	229	207	182	240	228	250	0.888605	0.197933	5	5	0	262	4410	4644
32	>sp|P63101|1433Z_MOUSE 14-3-3 protein zeta/delta OS=Mus musculus OX=10090 GN=Ywhaz PE=1 SV=1	253	255	215	220	220	81	242	234	222	241	188	209	229	218	242	0.877042	0.400072	5	5	0	257	4401	245
33	>sp|P10854|H2B1M_MOUSE Histone H2B type 1-M OS=Mus musculus OX=10090 GN=H2bc14 PE=1 SV=2	228	238	204	203	190	NaN	157	NaN	212	1	NaN	155	154	248	NaN	0.580119	0.110029	5	3	0	248	2317	126
34	>sp|P05202|AATM_MOUSE Aspartate aminotransferase, mitochondrial OS=Mus musculus OX=10090 GN=Got2 PE=1 SV=1	160	158	159	141	234	100	220	190	162	197	222	184	152	125	180	1.01995	0.900287	5	5	0	234	3498	430
35	>sp|Q60932-2|VDAC1_MOUSE Isoform Mt-VDAC1 of Voltage-dependent anion-selective channel protein 1 OS=Mus musculus OX=10090 GN=Vdac1	152	180	157	140	205	114	207	193	182	232	186	181	197	162	205	1.11271	0.435107	5	5	0	232	3699	283
36	>sp|P60202|MYPR_MOUSE Myelin proteolipid protein OS=Mus musculus OX=10090 GN=Plp1 PE=1 SV=2	174	154	152	154	132	34	179	198	162	196	224	200	150	145	157	1.00392	0.985206	5	5	0	224	3216	277
37	>sp|Q64475|H2B1B_MOUSE Histone H2B type 1-B OS=Mus musculus OX=10090 GN=H2bc3 PE=1 SV=3	3	1	2	1	1	NaN	NaN	113	2	218	159	NaN	NaN	1	220	69.375	0.0531514	5	3	0	220	1220	126
38	>sp|P46460|NSF_MOUSE Vesicle-fusing ATPase OS=Mus musculus OX=10090 GN=Nsf PE=1 SV=2	151	178	159	185	219	127	170	167	196	175	175	174	180	172	176	0.936099	0.504889	5	5	0	219	3474	744
39	>tr|A0A0J9YUN4|A0A0J9YUN4_MOUSE Dynamin-1 OS=Mus musculus OX=10090 GN=Dnm1 PE=1 SV=1	181	190	170	193	189	166	189	194	204	190	202	212	203	184	192	1.02167	0.608203	5	5	0	212	3818	864
40	>sp|P17183|ENOG_MOUSE Gamma-enolase OS=Mus musculus OX=10090 GN=Eno2 PE=1 SV=2	208	159	148	163	150	124	165	139	157	154	210	180	129	206	179	0.892512	0.213192	5	5	0	210	3348	434
41	>sp|P63038|CH60_MOUSE 60 kDa heat shock protein, mitochondrial OS=Mus musculus OX=10090 GN=Hspd1 PE=1 SV=1	176	194	177	188	154	122	133	136	160	172	173	155	179	151	161	0.813273	0.0202767	5	5	0	207	3361	573
42	>sp|P07901|HS90A_MOUSE Heat shock protein HSP 90-alpha OS=Mus musculus OX=10090 GN=Hsp90aa1 PE=1 SV=4	113	157	110	172	119	68	100	99	109	107	101	107	104	98	122	0.719821	0.0336089	5	5	0	202	2371	733
43	>sp|P62806|H4_MOUSE Histone H4 OS=Mus musculus OX=10090 GN=H4c1 PE=1 SV=2	74	79	119	80	165	53	164	166	110	174	182	156	151	92	156	1.29014	0.329598	5	5	0	199	2751	103
44	>sp|P16330-2|CN37_MOUSE Isoform CNPI of 2',3'-cyclic-nucleotide 3'-phosphodiesterase OS=Mus musculus OX=10090 GN=Cnp	NaN	NaN	NaN	NaN	NaN	NaN	NaN	NaN	NaN	NaN	NaN	NaN	NaN	NaN	199	#DIV/0!	#DIV/0!	0	0	0	199	199	400
45	>sp|P08249|MDHM_MOUSE Malate dehydrogenase, mitochondrial OS=Mus musculus OX=10090 GN=Mdh2 PE=1 SV=3	141	140	106	145	154	120	185	142	129	128	179	173	131	120	129	1.02624	0.806184	5	5	0	198	2926	338
46	>sp|Q99KI0|ACON_MOUSE Aconitate hydratase, mitochondrial OS=Mus musculus OX=10090 GN=Aco2 PE=1 SV=1	154	183	166	143	188	115	170	196	151	185	161	191	177	159	160	0.979616	0.84284	5	5	0	196	3358	780
47	>sp|Q64332|SYN2_MOUSE Synapsin-2 OS=Mus musculus OX=10090 GN=Syn2 PE=1 SV=2	117	137	137	142	155	93	158	172	138	152	148	140	184	145	155	1.03634	0.745225	5	5	0	194	3028	586
48	>sp|Q9QYR6|MAP1A_MOUSE Microtubule-associated protein 1A OS=Mus musculus OX=10090 GN=Map1a PE=1 SV=2	163	169	NaN	169	142	122	108	NaN	142	3	125	NaN	161	166	NaN	0.583204	0.0789714	4	4	0	192	2308	2776
49	>sp|P16125|LDHB_MOUSE L-lactate dehydrogenase B chain OS=Mus musculus OX=10090 GN=Ldhb PE=1 SV=2	114	127	129	128	155	56	190	132	128	149	137	136	141	121	134	1.00306	0.986391	5	5	0	190	2737	334
50	>sp|Q91ZZ3|SYUB_MOUSE Beta-synuclein OS=Mus musculus OX=10090 GN=Sncb PE=1 SV=1	35	20	26	32	36	83	133	102	37	21	141	122	25	31	34	2.52349	0.0611417	5	5	0	175	1422	133
51	>sp|P62814|VATB2_MOUSE V-type proton ATPase subunit B, brain isoform OS=Mus musculus OX=10090 GN=Atp6v1b2 PE=1 SV=1	148	146	134	134	129	121	145	140	115	149	147	144	136	147	135	0.969609	0.600766	5	5	0	174	2789	511
52	>sp|P05201|AATC_MOUSE Aspartate aminotransferase, cytoplasmic OS=Mus musculus OX=10090 GN=Got1 PE=1 SV=3	133	118	112	87	128	83	148	134	113	141	140	128	116	80	144	1.07093	0.580758	5	5	0	171	2455	413
53	>sp|O55042|SYUA_MOUSE Alpha-synuclein OS=Mus musculus OX=10090 GN=Snca PE=1 SV=2	140	116	128	128	105	41	51	40	135	87	42	38	115	171	125	0.573744	0.0251095	5	5	0	171	1868	140
54	>sp|P11499|HS90B_MOUSE Heat shock protein HSP 90-beta OS=Mus musculus OX=10090 GN=Hsp90ab1 PE=1 SV=3	125	98	134	98	160	116	148	154	147	143	132	170	134	147	167	1.15122	0.204469	5	5	0	170	2783	724
55	>sp|P06745|G6PI_MOUSE Glucose-6-phosphate isomerase OS=Mus musculus OX=10090 GN=Gpi PE=1 SV=4	149	149	135	130	168	118	148	135	151	139	159	115	132	136	124	0.94528	0.391147	5	5	0	168	2796	558
56	>sp|P05063|ALDOC_MOUSE Fructose-bisphosphate aldolase C OS=Mus musculus OX=10090 GN=Aldoc PE=1 SV=4	114	104	84	102	100	57	135	124	108	168	124	99	138	107	94	1.1746	0.378026	5	5	0	168	2308	363
57	>sp|P61982|1433G_MOUSE 14-3-3 protein gamma OS=Mus musculus OX=10090 GN=Ywhag PE=1 SV=2	109	150	134	167	167	37	147	135	60	56	126	128	109	57	127	0.598349	0.047735	5	5	0	167	2204	247
58	>sp|P50516|VATA_MOUSE V-type proton ATPase catalytic subunit A OS=Mus musculus OX=10090 GN=Atp6v1a PE=1 SV=2	130	156	125	138	161	100	138	123	165	137	121	120	138	147	151	0.933803	0.482546	5	5	0	165	2754	617
59	>sp|Q9QYR6-2|MAP1A_MOUSE Isoform 2 of Microtubule-associated protein 1A OS=Mus musculus OX=10090 GN=Map1a	NaN	NaN	165	NaN	NaN	NaN	NaN	162	NaN	NaN	NaN	129	NaN	NaN	140	0.981818	#DIV/0!	1	1	0	165	596	3000
60	>tr|Q68FG2|Q68FG2_MOUSE Spectrin beta chain OS=Mus musculus OX=10090 GN=Sptbn2 PE=1 SV=1	103	152	139	163	136	87	103	114	110	110	100	102	132	135	130	0.756133	0.0166014	5	5	0	163	2405	2388
61	>sp|P62874|GBB1_MOUSE Guanine nucleotide-binding protein G(I)/G(S)/G(T) subunit beta-1 OS=Mus musculus OX=10090 GN=Gnb1 PE=1 SV=3	114	126	109	117	139	40	129	129	81	121	156	82	160	89	123	0.826446	0.282446	5	5	0	160	2314	340
62	>sp|Q9DB77|QCR2_MOUSE Cytochrome b-c1 complex subunit 2, mitochondrial OS=Mus musculus OX=10090 GN=Uqcrc2 PE=1 SV=1	141	139	116	125	129	63	118	84	132	125	94	81	115	99	159	0.803077	0.105061	5	5	0	159	2322	453
63	>tr|A2ARP8|A2ARP8_MOUSE Microtubule-associated protein 1A OS=Mus musculus OX=10090 GN=Map1a PE=1 SV=1	NaN	NaN	NaN	NaN	NaN	NaN	NaN	NaN	NaN	158	NaN	NaN	NaN	NaN	NaN	#DIV/0!	#DIV/0!	0	1	0	158	158	3014
64	>sp|Q9R0P9|UCHL1_MOUSE Ubiquitin carboxyl-terminal hydrolase isozyme L1 OS=Mus musculus OX=10090 GN=Uchl1 PE=1 SV=1	122	130	133	113	156	49	77	110	109	104	95	99	106	127	134	0.686544	0.0181933	5	5	0	156	2195	223
65	>sp|P18872|GNAO_MOUSE Guanine nucleotide-binding protein G(o) subunit alpha OS=Mus musculus OX=10090 GN=Gnao1 PE=1 SV=3	120	146	146	135	151	65	128	142	124	143	124	4	139	130	136	0.862464	0.247351	5	5	0	155	2525	354
66	>tr|S4R2F3|S4R2F3_MOUSE Ankyrin-2 OS=Mus musculus OX=10090 GN=Ank2 PE=1 SV=3	NaN	129	NaN	NaN	140	NaN	NaN	NaN	NaN	NaN	NaN	NaN	NaN	7	NaN	#DIV/0!	#DIV/0!	2	0	0	155	431	3926
67	>sp|P18872-2|GNAO_MOUSE Isoform Alpha-2 of Guanine nucleotide-binding protein G(o) subunit alpha OS=Mus musculus OX=10090 GN=Gnao1	NaN	4	5	2	3	2	4	3	5	3	2	155	2	3	3	0.971429	0.905188	4	5	0	155	205	354
68	>sp|P14152|MDHC_MOUSE Malate dehydrogenase, cytoplasmic OS=Mus musculus OX=10090 GN=Mdh1 PE=1 SV=3	123	94	103	105	124	97	130	130	119	121	150	123	107	113	101	1.08743	0.288166	5	5	0	154	2359	334
69	>sp|Q8C8R3-2|ANK2_MOUSE Isoform 2 of Ankyrin-2 OS=Mus musculus OX=10090 GN=Ank2	139	NaN	143	144	NaN	3	5	145	125	142	120	113	146	NaN	132	0.591549	0.233639	3	5	0	154	1893	3926
70	>sp|P17751|TPIS_MOUSE Triosephosphate isomerase OS=Mus musculus OX=10090 GN=Tpi1 PE=1 SV=4	127	129	140	129	150	64	129	123	137	134	142	121	126	103	149	0.86963	0.251943	5	5	0	150	2578	299
71	>sp|P14873|MAP1B_MOUSE Microtubule-associated protein 1B OS=Mus musculus OX=10090 GN=Map1b PE=1 SV=2	117	113	141	150	138	99	110	119	106	112	90	120	143	113	147	0.828528	0.0210301	5	5	0	150	2451	2464
72	>sp|P11798|KCC2A_MOUSE Calcium/calmodulin-dependent protein kinase type II subunit alpha OS=Mus musculus OX=10090 GN=Camk2a PE=1 SV=2	90	130	113	127	144	68	128	106	144	122	113	114	114	121	148	0.940397	0.661263	5	5	0	149	2403	478
73	>sp|P15105|GLNA_MOUSE Glutamine synthetase OS=Mus musculus OX=10090 GN=Glul PE=1 SV=6	122	138	128	118	107	46	136	130	112	111	112	94	117	129	118	0.872757	0.381012	5	5	0	149	2295	373
74	>sp|P17710-3|HXK1_MOUSE Isoform HK1 of Hexokinase-1 OS=Mus musculus OX=10090 GN=Hk1	120	144	126	143	141	87	116	119	147	117	115	116	129	133	144	0.869436	0.138754	5	5	0	147	2524	918
75	>sp|P09411|PGK1_MOUSE Phosphoglycerate kinase 1 OS=Mus musculus OX=10090 GN=Pgk1 PE=1 SV=4	132	140	114	127	136	82	122	124	119	140	117	102	114	121	135	0.904468	0.274636	5	5	0	140	2444	417
76	>sp|P62259|1433E_MOUSE 14-3-3 protein epsilon OS=Mus musculus OX=10090 GN=Ywhae PE=1 SV=1	68	74	84	81	101	57	111	106	94	106	111	103	83	66	97	1.16176	0.277614	5	5	0	140	1903	255
77	>sp|P46660|AINX_MOUSE Alpha-internexin OS=Mus musculus OX=10090 GN=Ina PE=1 SV=3	120	99	111	102	111	86	133	129	84	130	109	130	132	99	121	1.03499	0.755917	5	5	0	139	2313	501
78	>sp|Q8VEM8|MPCP_MOUSE Phosphate carrier protein, mitochondrial OS=Mus musculus OX=10090 GN=Slc25a3 PE=1 SV=1	101	120	90	78	127	40	106	138	87	128	124	94	113	60	135	0.967054	0.866698	5	5	0	138	2141	357
79	>sp|Q02053|UBA1_MOUSE Ubiquitin-like modifier-activating enzyme 1 OS=Mus musculus OX=10090 GN=Uba1 PE=1 SV=1	88	129	105	120	108	70	81	112	89	115	99	87	117	95	138	0.849091	0.176462	5	5	0	138	2068	1058
80	>sp|Q9DBG3-2|AP2B1_MOUSE Isoform 2 of AP-2 complex subunit beta OS=Mus musculus OX=10090 GN=Ap2b1	NaN	NaN	NaN	NaN	NaN	NaN	NaN	NaN	137	NaN	NaN	NaN	NaN	NaN	NaN	#DIV/0!	#DIV/0!	0	1	0	137	137	951
81	>sp|P26443|DHE3_MOUSE Glutamate dehydrogenase 1, mitochondrial OS=Mus musculus OX=10090 GN=Glud1 PE=1 SV=1	102	130	118	98	135	76	104	126	101	110	111	128	94	106	126	0.886792	0.261759	5	5	0	135	2214	558
82	>sp|P12960|CNTN1_MOUSE Contactin-1 OS=Mus musculus OX=10090 GN=Cntn1 PE=1 SV=1	134	114	110	95	124	96	110	115	119	102	99	110	102	115	113	0.939341	0.396356	5	5	0	134	2223	1020
83	>sp|Q9CZU6|CISY_MOUSE Citrate synthase, mitochondrial OS=Mus musculus OX=10090 GN=Cs PE=1 SV=1	114	126	89	134	112	75	91	98	102	107	96	101	95	116	119	0.822609	0.0628634	5	5	0	134	2102	464
84	>sp|P30275|KCRU_MOUSE Creatine kinase U-type, mitochondrial OS=Mus musculus OX=10090 GN=Ckmt1 PE=1 SV=1	116	78	101	133	88	101	79	85	101	89	111	106	91	76	80	0.881783	0.288849	5	5	0	133	1858	418
85	>sp|P14094|AT1B1_MOUSE Sodium/potassium-transporting ATPase subunit beta-1 OS=Mus musculus OX=10090 GN=Atp1b1 PE=1 SV=1	125	111	90	101	114	57	110	103	105	124	91	118	102	101	130	0.922366	0.529396	5	5	0	131	2156	304
86	>sp|Q9DBJ1|PGAM1_MOUSE Phosphoglycerate mutase 1 OS=Mus musculus OX=10090 GN=Pgam1 PE=1 SV=3	98	110	88	113	99	74	79	95	86	109	100	89	106	109	101	0.872047	0.128233	5	5	0	131	1993	254
87	>sp|Q9ERD7|TBB3_MOUSE Tubulin beta-3 chain OS=Mus musculus OX=10090 GN=Tubb3 PE=1 SV=1	119	118	97	118	107	85	103	110	110	130	88	114	108	110	94	0.962433	0.631107	5	5	0	130	2165	450
88	>sp|Q6GSS7|H2A2A_MOUSE Histone H2A type 2-A OS=Mus musculus OX=10090 GN=Hist2h2aa1 PE=1 SV=3	56	40	4	58	88	4	82	64	53	73	107	112	72	41	71	1.12195	0.764534	5	5	0	130	1345	130
89	>sp|Q9Z1G4-2|VPP1_MOUSE Isoform A1-I of V-type proton ATPase 116 kDa subunit a1 OS=Mus musculus OX=10090 GN=Atp6v0a1	91	129	101	97	103	68	83	94	110	80	81	79	100	99	127	0.834933	0.112076	5	5	0	129	1914	838
90	>sp|Q8VDN2|AT1A1_MOUSE Sodium/potassium-transporting ATPase subunit alpha-1 OS=Mus musculus OX=10090 GN=Atp1a1 PE=1 SV=1	78	111	92	117	116	72	113	108	93	83	105	128	101	100	75	0.912451	0.429289	5	5	0	128	1975	1023
91	>sp|Q63810|CANB1_MOUSE Calcineurin subunit B type 1 OS=Mus musculus OX=10090 GN=Ppp3r1 PE=1 SV=3	112	84	92	83	50	52	49	56	75	95	126	85	77	97	86	0.776722	0.19363	5	5	0	126	1646	170
92	>sp|Q61644|PACN1_MOUSE Protein kinase C and casein kinase substrate in neurons protein 1 OS=Mus musculus OX=10090 GN=Pacsin1 PE=1 SV=1	112	97	92	125	72	55	64	82	86	79	68	73	75	107	90	0.73494	0.0397321	5	5	0	125	1631	441
93	>sp|Q8C8R3-4|ANK2_MOUSE Isoform 4 of Ankyrin-2 OS=Mus musculus OX=10090 GN=Ank2	3	3	3	4	3	95	98	3	1	3	3	5	5	125	4	12.5	0.149418	5	5	0	125	383	3959
94	>sp|Q9CQV8|1433B_MOUSE 14-3-3 protein beta/alpha OS=Mus musculus OX=10090 GN=Ywhab PE=1 SV=3	49	42	27	43	35	54	37	45	107	89	33	33	43	55	51	1.69388	0.0879574	5	5	0	124	1091	246
95	>sp|P50396|GDIA_MOUSE Rab GDP dissociation inhibitor alpha OS=Mus musculus OX=10090 GN=Gdi1 PE=1 SV=3	103	108	92	101	109	75	120	111	107	96	115	103	107	103	117	0.992203	0.925644	5	5	0	120	2083	447
96	>sp|Q9DBG3|AP2B1_MOUSE AP-2 complex subunit beta OS=Mus musculus OX=10090 GN=Ap2b1 PE=1 SV=1	66	115	79	102	110	64	104	101	NaN	88	76	74	103	94	119	0.945445	0.71071	5	4	0	119	1769	937
97	>sp|Q9QXS1-6|PLEC_MOUSE Isoform PLEC-0,1C of Plectin OS=Mus musculus OX=10090 GN=Plec	108	NaN	119	116	105	NaN	78	90	94	105	NaN	78	107	106	104	0.819196	0.0203628	4	4	0	119	1577	4572
98	>sp|P62984|RL40_MOUSE Ubiquitin-60S ribosomal protein L40 OS=Mus musculus OX=10090 GN=Uba52 PE=1 SV=2	106	93	61	99	68	48	NaN	79	100	104	91	65	62	93	NaN	0.96897	0.865454	5	4	0	119	1360	128
99	>sp|P62631|EF1A2_MOUSE Elongation factor 1-alpha 2 OS=Mus musculus OX=10090 GN=Eef1a2 PE=1 SV=1	48	61	49	63	60	34	99	98	98	50	106	47	117	84	55	1.34875	0.2102	5	5	0	117	1535	463
100	>sp|P10126|EF1A1_MOUSE Elongation factor 1-alpha 1 OS=Mus musculus OX=10090 GN=Eef1a1 PE=1 SV=3	85	113	114	96	116	59	47	50	65	106	48	94	51	61	102	0.624046	0.0124135	5	5	0	116	1477	462
101	>sp|Q9QXS1|PLEC_MOUSE Plectin OS=Mus musculus OX=10090 GN=Plec PE=1 SV=3	NaN	116	NaN	NaN	NaN	89	NaN	NaN	NaN	NaN	88	NaN	NaN	NaN	NaN	0.767241	#DIV/0!	1	1	0	116	293	4691
102	>sp|P17742|PPIA_MOUSE Peptidyl-prolyl cis-trans isomerase A OS=Mus musculus OX=10090 GN=Ppia PE=1 SV=2	86	75	77	88	92	73	106	95	92	93	113	115	94	88	91	1.09809	0.225576	5	5	0	115	1895	164
103	>sp|Q7TSJ2|MAP6_MOUSE Microtubule-associated protein 6 OS=Mus musculus OX=10090 GN=Map6 PE=1 SV=2	104	87	113	94	83	75	67	59	64	75	40	61	66	115	68	0.706861	0.00213638	5	5	0	115	1521	906
104	>tr|A0A0A6YY91|A0A0A6YY91_MOUSE Neural cell adhesion molecule 1 (Fragment) OS=Mus musculus OX=10090 GN=Ncam1 PE=1 SV=1	80	4	76	67	76	4	3	91	80	1	6	82	1	60	2	0.590759	0.348312	5	5	0	115	1022	1089
105	>sp|O08749|DLDH_MOUSE Dihydrolipoyl dehydrogenase, mitochondrial OS=Mus musculus OX=10090 GN=Dld PE=1 SV=2	101	99	114	107	109	76	92	85	87	107	96	83	99	107	95	0.843396	0.0208367	5	5	0	114	1870	509
106	>sp|P63011|RAB3A_MOUSE Ras-related protein Rab-3A OS=Mus musculus OX=10090 GN=Rab3a PE=1 SV=1	67	67	47	66	71	47	99	97	70	75	112	100	76	62	62	1.22013	0.218132	5	5	0	112	1533	220
107	>sp|Q9CZ13|QCR1_MOUSE Cytochrome b-c1 complex subunit 1, mitochondrial OS=Mus musculus OX=10090 GN=Uqcrc1 PE=1 SV=2	83	87	79	92	111	61	91	103	90	100	102	83	98	85	106	0.984513	0.884047	5	5	0	111	1839	480
108	>sp|P08551|NFL_MOUSE Neurofilament light polypeptide OS=Mus musculus OX=10090 GN=Nefl PE=1 SV=5	100	90	98	85	78	65	74	94	109	98	80	81	68	88	87	0.97561	0.813869	5	5	0	109	1754	543
109	>sp|Q6PIE5|AT1A2_MOUSE Sodium/potassium-transporting ATPase subunit alpha-2 OS=Mus musculus OX=10090 GN=Atp1a2 PE=1 SV=1	94	101	84	84	86	64	72	86	80	97	68	84	80	100	94	0.888641	0.167854	5	5	0	108	1698	1020
110	>sp|P08553|NFM_MOUSE Neurofilament medium polypeptide OS=Mus musculus OX=10090 GN=Nefm PE=1 SV=4	101	88	96	NaN	84	91	71	89	94	98	80	86	86	92	84	0.960434	0.578252	4	5	0	108	1692	848
111	>sp|Q9QXS1-8|PLEC_MOUSE Isoform PLEC-0,1C,2A,3A of Plectin OS=Mus musculus OX=10090 GN=Plec	NaN	NaN	NaN	NaN	NaN	NaN	NaN	NaN	NaN	NaN	NaN	NaN	NaN	NaN	NaN	#DIV/0!	#DIV/0!	0	0	0	108	108	4589
112	>sp|Q01853|TERA_MOUSE Transitional endoplasmic reticulum ATPase OS=Mus musculus OX=10090 GN=Vcp PE=1 SV=4	84	107	78	91	105	72	97	96	82	82	93	94	97	77	92	0.922581	0.35981	5	5	0	107	1841	806
113	>sp|Q7TPR4|ACTN1_MOUSE Alpha-actinin-1 OS=Mus musculus OX=10090 GN=Actn1 PE=1 SV=1	72	90	77	86	89	32	NaN	NaN	NaN	84	82	NaN	NaN	86	107	0.700483	0.158712	5	2	0	107	1053	892
114	>sp|P13595|NCAM1_MOUSE Neural cell adhesion molecule 1 OS=Mus musculus OX=10090 GN=Ncam1 PE=1 SV=3	5	78	3	7	4	75	107	6	3	81	103	4	98	3	76	2.80412	0.209952	5	5	0	107	754	1115
115	>tr|Q6P1J1|Q6P1J1_MOUSE Crmp1 protein OS=Mus musculus OX=10090 GN=Crmp1 PE=1 SV=1	82	92	71	76	92	80	101	99	71	92	89	97	87	65	92	1.07264	0.423548	5	5	0	106	1763	686
116	>sp|P46096|SYT1_MOUSE Synaptotagmin-1 OS=Mus musculus OX=10090 GN=Syt1 PE=1 SV=1	66	87	66	87	99	61	82	91	95	79	106	97	90	66	83	1.00741	0.947253	5	5	0	106	1733	421
117	>sp|P60879|SNP25_MOUSE Synaptosomal-associated protein 25 OS=Mus musculus OX=10090 GN=Snap25 PE=1 SV=1	65	68	68	60	85	67	63	73	57	100	69	73	65	50	82	1.04046	0.752417	5	5	0	106	1471	206
118	>sp|Q9R0K7|AT2B2_MOUSE Plasma membrane calcium-transporting ATPase 2 OS=Mus musculus OX=10090 GN=Atp2b2 PE=1 SV=2	83	105	85	100	98	57	36	80	91	68	38	NaN	81	78	96	0.704883	0.0286826	5	5	0	105	1348	1198
119	>tr|A8DUK4|A8DUK4_MOUSE Beta-globin OS=Mus musculus OX=10090 GN=Hbb-bs PE=1 SV=1	29	18	19	8	NaN	7	22	NaN	NaN	NaN	104	30	15	17	8	0.783784	0.639574	4	2	0	104	392	147
120	>sp|P99024|TBB5_MOUSE Tubulin beta-5 chain OS=Mus musculus OX=10090 GN=Tubb5 PE=1 SV=1	65	68	59	55	89	48	85	74	58	99	74	84	103	64	78	1.08333	0.620681	5	5	0	103	1524	444
121	>tr|A0A0R4J036|A0A0R4J036_MOUSE Neurofilament medium polypeptide OS=Mus musculus OX=10090 GN=Nefm PE=1 SV=1	NaN	NaN	NaN	102	NaN	NaN	NaN	NaN	NaN	NaN	NaN	NaN	NaN	NaN	NaN	#DIV/0!	#DIV/0!	1	0	0	102	102	848
122	>sp|O88737|BSN_MOUSE Protein bassoon OS=Mus musculus OX=10090 GN=Bsn PE=1 SV=4	61	79	86	101	68	67	50	75	59	58	50	58	74	93	62	0.782278	0.0688638	5	5	0	101	1389	3942
123	>sp|Q8BH59|CMC1_MOUSE Calcium-binding mitochondrial carrier protein Aralar1 OS=Mus musculus OX=10090 GN=Slc25a12 PE=1 SV=1	62	87	72	82	100	50	84	84	74	88	88	89	64	68	85	0.942928	0.63995	5	5	0	100	1562	677
124	>sp|P10853|H2B1F_MOUSE Histone H2B type 1-F/J/L OS=Mus musculus OX=10090 GN=H2bc7 PE=1 SV=2	NaN	NaN	NaN	NaN	NaN	100	NaN	NaN	NaN	NaN	NaN	NaN	NaN	NaN	NaN	#DIV/0!	#DIV/0!	0	1	0	100	100	126
125	>sp|P03995|GFAP_MOUSE Glial fibrillary acidic protein OS=Mus musculus OX=10090 GN=Gfap PE=1 SV=4	40	29	29	24	36	71	NaN	52	65	55	77	57	71	58	77	1.92247	0.000668693	5	4	0	99	1128	430
126	>sp|Q9D6R2|IDH3A_MOUSE Isocitrate dehydrogenase [NAD] subunit alpha, mitochondrial OS=Mus musculus OX=10090 GN=Idh3a PE=1 SV=1	97	87	89	94	86	65	89	94	76	95	83	85	88	82	88	0.924945	0.302056	5	5	0	97	1646	366
127	>sp|P70296|PEBP1_MOUSE Phosphatidylethanolamine-binding protein 1 OS=Mus musculus OX=10090 GN=Pebp1 PE=1 SV=3	97	76	73	92	73	41	79	60	81	75	68	71	67	87	82	0.817518	0.137418	5	5	0	97	1495	187
128	>sp|P63328|PP2BA_MOUSE Serine/threonine-protein phosphatase 2B catalytic subunit alpha isoform OS=Mus musculus OX=10090 GN=Ppp3ca PE=1 SV=1	72	78	95	78	70	58	62	86	77	87	83	72	85	89	78	0.941476	0.553954	5	5	0	96	1577	521
129	>sp|P10637-5|TAU_MOUSE Isoform Tau-D of Microtubule-associated protein tau OS=Mus musculus OX=10090 GN=Mapt	85	63	94	87	96	54	6	68	57	84	4	4	82	4	71	0.632941	0.0609174	5	5	0	96	1105	372
130	>tr|E9Q4P0|E9Q4P0_MOUSE KxDL motif-containing protein 1 (Fragment) OS=Mus musculus OX=10090 GN=Kxd1 PE=1 SV=1	NaN	NaN	NaN	NaN	NaN	NaN	80	NaN	NaN	NaN	NaN	NaN	NaN	NaN	96	#DIV/0!	#DIV/0!	0	1	0	96	338	193
131	>sp|P17426-2|AP2A1_MOUSE Isoform B of AP-2 complex subunit alpha-1 OS=Mus musculus OX=10090 GN=Ap2a1	67	93	65	1	84	NaN	NaN	NaN	NaN	70	2	NaN	NaN	1	79	1.12903	#DIV/0!	5	1	0	93	639	955
132	>sp|Q8BYI9|TENR_MOUSE Tenascin-R OS=Mus musculus OX=10090 GN=Tnr PE=1 SV=2	72	72	75	77	77	70	78	81	71	74	81	63	71	60	84	1.00268	0.934723	5	5	0	91	1502	1358
133	>sp|P50518|VATE1_MOUSE V-type proton ATPase subunit E 1 OS=Mus musculus OX=10090 GN=Atp6v1e1 PE=1 SV=2	83	66	67	67	72	57	54	54	75	72	55	52	64	91	72	0.878873	0.161973	5	5	0	91	1361	226
134	>sp|Q61879|MYH10_MOUSE Myosin-10 OS=Mus musculus OX=10090 GN=Myh10 PE=1 SV=2	80	91	85	87	76	55	NaN	70	54	79	59	70	85	85	80	0.76969	0.0159002	5	4	0	91	1358	1976
135	>tr|A1BN54|A1BN54_MOUSE Alpha actinin 1a OS=Mus musculus OX=10090 GN=Actn1 PE=1 SV=1	NaN	NaN	NaN	1	NaN	NaN	66	90	78	NaN	NaN	75	84	NaN	NaN	78	#DIV/0!	1	3	0	90	547	887
136	>sp|P01831|THY1_MOUSE Thy-1 membrane glycoprotein OS=Mus musculus OX=10090 GN=Thy1 PE=1 SV=1	50	35	46	31	51	25	79	65	42	45	56	88	36	40	44	1.20188	0.425894	5	5	0	88	1001	162
137	>sp|O88569|ROA2_MOUSE Heterogeneous nuclear ribonucleoproteins A2/B1 OS=Mus musculus OX=10090 GN=Hnrnpa2b1 PE=1 SV=2	80	80	70	77	62	48	62	60	56	62	NaN	56	74	87	79	0.780488	0.00590069	5	5	0	87	1296	353
138	>sp|P17426|AP2A1_MOUSE AP-2 complex subunit alpha-1 OS=Mus musculus OX=10090 GN=Ap2a1 PE=1 SV=1	1	1	1	75	NaN	43	77	66	84	NaN	69	47	87	70	2	3.46154	0.05826	4	4	0	87	759	977
139	>sp|Q60930|VDAC2_MOUSE Voltage-dependent anion-selective channel protein 2 OS=Mus musculus OX=10090 GN=Vdac2 PE=1 SV=2	58	72	71	68	75	23	52	57	69	61	54	62	74	59	86	0.761628	0.0861909	5	5	0	86	1254	295
140	>sp|P06151|LDHA_MOUSE L-lactate dehydrogenase A chain OS=Mus musculus OX=10090 GN=Ldha PE=1 SV=3	53	85	67	66	70	40	67	62	54	81	NaN	NaN	82	52	86	0.891496	0.410053	5	5	0	86	1236	332
141	>sp|P68368|TBA4A_MOUSE Tubulin alpha-4A chain OS=Mus musculus OX=10090 GN=Tuba4a PE=1 SV=1	45	59	64	48	73	42	NaN	62	53	58	54	86	65	50	66	0.929931	0.579381	5	4	0	86	1130	448
142	>sp|Q91VD9|NDUS1_MOUSE NADH-ubiquinone oxidoreductase 75 kDa subunit, mitochondrial OS=Mus musculus OX=10090 GN=Ndufs1 PE=1 SV=2	80	72	64	85	76	68	66	71	79	65	58	60	81	66	71	0.925729	0.235958	5	5	0	85	1415	727
143	>sp|Q76MZ3|2AAA_MOUSE Serine/threonine-protein phosphatase 2A 65 kDa regulatory subunit A alpha isoform OS=Mus musculus OX=10090 GN=Ppp2r1a PE=1 SV=3	63	71	58	84	70	53	51	62	79	63	60	49	76	71	80	0.890173	0.284507	5	5	0	84	1335	589
144	>sp|P68254|1433T_MOUSE 14-3-3 protein theta OS=Mus musculus OX=10090 GN=Ywhaq PE=1 SV=1	31	34	24	44	35	16	37	33	50	39	20	26	34	84	40	1.04167	0.832322	5	5	0	84	694	245
145	>sp|P61922|GABT_MOUSE 4-aminobutyrate aminotransferase, mitochondrial OS=Mus musculus OX=10090 GN=Abat PE=1 SV=1	76	74	67	72	78	81	68	57	81	72	73	58	77	73	80	0.978202	0.750851	5	5	0	83	1486	500
146	>tr|A2A5Y6|A2A5Y6_MOUSE Microtubule-associated protein OS=Mus musculus OX=10090 GN=Mapt PE=1 SV=1	NaN	NaN	NaN	NaN	NaN	NaN	1	NaN	NaN	NaN	NaN	3	NaN	83	NaN	#DIV/0!	#DIV/0!	0	1	0	83	87	749
147	>sp|P17427|AP2A2_MOUSE AP-2 complex subunit alpha-2 OS=Mus musculus OX=10090 GN=Ap2a2 PE=1 SV=2	42	46	50	55	53	57	50	76	54	52	44	63	56	43	51	1.1748	0.140145	5	5	0	82	1104	938
148	>sp|Q8CI94|PYGB_MOUSE Glycogen phosphorylase, brain form OS=Mus musculus OX=10090 GN=Pygb PE=1 SV=3	47	67	46	67	64	47	65	63	73	69	62	53	70	56	73	1.08935	0.45015	5	5	0	81	1256	843
149	>tr|E9Q1G8|E9Q1G8_MOUSE Septin-7 OS=Mus musculus OX=10090 GN=Septin7 PE=1 SV=2	NaN	74	67	71	NaN	66	65	NaN	68	NaN	NaN	NaN	NaN	81	NaN	0.938679	0.121579	3	3	0	81	555	437
150	>tr|A0A1L1STE6|A0A1L1STE6_MOUSE Isocitrate dehydrogenase [NAD] subunit, mitochondrial OS=Mus musculus OX=10090 GN=Idh3a PE=1 SV=1	NaN	NaN	NaN	NaN	NaN	NaN	NaN	NaN	NaN	NaN	NaN	NaN	NaN	NaN	NaN	#DIV/0!	#DIV/0!	0	0	0	81	81	384
151	>sp|Q810U3|NFASC_MOUSE Neurofascin OS=Mus musculus OX=10090 GN=Nfasc PE=1 SV=1	62	70	62	71	65	66	57	75	56	72	61	69	69	51	60	0.987879	0.856848	5	5	0	80	1323	1240
152	>sp|Q8CAQ8|MIC60_MOUSE MICOS complex subunit Mic60 OS=Mus musculus OX=10090 GN=Immt PE=1 SV=1	71	53	74	80	NaN	6	54	51	7	6	53	41	74	62	52	0.356835	0.0143286	4	5	0	80	865	757
153	>tr|A0A0A0MQA5|A0A0A0MQA5_MOUSE Tubulin alpha chain (Fragment) OS=Mus musculus OX=10090 GN=Tuba4a PE=1 SV=1	NaN	NaN	NaN	NaN	NaN	NaN	80	NaN	NaN	NaN	NaN	NaN	NaN	NaN	NaN	#DIV/0!	#DIV/0!	0	1	0	80	80	477
154	>sp|P58252|EF2_MOUSE Elongation factor 2 OS=Mus musculus OX=10090 GN=Eef2 PE=1 SV=2	54	79	65	70	67	47	45	53	62	64	56	41	76	65	66	0.808955	0.0506709	5	5	0	79	1191	858
155	>tr|E9Q7S0|E9Q7S0_MOUSE Synaptojanin-1 OS=Mus musculus OX=10090 GN=Synj1 PE=1 SV=1	51	NaN	NaN	79	NaN	NaN	NaN	NaN	NaN	NaN	NaN	NaN	NaN	46	NaN	#DIV/0!	#DIV/0!	2	0	0	79	309	1309
156	>sp|Q9D6F9|TBB4A_MOUSE Tubulin beta-4A chain OS=Mus musculus OX=10090 GN=Tubb4a PE=1 SV=3	56	52	37	51	48	46	76	72	46	62	53	67	47	40	57	1.2377	0.139877	5	5	0	78	1101	444
157	>tr|A0A338P6R8|A0A338P6R8_MOUSE Predicted gene, 49601 OS=Mus musculus OX=10090 GN=Gm49601 PE=3 SV=1	59	7	68	62	78	NaN	49	57	55	75	67	52	54	75	56	1.07664	0.785866	5	4	0	78	935	365
158	>sp|P38647|GRP75_MOUSE Stress-70 protein, mitochondrial OS=Mus musculus OX=10090 GN=Hspa9 PE=1 SV=3	71	54	61	55	72	72	61	77	51	62	57	73	59	62	66	1.03195	0.745131	5	5	0	77	1294	679
159	>sp|Q60597-3|ODO1_MOUSE Isoform 3 of 2-oxoglutarate dehydrogenase, mitochondrial OS=Mus musculus OX=10090 GN=Ogdh	NaN	1	NaN	NaN	77	NaN	NaN	1	NaN	NaN	1	60	72	1	1	0.025641	#DIV/0!	2	1	0	77	341	1038
160	>tr|E9Q9F5|E9Q9F5_MOUSE Septin-7 OS=Mus musculus OX=10090 GN=Septin7 PE=1 SV=2	NaN	NaN	NaN	NaN	NaN	NaN	NaN	NaN	NaN	NaN	NaN	NaN	NaN	NaN	NaN	#DIV/0!	#DIV/0!	0	0	0	77	77	437
161	>sp|P97807|FUMH_MOUSE Fumarate hydratase, mitochondrial OS=Mus musculus OX=10090 GN=Fh PE=1 SV=3	61	57	51	48	59	43	63	58	52	59	56	58	62	48	61	0.996377	0.963698	5	5	0	76	1160	507
162	>tr|Q6GT24|Q6GT24_MOUSE Peroxiredoxin OS=Mus musculus OX=10090 GN=Prdx6 PE=1 SV=1	52	47	42	48	62	NaN	61	64	62	50	58	NaN	58	57	66	1.18028	0.0955202	5	4	0	76	1061	224
163	>sp|Q60597|ODO1_MOUSE 2-oxoglutarate dehydrogenase, mitochondrial OS=Mus musculus OX=10090 GN=Ogdh PE=1 SV=3	53	76	69	69	1	51	63	65	63	64	65	1	1	69	65	1.14179	0.600003	5	5	0	76	966	1023
164	>sp|Q9DB20|ATPO_MOUSE ATP synthase subunit O, mitochondrial OS=Mus musculus OX=10090 GN=Atp5po PE=1 SV=1	54	47	43	64	57	55	57	60	47	71	75	66	57	68	58	1.09434	0.379539	5	5	0	75	1191	213
165	>sp|Q9CPQ1|COX6C_MOUSE Cytochrome c oxidase subunit 6C OS=Mus musculus OX=10090 GN=Cox6c PE=1 SV=3	69	34	46	51	40	19	38	24	39	56	21	34	26	75	45	0.733333	0.184887	5	5	0	75	796	76
166	>tr|Q91VA7|Q91VA7_MOUSE Isocitrate dehydrogenase [NAD] subunit, mitochondrial OS=Mus musculus OX=10090 GN=Idh3b PE=1 SV=1	59	61	68	62	58	57	51	64	64	67	49	60	53	60	71	0.983766	0.775779	5	5	0	74	1214	384
167	>sp|P20029|BIP_MOUSE Endoplasmic reticulum chaperone BiP OS=Mus musculus OX=10090 GN=Hspa5 PE=1 SV=3	67	58	57	59	67	48	55	64	47	58	60	53	72	59	57	0.883117	0.10027	5	5	0	74	1208	655
168	>sp|P19096|FAS_MOUSE Fatty acid synthase OS=Mus musculus OX=10090 GN=Fasn PE=1 SV=2	38	74	60	68	71	45	46	64	61	69	53	60	67	56	74	0.916399	0.539237	5	5	0	74	1204	2504
169	>sp|Q64521|GPDM_MOUSE Glycerol-3-phosphate dehydrogenase, mitochondrial OS=Mus musculus OX=10090 GN=Gpd2 PE=1 SV=2	64	71	55	51	57	61	73	72	71	53	61	57	67	NaN	63	1.10738	0.259113	5	5	0	74	1190	727
170	>sp|O55131|SEPT7_MOUSE Septin-7 OS=Mus musculus OX=10090 GN=Septin7 PE=1 SV=1	63	NaN	NaN	NaN	71	NaN	NaN	70	NaN	73	73	73	61	NaN	64	1.06716	0.402649	2	2	0	74	737	436
171	>sp|D3Z7P3|GLSK_MOUSE Glutaminase kidney isoform, mitochondrial OS=Mus musculus OX=10090 GN=Gls PE=1 SV=1	46	67	73	70	63	27	51	65	59	58	57	40	52	63	60	0.815047	0.186034	5	5	0	73	1070	674
172	>sp|Q9JKC6|CEND_MOUSE Cell cycle exit and neuronal differentiation protein 1 OS=Mus musculus OX=10090 GN=Cend1 PE=1 SV=1	37	45	68	36	22	22	19	14	42	45	16	29	10	73	38	0.682692	0.217235	5	5	0	73	664	149
173	>sp|Q80TJ1|CAPS1_MOUSE Calcium-dependent secretion activator 1 OS=Mus musculus OX=10090 GN=Cadps PE=1 SV=3	3	65	1	55	NaN	1	2	42	55	3	3	40	60	52	73	0.664516	0.615594	4	5	0	73	615	1355
174	>sp|P61264|STX1B_MOUSE Syntaxin-1B OS=Mus musculus OX=10090 GN=Stx1b PE=1 SV=1	68	50	72	56	55	44	53	57	35	65	42	55	45	51	67	0.843854	0.196373	5	5	0	72	1091	288
175	>sp|F6SEU4|SYGP1_MOUSE Ras/Rap GTPase-activating protein SynGAP OS=Mus musculus OX=10090 GN=Syngap1 PE=1 SV=2	2	53	57	67	53	47	46	64	57	60	48	53	72	53	70	1.18103	0.501599	5	5	0	72	1013	1340
176	>sp|P15532|NDKA_MOUSE Nucleoside diphosphate kinase A OS=Mus musculus OX=10090 GN=Nme1 PE=1 SV=1	37	37	8	35	63	32	72	5	8	51	67	55	50	11	52	0.933333	0.880341	5	5	0	72	789	152
177	>sp|Q7TQF7|AMPH_MOUSE Amphiphysin OS=Mus musculus OX=10090 GN=Amph PE=1 SV=1	NaN	49	52	45	47	72	NaN	49	NaN	NaN	54	67	55	46	NaN	1.25389	0.172721	4	2	0	72	788	686
178	>sp|Q8QZT1|THIL_MOUSE Acetyl-CoA acetyltransferase, mitochondrial OS=Mus musculus OX=10090 GN=Acat1 PE=1 SV=1	70	70	64	60	67	51	51	66	57	71	65	43	64	56	53	0.89426	0.155064	5	5	0	71	1200	424
179	>sp|Q8BPN8|DMXL2_MOUSE DmX-like protein 2 OS=Mus musculus OX=10090 GN=Dmxl2 PE=1 SV=3	53	71	55	62	56	27	53	62	51	62	55	NaN	63	59	NaN	0.858586	0.276599	5	5	0	71	975	3032
180	>sp|P58281-2|OPA1_MOUSE Isoform 2 of Dynamin-like 120 kDa protein, mitochondrial OS=Mus musculus OX=10090 GN=Opa1	NaN	NaN	NaN	71	NaN	NaN	NaN	NaN	NaN	NaN	NaN	NaN	NaN	NaN	NaN	#DIV/0!	#DIV/0!	1	0	0	71	71	997
181	>sp|Q8K1M6|DNM1L_MOUSE Dynamin-1-like protein OS=Mus musculus OX=10090 GN=Dnm1l PE=1 SV=2	51	60	50	59	54	40	57	64	61	56	57	63	64	56	56	1.0146	0.866998	5	5	0	70	1164	742
182	>sp|P35802|GPM6A_MOUSE Neuronal membrane glycoprotein M6-a OS=Mus musculus OX=10090 GN=Gpm6a PE=1 SV=1	44	50	49	70	44	30	39	48	46	35	31	29	48	48	44	0.770428	0.0791188	5	5	0	70	843	278
183	>tr|B1AQW2|B1AQW2_MOUSE Microtubule-associated protein OS=Mus musculus OX=10090 GN=Mapt PE=1 SV=1	NaN	NaN	NaN	NaN	NaN	NaN	NaN	NaN	NaN	NaN	NaN	NaN	NaN	NaN	NaN	#DIV/0!	#DIV/0!	0	0	0	70	70	390
184	>sp|Q8BMF4|ODP2_MOUSE Dihydrolipoyllysine-residue acetyltransferase component of pyruvate dehydrogenase complex, mitochondrial OS=Mus musculus OX=10090 GN=Dlat PE=1 SV=2	46	60	62	49	61	51	47	60	52	65	51	61	67	55	54	0.989209	0.90128	5	5	0	69	1150	642
185	>tr|Q3U2G2|Q3U2G2_MOUSE Heat shock 70 kDa protein 4 OS=Mus musculus OX=10090 GN=Hspa4 PE=1 SV=1	42	69	67	56	56	51	59	62	46	61	51	63	51	54	63	0.962069	0.711882	5	5	0	69	1149	842
186	>sp|Q9D051|ODPB_MOUSE Pyruvate dehydrogenase E1 component subunit beta, mitochondrial OS=Mus musculus OX=10090 GN=Pdhb PE=1 SV=1	58	60	54	62	69	54	49	58	55	56	56	49	60	58	57	0.89769	0.0651141	5	5	0	69	1140	359
187	>sp|Q99P72|RTN4_MOUSE Reticulon-4 OS=Mus musculus OX=10090 GN=Rtn4 PE=1 SV=2	54	56	51	57	42	41	51	67	44	56	41	52	69	55	56	0.996154	0.971104	5	5	0	69	1062	1162
188	>sp|Q62420|SH3G2_MOUSE Endophilin-A1 OS=Mus musculus OX=10090 GN=Sh3gl2 PE=1 SV=2	52	NaN	44	53	46	46	60	42	50	49	44	69	53	51	51	1.01333	0.872703	4	5	0	69	936	352
189	>tr|D3YZ62|D3YZ62_MOUSE Unconventional myosin-Va OS=Mus musculus OX=10090 GN=Myo5a PE=1 SV=1	46	69	NaN	62	61	42	NaN	NaN	NaN	41	NaN	52	50	67	62	0.697479	0.0683862	4	2	0	69	776	1828
190	>sp|Q8CHC4|SYNJ1_MOUSE Synaptojanin-1 OS=Mus musculus OX=10090 GN=Synj1 PE=1 SV=3	NaN	69	NaN	NaN	65	40	50	54	62	60	42	1	NaN	NaN	68	0.79403	0.0929844	2	5	0	69	671	1574
191	>sp|P10637-2|TAU_MOUSE Isoform Tau-A of Microtubule-associated protein tau OS=Mus musculus OX=10090 GN=Mapt	8	6	5	2	3	1	48	1	2	1	1	69	4	1	5	2.20833	0.554896	5	5	0	69	173	430
192	>sp|Q9D0M3|CY1_MOUSE Cytochrome c1, heme protein, mitochondrial OS=Mus musculus OX=10090 GN=Cyc1 PE=1 SV=1	36	50	48	50	50	30	53	50	48	44	58	68	49	47	42	0.961538	0.720835	5	5	0	68	976	325
193	>sp|G5E829|AT2B1_MOUSE Plasma membrane calcium-transporting ATPase 1 OS=Mus musculus OX=10090 GN=Atp2b1 PE=1 SV=1	39	46	59	50	56	30	68	37	48	49	68	36	48	40	49	0.928	0.638458	5	5	0	68	926	1220
194	>sp|Q61548|AP180_MOUSE Clathrin coat assembly protein AP180 OS=Mus musculus OX=10090 GN=Snap91 PE=1 SV=1	38	33	NaN	NaN	NaN	42	54	44	52	NaN	45	52	46	NaN	45	1.35211	0.0555439	2	4	0	68	667	901
195	>tr|E9PZF0|E9PZF0_MOUSE Nucleoside diphosphate kinase OS=Mus musculus OX=10090 GN=Gm20390 PE=3 SV=1	7	14	44	12	5	11	6	68	52	12	14	11	7	35	13	1.81707	0.38185	5	5	0	68	434	267
196	>sp|P03995-2|GFAP_MOUSE Isoform 2 of Glial fibrillary acidic protein OS=Mus musculus OX=10090 GN=Gfap	NaN	NaN	NaN	NaN	NaN	NaN	68	NaN	NaN	NaN	NaN	NaN	NaN	NaN	NaN	#DIV/0!	#DIV/0!	0	1	0	68	68	428
197	>sp|P61205|ARF3_MOUSE ADP-ribosylation factor 3 OS=Mus musculus OX=10090 GN=Arf3 PE=2 SV=2	32	44	30	37	4	31	2	46	50	40	64	59	47	33	1	1.14966	0.697974	5	5	0	67	734	181
198	>sp|Q9Z2Q6|SEPT5_MOUSE Septin-5 OS=Mus musculus OX=10090 GN=Septin5 PE=1 SV=2	4	67	5	3	3	1	NaN	6	3	8	3	NaN	2	4	2	0.27439	0.43629	5	4	0	67	282	369
199	>sp|P40142|TKT_MOUSE Transketolase OS=Mus musculus OX=10090 GN=Tkt PE=1 SV=1	59	60	50	54	62	45	64	63	60	65	62	55	57	52	66	1.04211	0.591727	5	5	0	66	1162	623
200	>sp|P18760|COF1_MOUSE Cofilin-1 OS=Mus musculus OX=10090 GN=Cfl1 PE=1 SV=3	48	57	60	56	59	42	66	55	52	54	58	63	64	57	57	0.960714	0.628608	5	5	0	66	1144	166
201	>sp|P58281|OPA1_MOUSE Dynamin-like 120 kDa protein, mitochondrial OS=Mus musculus OX=10090 GN=Opa1 PE=1 SV=1	56	64	60	NaN	55	40	49	56	61	63	43	45	59	53	66	0.915745	0.364616	4	5	0	66	1028	960
202	>sp|P84091|AP2M1_MOUSE AP-2 complex subunit mu OS=Mus musculus OX=10090 GN=Ap2m1 PE=1 SV=1	45	63	47	46	57	33	47	38	53	40	50	39	55	66	53	0.817829	0.0974658	5	5	0	66	954	435
203	>sp|Q9Z0E0-2|NCDN_MOUSE Isoform 2 of Neurochondrin OS=Mus musculus OX=10090 GN=Ncdn	40	65	42	50	60	26	NaN	54	58	53	42	38	62	44	66	0.928988	0.680539	5	4	0	66	929	712
204	>sp|P06837|NEUM_MOUSE Neuromodulin OS=Mus musculus OX=10090 GN=Gap43 PE=1 SV=1	58	45	37	52	23	65	25	36	32	29	36	35	34	66	20	0.869767	0.567384	5	5	0	66	796	227
205	>tr|F8WHB1|F8WHB1_MOUSE Calcium-transporting ATPase OS=Mus musculus OX=10090 GN=Atp2b2 PE=1 SV=1	NaN	NaN	NaN	NaN	NaN	NaN	NaN	NaN	NaN	NaN	NaN	66	NaN	NaN	NaN	#DIV/0!	#DIV/0!	0	0	0	66	191	1243
206	>sp|Q8BPN8-2|DMXL2_MOUSE Isoform 2 of DmX-like protein 2 OS=Mus musculus OX=10090 GN=Dmxl2	NaN	NaN	NaN	NaN	NaN	NaN	NaN	NaN	NaN	NaN	NaN	51	NaN	NaN	66	#DIV/0!	#DIV/0!	0	0	0	66	117	3022
207	>sp|Q9Z1B3|PLCB1_MOUSE 1-phosphatidylinositol 4,5-bisphosphate phosphodiesterase beta-1 OS=Mus musculus OX=10090 GN=Plcb1 PE=1 SV=2	38	62	57	61	55	44	50	50	54	56	40	33	64	59	54	0.930403	0.451954	5	5	0	65	1045	1216
208	>sp|O55143|AT2A2_MOUSE Sarcoplasmic/endoplasmic reticulum calcium ATPase 2 OS=Mus musculus OX=10090 GN=Atp2a2 PE=1 SV=2	57	65	50	63	48	51	42	55	47	44	50	53	65	50	54	0.844523	0.0653526	5	5	0	65	1044	1044
209	>sp|P47857|PFKAM_MOUSE ATP-dependent 6-phosphofructokinase, muscle type OS=Mus musculus OX=10090 GN=Pfkm PE=1 SV=3	42	62	NaN	60	62	35	57	58	59	NaN	39	42	62	57	49	0.924779	0.593287	4	4	0	65	968	780
210	>sp|P99029|PRDX5_MOUSE Peroxiredoxin-5, mitochondrial OS=Mus musculus OX=10090 GN=Prdx5 PE=1 SV=2	56	38	51	48	56	36	51	42	47	39	38	55	48	42	42	0.863454	0.150983	5	5	0	65	947	210
211	>sp|P28652|KCC2B_MOUSE Calcium/calmodulin-dependent protein kinase type II subunit beta OS=Mus musculus OX=10090 GN=Camk2b PE=1 SV=2	47	54	43	57	41	28	NaN	49	49	50	NaN	37	NaN	NaN	NaN	0.909091	0.476832	5	4	0	65	650	542
212	>tr|A0A1B0GSX0|A0A1B0GSX0_MOUSE L-lactate dehydrogenase OS=Mus musculus OX=10090 GN=Ldha PE=1 SV=1	NaN	NaN	NaN	NaN	NaN	NaN	NaN	NaN	NaN	NaN	63	65	NaN	NaN	NaN	#DIV/0!	#DIV/0!	0	0	0	65	128	361
213	>sp|Q9WV92-2|E41L3_MOUSE Isoform 2 of Band 4.1-like protein 3 OS=Mus musculus OX=10090 GN=Epb41l3	NaN	NaN	NaN	65	NaN	NaN	NaN	NaN	NaN	NaN	NaN	NaN	NaN	NaN	NaN	#DIV/0!	#DIV/0!	1	0	0	65	65	939
214	>sp|P19783|COX41_MOUSE Cytochrome c oxidase subunit 4 isoform 1, mitochondrial OS=Mus musculus OX=10090 GN=Cox4i1 PE=1 SV=2	52	44	51	50	50	42	55	45	58	64	41	49	51	46	49	1.06883	0.45438	5	5	0	64	1021	169
215	>sp|P62897|CYC_MOUSE Cytochrome c, somatic OS=Mus musculus OX=10090 GN=Cycs PE=1 SV=2	54	59	38	64	43	24	29	35	50	47	39	36	48	45	41	0.717054	0.0703929	5	5	0	64	838	105
216	>sp|P10649|GSTM1_MOUSE Glutathione S-transferase Mu 1 OS=Mus musculus OX=10090 GN=Gstm1 PE=1 SV=2	NaN	55	32	45	54	35	55	57	45	50	54	63	44	60	55	1.04086	0.777701	4	5	0	63	979	218
217	>sp|Q9WUA3|PFKAP_MOUSE ATP-dependent 6-phosphofructokinase, platelet type OS=Mus musculus OX=10090 GN=Pfkp PE=1 SV=1	43	63	58	46	50	25	57	56	43	46	47	47	54	53	43	0.873077	0.365621	5	5	0	63	978	784
218	>sp|P09671|SODM_MOUSE Superoxide dismutase [Mn], mitochondrial OS=Mus musculus OX=10090 GN=Sod2 PE=1 SV=3	43	44	55	44	62	17	48	54	34	46	61	47	41	44	57	0.802419	0.232301	5	5	0	63	958	222
219	>sp|P56399|UBP5_MOUSE Ubiquitin carboxyl-terminal hydrolase 5 OS=Mus musculus OX=10090 GN=Usp5 PE=1 SV=1	NaN	55	52	51	45	40	51	58	NaN	53	49	48	62	49	49	0.995074	0.955908	4	4	0	63	945	858
220	>sp|P62761|VISL1_MOUSE Visinin-like protein 1 OS=Mus musculus OX=10090 GN=Vsnl1 PE=1 SV=2	50	46	50	41	46	24	34	40	63	44	50	36	39	42	56	0.879828	0.424876	5	5	0	63	864	191
221	>tr|D3Z4J3|D3Z4J3_MOUSE Unconventional myosin-Va OS=Mus musculus OX=10090 GN=Myo5a PE=1 SV=1	NaN	NaN	60	NaN	NaN	NaN	NaN	63	60	NaN	45	NaN	NaN	NaN	NaN	1.025	#DIV/0!	1	2	0	63	269	1855
222	>tr|D3Z656|D3Z656_MOUSE Synaptojanin-1 OS=Mus musculus OX=10090 GN=Synj1 PE=1 SV=1	NaN	NaN	57	NaN	NaN	NaN	NaN	NaN	NaN	NaN	NaN	44	63	NaN	NaN	#DIV/0!	#DIV/0!	1	0	0	63	164	1607
223	>sp|P28663|SNAB_MOUSE Beta-soluble NSF attachment protein OS=Mus musculus OX=10090 GN=Napb PE=1 SV=2	43	49	55	48	58	20	46	61	60	45	40	45	62	44	52	0.916996	0.608025	5	5	0	62	965	298
224	>sp|P14211|CALR_MOUSE Calreticulin OS=Mus musculus OX=10090 GN=Calr PE=1 SV=1	49	53	37	46	43	35	49	41	52	42	50	44	47	52	62	0.960526	0.66941	5	5	0	62	941	416
225	>sp|Q9D0K2|SCOT1_MOUSE Succinyl-CoA:3-ketoacid coenzyme A transferase 1, mitochondrial OS=Mus musculus OX=10090 GN=Oxct1 PE=1 SV=1	47	46	50	58	49	32	43	42	49	50	42	44	48	44	41	0.864	0.11553	5	5	0	62	939	520
226	>sp|Q9CQQ7|AT5F1_MOUSE ATP synthase F(0) complex subunit B1, mitochondrial OS=Mus musculus OX=10090 GN=Atp5pb PE=1 SV=1	45	53	41	44	52	29	45	46	59	34	44	55	46	62	45	0.906383	0.464134	5	5	0	62	936	256
227	>sp|Q9WV92|E41L3_MOUSE Band 4.1-like protein 3 OS=Mus musculus OX=10090 GN=Epb41l3 PE=1 SV=1	59	59	61	NaN	56	46	35	51	52	56	38	42	47	62	NaN	0.817021	0.0376672	4	5	0	62	906	929
228	>tr|A2AQR0|A2AQR0_MOUSE Glycerol-3-phosphate dehydrogenase OS=Mus musculus OX=10090 GN=Gpd2 PE=1 SV=1	NaN	NaN	NaN	NaN	NaN	NaN	NaN	NaN	NaN	NaN	NaN	NaN	NaN	62	NaN	#DIV/0!	#DIV/0!	0	0	0	62	62	745
229	>sp|P97300|NPTN_MOUSE Neuroplastin OS=Mus musculus OX=10090 GN=Nptn PE=1 SV=3	53	44	37	34	44	27	61	46	53	53	47	45	42	36	29	1.13208	0.423368	5	5	0	61	881	397
230	>sp|P19536|COX5B_MOUSE Cytochrome c oxidase subunit 5B, mitochondrial OS=Mus musculus OX=10090 GN=Cox5b PE=1 SV=1	39	37	44	NaN	38	40	40	53	29	52	38	53	44	37	40	1.08354	0.547322	4	5	0	61	829	128
231	>sp|Q8BWF0|SSDH_MOUSE Succinate-semialdehyde dehydrogenase, mitochondrial OS=Mus musculus OX=10090 GN=Aldh5a1 PE=1 SV=1	46	52	53	58	46	52	41	47	40	46	60	54	46	51	50	0.886275	0.103101	5	5	0	60	996	523
232	>sp|Q8K0T0|RTN1_MOUSE Reticulon-1 OS=Mus musculus OX=10090 GN=Rtn1 PE=1 SV=1	34	37	46	50	35	23	32	37	39	30	44	41	41	60	32	0.79703	0.0908196	5	5	0	60	769	780
233	>sp|Q62108-3|DLG4_MOUSE Isoform 3 of Disks large homolog 4 OS=Mus musculus OX=10090 GN=Dlg4	NaN	NaN	NaN	60	NaN	NaN	NaN	NaN	NaN	NaN	37	NaN	NaN	48	NaN	#DIV/0!	#DIV/0!	1	0	0	60	197	721
234	>tr|Q5SV64|Q5SV64_MOUSE Myosin-10 OS=Mus musculus OX=10090 GN=Myh10 PE=1 SV=1	NaN	NaN	NaN	NaN	NaN	NaN	NaN	NaN	NaN	NaN	NaN	NaN	NaN	NaN	NaN	#DIV/0!	#DIV/0!	0	0	0	60	60	2007
235	>sp|P08228|SODC_MOUSE Superoxide dismutase [Cu-Zn] OS=Mus musculus OX=10090 GN=Sod1 PE=1 SV=2	52	38	40	40	53	30	39	42	37	49	39	54	50	45	40	0.883408	0.280876	5	5	0	59	895	154
236	>sp|P35564|CALX_MOUSE Calnexin OS=Mus musculus OX=10090 GN=Canx PE=1 SV=1	42	40	30	59	38	38	34	36	44	43	39	29	33	31	48	0.933014	0.600917	5	5	0	59	778	591
237	>sp|Q62108|DLG4_MOUSE Disks large homolog 4 OS=Mus musculus OX=10090 GN=Dlg4 PE=1 SV=1	52	59	57	NaN	59	35	28	49	40	43	NaN	30	51	NaN	49	0.687225	0.00438098	4	5	0	59	701	724
238	>sp|Q9DCX2|ATP5H_MOUSE ATP synthase subunit d, mitochondrial OS=Mus musculus OX=10090 GN=Atp5pd PE=1 SV=3	43	47	43	40	51	44	51	44	43	53	52	45	51	53	51	1.04911	0.457427	5	5	0	58	949	161
239	>sp|Q91WD5|NDUS2_MOUSE NADH dehydrogenase [ubiquinone] iron-sulfur protein 2, mitochondrial OS=Mus musculus OX=10090 GN=Ndufs2 PE=1 SV=1	46	57	51	51	58	33	37	45	49	35	40	43	42	45	43	0.756654	0.00957238	5	5	0	58	901	463
240	>sp|Q8K2B3|SDHA_MOUSE Succinate dehydrogenase [ubiquinone] flavoprotein subunit, mitochondrial OS=Mus musculus OX=10090 GN=Sdha PE=1 SV=1	48	33	47	41	51	38	40	42	58	51	47	34	45	39	43	1.04091	0.725218	5	5	0	58	860	664
241	>sp|P02301|H3C_MOUSE Histone H3.3C OS=Mus musculus OX=10090 GN=H3-5 PE=3 SV=3	48	57	7	40	39	2	NaN	46	7	7	11	43	42	57	8	0.405759	0.127585	5	4	0	58	495	136
242	>tr|A0A668KM31|A0A668KM31_MOUSE Amphiphysin OS=Mus musculus OX=10090 GN=Amph PE=4 SV=1	NaN	NaN	NaN	NaN	NaN	NaN	45	NaN	43	50	NaN	NaN	NaN	NaN	58	#DIV/0!	#DIV/0!	0	3	0	58	248	820
243	>sp|C0HKE9|H2A1P_MOUSE Histone H2A type 1-P OS=Mus musculus OX=10090 GN=Hist1h2ap PE=1 SV=1	NaN	NaN	58	NaN	4	NaN	1	NaN	4	NaN	NaN	NaN	5	NaN	NaN	0.0806452	0.402445	2	2	0	58	82	130
244	>tr|Q3UH59|Q3UH59_MOUSE Myosin-10 OS=Mus musculus OX=10090 GN=Myh10 PE=1 SV=1	NaN	NaN	NaN	NaN	NaN	NaN	58	NaN	NaN	NaN	NaN	NaN	NaN	NaN	NaN	#DIV/0!	#DIV/0!	0	1	0	58	58	2013
245	>sp|Q62277|SYPH_MOUSE Synaptophysin OS=Mus musculus OX=10090 GN=Syp PE=1 SV=2	47	37	37	25	43	31	56	56	53	57	40	40	50	39	46	1.33862	0.0724217	5	5	0	57	893	314
246	>sp|Q9Z2I9|SUCB1_MOUSE Succinate--CoA ligase [ADP-forming] subunit beta, mitochondrial OS=Mus musculus OX=10090 GN=Sucla2 PE=1 SV=2	43	46	27	39	42	39	43	34	40	41	40	33	57	45	48	1	1	5	5	0	57	840	463
247	>sp|P26645|MARCS_MOUSE Myristoylated alanine-rich C-kinase substrate OS=Mus musculus OX=10090 GN=Marcks PE=1 SV=2	28	47	46	57	40	22	47	30	42	35	31	52	44	44	34	0.807339	0.231064	5	5	0	57	825	309
248	>sp|Q9D3D9|ATPD_MOUSE ATP synthase subunit delta, mitochondrial OS=Mus musculus OX=10090 GN=Atp5f1d PE=1 SV=1	41	38	26	50	31	33	32	38	53	28	26	30	50	47	31	0.989247	0.94854	5	5	0	57	799	168
249	>sp|Q9QYG0-2|NDRG2_MOUSE Isoform 2 of Protein NDRG2 OS=Mus musculus OX=10090 GN=Ndrg2	48	54	50	39	3	2	31	39	2	48	42	37	43	47	57	0.628866	0.310631	5	5	0	57	686	357
250	>sp|O08709|PRDX6_MOUSE Peroxiredoxin-6 OS=Mus musculus OX=10090 GN=Prdx6 PE=1 SV=3	NaN	NaN	NaN	NaN	NaN	46	NaN	NaN	NaN	NaN	NaN	57	NaN	NaN	NaN	#DIV/0!	#DIV/0!	0	1	0	57	103	224
251	>sp|Q9CZW5|TOM70_MOUSE Mitochondrial import receptor subunit TOM70 OS=Mus musculus OX=10090 GN=Tomm70 PE=1 SV=2	42	49	47	56	39	30	32	42	38	39	35	27	52	47	48	0.776824	0.0228506	5	5	0	56	812	611
252	>sp|Q9CR62|M2OM_MOUSE Mitochondrial 2-oxoglutarate/malate carrier protein OS=Mus musculus OX=10090 GN=Slc25a11 PE=1 SV=3	28	35	30	34	44	33	53	38	44	31	50	44	39	41	32	1.16374	0.282106	5	5	0	56	795	314
253	>sp|Q91V14-2|S12A5_MOUSE Isoform 2 of Solute carrier family 12 member 5 OS=Mus musculus OX=10090 GN=Slc12a5	35	44	39	39	47	22	NaN	NaN	41	43	37	41	54	35	44	0.866013	0.369601	5	3	0	56	743	1115
254	>sp|P43274|H14_MOUSE Histone H1.4 OS=Mus musculus OX=10090 GN=H1-4 PE=1 SV=2	46	37	42	33	56	16	25	25	9	48	39	41	37	40	41	0.574766	0.0452861	5	5	0	56	717	219
255	>tr|Q6DFY2|Q6DFY2_MOUSE Opioid-binding protein/cell adhesion molecule-like OS=Mus musculus OX=10090 GN=Opcml PE=1 SV=1	32	28	29	33	34	27	56	45	30	39	2	27	38	24	36	1.26282	0.165039	5	5	0	56	596	337
256	>sp|Q80TJ1-2|CAPS1_MOUSE Isoform 2 of Calcium-dependent secretion activator 1 OS=Mus musculus OX=10090 GN=Cadps	52	3	43	1	1	36	47	1	1	49	49	1	2	NaN	1	1.34	0.674857	5	5	0	56	397	1361
257	>sp|Q8CAQ8-2|MIC60_MOUSE Isoform 2 of MICOS complex subunit Mic60 OS=Mus musculus OX=10090 GN=Immt	NaN	NaN	2	4	56	52	NaN	NaN	51	2	3	NaN	2	NaN	NaN	1.69355	0.585252	3	3	0	56	274	746
258	>sp|Q80TJ1-4|CAPS1_MOUSE Isoform 4 of Calcium-dependent secretion activator 1 OS=Mus musculus OX=10090 GN=Cadps	NaN	NaN	NaN	NaN	56	NaN	NaN	NaN	NaN	NaN	NaN	NaN	NaN	NaN	NaN	#DIV/0!	#DIV/0!	1	0	0	56	56	1351
259	>tr|A0A338P769|A0A338P769_MOUSE Septin-5 OS=Mus musculus OX=10090 GN=Septin5 PE=1 SV=1	NaN	NaN	NaN	NaN	NaN	56	NaN	NaN	NaN	NaN	NaN	NaN	NaN	NaN	NaN	#DIV/0!	#DIV/0!	0	1	0	56	56	378
260	>sp|Q8K0U4|HS12A_MOUSE Heat shock 70 kDa protein 12A OS=Mus musculus OX=10090 GN=Hspa12a PE=1 SV=1	41	43	55	53	54	20	43	46	45	44	50	51	42	46	40	0.804878	0.133746	5	5	0	55	880	675
261	>tr|B2RXT3|B2RXT3_MOUSE Ogdhl protein OS=Mus musculus OX=10090 GN=Ogdhl PE=1 SV=1	42	54	40	49	47	29	43	44	49	45	42	40	41	55	49	0.905172	0.328247	5	5	0	55	868	1010
262	>sp|Q6ZQ38|CAND1_MOUSE Cullin-associated NEDD8-dissociated protein 1 OS=Mus musculus OX=10090 GN=Cand1 PE=1 SV=2	32	43	35	46	42	29	42	37	55	35	47	30	42	37	35	1	1	5	5	0	55	799	1230
263	>sp|Q91VR2|ATPG_MOUSE ATP synthase subunit gamma, mitochondrial OS=Mus musculus OX=10090 GN=Atp5f1c PE=1 SV=1	51	43	45	55	55	NaN	51	39	43	45	49	44	NaN	42	48	0.893574	0.182716	5	4	0	55	777	298
264	>tr|A2ALV3|A2ALV3_MOUSE Endophilin-A1 OS=Mus musculus OX=10090 GN=Sh3gl2 PE=1 SV=1	NaN	55	NaN	NaN	NaN	NaN	NaN	NaN	NaN	NaN	NaN	NaN	NaN	NaN	NaN	#DIV/0!	#DIV/0!	1	0	0	55	104	431
265	>sp|Q9QYB8|ADDB_MOUSE Beta-adducin OS=Mus musculus OX=10090 GN=Add2 PE=1 SV=4	38	54	51	49	44	34	44	48	43	52	49	40	53	54	44	0.936441	0.487351	5	5	0	54	927	725
266	>sp|Q9R111|GUAD_MOUSE Guanine deaminase OS=Mus musculus OX=10090 GN=Gda PE=1 SV=1	48	39	46	33	36	43	41	46	51	44	48	48	45	45	47	1.11386	0.20582	5	5	0	54	885	454
267	>sp|P51863|VA0D1_MOUSE V-type proton ATPase subunit d 1 OS=Mus musculus OX=10090 GN=Atp6v0d1 PE=1 SV=2	36	41	46	41	44	23	33	33	47	43	43	41	48	39	46	0.860577	0.238156	5	5	0	54	824	351
268	>sp|Q9D2G2|ODO2_MOUSE Dihydrolipoyllysine-residue succinyltransferase component of 2-oxoglutarate dehydrogenase complex, mitochondrial OS=Mus musculus OX=10090 GN=Dlst PE=1 SV=1	49	33	42	35	36	38	33	45	48	54	46	42	33	38	39	1.11795	0.357102	5	5	0	54	823	454
269	>sp|P63085|MK01_MOUSE Mitogen-activated protein kinase 1 OS=Mus musculus OX=10090 GN=Mapk1 PE=1 SV=3	33	37	44	40	54	37	37	33	44	38	34	36	41	40	51	0.908654	0.369925	5	5	0	54	811	358
270	>sp|Q05920|PYC_MOUSE Pyruvate carboxylase, mitochondrial OS=Mus musculus OX=10090 GN=Pc PE=1 SV=1	44	46	42	7	47	1	33	49	35	42	44	42	45	46	NaN	0.860215	0.655196	5	5	0	54	665	1178
271	>tr|A0A1L1SQ51|A0A1L1SQ51_MOUSE Talin-2 OS=Mus musculus OX=10090 GN=Tln2 PE=1 SV=1	31	54	40	42	43	14	NaN	42	43	39	40	34	43	NaN	37	0.821429	0.341137	5	4	0	54	657	2544
272	>sp|Q61301-2|CTNA2_MOUSE Isoform 2 of Catenin alpha-2 OS=Mus musculus OX=10090 GN=Ctnna2	34	35	38	39	NaN	35	NaN	NaN	43	19	30	34	54	35	32	0.885845	0.522876	4	3	0	54	541	905
273	>sp|P84228|H32_MOUSE Histone H3.2 OS=Mus musculus OX=10090 GN=H3c2 PE=1 SV=2	8	9	33	6	7	17	52	7	54	46	44	5	4	7	48	2.79365	0.0732039	5	5	0	54	503	136
274	>sp|Q9QYG0|NDRG2_MOUSE Protein NDRG2 OS=Mus musculus OX=10090 GN=Ndrg2 PE=1 SV=1	2	2	2	2	53	35	2	2	54	2	4	2	2	3	3	1.55738	0.65985	5	5	0	54	284	371
275	>tr|E9QPD7|E9QPD7_MOUSE Pyruvate carboxylase OS=Mus musculus OX=10090 GN=Pcx PE=1 SV=1	NaN	NaN	NaN	54	1	30	NaN	2	NaN	1	1	NaN	NaN	NaN	42	0.4	0.529138	2	3	0	54	224	1179
276	>tr|A0A0J9YVH8|A0A0J9YVH8_MOUSE Ras/Rap GTPase-activating protein SynGAP (Fragment) OS=Mus musculus OX=10090 GN=Syngap1 PE=1 SV=2	54	NaN	NaN	NaN	NaN	NaN	NaN	NaN	NaN	NaN	NaN	NaN	NaN	NaN	NaN	#DIV/0!	#DIV/0!	1	0	0	54	107	1282
277	>sp|P40124|CAP1_MOUSE Adenylyl cyclase-associated protein 1 OS=Mus musculus OX=10090 GN=Cap1 PE=1 SV=4	53	44	43	45	43	40	31	34	40	42	42	39	43	48	53	0.820175	0.0194771	5	5	0	53	853	474
278	>sp|Q60864|STIP1_MOUSE Stress-induced-phosphoprotein 1 OS=Mus musculus OX=10090 GN=Stip1 PE=1 SV=1	44	39	31	38	34	36	29	33	37	41	30	35	34	45	53	0.946237	0.523293	5	5	0	53	746	543
279	>sp|P00405|COX2_MOUSE Cytochrome c oxidase subunit 2 OS=Mus musculus OX=10090 GN=Mtco2 PE=1 SV=1	40	35	28	34	31	22	32	43	43	32	41	27	44	32	32	1.02381	0.861514	5	5	0	53	729	227
280	>sp|Q61699|HS105_MOUSE Heat shock protein 105 kDa OS=Mus musculus OX=10090 GN=Hsph1 PE=1 SV=2	31	NaN	34	37	40	34	22	28	30	40	26	29	40	34	53	0.867606	0.257158	4	5	0	53	613	858
281	>tr|G5E8R0|G5E8R0_MOUSE Tropomyosin alpha-1 chain OS=Mus musculus OX=10090 GN=Tpm1 PE=1 SV=1	15	NaN	31	14	26	14	10	9	1	NaN	12	7	1	17	28	0.395349	0.0401899	4	4	0	53	282	245
282	>sp|Q8CAQ8-5|MIC60_MOUSE Isoform 5 of MICOS complex subunit Mic60 OS=Mus musculus OX=10090 GN=Immt	NaN	NaN	3	NaN	NaN	2	NaN	10	NaN	53	NaN	NaN	12	7	NaN	7.22222	#DIV/0!	1	3	0	53	104	790
283	>sp|P68510|1433F_MOUSE 14-3-3 protein eta OS=Mus musculus OX=10090 GN=Ywhah PE=1 SV=2	49	45	42	46	45	27	47	51	43	50	40	36	28	39	48	0.960352	0.700805	5	5	0	52	842	246
284	>sp|Q11011|PSA_MOUSE Puromycin-sensitive aminopeptidase OS=Mus musculus OX=10090 GN=Npepps PE=1 SV=2	40	47	48	52	47	37	26	43	37	45	42	38	40	42	45	0.803419	0.0432073	5	5	0	52	841	920
285	>sp|Q61171|PRDX2_MOUSE Peroxiredoxin-2 OS=Mus musculus OX=10090 GN=Prdx2 PE=1 SV=3	33	38	37	40	45	32	34	39	39	37	43	43	31	41	47	0.937824	0.348169	5	5	0	52	800	198
286	>sp|P35486|ODPA_MOUSE Pyruvate dehydrogenase E1 component subunit alpha, somatic form, mitochondrial OS=Mus musculus OX=10090 GN=Pdha1 PE=1 SV=1	40	29	34	39	51	43	43	52	36	41	38	35	40	38	37	1.11399	0.355809	5	5	0	52	795	390
287	>sp|P63044|VAMP2_MOUSE Vesicle-associated membrane protein 2 OS=Mus musculus OX=10090 GN=Vamp2 PE=1 SV=2	48	33	NaN	50	47	40	NaN	47	45	52	48	52	43	NaN	47	1.03371	0.75593	4	4	0	52	779	116
288	>sp|P00920|CAH2_MOUSE Carbonic anhydrase 2 OS=Mus musculus OX=10090 GN=Ca2 PE=1 SV=4	45	41	30	43	43	32	35	35	49	44	52	32	30	31	36	0.965347	0.746206	5	5	0	52	765	260
289	>sp|Q3UHL1|CAMKV_MOUSE CaM kinase-like vesicle-associated protein OS=Mus musculus OX=10090 GN=Camkv PE=1 SV=2	31	37	52	36	36	24	27	34	30	44	29	21	34	35	35	0.828125	0.220818	5	5	0	52	670	512
290	>tr|F7ACR9|F7ACR9_MOUSE Microtubule-actin cross-linking factor 1 (Fragment) OS=Mus musculus OX=10090 GN=Macf1 PE=1 SV=1	NaN	52	NaN	NaN	NaN	NaN	NaN	NaN	NaN	NaN	NaN	NaN	NaN	NaN	NaN	#DIV/0!	#DIV/0!	1	0	0	52	52	5333
291	>sp|Q3UHJ0|AAK1_MOUSE AP2-associated protein kinase 1 OS=Mus musculus OX=10090 GN=Aak1 PE=1 SV=2	40	39	42	44	43	43	38	37	38	51	36	34	45	42	39	0.995192	0.944384	5	5	0	51	830	959
292	>sp|P54227|STMN1_MOUSE Stathmin OS=Mus musculus OX=10090 GN=Stmn1 PE=1 SV=2	51	44	31	50	30	31	23	25	26	30	30	28	15	48	26	0.65534	0.0178369	5	5	0	51	640	149
293	>sp|P08226|APOE_MOUSE Apolipoprotein E OS=Mus musculus OX=10090 GN=Apoe PE=1 SV=2	11	19	10	24	14	30	27	19	44	35	25	21	25	33	51	1.98718	0.0139501	5	5	0	51	540	311
294	>sp|Q61789|LAMA3_MOUSE Laminin subunit alpha-3 OS=Mus musculus OX=10090 GN=Lama3 PE=1 SV=4	NaN	43	51	NaN	37	39	29	24	37	NaN	NaN	23	NaN	48	NaN	0.73855	0.0860107	3	4	0	51	412	3330
295	>tr|Q91VB8|Q91VB8_MOUSE Alpha globin 1 OS=Mus musculus OX=10090 GN=Hba-a1 PE=1 SV=1	37	12	15	NaN	1	6	13	2	NaN	2	51	16	12	7	4	0.353846	0.236101	4	4	0	51	266	142
296	>tr|Q3U4W8|Q3U4W8_MOUSE Ubiquitin carboxyl-terminal hydrolase OS=Mus musculus OX=10090 GN=Usp5 PE=1 SV=1	51	NaN	NaN	NaN	NaN	NaN	NaN	NaN	46	NaN	NaN	NaN	NaN	NaN	NaN	0.901961	#DIV/0!	1	1	0	51	97	835
297	>sp|P47857-2|PFKAM_MOUSE Isoform 2 of ATP-dependent 6-phosphofructokinase, muscle type OS=Mus musculus OX=10090 GN=Pfkm	NaN	NaN	44	NaN	NaN	NaN	NaN	NaN	NaN	51	NaN	NaN	NaN	NaN	NaN	1.15909	#DIV/0!	1	1	0	51	95	850
298	>tr|A0A5F8MPR1|A0A5F8MPR1_MOUSE Band 4.1-like protein 3 OS=Mus musculus OX=10090 GN=Epb41l3 PE=1 SV=1	NaN	NaN	NaN	NaN	NaN	NaN	NaN	NaN	NaN	NaN	NaN	NaN	NaN	NaN	51	#DIV/0!	#DIV/0!	0	0	0	51	51	951
299	>sp|P31324|KAP3_MOUSE cAMP-dependent protein kinase type II-beta regulatory subunit OS=Mus musculus OX=10090 GN=Prkar2b PE=1 SV=3	50	50	50	41	40	35	36	34	45	50	41	45	42	48	43	0.865801	0.154416	5	5	0	50	877	416
300	>sp|P68404-2|KPCB_MOUSE Isoform Beta-II of Protein kinase C beta type OS=Mus musculus OX=10090 GN=Prkcb	48	42	43	48	45	34	44	45	41	44	36	40	44	45	41	0.920354	0.166684	5	5	0	50	855	673
301	>sp|P68033|ACTC_MOUSE Actin, alpha cardiac muscle 1 OS=Mus musculus OX=10090 GN=Actc1 PE=1 SV=1	44	45	33	41	49	24	37	42	40	50	43	38	50	37	33	0.910377	0.470085	5	5	0	50	793	377
302	>sp|Q8BVE3|VATH_MOUSE V-type proton ATPase subunit H OS=Mus musculus OX=10090 GN=Atp6v1h PE=1 SV=1	31	35	33	37	43	22	41	46	34	36	32	39	50	31	38	1	1	5	5	0	50	743	483
303	>sp|P61979|HNRPK_MOUSE Heterogeneous nuclear ribonucleoprotein K OS=Mus musculus OX=10090 GN=Hnrnpk PE=1 SV=1	NaN	NaN	48	46	48	39	31	28	37	44	32	36	46	46	41	0.756338	0.0237834	3	5	0	50	733	463
304	>sp|Q9QYC0|ADDA_MOUSE Alpha-adducin OS=Mus musculus OX=10090 GN=Add1 PE=1 SV=2	44	46	39	42	48	37	NaN	40	43	41	NaN	1	38	44	41	0.91895	0.132242	5	4	0	50	644	735
305	>sp|Q91V41|RAB14_MOUSE Ras-related protein Rab-14 OS=Mus musculus OX=10090 GN=Rab14 PE=1 SV=3	28	32	25	26	18	21	36	29	50	22	24	22	30	26	34	1.22481	0.346999	5	5	0	50	586	215
306	>tr|Q5SVJ0|Q5SVJ0_MOUSE Calcium/calmodulin-dependent protein kinase type II subunit beta OS=Mus musculus OX=10090 GN=Camk2b PE=1 SV=1	NaN	NaN	NaN	NaN	NaN	NaN	29	NaN	NaN	NaN	36	NaN	43	47	50	#DIV/0!	#DIV/0!	0	1	0	50	255	666
307	>sp|Q61548-2|AP180_MOUSE Isoform Short of Clathrin coat assembly protein AP180 OS=Mus musculus OX=10090 GN=Snap91	NaN	NaN	NaN	35	NaN	NaN	NaN	NaN	NaN	NaN	NaN	NaN	NaN	32	NaN	#DIV/0!	#DIV/0!	1	0	0	50	117	896
308	>sp|O88569-3|ROA2_MOUSE Isoform 3 of Heterogeneous nuclear ribonucleoproteins A2/B1 OS=Mus musculus OX=10090 GN=Hnrnpa2b1	NaN	NaN	NaN	NaN	NaN	NaN	NaN	NaN	NaN	NaN	50	NaN	NaN	NaN	NaN	#DIV/0!	#DIV/0!	0	0	0	50	50	301
309	>tr|A0A0G2JEG8|A0A0G2JEG8_MOUSE Amphiphysin OS=Mus musculus OX=10090 GN=Amph PE=1 SV=1	50	NaN	NaN	NaN	NaN	NaN	NaN	NaN	NaN	NaN	NaN	NaN	NaN	NaN	NaN	#DIV/0!	#DIV/0!	1	0	0	50	50	690
310	>sp|Q61598|GDIB_MOUSE Rab GDP dissociation inhibitor beta OS=Mus musculus OX=10090 GN=Gdi2 PE=1 SV=1	49	46	36	33	49	35	35	36	39	45	39	29	47	42	41	0.892019	0.269893	5	5	0	49	825	445
311	>sp|Q91YT0|NDUV1_MOUSE NADH dehydrogenase [ubiquinone] flavoprotein 1, mitochondrial OS=Mus musculus OX=10090 GN=Ndufv1 PE=1 SV=1	40	47	41	49	34	34	30	38	41	24	32	39	36	47	44	0.791469	0.0596268	5	5	0	49	758	464
312	>sp|P51881|ADT2_MOUSE ADP/ATP translocase 2 OS=Mus musculus OX=10090 GN=Slc25a5 PE=1 SV=3	38	49	39	41	43	34	42	21	48	37	43	41	34	35	37	0.866667	0.288464	5	5	0	49	754	298
313	>tr|A0A087WP80|A0A087WP80_MOUSE Limbic system-associated membrane protein OS=Mus musculus OX=10090 GN=Lsamp PE=1 SV=1	49	36	37	30	45	32	47	35	30	32	41	31	37	35	34	0.893401	0.384027	5	5	0	49	749	355
314	>sp|Q8VDQ8-2|SIR2_MOUSE Isoform 2 of NAD-dependent protein deacetylase sirtuin-2 OS=Mus musculus OX=10090 GN=Sirt2	38	42	41	37	32	20	22	39	30	49	33	37	43	36	42	0.842105	0.322633	5	5	0	49	681	352
315	>tr|B1AQX9|B1AQX9_MOUSE SRC kinase-signaling inhibitor 1 OS=Mus musculus OX=10090 GN=Srcin1 PE=1 SV=1	36	49	42	NaN	47	37	37	NaN	35	35	NaN	NaN	36	36	42	0.827586	0.0443515	4	4	0	49	594	1217
316	>sp|Q8C1B7|SEP11_MOUSE Septin-11 OS=Mus musculus OX=10090 GN=Septin11 PE=1 SV=4	33	36	49	14	15	13	7	10	8	44	16	8	17	13	14	0.557823	0.214392	5	5	0	49	375	431
317	>sp|Q9D880|TIM50_MOUSE Mitochondrial import inner membrane translocase subunit TIM50 OS=Mus musculus OX=10090 GN=Timm50 PE=1 SV=1	18	16	22	25	2	49	17	5	13	22	2	5	6	20	10	1.27711	0.602012	5	5	0	49	274	353
318	>tr|E9Q6Q4|E9Q6Q4_MOUSE RAP1, GTP-GDP dissociation stimulator 1 OS=Mus musculus OX=10090 GN=Rap1gds1 PE=1 SV=1	NaN	1	1	1	1	NaN	NaN	NaN	1	49	2	NaN	33	NaN	NaN	25	0.177808	4	2	0	49	92	558
319	>sp|O88342|WDR1_MOUSE WD repeat-containing protein 1 OS=Mus musculus OX=10090 GN=Wdr1 PE=1 SV=3	42	47	36	39	43	26	38	44	43	42	48	41	43	45	47	0.932367	0.481971	5	5	0	48	806	606
320	>sp|P35700|PRDX1_MOUSE Peroxiredoxin-1 OS=Mus musculus OX=10090 GN=Prdx1 PE=1 SV=1	38	39	31	40	48	38	31	43	33	48	47	43	40	42	29	0.984694	0.888548	5	5	0	48	782	199
321	>sp|P80314|TCPB_MOUSE T-complex protein 1 subunit beta OS=Mus musculus OX=10090 GN=Cct2 PE=1 SV=4	33	35	34	41	39	32	30	33	33	34	30	31	34	38	35	0.89011	0.0444092	5	5	0	48	713	535
322	>sp|P19157|GSTP1_MOUSE Glutathione S-transferase P 1 OS=Mus musculus OX=10090 GN=Gstp1 PE=1 SV=2	34	37	34	43	48	27	29	29	28	36	35	42	31	37	39	0.760204	0.0181262	5	5	0	48	692	210
323	>sp|Q9CYT6|CAP2_MOUSE Adenylyl cyclase-associated protein 2 OS=Mus musculus OX=10090 GN=Cap2 PE=1 SV=1	41	42	28	27	34	30	32	24	39	37	37	26	32	33	42	0.94186	0.639852	5	5	0	48	674	476
324	>sp|Q810U4-2|NRCAM_MOUSE Isoform 2 of Neuronal cell adhesion molecule OS=Mus musculus OX=10090 GN=Nrcam	38	4	34	34	2	34	43	NaN	36	44	38	37	34	37	35	1.75223	0.112528	5	4	0	48	654	1186
325	>sp|P62821|RAB1A_MOUSE Ras-related protein Rab-1A OS=Mus musculus OX=10090 GN=Rab1A PE=1 SV=3	2	26	33	33	29	1	2	2	32	38	42	44	39	38	30	0.609756	0.368012	5	5	0	48	579	205
326	>sp|Q8JZW4|CPNE5_MOUSE Copine-5 OS=Mus musculus OX=10090 GN=Cpne5 PE=1 SV=1	29	23	40	31	7	13	21	9	27	48	45	14	20	34	13	0.907692	0.791341	5	5	0	48	479	593
327	>sp|Q91V92|ACLY_MOUSE ATP-citrate synthase OS=Mus musculus OX=10090 GN=Acly PE=1 SV=1	34	46	36	41	34	34	37	37	43	41	44	41	NaN	47	43	1.00524	0.945364	5	5	0	47	756	1091
328	>sp|P27773|PDIA3_MOUSE Protein disulfide-isomerase A3 OS=Mus musculus OX=10090 GN=Pdia3 PE=1 SV=2	27	37	35	47	26	37	35	35	39	38	30	33	43	36	44	1.06977	0.555271	5	5	0	47	741	505
329	>sp|Q8BKX1|BAIP2_MOUSE Brain-specific angiogenesis inhibitor 1-associated protein 2 OS=Mus musculus OX=10090 GN=Baiap2 PE=1 SV=2	NaN	41	44	44	34	24	35	35	32	44	32	33	41	44	44	0.834356	0.150998	4	5	0	47	731	535
330	>sp|Q8R081|HNRPL_MOUSE Heterogeneous nuclear ribonucleoprotein L OS=Mus musculus OX=10090 GN=Hnrnpl PE=1 SV=2	40	46	40	46	46	NaN	NaN	33	25	44	38	33	37	NaN	37	0.779817	0.0755564	5	3	0	47	679	586
331	>sp|Q91V12-2|BACH_MOUSE Isoform A of Cytosolic acyl coenzyme A thioester hydrolase OS=Mus musculus OX=10090 GN=Acot7	31	47	29	29	42	26	34	33	32	34	34	32	36	25	28	0.893258	0.372745	5	5	0	47	660	338
332	>sp|Q8BG05|ROA3_MOUSE Heterogeneous nuclear ribonucleoprotein A3 OS=Mus musculus OX=10090 GN=Hnrnpa3 PE=1 SV=1	30	42	47	38	42	20	26	28	42	25	29	26	31	38	32	0.708543	0.0374455	5	5	0	47	642	379
333	>sp|Q99LC3|NDUAA_MOUSE NADH dehydrogenase [ubiquinone] 1 alpha subcomplex subunit 10, mitochondrial OS=Mus musculus OX=10090 GN=Ndufa10 PE=1 SV=1	33	31	32	37	35	17	30	29	32	21	28	28	28	26	38	0.767857	0.0352195	5	5	0	47	608	355
334	>sp|Q8VD37-6|SGIP1_MOUSE Isoform 6 of SH3-containing GRB2-like protein 3-interacting protein 1 OS=Mus musculus OX=10090 GN=Sgip1	20	29	26	NaN	24	21	18	NaN	22	25	20	47	23	26	25	0.868687	0.220392	4	4	0	47	439	854
335	>sp|P07724|ALBU_MOUSE Albumin OS=Mus musculus OX=10090 GN=Alb PE=1 SV=3	47	20	17	11	9	16	17	13	17	13	41	20	14	19	7	0.730769	0.440825	5	5	0	47	362	608
336	>sp|Q8CC35-2|SYNPO_MOUSE Isoform 2 of Synaptopodin OS=Mus musculus OX=10090 GN=Synpo	NaN	NaN	NaN	47	NaN	37	NaN	NaN	NaN	NaN	NaN	32	NaN	NaN	35	0.787234	#DIV/0!	1	1	0	47	256	901
337	>sp|P84078|ARF1_MOUSE ADP-ribosylation factor 1 OS=Mus musculus OX=10090 GN=Arf1 PE=1 SV=2	NaN	4	NaN	2	44	NaN	47	NaN	NaN	2	1	NaN	1	NaN	42	1.47	0.768827	3	2	0	47	180	181
338	>tr|B0QZN5|B0QZN5_MOUSE Vesicle-associated membrane protein 2 OS=Mus musculus OX=10090 GN=Vamp2 PE=1 SV=1	NaN	NaN	40	NaN	NaN	NaN	44	NaN	NaN	NaN	NaN	NaN	NaN	47	NaN	1.1	#DIV/0!	1	1	0	47	131	163
339	>sp|Q61548-3|AP180_MOUSE Isoform 3 of Clathrin coat assembly protein AP180 OS=Mus musculus OX=10090 GN=Snap91	NaN	NaN	46	NaN	47	NaN	NaN	NaN	NaN	37	NaN	NaN	NaN	NaN	NaN	0.795699	#DIV/0!	2	1	0	47	130	868
340	>tr|D3Z6I8|D3Z6I8_MOUSE Tropomyosin alpha-3 chain OS=Mus musculus OX=10090 GN=Tpm3 PE=1 SV=1	NaN	NaN	NaN	3	NaN	NaN	NaN	NaN	NaN	NaN	NaN	NaN	NaN	NaN	NaN	#DIV/0!	#DIV/0!	1	0	0	47	50	247
341	>sp|Q9QYX7|PCLO_MOUSE Protein piccolo OS=Mus musculus OX=10090 GN=Pclo PE=1 SV=4	39	42	42	46	44	37	33	38	36	43	28	32	33	42	31	0.877934	0.0319377	5	5	0	46	747	5068
342	>sp|Q8BMS1|ECHA_MOUSE Trifunctional enzyme subunit alpha, mitochondrial OS=Mus musculus OX=10090 GN=Hadha PE=1 SV=1	37	43	43	46	39	32	34	39	30	40	28	40	40	39	37	0.841346	0.0307903	5	5	0	46	740	763
343	>sp|Q9D6M3|GHC1_MOUSE Mitochondrial glutamate carrier 1 OS=Mus musculus OX=10090 GN=Slc25a22 PE=1 SV=1	31	44	38	46	36	23	42	46	36	38	41	30	35	32	35	0.948718	0.685046	5	5	0	46	716	323
344	>sp|P47738|ALDH2_MOUSE Aldehyde dehydrogenase, mitochondrial OS=Mus musculus OX=10090 GN=Aldh2 PE=1 SV=1	38	26	28	35	29	36	42	39	31	32	46	38	39	41	25	1.15385	0.156851	5	5	0	46	703	519
345	>sp|Q8BLQ9|CADM2_MOUSE Cell adhesion molecule 2 OS=Mus musculus OX=10090 GN=Cadm2 PE=1 SV=2	31	38	31	26	34	29	46	35	38	32	46	34	32	25	35	1.125	0.28887	5	5	0	46	677	435
346	>sp|Q9ES97|RTN3_MOUSE Reticulon-3 OS=Mus musculus OX=10090 GN=Rtn3 PE=1 SV=2	33	41	NaN	39	37	23	33	40	39	36	39	39	46	38	44	0.912	0.411134	4	5	0	46	675	964
347	>sp|Q7TQD2|TPPP_MOUSE Tubulin polymerization-promoting protein OS=Mus musculus OX=10090 GN=Tppp PE=1 SV=1	31	40	27	44	32	24	28	30	22	39	31	37	29	32	33	0.821839	0.187425	5	5	0	46	671	218
348	>sp|P08113|ENPL_MOUSE Endoplasmin OS=Mus musculus OX=10090 GN=Hsp90b1 PE=1 SV=2	32	32	35	43	22	31	31	25	27	38	30	36	31	36	46	0.926829	0.568636	5	5	0	46	670	802
349	>tr|A0A1L1SV25|A0A1L1SV25_MOUSE Alpha-actinin-4 OS=Mus musculus OX=10090 GN=Actn4 PE=1 SV=1	29	43	31	33	42	46	27	26	33	40	18	32	29	30	40	0.966292	0.808806	5	5	0	46	658	932
350	>sp|P97797-2|SHPS1_MOUSE Isoform 2 of Tyrosine-protein phosphatase non-receptor type substrate 1 OS=Mus musculus OX=10090 GN=Sirpa	31	32	14	35	32	38	23	34	16	20	25	29	31	40	28	0.909722	0.65693	5	5	0	46	619	509
351	>sp|Q8BMF3|MAON_MOUSE NADP-dependent malic enzyme, mitochondrial OS=Mus musculus OX=10090 GN=Me3 PE=1 SV=2	16	39	32	33	34	7	33	28	15	35	39	20	40	16	37	0.766234	0.311906	5	5	0	46	607	604
352	>sp|P11983|TCPA_MOUSE T-complex protein 1 subunit alpha OS=Mus musculus OX=10090 GN=Tcp1 PE=1 SV=3	28	46	29	39	33	28	25	31	29	29	22	24	21	29	27	0.811429	0.0961711	5	5	0	46	596	556
353	>sp|P62962|PROF1_MOUSE Profilin-1 OS=Mus musculus OX=10090 GN=Pfn1 PE=1 SV=2	28	26	24	21	23	24	32	34	32	21	31	46	32	20	23	1.17213	0.176343	5	5	0	46	572	140
354	>sp|Q8CC35-3|SYNPO_MOUSE Isoform 3 of Synaptopodin OS=Mus musculus OX=10090 GN=Synpo	46	34	44	NaN	45	NaN	29	41	32	42	24	NaN	33	42	NaN	0.852071	0.19357	4	4	0	46	450	690
355	>sp|Q9Z0P4-2|PALM_MOUSE Isoform 2 of Paralemmin-1 OS=Mus musculus OX=10090 GN=Palm	33	NaN	26	29	21	46	26	3	NaN	26	33	34	NaN	1	NaN	0.926606	0.834128	4	4	0	46	428	339
356	>sp|O08539-2|BIN1_MOUSE Isoform 2 of Myc box-dependent-interacting protein 1 OS=Mus musculus OX=10090 GN=Bin1	NaN	NaN	NaN	NaN	NaN	NaN	NaN	NaN	NaN	NaN	31	NaN	32	NaN	NaN	#DIV/0!	#DIV/0!	0	0	0	46	109	434
357	>tr|A2AE89|A2AE89_MOUSE Glutathione S-transferase Mu 1 OS=Mus musculus OX=10090 GN=Gstm1 PE=1 SV=2	46	NaN	NaN	NaN	NaN	NaN	NaN	NaN	NaN	NaN	NaN	NaN	NaN	NaN	NaN	#DIV/0!	#DIV/0!	1	0	0	46	46	244
358	>tr|G5E884|G5E884_MOUSE Non-specific serine/threonine protein kinase OS=Mus musculus OX=10090 GN=Pak1 PE=1 SV=1	29	38	33	39	36	30	32	36	38	45	31	28	40	32	30	1.03429	0.716088	5	5	0	45	670	544
359	>sp|P28660|NCKP1_MOUSE Nck-associated protein 1 OS=Mus musculus OX=10090 GN=Nckap1 PE=1 SV=2	27	41	33	32	39	30	27	37	45	36	25	24	34	37	39	1.01744	0.884692	5	5	0	45	660	1128
360	>tr|E9Q912|E9Q912_MOUSE RAP1, GTP-GDP dissociation stimulator 1 OS=Mus musculus OX=10090 GN=Rap1gds1 PE=1 SV=1	36	41	30	41	40	44	1	39	39	1	NaN	33	1	45	44	0.659574	0.23577	5	5	0	45	614	607
361	>sp|Q9DCT2|NDUS3_MOUSE NADH dehydrogenase [ubiquinone] iron-sulfur protein 3, mitochondrial OS=Mus musculus OX=10090 GN=Ndufs3 PE=1 SV=2	45	31	26	24	31	26	31	27	34	31	24	31	28	25	31	0.949045	0.696024	5	5	0	45	608	263
362	>tr|F8WIT2|F8WIT2_MOUSE Annexin OS=Mus musculus OX=10090 GN=Anxa6 PE=1 SV=1	23	34	NaN	NaN	1	NaN	NaN	29	40	NaN	23	33	37	NaN	NaN	1.78448	0.333178	3	2	0	45	301	667
363	>tr|E9QA63|E9QA63_MOUSE Microtubule-actin cross-linking factor 1 OS=Mus musculus OX=10090 GN=Macf1 PE=1 SV=2	NaN	NaN	NaN	NaN	NaN	NaN	NaN	35	NaN	NaN	NaN	30	45	NaN	NaN	#DIV/0!	#DIV/0!	0	1	0	45	141	7351
364	>tr|Q8C2Q8|Q8C2Q8_MOUSE ATP synthase subunit gamma OS=Mus musculus OX=10090 GN=Atp5c1 PE=1 SV=1	NaN	NaN	NaN	NaN	NaN	32	NaN	NaN	NaN	NaN	NaN	NaN	34	NaN	NaN	#DIV/0!	#DIV/0!	0	1	0	45	111	274
365	>sp|Q80Z24|NEGR1_MOUSE Neuronal growth regulator 1 OS=Mus musculus OX=10090 GN=Negr1 PE=1 SV=1	38	29	37	35	37	32	34	41	29	33	39	33	39	40	35	0.960227	0.600103	5	5	0	44	726	348
366	>sp|P61161|ARP2_MOUSE Actin-related protein 2 OS=Mus musculus OX=10090 GN=Actr2 PE=1 SV=1	32	37	33	32	44	28	38	32	37	42	29	32	32	26	35	0.994382	0.953853	5	5	0	44	699	394
367	>sp|P12787|COX5A_MOUSE Cytochrome c oxidase subunit 5A, mitochondrial OS=Mus musculus OX=10090 GN=Cox5a PE=1 SV=2	37	29	36	44	37	32	25	27	35	36	29	34	24	37	36	0.846995	0.120074	5	5	0	44	686	146
368	>sp|Q8BFR5|EFTU_MOUSE Elongation factor Tu, mitochondrial OS=Mus musculus OX=10090 GN=Tufm PE=1 SV=1	37	43	39	44	40	21	37	30	33	35	27	22	32	34	39	0.768473	0.0158267	5	5	0	44	680	452
369	>sp|O35526|STX1A_MOUSE Syntaxin-1A OS=Mus musculus OX=10090 GN=Stx1a PE=1 SV=3	26	32	22	34	29	25	38	44	35	42	42	30	31	33	28	1.28671	0.072286	5	5	0	44	655	288
370	>sp|P67778|PHB_MOUSE Prohibitin OS=Mus musculus OX=10090 GN=Phb PE=1 SV=1	37	32	26	30	38	30	41	39	33	25	44	30	29	24	29	1.03067	0.792537	5	5	0	44	653	272
371	>sp|Q9CR68|UCRI_MOUSE Cytochrome b-c1 complex subunit Rieske, mitochondrial OS=Mus musculus OX=10090 GN=Uqcrfs1 PE=1 SV=1	30	26	29	21	22	33	27	36	26	34	37	26	43	33	24	1.21875	0.0703458	5	5	0	44	627	274
372	>sp|Q91XM9|DLG2_MOUSE Disks large homolog 2 OS=Mus musculus OX=10090 GN=Dlg2 PE=1 SV=2	19	41	NaN	NaN	35	26	33	30	28	26	25	NaN	35	32	30	0.903158	0.570442	3	5	0	44	530	852
373	>sp|P21107-2|TPM3_MOUSE Isoform 2 of Tropomyosin alpha-3 chain OS=Mus musculus OX=10090 GN=Tpm3	37	2	2	34	10	44	36	7	6	12	29	6	34	36	7	1.23529	0.726838	5	5	0	44	374	248
374	>tr|E9PVY8|E9PVY8_MOUSE Microtubule-actin cross-linking factor 1 OS=Mus musculus OX=10090 GN=Macf1 PE=1 SV=2	NaN	NaN	34	44	34	NaN	NaN	NaN	38	NaN	NaN	NaN	NaN	NaN	40	1.01786	#DIV/0!	3	1	0	44	293	7355
375	>sp|A2ASS6|TITIN_MOUSE Titin OS=Mus musculus OX=10090 GN=Ttn PE=1 SV=1	26	NaN	NaN	34	NaN	34	44	NaN	NaN	32	19	NaN	NaN	NaN	NaN	1.22222	0.322619	2	3	0	44	279	35213
376	>tr|G5E8G3|G5E8G3_MOUSE Opioid-binding protein/cell adhesion molecule-like OS=Mus musculus OX=10090 GN=Opcml PE=1 SV=1	NaN	1	2	1	1	2	3	2	2	1	42	2	2	NaN	3	1.6	0.117646	4	5	0	44	147	345
377	>sp|Q9D855|QCR7_MOUSE Cytochrome b-c1 complex subunit 7 OS=Mus musculus OX=10090 GN=Uqcrb PE=1 SV=3	33	35	37	32	41	36	37	37	36	33	43	28	26	37	39	1.00562	0.91236	5	5	0	43	674	111
378	>sp|Q99JY9|ARP3_MOUSE Actin-related protein 3 OS=Mus musculus OX=10090 GN=Actr3 PE=1 SV=3	35	39	30	34	38	24	23	36	33	38	24	31	36	41	43	0.875	0.241148	5	5	0	43	668	418
379	>sp|P80318|TCPG_MOUSE T-complex protein 1 subunit gamma OS=Mus musculus OX=10090 GN=Cct3 PE=1 SV=1	33	43	38	30	31	24	20	34	27	42	33	28	34	37	40	0.84	0.257106	5	5	0	43	656	545
380	>tr|S4R2K9|S4R2K9_MOUSE Ankyrin-3 (Fragment) OS=Mus musculus OX=10090 GN=Ank3 PE=1 SV=1	29	36	43	37	37	16	19	32	33	37	21	28	29	32	23	0.752747	0.0926334	5	5	0	43	597	2622
381	>sp|O08539|BIN1_MOUSE Myc box-dependent-interacting protein 1 OS=Mus musculus OX=10090 GN=Bin1 PE=1 SV=1	3	33	34	42	35	34	27	32	29	42	NaN	NaN	NaN	2	39	1.11565	0.652332	5	5	0	43	456	588
382	>sp|Q9Z2H5|E41L1_MOUSE Band 4.1-like protein 1 OS=Mus musculus OX=10090 GN=Epb41l1 PE=1 SV=2	NaN	1	43	31	NaN	1	NaN	NaN	25	NaN	35	NaN	NaN	NaN	NaN	0.52	0.561581	3	2	0	43	230	879
383	>tr|Q5SW88|Q5SW88_MOUSE RAB1A, member RAS oncogene family OS=Mus musculus OX=10090 GN=Rab1a PE=1 SV=1	35	2	NaN	2	NaN	42	43	35	2	4	4	3	NaN	3	4	1.93846	0.43635	3	5	0	43	180	202
384	>tr|G5E924|G5E924_MOUSE Heterogeneous nuclear ribonucleoprotein L (Fragment) OS=Mus musculus OX=10090 GN=Hnrnpl PE=1 SV=1	NaN	NaN	NaN	NaN	NaN	20	30	NaN	NaN	NaN	NaN	NaN	NaN	43	NaN	#DIV/0!	#DIV/0!	0	2	0	43	93	615
385	>sp|Q91V14|S12A5_MOUSE Solute carrier family 12 member 5 OS=Mus musculus OX=10090 GN=Slc12a5 PE=1 SV=2	NaN	NaN	NaN	NaN	NaN	NaN	43	43	NaN	NaN	NaN	NaN	NaN	NaN	NaN	#DIV/0!	#DIV/0!	0	2	0	43	86	1138
386	>sp|P48722|HS74L_MOUSE Heat shock 70 kDa protein 4L OS=Mus musculus OX=10090 GN=Hspa4l PE=1 SV=2	33	38	35	31	41	25	33	36	26	32	25	28	33	41	33	0.853933	0.0963465	5	5	0	42	650	838
387	>sp|Q60931|VDAC3_MOUSE Voltage-dependent anion-selective channel protein 3 OS=Mus musculus OX=10090 GN=Vdac3 PE=1 SV=1	27	35	31	21	42	NaN	33	34	40	31	34	42	40	27	28	1.10577	0.475322	5	4	0	42	640	283
388	>sp|Q5SQX6|CYFP2_MOUSE Cytoplasmic FMR1-interacting protein 2 OS=Mus musculus OX=10090 GN=Cyfip2 PE=1 SV=2	25	36	23	24	25	27	20	39	36	36	34	31	34	35	42	1.18797	0.27393	5	5	0	42	630	1253
389	>sp|Q64433|CH10_MOUSE 10 kDa heat shock protein, mitochondrial OS=Mus musculus OX=10090 GN=Hspe1 PE=1 SV=2	23	29	34	24	34	30	35	29	25	39	33	30	30	25	28	1.09722	0.432919	5	5	0	42	613	102
390	>sp|Q9QXY6|EHD3_MOUSE EH domain-containing protein 3 OS=Mus musculus OX=10090 GN=Ehd3 PE=1 SV=2	29	26	21	39	31	29	31	28	19	30	27	20	35	33	26	0.938356	0.637357	5	5	0	42	580	535
391	>sp|Q8VDD5|MYH9_MOUSE Myosin-9 OS=Mus musculus OX=10090 GN=Myh9 PE=1 SV=4	20	23	40	32	26	24	18	30	23	23	19	24	37	30	39	0.836879	0.287514	5	5	0	42	561	1960
392	>sp|Q8BVI4|DHPR_MOUSE Dihydropteridine reductase OS=Mus musculus OX=10090 GN=Qdpr PE=1 SV=2	30	29	29	29	24	20	33	32	23	42	25	28	18	24	28	1.06383	0.66885	5	5	0	42	549	241
393	>sp|Q9JIS5|SV2A_MOUSE Synaptic vesicle glycoprotein 2A OS=Mus musculus OX=10090 GN=Sv2a PE=1 SV=1	27	28	23	42	22	32	18	25	38	22	21	31	24	24	30	0.950704	0.789265	5	5	0	42	530	742
394	>sp|P14824|ANXA6_MOUSE Annexin A6 OS=Mus musculus OX=10090 GN=Anxa6 PE=1 SV=3	NaN	NaN	29	28	27	32	24	NaN	NaN	31	NaN	1	NaN	33	42	1.03571	0.71826	3	3	0	42	335	673
395	>tr|A0A1W2P7Y9|A0A1W2P7Y9_MOUSE Neuronal cell adhesion molecule OS=Mus musculus OX=10090 GN=Nrcam PE=1 SV=1	4	42	4	4	41	3	1	1	NaN	4	NaN	NaN	NaN	2	3	0.118421	0.152586	5	4	0	42	117	1134
396	>sp|Q71LX4|TLN2_MOUSE Talin-2 OS=Mus musculus OX=10090 GN=Tln2 PE=1 SV=3	NaN	NaN	NaN	NaN	NaN	NaN	22	NaN	NaN	NaN	NaN	NaN	NaN	42	NaN	#DIV/0!	#DIV/0!	0	1	0	42	93	2375
397	>sp|P10637|TAU_MOUSE Microtubule-associated protein tau OS=Mus musculus OX=10090 GN=Mapt PE=1 SV=3	2	3	4	2	2	NaN	NaN	5	1	5	42	NaN	2	NaN	NaN	1.41026	0.373771	5	3	0	42	78	733
398	>sp|Q99104|MYO5A_MOUSE Unconventional myosin-Va OS=Mus musculus OX=10090 GN=Myo5a PE=1 SV=2	NaN	NaN	NaN	NaN	NaN	NaN	42	NaN	NaN	NaN	NaN	NaN	NaN	NaN	NaN	#DIV/0!	#DIV/0!	0	1	0	42	42	1853
399	>sp|P63318|KPCG_MOUSE Protein kinase C gamma type OS=Mus musculus OX=10090 GN=Prkcg PE=1 SV=1	33	38	36	37	37	31	32	32	35	36	30	32	32	36	36	0.917127	0.0493374	5	5	0	41	686	697
400	>sp|P34884|MIF_MOUSE Macrophage migration inhibitory factor OS=Mus musculus OX=10090 GN=Mif PE=1 SV=2	26	30	20	30	26	21	23	27	25	25	41	17	28	24	22	0.916667	0.324915	5	5	0	41	511	115
401	>tr|E9PV14|E9PV14_MOUSE Band 4.1-like protein 1 OS=Mus musculus OX=10090 GN=Epb41l1 PE=1 SV=2	36	41	2	NaN	32	21	26	40	1	36	NaN	24	31	41	34	0.893694	0.7953	4	5	0	41	428	1556
402	>sp|Q8R366|IGSF8_MOUSE Immunoglobulin superfamily member 8 OS=Mus musculus OX=10090 GN=Igsf8 PE=1 SV=2	NaN	NaN	28	25	35	3	NaN	37	26	4	2	41	NaN	27	28	0.596591	0.299796	3	4	0	41	331	611
403	>sp|P61979-2|HNRPK_MOUSE Isoform 2 of Heterogeneous nuclear ribonucleoprotein K OS=Mus musculus OX=10090 GN=Hnrnpk	41	39	NaN	NaN	NaN	NaN	NaN	NaN	NaN	NaN	NaN	NaN	NaN	NaN	NaN	#DIV/0!	#DIV/0!	2	0	0	41	80	464
404	>tr|Q3TU36|Q3TU36_MOUSE RAP1, GTP-GDP dissociation stimulator 1 OS=Mus musculus OX=10090 GN=Rap1gds1 PE=1 SV=1	1	1	1	NaN	1	NaN	1	NaN	NaN	1	41	1	1	2	1	1	#DIV/0!	4	2	0	41	56	606
405	>sp|Q8VEK3|HNRPU_MOUSE Heterogeneous nuclear ribonucleoprotein U OS=Mus musculus OX=10090 GN=Hnrnpu PE=1 SV=1	33	37	39	34	27	27	28	30	37	37	24	29	33	34	25	0.935294	0.482871	5	5	0	40	629	800
406	>sp|Q99LX0|PARK7_MOUSE Parkinson disease protein 7 homolog OS=Mus musculus OX=10090 GN=Park7 PE=1 SV=1	34	35	28	30	31	27	25	31	38	39	35	29	28	25	40	1.01266	0.900773	5	5	0	40	628	189
407	>sp|P62880|GBB2_MOUSE Guanine nucleotide-binding protein G(I)/G(S)/G(T) subunit beta-2 OS=Mus musculus OX=10090 GN=Gnb2 PE=1 SV=3	28	37	25	40	30	19	39	31	40	29	32	28	34	35	30	0.9875	0.93481	5	5	0	40	614	340
408	>sp|Q9R1T4|SEPT6_MOUSE Septin-6 OS=Mus musculus OX=10090 GN=Septin6 PE=1 SV=4	13	15	20	33	33	33	24	33	38	16	35	25	35	35	39	1.26316	0.333453	5	5	0	40	593	434
409	>sp|Q4ACU6|SHAN3_MOUSE SH3 and multiple ankyrin repeat domains protein 3 OS=Mus musculus OX=10090 GN=Shank3 PE=1 SV=3	32	23	34	28	40	16	21	25	35	31	23	24	35	26	24	0.815287	0.227821	5	5	0	40	576	1730
410	>sp|P20152|VIME_MOUSE Vimentin OS=Mus musculus OX=10090 GN=Vim PE=1 SV=3	24	21	18	21	20	31	14	21	22	22	34	25	27	40	33	1.05769	0.686913	5	5	0	40	530	466
411	>sp|P23819-4|GRIA2_MOUSE Isoform 4 of Glutamate receptor 2 OS=Mus musculus OX=10090 GN=Gria2	26	NaN	32	31	37	30	30	29	38	NaN	NaN	NaN	29	31	32	1.00794	0.937924	4	4	0	40	478	921
412	>tr|E9Q7Q3|E9Q7Q3_MOUSE Tropomyosin alpha-3 chain OS=Mus musculus OX=10090 GN=Tpm3 PE=1 SV=1	5	40	7	NaN	5	8	6	37	3	5	NaN	37	4	3	4	0.82807	0.82108	4	5	0	40	205	248
413	>sp|Q61301-3|CTNA2_MOUSE Isoform 3 of Catenin alpha-2 OS=Mus musculus OX=10090 GN=Ctnna2	NaN	NaN	NaN	NaN	40	NaN	34	33	NaN	NaN	NaN	NaN	NaN	NaN	NaN	0.8375	#DIV/0!	1	2	0	40	163	918
414	>sp|Q8R1M2|H2AJ_MOUSE Histone H2A.J OS=Mus musculus OX=10090 GN=H2aj PE=1 SV=1	11	7	NaN	7	NaN	40	NaN	NaN	NaN	7	NaN	NaN	NaN	5	1	2.82	0.309189	3	2	0	40	93	129
415	>sp|Q9ES97-2|RTN3_MOUSE Isoform 2 of Reticulon-3 OS=Mus musculus OX=10090 GN=Rtn3	NaN	NaN	40	NaN	NaN	NaN	NaN	NaN	NaN	NaN	NaN	NaN	NaN	NaN	NaN	#DIV/0!	#DIV/0!	1	0	0	40	79	945
416	>tr|A0A0G2JGC8|A0A0G2JGC8_MOUSE RAP1, GTP-GDP dissociation stimulator 1 OS=Mus musculus OX=10090 GN=Rap1gds1 PE=1 SV=1	NaN	NaN	NaN	NaN	NaN	NaN	40	NaN	NaN	NaN	NaN	NaN	NaN	NaN	NaN	#DIV/0!	#DIV/0!	0	1	0	40	40	544
417	>sp|O54983|CRYM_MOUSE Ketimine reductase mu-crystallin OS=Mus musculus OX=10090 GN=Crym PE=1 SV=1	30	29	26	30	39	37	26	32	32	31	33	39	39	34	39	1.02597	0.781815	5	5	0	39	668	313
418	>sp|Q91V61|SFXN3_MOUSE Sideroflexin-3 OS=Mus musculus OX=10090 GN=Sfxn3 PE=1 SV=1	34	26	31	26	33	31	38	28	26	35	32	38	39	39	34	1.05333	0.581506	5	5	0	39	649	321
419	>sp|Q61553|FSCN1_MOUSE Fascin OS=Mus musculus OX=10090 GN=Fscn1 PE=1 SV=4	27	39	34	32	39	19	31	36	31	33	34	31	28	29	33	0.877193	0.286713	5	5	0	39	638	493
420	>sp|O35129|PHB2_MOUSE Prohibitin-2 OS=Mus musculus OX=10090 GN=Phb2 PE=1 SV=1	31	30	27	31	37	31	35	29	37	23	35	25	35	31	25	0.99359	0.947423	5	5	0	39	617	299
421	>sp|P47754|CAZA2_MOUSE F-actin-capping protein subunit alpha-2 OS=Mus musculus OX=10090 GN=Capza2 PE=1 SV=3	29	32	26	29	39	20	33	33	28	33	39	27	30	25	30	0.948387	0.64768	5	5	0	39	614	286
422	>sp|Q8R0Y6|AL1L1_MOUSE Cytosolic 10-formyltetrahydrofolate dehydrogenase OS=Mus musculus OX=10090 GN=Aldh1l1 PE=1 SV=1	24	35	28	26	33	16	27	28	30	34	33	25	34	38	39	0.924658	0.563624	5	5	0	39	589	902
423	>sp|Q61361|PGCB_MOUSE Brevican core protein OS=Mus musculus OX=10090 GN=Bcan PE=1 SV=2	30	29	33	25	22	31	28	30	29	23	22	28	35	29	24	1.01439	0.870877	5	5	0	39	588	883
424	>sp|Q8R5C5|ACTY_MOUSE Beta-centractin OS=Mus musculus OX=10090 GN=Actr1b PE=1 SV=1	31	10	36	31	26	29	34	28	39	31	22	35	35	28	37	1.20149	0.303148	5	5	0	39	586	376
425	>sp|P80317|TCPZ_MOUSE T-complex protein 1 subunit zeta OS=Mus musculus OX=10090 GN=Cct6a PE=1 SV=3	33	39	36	31	27	33	32	25	32	23	20	27	30	38	24	0.873494	0.188594	5	5	0	39	581	531
426	>sp|Q9JJV2|PROF2_MOUSE Profilin-2 OS=Mus musculus OX=10090 GN=Pfn2 PE=1 SV=3	27	28	25	20	34	20	27	32	23	34	32	25	39	22	32	1.01493	0.911212	5	5	0	39	575	140
427	>sp|Q9D6J6|NDUV2_MOUSE NADH dehydrogenase [ubiquinone] flavoprotein 2, mitochondrial OS=Mus musculus OX=10090 GN=Ndufv2 PE=1 SV=2	38	32	30	27	28	16	29	29	26	27	39	24	31	26	30	0.819355	0.109257	5	5	0	39	570	248
428	>sp|P12382|PFKAL_MOUSE ATP-dependent 6-phosphofructokinase, liver type OS=Mus musculus OX=10090 GN=Pfkl PE=1 SV=4	25	34	20	34	31	30	26	28	26	20	26	17	29	33	39	0.902778	0.409254	5	5	0	39	547	780
429	>sp|Q9D0F9|PGM1_MOUSE Phosphoglucomutase-1 OS=Mus musculus OX=10090 GN=Pgm1 PE=1 SV=4	27	28	25	29	35	22	29	22	37	24	16	NaN	28	39	29	0.930556	0.562847	5	5	0	39	544	562
430	>sp|Q9CWZ7|SNAG_MOUSE Gamma-soluble NSF attachment protein OS=Mus musculus OX=10090 GN=Napg PE=1 SV=1	36	28	26	39	28	33	16	21	28	26	15	22	27	36	25	0.789809	0.12785	5	5	0	39	531	312
431	>sp|P63330|PP2AA_MOUSE Serine/threonine-protein phosphatase 2A catalytic subunit alpha isoform OS=Mus musculus OX=10090 GN=Ppp2ca PE=1 SV=1	31	29	30	27	23	21	28	33	NaN	29	27	32	32	35	39	0.991071	0.92924	5	4	0	39	529	309
432	>sp|Q61490|CD166_MOUSE CD166 antigen OS=Mus musculus OX=10090 GN=Alcam PE=1 SV=3	NaN	22	25	19	29	22	26	28	NaN	25	30	24	33	25	31	1.06316	0.566661	4	4	0	39	500	583
433	>sp|P63001|RAC1_MOUSE Ras-related C3 botulinum toxin substrate 1 OS=Mus musculus OX=10090 GN=Rac1 PE=1 SV=1	30	36	34	31	23	17	20	19	35	22	18	15	20	29	39	0.733766	0.0685893	5	5	0	39	490	192
434	>sp|Q62188|DPYL3_MOUSE Dihydropyrimidinase-related protein 3 OS=Mus musculus OX=10090 GN=Dpysl3 PE=1 SV=1	NaN	24	30	23	32	27	NaN	34	38	NaN	27	NaN	NaN	28	27	1.21101	0.186098	4	3	0	39	417	570
435	>sp|O08532-5|CA2D1_MOUSE Isoform 2E of Voltage-dependent calcium channel subunit alpha-2/delta-1 OS=Mus musculus OX=10090 GN=Cacna2d1	NaN	NaN	NaN	34	NaN	32	39	28	NaN	28	28	28	NaN	NaN	26	0.933824	#DIV/0!	1	4	0	39	324	1091
436	>tr|G3UYZ1|G3UYZ1_MOUSE Immunoglobulin superfamily member 8 OS=Mus musculus OX=10090 GN=Igsf8 PE=1 SV=1	30	24	4	NaN	2	25	31	3	NaN	31	20	NaN	31	1	3	1.5	0.468372	4	4	0	39	310	548
437	>tr|Q3TT92|Q3TT92_MOUSE Dihydropyrimidinase-related protein 3 OS=Mus musculus OX=10090 GN=Dpysl3 PE=1 SV=1	29	NaN	NaN	NaN	NaN	NaN	39	NaN	NaN	NaN	NaN	NaN	28	NaN	NaN	1.34483	#DIV/0!	1	1	0	39	127	568
438	>sp|Q91XM9-7|DLG2_MOUSE Isoform 7 of Disks large homolog 2 OS=Mus musculus OX=10090 GN=Dlg2	NaN	NaN	39	36	NaN	NaN	NaN	NaN	NaN	NaN	NaN	30	NaN	NaN	NaN	#DIV/0!	#DIV/0!	2	0	0	39	105	976
439	>tr|A0A571BDG0|A0A571BDG0_MOUSE SRC kinase-signaling inhibitor 1 OS=Mus musculus OX=10090 GN=Srcin1 PE=1 SV=1	NaN	NaN	NaN	NaN	NaN	NaN	NaN	38	NaN	NaN	NaN	39	NaN	NaN	NaN	#DIV/0!	#DIV/0!	0	1	0	39	77	1225
440	>sp|Q9Z0E0|NCDN_MOUSE Neurochondrin OS=Mus musculus OX=10090 GN=Ncdn PE=1 SV=1	1	1	3	1	NaN	NaN	39	NaN	NaN	NaN	NaN	NaN	NaN	1	NaN	26	#DIV/0!	4	1	0	39	47	729
441	>tr|E9Q0U7|E9Q0U7_MOUSE Heat shock protein 105 kDa OS=Mus musculus OX=10090 GN=Hsph1 PE=1 SV=1	NaN	39	NaN	NaN	NaN	NaN	NaN	NaN	NaN	NaN	NaN	NaN	NaN	NaN	NaN	#DIV/0!	#DIV/0!	1	0	0	39	39	817
442	>sp|Q9R0Y5|KAD1_MOUSE Adenylate kinase isoenzyme 1 OS=Mus musculus OX=10090 GN=Ak1 PE=1 SV=1	37	32	28	32	29	33	29	36	25	34	36	38	34	30	34	0.993671	0.938545	5	5	0	38	663	194
443	>sp|P80316|TCPE_MOUSE T-complex protein 1 subunit epsilon OS=Mus musculus OX=10090 GN=Cct5 PE=1 SV=1	32	35	37	29	35	22	28	32	35	28	36	33	33	32	36	0.863095	0.114821	5	5	0	38	648	541
444	>sp|Q9R1Q8|TAGL3_MOUSE Transgelin-3 OS=Mus musculus OX=10090 GN=Tagln3 PE=1 SV=1	32	32	37	33	30	26	25	29	36	30	26	29	29	30	32	0.890244	0.148879	5	5	0	38	631	199
445	>sp|Q9Z1G3|VATC1_MOUSE V-type proton ATPase subunit C 1 OS=Mus musculus OX=10090 GN=Atp6v1c1 PE=1 SV=4	31	31	24	34	23	36	33	31	33	30	31	28	33	24	25	1.13986	0.132969	5	5	0	38	604	382
446	>sp|Q3UHD9|AGAP2_MOUSE Arf-GAP with GTPase, ANK repeat and PH domain-containing protein 2 OS=Mus musculus OX=10090 GN=Agap2 PE=1 SV=1	37	36	35	31	23	15	27	29	28	21	35	18	36	32	36	0.740741	0.0519798	5	5	0	38	575	1186
447	>sp|P19246|NFH_MOUSE Neurofilament heavy polypeptide OS=Mus musculus OX=10090 GN=Nefh PE=1 SV=3	32	31	33	26	25	16	24	28	18	31	24	28	27	26	27	0.795918	0.105595	5	5	0	38	536	1090
448	>sp|P10852|4F2_MOUSE 4F2 cell-surface antigen heavy chain OS=Mus musculus OX=10090 GN=Slc3a2 PE=1 SV=1	24	31	NaN	NaN	32	29	23	27	28	31	33	33	31	27	37	0.951724	0.602922	3	5	0	38	514	526
449	>sp|Q9Z2I0|LETM1_MOUSE Mitochondrial proton/calcium exchanger protein OS=Mus musculus OX=10090 GN=Letm1 PE=1 SV=1	16	23	17	24	20	27	26	21	25	18	28	30	27	21	25	1.17	0.180137	5	5	0	38	494	738
450	>sp|Q80TZ3|AUXI_MOUSE Putative tyrosine-protein phosphatase auxilin OS=Mus musculus OX=10090 GN=Dnajc6 PE=1 SV=2	31	35	1	1	NaN	11	NaN	36	NaN	37	30	22	35	1	32	1.64706	0.438649	4	3	0	38	406	938
451	>sp|P84086|CPLX2_MOUSE Complexin-2 OS=Mus musculus OX=10090 GN=Cplx2 PE=1 SV=1	18	24	36	22	6	18	22	13	10	14	23	24	12	38	23	0.726415	0.303314	5	5	0	38	387	134
452	>sp|Q9QXZ0|MACF1_MOUSE Microtubule-actin cross-linking factor 1 OS=Mus musculus OX=10090 GN=Macf1 PE=1 SV=2	32	NaN	NaN	NaN	NaN	24	33	NaN	NaN	31	29	NaN	6	38	NaN	0.916667	#DIV/0!	1	3	0	38	225	7354
453	>tr|A0A571BG39|A0A571BG39_MOUSE SRC kinase-signaling inhibitor 1 OS=Mus musculus OX=10090 GN=Srcin1 PE=1 SV=1	NaN	NaN	NaN	38	NaN	NaN	NaN	NaN	NaN	NaN	NaN	NaN	NaN	NaN	NaN	#DIV/0!	#DIV/0!	1	0	0	38	72	1357
454	>tr|E9PWE8|E9PWE8_MOUSE Dihydropyrimidinase-related protein 3 OS=Mus musculus OX=10090 GN=Dpysl3 PE=1 SV=1	NaN	NaN	NaN	NaN	NaN	NaN	NaN	NaN	NaN	31	NaN	38	NaN	NaN	NaN	#DIV/0!	#DIV/0!	0	1	0	38	69	683
455	>sp|P10630-2|IF4A2_MOUSE Isoform 2 of Eukaryotic initiation factor 4A-II OS=Mus musculus OX=10090 GN=Eif4a2	NaN	NaN	NaN	NaN	NaN	NaN	NaN	NaN	NaN	NaN	NaN	NaN	NaN	NaN	38	#DIV/0!	#DIV/0!	0	0	0	38	38	408
456	>sp|P23819-3|GRIA2_MOUSE Isoform 3 of Glutamate receptor 2 OS=Mus musculus OX=10090 GN=Gria2	NaN	38	NaN	NaN	NaN	NaN	NaN	NaN	NaN	NaN	NaN	NaN	NaN	NaN	NaN	#DIV/0!	#DIV/0!	1	0	0	38	38	939
457	>tr|Q3V117|Q3V117_MOUSE ATP-citrate synthase OS=Mus musculus OX=10090 GN=Acly PE=1 SV=1	NaN	NaN	NaN	NaN	NaN	NaN	NaN	NaN	NaN	NaN	NaN	NaN	38	NaN	NaN	#DIV/0!	#DIV/0!	0	0	0	38	38	1101
458	>sp|Q9CWS0|DDAH1_MOUSE N(G),N(G)-dimethylarginine dimethylaminohydrolase 1 OS=Mus musculus OX=10090 GN=Ddah1 PE=1 SV=3	32	35	28	28	26	26	25	21	28	37	24	26	23	26	35	0.919463	0.463096	5	5	0	37	551	285
459	>sp|P31786|ACBP_MOUSE Acyl-CoA-binding protein OS=Mus musculus OX=10090 GN=Dbi PE=1 SV=2	32	18	16	18	17	25	NaN	18	23	26	31	21	14	26	20	1.13861	0.475724	5	4	0	37	429	87
460	>sp|Q8BGZ1|HPCL4_MOUSE Hippocalcin-like protein 4 OS=Mus musculus OX=10090 GN=Hpcal4 PE=1 SV=3	16	21	15	10	21	37	28	19	18	15	20	24	22	15	24	1.40964	0.171715	5	5	0	37	415	191
461	>sp|Q80TZ3-2|AUXI_MOUSE Isoform 2 of Putative tyrosine-protein phosphatase auxilin OS=Mus musculus OX=10090 GN=Dnajc6	1	1	29	31	33	NaN	26	1	31	1	1	NaN	1	33	NaN	0.776316	0.708835	5	4	0	37	227	900
462	>sp|O08532-4|CA2D1_MOUSE Isoform 2D of Voltage-dependent calcium channel subunit alpha-2/delta-1 OS=Mus musculus OX=10090 GN=Cacna2d1	33	31	37	NaN	36	NaN	NaN	NaN	33	NaN	NaN	NaN	NaN	28	NaN	0.963504	#DIV/0!	4	1	0	37	225	1086
463	>tr|A0A3Q4EBK4|A0A3Q4EBK4_MOUSE Myc box-dependent-interacting protein 1 OS=Mus musculus OX=10090 GN=Bin1 PE=1 SV=1	37	NaN	NaN	NaN	NaN	NaN	NaN	NaN	NaN	1	NaN	27	NaN	30	NaN	0.027027	#DIV/0!	1	1	0	37	129	410
464	>sp|P80315|TCPD_MOUSE T-complex protein 1 subunit delta OS=Mus musculus OX=10090 GN=Cct4 PE=1 SV=3	33	23	31	27	36	22	21	19	31	28	16	23	34	25	25	0.806667	0.108933	5	5	0	36	539	539
465	>sp|P55066|NCAN_MOUSE Neurocan core protein OS=Mus musculus OX=10090 GN=Ncan PE=1 SV=1	NaN	29	25	NaN	31	34	32	33	30	29	24	NaN	36	29	31	1.11529	0.117067	3	5	0	36	480	1268
466	>sp|Q91WC3|ACSL6_MOUSE Long-chain-fatty-acid--CoA ligase 6 OS=Mus musculus OX=10090 GN=Acsl6 PE=1 SV=1	19	28	23	21	1	16	28	21	34	24	26	25	29	22	36	1.33696	0.294296	5	5	0	36	460	697
467	>sp|Q8CAA7|PGM2L_MOUSE Glucose 1,6-bisphosphate synthase OS=Mus musculus OX=10090 GN=Pgm2l1 PE=1 SV=1	19	32	16	23	15	14	13	20	25	19	14	15	19	17	22	0.866667	0.479304	5	5	0	36	394	621
468	>sp|P63082|VATL_MOUSE V-type proton ATPase 16 kDa proteolipid subunit OS=Mus musculus OX=10090 GN=Atp6v0c PE=1 SV=1	24	20	10	18	9	20	21	15	16	18	32	12	7	22	13	1.11111	0.579966	5	5	0	36	350	155
469	>tr|E9Q8N8|E9Q8N8_MOUSE Anion exchange protein OS=Mus musculus OX=10090 GN=Slc4a4 PE=1 SV=1	22	23	16	23	15	14	15	NaN	22	26	NaN	NaN	16	22	35	0.972222	0.869313	5	4	0	36	322	1094
470	>sp|P23819|GRIA2_MOUSE Glutamate receptor 2 OS=Mus musculus OX=10090 GN=Gria2 PE=1 SV=3	NaN	NaN	NaN	NaN	NaN	NaN	NaN	NaN	NaN	26	36	30	NaN	NaN	NaN	#DIV/0!	#DIV/0!	0	1	0	36	92	883
471	>tr|B1AQX7|B1AQX7_MOUSE SRC kinase-signaling inhibitor 1 OS=Mus musculus OX=10090 GN=Srcin1 PE=1 SV=1	NaN	1	NaN	NaN	NaN	NaN	1	1	NaN	NaN	36	1	NaN	2	1	1	#DIV/0!	1	2	0	36	45	1198
472	>sp|Q8BKX1-2|BAIP2_MOUSE Isoform 2 of Brain-specific angiogenesis inhibitor 1-associated protein 2 OS=Mus musculus OX=10090 GN=Baiap2	36	NaN	NaN	NaN	NaN	NaN	NaN	NaN	NaN	NaN	NaN	NaN	NaN	NaN	NaN	#DIV/0!	#DIV/0!	1	0	0	36	36	522
473	>tr|Q9D881|Q9D881_MOUSE Cytochrome c oxidase subunit 5B, mitochondrial OS=Mus musculus OX=10090 GN=Cox5b-ps PE=1 SV=1	NaN	NaN	NaN	36	NaN	NaN	NaN	NaN	NaN	NaN	NaN	NaN	NaN	NaN	NaN	#DIV/0!	#DIV/0!	1	0	0	36	36	129
474	>sp|Q9DC69|NDUA9_MOUSE NADH dehydrogenase [ubiquinone] 1 alpha subcomplex subunit 9, mitochondrial OS=Mus musculus OX=10090 GN=Ndufa9 PE=1 SV=2	33	30	28	32	34	28	23	26	34	26	35	21	28	26	30	0.872611	0.0966909	5	5	0	35	585	377
475	>sp|Q8K310|MATR3_MOUSE Matrin-3 OS=Mus musculus OX=10090 GN=Matr3 PE=1 SV=1	30	29	27	30	24	27	26	29	26	25	28	32	29	33	28	0.95	0.322117	5	5	0	35	561	846
476	>sp|Q80SW1|SAHH2_MOUSE S-adenosylhomocysteine hydrolase-like protein 1 OS=Mus musculus OX=10090 GN=Ahcyl1 PE=1 SV=1	25	24	35	32	31	22	22	23	26	34	20	26	29	31	24	0.863946	0.233203	5	5	0	35	551	530
477	>sp|P42669|PURA_MOUSE Transcriptional activator protein Pur-alpha OS=Mus musculus OX=10090 GN=Pura PE=1 SV=1	27	25	28	34	28	27	28	23	26	35	25	23	28	28	23	0.978873	0.815642	5	5	0	35	540	321
478	>sp|Q9WUM5|SUCA_MOUSE Succinate--CoA ligase [ADP/GDP-forming] subunit alpha, mitochondrial OS=Mus musculus OX=10090 GN=Suclg1 PE=1 SV=4	30	31	22	35	29	23	21	20	21	22	30	18	27	26	26	0.727891	0.00619859	5	5	0	35	522	346
479	>sp|P80313|TCPH_MOUSE T-complex protein 1 subunit eta OS=Mus musculus OX=10090 GN=Cct7 PE=1 SV=1	19	29	23	30	19	18	26	35	28	27	25	19	27	24	35	1.11667	0.458747	5	5	0	35	520	544
480	>sp|Q8K183|PDXK_MOUSE Pyridoxal kinase OS=Mus musculus OX=10090 GN=Pdxk PE=1 SV=1	30	26	24	19	28	17	28	16	35	22	26	26	21	32	27	0.929134	0.666772	5	5	0	35	516	312
481	>sp|O35098|DPYL4_MOUSE Dihydropyrimidinase-related protein 4 OS=Mus musculus OX=10090 GN=Dpysl4 PE=1 SV=1	NaN	28	25	24	25	20	24	32	32	24	30	22	26	24	26	1.03529	0.75939	4	5	0	35	498	572
482	>sp|Q9D8N0|EF1G_MOUSE Elongation factor 1-gamma OS=Mus musculus OX=10090 GN=Eef1g PE=1 SV=3	27	27	24	23	29	18	24	26	20	35	17	20	31	20	28	0.946154	0.669079	5	5	0	35	479	437
483	>sp|P56391|CX6B1_MOUSE Cytochrome c oxidase subunit 6B1 OS=Mus musculus OX=10090 GN=Cox6b1 PE=1 SV=2	22	25	20	24	23	11	20	20	19	20	35	35	20	30	25	0.789474	0.0399685	5	5	0	35	476	86
484	>sp|P29341|PABP1_MOUSE Polyadenylate-binding protein 1 OS=Mus musculus OX=10090 GN=Pabpc1 PE=1 SV=2	25	27	21	35	26	21	27	13	22	26	28	16	25	25	23	0.813433	0.176577	5	5	0	35	471	636
485	>sp|Q920I9|WDR7_MOUSE WD repeat-containing protein 7 OS=Mus musculus OX=10090 GN=Wdr7 PE=1 SV=3	23	35	29	24	24	10	22	25	33	20	20	23	28	17	32	0.814815	0.284495	5	5	0	35	468	1489
486	>sp|P10630|IF4A2_MOUSE Eukaryotic initiation factor 4A-II OS=Mus musculus OX=10090 GN=Eif4a2 PE=1 SV=2	10	30	24	31	31	18	33	5	32	30	5	20	11	10	NaN	0.936508	0.817479	5	5	0	35	434	407
487	>tr|Q6PGJ3|Q6PGJ3_MOUSE L1 cell adhesion molecule OS=Mus musculus OX=10090 GN=L1cam PE=1 SV=1	28	33	22	28	18	24	23	NaN	24	22	NaN	21	25	27	NaN	0.901163	0.42273	5	4	0	35	434	1259
488	>sp|B2RSH2|GNAI1_MOUSE Guanine nucleotide-binding protein G(i) subunit alpha-1 OS=Mus musculus OX=10090 GN=Gnai1 PE=1 SV=1	24	35	22	28	21	10	22	17	26	27	14	18	14	27	32	0.784615	0.203592	5	5	0	35	424	354
489	>sp|P61164|ACTZ_MOUSE Alpha-centractin OS=Mus musculus OX=10090 GN=Actr1a PE=1 SV=1	7	33	9	12	12	9	11	9	10	10	12	12	14	11	11	0.671233	0.338141	5	5	0	35	259	376
490	>tr|B1AQZ0|B1AQZ0_MOUSE Septin-8 OS=Mus musculus OX=10090 GN=Septin8 PE=1 SV=1	NaN	23	21	22	NaN	22	NaN	20	NaN	NaN	20	13	33	NaN	25	0.954545	0.41277	3	2	0	35	256	484
491	>sp|P51150|RAB7A_MOUSE Ras-related protein Rab-7a OS=Mus musculus OX=10090 GN=Rab7a PE=1 SV=2	31	29	27	26	34	23	21	29	29	34	29	20	26	24	34	0.92517	0.444996	5	5	0	34	554	207
492	>sp|Q9CZC8|SCRN1_MOUSE Secernin-1 OS=Mus musculus OX=10090 GN=Scrn1 PE=1 SV=1	25	34	28	34	21	22	27	25	23	25	22	28	32	30	23	0.859155	0.174904	5	5	0	34	534	414
493	>sp|P31938|MP2K1_MOUSE Dual specificity mitogen-activated protein kinase kinase 1 OS=Mus musculus OX=10090 GN=Map2k1 PE=1 SV=2	28	31	26	34	31	20	32	27	25	29	15	19	22	25	25	0.886667	0.201197	5	5	0	34	528	393
494	>tr|Q8C845|Q8C845_MOUSE EF-hand domain-containing protein D2 OS=Mus musculus OX=10090 GN=Efhd2 PE=1 SV=1	32	32	16	25	28	28	30	21	27	27	31	34	14	25	28	1	1	5	5	0	34	526	240
495	>sp|Q99N28|CADM3_MOUSE Cell adhesion molecule 3 OS=Mus musculus OX=10090 GN=Cadm3 PE=1 SV=1	30	28	32	22	34	19	22	20	29	31	33	16	26	22	23	0.828767	0.155727	5	5	0	34	510	396
496	>sp|B0V2N1|PTPRS_MOUSE Receptor-type tyrosine-protein phosphatase S OS=Mus musculus OX=10090 GN=Ptprs PE=1 SV=1	23	15	25	23	28	17	15	32	31	25	21	27	24	27	28	1.05263	0.777404	5	5	0	34	498	1907
497	>sp|Q9D819|IPYR_MOUSE Inorganic pyrophosphatase OS=Mus musculus OX=10090 GN=Ppa1 PE=1 SV=1	19	27	19	22	23	11	20	32	25	22	30	27	23	21	22	1	1	5	5	0	34	481	289
498	>sp|P70404|IDHG1_MOUSE Isocitrate dehydrogenase [NAD] subunit gamma 1, mitochondrial OS=Mus musculus OX=10090 GN=Idh3g PE=1 SV=1	21	23	26	18	28	14	20	23	21	25	23	22	34	20	29	0.887931	0.341142	5	5	0	34	471	393
499	>sp|Q9D0M5|DYL2_MOUSE Dynein light chain 2, cytoplasmic OS=Mus musculus OX=10090 GN=Dynll2 PE=1 SV=1	34	21	21	23	21	18	24	20	22	30	25	26	25	28	19	0.95	0.722503	5	5	0	34	471	89
500	>sp|P47708|RP3A_MOUSE Rabphilin-3A OS=Mus musculus OX=10090 GN=Rph3a PE=1 SV=2	29	29	30	24	25	29	16	14	14	25	22	14	30	24	23	0.715328	0.047485	5	5	0	34	469	681
501	>sp|Q01065|PDE1B_MOUSE Calcium/calmodulin-dependent 3',5'-cyclic nucleotide phosphodiesterase 1B OS=Mus musculus OX=10090 GN=Pde1b PE=1 SV=2	19	34	26	30	16	20	11	7	24	24	10	17	23	24	17	0.688	0.145078	5	5	0	34	408	535
502	>sp|Q9EQH3|VPS35_MOUSE Vacuolar protein sorting-associated protein 35 OS=Mus musculus OX=10090 GN=Vps35 PE=1 SV=1	21	22	19	24	27	13	22	17	34	14	11	19	18	23	16	0.884956	0.540735	5	5	0	34	395	796
503	>sp|Q8BW75|AOFB_MOUSE Amine oxidase [flavin-containing] B OS=Mus musculus OX=10090 GN=Maob PE=1 SV=4	12	28	13	12	34	8	14	13	18	13	18	12	18	10	28	0.666667	0.218092	5	5	0	34	321	520
504	>sp|Q9Z0P4|PALM_MOUSE Paralemmin-1 OS=Mus musculus OX=10090 GN=Palm PE=1 SV=1	1	22	1	2	NaN	2	NaN	26	27	1	NaN	2	16	34	19	2.15385	0.430892	4	4	0	34	162	383
505	>tr|A0A0R4IZX5|A0A0R4IZX5_MOUSE Neurocan core protein OS=Mus musculus OX=10090 GN=Ncan PE=1 SV=1	24	NaN	NaN	29	NaN	NaN	NaN	NaN	NaN	NaN	NaN	18	NaN	NaN	NaN	#DIV/0!	#DIV/0!	2	0	0	34	105	1268
506	>tr|G5E8H1|G5E8H1_MOUSE Glutamate receptor 2 OS=Mus musculus OX=10090 GN=Gria2 PE=1 SV=1	NaN	NaN	NaN	1	NaN	NaN	NaN	NaN	1	NaN	NaN	NaN	NaN	NaN	NaN	1	#DIV/0!	1	1	0	34	36	883
507	>sp|P48036|ANXA5_MOUSE Annexin A5 OS=Mus musculus OX=10090 GN=Anxa5 PE=1 SV=1	24	25	23	29	23	31	24	30	25	33	29	27	19	29	32	1.15323	0.104233	5	5	0	33	542	319
508	>sp|Q99PT1|GDIR1_MOUSE Rho GDP-dissociation inhibitor 1 OS=Mus musculus OX=10090 GN=Arhgdia PE=1 SV=3	29	32	21	31	23	22	31	27	31	26	26	27	28	23	19	1.00735	0.944312	5	5	0	33	535	204
509	>sp|Q4KMM3|OXR1_MOUSE Oxidation resistance protein 1 OS=Mus musculus OX=10090 GN=Oxr1 PE=1 SV=3	24	22	18	33	22	31	26	29	31	27	25	27	26	26	24	1.21008	0.100991	5	5	0	33	531	866
510	>sp|Q8BGQ7|SYAC_MOUSE Alanine--tRNA ligase, cytoplasmic OS=Mus musculus OX=10090 GN=Aars1 PE=1 SV=1	24	30	25	28	29	13	20	29	24	26	33	27	27	28	26	0.823529	0.148266	5	5	0	33	522	968
511	>sp|Q8BG39|SV2B_MOUSE Synaptic vesicle glycoprotein 2B OS=Mus musculus OX=10090 GN=Sv2b PE=1 SV=1	20	23	20	27	28	15	33	25	28	27	25	26	25	27	26	1.08475	0.573575	5	5	0	33	506	683
512	>sp|Q8K596|NAC2_MOUSE Sodium/calcium exchanger 2 OS=Mus musculus OX=10090 GN=Slc8a2 PE=1 SV=1	29	24	28	26	NaN	23	18	24	27	22	25	33	25	24	27	0.852336	0.0791082	4	5	0	33	488	921
513	>sp|P21279|GNAQ_MOUSE Guanine nucleotide-binding protein G(q) subunit alpha OS=Mus musculus OX=10090 GN=Gnaq PE=1 SV=4	23	22	23	21	11	17	19	33	27	23	25	30	24	27	24	1.19	0.330265	5	5	0	33	466	359
514	>sp|Q9D1A2|CNDP2_MOUSE Cytosolic non-specific dipeptidase OS=Mus musculus OX=10090 GN=Cndp2 PE=1 SV=1	16	18	20	22	20	23	16	20	31	28	23	23	20	24	33	1.22917	0.165214	5	5	0	33	462	475
515	>sp|P62908|RS3_MOUSE 40S ribosomal protein S3 OS=Mus musculus OX=10090 GN=Rps3 PE=1 SV=1	21	19	19	22	30	18	33	22	15	19	24	23	24	17	25	0.963964	0.834881	5	5	0	33	461	243
516	>sp|Q9QXS6|DREB_MOUSE Drebrin OS=Mus musculus OX=10090 GN=Dbn1 PE=1 SV=4	23	26	33	1	17	26	NaN	27	18	27	17	24	30	25	25	1.225	0.505923	5	4	0	33	446	706
517	>sp|P26883|FKB1A_MOUSE Peptidyl-prolyl cis-trans isomerase FKBP1A OS=Mus musculus OX=10090 GN=Fkbp1a PE=1 SV=2	23	25	24	22	33	15	31	21	22	22	23	13	16	21	24	0.874016	0.350122	5	5	0	33	433	108
518	>sp|P62827|RAN_MOUSE GTP-binding nuclear protein Ran OS=Mus musculus OX=10090 GN=Ran PE=1 SV=3	22	25	21	14	22	15	21	16	21	21	29	21	18	20	23	0.903846	0.405157	5	5	0	33	426	216
519	>sp|O35643|AP1B1_MOUSE AP-1 complex subunit beta-1 OS=Mus musculus OX=10090 GN=Ap1b1 PE=1 SV=2	19	28	23	23	NaN	15	21	32	23	27	25	18	NaN	19	33	1.01505	0.925705	4	5	0	33	425	943
520	>tr|A0A5F8MPL6|A0A5F8MPL6_MOUSE Neuronal-specific septin-3 OS=Mus musculus OX=10090 GN=Septin3 PE=1 SV=1	NaN	NaN	27	22	33	NaN	20	26	20	22	24	31	29	NaN	31	0.804878	0.150467	3	4	0	33	372	818
521	>tr|Q8R5L1|Q8R5L1_MOUSE Complement component 1 Q subcomponent-binding protein, mitochondrial OS=Mus musculus OX=10090 GN=C1qbp PE=1 SV=1	16	15	17	15	21	19	15	17	15	19	11	17	18	13	17	1.0119	0.892099	5	5	0	33	345	279
522	>sp|P48678|LMNA_MOUSE Prelamin-A/C OS=Mus musculus OX=10090 GN=Lmna PE=1 SV=2	22	20	26	33	12	16	8	8	12	14	9	9	10	32	15	0.513274	0.0203001	5	5	0	33	312	665
523	>sp|P42932|TCPQ_MOUSE T-complex protein 1 subunit theta OS=Mus musculus OX=10090 GN=Cct8 PE=1 SV=3	25	27	24	31	28	22	23	25	27	20	20	21	27	23	21	0.866667	0.069751	5	5	0	32	497	548
524	>sp|Q6PER3|MARE3_MOUSE Microtubule-associated protein RP/EB family member 3 OS=Mus musculus OX=10090 GN=Mapre3 PE=1 SV=1	23	25	23	25	31	23	21	31	22	23	26	18	22	32	26	0.944882	0.562128	5	5	0	32	497	281
525	>sp|Q9EQF6|DPYL5_MOUSE Dihydropyrimidinase-related protein 5 OS=Mus musculus OX=10090 GN=Dpysl5 PE=1 SV=1	26	31	32	25	26	28	19	23	25	24	24	22	21	21	23	0.85	0.075709	5	5	0	32	494	564
526	>sp|Q791V5|MTCH2_MOUSE Mitochondrial carrier homolog 2 OS=Mus musculus OX=10090 GN=Mtch2 PE=1 SV=1	22	26	21	24	24	14	20	28	23	25	28	30	25	19	32	0.940171	0.596797	5	5	0	32	482	303
527	>sp|P18242|CATD_MOUSE Cathepsin D OS=Mus musculus OX=10090 GN=Ctsd PE=1 SV=1	18	21	22	24	24	22	21	20	25	25	20	20	23	27	24	1.0367	0.612156	5	5	0	32	473	410
528	>sp|Q99KJ8|DCTN2_MOUSE Dynactin subunit 2 OS=Mus musculus OX=10090 GN=Dctn2 PE=1 SV=3	26	30	26	30	27	22	16	21	16	24	25	28	20	27	21	0.71223	0.00265694	5	5	0	32	469	402
529	>sp|Q9D6J5|NDUB8_MOUSE NADH dehydrogenase [ubiquinone] 1 beta subcomplex subunit 8, mitochondrial OS=Mus musculus OX=10090 GN=Ndufb8 PE=1 SV=1	27	27	16	21	23	13	20	24	21	32	25	26	21	27	24	0.964912	0.834527	5	5	0	32	465	186
530	>sp|O08788|DCTN1_MOUSE Dynactin subunit 1 OS=Mus musculus OX=10090 GN=Dctn1 PE=1 SV=3	19	27	30	26	20	22	NaN	27	25	21	13	17	32	29	29	0.973361	0.815497	5	4	0	32	460	1281
531	>sp|Q60625|ICAM5_MOUSE Intercellular adhesion molecule 5 OS=Mus musculus OX=10090 GN=Icam5 PE=1 SV=2	19	18	32	25	23	29	20	14	23	23	19	22	26	25	18	0.931624	0.659082	5	5	0	32	437	917
532	>sp|Q922S4|PDE2A_MOUSE cGMP-dependent 3',5'-cyclic phosphodiesterase OS=Mus musculus OX=10090 GN=Pde2a PE=1 SV=4	17	26	26	24	23	NaN	20	22	17	22	21	NaN	24	18	32	0.872845	0.211378	5	4	0	32	422	939
533	>sp|P08752|GNAI2_MOUSE Guanine nucleotide-binding protein G(i) subunit alpha-2 OS=Mus musculus OX=10090 GN=Gnai2 PE=1 SV=5	14	20	15	13	32	23	16	20	16	15	25	22	24	14	21	0.957447	0.839609	5	5	0	32	395	355
534	>sp|P60469|LIPA3_MOUSE Liprin-alpha-3 OS=Mus musculus OX=10090 GN=Ppfia3 PE=1 SV=2	14	27	19	25	19	14	14	18	15	18	12	15	18	20	20	0.759615	0.081115	5	5	0	32	379	1194
535	>sp|Q8CAY6|THIC_MOUSE Acetyl-CoA acetyltransferase, cytosolic OS=Mus musculus OX=10090 GN=Acat2 PE=1 SV=2	20	15	19	19	16	13	20	14	15	24	15	16	12	19	32	0.966292	0.800599	5	5	0	32	362	397
536	>sp|E9Q401|RYR2_MOUSE Ryanodine receptor 2 OS=Mus musculus OX=10090 GN=Ryr2 PE=1 SV=1	14	22	17	16	17	2	18	22	18	13	14	14	21	15	30	0.848837	0.502325	5	5	0	32	324	4966
537	>sp|P60843|IF4A1_MOUSE Eukaryotic initiation factor 4A-I OS=Mus musculus OX=10090 GN=Eif4a1 PE=1 SV=1	21	9	10	16	14	7	7	24	11	12	19	6	29	32	11	0.871429	0.648382	5	5	0	32	296	406
538	>sp|Q3TXX4|VGLU1_MOUSE Vesicular glutamate transporter 1 OS=Mus musculus OX=10090 GN=Slc17a7 PE=1 SV=2	18	29	9	16	30	11	9	4	29	19	3	NaN	1	20	32	0.705882	0.341608	5	5	0	32	278	560
539	>tr|E9Q1K3|E9Q1K3_MOUSE Alpha-adducin OS=Mus musculus OX=10090 GN=Add1 PE=1 SV=1	2	2	1	1	1	1	28	1	1	1	26	31	1	3	2	4.57143	0.382033	5	5	0	32	167	660
540	>sp|P43277|H13_MOUSE Histone H1.3 OS=Mus musculus OX=10090 GN=H1-3 PE=1 SV=2	3	10	13	7	10	6	7	6	32	9	NaN	7	7	10	10	1.39535	0.539625	5	5	0	32	150	221
541	>sp|P10852-2|4F2_MOUSE Isoform 2 of 4F2 cell-surface antigen heavy chain OS=Mus musculus OX=10090 GN=Slc3a2	NaN	NaN	28	31	NaN	NaN	NaN	2	NaN	NaN	1	NaN	NaN	1	NaN	0.0677966	#DIV/0!	2	1	0	32	95	565
542	>tr|A2AFG8|A2AFG8_MOUSE Neural cell adhesion molecule L1 OS=Mus musculus OX=10090 GN=L1cam PE=1 SV=1	NaN	NaN	NaN	NaN	NaN	NaN	NaN	32	NaN	NaN	NaN	NaN	NaN	NaN	26	#DIV/0!	#DIV/0!	0	1	0	32	58	1255
543	>sp|Q9WU78-3|PDC6I_MOUSE Isoform 3 of Programmed cell death 6-interacting protein OS=Mus musculus OX=10090 GN=Pdcd6ip	NaN	NaN	NaN	NaN	NaN	NaN	NaN	NaN	NaN	NaN	20	NaN	32	NaN	NaN	#DIV/0!	#DIV/0!	0	0	0	32	52	874
544	>tr|Q5SVG5|Q5SVG5_MOUSE AP complex subunit beta OS=Mus musculus OX=10090 GN=Ap1b1 PE=1 SV=1	NaN	NaN	NaN	NaN	NaN	NaN	NaN	NaN	NaN	NaN	NaN	NaN	32	NaN	NaN	#DIV/0!	#DIV/0!	0	0	0	32	32	916
545	>sp|Q9JKK7|TMOD2_MOUSE Tropomodulin-2 OS=Mus musculus OX=10090 GN=Tmod2 PE=1 SV=2	25	28	27	31	26	26	25	25	22	20	31	25	29	28	25	0.861314	0.0372413	5	5	0	31	535	351
546	>sp|Q02248|CTNB1_MOUSE Catenin beta-1 OS=Mus musculus OX=10090 GN=Ctnnb1 PE=1 SV=1	24	29	23	23	29	20	17	20	25	25	21	20	28	20	31	0.835937	0.0807991	5	5	0	31	468	781
547	>sp|Q99K85|SERC_MOUSE Phosphoserine aminotransferase OS=Mus musculus OX=10090 GN=Psat1 PE=1 SV=1	22	20	20	16	31	20	23	24	24	24	23	21	21	19	22	1.05505	0.658564	5	5	0	31	453	370
548	>sp|P14231|AT1B2_MOUSE Sodium/potassium-transporting ATPase subunit beta-2 OS=Mus musculus OX=10090 GN=Atp1b2 PE=1 SV=2	29	21	25	19	31	23	17	10	27	23	11	15	21	21	25	0.8	0.218208	5	5	0	31	425	290
549	>sp|P70168|IMB1_MOUSE Importin subunit beta-1 OS=Mus musculus OX=10090 GN=Kpnb1 PE=1 SV=2	17	23	16	31	19	15	29	18	27	21	21	18	17	20	23	1.03774	0.83852	5	5	0	31	415	876
550	>sp|D3YVF0|AKAP5_MOUSE A-kinase anchor protein 5 OS=Mus musculus OX=10090 GN=Akap5 PE=1 SV=2	31	23	28	28	21	19	14	13	11	31	18	18	22	NaN	16	0.671756	0.0657804	5	5	0	31	414	745
551	>sp|P48758|CBR1_MOUSE Carbonyl reductase [NADPH] 1 OS=Mus musculus OX=10090 GN=Cbr1 PE=1 SV=3	24	23	25	20	25	19	14	20	27	19	15	10	18	25	31	0.846154	0.153057	5	5	0	31	401	277
552	>sp|Q9ERS2|NDUAD_MOUSE NADH dehydrogenase [ubiquinone] 1 alpha subcomplex subunit 13 OS=Mus musculus OX=10090 GN=Ndufa13 PE=1 SV=3	21	16	12	19	21	31	18	20	29	19	13	19	25	18	26	1.31461	0.120687	5	5	0	31	397	144
553	>sp|O54991|CNTP1_MOUSE Contactin-associated protein 1 OS=Mus musculus OX=10090 GN=Cntnap1 PE=1 SV=2	14	29	22	19	17	10	22	15	27	20	24	14	16	18	14	0.930693	0.727793	5	5	0	31	375	1385
554	>sp|Q61411|RASH_MOUSE GTPase HRas OS=Mus musculus OX=10090 GN=Hras PE=1 SV=2	20	20	21	16	2	18	13	17	3	22	23	16	16	20	25	0.924051	0.80913	5	5	0	31	336	189
555	>sp|P60761|NEUG_MOUSE Neurogranin OS=Mus musculus OX=10090 GN=Nrgn PE=1 SV=1	23	8	13	19	8	5	11	19	8	14	8	16	9	31	6	0.802817	0.487473	5	5	0	31	265	78
556	>tr|E9Q452|E9Q452_MOUSE Tropomyosin alpha-1 chain OS=Mus musculus OX=10090 GN=Tpm1 PE=1 SV=1	NaN	11	NaN	1	NaN	NaN	NaN	NaN	26	31	NaN	NaN	11	NaN	NaN	4.75	0.0565436	2	2	0	31	105	281
557	>tr|E9Q3Q6|E9Q3Q6_MOUSE CD166 antigen OS=Mus musculus OX=10090 GN=Alcam PE=1 SV=1	30	NaN	NaN	NaN	NaN	NaN	NaN	NaN	31	NaN	NaN	NaN	NaN	NaN	NaN	1.03333	#DIV/0!	1	1	0	31	61	570
558	>sp|P62715|PP2AB_MOUSE Serine/threonine-protein phosphatase 2A catalytic subunit beta isoform OS=Mus musculus OX=10090 GN=Ppp2cb PE=1 SV=1	NaN	NaN	NaN	NaN	NaN	NaN	NaN	NaN	31	NaN	NaN	NaN	NaN	NaN	NaN	#DIV/0!	#DIV/0!	0	1	0	31	53	309
559	>sp|Q9JLM8|DCLK1_MOUSE Serine/threonine-protein kinase DCLK1 OS=Mus musculus OX=10090 GN=Dclk1 PE=1 SV=1	NaN	NaN	NaN	NaN	NaN	NaN	NaN	NaN	NaN	NaN	1	NaN	NaN	NaN	NaN	#DIV/0!	#DIV/0!	0	0	0	31	32	756
560	>sp|P60335|PCBP1_MOUSE Poly(rC)-binding protein 1 OS=Mus musculus OX=10090 GN=Pcbp1 PE=1 SV=1	19	20	21	26	27	16	21	21	24	22	25	17	24	21	24	0.920354	0.415796	5	5	0	30	453	356
561	>sp|Q7TQI3|OTUB1_MOUSE Ubiquitin thioesterase OTUB1 OS=Mus musculus OX=10090 GN=Otub1 PE=1 SV=2	17	22	24	23	22	12	30	21	22	17	21	27	23	22	21	0.944444	0.718449	5	5	0	30	445	271
562	>sp|Q80TL4|PHF24_MOUSE PHD finger protein 24 OS=Mus musculus OX=10090 GN=Phf24 PE=1 SV=2	25	24	19	27	21	17	20	17	28	17	21	25	18	24	30	0.853448	0.221619	5	5	0	30	436	400
563	>sp|O89053|COR1A_MOUSE Coronin-1A OS=Mus musculus OX=10090 GN=Coro1a PE=1 SV=5	22	25	24	30	16	22	13	23	22	19	28	20	20	26	24	0.846154	0.251944	5	5	0	30	431	461
564	>sp|P57746|VATD_MOUSE V-type proton ATPase subunit D OS=Mus musculus OX=10090 GN=Atp6v1d PE=1 SV=1	22	20	22	30	21	23	15	17	29	23	22	18	16	21	24	0.930435	0.615162	5	5	0	30	431	247
565	>sp|P59999|ARPC4_MOUSE Actin-related protein 2/3 complex subunit 4 OS=Mus musculus OX=10090 GN=Arpc4 PE=1 SV=3	18	21	14	16	30	14	27	28	29	24	20	16	20	14	28	1.23232	0.273397	5	5	0	30	425	168
566	>sp|P23506|PIMT_MOUSE Protein-L-isoaspartate(D-aspartate) O-methyltransferase OS=Mus musculus OX=10090 GN=Pcmt1 PE=1 SV=3	26	24	26	23	23	24	23	22	18	20	22	NaN	18	21	20	0.877049	0.0461723	5	5	0	30	422	227
567	>sp|Q9CPQ8|ATP5L_MOUSE ATP synthase subunit g, mitochondrial OS=Mus musculus OX=10090 GN=Atp5mg PE=1 SV=1	13	15	13	22	20	18	17	22	20	24	25	17	18	22	20	1.21687	0.149578	5	5	0	30	405	103
568	>sp|Q9CQJ8|NDUB9_MOUSE NADH dehydrogenase [ubiquinone] 1 beta subcomplex subunit 9 OS=Mus musculus OX=10090 GN=Ndufb9 PE=1 SV=3	19	27	20	23	16	14	16	25	19	19	30	20	20	24	22	0.885714	0.389557	5	5	0	30	405	179
569	>sp|Q925N0|SFXN5_MOUSE Sideroflexin-5 OS=Mus musculus OX=10090 GN=Sfxn5 PE=1 SV=2	19	19	16	16	14	13	21	22	18	26	17	25	13	21	24	1.19048	0.214753	5	5	0	30	396	342
570	>tr|V9GWV1|V9GWV1_MOUSE ADP-ribosylation factor GTPase-activating protein 1 OS=Mus musculus OX=10090 GN=Arfgap1 PE=1 SV=1	30	23	26	26	22	NaN	21	23	24	27	17	22	22	23	NaN	0.935039	0.420915	5	4	0	30	389	402
571	>sp|Q9WU78|PDC6I_MOUSE Programmed cell death 6-interacting protein OS=Mus musculus OX=10090 GN=Pdcd6ip PE=1 SV=3	16	19	25	30	29	21	18	20	24	17	NaN	27	NaN	21	14	0.840336	0.241862	5	5	0	30	387	869
572	>sp|Q91ZX7|LRP1_MOUSE Prolow-density lipoprotein receptor-related protein 1 OS=Mus musculus OX=10090 GN=Lrp1 PE=1 SV=1	15	24	19	17	16	14	14	21	23	13	14	16	26	17	21	0.934066	0.658564	5	5	0	30	363	4545
573	>sp|Q6PB66|LPPRC_MOUSE Leucine-rich PPR motif-containing protein, mitochondrial OS=Mus musculus OX=10090 GN=Lrpprc PE=1 SV=2	14	16	24	16	30	13	12	19	20	18	8	15	22	18	15	0.82	0.326418	5	5	0	30	333	1392
574	>sp|Q80Z38|SHAN2_MOUSE SH3 and multiple ankyrin repeat domains protein 2 OS=Mus musculus OX=10090 GN=Shank2 PE=1 SV=2	NaN	30	29	21	22	11	NaN	13	NaN	12	11	16	24	23	21	0.470588	0.00476225	4	3	0	30	311	1476
575	>sp|P35278|RAB5C_MOUSE Ras-related protein Rab-5C OS=Mus musculus OX=10090 GN=Rab5c PE=1 SV=2	21	7	8	10	10	22	13	12	7	10	30	12	10	10	5	1.14286	0.665121	5	5	0	30	264	216
576	>tr|E9PWX1|E9PWX1_MOUSE Dipeptidyl aminopeptidase-like protein 6 OS=Mus musculus OX=10090 GN=Dpp6 PE=1 SV=1	16	28	NaN	NaN	NaN	NaN	NaN	NaN	NaN	NaN	NaN	NaN	NaN	18	NaN	#DIV/0!	#DIV/0!	2	0	0	30	157	859
577	>sp|Q8BZ98|DYN3_MOUSE Dynamin-3 OS=Mus musculus OX=10090 GN=Dnm3 PE=1 SV=1	26	26	22	22	23	17	20	28	26	21	23	21	26	29	21	0.941176	0.544737	5	5	0	29	464	863
578	>sp|Q3UM45|PP1R7_MOUSE Protein phosphatase 1 regulatory subunit 7 OS=Mus musculus OX=10090 GN=Ppp1r7 PE=1 SV=2	25	24	17	24	15	18	21	21	27	19	21	21	29	21	22	1.00952	0.940486	5	5	0	29	448	361
579	>tr|A0A0G2JGQ6|A0A0G2JGQ6_MOUSE Serine/threonine-protein kinase DCLK1 OS=Mus musculus OX=10090 GN=Dclk1 PE=1 SV=1	22	28	24	29	28	23	28	22	26	23	24	20	23	23	23	0.931298	0.336541	5	5	0	29	448	739
580	>sp|Q9WTT4|VATG2_MOUSE V-type proton ATPase subunit G 2 OS=Mus musculus OX=10090 GN=Atp6v1g2 PE=1 SV=1	26	23	28	23	25	11	16	20	15	29	17	13	23	19	27	0.728	0.0663071	5	5	0	29	437	118
581	>sp|Q8R001|MARE2_MOUSE Microtubule-associated protein RP/EB family member 2 OS=Mus musculus OX=10090 GN=Mapre2 PE=1 SV=1	27	18	25	25	16	14	16	21	24	23	25	25	24	19	19	0.882883	0.401164	5	5	0	29	427	326
582	>sp|Q9QUI0|RHOA_MOUSE Transforming protein RhoA OS=Mus musculus OX=10090 GN=Rhoa PE=1 SV=1	22	15	14	19	20	19	29	21	21	20	26	25	23	19	17	1.22222	0.126475	5	5	0	29	410	193
583	>sp|P09103|PDIA1_MOUSE Protein disulfide-isomerase OS=Mus musculus OX=10090 GN=P4hb PE=1 SV=2	27	29	22	21	14	20	15	24	19	25	14	17	17	20	23	0.911504	0.547076	5	5	0	29	408	509
584	>sp|Q9Z268|RASL1_MOUSE RasGAP-activating-like protein 1 OS=Mus musculus OX=10090 GN=Rasal1 PE=1 SV=2	13	29	23	25	29	11	22	23	21	22	17	20	21	19	20	0.831933	0.309345	5	5	0	29	405	799
585	>sp|Q9QZM0|UBQL2_MOUSE Ubiquilin-2 OS=Mus musculus OX=10090 GN=Ubqln2 PE=1 SV=2	21	19	16	21	19	20	19	19	17	19	29	19	16	20	22	0.979167	0.710342	5	5	0	29	397	638
586	>sp|P06801|MAOX_MOUSE NADP-dependent malic enzyme OS=Mus musculus OX=10090 GN=Me1 PE=1 SV=2	13	27	17	19	19	11	22	19	23	19	19	21	21	24	29	0.989474	0.95022	5	5	0	29	388	572
587	>sp|Q06185|ATP5I_MOUSE ATP synthase subunit e, mitochondrial OS=Mus musculus OX=10090 GN=Atp5me PE=1 SV=2	18	18	22	17	28	11	22	15	27	17	28	14	19	13	24	0.893204	0.541788	5	5	0	29	388	71
588	>sp|P09405|NUCL_MOUSE Nucleolin OS=Mus musculus OX=10090 GN=Ncl PE=1 SV=2	29	16	18	24	22	18	19	13	13	23	23	12	17	23	21	0.788991	0.161248	5	5	0	29	384	707
589	>sp|Q8CGY8-2|OGT1_MOUSE Isoform 2 of UDP-N-acetylglucosamine--peptide N-acetylglucosaminyltransferase 110 kDa subunit OS=Mus musculus OX=10090 GN=Ogt	16	29	17	17	20	NaN	13	27	26	23	10	14	29	20	29	1.12374	0.550586	5	4	0	29	380	1036
590	>sp|Q61753|SERA_MOUSE D-3-phosphoglycerate dehydrogenase OS=Mus musculus OX=10090 GN=Phgdh PE=1 SV=3	23	29	19	25	25	15	11	16	19	20	15	15	20	15	24	0.669421	0.00790354	5	5	0	29	378	533
591	>sp|Q9DB05|SNAA_MOUSE Alpha-soluble NSF attachment protein OS=Mus musculus OX=10090 GN=Napa PE=1 SV=1	16	24	19	23	15	20	22	20	16	16	14	17	14	25	17	0.969072	0.788981	5	5	0	29	378	295
592	>sp|P11881|ITPR1_MOUSE Inositol 1,4,5-trisphosphate receptor type 1 OS=Mus musculus OX=10090 GN=Itpr1 PE=1 SV=2	16	29	NaN	19	29	14	18	23	NaN	26	NaN	13	29	20	25	0.870968	0.511149	4	4	0	29	368	2749
593	>sp|Q62425|NDUA4_MOUSE Cytochrome c oxidase subunit NDUFA4 OS=Mus musculus OX=10090 GN=Ndufa4 PE=1 SV=2	19	29	18	19	16	9	18	18	29	11	15	20	12	22	16	0.841584	0.465528	5	5	0	29	360	82
594	>sp|O70161|PI51C_MOUSE Phosphatidylinositol 4-phosphate 5-kinase type-1 gamma OS=Mus musculus OX=10090 GN=Pip5k1c PE=1 SV=2	16	21	29	25	24	14	16	19	15	15	15	14	13	21	17	0.686957	0.014958	5	5	0	29	352	661
595	>sp|P28738|KIF5C_MOUSE Kinesin heavy chain isoform 5C OS=Mus musculus OX=10090 GN=Kif5c PE=1 SV=3	16	14	21	29	25	17	10	14	19	22	13	13	18	19	21	0.780952	0.220146	5	5	0	29	352	956
596	>sp|Q8R3V5|SHLB2_MOUSE Endophilin-B2 OS=Mus musculus OX=10090 GN=Sh3glb2 PE=1 SV=2	27	29	28	NaN	NaN	NaN	21	20	24	22	19	24	20	NaN	16	0.776786	0.0025463	3	4	0	29	339	400
597	>sp|Q99K48|NONO_MOUSE Non-POU domain-containing octamer-binding protein OS=Mus musculus OX=10090 GN=Nono PE=1 SV=3	18	18	13	14	15	12	20	10	17	19	17	10	10	22	18	1	1	5	5	0	29	331	473
598	>sp|P27546|MAP4_MOUSE Microtubule-associated protein 4 OS=Mus musculus OX=10090 GN=Map4 PE=1 SV=3	16	22	29	18	12	18	12	22	6	13	24	16	18	14	11	0.731959	0.227139	5	5	0	29	317	1125
599	>sp|Q9EPN1|NBEA_MOUSE Neurobeachin OS=Mus musculus OX=10090 GN=Nbea PE=1 SV=1	18	21	21	18	22	8	15	NaN	21	18	15	16	NaN	29	NaN	0.775	0.129911	5	4	0	29	292	2936
600	>tr|Q5ICG5|Q5ICG5_MOUSE Long chain acyl-CoA synthetase 6 isoform 3 OS=Mus musculus OX=10090 GN=Acsl6 PE=1 SV=1	NaN	1	1	1	29	NaN	NaN	NaN	2	1	NaN	NaN	NaN	NaN	NaN	0.1875	0.569557	4	2	0	29	37	697
601	>sp|Q61699-2|HS105_MOUSE Isoform HSP105-beta of Heat shock protein 105 kDa OS=Mus musculus OX=10090 GN=Hsph1	NaN	NaN	NaN	NaN	NaN	NaN	NaN	NaN	NaN	NaN	NaN	NaN	NaN	NaN	NaN	#DIV/0!	#DIV/0!	0	0	0	29	29	814
602	>sp|Q810U4|NRCAM_MOUSE Neuronal cell adhesion molecule OS=Mus musculus OX=10090 GN=Nrcam PE=1 SV=2	NaN	NaN	NaN	NaN	NaN	NaN	NaN	29	NaN	NaN	NaN	NaN	NaN	NaN	NaN	#DIV/0!	#DIV/0!	0	1	0	29	29	1256
603	>sp|P53994|RAB2A_MOUSE Ras-related protein Rab-2A OS=Mus musculus OX=10090 GN=Rab2a PE=1 SV=1	26	21	22	25	26	17	22	26	25	16	26	26	21	24	27	0.883333	0.256065	5	5	0	28	469	212
604	>sp|Q91WS0|CISD1_MOUSE CDGSH iron-sulfur domain-containing protein 1 OS=Mus musculus OX=10090 GN=Cisd1 PE=1 SV=1	15	21	20	13	28	17	21	16	22	25	28	18	24	21	26	1.04124	0.802772	5	5	0	28	442	108
605	>sp|P56564|EAA1_MOUSE Excitatory amino acid transporter 1 OS=Mus musculus OX=10090 GN=Slc1a3 PE=1 SV=2	17	21	19	25	19	19	19	24	24	20	27	20	28	20	19	1.0495	0.590309	5	5	0	28	439	543
606	>sp|Q9JKR6|HYOU1_MOUSE Hypoxia up-regulated protein 1 OS=Mus musculus OX=10090 GN=Hyou1 PE=1 SV=1	20	19	16	18	18	21	17	20	23	21	17	19	21	18	24	1.12088	0.100032	5	5	0	28	399	999
607	>sp|E9Q3L2|PI4KA_MOUSE Phosphatidylinositol 4-kinase alpha OS=Mus musculus OX=10090 GN=Pi4ka PE=1 SV=2	18	24	14	28	25	9	18	19	27	13	17	17	28	20	23	0.788991	0.278852	5	5	0	28	394	2105
608	>sp|Q5SRX1-2|TM1L2_MOUSE Isoform 2 of TOM1-like protein 2 OS=Mus musculus OX=10090 GN=Tom1l2	23	20	28	23	21	15	23	25	15	20	26	NaN	20	20	23	0.852174	0.204581	5	5	0	28	392	487
609	>sp|Q9JME5|AP3B2_MOUSE AP-3 complex subunit beta-2 OS=Mus musculus OX=10090 GN=Ap3b2 PE=1 SV=2	16	25	17	22	28	16	11	20	24	16	20	15	20	21	23	0.805556	0.221185	5	5	0	28	377	1082
610	>sp|Q9R0Q6|ARC1A_MOUSE Actin-related protein 2/3 complex subunit 1A OS=Mus musculus OX=10090 GN=Arpc1a PE=1 SV=1	18	28	22	20	24	16	18	14	15	19	18	16	23	14	17	0.732143	0.015351	5	5	0	28	374	370
611	>sp|P26638|SYSC_MOUSE Serine--tRNA ligase, cytoplasmic OS=Mus musculus OX=10090 GN=Sars1 PE=1 SV=3	19	28	NaN	24	22	11	19	19	17	21	20	16	19	17	22	0.748387	0.0562121	4	5	0	28	363	512
612	>sp|O35136|NCAM2_MOUSE Neural cell adhesion molecule 2 OS=Mus musculus OX=10090 GN=Ncam2 PE=1 SV=1	11	19	16	19	28	19	21	17	22	11	16	24	15	12	15	0.967742	0.863726	5	5	0	28	362	837
613	>sp|Q9QXL2|KI21A_MOUSE Kinesin-like protein KIF21A OS=Mus musculus OX=10090 GN=Kif21a PE=1 SV=2	NaN	19	24	28	13	21	15	NaN	NaN	20	14	NaN	24	20	18	0.888889	0.597064	4	3	0	28	299	1672
614	>sp|Q3U1J4|DDB1_MOUSE DNA damage-binding protein 1 OS=Mus musculus OX=10090 GN=Ddb1 PE=1 SV=2	13	28	18	12	16	13	15	13	13	14	15	13	17	12	14	0.781609	0.224178	5	5	0	28	296	1140
615	>sp|Q9Z1S5|SEPT3_MOUSE Neuronal-specific septin-3 OS=Mus musculus OX=10090 GN=Septin3 PE=1 SV=2	23	28	NaN	NaN	NaN	NaN	NaN	NaN	NaN	NaN	NaN	NaN	NaN	18	NaN	#DIV/0!	#DIV/0!	2	0	0	28	86	350
616	>tr|A0A0R4J1E3|A0A0R4J1E3_MOUSE Drebrin OS=Mus musculus OX=10090 GN=Dbn1 PE=1 SV=1	NaN	1	NaN	28	NaN	NaN	25	2	NaN	NaN	NaN	1	NaN	NaN	NaN	0.931034	0.960159	2	2	0	28	59	661
617	>sp|Q99LC5|ETFA_MOUSE Electron transfer flavoprotein subunit alpha, mitochondrial OS=Mus musculus OX=10090 GN=Etfa PE=1 SV=2	22	21	22	21	25	20	17	22	22	23	27	19	21	23	17	0.936937	0.311571	5	5	0	27	442	333
618	>sp|Q9WV55|VAPA_MOUSE Vesicle-associated membrane protein-associated protein A OS=Mus musculus OX=10090 GN=Vapa PE=1 SV=2	22	27	21	22	21	12	21	21	16	20	14	18	19	26	17	0.79646	0.0587185	5	5	0	27	408	249
619	>sp|P70336|ROCK2_MOUSE Rho-associated protein kinase 2 OS=Mus musculus OX=10090 GN=Rock2 PE=1 SV=1	16	26	15	27	17	NaN	19	19	19	24	16	14	25	15	25	1.00248	0.987747	5	4	0	27	377	1388
620	>sp|Q9CQA3|SDHB_MOUSE Succinate dehydrogenase [ubiquinone] iron-sulfur subunit, mitochondrial OS=Mus musculus OX=10090 GN=Sdhb PE=1 SV=1	23	18	20	18	20	18	14	18	18	25	24	16	12	17	15	0.939394	0.56511	5	5	0	27	371	282
621	>sp|Q99PJ0|NTRI_MOUSE Neurotrimin OS=Mus musculus OX=10090 GN=Ntm PE=1 SV=2	20	23	13	15	18	19	25	27	16	NaN	25	27	17	25	16	1.22191	0.231725	5	4	0	27	368	344
622	>sp|P48774|GSTM5_MOUSE Glutathione S-transferase Mu 5 OS=Mus musculus OX=10090 GN=Gstm5 PE=1 SV=1	15	15	21	22	24	17	23	18	27	13	19	18	17	12	15	1.01031	0.949643	5	5	0	27	356	224
623	>sp|Q9CVB6|ARPC2_MOUSE Actin-related protein 2/3 complex subunit 2 OS=Mus musculus OX=10090 GN=Arpc2 PE=1 SV=3	17	24	15	17	21	16	19	16	24	13	27	14	14	20	16	0.93617	0.64009	5	5	0	27	355	300
624	>sp|P60487|PLPP_MOUSE Pyridoxal phosphate phosphatase OS=Mus musculus OX=10090 GN=Pdxp PE=1 SV=1	18	27	18	15	20	18	23	17	12	10	21	12	19	14	17	0.816327	0.273139	5	5	0	27	335	292
625	>sp|Q9D172|GAL3A_MOUSE Glutamine amidotransferase-like class 1 domain-containing protein 3A, mitochondrial OS=Mus musculus OX=10090 GN=Gatd3a PE=1 SV=1	17	16	19	22	27	10	17	10	16	18	13	15	19	13	17	0.70297	0.0528052	5	5	0	27	328	266
626	>sp|D3YZU1|SHAN1_MOUSE SH3 and multiple ankyrin repeat domains protein 1 OS=Mus musculus OX=10090 GN=Shank1 PE=1 SV=1	14	27	24	25	10	14	20	20	9	19	17	14	26	21	21	0.82	0.39384	5	5	0	27	324	2167
627	>tr|Q80UE4|Q80UE4_MOUSE Band 4.1-like protein 2 OS=Mus musculus OX=10090 GN=Epb41l2 PE=1 SV=1	17	NaN	20	14	14	14	11	13	27	18	15	12	21	18	NaN	1.02154	0.922206	4	5	0	27	307	794
628	>sp|P70349|HINT1_MOUSE Histidine triad nucleotide-binding protein 1 OS=Mus musculus OX=10090 GN=Hint1 PE=1 SV=3	10	14	21	7	27	10	9	14	10	11	8	15	10	11	12	0.683544	0.219398	5	5	0	27	280	126
629	>sp|Q8BFZ3|ACTBL_MOUSE Beta-actin-like protein 2 OS=Mus musculus OX=10090 GN=Actbl2 PE=1 SV=1	27	9	NaN	21	NaN	8	18	10	9	14	9	19	17	15	14	0.621053	0.167619	3	5	0	27	275	376
630	>sp|Q6NS52|DGKB_MOUSE Diacylglycerol kinase beta OS=Mus musculus OX=10090 GN=Dgkb PE=1 SV=2	18	20	18	15	NaN	NaN	10	15	12	15	9	15	17	17	11	0.732394	0.0250449	4	4	0	27	269	802
631	>tr|E9QNN1|E9QNN1_MOUSE ATP-dependent RNA helicase A OS=Mus musculus OX=10090 GN=Dhx9 PE=1 SV=1	NaN	22	25	26	NaN	8	23	NaN	20	NaN	16	15	24	NaN	NaN	0.69863	0.196558	3	3	0	27	268	1384
632	>sp|P63040|CPLX1_MOUSE Complexin-1 OS=Mus musculus OX=10090 GN=Cplx1 PE=1 SV=1	13	11	27	11	7	25	12	5	18	7	21	9	2	21	11	0.971014	0.938569	5	5	0	27	252	134
633	>tr|E9Q5W2|E9Q5W2_MOUSE Spermatogenesis-associated 31 subfamily D, member 1D OS=Mus musculus OX=10090 GN=Spata31d1d PE=4 SV=1	18	NaN	NaN	NaN	NaN	NaN	NaN	NaN	18	27	18	10	23	NaN	19	1.25	#DIV/0!	1	2	0	27	225	1247
634	>sp|Q923T9|KCC2G_MOUSE Calcium/calmodulin-dependent protein kinase type II subunit gamma OS=Mus musculus OX=10090 GN=Camk2g PE=1 SV=1	10	13	10	10	17	8	7	7	9	11	11	7	9	NaN	NaN	0.7	0.0508444	5	5	0	27	190	529
635	>sp|Q8CHH9|SEPT8_MOUSE Septin-8 OS=Mus musculus OX=10090 GN=Septin8 PE=1 SV=4	16	NaN	NaN	NaN	23	NaN	27	NaN	NaN	21	NaN	NaN	NaN	20	NaN	1.23077	0.431925	2	2	0	27	156	429
636	>tr|F2Z3U3|F2Z3U3_MOUSE Ras association (RalGDS/AF-6) and pleckstrin homology domains 1 OS=Mus musculus OX=10090 GN=Raph1 PE=1 SV=2	27	6	NaN	14	NaN	NaN	18	NaN	NaN	NaN	NaN	24	NaN	9	NaN	1.14894	#DIV/0!	3	1	0	27	139	1266
637	>sp|P47757-2|CAPZB_MOUSE Isoform 2 of F-actin-capping protein subunit beta OS=Mus musculus OX=10090 GN=Capzb	19	NaN	NaN	27	NaN	17	NaN	NaN	22	22	NaN	NaN	NaN	25	NaN	0.884058	0.520736	2	3	0	27	132	272
638	>sp|Q6Q477|AT2B4_MOUSE Plasma membrane calcium-transporting ATPase 4 OS=Mus musculus OX=10090 GN=Atp2b4 PE=1 SV=1	19	27	23	1	NaN	NaN	18	NaN	NaN	NaN	NaN	NaN	NaN	NaN	NaN	1.02857	#DIV/0!	4	1	0	27	108	1205
639	>tr|A2AWI7|A2AWI7_MOUSE Endophilin-B2 OS=Mus musculus OX=10090 GN=Sh3glb2 PE=1 SV=1	NaN	NaN	NaN	21	NaN	20	NaN	NaN	NaN	NaN	NaN	NaN	NaN	27	NaN	0.952381	#DIV/0!	1	1	0	27	68	404
640	>sp|Q8K596-2|NAC2_MOUSE Isoform 2 of Sodium/calcium exchanger 2 OS=Mus musculus OX=10090 GN=Slc8a2	NaN	NaN	NaN	NaN	27	NaN	NaN	NaN	NaN	NaN	NaN	NaN	NaN	NaN	NaN	#DIV/0!	#DIV/0!	1	0	0	27	27	915
641	>sp|Q8VD37-8|SGIP1_MOUSE Isoform 7 of SH3-containing GRB2-like protein 3-interacting protein 1 OS=Mus musculus OX=10090 GN=Sgip1	NaN	NaN	NaN	27	NaN	NaN	NaN	NaN	NaN	NaN	NaN	NaN	NaN	NaN	NaN	#DIV/0!	#DIV/0!	1	0	0	27	27	826
642	>sp|Q8VD37|SGIP1_MOUSE SH3-containing GRB2-like protein 3-interacting protein 1 OS=Mus musculus OX=10090 GN=Sgip1 PE=1 SV=1	NaN	NaN	NaN	NaN	NaN	NaN	NaN	27	NaN	NaN	NaN	NaN	NaN	NaN	NaN	#DIV/0!	#DIV/0!	0	1	0	27	27	806
643	>tr|H3BIV5|H3BIV5_MOUSE A-kinase anchor protein 5 OS=Mus musculus OX=10090 GN=Akap5 PE=1 SV=1	NaN	NaN	NaN	NaN	NaN	NaN	NaN	NaN	NaN	NaN	NaN	NaN	NaN	27	NaN	#DIV/0!	#DIV/0!	0	0	0	27	27	752
644	>tr|Q4VWZ5|Q4VWZ5_MOUSE Acyl-CoA-binding protein OS=Mus musculus OX=10090 GN=Dbi PE=1 SV=1	NaN	NaN	NaN	NaN	NaN	NaN	27	NaN	NaN	NaN	NaN	NaN	NaN	NaN	NaN	#DIV/0!	#DIV/0!	0	1	0	27	27	135
645	>tr|Q5SVG4|Q5SVG4_MOUSE AP complex subunit beta OS=Mus musculus OX=10090 GN=Ap1b1 PE=1 SV=1	NaN	NaN	NaN	NaN	27	NaN	NaN	NaN	NaN	NaN	NaN	NaN	NaN	NaN	NaN	#DIV/0!	#DIV/0!	1	0	0	27	27	923
646	>sp|P56135|ATPK_MOUSE ATP synthase subunit f, mitochondrial OS=Mus musculus OX=10090 GN=Atp5mf PE=1 SV=3	26	19	14	20	12	23	15	20	21	25	17	20	25	22	24	1.14286	0.408357	5	5	0	26	409	88
647	>tr|Q99N15|Q99N15_MOUSE 17beta-hydroxysteroid dehydrogenase type 10/short chain L-3-hydroxyacyl-CoA dehydrogenase OS=Mus musculus OX=10090 GN=Hsd17b10 PE=1 SV=1	18	21	22	24	21	15	21	21	25	NaN	25	22	22	NaN	21	0.966981	0.750726	5	4	0	26	393	261
648	>sp|Q9CR61|NDUB7_MOUSE NADH dehydrogenase [ubiquinone] 1 beta subcomplex subunit 7 OS=Mus musculus OX=10090 GN=Ndufb7 PE=1 SV=3	20	23	20	24	15	5	23	20	21	18	17	25	20	21	22	0.852941	0.424687	5	5	0	26	391	137
649	>sp|Q9Z2Y3|HOME1_MOUSE Homer protein homolog 1 OS=Mus musculus OX=10090 GN=Homer1 PE=1 SV=2	26	17	18	25	16	19	21	17	19	17	12	14	17	25	15	0.911765	0.444967	5	5	0	26	382	366
650	>sp|Q9WV34|MPP2_MOUSE MAGUK p55 subfamily member 2 OS=Mus musculus OX=10090 GN=Mpp2 PE=1 SV=1	19	21	16	23	26	20	14	17	15	18	18	14	22	18	22	0.8	0.070064	5	5	0	26	377	552
651	>sp|Q9JII6|AK1A1_MOUSE Aldo-keto reductase family 1 member A1 OS=Mus musculus OX=10090 GN=Akr1a1 PE=1 SV=3	17	24	19	13	26	23	20	17	23	15	18	14	18	18	17	0.989899	0.945701	5	5	0	26	376	325
652	>sp|Q05816|FABP5_MOUSE Fatty acid-binding protein 5 OS=Mus musculus OX=10090 GN=Fabp5 PE=1 SV=3	25	22	22	19	25	12	12	18	19	24	23	9	14	19	25	0.752212	0.058692	5	5	0	26	374	135
653	>sp|Q9JJK2|LANC2_MOUSE LanC-like protein 2 OS=Mus musculus OX=10090 GN=Lancl2 PE=1 SV=1	15	23	18	18	24	9	19	18	24	17	26	16	16	18	25	0.887755	0.477577	5	5	0	26	368	450
654	>sp|Q9CQD1|RAB5A_MOUSE Ras-related protein Rab-5A OS=Mus musculus OX=10090 GN=Rab5a PE=1 SV=1	13	15	18	15	17	10	24	24	26	18	13	18	20	17	21	1.30769	0.154527	5	5	0	26	362	215
655	>sp|Q8CGK3|LONM_MOUSE Lon protease homolog, mitochondrial OS=Mus musculus OX=10090 GN=Lonp1 PE=1 SV=2	17	20	14	18	21	9	14	13	23	21	16	11	24	14	24	0.888889	0.507205	5	5	0	26	348	949
656	>sp|Q9JI91|ACTN2_MOUSE Alpha-actinin-2 OS=Mus musculus OX=10090 GN=Actn2 PE=1 SV=2	16	19	20	14	17	14	11	17	20	17	13	17	19	17	18	0.918605	0.474459	5	5	0	26	348	894
657	>sp|Q91X97|NCALD_MOUSE Neurocalcin-delta OS=Mus musculus OX=10090 GN=Ncald PE=1 SV=4	14	19	15	21	15	6	16	11	22	17	26	11	16	14	21	0.857143	0.453968	5	5	0	26	333	193
658	>sp|Q9DCS9|NDUBA_MOUSE NADH dehydrogenase [ubiquinone] 1 beta subcomplex subunit 10 OS=Mus musculus OX=10090 GN=Ndufb10 PE=1 SV=3	14	14	11	17	14	25	13	20	12	15	15	16	26	14	15	1.21429	0.283185	5	5	0	26	330	176
659	>sp|Q9QYB5|ADDG_MOUSE Gamma-adducin OS=Mus musculus OX=10090 GN=Add3 PE=1 SV=2	17	26	14	15	13	16	12	14	16	15	16	17	15	18	16	0.858824	0.358147	5	5	0	26	322	706
660	>sp|O88685|PRS6A_MOUSE 26S proteasome regulatory subunit 6A OS=Mus musculus OX=10090 GN=Psmc3 PE=1 SV=2	18	18	19	15	NaN	16	18	25	NaN	15	22	18	15	14	NaN	1.05714	0.693239	4	4	0	26	300	442
661	>sp|Q08331|CALB2_MOUSE Calretinin OS=Mus musculus OX=10090 GN=Calb2 PE=1 SV=3	14	22	14	20	14	10	6	10	19	15	9	16	15	20	15	0.714286	0.130993	5	5	0	26	300	271
662	>tr|E9Q828|E9Q828_MOUSE Calcium-transporting ATPase OS=Mus musculus OX=10090 GN=Atp2b4 PE=1 SV=1	2	NaN	4	25	24	19	NaN	18	25	16	14	15	21	22	26	1.41818	0.411601	4	4	0	26	299	1172
663	>sp|Q8CGK7|GNAL_MOUSE Guanine nucleotide-binding protein G(olf) subunit alpha OS=Mus musculus OX=10090 GN=Gnal PE=1 SV=1	13	19	NaN	15	23	7	12	18	20	18	17	15	24	NaN	23	0.857143	0.48033	4	5	0	26	285	381
664	>sp|Q8VIJ6|SFPQ_MOUSE Splicing factor, proline- and glutamine-rich OS=Mus musculus OX=10090 GN=Sfpq PE=1 SV=1	11	15	16	26	7	12	8	17	16	15	12	14	9	14	14	0.906667	0.705348	5	5	0	26	271	699
665	>sp|Q9Z218|DPP6_MOUSE Dipeptidyl aminopeptidase-like protein 6 OS=Mus musculus OX=10090 GN=Dpp6 PE=1 SV=1	NaN	NaN	17	18	23	19	20	NaN	22	15	26	18	NaN	NaN	18	0.982759	0.891981	3	4	0	26	212	804
666	>sp|Q9DBF1-2|AL7A1_MOUSE Isoform 2 of Alpha-aminoadipic semialdehyde dehydrogenase OS=Mus musculus OX=10090 GN=Aldh7a1	NaN	NaN	13	NaN	15	NaN	NaN	8	22	20	26	NaN	16	NaN	16	1.19048	0.671411	2	3	0	26	209	511
667	>sp|Q8CA95|PDE10_MOUSE cAMP and cAMP-inhibited cGMP 3',5'-cyclic phosphodiesterase 10A OS=Mus musculus OX=10090 GN=Pde10a PE=1 SV=2	12	NaN	NaN	16	NaN	NaN	8	NaN	15	17	12	13	19	16	NaN	0.952381	0.87273	2	3	0	26	195	790
668	>tr|Q8VHM5|Q8VHM5_MOUSE Heterogeneous nuclear ribonucleoprotein R OS=Mus musculus OX=10090 GN=Hnrnpr PE=1 SV=1	NaN	26	NaN	15	11	NaN	NaN	7	23	NaN	8	13	20	22	NaN	0.865385	0.797151	3	2	0	26	187	632
669	>sp|Q9QZQ8-2|H2AY_MOUSE Isoform 1 of Core histone macro-H2A.1 OS=Mus musculus OX=10090 GN=Macroh2a1	17	NaN	20	NaN	26	NaN	NaN	NaN	NaN	NaN	NaN	NaN	NaN	NaN	15	#DIV/0!	#DIV/0!	3	0	0	26	116	369
670	>sp|P61089|UBE2N_MOUSE Ubiquitin-conjugating enzyme E2 N OS=Mus musculus OX=10090 GN=Ube2n PE=1 SV=1	17	17	24	18	21	17	18	23	23	19	25	14	13	18	22	1.03093	0.755296	5	5	0	25	381	152
671	>sp|O88844|IDHC_MOUSE Isocitrate dehydrogenase [NADP] cytoplasmic OS=Mus musculus OX=10090 GN=Idh1 PE=1 SV=2	24	18	15	15	17	20	22	17	20	17	22	17	16	17	25	1.07865	0.486329	5	5	0	25	374	414
672	>sp|O88712|CTBP1_MOUSE C-terminal-binding protein 1 OS=Mus musculus OX=10090 GN=Ctbp1 PE=1 SV=2	13	22	18	20	NaN	10	16	22	21	22	18	20	21	18	23	0.99726	0.987747	4	5	0	25	360	441
673	>sp|Q9WUB3|PYGM_MOUSE Glycogen phosphorylase, muscle form OS=Mus musculus OX=10090 GN=Pygm PE=1 SV=3	16	20	14	18	16	13	17	23	17	14	15	20	24	12	17	1	1	5	5	0	25	360	842
674	>sp|P14869|RLA0_MOUSE 60S acidic ribosomal protein P0 OS=Mus musculus OX=10090 GN=Rplp0 PE=1 SV=3	12	17	16	17	10	13	25	13	18	17	17	25	16	11	19	1.19444	0.31756	5	5	0	25	356	317
675	>sp|Q8BWT1|THIM_MOUSE 3-ketoacyl-CoA thiolase, mitochondrial OS=Mus musculus OX=10090 GN=Acaa2 PE=1 SV=3	16	16	20	25	18	14	12	22	17	20	13	19	15	19	20	0.894737	0.445055	5	5	0	25	356	397
676	>sp|P24549|AL1A1_MOUSE Retinal dehydrogenase 1 OS=Mus musculus OX=10090 GN=Aldh1a1 PE=1 SV=5	14	18	25	17	14	14	12	13	23	21	18	12	16	18	15	0.943182	0.749051	5	5	0	25	351	501
677	>sp|P49312|ROA1_MOUSE Heterogeneous nuclear ribonucleoprotein A1 OS=Mus musculus OX=10090 GN=Hnrnpa1 PE=1 SV=2	25	22	23	24	23	NaN	17	18	18	21	15	22	15	25	NaN	0.790598	0.00135583	5	4	0	25	339	320
678	>sp|Q62465|VAT1_MOUSE Synaptic vesicle membrane protein VAT-1 homolog OS=Mus musculus OX=10090 GN=Vat1 PE=1 SV=3	21	20	21	16	18	9	12	9	18	18	15	12	25	13	14	0.6875	0.0287132	5	5	0	25	319	406
679	>sp|Q9CPY7|AMPL_MOUSE Cytosol aminopeptidase OS=Mus musculus OX=10090 GN=Lap3 PE=1 SV=3	23	16	23	15	11	12	13	13	14	22	19	16	14	16	14	0.840909	0.375423	5	5	0	25	316	519
680	>sp|Q80XN0|BDH_MOUSE D-beta-hydroxybutyrate dehydrogenase, mitochondrial OS=Mus musculus OX=10090 GN=Bdh1 PE=1 SV=2	14	14	14	16	16	12	18	25	19	17	14	16	18	11	18	1.22973	0.150787	5	5	0	25	314	343
681	>sp|Q9CPV4|GLOD4_MOUSE Glyoxalase domain-containing protein 4 OS=Mus musculus OX=10090 GN=Glod4 PE=1 SV=1	25	16	9	NaN	25	10	9	18	17	15	20	19	16	15	17	0.736	0.254634	4	5	0	25	314	298
682	>sp|Q8R016|BLMH_MOUSE Bleomycin hydrolase OS=Mus musculus OX=10090 GN=Blmh PE=1 SV=1	13	11	10	17	20	13	9	11	17	12	12	11	13	19	16	0.873239	0.456805	5	5	0	25	291	455
683	>tr|A2ALL9|A2ALL9_MOUSE Calcium-transporting ATPase OS=Mus musculus OX=10090 GN=Atp2b3 PE=1 SV=1	NaN	20	23	19	22	16	15	16	21	13	NaN	11	11	22	14	0.771429	0.0254636	4	5	0	25	288	1173
684	>sp|P24527|LKHA4_MOUSE Leukotriene A-4 hydrolase OS=Mus musculus OX=10090 GN=Lta4h PE=1 SV=4	9	13	16	18	16	9	15	10	25	13	12	12	15	12	19	1	1	5	5	0	25	279	611
685	>sp|P70333|HNRH2_MOUSE Heterogeneous nuclear ribonucleoprotein H2 OS=Mus musculus OX=10090 GN=Hnrnph2 PE=1 SV=1	11	10	20	18	6	18	15	20	6	16	7	17	13	7	17	1.15385	0.588578	5	5	0	25	279	449
686	>sp|P47757|CAPZB_MOUSE F-actin-capping protein subunit beta OS=Mus musculus OX=10090 GN=Capzb PE=1 SV=3	NaN	22	20	NaN	23	NaN	18	12	NaN	NaN	13	9	21	NaN	25	0.692308	0.0765446	3	2	0	25	252	277
687	>sp|P05132|KAPCA_MOUSE cAMP-dependent protein kinase catalytic subunit alpha OS=Mus musculus OX=10090 GN=Prkaca PE=1 SV=3	16	16	20	3	18	16	6	3	10	3	6	6	18	17	19	0.520548	0.108521	5	5	0	25	240	351
688	>sp|P62137|PP1A_MOUSE Serine/threonine-protein phosphatase PP1-alpha catalytic subunit OS=Mus musculus OX=10090 GN=Ppp1ca PE=1 SV=1	18	25	16	19	7	4	7	21	8	16	13	6	17	7	9	0.658824	0.213763	5	5	0	25	237	330
689	>tr|A0A0A6YWG7|A0A0A6YWG7_MOUSE Rap guanine nucleotide exchange factor 2 OS=Mus musculus OX=10090 GN=Rapgef2 PE=1 SV=1	NaN	25	NaN	NaN	17	NaN	17	NaN	NaN	NaN	19	14	15	NaN	NaN	0.809524	#DIV/0!	2	1	0	25	131	1644
690	>tr|Q8C2Q7|Q8C2Q7_MOUSE Heterogeneous nuclear ribonucleoprotein H OS=Mus musculus OX=10090 GN=Hnrnph1 PE=1 SV=1	25	NaN	NaN	NaN	NaN	8	NaN	NaN	NaN	NaN	NaN	NaN	NaN	21	NaN	0.32	#DIV/0!	1	1	0	25	94	472
691	>sp|Q64514-2|TPP2_MOUSE Isoform Short of Tripeptidyl-peptidase 2 OS=Mus musculus OX=10090 GN=Tpp2	NaN	NaN	NaN	NaN	NaN	7	17	NaN	25	16	NaN	NaN	NaN	NaN	NaN	#DIV/0!	#DIV/0!	0	4	0	25	82	1249
692	>sp|P56383|AT5G2_MOUSE ATP synthase F(0) complex subunit C2, mitochondrial OS=Mus musculus OX=10090 GN=Atp5mc2 PE=1 SV=2	NaN	12	NaN	NaN	NaN	NaN	NaN	NaN	NaN	NaN	NaN	NaN	NaN	19	NaN	#DIV/0!	#DIV/0!	1	0	0	25	56	146
693	>tr|Q8C483|Q8C483_MOUSE Seryl-aminoacyl-tRNA synthetase OS=Mus musculus OX=10090 GN=Sars PE=1 SV=1	NaN	NaN	21	NaN	NaN	NaN	NaN	NaN	NaN	NaN	NaN	NaN	NaN	NaN	NaN	#DIV/0!	#DIV/0!	1	0	0	25	46	536
694	>sp|P11881-6|ITPR1_MOUSE Isoform 6 of Inositol 1,4,5-trisphosphate receptor type 1 OS=Mus musculus OX=10090 GN=Itpr1	NaN	NaN	NaN	NaN	NaN	NaN	NaN	NaN	25	NaN	NaN	NaN	NaN	NaN	NaN	#DIV/0!	#DIV/0!	0	1	0	25	25	2717
695	>sp|Q9DA69|IFT43_MOUSE Intraflagellar transport protein 43 homolog OS=Mus musculus OX=10090 GN=Ift43 PE=1 SV=2	NaN	NaN	NaN	25	NaN	NaN	NaN	NaN	NaN	NaN	NaN	NaN	NaN	NaN	NaN	#DIV/0!	#DIV/0!	1	0	0	25	25	206
696	>tr|E9QN47|E9QN47_MOUSE MAP kinase-activating death domain protein OS=Mus musculus OX=10090 GN=Madd PE=1 SV=2	NaN	NaN	NaN	NaN	NaN	NaN	NaN	NaN	NaN	NaN	NaN	NaN	NaN	NaN	25	#DIV/0!	#DIV/0!	0	0	0	25	25	1627
697	>tr|F2Z4B7|F2Z4B7_MOUSE Ras association (RalGDS/AF-6) and pleckstrin homology domains 1 OS=Mus musculus OX=10090 GN=Raph1 PE=1 SV=1	NaN	NaN	NaN	NaN	NaN	NaN	NaN	NaN	NaN	NaN	25	NaN	NaN	NaN	NaN	#DIV/0!	#DIV/0!	0	0	0	25	25	645
698	>sp|Q921M7|CYRIB_MOUSE CYFIP-related Rac1 interactor B OS=Mus musculus OX=10090 GN=Cyrib PE=1 SV=1	22	14	21	22	20	15	16	23	21	22	24	18	17	16	21	0.979798	0.861096	5	5	0	24	391	324
699	>sp|Q9CR95|NECP1_MOUSE Adaptin ear-binding coat-associated protein 1 OS=Mus musculus OX=10090 GN=Necap1 PE=1 SV=2	23	23	18	21	17	22	19	20	17	17	15	19	16	24	17	0.931373	0.398121	5	5	0	24	387	275
700	>sp|Q9EQ20|MMSA_MOUSE Methylmalonate-semialdehyde dehydrogenase [acylating], mitochondrial OS=Mus musculus OX=10090 GN=Aldh6a1 PE=1 SV=1	17	21	23	21	17	15	13	22	20	15	15	23	20	23	19	0.858586	0.215803	5	5	0	24	385	535
701	>sp|O54774|AP3D1_MOUSE AP-3 complex subunit delta-1 OS=Mus musculus OX=10090 GN=Ap3d1 PE=1 SV=1	21	24	15	21	19	12	17	19	23	17	18	22	19	19	18	0.88	0.330218	5	5	0	24	378	1199
702	>sp|Q60668|HNRPD_MOUSE Heterogeneous nuclear ribonucleoprotein D0 OS=Mus musculus OX=10090 GN=Hnrnpd PE=1 SV=2	14	23	18	19	23	9	19	15	17	19	13	24	19	22	19	0.814433	0.189404	5	5	0	24	377	355
703	>sp|P26040|EZRI_MOUSE Ezrin OS=Mus musculus OX=10090 GN=Ezr PE=1 SV=3	17	24	21	18	19	16	12	18	19	21	19	19	20	18	24	0.868687	0.223369	5	5	0	24	367	586
704	>sp|B9EKR1|PTPRZ_MOUSE Receptor-type tyrosine-protein phosphatase zeta OS=Mus musculus OX=10090 GN=Ptprz1 PE=1 SV=1	20	15	20	20	18	24	15	16	20	14	15	20	20	22	12	0.956989	0.712847	5	5	0	24	364	2312
705	>sp|Q9JMH9|MY18A_MOUSE Unconventional myosin-XVIIIa OS=Mus musculus OX=10090 GN=Myo18a PE=1 SV=2	18	23	24	19	17	10	14	22	16	17	16	19	24	NaN	21	0.782178	0.104612	5	5	0	24	364	2050
706	>sp|Q5M8N0|CNRP1_MOUSE CB1 cannabinoid receptor-interacting protein 1 OS=Mus musculus OX=10090 GN=Cnrip1 PE=1 SV=1	16	17	18	20	19	13	14	16	18	21	18	22	20	18	14	0.911111	0.346594	5	5	0	24	358	164
707	>sp|Q9D0E1|HNRPM_MOUSE Heterogeneous nuclear ribonucleoprotein M OS=Mus musculus OX=10090 GN=Hnrnpm PE=1 SV=3	19	20	20	15	19	15	20	18	13	18	20	18	17	18	13	0.903226	0.278767	5	5	0	24	357	729
708	>sp|P43024|CX6A1_MOUSE Cytochrome c oxidase subunit 6A1, mitochondrial OS=Mus musculus OX=10090 GN=Cox6a1 PE=1 SV=2	16	24	18	21	21	7	13	16	21	20	19	14	16	14	23	0.77	0.150287	5	5	0	24	342	111
709	>sp|Q9CPP6|NDUA5_MOUSE NADH dehydrogenase [ubiquinone] 1 alpha subcomplex subunit 5 OS=Mus musculus OX=10090 GN=Ndufa5 PE=1 SV=3	20	14	12	18	17	12	11	19	24	17	11	16	24	21	21	1.02469	0.888947	5	5	0	24	333	116
710	>sp|Q6ZPE2|MTMR5_MOUSE Myotubularin-related protein 5 OS=Mus musculus OX=10090 GN=Sbf1 PE=1 SV=2	15	22	18	12	15	10	20	16	24	17	NaN	22	23	11	15	1.06098	0.736249	5	5	0	24	323	1867
711	>sp|Q9Z140|CPNE6_MOUSE Copine-6 OS=Mus musculus OX=10090 GN=Cpne6 PE=1 SV=1	23	22	16	21	18	12	17	10	24	20	19	13	13	18	14	0.83	0.270767	5	5	0	24	323	557
712	>sp|Q8BLF1|NCEH1_MOUSE Neutral cholesterol ester hydrolase 1 OS=Mus musculus OX=10090 GN=Nceh1 PE=1 SV=1	12	18	12	12	11	6	14	17	14	15	19	16	16	16	24	1.01538	0.931873	5	5	0	24	293	408
713	>sp|Q9JM76|ARPC3_MOUSE Actin-related protein 2/3 complex subunit 3 OS=Mus musculus OX=10090 GN=Arpc3 PE=1 SV=3	9	17	11	14	14	10	7	12	14	16	18	17	10	11	18	0.907692	0.580442	5	5	0	24	260	178
714	>sp|Q9CQW2|ARL8B_MOUSE ADP-ribosylation factor-like protein 8B OS=Mus musculus OX=10090 GN=Arl8b PE=1 SV=1	10	4	8	2	19	5	6	16	5	4	19	5	11	5	22	0.837209	0.715091	5	5	0	24	230	186
715	>sp|P21278|GNA11_MOUSE Guanine nucleotide-binding protein subunit alpha-11 OS=Mus musculus OX=10090 GN=Gna11 PE=1 SV=1	9	12	9	12	19	3	24	12	12	9	13	7	12	15	12	0.983607	0.960135	5	5	0	24	214	359
716	>sp|P97379|G3BP2_MOUSE Ras GTPase-activating protein-binding protein 2 OS=Mus musculus OX=10090 GN=G3bp2 PE=1 SV=2	9	9	6	24	9	12	7	NaN	4	10	11	4	10	9	5	0.723684	0.450702	5	4	0	24	176	482
717	>sp|Q5DU25|IQEC2_MOUSE IQ motif and SEC7 domain-containing protein 2 OS=Mus musculus OX=10090 GN=Iqsec2 PE=1 SV=3	8	24	12	20	13	5	10	5	NaN	5	3	13	NaN	17	4	0.405844	0.0331113	5	4	0	24	152	1478
718	>sp|O08532|CA2D1_MOUSE Voltage-dependent calcium channel subunit alpha-2/delta-1 OS=Mus musculus OX=10090 GN=Cacna2d1 PE=1 SV=1	NaN	NaN	NaN	NaN	NaN	NaN	NaN	NaN	NaN	NaN	NaN	NaN	21	NaN	NaN	#DIV/0!	#DIV/0!	0	0	0	24	45	1103
719	>sp|Q5SRX1|TM1L2_MOUSE TOM1-like protein 2 OS=Mus musculus OX=10090 GN=Tom1l2 PE=1 SV=1	NaN	NaN	NaN	NaN	NaN	NaN	NaN	NaN	NaN	NaN	NaN	24	NaN	NaN	NaN	#DIV/0!	#DIV/0!	0	0	0	24	44	507
720	>tr|A0A571BE69|A0A571BE69_MOUSE Neuronal-specific septin-3 OS=Mus musculus OX=10090 GN=Septin3 PE=1 SV=1	NaN	NaN	NaN	NaN	NaN	13	NaN	NaN	NaN	NaN	NaN	NaN	NaN	NaN	NaN	#DIV/0!	#DIV/0!	0	1	0	24	37	822
721	>sp|Q6P1F6|2ABA_MOUSE Serine/threonine-protein phosphatase 2A 55 kDa regulatory subunit B alpha isoform OS=Mus musculus OX=10090 GN=Ppp2r2a PE=1 SV=1	18	18	19	20	18	16	17	22	23	12	13	14	21	14	23	0.967742	0.778674	5	5	0	23	363	447
722	>sp|Q7TMF3|NDUAC_MOUSE NADH dehydrogenase [ubiquinone] 1 alpha subcomplex subunit 12 OS=Mus musculus OX=10090 GN=Ndufa12 PE=1 SV=2	20	15	21	20	18	21	14	13	23	17	12	16	13	19	23	0.93617	0.602515	5	5	0	23	359	145
723	>sp|Q8K0S0|PHYIP_MOUSE Phytanoyl-CoA hydroxylase-interacting protein OS=Mus musculus OX=10090 GN=Phyhip PE=1 SV=1	18	19	15	20	21	12	5	18	23	22	19	18	17	10	17	0.860215	0.480712	5	5	0	23	338	330
724	>sp|P20108|PRDX3_MOUSE Thioredoxin-dependent peroxide reductase, mitochondrial OS=Mus musculus OX=10090 GN=Prdx3 PE=1 SV=1	17	15	19	13	22	15	14	16	19	16	16	19	14	15	20	0.930233	0.51738	5	5	0	23	337	257
725	>sp|O09061|PSB1_MOUSE Proteasome subunit beta type-1 OS=Mus musculus OX=10090 GN=Psmb1 PE=1 SV=1	12	17	14	12	16	11	19	16	21	16	23	16	18	14	18	1.16901	0.258902	5	5	0	23	328	240
726	>sp|Q8R5H6|WASF1_MOUSE Wiskott-Aldrich syndrome protein family member 1 OS=Mus musculus OX=10090 GN=Wasf1 PE=1 SV=2	14	21	10	14	15	13	16	20	11	17	12	17	23	16	18	1.04054	0.80624	5	5	0	23	325	559
727	>sp|P54775|PRS6B_MOUSE 26S proteasome regulatory subunit 6B OS=Mus musculus OX=10090 GN=Psmc4 PE=1 SV=2	14	16	16	16	17	16	14	21	15	18	17	9	14	13	15	1.06329	0.474998	5	5	0	23	316	418
728	>sp|Q64727|VINC_MOUSE Vinculin OS=Mus musculus OX=10090 GN=Vcl PE=1 SV=4	12	16	12	22	19	15	12	13	12	19	11	15	18	17	23	0.876543	0.421784	5	5	0	23	313	1066
729	>sp|Q8BUV3|GEPH_MOUSE Gephyrin OS=Mus musculus OX=10090 GN=Gphn PE=1 SV=2	9	22	18	17	20	14	15	10	21	17	7	10	18	13	23	0.895349	0.547142	5	5	0	23	298	769
730	>sp|Q62048|PEA15_MOUSE Astrocytic phosphoprotein PEA-15 OS=Mus musculus OX=10090 GN=Pea15 PE=1 SV=1	15	15	18	19	10	13	15	14	15	13	21	23	12	18	14	0.909091	0.415651	5	5	0	23	297	130
731	>sp|P63242|IF5A1_MOUSE Eukaryotic translation initiation factor 5A-1 OS=Mus musculus OX=10090 GN=Eif5a PE=1 SV=2	11	15	12	16	17	23	18	11	16	17	13	13	14	13	19	1.19718	0.247591	5	5	0	23	293	154
732	>sp|Q8BHN3|GANAB_MOUSE Neutral alpha-glucosidase AB OS=Mus musculus OX=10090 GN=Ganab PE=1 SV=1	9	NaN	16	18	20	9	NaN	16	19	16	NaN	12	19	15	20	0.952381	0.822395	4	4	0	23	287	944
733	>sp|Q9JKD3|SCAM5_MOUSE Secretory carrier-associated membrane protein 5 OS=Mus musculus OX=10090 GN=Scamp5 PE=1 SV=1	19	21	12	15	12	10	11	9	18	12	23	12	9	20	14	0.759494	0.15449	5	5	0	23	279	235
734	>sp|Q6ZPJ3|UBE2O_MOUSE (E3-independent) E2 ubiquitin-conjugating enzyme UBE2O OS=Mus musculus OX=10090 GN=Ube2o PE=1 SV=3	13	18	17	13	13	11	12	13	13	15	10	18	13	23	14	0.864865	0.161397	5	5	0	23	278	1288
735	>sp|Q60829|PPR1B_MOUSE Protein phosphatase 1 regulatory subunit 1B OS=Mus musculus OX=10090 GN=Ppp1r1b PE=1 SV=2	16	13	14	9	11	14	10	14	12	15	11	23	12	21	6	1.03175	0.79691	5	5	0	23	275	194
736	>tr|D3Z3B8|D3Z3B8_MOUSE Disks large homolog 1 OS=Mus musculus OX=10090 GN=Dlg1 PE=1 SV=1	23	20	1	NaN	18	15	NaN	12	21	17	12	16	14	15	16	1.04839	0.891887	4	4	0	23	266	834
737	>sp|Q99JI6|RAP1B_MOUSE Ras-related protein Rap-1b OS=Mus musculus OX=10090 GN=Rap1b PE=1 SV=2	6	5	8	18	20	12	18	11	23	19	14	16	15	15	15	1.45614	0.216516	5	5	0	23	264	184
738	>sp|A2AGT5|CKAP5_MOUSE Cytoskeleton-associated protein 5 OS=Mus musculus OX=10090 GN=Ckap5 PE=1 SV=1	14	NaN	19	17	17	11	12	20	11	15	13	NaN	16	17	14	0.823881	0.211378	4	5	0	23	260	2032
739	>sp|Q3ULJ0|GPD1L_MOUSE Glycerol-3-phosphate dehydrogenase 1-like protein OS=Mus musculus OX=10090 GN=Gpd1l PE=1 SV=2	11	23	13	13	15	9	7	9	15	13	14	14	11	14	15	0.706667	0.124138	5	5	0	23	260	351
740	>sp|Q64514|TPP2_MOUSE Tripeptidyl-peptidase 2 OS=Mus musculus OX=10090 GN=Tpp2 PE=1 SV=3	11	21	16	23	17	NaN	NaN	23	NaN	NaN	17	14	17	21	21	1.30682	#DIV/0!	5	1	0	23	259	1262
741	>sp|Q61656|DDX5_MOUSE Probable ATP-dependent RNA helicase DDX5 OS=Mus musculus OX=10090 GN=Ddx5 PE=1 SV=2	18	NaN	NaN	NaN	13	12	16	NaN	23	16	21	20	16	22	15	1.08065	0.756011	2	4	0	23	241	614
742	>sp|Q9CZY3|UB2V1_MOUSE Ubiquitin-conjugating enzyme E2 variant 1 OS=Mus musculus OX=10090 GN=Ube2v1 PE=1 SV=1	19	9	12	13	3	11	12	19	15	14	NaN	NaN	2	14	10	1.26786	0.340961	5	5	0	23	221	147
743	>sp|Q922H2|PDK3_MOUSE [Pyruvate dehydrogenase (acetyl-transferring)] kinase isozyme 3, mitochondrial OS=Mus musculus OX=10090 GN=Pdk3 PE=1 SV=1	15	23	5	20	15	6	3	8	15	15	16	2	8	NaN	19	0.602564	0.150674	5	5	0	23	213	415
744	>sp|Q60875|ARHG2_MOUSE Rho guanine nucleotide exchange factor 2 OS=Mus musculus OX=10090 GN=Arhgef2 PE=1 SV=4	NaN	NaN	16	19	NaN	NaN	18	21	15	NaN	NaN	12	NaN	20	19	1.02857	0.85427	2	3	0	23	211	985
745	>sp|O35737|HNRH1_MOUSE Heterogeneous nuclear ribonucleoprotein H OS=Mus musculus OX=10090 GN=Hnrnph1 PE=1 SV=3	NaN	23	6	14	17	NaN	10	7	15	12	17	9	20	NaN	14	0.733333	0.346422	4	4	0	23	193	449
746	>sp|P68181|KAPCB_MOUSE cAMP-dependent protein kinase catalytic subunit beta OS=Mus musculus OX=10090 GN=Prkacb PE=1 SV=2	4	9	12	NaN	NaN	7	17	23	NaN	17	16	NaN	8	NaN	NaN	1.92	0.140674	3	4	0	23	126	351
747	>tr|E9PYH0|E9PYH0_MOUSE Versican core protein OS=Mus musculus OX=10090 GN=Vcan PE=1 SV=1	15	NaN	NaN	NaN	23	21	14	NaN	NaN	NaN	NaN	NaN	16	NaN	NaN	0.921053	0.804302	2	2	0	23	102	3354
748	>tr|Q66L47|Q66L47_MOUSE Guanine nucleotide binding protein, alpha stimulating, olfactory type OS=Mus musculus OX=10090 GN=Gnal PE=1 SV=1	NaN	NaN	14	NaN	NaN	NaN	NaN	NaN	NaN	NaN	NaN	NaN	NaN	19	NaN	#DIV/0!	#DIV/0!	1	0	0	23	68	448
749	>tr|V9GXM1|V9GXM1_MOUSE ADP-ribosylation factor GTPase-activating protein 1 OS=Mus musculus OX=10090 GN=Arfgap1 PE=1 SV=1	NaN	NaN	NaN	NaN	NaN	11	NaN	NaN	NaN	NaN	NaN	NaN	NaN	NaN	16	#DIV/0!	#DIV/0!	0	1	0	23	50	424
750	>sp|P12023-3|A4_MOUSE Isoform APP751 of Amyloid-beta A4 protein OS=Mus musculus OX=10090 GN=App	NaN	NaN	NaN	NaN	NaN	23	NaN	NaN	NaN	NaN	NaN	16	NaN	NaN	NaN	#DIV/0!	#DIV/0!	0	1	0	23	39	735
751	>sp|Q80Z38-3|SHAN2_MOUSE Isoform 3 of SH3 and multiple ankyrin repeat domains protein 2 OS=Mus musculus OX=10090 GN=Shank2	23	NaN	NaN	NaN	NaN	NaN	NaN	NaN	12	NaN	NaN	NaN	NaN	NaN	NaN	0.521739	#DIV/0!	1	1	0	23	35	1262
752	>sp|O35098-2|DPYL4_MOUSE Isoform 2 of Dihydropyrimidinase-related protein 4 OS=Mus musculus OX=10090 GN=Dpysl4	23	NaN	NaN	NaN	NaN	NaN	NaN	NaN	NaN	NaN	NaN	NaN	NaN	NaN	NaN	#DIV/0!	#DIV/0!	1	0	0	23	23	593
753	>tr|A2AFG7|A2AFG7_MOUSE Neural cell adhesion molecule L1 OS=Mus musculus OX=10090 GN=L1cam PE=1 SV=1	NaN	NaN	NaN	NaN	NaN	NaN	NaN	NaN	NaN	NaN	23	NaN	NaN	NaN	NaN	#DIV/0!	#DIV/0!	0	0	0	23	23	1250
754	>tr|A2CEK3|A2CEK3_MOUSE Phosphoglucomutase-1 OS=Mus musculus OX=10090 GN=Pgm1 PE=1 SV=1	NaN	NaN	NaN	NaN	NaN	NaN	NaN	NaN	NaN	NaN	NaN	23	NaN	NaN	NaN	#DIV/0!	#DIV/0!	0	0	0	23	23	580
755	>tr|Q80VM5|Q80VM5_MOUSE Dipeptidyl aminopeptidase-like protein 6 OS=Mus musculus OX=10090 GN=Dpp6 PE=1 SV=1	NaN	NaN	NaN	NaN	NaN	NaN	NaN	23	NaN	NaN	NaN	NaN	NaN	NaN	NaN	#DIV/0!	#DIV/0!	0	1	0	23	23	803
756	>tr|Q8BSH9|Q8BSH9_MOUSE Nucleosome assembly protein 1-like 1 OS=Mus musculus OX=10090 GN=Nap1l1 PE=1 SV=1	NaN	NaN	NaN	NaN	NaN	NaN	NaN	NaN	NaN	NaN	23	NaN	NaN	NaN	NaN	#DIV/0!	#DIV/0!	0	0	0	23	23	383
757	>sp|Q9JIA1|LGI1_MOUSE Leucine-rich glioma-inactivated protein 1 OS=Mus musculus OX=10090 GN=Lgi1 PE=1 SV=1	21	21	16	21	22	14	16	14	19	15	17	13	19	16	21	0.772277	0.011654	5	5	0	22	359	557
758	>sp|Q8BKZ9|ODPX_MOUSE Pyruvate dehydrogenase protein X component, mitochondrial OS=Mus musculus OX=10090 GN=Pdhx PE=1 SV=1	15	18	16	17	20	22	20	15	17	22	8	13	14	21	9	1.11628	0.256599	5	5	0	22	334	501
759	>sp|P29758|OAT_MOUSE Ornithine aminotransferase, mitochondrial OS=Mus musculus OX=10090 GN=Oat PE=1 SV=1	15	17	11	15	15	13	12	20	18	14	15	21	17	22	13	1.05479	0.672237	5	5	0	22	333	439
760	>sp|P15116|CADH2_MOUSE Cadherin-2 OS=Mus musculus OX=10090 GN=Cdh2 PE=1 SV=2	20	16	14	11	15	18	15	16	13	13	19	13	12	13	18	0.986842	0.911503	5	5	0	22	315	906
761	>sp|Q9CWJ9|PUR9_MOUSE Bifunctional purine biosynthesis protein ATIC OS=Mus musculus OX=10090 GN=Atic PE=1 SV=2	13	17	14	21	16	14	16	17	15	11	15	18	14	22	16	0.901235	0.382628	5	5	0	22	315	592
762	>sp|Q8VDM4|PSMD2_MOUSE 26S proteasome non-ATPase regulatory subunit 2 OS=Mus musculus OX=10090 GN=Psmd2 PE=1 SV=1	17	20	14	18	15	7	16	13	22	14	17	13	17	15	17	0.857143	0.390851	5	5	0	22	314	908
763	>sp|Q8BGH2|SAM50_MOUSE Sorting and assembly machinery component 50 homolog OS=Mus musculus OX=10090 GN=Samm50 PE=1 SV=1	12	18	15	15	12	15	15	14	21	17	16	14	15	12	18	1.13889	0.267796	5	5	0	22	303	469
764	>sp|Q8BKC5|IPO5_MOUSE Importin-5 OS=Mus musculus OX=10090 GN=Ipo5 PE=1 SV=3	9	18	9	18	12	5	14	22	22	14	18	11	16	15	19	1.16667	0.574105	5	5	0	22	302	1097
765	>sp|P46638|RB11B_MOUSE Ras-related protein Rab-11B OS=Mus musculus OX=10090 GN=Rab11b PE=1 SV=3	13	14	11	18	18	17	18	13	19	13	18	11	10	19	19	1.08108	0.541429	5	5	0	22	301	218
766	>sp|Q9QVP9|FAK2_MOUSE Protein-tyrosine kinase 2-beta OS=Mus musculus OX=10090 GN=Ptk2b PE=1 SV=2	12	18	12	16	16	9	19	18	19	17	11	11	19	22	21	1.10811	0.494626	5	5	0	22	300	1009
767	>sp|Q91Z31|PTBP2_MOUSE Polypyrimidine tract-binding protein 2 OS=Mus musculus OX=10090 GN=Ptbp2 PE=1 SV=2	10	15	15	13	16	13	9	16	17	16	11	13	22	20	17	1.02899	0.830732	5	5	0	22	296	531
768	>sp|Q9CPU0|LGUL_MOUSE Lactoylglutathione lyase OS=Mus musculus OX=10090 GN=Glo1 PE=1 SV=3	20	19	15	18	11	16	17	13	22	13	15	14	8	14	14	0.975904	0.867608	5	5	0	22	296	184
769	>sp|Q8BIJ6|SYIM_MOUSE Isoleucine--tRNA ligase, mitochondrial OS=Mus musculus OX=10090 GN=Iars2 PE=1 SV=1	18	17	15	16	22	5	10	10	22	14	13	10	22	16	18	0.693182	0.117875	5	5	0	22	294	1012
770	>sp|Q8R5M8-4|CADM1_MOUSE Isoform 4 of Cell adhesion molecule 1 OS=Mus musculus OX=10090 GN=Cadm1	14	17	17	17	21	17	10	13	15	17	18	NaN	19	20	20	0.837209	0.144631	5	5	0	22	294	417
771	>sp|Q6P9K8|CSKI1_MOUSE Caskin-1 OS=Mus musculus OX=10090 GN=Caskin1 PE=1 SV=2	17	13	16	19	12	19	11	17	7	13	11	13	18	22	13	0.87013	0.44576	5	5	0	22	291	1431
772	>sp|O08917|FLOT1_MOUSE Flotillin-1 OS=Mus musculus OX=10090 GN=Flot1 PE=1 SV=1	15	18	12	14	21	16	9	15	13	16	12	11	13	22	15	0.8625	0.316509	5	5	0	22	283	428
773	>sp|P34914|HYES_MOUSE Bifunctional epoxide hydrolase 2 OS=Mus musculus OX=10090 GN=Ephx2 PE=1 SV=2	12	11	16	13	17	7	12	22	8	12	16	14	17	15	12	0.884058	0.595563	5	5	0	22	276	554
774	>sp|P26039|TLN1_MOUSE Talin-1 OS=Mus musculus OX=10090 GN=Tln1 PE=1 SV=2	17	19	12	22	11	7	9	15	11	19	11	13	22	14	15	0.753086	0.218674	5	5	0	22	273	2541
775	>sp|P35803|GPM6B_MOUSE Neuronal membrane glycoprotein M6-b OS=Mus musculus OX=10090 GN=Gpm6b PE=1 SV=2	19	NaN	13	14	14	6	16	12	14	11	9	12	19	14	12	0.786667	0.198081	4	5	0	22	264	328
776	>sp|O35927|CTND2_MOUSE Catenin delta-2 OS=Mus musculus OX=10090 GN=Ctnnd2 PE=1 SV=1	17	18	18	NaN	NaN	7	13	9	22	12	10	9	20	18	16	0.713208	0.192273	3	5	0	22	263	1247
777	>tr|E9PUA3|E9PUA3_MOUSE IQ motif and SEC7 domain-containing protein 1 OS=Mus musculus OX=10090 GN=Iqsec1 PE=1 SV=1	14	21	20	16	14	NaN	17	NaN	18	15	9	NaN	22	17	17	0.980392	0.877932	5	3	0	22	258	1099
778	>sp|Q8K3H0|DP13A_MOUSE DCC-interacting protein 13-alpha OS=Mus musculus OX=10090 GN=Appl1 PE=1 SV=1	8	16	12	9	13	6	11	15	15	18	11	8	12	14	22	1.12069	0.59398	5	5	0	22	253	707
779	>sp|Q8BIG7|CMTD1_MOUSE Catechol O-methyltransferase domain-containing protein 1 OS=Mus musculus OX=10090 GN=Comtd1 PE=1 SV=1	13	15	6	11	13	4	17	8	20	17	18	5	10	11	22	1.13793	0.652431	5	5	0	22	252	262
780	>sp|Q8BRT1|CLAP2_MOUSE CLIP-associating protein 2 OS=Mus musculus OX=10090 GN=Clasp2 PE=1 SV=1	NaN	15	NaN	20	18	NaN	18	NaN	19	17	12	13	12	11	22	1.01887	0.841596	3	3	0	22	247	1286
781	>sp|Q9QZQ8|H2AY_MOUSE Core histone macro-H2A.1 OS=Mus musculus OX=10090 GN=Macroh2a1 PE=1 SV=3	NaN	15	NaN	15	NaN	15	17	21	13	8	15	20	20	14	NaN	0.986667	0.957899	2	5	0	22	233	372
782	>sp|P63216|GBG3_MOUSE Guanine nucleotide-binding protein G(I)/G(S)/G(O) subunit gamma-3 OS=Mus musculus OX=10090 GN=Gng3 PE=1 SV=1	8	7	8	3	22	5	9	16	11	8	20	11	12	8	11	1.02083	0.958384	5	5	0	22	216	75
783	>sp|Q8BNW9|KBTBB_MOUSE Kelch repeat and BTB domain-containing protein 11 OS=Mus musculus OX=10090 GN=Kbtbd11 PE=1 SV=3	11	22	8	8	12	3	14	9	13	8	8	6	10	15	16	0.770492	0.412691	5	5	0	22	210	633
784	>sp|Q80U28|MADD_MOUSE MAP kinase-activating death domain protein OS=Mus musculus OX=10090 GN=Madd PE=1 SV=2	7	22	17	20	14	11	NaN	9	NaN	16	14	NaN	18	19	NaN	0.75	0.335158	5	3	0	22	208	1577
785	>sp|P20917|MAG_MOUSE Myelin-associated glycoprotein OS=Mus musculus OX=10090 GN=Mag PE=1 SV=3	14	16	10	12	11	7	14	NaN	17	NaN	10	12	10	12	16	1.00529	0.980351	5	3	0	22	199	627
786	>sp|Q9CPW0|CNTP2_MOUSE Contactin-associated protein-like 2 OS=Mus musculus OX=10090 GN=Cntnap2 PE=1 SV=2	13	10	NaN	14	16	8	6	9	6	NaN	4	NaN	NaN	8	22	0.54717	0.00624442	4	4	0	22	161	1332
787	>sp|P60766-1|CDC42_MOUSE Isoform 1 of Cell division control protein 42 homolog OS=Mus musculus OX=10090 GN=Cdc42	9	5	10	4	2	4	7	10	5	4	19	7	10	4	4	1	1	5	5	0	22	137	191
788	>sp|P62835|RAP1A_MOUSE Ras-related protein Rap-1A OS=Mus musculus OX=10090 GN=Rap1a PE=1 SV=1	16	22	15	5	2	1	NaN	3	4	6	5	1	4	4	5	0.291667	0.0883267	5	4	0	22	135	184
789	>sp|P68181-4|KAPCB_MOUSE Isoform 4 of cAMP-dependent protein kinase catalytic subunit beta OS=Mus musculus OX=10090 GN=Prkacb	NaN	NaN	NaN	21	7	NaN	NaN	NaN	21	NaN	NaN	22	NaN	6	6	1.5	#DIV/0!	2	1	0	22	135	398
790	>sp|P58022|LOXL2_MOUSE Lysyl oxidase homolog 2 OS=Mus musculus OX=10090 GN=Loxl2 PE=1 SV=2	NaN	NaN	10	NaN	NaN	NaN	NaN	NaN	NaN	22	11	NaN	NaN	NaN	NaN	2.2	#DIV/0!	1	1	0	22	52	776
791	>tr|Q5EBP8|Q5EBP8_MOUSE Heterogeneous nuclear ribonucleoprotein A1 OS=Mus musculus OX=10090 GN=Hnrnpa1 PE=1 SV=1	NaN	NaN	NaN	NaN	NaN	12	NaN	NaN	NaN	NaN	NaN	NaN	1	NaN	22	#DIV/0!	#DIV/0!	0	1	0	22	49	373
792	>sp|Q8R3V5-3|SHLB2_MOUSE Isoform 3 of Endophilin-B2 OS=Mus musculus OX=10090 GN=Sh3glb2	NaN	1	NaN	NaN	21	NaN	NaN	NaN	NaN	1	NaN	NaN	NaN	1	NaN	0.0909091	#DIV/0!	2	1	0	22	46	379
793	>tr|B7ZC46|B7ZC46_MOUSE Septin-8 OS=Mus musculus OX=10090 GN=Septin8 PE=1 SV=1	NaN	NaN	NaN	NaN	NaN	NaN	NaN	1	22	NaN	NaN	1	NaN	NaN	NaN	#DIV/0!	#DIV/0!	0	2	0	22	43	440
794	>sp|O70133-2|DHX9_MOUSE Isoform 2 of ATP-dependent RNA helicase A OS=Mus musculus OX=10090 GN=Dhx9	NaN	NaN	NaN	NaN	NaN	NaN	NaN	NaN	NaN	NaN	NaN	NaN	NaN	22	NaN	#DIV/0!	#DIV/0!	0	0	0	22	22	1381
795	>sp|Q9QXL2-4|KI21A_MOUSE Isoform 4 of Kinesin-like protein KIF21A OS=Mus musculus OX=10090 GN=Kif21a	NaN	NaN	NaN	NaN	NaN	NaN	NaN	NaN	NaN	NaN	NaN	NaN	NaN	NaN	NaN	#DIV/0!	#DIV/0!	0	0	0	22	22	1616
796	>tr|A0JNY3|A0JNY3_MOUSE Molybdopterin molybdenumtransferase OS=Mus musculus OX=10090 GN=Gphn PE=1 SV=1	NaN	NaN	NaN	NaN	NaN	NaN	NaN	NaN	NaN	NaN	NaN	NaN	NaN	NaN	NaN	#DIV/0!	#DIV/0!	0	0	0	22	22	772
797	>tr|Q8K1M3|Q8K1M3_MOUSE Protein kinase, cAMP dependent regulatory, type II alpha OS=Mus musculus OX=10090 GN=Prkar2a PE=1 SV=1	18	21	17	16	20	19	17	15	16	17	18	14	20	21	15	0.913043	0.198131	5	5	0	21	344	402
798	>sp|Q60737|CSK21_MOUSE Casein kinase II subunit alpha OS=Mus musculus OX=10090 GN=Csnk2a1 PE=1 SV=2	11	14	13	20	16	13	19	19	16	9	15	16	15	19	21	1.02703	0.874125	5	5	0	21	322	391
799	>sp|P68040|RACK1_MOUSE Receptor of activated protein C kinase 1 OS=Mus musculus OX=10090 GN=Rack1 PE=1 SV=3	14	21	15	18	15	15	12	14	15	18	14	9	19	18	21	0.891566	0.296693	5	5	0	21	314	317
800	>sp|Q9ESN6|TRIM2_MOUSE Tripartite motif-containing protein 2 OS=Mus musculus OX=10090 GN=Trim2 PE=1 SV=1	17	20	20	10	12	10	10	14	13	21	16	9	20	19	18	0.860759	0.467008	5	5	0	21	312	744
801	>sp|Q61885|MOG_MOUSE Myelin-oligodendrocyte glycoprotein OS=Mus musculus OX=10090 GN=Mog PE=1 SV=1	16	17	16	18	21	NaN	18	21	18	21	14	17	15	11	14	1.10795	0.1866	5	4	0	21	309	246
802	>sp|Q9QUP5|HPLN1_MOUSE Hyaluronan and proteoglycan link protein 1 OS=Mus musculus OX=10090 GN=Hapln1 PE=1 SV=1	19	21	19	12	19	19	16	15	13	10	18	12	19	16	12	0.811111	0.1539	5	5	0	21	309	356
803	>sp|Q9CR16|PPID_MOUSE Peptidyl-prolyl cis-trans isomerase D OS=Mus musculus OX=10090 GN=Ppid PE=1 SV=3	14	19	17	18	16	10	11	16	13	14	17	13	19	13	21	0.761905	0.0193712	5	5	0	21	308	370
804	>sp|O55125|NIPS1_MOUSE Protein NipSnap homolog 1 OS=Mus musculus OX=10090 GN=Nipsnap1 PE=1 SV=1	15	11	18	20	13	15	18	14	21	13	12	12	14	13	15	1.05195	0.724466	5	5	0	21	299	284
805	>sp|Q78PY7|SND1_MOUSE Staphylococcal nuclease domain-containing protein 1 OS=Mus musculus OX=10090 GN=Snd1 PE=1 SV=1	11	15	15	12	12	5	14	21	13	14	12	19	15	11	18	1.03077	0.884869	5	5	0	21	295	910
806	>sp|P62082|RS7_MOUSE 40S ribosomal protein S7 OS=Mus musculus OX=10090 GN=Rps7 PE=2 SV=1	11	12	11	13	15	11	21	17	15	8	17	19	18	7	17	1.16129	0.427289	5	5	0	21	292	194
807	>sp|Q8BVQ5|PPME1_MOUSE Protein phosphatase methylesterase 1 OS=Mus musculus OX=10090 GN=Ppme1 PE=1 SV=5	11	16	17	15	16	7	13	14	13	14	12	14	21	14	15	0.813333	0.135191	5	5	0	21	289	386
808	>sp|P35762|CD81_MOUSE CD81 antigen OS=Mus musculus OX=10090 GN=Cd81 PE=1 SV=2	17	12	10	13	12	16	21	10	19	18	20	9	7	15	16	1.3125	0.107773	5	5	0	21	288	236
809	>sp|P32921|SYWC_MOUSE Tryptophan--tRNA ligase, cytoplasmic OS=Mus musculus OX=10090 GN=Wars1 PE=1 SV=2	17	18	18	NaN	13	NaN	14	19	12	14	14	13	21	17	18	0.893939	0.394742	4	4	0	21	278	481
810	>sp|Q9DBP5|KCY_MOUSE UMP-CMP kinase OS=Mus musculus OX=10090 GN=Cmpk1 PE=1 SV=1	12	19	19	18	16	15	10	9	11	17	16	9	9	14	17	0.738095	0.0615297	5	5	0	21	276	196
811	>sp|Q91ZA3|PCCA_MOUSE Propionyl-CoA carboxylase alpha chain, mitochondrial OS=Mus musculus OX=10090 GN=Pcca PE=1 SV=2	16	21	15	16	14	11	10	13	16	14	8	10	17	18	9	0.780488	0.0560669	5	5	0	21	267	724
812	>tr|F8VPN4|F8VPN4_MOUSE Amylo-1,6-glucosidase, 4-alpha-glucanotransferase OS=Mus musculus OX=10090 GN=Agl PE=1 SV=1	12	15	8	14	12	3	8	21	10	12	10	18	16	17	17	0.885246	0.672425	5	5	0	21	265	1532
813	>sp|Q99K51|PLST_MOUSE Plastin-3 OS=Mus musculus OX=10090 GN=Pls3 PE=1 SV=3	8	11	10	13	13	7	9	16	15	17	14	10	21	15	16	1.16364	0.441443	5	5	0	21	245	630
814	>sp|P62141|PP1B_MOUSE Serine/threonine-protein phosphatase PP1-beta catalytic subunit OS=Mus musculus OX=10090 GN=Ppp1cb PE=1 SV=3	12	11	4	8	17	3	15	5	18	5	4	16	6	20	21	0.884615	0.755804	5	5	0	21	224	327
815	>sp|P12023|A4_MOUSE Amyloid-beta A4 protein OS=Mus musculus OX=10090 GN=App PE=1 SV=3	8	NaN	8	7	6	NaN	19	15	NaN	20	13	NaN	NaN	17	21	2.48276	0.00059297	4	3	0	21	220	770
816	>sp|Q64487|PTPRD_MOUSE Receptor-type tyrosine-protein phosphatase delta OS=Mus musculus OX=10090 GN=Ptprd PE=1 SV=3	17	21	14	9	7	13	NaN	NaN	9	17	13	12	15	13	8	0.955882	0.879994	5	3	0	21	216	1912
817	>sp|P31650|S6A11_MOUSE Sodium- and chloride-dependent GABA transporter 3 OS=Mus musculus OX=10090 GN=Slc6a11 PE=1 SV=2	18	10	16	21	6	11	3	6	9	8	3	8	5	19	12	0.521127	0.0563139	5	5	0	21	194	627
818	>sp|Q62059|CSPG2_MOUSE Versican core protein OS=Mus musculus OX=10090 GN=Vcan PE=1 SV=2	NaN	20	15	21	NaN	NaN	NaN	15	13	14	11	15	NaN	11	11	0.75	0.0742773	3	3	0	21	191	3357
819	>sp|O88485|DC1I1_MOUSE Cytoplasmic dynein 1 intermediate chain 1 OS=Mus musculus OX=10090 GN=Dync1i1 PE=1 SV=2	11	21	11	NaN	NaN	12	7	NaN	16	11	11	NaN	9	11	13	0.802326	0.460313	3	4	0	21	186	628
820	>sp|Q8CHG7|RPGF2_MOUSE Rap guanine nucleotide exchange factor 2 OS=Mus musculus OX=10090 GN=Rapgef2 PE=1 SV=2	14	NaN	18	21	NaN	NaN	NaN	13	13	15	NaN	NaN	NaN	17	14	0.773585	0.134196	3	3	0	21	163	1496
821	>tr|Q8BTS0|Q8BTS0_MOUSE DEAD (Asp-Glu-Ala-Asp) box polypeptide 5 OS=Mus musculus OX=10090 GN=Ddx5 PE=1 SV=1	NaN	19	20	21	NaN	NaN	NaN	12	NaN	NaN	NaN	NaN	NaN	NaN	NaN	0.6	#DIV/0!	3	1	0	21	104	615
822	>sp|O88343|S4A4_MOUSE Electrogenic sodium bicarbonate cotransporter 1 OS=Mus musculus OX=10090 GN=Slc4a4 PE=1 SV=2	NaN	NaN	NaN	NaN	NaN	NaN	NaN	14	NaN	NaN	9	10	NaN	NaN	NaN	#DIV/0!	#DIV/0!	0	1	0	21	54	1079
823	>tr|E9Q9H0|E9Q9H0_MOUSE Disks large homolog 1 OS=Mus musculus OX=10090 GN=Dlg1 PE=1 SV=1	NaN	NaN	21	NaN	NaN	NaN	14	NaN	NaN	NaN	NaN	NaN	NaN	NaN	NaN	0.666667	#DIV/0!	1	1	0	21	51	912
824	>tr|A2AFQ2|A2AFQ2_MOUSE 3-hydroxyacyl-CoA dehydrogenase type-2 OS=Mus musculus OX=10090 GN=Hsd17b10 PE=1 SV=1	NaN	NaN	NaN	NaN	NaN	NaN	NaN	NaN	NaN	21	NaN	NaN	NaN	21	NaN	#DIV/0!	#DIV/0!	0	1	0	21	42	271
825	>tr|E9Q0J5|E9Q0J5_MOUSE Kinesin-like protein KIF21A OS=Mus musculus OX=10090 GN=Kif21a PE=1 SV=2	NaN	NaN	NaN	NaN	NaN	NaN	NaN	NaN	19	NaN	NaN	21	NaN	NaN	NaN	#DIV/0!	#DIV/0!	0	1	0	21	40	1672
826	>tr|F8WGN6|F8WGN6_MOUSE Kinesin-like protein KIF21A OS=Mus musculus OX=10090 GN=Kif21a PE=1 SV=1	15	NaN	NaN	NaN	NaN	NaN	NaN	21	NaN	NaN	NaN	NaN	NaN	NaN	NaN	1.4	#DIV/0!	1	1	0	21	36	1628
827	>sp|O70318|E41L2_MOUSE Band 4.1-like protein 2 OS=Mus musculus OX=10090 GN=Epb41l2 PE=1 SV=2	NaN	21	NaN	NaN	NaN	NaN	NaN	1	NaN	NaN	NaN	NaN	NaN	NaN	13	0.047619	#DIV/0!	1	1	0	21	35	988
828	>sp|O35658|C1QBP_MOUSE Complement component 1 Q subcomponent-binding protein, mitochondrial OS=Mus musculus OX=10090 GN=C1qbp PE=1 SV=1	NaN	NaN	NaN	NaN	NaN	NaN	NaN	NaN	NaN	NaN	NaN	NaN	NaN	NaN	NaN	#DIV/0!	#DIV/0!	0	0	0	21	21	278
829	>sp|Q9CPV4-3|GLOD4_MOUSE Isoform 3 of Glyoxalase domain-containing protein 4 OS=Mus musculus OX=10090 GN=Glod4	NaN	NaN	NaN	21	NaN	NaN	NaN	NaN	NaN	NaN	NaN	NaN	NaN	NaN	NaN	#DIV/0!	#DIV/0!	1	0	0	21	21	279
830	>tr|E9QAX2|E9QAX2_MOUSE Unconventional myosin-XVIIIa OS=Mus musculus OX=10090 GN=Myo18a PE=1 SV=1	NaN	NaN	NaN	NaN	NaN	NaN	NaN	NaN	NaN	NaN	NaN	NaN	NaN	21	NaN	#DIV/0!	#DIV/0!	0	0	0	21	21	2083
831	>sp|P14206|RSSA_MOUSE 40S ribosomal protein SA OS=Mus musculus OX=10090 GN=Rpsa PE=1 SV=4	15	19	14	18	19	13	19	20	17	16	18	19	14	16	10	1	1	5	5	0	20	323	295
832	>sp|Q5FWK3|RHG01_MOUSE Rho GTPase-activating protein 1 OS=Mus musculus OX=10090 GN=Arhgap1 PE=1 SV=1	8	20	16	19	19	15	11	16	15	15	10	16	15	16	17	0.878049	0.423372	5	5	0	20	299	439
833	>sp|P28656|NP1L1_MOUSE Nucleosome assembly protein 1-like 1 OS=Mus musculus OX=10090 GN=Nap1l1 PE=1 SV=2	14	20	17	17	19	11	17	12	9	14	NaN	13	18	16	19	0.724138	0.0228787	5	5	0	20	298	391
834	>sp|Q9R0P5|DEST_MOUSE Destrin OS=Mus musculus OX=10090 GN=Dstn PE=1 SV=3	10	16	12	19	15	14	16	18	18	10	12	12	13	10	20	1.05556	0.721694	5	5	0	20	289	165
835	>tr|Q3TML0|Q3TML0_MOUSE Protein disulfide-isomerase A6 OS=Mus musculus OX=10090 GN=Pdia6 PE=1 SV=1	10	14	16	13	18	13	16	13	13	14	8	10	15	15	17	0.971831	0.793316	5	5	0	20	289	445
836	>sp|Q68FF6|GIT1_MOUSE ARF GTPase-activating protein GIT1 OS=Mus musculus OX=10090 GN=Git1 PE=1 SV=1	17	13	15	15	19	9	9	10	14	18	8	15	19	9	20	0.759494	0.0987709	5	5	0	20	287	770
837	>sp|P62743|AP2S1_MOUSE AP-2 complex subunit sigma OS=Mus musculus OX=10090 GN=Ap2s1 PE=1 SV=1	12	13	11	13	16	13	13	18	18	12	13	13	15	17	13	1.13846	0.282454	5	5	0	20	279	142
838	>sp|P84075|HPCA_MOUSE Neuron-specific calcium-binding protein hippocalcin OS=Mus musculus OX=10090 GN=Hpca PE=1 SV=2	12	16	13	18	17	12	13	20	12	13	19	19	12	10	13	0.921053	0.546904	5	5	0	20	279	193
839	>sp|O54829|RGS7_MOUSE Regulator of G-protein signaling 7 OS=Mus musculus OX=10090 GN=Rgs7 PE=1 SV=2	20	18	18	13	17	14	16	8	19	13	13	15	12	15	13	0.813953	0.175699	5	5	0	20	277	469
840	>sp|Q9CQ69|QCR8_MOUSE Cytochrome b-c1 complex subunit 8 OS=Mus musculus OX=10090 GN=Uqcrq PE=1 SV=3	12	20	13	15	20	17	15	10	15	9	11	14	12	10	14	0.825	0.260207	5	5	0	20	273	82
841	>sp|Q9QYF9|NDRG3_MOUSE Protein NDRG3 OS=Mus musculus OX=10090 GN=Ndrg3 PE=1 SV=1	12	20	18	16	20	11	14	17	12	10	9	NaN	14	12	18	0.744186	0.0534618	5	5	0	20	273	375
842	>sp|Q8R1Q8|DC1L1_MOUSE Cytoplasmic dynein 1 light intermediate chain 1 OS=Mus musculus OX=10090 GN=Dync1li1 PE=1 SV=1	14	15	14	15	19	14	9	13	13	8	15	8	15	11	12	0.74026	0.0303601	5	5	0	20	272	523
843	>sp|Q78ZA7|NP1L4_MOUSE Nucleosome assembly protein 1-like 4 OS=Mus musculus OX=10090 GN=Nap1l4 PE=1 SV=1	18	16	14	NaN	7	11	13	15	20	20	20	13	16	11	10	1.14909	0.509779	4	5	0	20	267	375
844	>sp|O09111|NDUBB_MOUSE NADH dehydrogenase [ubiquinone] 1 beta subcomplex subunit 11, mitochondrial OS=Mus musculus OX=10090 GN=Ndufb11 PE=1 SV=2	20	13	9	11	13	8	10	15	14	18	9	10	19	17	13	0.984848	0.94004	5	5	0	20	265	151
845	>sp|O08547|SC22B_MOUSE Vesicle-trafficking protein SEC22b OS=Mus musculus OX=10090 GN=Sec22b PE=1 SV=3	11	9	9	13	15	11	13	14	15	14	11	7	15	14	10	1.17544	0.176492	5	5	0	20	263	215
846	>sp|Q9ERK4|XPO2_MOUSE Exportin-2 OS=Mus musculus OX=10090 GN=Cse1l PE=1 SV=1	17	16	15	14	13	3	9	17	20	12	10	9	13	18	19	0.813333	0.38876	5	5	0	20	263	971
847	>sp|O35295|PURB_MOUSE Transcriptional activator protein Pur-beta OS=Mus musculus OX=10090 GN=Purb PE=1 SV=3	10	13	15	20	9	4	10	18	8	20	9	10	10	20	13	0.895522	0.708565	5	5	0	20	262	324
848	>tr|H3BJD6|H3BJD6_MOUSE Protein phosphatase 1, regulatory subunit 9A OS=Mus musculus OX=10090 GN=Ppp1r9a PE=1 SV=1	15	13	17	19	13	10	8	13	11	12	8	14	12	14	14	0.701299	0.0131095	5	5	0	20	261	1292
849	>sp|P11404|FABPH_MOUSE Fatty acid-binding protein, heart OS=Mus musculus OX=10090 GN=Fabp3 PE=1 SV=5	11	11	14	14	20	7	17	12	15	11	19	13	3	14	9	0.885714	0.520194	5	5	0	20	243	133
850	>sp|Q91YQ5|RPN1_MOUSE Dolichyl-diphosphooligosaccharide--protein glycosyltransferase subunit 1 OS=Mus musculus OX=10090 GN=Rpn1 PE=1 SV=1	8	16	7	14	20	8	15	12	9	13	12	16	8	9	9	0.876923	0.579099	5	5	0	20	241	608
851	>sp|P48453|PP2BB_MOUSE Serine/threonine-protein phosphatase 2B catalytic subunit beta isoform OS=Mus musculus OX=10090 GN=Ppp3cb PE=1 SV=2	17	13	10	11	12	14	16	NaN	11	14	10	10	17	10	16	1.09127	0.50635	5	4	0	20	240	525
852	>sp|Q8BTG7|NDRG4_MOUSE Protein NDRG4 OS=Mus musculus OX=10090 GN=Ndrg4 PE=1 SV=1	10	15	10	2	15	NaN	9	12	16	9	20	12	18	15	14	1.10577	0.730317	5	4	0	20	240	352
853	>sp|Q8R127|SCPDL_MOUSE Saccharopine dehydrogenase-like oxidoreductase OS=Mus musculus OX=10090 GN=Sccpdh PE=1 SV=1	14	19	12	14	14	6	11	9	15	10	13	5	13	20	13	0.69863	0.0465431	5	5	0	20	240	429
854	>sp|Q9D1K2|VATF_MOUSE V-type proton ATPase subunit F OS=Mus musculus OX=10090 GN=Atp6v1f PE=1 SV=2	20	14	10	14	7	17	13	8	13	10	16	9	7	11	13	0.938462	0.772271	5	5	0	20	238	119
855	>sp|O35381|AN32A_MOUSE Acidic leucine-rich nuclear phosphoprotein 32 family member A OS=Mus musculus OX=10090 GN=Anp32a PE=1 SV=1	14	15	9	12	11	11	8	13	11	15	8	7	10	10	13	0.95082	0.714211	5	5	0	20	229	247
856	>sp|P97351|RS3A_MOUSE 40S ribosomal protein S3a OS=Mus musculus OX=10090 GN=Rps3a PE=1 SV=3	10	16	14	18	20	12	8	7	13	6	8	13	9	10	10	0.589744	0.0201612	5	5	0	20	227	264
857	>sp|Q8R570|SNP47_MOUSE Synaptosomal-associated protein 47 OS=Mus musculus OX=10090 GN=Snap47 PE=1 SV=1	9	12	9	13	12	8	10	11	11	12	9	9	8	12	14	0.945455	0.592708	5	5	0	20	227	413
858	>sp|Q9CPQ3|TOM22_MOUSE Mitochondrial import receptor subunit TOM22 homolog OS=Mus musculus OX=10090 GN=Tomm22 PE=1 SV=3	8	10	10	10	9	6	8	10	7	10	17	11	14	12	8	0.87234	0.216547	5	5	0	20	225	142
859	>sp|Q9CZ44|NSF1C_MOUSE NSFL1 cofactor p47 OS=Mus musculus OX=10090 GN=Nsfl1c PE=1 SV=1	11	NaN	12	12	10	NaN	NaN	12	14	10	12	16	11	15	14	1.06667	0.532724	4	3	0	20	222	370
860	>sp|Q8BG32|PSD11_MOUSE 26S proteasome non-ATPase regulatory subunit 11 OS=Mus musculus OX=10090 GN=Psmd11 PE=1 SV=3	9	20	10	12	9	12	7	8	13	11	15	8	12	10	9	0.85	0.470224	5	5	0	20	218	422
861	>sp|P17879|HS71B_MOUSE Heat shock 70 kDa protein 1B OS=Mus musculus OX=10090 GN=Hspa1b PE=1 SV=3	14	20	9	12	13	NaN	NaN	14	7	14	16	10	17	NaN	16	0.857843	0.536461	5	3	0	20	214	642
862	>sp|Q64105|SPRE_MOUSE Sepiapterin reductase OS=Mus musculus OX=10090 GN=Spr PE=1 SV=1	19	9	NaN	NaN	7	12	13	19	11	17	NaN	16	NaN	14	9	1.23429	0.451805	3	5	0	20	204	261
863	>sp|P28740-1|KIF2A_MOUSE Isoform 1 of Kinesin-like protein KIF2A OS=Mus musculus OX=10090 GN=Kif2a	13	NaN	18	12	14	7	NaN	11	16	20	NaN	13	14	15	NaN	0.947368	0.818744	4	4	0	20	203	716
864	>sp|P61294|RAB6B_MOUSE Ras-related protein Rab-6B OS=Mus musculus OX=10090 GN=Rab6b PE=1 SV=1	11	6	3	8	14	5	18	9	20	11	12	11	7	7	10	1.5	0.251012	5	5	0	20	200	208
865	>sp|Q8BIZ1|ANS1B_MOUSE Ankyrin repeat and sterile alpha motif domain-containing protein 1B OS=Mus musculus OX=10090 GN=Anks1b PE=1 SV=3	NaN	10	13	NaN	17	NaN	15	16	20	11	NaN	NaN	17	NaN	NaN	1.1625	0.469183	3	4	0	20	161	1259
866	>sp|Q8CHT1-2|NGEF_MOUSE Isoform 2 of Ephexin-1 OS=Mus musculus OX=10090 GN=Ngef	NaN	NaN	12	NaN	NaN	NaN	NaN	13	NaN	11	NaN	20	15	NaN	NaN	1	#DIV/0!	1	2	0	20	127	620
867	>tr|H3BJX8|H3BJX8_MOUSE Rho guanine nucleotide exchange factor 2 OS=Mus musculus OX=10090 GN=Arhgef2 PE=1 SV=2	15	20	NaN	NaN	18	8	NaN	NaN	NaN	14	14	NaN	16	NaN	NaN	0.622642	0.106527	3	2	0	20	123	1183
868	>sp|Q9Z0H4-4|CELF2_MOUSE Isoform 4 of CUGBP Elav-like family member 2 OS=Mus musculus OX=10090 GN=Celf2	15	20	12	12	14	NaN	NaN	NaN	10	NaN	NaN	NaN	NaN	11	NaN	0.684932	#DIV/0!	5	1	0	20	110	490
869	>sp|Q9R1V6-10|ADA22_MOUSE Isoform 8 of Disintegrin and metalloproteinase domain-containing protein 22 OS=Mus musculus OX=10090 GN=Adam22	13	NaN	NaN	NaN	19	NaN	NaN	20	NaN	NaN	NaN	NaN	NaN	12	NaN	1.25	#DIV/0!	2	1	0	20	99	907
870	>sp|Q9R1V6|ADA22_MOUSE Disintegrin and metalloproteinase domain-containing protein 22 OS=Mus musculus OX=10090 GN=Adam22 PE=1 SV=2	NaN	18	10	NaN	NaN	NaN	20	NaN	15	NaN	NaN	NaN	NaN	NaN	9	1.25	0.535394	2	2	0	20	85	904
871	>sp|Q9R1V6-12|ADA22_MOUSE Isoform 10 of Disintegrin and metalloproteinase domain-containing protein 22 OS=Mus musculus OX=10090 GN=Adam22	NaN	NaN	NaN	NaN	NaN	NaN	NaN	NaN	NaN	11	NaN	20	NaN	NaN	NaN	#DIV/0!	#DIV/0!	0	1	0	20	64	980
872	>tr|D3YXH0|D3YXH0_MOUSE Predicted gene, 49948 OS=Mus musculus OX=10090 GN=Gm49948 PE=4 SV=1	NaN	NaN	NaN	NaN	NaN	11	NaN	NaN	NaN	NaN	NaN	20	7	16	NaN	#DIV/0!	#DIV/0!	0	1	0	20	63	298
873	>tr|Q08EB5|Q08EB5_MOUSE CLIP-associating protein 2 OS=Mus musculus OX=10090 GN=Clasp2 PE=1 SV=1	16	NaN	20	NaN	NaN	11	NaN	16	NaN	NaN	NaN	NaN	NaN	NaN	NaN	0.75	0.295066	2	2	0	20	63	1304
874	>tr|Q8BG33|Q8BG33_MOUSE Neurotrimin OS=Mus musculus OX=10090 GN=Ntm PE=1 SV=1	NaN	NaN	NaN	NaN	NaN	NaN	NaN	NaN	NaN	20	NaN	NaN	NaN	NaN	NaN	#DIV/0!	#DIV/0!	0	1	0	20	39	344
875	>sp|P11881-3|ITPR1_MOUSE Isoform 3 of Inositol 1,4,5-trisphosphate receptor type 1 OS=Mus musculus OX=10090 GN=Itpr1	NaN	NaN	20	NaN	NaN	NaN	NaN	NaN	NaN	NaN	18	NaN	NaN	NaN	NaN	#DIV/0!	#DIV/0!	1	0	0	20	38	2748
876	>tr|A2AFQ0|A2AFQ0_MOUSE E3 ubiquitin-protein ligase HUWE1 OS=Mus musculus OX=10090 GN=Huwe1 PE=1 SV=1	NaN	NaN	NaN	NaN	NaN	NaN	6	NaN	NaN	NaN	NaN	NaN	NaN	NaN	NaN	#DIV/0!	#DIV/0!	0	1	0	20	26	4378
877	>sp|Q8VDQ8|SIR2_MOUSE NAD-dependent protein deacetylase sirtuin-2 OS=Mus musculus OX=10090 GN=Sirt2 PE=1 SV=2	NaN	NaN	NaN	NaN	NaN	NaN	NaN	NaN	NaN	NaN	NaN	NaN	NaN	NaN	NaN	#DIV/0!	#DIV/0!	0	0	0	20	20	389
878	>tr|F8WHW6|F8WHW6_MOUSE Phosphatidylinositol 4-phosphate 5-kinase type-1 gamma OS=Mus musculus OX=10090 GN=Pip5k1c PE=1 SV=1	NaN	NaN	NaN	NaN	NaN	NaN	NaN	NaN	NaN	NaN	NaN	NaN	NaN	NaN	NaN	#DIV/0!	#DIV/0!	0	0	0	20	20	687
879	>sp|P48320|DCE2_MOUSE Glutamate decarboxylase 2 OS=Mus musculus OX=10090 GN=Gad2 PE=1 SV=1	16	17	14	17	16	7	16	13	17	18	12	15	18	15	19	0.8875	0.407508	5	5	0	19	310	585
880	>sp|P70175|DLG3_MOUSE Disks large homolog 3 OS=Mus musculus OX=10090 GN=Dlg3 PE=1 SV=1	15	18	19	NaN	15	12	12	14	15	16	18	11	18	17	12	0.823881	0.0548447	4	5	0	19	291	849
881	>sp|P99027|RLA2_MOUSE 60S acidic ribosomal protein P2 OS=Mus musculus OX=10090 GN=Rplp2 PE=1 SV=3	16	18	15	19	13	18	11	10	15	14	15	12	11	19	15	0.839506	0.184174	5	5	0	19	290	115
882	>sp|Q9D8E6|RL4_MOUSE 60S ribosomal protein L4 OS=Mus musculus OX=10090 GN=Rpl4 PE=1 SV=3	13	14	15	12	13	11	17	16	16	14	17	19	15	16	13	1.10448	0.27069	5	5	0	19	288	419
883	>sp|P62482|KCAB2_MOUSE Voltage-gated potassium channel subunit beta-2 OS=Mus musculus OX=10090 GN=Kcnab2 PE=1 SV=1	14	13	11	17	12	12	14	16	14	12	13	13	14	15	15	1.01493	0.879032	5	5	0	19	284	367
884	>tr|A0A2R8VK70|A0A2R8VK70_MOUSE Leukocyte surface antigen CD47 OS=Mus musculus OX=10090 GN=Cd47 PE=1 SV=1	19	15	15	19	15	15	18	17	15	17	18	15	NaN	13	8	0.987952	0.866129	5	5	0	19	284	321
885	>sp|Q9QYJ0|DNJA2_MOUSE DnaJ homolog subfamily A member 2 OS=Mus musculus OX=10090 GN=Dnaja2 PE=1 SV=1	13	16	12	18	5	7	17	14	8	17	7	16	19	15	13	0.984375	0.950116	5	5	0	19	269	412
886	>sp|P09528|FRIH_MOUSE Ferritin heavy chain OS=Mus musculus OX=10090 GN=Fth1 PE=1 SV=2	14	15	10	15	10	14	15	14	15	9	14	7	12	19	12	1.04688	0.719479	5	5	0	19	266	182
887	>sp|Q9DCJ5|NDUA8_MOUSE NADH dehydrogenase [ubiquinone] 1 alpha subcomplex subunit 8 OS=Mus musculus OX=10090 GN=Ndufa8 PE=1 SV=3	15	11	11	19	15	16	13	19	12	12	9	8	12	14	15	1.01408	0.923749	5	5	0	19	266	172
888	>sp|P49722|PSA2_MOUSE Proteasome subunit alpha type-2 OS=Mus musculus OX=10090 GN=Psma2 PE=1 SV=3	14	11	14	14	9	9	11	17	16	10	13	10	14	15	14	1.01613	0.919964	5	5	0	19	265	234
889	>sp|P70398|USP9X_MOUSE Probable ubiquitin carboxyl-terminal hydrolase FAF-X OS=Mus musculus OX=10090 GN=Usp9x PE=1 SV=2	13	15	9	16	14	4	11	12	15	19	12	8	17	12	15	0.910448	0.67486	5	5	0	19	264	2559
890	>sp|Q8R164|BPHL_MOUSE Valacyclovir hydrolase OS=Mus musculus OX=10090 GN=Bphl PE=1 SV=1	12	16	14	16	13	10	13	13	15	9	10	14	12	14	14	0.84507	0.14349	5	5	0	19	264	291
891	>sp|Q8K021|SCAM1_MOUSE Secretory carrier-associated membrane protein 1 OS=Mus musculus OX=10090 GN=Scamp1 PE=1 SV=1	19	9	13	14	12	15	9	13	10	18	14	11	9	14	12	0.970149	0.86712	5	5	0	19	257	338
892	>sp|Q64133|AOFA_MOUSE Amine oxidase [flavin-containing] A OS=Mus musculus OX=10090 GN=Maoa PE=1 SV=3	10	15	10	16	15	6	10	12	10	13	16	8	14	14	12	0.772727	0.131009	5	5	0	19	256	526
893	>sp|O35215|DOPD_MOUSE D-dopachrome decarboxylase OS=Mus musculus OX=10090 GN=Ddt PE=1 SV=3	10	9	9	10	12	11	12	19	19	12	15	14	7	13	13	1.46	0.0406916	5	5	0	19	255	118
894	>sp|Q9R0P3|ESTD_MOUSE S-formylglutathione hydrolase OS=Mus musculus OX=10090 GN=Esd PE=1 SV=1	12	16	14	16	11	5	16	14	15	11	15	10	11	12	12	0.884058	0.493786	5	5	0	19	254	282
895	>sp|O35678|MGLL_MOUSE Monoglyceride lipase OS=Mus musculus OX=10090 GN=Mgll PE=1 SV=1	9	13	15	13	19	2	12	10	11	16	18	NaN	14	10	13	0.73913	0.235595	5	5	0	19	250	303
896	>sp|P13707|GPDA_MOUSE Glycerol-3-phosphate dehydrogenase [NAD(+)], cytoplasmic OS=Mus musculus OX=10090 GN=Gpd1 PE=1 SV=3	11	14	10	15	13	8	13	16	19	9	15	16	16	9	10	1.03175	0.864599	5	5	0	19	250	349
897	>sp|Q3UNH4|GRIN1_MOUSE G protein-regulated inducer of neurite outgrowth 1 OS=Mus musculus OX=10090 GN=Gprin1 PE=1 SV=2	12	17	19	11	13	18	13	11	7	12	8	8	10	14	13	0.847222	0.375655	5	5	0	19	246	932
898	>sp|Q60605-2|MYL6_MOUSE Isoform Smooth muscle of Myosin light polypeptide 6 OS=Mus musculus OX=10090 GN=Myl6	14	18	10	12	8	11	7	12	11	11	9	8	14	19	18	0.83871	0.330082	5	5	0	19	241	151
899	>sp|Q6R891|NEB2_MOUSE Neurabin-2 OS=Mus musculus OX=10090 GN=Ppp1r9b PE=1 SV=1	9	12	12	10	11	14	11	13	10	10	15	7	19	15	9	1.07407	0.446813	5	5	0	19	240	817
900	>sp|Q9D898|ARP5L_MOUSE Actin-related protein 2/3 complex subunit 5-like protein OS=Mus musculus OX=10090 GN=Arpc5l PE=1 SV=1	9	11	8	7	11	9	15	13	13	10	12	11	16	10	9	1.30435	0.0728844	5	5	0	19	239	153
901	>tr|Q7TNL5|Q7TNL5_MOUSE Serine/threonine-protein phosphatase 2A 56 kDa regulatory subunit OS=Mus musculus OX=10090 GN=Ppp2r5d PE=1 SV=1	17	11	11	19	10	7	14	12	12	16	8	10	13	13	10	0.897059	0.570449	5	5	0	19	239	595
902	>sp|Q3UIU2|NDUB6_MOUSE NADH dehydrogenase [ubiquinone] 1 beta subcomplex subunit 6 OS=Mus musculus OX=10090 GN=Ndufb6 PE=1 SV=3	19	11	12	18	12	NaN	11	10	10	15	8	14	8	11	8	0.798611	0.225898	5	4	0	19	236	128
903	>sp|P12658|CALB1_MOUSE Calbindin OS=Mus musculus OX=10090 GN=Calb1 PE=1 SV=2	7	13	18	15	7	14	8	10	19	5	13	12	9	8	16	0.933333	0.813289	5	5	0	19	232	261
904	>sp|Q6P9K9|NRX3A_MOUSE Neurexin-3 OS=Mus musculus OX=10090 GN=Nrxn3 PE=1 SV=2	NaN	19	NaN	12	12	9	11	NaN	15	14	14	10	13	18	12	0.854651	0.449867	3	4	0	19	232	1571
905	>sp|Q61166|MARE1_MOUSE Microtubule-associated protein RP/EB family member 1 OS=Mus musculus OX=10090 GN=Mapre1 PE=1 SV=3	17	15	19	16	14	7	4	8	11	8	10	7	12	14	11	0.469136	0.000295563	5	5	0	19	231	268
906	>sp|B1AWN6|SCN2A_MOUSE Sodium channel protein type 2 subunit alpha OS=Mus musculus OX=10090 GN=Scn2a PE=1 SV=1	7	12	13	7	10	10	12	13	19	11	8	9	16	16	12	1.32653	0.150036	5	5	0	19	228	2006
907	>sp|Q9DBG6|RPN2_MOUSE Dolichyl-diphosphooligosaccharide--protein glycosyltransferase subunit 2 OS=Mus musculus OX=10090 GN=Rpn2 PE=1 SV=1	13	17	8	14	19	8	11	16	13	13	10	4	NaN	14	9	0.859155	0.409444	5	5	0	19	223	631
908	>sp|O70251|EF1B_MOUSE Elongation factor 1-beta OS=Mus musculus OX=10090 GN=Eef1b PE=1 SV=5	8	8	7	11	8	11	12	17	9	10	14	11	15	9	14	1.40476	0.0594844	5	5	0	19	221	225
909	>sp|O70310|NMT1_MOUSE Glycylpeptide N-tetradecanoyltransferase 1 OS=Mus musculus OX=10090 GN=Nmt1 PE=1 SV=1	5	6	9	7	11	5	8	15	17	9	16	18	6	5	10	1.42105	0.234695	5	5	0	19	205	496
910	>sp|Q0KL02|TRIO_MOUSE Triple functional domain protein OS=Mus musculus OX=10090 GN=Trio PE=1 SV=3	10	16	13	NaN	NaN	5	9	12	15	8	8	6	15	8	13	0.753846	0.26657	3	5	0	19	202	3102
911	>sp|Q9QZX7|SRR_MOUSE Serine racemase OS=Mus musculus OX=10090 GN=Srr PE=1 SV=1	5	19	8	13	14	NaN	8	10	12	10	12	9	10	7	9	0.847458	0.548417	5	4	0	19	202	339
912	>sp|Q80TE7|LRRC7_MOUSE Leucine-rich repeat-containing protein 7 OS=Mus musculus OX=10090 GN=Lrrc7 PE=1 SV=2	8	15	16	8	15	7	8	8	NaN	13	6	8	18	12	11	0.725806	0.194137	5	4	0	19	197	1490
913	>sp|P63005|LIS1_MOUSE Platelet-activating factor acetylhydrolase IB subunit alpha OS=Mus musculus OX=10090 GN=Pafah1b1 PE=1 SV=2	12	9	12	18	9	8	5	7	19	6	5	10	8	13	9	0.75	0.351596	5	5	0	19	179	410
914	>sp|Q8VEH3|ARL8A_MOUSE ADP-ribosylation factor-like protein 8A OS=Mus musculus OX=10090 GN=Arl8a PE=1 SV=1	1	18	18	11	4	6	15	4	19	11	3	11	4	19	6	1.05769	0.896484	5	5	0	19	172	186
915	>tr|Q3UGX2|Q3UGX2_MOUSE Spectrin beta chain OS=Mus musculus OX=10090 GN=Sptb PE=1 SV=1	8	14	11	9	4	NaN	NaN	NaN	16	8	NaN	10	19	14	11	1.30435	0.458313	5	2	0	19	170	2329
916	>sp|P97450|ATP5J_MOUSE ATP synthase-coupling factor 6, mitochondrial OS=Mus musculus OX=10090 GN=Atp5pf PE=1 SV=1	8	4	12	5	7	14	10	7	6	13	5	13	2	19	5	1.38889	0.220557	5	5	0	19	166	108
917	>sp|Q6PH08|ERC2_MOUSE ERC protein 2 OS=Mus musculus OX=10090 GN=Erc2 PE=1 SV=2	6	15	10	16	NaN	14	NaN	NaN	19	4	8	NaN	12	NaN	10	1.04965	0.904043	4	3	0	19	151	957
918	>sp|Q811P8|RHG32_MOUSE Rho GTPase-activating protein 32 OS=Mus musculus OX=10090 GN=Arhgap32 PE=1 SV=2	5	4	8	15	9	7	6	18	2	6	6	9	4	6	19	0.95122	0.906894	5	5	0	19	149	2089
919	>tr|E0CZF0|E0CZF0_MOUSE Essential MCU regulator, mitochondrial OS=Mus musculus OX=10090 GN=Smdt1 PE=1 SV=1	NaN	10	NaN	7	16	NaN	18	10	15	10	NaN	NaN	8	NaN	10	1.20455	0.515586	3	4	0	19	149	71
920	>sp|O70133|DHX9_MOUSE ATP-dependent RNA helicase A OS=Mus musculus OX=10090 GN=Dhx9 PE=1 SV=2	15	NaN	NaN	NaN	19	NaN	NaN	18	NaN	16	NaN	NaN	NaN	NaN	18	1	1	2	2	0	19	104	1380
921	>sp|Q9JLB0-2|MPP6_MOUSE Isoform Alpha of MAGUK p55 subfamily member 6 OS=Mus musculus OX=10090 GN=Mpp6	10	9	9	14	8	NaN	NaN	NaN	NaN	19	11	NaN	9	14	NaN	1.9	#DIV/0!	5	1	0	19	103	539
922	>tr|F7B5B5|F7B5B5_MOUSE Heterogeneous nuclear ribonucleoprotein R OS=Mus musculus OX=10090 GN=Hnrnpr PE=1 SV=1	12	NaN	11	NaN	NaN	19	6	NaN	NaN	9	NaN	NaN	NaN	NaN	16	0.985507	0.975922	2	3	0	19	84	531
923	>sp|Q80TN7|NAV3_MOUSE Neuron navigator 3 OS=Mus musculus OX=10090 GN=Nav3 PE=1 SV=2	NaN	NaN	NaN	19	NaN	NaN	NaN	NaN	NaN	12	8	NaN	NaN	NaN	NaN	0.631579	#DIV/0!	1	1	0	19	66	2359
924	>sp|Q8R5M8|CADM1_MOUSE Cell adhesion molecule 1 OS=Mus musculus OX=10090 GN=Cadm1 PE=1 SV=2	NaN	NaN	NaN	NaN	NaN	NaN	NaN	NaN	NaN	NaN	NaN	13	NaN	NaN	NaN	#DIV/0!	#DIV/0!	0	0	0	19	47	456
925	>sp|O88712-2|CTBP1_MOUSE Isoform 2 of C-terminal-binding protein 1 OS=Mus musculus OX=10090 GN=Ctbp1	NaN	NaN	NaN	NaN	19	NaN	NaN	NaN	NaN	NaN	NaN	NaN	NaN	NaN	NaN	#DIV/0!	#DIV/0!	1	0	0	19	19	430
926	>sp|Q811D0-2|DLG1_MOUSE Isoform 2 of Disks large homolog 1 OS=Mus musculus OX=10090 GN=Dlg1	NaN	NaN	NaN	19	NaN	NaN	NaN	NaN	NaN	NaN	NaN	NaN	NaN	NaN	NaN	#DIV/0!	#DIV/0!	1	0	0	19	19	893
927	>tr|A2AGQ6|A2AGQ6_MOUSE MAP kinase-activating death domain protein OS=Mus musculus OX=10090 GN=Madd PE=1 SV=1	NaN	NaN	NaN	NaN	NaN	NaN	NaN	NaN	NaN	NaN	NaN	NaN	NaN	NaN	NaN	#DIV/0!	#DIV/0!	0	0	0	19	19	1602
928	>tr|A2AGR0|A2AGR0_MOUSE MAP kinase-activating death domain protein OS=Mus musculus OX=10090 GN=Madd PE=1 SV=1	NaN	NaN	NaN	NaN	NaN	NaN	NaN	NaN	NaN	NaN	NaN	19	NaN	NaN	NaN	#DIV/0!	#DIV/0!	0	0	0	19	19	1577
929	>tr|Q5U4C2|Q5U4C2_MOUSE Dipeptidyl aminopeptidase-like protein 6 OS=Mus musculus OX=10090 GN=Dpp6 PE=1 SV=1	NaN	NaN	NaN	NaN	NaN	NaN	NaN	NaN	NaN	NaN	NaN	NaN	19	NaN	NaN	#DIV/0!	#DIV/0!	0	0	0	19	19	801
930	>sp|Q8BH66|ATLA1_MOUSE Atlastin-1 OS=Mus musculus OX=10090 GN=Atl1 PE=1 SV=1	14	15	12	14	11	12	15	17	17	13	11	12	16	14	14	1.12121	0.2388	5	5	0	18	273	558
931	>sp|Q9DCW4|ETFB_MOUSE Electron transfer flavoprotein subunit beta OS=Mus musculus OX=10090 GN=Etfb PE=1 SV=3	17	15	15	14	15	18	14	14	13	11	12	17	9	17	13	0.921053	0.36187	5	5	0	18	269	255
932	>sp|Q8CGC7|SYEP_MOUSE Bifunctional glutamate/proline--tRNA ligase OS=Mus musculus OX=10090 GN=Eprs1 PE=1 SV=4	11	17	13	14	11	8	16	18	15	14	14	16	15	14	15	1.07576	0.633858	5	5	0	18	266	1512
933	>sp|Q8C0M9|ASGL1_MOUSE Isoaspartyl peptidase/L-asparaginase OS=Mus musculus OX=10090 GN=Asrgl1 PE=1 SV=1	18	14	11	14	11	11	15	17	10	13	13	14	10	14	11	0.970588	0.831236	5	5	0	18	265	326
934	>sp|Q9CQX2|CYB5B_MOUSE Cytochrome b5 type B OS=Mus musculus OX=10090 GN=Cyb5b PE=1 SV=1	18	15	14	10	14	14	12	11	15	17	12	8	9	13	17	0.971831	0.816437	5	5	0	18	264	146
935	>sp|Q91VR5|DDX1_MOUSE ATP-dependent RNA helicase DDX1 OS=Mus musculus OX=10090 GN=Ddx1 PE=1 SV=1	11	15	8	14	14	4	10	13	14	14	8	14	16	17	15	0.887097	0.558516	5	5	0	18	258	740
936	>sp|P51174|ACADL_MOUSE Long-chain specific acyl-CoA dehydrogenase, mitochondrial OS=Mus musculus OX=10090 GN=Acadl PE=1 SV=2	18	16	11	18	7	18	11	11	13	16	NaN	12	16	18	13	0.985714	0.94004	5	5	0	18	257	430
937	>sp|Q99JR1|SFXN1_MOUSE Sideroflexin-1 OS=Mus musculus OX=10090 GN=Sfxn1 PE=1 SV=3	11	18	12	12	7	11	12	14	11	10	16	13	13	13	15	0.966667	0.837409	5	5	0	18	254	322
938	>sp|O70443|GNAZ_MOUSE Guanine nucleotide-binding protein G(z) subunit alpha OS=Mus musculus OX=10090 GN=Gnaz PE=1 SV=4	8	13	16	9	16	12	11	15	16	13	17	10	16	12	18	1.08065	0.618158	5	5	0	18	253	355
939	>sp|P47955|RLA1_MOUSE 60S acidic ribosomal protein P1 OS=Mus musculus OX=10090 GN=Rplp1 PE=1 SV=1	10	11	18	10	14	11	12	14	12	16	13	11	12	10	12	1.03175	0.827607	5	5	0	18	248	114
940	>sp|Q3TXS7|PSMD1_MOUSE 26S proteasome non-ATPase regulatory subunit 1 OS=Mus musculus OX=10090 GN=Psmd1 PE=1 SV=1	8	14	11	18	12	12	12	13	14	12	7	12	14	14	11	1	1	5	5	0	18	243	953
941	>sp|Q9WUM4|COR1C_MOUSE Coronin-1C OS=Mus musculus OX=10090 GN=Coro1c PE=1 SV=2	10	11	13	12	9	18	13	15	15	9	15	12	8	14	14	1.27273	0.105322	5	5	0	18	243	474
942	>sp|Q8BP47|SYNC_MOUSE Asparagine--tRNA ligase, cytoplasmic OS=Mus musculus OX=10090 GN=NARS1 PE=1 SV=2	12	14	13	12	7	9	13	9	12	13	9	9	11	8	16	0.965517	0.798638	5	5	0	18	242	559
943	>sp|Q9WTX5|SKP1_MOUSE S-phase kinase-associated protein 1 OS=Mus musculus OX=10090 GN=Skp1 PE=1 SV=3	7	16	13	13	18	8	10	10	16	10	14	10	7	8	13	0.80597	0.291467	5	5	0	18	242	163
944	>sp|P63037|DNJA1_MOUSE DnaJ homolog subfamily A member 1 OS=Mus musculus OX=10090 GN=Dnaja1 PE=1 SV=1	11	9	14	14	12	10	10	18	9	12	10	12	7	9	12	0.983333	0.917962	5	5	0	18	237	397
945	>sp|P14733|LMNB1_MOUSE Lamin-B1 OS=Mus musculus OX=10090 GN=Lmnb1 PE=1 SV=3	14	11	10	17	13	8	6	13	9	13	12	6	11	15	18	0.753846	0.12275	5	5	0	18	235	588
946	>sp|Q62167|DDX3X_MOUSE ATP-dependent RNA helicase DDX3X OS=Mus musculus OX=10090 GN=Ddx3x PE=1 SV=3	8	15	11	12	18	11	6	9	14	7	8	16	11	14	14	0.734375	0.166869	5	5	0	18	234	662
947	>sp|Q9CQ60|6PGL_MOUSE 6-phosphogluconolactonase OS=Mus musculus OX=10090 GN=Pgls PE=1 SV=1	12	11	13	9	12	8	12	9	8	12	11	15	14	13	8	0.859649	0.198131	5	5	0	18	233	257
948	>sp|Q9CZ42|NNRD_MOUSE ATP-dependent (S)-NAD(P)H-hydrate dehydratase OS=Mus musculus OX=10090 GN=Naxd PE=1 SV=1	13	11	14	14	15	13	10	8	NaN	13	14	11	11	13	NaN	0.820896	0.112394	5	4	0	18	229	343
949	>sp|A2ALS5|RPGP1_MOUSE Rap1 GTPase-activating protein 1 OS=Mus musculus OX=10090 GN=Rap1gap PE=1 SV=2	16	12	NaN	14	12	9	13	12	14	18	8	10	13	16	7	0.977778	0.876403	4	5	0	18	228	663
950	>sp|Q3UGR5|HDHD2_MOUSE Haloacid dehalogenase-like hydrolase domain-containing protein 2 OS=Mus musculus OX=10090 GN=Hdhd2 PE=1 SV=2	8	15	13	8	17	14	9	12	9	10	11	10	8	8	10	0.885246	0.517671	5	5	0	18	228	259
951	>tr|F7BJK1|F7BJK1_MOUSE Protocadherin 1 (Fragment) OS=Mus musculus OX=10090 GN=Pcdh1 PE=1 SV=1	18	12	13	18	10	14	9	12	14	11	1	NaN	15	17	18	0.84507	0.275945	5	5	0	18	228	1077
952	>sp|P63321|RALA_MOUSE Ras-related protein Ral-A OS=Mus musculus OX=10090 GN=Rala PE=1 SV=1	12	10	9	9	11	13	10	9	18	10	8	10	7	12	11	1.17647	0.332096	5	5	0	18	227	206
953	>sp|Q91XL9|OSBL1_MOUSE Oxysterol-binding protein-related protein 1 OS=Mus musculus OX=10090 GN=Osbpl1a PE=1 SV=2	8	15	9	18	10	5	13	12	10	12	11	14	11	13	10	0.866667	0.523742	5	5	0	18	225	950
954	>sp|Q06890|CLUS_MOUSE Clusterin OS=Mus musculus OX=10090 GN=Clu PE=1 SV=1	9	7	10	12	6	13	9	7	11	12	9	8	17	18	15	1.18182	0.322238	5	5	0	18	221	448
955	>sp|Q9DCS3|MECR_MOUSE Enoyl-[acyl-carrier-protein] reductase, mitochondrial OS=Mus musculus OX=10090 GN=Mecr PE=1 SV=2	12	15	14	12	10	5	10	12	13	18	10	7	13	11	10	0.920635	0.673189	5	5	0	18	221	373
956	>sp|P17156|HSP72_MOUSE Heat shock-related 70 kDa protein 2 OS=Mus musculus OX=10090 GN=Hspa2 PE=1 SV=2	17	7	9	13	11	18	10	12	11	9	7	11	12	10	7	1.05263	0.803832	5	5	0	18	220	633
957	>sp|Q6P1B1|XPP1_MOUSE Xaa-Pro aminopeptidase 1 OS=Mus musculus OX=10090 GN=Xpnpep1 PE=1 SV=1	16	12	13	18	6	6	10	14	9	NaN	17	14	17	12	11	0.75	0.274199	5	4	0	18	219	623
958	>sp|O55106|STRN_MOUSE Striatin OS=Mus musculus OX=10090 GN=Strn PE=1 SV=2	14	11	11	13	9	7	6	6	10	13	12	11	14	18	9	0.724138	0.0834395	5	5	0	18	216	780
959	>sp|Q91VM9|IPYR2_MOUSE Inorganic pyrophosphatase 2, mitochondrial OS=Mus musculus OX=10090 GN=Ppa2 PE=1 SV=1	16	10	15	13	9	6	6	11	14	8	8	18	10	14	6	0.714286	0.119279	5	5	0	18	215	330
960	>sp|P48318|DCE1_MOUSE Glutamate decarboxylase 1 OS=Mus musculus OX=10090 GN=Gad1 PE=1 SV=2	15	12	9	9	7	3	12	12	13	8	7	11	9	7	11	0.923077	0.739982	5	5	0	18	214	593
961	>sp|Q3V3R1|C1TM_MOUSE Monofunctional C1-tetrahydrofolate synthase, mitochondrial OS=Mus musculus OX=10090 GN=Mthfd1l PE=1 SV=2	9	14	15	10	18	6	7	12	12	13	9	9	10	10	15	0.757576	0.183878	5	5	0	18	212	977
962	>sp|Q60634|FLOT2_MOUSE Flotillin-2 OS=Mus musculus OX=10090 GN=Flot2 PE=1 SV=2	13	12	11	12	10	17	4	9	14	8	6	NaN	9	18	13	0.896552	0.623316	5	5	0	18	210	428
963	>sp|Q7TMK9|HNRPQ_MOUSE Heterogeneous nuclear ribonucleoprotein Q OS=Mus musculus OX=10090 GN=Syncrip PE=1 SV=2	6	9	17	8	NaN	NaN	16	17	10	14	16	8	9	NaN	10	1.425	0.188973	4	4	0	18	205	623
964	>sp|Q9Z0X1|AIFM1_MOUSE Apoptosis-inducing factor 1, mitochondrial OS=Mus musculus OX=10090 GN=Aifm1 PE=1 SV=1	10	11	12	18	11	NaN	13	11	14	15	10	11	NaN	9	12	1.06855	0.649694	5	4	0	18	194	612
965	>sp|Q9CQI3|GMFB_MOUSE Glia maturation factor beta OS=Mus musculus OX=10090 GN=Gmfb PE=1 SV=3	9	12	18	12	12	8	8	9	5	7	10	7	8	8	12	0.587302	0.0123764	5	5	0	18	190	142
966	>sp|Q8BGT8|PHIPL_MOUSE Phytanoyl-CoA hydroxylase-interacting protein-like OS=Mus musculus OX=10090 GN=Phyhipl PE=1 SV=1	6	8	8	10	10	5	17	8	16	8	5	5	6	18	7	1.28571	0.366978	5	5	0	18	172	375
967	>sp|Q9Z2H2|RGS6_MOUSE Regulator of G-protein signaling 6 OS=Mus musculus OX=10090 GN=Rgs6 PE=1 SV=2	8	NaN	NaN	18	13	6	6	15	10	7	7	7	8	15	12	0.676923	0.22555	3	5	0	18	170	472
968	>sp|Q2M3X8|PHAR1_MOUSE Phosphatase and actin regulator 1 OS=Mus musculus OX=10090 GN=Phactr1 PE=1 SV=1	7	NaN	17	7	6	11	2	7	7	NaN	3	NaN	16	8	9	0.72973	0.461948	4	4	0	18	149	580
969	>tr|D3Z1S8|D3Z1S8_MOUSE 40S ribosomal protein S5 (Fragment) OS=Mus musculus OX=10090 GN=Rps5 PE=1 SV=1	6	7	NaN	5	18	7	4	5	15	5	8	NaN	4	3	15	0.8	0.623105	4	5	0	18	148	189
970	>sp|Q8CHT1|NGEF_MOUSE Ephexin-1 OS=Mus musculus OX=10090 GN=Ngef PE=1 SV=1	15	16	NaN	14	12	7	11	NaN	14	NaN	13	NaN	NaN	18	9	0.748538	0.129269	4	3	0	18	139	710
971	>tr|A0A140T8J4|A0A140T8J4_MOUSE Heme-binding protein 1 OS=Mus musculus OX=10090 GN=Hebp1 PE=1 SV=1	18	16	NaN	8	NaN	2	6	NaN	12	9	NaN	13	10	8	9	0.517857	0.119207	3	4	0	18	133	190
972	>sp|Q6PCP5|MFF_MOUSE Mitochondrial fission factor OS=Mus musculus OX=10090 GN=Mff PE=1 SV=1	11	5	7	8	NaN	1	NaN	4	NaN	5	7	18	9	8	NaN	0.430108	0.056563	4	3	0	18	128	291
973	>tr|A0A087WQE8|A0A087WQE8_MOUSE Kinesin-like protein KIF1A OS=Mus musculus OX=10090 GN=Kif1a PE=1 SV=1	NaN	18	16	14	NaN	NaN	NaN	NaN	1	1	NaN	6	NaN	17	14	0.0625	0.00209001	3	2	0	18	104	1791
974	>tr|Q3UHT7|Q3UHT7_MOUSE ERC protein 2 OS=Mus musculus OX=10090 GN=Erc2 PE=1 SV=1	NaN	NaN	NaN	NaN	14	NaN	12	14	NaN	NaN	NaN	15	NaN	8	NaN	0.928571	#DIV/0!	1	2	0	18	97	977
975	>sp|Q9Z1P6|NDUA7_MOUSE NADH dehydrogenase [ubiquinone] 1 alpha subcomplex subunit 7 OS=Mus musculus OX=10090 GN=Ndufa7 PE=1 SV=3	8	5	3	18	6	5	3	2	2	2	1	NaN	6	17	1	0.35	0.0893662	5	5	0	18	95	113
976	>sp|P32883-2|RASK_MOUSE Isoform 2B of GTPase KRas OS=Mus musculus OX=10090 GN=Kras	4	8	3	4	18	8	1	2	6	8	3	NaN	1	5	3	0.675676	0.468792	5	5	0	18	81	188
977	>tr|Q91XH5|Q91XH5_MOUSE Sepiapterin reductase OS=Mus musculus OX=10090 GN=Spr PE=1 SV=1	NaN	NaN	17	13	NaN	NaN	NaN	NaN	NaN	NaN	18	NaN	16	NaN	NaN	#DIV/0!	#DIV/0!	2	0	0	18	79	262
978	>sp|P08556|RASN_MOUSE GTPase NRas OS=Mus musculus OX=10090 GN=Nras PE=1 SV=1	7	1	NaN	4	NaN	NaN	6	NaN	18	NaN	NaN	3	4	3	3	3	0.207905	3	2	0	18	73	189
979	>tr|A0A384DV92|A0A384DV92_MOUSE Phosphodiesterase OS=Mus musculus OX=10090 GN=Pde10a PE=1 SV=1	NaN	NaN	15	NaN	15	NaN	NaN	13	NaN	NaN	NaN	NaN	NaN	NaN	NaN	0.866667	#DIV/0!	2	1	0	18	61	850
980	>sp|P20917-2|MAG_MOUSE Isoform S-MAG of Myelin-associated glycoprotein OS=Mus musculus OX=10090 GN=Mag	NaN	NaN	NaN	NaN	NaN	NaN	NaN	11	NaN	13	NaN	NaN	NaN	NaN	NaN	#DIV/0!	#DIV/0!	0	2	0	18	52	582
981	>sp|Q8BHN3-2|GANAB_MOUSE Isoform 2 of Neutral alpha-glucosidase AB OS=Mus musculus OX=10090 GN=Ganab	NaN	18	NaN	NaN	NaN	NaN	17	NaN	NaN	NaN	13	NaN	NaN	NaN	NaN	0.944444	#DIV/0!	1	1	0	18	48	966
982	>tr|D3Z722|D3Z722_MOUSE 40S ribosomal protein S19 OS=Mus musculus OX=10090 GN=Rps19 PE=1 SV=1	NaN	NaN	10	NaN	NaN	NaN	NaN	7	NaN	NaN	NaN	NaN	18	NaN	12	0.7	#DIV/0!	1	1	0	18	47	212
983	>sp|Q8R0S2|IQEC1_MOUSE IQ motif and SEC7 domain-containing protein 1 OS=Mus musculus OX=10090 GN=Iqsec1 PE=1 SV=2	NaN	NaN	NaN	NaN	NaN	NaN	NaN	14	NaN	NaN	NaN	9	NaN	NaN	NaN	#DIV/0!	#DIV/0!	0	1	0	18	41	961
984	>sp|Q9EPN1-4|NBEA_MOUSE Isoform 4 of Neurobeachin OS=Mus musculus OX=10090 GN=Nbea	NaN	NaN	NaN	NaN	NaN	NaN	NaN	NaN	NaN	NaN	NaN	NaN	18	NaN	NaN	#DIV/0!	#DIV/0!	0	0	0	18	18	2931
985	>tr|B7ZNF6|B7ZNF6_MOUSE Catenin delta-2 OS=Mus musculus OX=10090 GN=Ctnnd2 PE=1 SV=1	NaN	NaN	NaN	18	NaN	NaN	NaN	NaN	NaN	NaN	NaN	NaN	NaN	NaN	NaN	#DIV/0!	#DIV/0!	1	0	0	18	18	1221
986	>sp|O88544|CSN4_MOUSE COP9 signalosome complex subunit 4 OS=Mus musculus OX=10090 GN=Cops4 PE=1 SV=1	17	13	11	14	15	14	12	10	16	15	10	11	12	14	13	0.957143	0.6938	5	5	0	17	267	406
987	>sp|Q9QYS2|GRM3_MOUSE Metabotropic glutamate receptor 3 OS=Mus musculus OX=10090 GN=Grm3 PE=1 SV=1	10	15	17	11	11	16	14	17	16	9	10	13	14	10	17	1.125	0.441262	5	5	0	17	253	879
988	>sp|Q8K212|PACS1_MOUSE Phosphofurin acidic cluster sorting protein 1 OS=Mus musculus OX=10090 GN=Pacs1 PE=1 SV=2	8	14	9	17	17	11	13	8	15	7	10	14	12	16	14	0.830769	0.393067	5	5	0	17	251	961
989	>sp|O55126|NIPS2_MOUSE Protein NipSnap homolog 2 OS=Mus musculus OX=10090 GN=Nipsnap2 PE=1 SV=1	13	13	10	12	16	6	15	12	16	15	14	13	8	9	17	1	1	5	5	0	17	248	281
990	>sp|Q99JY0|ECHB_MOUSE Trifunctional enzyme subunit beta, mitochondrial OS=Mus musculus OX=10090 GN=Hadhb PE=1 SV=1	14	14	11	14	5	12	10	10	12	13	11	13	17	11	12	0.982759	0.916542	5	5	0	17	247	475
991	>sp|Q9Z1N5|DX39B_MOUSE Spliceosome RNA helicase Ddx39b OS=Mus musculus OX=10090 GN=Ddx39b PE=1 SV=1	9	11	9	8	12	17	15	16	15	12	13	15	10	15	10	1.53061	0.00160306	5	5	0	17	247	428
992	>sp|P62774|MTPN_MOUSE Myotrophin OS=Mus musculus OX=10090 GN=Mtpn PE=1 SV=2	10	17	12	13	10	9	12	12	15	14	13	13	6	16	15	1	1	5	5	0	17	240	118
993	>sp|Q61937|NPM_MOUSE Nucleophosmin OS=Mus musculus OX=10090 GN=Npm1 PE=1 SV=1	13	12	8	14	11	8	12	10	7	14	12	9	15	11	15	0.87931	0.41898	5	5	0	17	240	292
994	>sp|Q64010|CRK_MOUSE Adapter molecule crk OS=Mus musculus OX=10090 GN=Crk PE=1 SV=1	17	13	11	12	12	13	8	9	10	16	8	11	10	16	11	0.861538	0.346594	5	5	0	17	236	304
995	>sp|P16054|KPCE_MOUSE Protein kinase C epsilon type OS=Mus musculus OX=10090 GN=Prkce PE=1 SV=1	7	10	13	13	11	9	11	15	10	9	7	14	12	17	14	1	1	5	5	0	17	232	737
996	>sp|P49615|CDK5_MOUSE Cyclin-dependent-like kinase 5 OS=Mus musculus OX=10090 GN=Cdk5 PE=1 SV=1	11	16	11	10	10	4	12	17	14	10	9	11	11	13	13	0.982759	0.937036	5	5	0	17	227	292
997	>sp|Q60902|EP15R_MOUSE Epidermal growth factor receptor substrate 15-like 1 OS=Mus musculus OX=10090 GN=Eps15l1 PE=1 SV=3	13	9	11	12	9	13	8	10	10	10	10	10	12	17	9	0.944444	0.610283	5	5	0	17	227	907
998	>sp|Q9CPU4|MGST3_MOUSE Microsomal glutathione S-transferase 3 OS=Mus musculus OX=10090 GN=Mgst3 PE=1 SV=1	10	14	7	10	16	5	17	12	16	11	12	8	15	8	10	1.07018	0.771652	5	5	0	17	226	153
999	>sp|Q61990|PCBP2_MOUSE Poly(rC)-binding protein 2 OS=Mus musculus OX=10090 GN=Pcbp2 PE=1 SV=1	7	8	13	14	13	7	NaN	12	17	12	11	13	16	NaN	16	1.09091	0.693226	5	4	0	17	225	362
1000	>sp|Q8CHP8|PGP_MOUSE Glycerol-3-phosphate phosphatase OS=Mus musculus OX=10090 GN=Pgp PE=1 SV=1	11	12	17	7	11	12	13	16	9	10	5	11	14	15	7	1.03448	0.847593	5	5	0	17	221	321
1001	>sp|P54071|IDHP_MOUSE Isocitrate dehydrogenase [NADP], mitochondrial OS=Mus musculus OX=10090 GN=Idh2 PE=1 SV=3	7	11	13	10	17	6	12	16	10	6	6	11	13	13	12	0.862069	0.543505	5	5	0	17	220	452
1002	>sp|Q9CQH3|NDUB5_MOUSE NADH dehydrogenase [ubiquinone] 1 beta subcomplex subunit 5, mitochondrial OS=Mus musculus OX=10090 GN=Ndufb5 PE=1 SV=1	9	12	16	9	15	6	8	10	14	11	8	15	7	9	10	0.803279	0.263363	5	5	0	17	219	189
1003	>sp|P23242|CXA1_MOUSE Gap junction alpha-1 protein OS=Mus musculus OX=10090 GN=Gja1 PE=1 SV=2	9	12	14	17	14	13	9	8	10	15	6	11	9	16	13	0.833333	0.26959	5	5	0	17	217	382
1004	>sp|Q8VE33|GD1L1_MOUSE Ganglioside-induced differentiation-associated protein 1-like 1 OS=Mus musculus OX=10090 GN=Gdap1l1 PE=1 SV=1	11	10	6	14	13	6	12	9	10	10	11	10	9	12	12	0.87037	0.434831	5	5	0	17	217	370
1005	>sp|O70589|CSKP_MOUSE Peripheral plasma membrane protein CASK OS=Mus musculus OX=10090 GN=Cask PE=1 SV=2	9	11	14	13	10	13	6	10	12	11	6	5	15	17	14	0.912281	0.52991	5	5	0	17	216	926
1006	>sp|Q99PU5|ACBG1_MOUSE Long-chain-fatty-acid--CoA ligase ACSBG1 OS=Mus musculus OX=10090 GN=Acsbg1 PE=1 SV=1	11	8	10	8	15	9	6	12	17	10	8	11	13	10	11	1.03846	0.862475	5	5	0	17	211	721
1007	>sp|P46664|PURA2_MOUSE Adenylosuccinate synthetase isozyme 2 OS=Mus musculus OX=10090 GN=Adss2 PE=1 SV=2	8	13	6	17	10	10	7	8	12	14	11	9	11	11	13	0.944444	0.802415	5	5	0	17	206	456
1008	>sp|Q9CZ30|OLA1_MOUSE Obg-like ATPase 1 OS=Mus musculus OX=10090 GN=Ola1 PE=1 SV=1	8	11	12	8	8	9	8	13	8	6	11	11	9	14	9	0.93617	0.689723	5	5	0	17	205	396
1009	>sp|P70704|AT8A1_MOUSE Phospholipid-transporting ATPase IA OS=Mus musculus OX=10090 GN=Atp8a1 PE=1 SV=2	8	9	7	14	12	6	10	11	10	11	7	10	11	9	17	0.96	0.808887	5	5	0	17	204	1164
1010	>sp|Q5DTL9|S4A10_MOUSE Sodium-driven chloride bicarbonate exchanger OS=Mus musculus OX=10090 GN=Slc4a10 PE=1 SV=2	7	7	7	10	15	8	15	14	17	8	10	NaN	NaN	9	13	1.34783	0.224176	5	5	0	17	204	1118
1011	>sp|P70372|ELAV1_MOUSE ELAV-like protein 1 OS=Mus musculus OX=10090 GN=Elavl1 PE=1 SV=2	8	17	8	9	10	11	9	8	11	11	9	9	12	11	7	0.961538	0.830223	5	5	0	17	203	326
1012	>sp|Q8BH95|ECHM_MOUSE Enoyl-CoA hydratase, mitochondrial OS=Mus musculus OX=10090 GN=Echs1 PE=1 SV=1	7	16	13	17	11	13	7	13	13	5	7	8	6	13	10	0.796875	0.329836	5	5	0	17	201	290
1013	>sp|O54984|GET3_MOUSE ATPase GET3 OS=Mus musculus OX=10090 GN=Get3 PE=1 SV=2	11	14	11	9	7	6	9	10	6	6	15	10	12	17	8	0.711538	0.0733135	5	5	0	17	197	348
1014	>sp|Q60676|PPP5_MOUSE Serine/threonine-protein phosphatase 5 OS=Mus musculus OX=10090 GN=Ppp5c PE=1 SV=3	8	8	9	17	10	12	7	7	13	5	10	10	8	10	8	0.846154	0.506738	5	5	0	17	197	499
1015	>sp|Q9Z0R4|ITSN1_MOUSE Intersectin-1 OS=Mus musculus OX=10090 GN=Itsn1 PE=1 SV=2	17	15	NaN	NaN	16	5	14	16	12	9	10	4	8	14	14	0.7	0.11584	3	5	0	17	197	1714
1016	>sp|Q80VP1|EPN1_MOUSE Epsin-1 OS=Mus musculus OX=10090 GN=Epn1 PE=1 SV=3	13	7	9	9	2	9	4	9	8	10	14	17	17	13	7	1	1	5	5	0	17	196	575
1017	>sp|Q60598|SRC8_MOUSE Src substrate cortactin OS=Mus musculus OX=10090 GN=Cttn PE=1 SV=2	16	9	8	17	10	11	7	5	6	12	9	9	7	7	12	0.683333	0.141911	5	5	0	17	195	546
1018	>sp|Q8R071|IP3KA_MOUSE Inositol-trisphosphate 3-kinase A OS=Mus musculus OX=10090 GN=Itpka PE=1 SV=1	9	17	11	10	9	13	6	12	17	9	6	4	9	6	10	1.01786	0.935297	5	5	0	17	194	459
1019	>sp|Q922Q1|MARC2_MOUSE Mitochondrial amidoxime reducing component 2 OS=Mus musculus OX=10090 GN=Mtarc2 PE=1 SV=1	7	17	10	11	17	4	5	8	12	9	10	6	12	15	12	0.612903	0.0861448	5	5	0	17	194	338
1020	>sp|P62746|RHOB_MOUSE Rho-related GTP-binding protein RhoB OS=Mus musculus OX=10090 GN=Rhob PE=1 SV=1	8	8	7	7	10	7	14	10	7	8	10	10	9	9	10	1.15	0.42521	5	5	0	17	193	196
1021	>sp|P37040|NCPR_MOUSE NADPH--cytochrome P450 reductase OS=Mus musculus OX=10090 GN=Por PE=1 SV=2	9	11	6	NaN	7	2	9	10	12	10	7	11	9	13	13	1.04242	0.877002	4	5	0	17	188	678
1022	>sp|P18572-2|BASI_MOUSE Isoform 2 of Basigin OS=Mus musculus OX=10090 GN=Bsg	14	15	9	9	11	6	9	6	9	NaN	10	7	12	14	17	0.646552	0.0380796	5	4	0	17	187	273
1023	>sp|P97494|GSH1_MOUSE Glutamate--cysteine ligase catalytic subunit OS=Mus musculus OX=10090 GN=Gclc PE=1 SV=4	9	6	11	7	10	8	6	6	17	7	6	13	10	16	12	1.02326	0.932266	5	5	0	17	185	637
1024	>sp|Q921I1|TRFE_MOUSE Serotransferrin OS=Mus musculus OX=10090 GN=Tf PE=1 SV=1	17	6	9	9	8	8	10	8	8	10	13	6	8	12	11	0.897959	0.620915	5	5	0	17	183	697
1025	>sp|P62881-2|GNB5_MOUSE Isoform 2 of Guanine nucleotide-binding protein subunit beta-5 OS=Mus musculus OX=10090 GN=Gnb5	13	17	8	9	11	NaN	9	11	5	6	9	10	8	11	13	0.668103	0.12078	5	4	0	17	182	353
1026	>sp|P63054|PCP4_MOUSE Calmodulin regulator protein PCP4 OS=Mus musculus OX=10090 GN=Pcp4 PE=3 SV=2	15	10	13	11	8	NaN	16	9	10	15	13	NaN	NaN	NaN	9	1.09649	0.610385	5	4	0	17	181	62
1027	>sp|P62196|PRS8_MOUSE 26S proteasome regulatory subunit 8 OS=Mus musculus OX=10090 GN=Psmc5 PE=1 SV=1	11	9	10	11	15	12	4	13	NaN	9	8	9	11	9	7	0.848214	0.448629	5	4	0	17	178	406
1028	>sp|E9Q6P5|TTC7B_MOUSE Tetratricopeptide repeat protein 7B OS=Mus musculus OX=10090 GN=Ttc7b PE=1 SV=1	NaN	14	NaN	10	11	4	10	11	17	8	6	10	14	12	NaN	0.857143	0.593972	3	5	0	17	175	843
1029	>sp|Q01097|NMDE2_MOUSE Glutamate receptor ionotropic, NMDA 2B OS=Mus musculus OX=10090 GN=Grin2b PE=1 SV=3	9	12	9	17	7	9	5	6	10	6	5	4	10	15	5	0.666667	0.108799	5	5	0	17	166	1482
1030	>sp|Q80TR1|AGRL1_MOUSE Adhesion G protein-coupled receptor L1 OS=Mus musculus OX=10090 GN=Adgrl1 PE=1 SV=2	9	12	15	17	13	5	11	NaN	14	13	7	6	8	8	11	0.814394	0.330883	5	4	0	17	161	1466
1031	>sp|Q60631|GRB2_MOUSE Growth factor receptor-bound protein 2 OS=Mus musculus OX=10090 GN=Grb2 PE=1 SV=1	12	7	5	12	9	5	6	6	8	6	5	9	7	6	9	0.688889	0.0919567	5	5	0	17	160	217
1032	>sp|P61027|RAB10_MOUSE Ras-related protein Rab-10 OS=Mus musculus OX=10090 GN=Rab10 PE=1 SV=1	6	8	5	17	8	7	5	5	10	6	6	4	8	8	8	0.75	0.371491	5	5	0	17	148	200
1033	>sp|Q91ZJ5|UGPA_MOUSE UTP--glucose-1-phosphate uridylyltransferase OS=Mus musculus OX=10090 GN=Ugp2 PE=1 SV=3	NaN	14	NaN	1	12	NaN	10	10	12	12	10	16	NaN	NaN	9	1.22222	0.587211	3	4	0	17	147	508
1034	>sp|P48771|CX7A2_MOUSE Cytochrome c oxidase subunit 7A2, mitochondrial OS=Mus musculus OX=10090 GN=Cox7a2 PE=1 SV=2	6	12	6	8	5	7	5	6	10	10	4	3	NaN	17	12	1.02703	0.904711	5	5	0	17	144	83
1035	>tr|A0A571BG95|A0A571BG95_MOUSE Active breakpoint cluster region-related protein OS=Mus musculus OX=10090 GN=Abr PE=1 SV=1	NaN	NaN	14	NaN	NaN	NaN	4	NaN	15	10	6	NaN	13	8	12	0.690476	#DIV/0!	1	3	0	17	134	1185
1036	>sp|P42859|HD_MOUSE Huntingtin OS=Mus musculus OX=10090 GN=Htt PE=1 SV=2	NaN	7	8	NaN	6	NaN	8	9	17	9	7	7	8	6	9	1.53571	0.197987	3	4	0	17	124	3119
1037	>sp|Q9Z204-2|HNRPC_MOUSE Isoform C1 of Heterogeneous nuclear ribonucleoproteins C1/C2 OS=Mus musculus OX=10090 GN=Hnrnpc	11	2	10	NaN	NaN	NaN	17	1	12	10	7	1	1	9	NaN	1.30435	0.634734	3	4	0	17	122	300
1038	>sp|Q3UTJ2-2|SRBS2_MOUSE Isoform 2 of Sorbin and SH3 domain-containing protein 2 OS=Mus musculus OX=10090 GN=Sorbs2	12	NaN	NaN	14	13	4	NaN	NaN	7	NaN	NaN	8	17	8	NaN	0.423077	0.0113544	3	2	0	17	118	1295
1039	>sp|O08585|CLCA_MOUSE Clathrin light chain A OS=Mus musculus OX=10090 GN=Clta PE=1 SV=2	NaN	1	NaN	17	NaN	2	NaN	NaN	NaN	NaN	1	NaN	5	NaN	17	0.222222	#DIV/0!	2	1	0	17	70	235
1040	>sp|A2AN08-3|UBR4_MOUSE Isoform 3 of E3 ubiquitin-protein ligase UBR4 OS=Mus musculus OX=10090 GN=Ubr4	4	NaN	NaN	NaN	NaN	NaN	NaN	NaN	NaN	13	10	9	NaN	NaN	NaN	3.25	#DIV/0!	1	1	0	17	62	5156
1041	>sp|P28740|KIF2A_MOUSE Kinesin-like protein KIF2A OS=Mus musculus OX=10090 GN=Kif2a PE=1 SV=2	NaN	17	NaN	NaN	NaN	NaN	10	NaN	NaN	NaN	12	NaN	NaN	NaN	13	0.588235	#DIV/0!	1	1	0	17	62	705
1042	>sp|P33173|KIF1A_MOUSE Kinesin-like protein KIF1A OS=Mus musculus OX=10090 GN=Kif1a PE=1 SV=2	NaN	NaN	NaN	1	NaN	6	NaN	NaN	17	11	NaN	NaN	9	NaN	NaN	11.3333	#DIV/0!	1	3	0	17	52	1695
1043	>sp|P35279|RAB6A_MOUSE Ras-related protein Rab-6A OS=Mus musculus OX=10090 GN=Rab6a PE=1 SV=4	3	2	1	4	NaN	17	NaN	NaN	4	2	4	2	NaN	1	4	3.06667	0.253743	4	3	0	17	47	208
1044	>tr|B1AU25|B1AU25_MOUSE Apoptosis-inducing factor 1, mitochondrial OS=Mus musculus OX=10090 GN=Aifm1 PE=1 SV=1	NaN	NaN	NaN	NaN	NaN	10	NaN	NaN	NaN	NaN	NaN	NaN	14	NaN	NaN	#DIV/0!	#DIV/0!	0	1	0	17	41	608
1045	>tr|B7ZNL2|B7ZNL2_MOUSE Nap1l4 protein OS=Mus musculus OX=10090 GN=Nap1l4 PE=1 SV=1	NaN	NaN	NaN	17	NaN	NaN	NaN	NaN	NaN	NaN	NaN	NaN	NaN	NaN	NaN	#DIV/0!	#DIV/0!	1	0	0	17	33	386
1046	>tr|D3YZU4|D3YZU4_MOUSE SH3 and multiple ankyrin repeat domains protein 1 OS=Mus musculus OX=10090 GN=Shank1 PE=1 SV=1	NaN	NaN	NaN	NaN	NaN	NaN	NaN	NaN	NaN	NaN	NaN	NaN	NaN	NaN	NaN	#DIV/0!	#DIV/0!	0	0	0	17	32	2159
1047	>sp|Q8CA95-3|PDE10_MOUSE Isoform 3 of cAMP and cAMP-inhibited cGMP 3',5'-cyclic phosphodiesterase 10A OS=Mus musculus OX=10090 GN=Pde10a	NaN	17	NaN	NaN	NaN	NaN	NaN	NaN	NaN	NaN	NaN	NaN	NaN	NaN	10	#DIV/0!	#DIV/0!	1	0	0	17	27	796
1048	>sp|A2ALS5-2|RPGP1_MOUSE Isoform 2 of Rap1 GTPase-activating protein 1 OS=Mus musculus OX=10090 GN=Rap1gap	NaN	NaN	17	NaN	NaN	NaN	NaN	NaN	NaN	NaN	NaN	NaN	NaN	NaN	NaN	#DIV/0!	#DIV/0!	1	0	0	17	17	727
1049	>sp|O35927-2|CTND2_MOUSE Isoform 2 of Catenin delta-2 OS=Mus musculus OX=10090 GN=Ctnnd2	NaN	NaN	NaN	NaN	17	NaN	NaN	NaN	NaN	NaN	NaN	NaN	NaN	NaN	NaN	#DIV/0!	#DIV/0!	1	0	0	17	17	1222
1050	>sp|Q5DTL9-3|S4A10_MOUSE Isoform 3 of Sodium-driven chloride bicarbonate exchanger OS=Mus musculus OX=10090 GN=Slc4a10	NaN	NaN	NaN	NaN	NaN	NaN	NaN	NaN	NaN	NaN	NaN	NaN	17	NaN	NaN	#DIV/0!	#DIV/0!	0	0	0	17	17	1106
1051	>sp|Q9CR84|AT5G1_MOUSE ATP synthase F(0) complex subunit C1, mitochondrial OS=Mus musculus OX=10090 GN=Atp5mc1 PE=1 SV=1	NaN	NaN	NaN	NaN	NaN	NaN	NaN	NaN	NaN	NaN	NaN	NaN	NaN	NaN	17	#DIV/0!	#DIV/0!	0	0	0	17	17	136
1052	>tr|A0A2R8W6P0|A0A2R8W6P0_MOUSE Leukocyte surface antigen CD47 OS=Mus musculus OX=10090 GN=Cd47 PE=1 SV=1	NaN	NaN	NaN	NaN	NaN	NaN	NaN	NaN	NaN	NaN	NaN	NaN	17	NaN	NaN	#DIV/0!	#DIV/0!	0	0	0	17	17	342
1053	>tr|A2AEG6|A2AEG6_MOUSE Neuronal membrane glycoprotein M6-b OS=Mus musculus OX=10090 GN=Gpm6b PE=1 SV=1	NaN	17	NaN	NaN	NaN	NaN	NaN	NaN	NaN	NaN	NaN	NaN	NaN	NaN	NaN	#DIV/0!	#DIV/0!	1	0	0	17	17	328
1054	>tr|F7D432|F7D432_MOUSE Protein-L-isoaspartate O-methyltransferase (Fragment) OS=Mus musculus OX=10090 GN=Pcmt1 PE=1 SV=1	NaN	NaN	NaN	NaN	NaN	NaN	NaN	NaN	NaN	NaN	NaN	17	NaN	NaN	NaN	#DIV/0!	#DIV/0!	0	0	0	17	17	271
1055	>tr|J3QMG3|J3QMG3_MOUSE Voltage-dependent anion-selective channel protein 3 OS=Mus musculus OX=10090 GN=Vdac3 PE=1 SV=1	NaN	NaN	NaN	NaN	NaN	17	NaN	NaN	NaN	NaN	NaN	NaN	NaN	NaN	NaN	#DIV/0!	#DIV/0!	0	1	0	17	17	284
1056	>tr|S4R2Q2|S4R2Q2_MOUSE Ankyrin repeat and sterile alpha motif domain-containing protein 1B OS=Mus musculus OX=10090 GN=Anks1b PE=1 SV=1	NaN	NaN	NaN	NaN	NaN	NaN	NaN	NaN	NaN	NaN	NaN	NaN	NaN	NaN	NaN	#DIV/0!	#DIV/0!	0	0	0	17	17	509
1057	>sp|P31648|SC6A1_MOUSE Sodium- and chloride-dependent GABA transporter 1 OS=Mus musculus OX=10090 GN=Slc6a1 PE=1 SV=2	13	10	9	10	10	10	15	12	11	12	15	16	16	11	14	1.15385	0.175699	5	5	0	16	250	599
1058	>sp|P62823|RAB3C_MOUSE Ras-related protein Rab-3C OS=Mus musculus OX=10090 GN=Rab3c PE=1 SV=1	10	13	15	9	14	7	13	12	10	7	12	16	13	10	16	0.803279	0.195016	5	5	0	16	240	227
1059	>sp|Q9CQF9|PCYOX_MOUSE Prenylcysteine oxidase OS=Mus musculus OX=10090 GN=Pcyox1 PE=1 SV=1	13	13	11	9	13	16	12	12	15	11	15	8	10	12	8	1.11864	0.297715	5	5	0	16	237	505
1060	>sp|P62334|PRS10_MOUSE 26S proteasome regulatory subunit 10B OS=Mus musculus OX=10090 GN=Psmc6 PE=1 SV=1	12	11	7	9	9	12	11	14	12	12	6	15	15	12	11	1.27083	0.0316178	5	5	0	16	235	389
1061	>sp|Q62433|NDRG1_MOUSE Protein NDRG1 OS=Mus musculus OX=10090 GN=Ndrg1 PE=1 SV=1	10	14	15	10	12	6	6	14	12	10	14	14	14	10	14	0.786885	0.207804	5	5	0	16	235	394
1062	>sp|P03911|NU4M_MOUSE NADH-ubiquinone oxidoreductase chain 4 OS=Mus musculus OX=10090 GN=Mtnd4 PE=1 SV=1	12	9	12	7	11	6	11	15	14	10	10	11	12	15	16	1.09804	0.606499	5	5	0	16	231	459
1063	>sp|Q8JZQ2|AFG32_MOUSE AFG3-like protein 2 OS=Mus musculus OX=10090 GN=Afg3l2 PE=1 SV=1	10	16	15	11	12	10	8	10	12	11	12	10	12	11	11	0.796875	0.087156	5	5	0	16	224	802
1064	>sp|Q8BH44|COR2B_MOUSE Coronin-2B OS=Mus musculus OX=10090 GN=Coro2b PE=1 SV=2	8	8	11	10	12	9	8	14	11	8	16	12	12	12	10	1.02041	0.889374	5	5	0	16	223	480
1065	>sp|P42208|SEPT2_MOUSE Septin-2 OS=Mus musculus OX=10090 GN=Septin2 PE=1 SV=2	16	13	12	13	11	9	6	8	12	8	10	10	11	14	14	0.661538	0.00915444	5	5	0	16	222	361
1066	>sp|P61202|CSN2_MOUSE COP9 signalosome complex subunit 2 OS=Mus musculus OX=10090 GN=Cops2 PE=1 SV=1	12	9	14	11	11	6	12	11	14	9	8	12	9	10	13	0.912281	0.5463	5	5	0	16	222	443
1067	>sp|Q8R2R9|AP3M2_MOUSE AP-3 complex subunit mu-2 OS=Mus musculus OX=10090 GN=Ap3m2 PE=1 SV=1	7	13	13	14	16	11	10	10	16	9	11	12	9	11	10	0.888889	0.493081	5	5	0	16	222	418
1068	>sp|Q8R464|CADM4_MOUSE Cell adhesion molecule 4 OS=Mus musculus OX=10090 GN=Cadm4 PE=1 SV=1	14	16	13	14	12	11	13	8	15	10	8	6	8	12	12	0.826087	0.119836	5	5	0	16	222	388
1069	>sp|Q61330|CNTN2_MOUSE Contactin-2 OS=Mus musculus OX=10090 GN=Cntn2 PE=1 SV=2	14	8	15	12	11	6	13	12	11	12	12	7	11	16	6	0.9	0.510757	5	5	0	16	220	1040
1070	>sp|Q6P5E4|UGGG1_MOUSE UDP-glucose:glycoprotein glucosyltransferase 1 OS=Mus musculus OX=10090 GN=Uggt1 PE=1 SV=4	7	13	14	12	9	2	6	13	11	12	8	11	16	7	12	0.8	0.396831	5	5	0	16	219	1551
1071	>sp|P63276|RS17_MOUSE 40S ribosomal protein S17 OS=Mus musculus OX=10090 GN=Rps17 PE=1 SV=2	9	8	10	11	9	10	8	12	11	5	7	12	13	16	7	0.978723	0.885187	5	5	0	16	213	135
1072	>sp|Q99L13|3HIDH_MOUSE 3-hydroxyisobutyrate dehydrogenase, mitochondrial OS=Mus musculus OX=10090 GN=Hibadh PE=1 SV=1	10	10	13	7	14	7	10	11	6	7	8	15	13	10	11	0.759259	0.137344	5	5	0	16	213	335
1073	>sp|Q63912|OMGP_MOUSE Oligodendrocyte-myelin glycoprotein OS=Mus musculus OX=10090 GN=Omg PE=1 SV=1	11	10	13	11	10	16	10	7	12	8	10	10	8	11	6	0.963636	0.818969	5	5	0	16	209	440
1074	>sp|Q6P5F9|XPO1_MOUSE Exportin-1 OS=Mus musculus OX=10090 GN=Xpo1 PE=1 SV=1	9	10	11	10	6	5	5	15	13	7	11	8	15	13	9	0.978261	0.931873	5	5	0	16	209	1071
1075	>tr|Q924B0|Q924B0_MOUSE Inositol-1-monophosphatase OS=Mus musculus OX=10090 GN=Impa1 PE=1 SV=1	10	8	10	12	10	11	9	16	6	10	13	12	12	11	14	1.04	0.824866	5	5	0	16	209	277
1076	>sp|Q921H8|THIKA_MOUSE 3-ketoacyl-CoA thiolase A, peroxisomal OS=Mus musculus OX=10090 GN=Acaa1a PE=1 SV=1	15	11	11	10	9	13	12	5	10	11	9	6	12	16	12	0.910714	0.57834	5	5	0	16	206	424
1077	>sp|Q99LF4|RTCB_MOUSE RNA-splicing ligase RtcB homolog OS=Mus musculus OX=10090 GN=Rtcb PE=1 SV=1	9	16	12	16	11	8	10	8	10	11	5	4	11	10	13	0.734375	0.0552619	5	5	0	16	203	505
1078	>sp|P08414|KCC4_MOUSE Calcium/calmodulin-dependent protein kinase type IV OS=Mus musculus OX=10090 GN=Camk4 PE=1 SV=2	12	16	11	10	10	7	4	10	9	9	10	11	7	9	10	0.661017	0.0319729	5	5	0	16	198	469
1079	>sp|P53810|PIPNA_MOUSE Phosphatidylinositol transfer protein alpha isoform OS=Mus musculus OX=10090 GN=Pitpna PE=1 SV=2	NaN	15	11	16	16	11	1	10	15	NaN	12	13	10	14	13	0.637931	0.150404	4	4	0	16	197	271
1080	>sp|Q8CIE6|COPA_MOUSE Coatomer subunit alpha OS=Mus musculus OX=10090 GN=Copa PE=1 SV=2	8	11	6	10	6	10	12	16	12	9	10	5	14	11	8	1.43902	0.0515858	5	5	0	16	191	1224
1081	>sp|Q9WV69-2|DEMA_MOUSE Isoform 2 of Dematin OS=Mus musculus OX=10090 GN=Dmtn	11	11	16	14	14	11	13	7	7	12	8	10	9	13	NaN	0.757576	0.0795417	5	5	0	16	191	383
1082	>sp|Q9CZD3|GARS_MOUSE Glycine--tRNA ligase OS=Mus musculus OX=10090 GN=Gars1 PE=1 SV=1	8	15	12	16	11	5	7	9	6	11	12	7	7	10	11	0.612903	0.0281461	5	5	0	16	190	729
1083	>sp|Q9JLZ3|AUHM_MOUSE Methylglutaconyl-CoA hydratase, mitochondrial OS=Mus musculus OX=10090 GN=Auh PE=1 SV=1	11	11	5	10	7	8	9	7	16	8	7	12	5	10	10	1.09091	0.703101	5	5	0	16	190	314
1084	>sp|Q9CXW3|CYBP_MOUSE Calcyclin-binding protein OS=Mus musculus OX=10090 GN=Cacybp PE=1 SV=1	13	9	5	16	7	11	11	6	12	6	7	6	8	8	9	0.92	0.747029	5	5	0	16	189	229
1085	>sp|P62843|RS15_MOUSE 40S ribosomal protein S15 OS=Mus musculus OX=10090 GN=Rps15 PE=1 SV=2	13	9	10	8	12	3	6	9	8	12	9	8	9	8	8	0.730769	0.151584	5	5	0	16	188	145
1086	>sp|Q91Z53|GRHPR_MOUSE Glyoxylate reductase/hydroxypyruvate reductase OS=Mus musculus OX=10090 GN=Grhpr PE=1 SV=1	10	10	9	9	12	8	5	6	12	12	8	6	14	11	8	0.86	0.398121	5	5	0	16	185	328
1087	>sp|P14685|PSMD3_MOUSE 26S proteasome non-ATPase regulatory subunit 3 OS=Mus musculus OX=10090 GN=Psmd3 PE=1 SV=3	11	10	7	6	7	10	7	9	16	8	9	7	11	6	14	1.21951	0.360223	5	5	0	16	184	530
1088	>sp|Q9Z1Q9|SYVC_MOUSE Valine--tRNA ligase OS=Mus musculus OX=10090 GN=Vars1 PE=1 SV=1	10	16	11	13	11	3	6	11	11	10	4	4	12	7	11	0.672131	0.0705487	5	5	0	16	184	1263
1089	>sp|P50247|SAHH_MOUSE Adenosylhomocysteinase OS=Mus musculus OX=10090 GN=Ahcy PE=1 SV=3	14	7	6	9	5	11	6	11	10	7	16	10	8	13	5	1.09756	0.68602	5	5	0	16	182	432
1090	>sp|Q80XI4|PI42B_MOUSE Phosphatidylinositol 5-phosphate 4-kinase type-2 beta OS=Mus musculus OX=10090 GN=Pip4k2b PE=1 SV=1	14	16	10	16	10	8	3	3	9	12	6	7	7	15	14	0.530303	0.0235761	5	5	0	16	182	416
1091	>sp|Q9Z1L5|CA2D3_MOUSE Voltage-dependent calcium channel subunit alpha-2/delta-3 OS=Mus musculus OX=10090 GN=Cacna2d3 PE=1 SV=1	9	12	11	8	12	5	7	9	16	11	9	7	8	8	8	0.923077	0.707117	5	5	0	16	182	1091
1092	>sp|Q8R574|KPRB_MOUSE Phosphoribosyl pyrophosphate synthase-associated protein 2 OS=Mus musculus OX=10090 GN=Prpsap2 PE=1 SV=1	11	11	9	16	9	3	7	9	7	12	7	8	10	10	11	0.678571	0.101982	5	5	0	16	181	369
1093	>sp|P70670|NACAM_MOUSE Nascent polypeptide-associated complex subunit alpha, muscle-specific form OS=Mus musculus OX=10090 GN=Naca PE=1 SV=2	7	11	9	9	11	10	8	6	16	10	13	9	8	8	7	1.06383	0.751822	5	5	0	16	176	2187
1094	>sp|O35864|CSN5_MOUSE COP9 signalosome complex subunit 5 OS=Mus musculus OX=10090 GN=Cops5 PE=1 SV=3	7	7	9	10	5	5	7	8	13	5	16	12	10	8	5	1	1	5	5	0	16	174	334
1095	>sp|Q9QY76|VAPB_MOUSE Vesicle-associated membrane protein-associated protein B OS=Mus musculus OX=10090 GN=Vapb PE=1 SV=3	11	13	14	16	13	13	5	6	6	12	6	4	5	NaN	7	0.626866	0.0285826	5	5	0	16	173	243
1096	>sp|A2RT62|FXL16_MOUSE F-box/LRR-repeat protein 16 OS=Mus musculus OX=10090 GN=Fbxl16 PE=1 SV=1	9	13	9	7	11	10	6	9	6	7	10	4	16	9	8	0.77551	0.130022	5	5	0	16	172	479
1097	>sp|Q63844|MK03_MOUSE Mitogen-activated protein kinase 3 OS=Mus musculus OX=10090 GN=Mapk3 PE=1 SV=5	9	10	4	8	12	11	5	7	5	7	13	6	10	10	8	0.813953	0.379588	5	5	0	16	172	380
1098	>sp|Q64737|PUR2_MOUSE Trifunctional purine biosynthetic protein adenosine-3 OS=Mus musculus OX=10090 GN=Gart PE=1 SV=3	5	11	12	16	7	2	4	10	8	14	6	4	13	9	13	0.745098	0.393166	5	5	0	16	170	1010
1099	>sp|Q8BMJ2|SYLC_MOUSE Leucine--tRNA ligase, cytoplasmic OS=Mus musculus OX=10090 GN=Lars1 PE=1 SV=2	7	13	10	7	5	NaN	9	16	6	8	6	12	10	8	9	1.16071	0.60361	5	4	0	16	169	1178
1100	>sp|Q8C0T5|SI1L1_MOUSE Signal-induced proliferation-associated 1-like protein 1 OS=Mus musculus OX=10090 GN=Sipa1l1 PE=1 SV=2	9	9	9	16	7	3	8	11	6	11	7	10	9	13	5	0.78	0.341842	5	5	0	16	169	1782
1101	>sp|P63141|KCNA2_MOUSE Potassium voltage-gated channel subfamily A member 2 OS=Mus musculus OX=10090 GN=Kcna2 PE=1 SV=1	11	4	9	12	4	3	8	8	14	4	7	8	7	14	9	0.925	0.821991	5	5	0	16	166	499
1102	>sp|O88741|GDAP1_MOUSE Ganglioside-induced differentiation-associated protein 1 OS=Mus musculus OX=10090 GN=Gdap1 PE=1 SV=1	5	6	3	10	9	6	6	13	16	7	7	10	7	9	10	1.45455	0.252579	5	5	0	16	165	358
1103	>sp|A2AN08|UBR4_MOUSE E3 ubiquitin-protein ligase UBR4 OS=Mus musculus OX=10090 GN=Ubr4 PE=1 SV=1	NaN	9	9	5	9	5	14	10	11	NaN	NaN	NaN	16	14	10	1.25	0.382175	4	4	0	16	143	5180
1104	>sp|P10605|CATB_MOUSE Cathepsin B OS=Mus musculus OX=10090 GN=Ctsb PE=1 SV=2	3	3	5	7	7	4	7	5	16	3	8	7	9	6	11	1.4	0.448556	5	5	0	16	143	339
1105	>sp|Q6R0H7|GNAS1_MOUSE Guanine nucleotide-binding protein G(s) subunit alpha isoforms XLas OS=Mus musculus OX=10090 GN=Gnas PE=1 SV=1	NaN	16	NaN	12	11	NaN	13	NaN	13	NaN	6	7	12	NaN	12	1	1	3	2	0	16	136	1133
1106	>sp|Q04690|NF1_MOUSE Neurofibromin OS=Mus musculus OX=10090 GN=Nf1 PE=1 SV=1	7	9	NaN	3	4	NaN	6	7	16	4	7	7	11	9	10	1.43478	0.435558	4	4	0	16	128	2841
1107	>sp|Q6ZWR6|SYNE1_MOUSE Nesprin-1 OS=Mus musculus OX=10090 GN=Syne1 PE=1 SV=2	12	NaN	11	9	16	NaN	NaN	NaN	NaN	5	12	11	7	10	7	0.416667	#DIV/0!	4	1	0	16	127	8799
1108	>sp|Q9Z204|HNRPC_MOUSE Heterogeneous nuclear ribonucleoproteins C1/C2 OS=Mus musculus OX=10090 GN=Hnrnpc PE=1 SV=1	NaN	15	NaN	11	15	11	NaN	8	NaN	NaN	NaN	16	10	NaN	8	0.695122	0.135345	3	2	0	16	117	313
1109	>tr|Q6PFA2|Q6PFA2_MOUSE Clathrin light chain OS=Mus musculus OX=10090 GN=Clta PE=1 SV=1	16	1	NaN	1	NaN	16	8	6	NaN	1	8	7	NaN	15	NaN	1.29167	0.766415	3	4	0	16	93	218
1110	>sp|Q91ZJ5-2|UGPA_MOUSE Isoform 2 of UTP--glucose-1-phosphate uridylyltransferase OS=Mus musculus OX=10090 GN=Ugp2	12	NaN	15	14	NaN	16	NaN	NaN	NaN	1	NaN	NaN	11	10	NaN	0.621951	0.431884	3	2	0	16	89	497
1111	>sp|Q5SSL4|ABR_MOUSE Active breakpoint cluster region-related protein OS=Mus musculus OX=10090 GN=Abr PE=1 SV=1	9	14	NaN	15	7	4	NaN	16	NaN	NaN	NaN	11	NaN	NaN	NaN	0.888889	0.80255	4	2	0	16	81	859
1112	>tr|Q8CFX3|Q8CFX3_MOUSE Protocadherin 1 OS=Mus musculus OX=10090 GN=Pcdh1 PE=1 SV=1	2	3	2	2	NaN	2	NaN	1	3	1	10	9	3	3	2	0.777778	0.390259	4	4	0	16	76	1038
1113	>tr|D3YUL8|D3YUL8_MOUSE Inositol polyphosphate-4-phosphatase type I A OS=Mus musculus OX=10090 GN=Inpp4a PE=1 SV=1	NaN	16	NaN	NaN	NaN	NaN	NaN	NaN	15	NaN	7	NaN	NaN	14	NaN	0.9375	#DIV/0!	1	1	0	16	75	972
1114	>sp|P63087|PP1G_MOUSE Serine/threonine-protein phosphatase PP1-gamma catalytic subunit OS=Mus musculus OX=10090 GN=Ppp1cc PE=1 SV=1	1	1	4	2	3	16	1	NaN	3	3	1	2	2	1	2	2.61364	0.289872	5	4	0	16	51	323
1115	>sp|Q9CS84-4|NRX1A_MOUSE Isoform 4a of Neurexin-1 OS=Mus musculus OX=10090 GN=Nrxn1	7	NaN	NaN	NaN	9	NaN	NaN	NaN	NaN	NaN	7	NaN	NaN	NaN	NaN	#DIV/0!	#DIV/0!	2	0	0	16	39	1496
1116	>tr|F8WHQ1|F8WHQ1_MOUSE Tumor protein D52 OS=Mus musculus OX=10090 GN=Tpd52 PE=1 SV=1	8	NaN	NaN	NaN	NaN	NaN	NaN	NaN	NaN	NaN	NaN	NaN	NaN	NaN	NaN	#DIV/0!	#DIV/0!	1	0	0	16	36	247
1117	>sp|Q9EPN1-3|NBEA_MOUSE Isoform 3 of Neurobeachin OS=Mus musculus OX=10090 GN=Nbea	NaN	NaN	NaN	NaN	NaN	NaN	NaN	15	NaN	NaN	NaN	NaN	NaN	NaN	16	#DIV/0!	#DIV/0!	0	1	0	16	31	2904
1118	>sp|P18572|BASI_MOUSE Basigin OS=Mus musculus OX=10090 GN=Bsg PE=1 SV=2	NaN	NaN	NaN	NaN	NaN	NaN	NaN	NaN	NaN	16	NaN	NaN	NaN	NaN	NaN	#DIV/0!	#DIV/0!	0	1	0	16	29	389
1119	>sp|Q9CS84-3|NRX1A_MOUSE Isoform 3a of Neurexin-1 OS=Mus musculus OX=10090 GN=Nrxn1	NaN	NaN	NaN	13	NaN	NaN	NaN	NaN	NaN	NaN	NaN	NaN	NaN	NaN	NaN	#DIV/0!	#DIV/0!	1	0	0	16	29	1499
1120	>sp|Q8CC35|SYNPO_MOUSE Synaptopodin OS=Mus musculus OX=10090 GN=Synpo PE=1 SV=2	NaN	NaN	NaN	NaN	NaN	NaN	NaN	NaN	NaN	NaN	NaN	NaN	NaN	NaN	NaN	#DIV/0!	#DIV/0!	0	0	0	16	16	929
1121	>sp|Q9D394-2|RUFY3_MOUSE Isoform 2 of Protein RUFY3 OS=Mus musculus OX=10090 GN=Rufy3	NaN	NaN	NaN	NaN	NaN	NaN	NaN	NaN	NaN	NaN	16	NaN	NaN	NaN	NaN	#DIV/0!	#DIV/0!	0	0	0	16	16	665
1122	>tr|A0A0R4J0K2|A0A0R4J0K2_MOUSE Cytoskeleton-associated protein 5 OS=Mus musculus OX=10090 GN=Ckap5 PE=1 SV=1	NaN	16	NaN	NaN	NaN	NaN	NaN	NaN	NaN	NaN	NaN	NaN	NaN	NaN	NaN	#DIV/0!	#DIV/0!	1	0	0	16	16	2011
1123	>tr|Q8BH80|Q8BH80_MOUSE Vesicle-associated membrane protein, associated protein B and C OS=Mus musculus OX=10090 GN=Vapb PE=1 SV=1	NaN	NaN	NaN	NaN	NaN	NaN	NaN	NaN	NaN	NaN	NaN	NaN	NaN	16	NaN	#DIV/0!	#DIV/0!	0	0	0	16	16	243
1124	>sp|Q9WUK2|IF4H_MOUSE Eukaryotic translation initiation factor 4H OS=Mus musculus OX=10090 GN=Eif4h PE=1 SV=3	14	10	12	14	10	13	13	13	12	14	11	7	11	14	13	1.08333	0.322633	5	5	0	15	243	248
1125	>sp|Q9CXZ1|NDUS4_MOUSE NADH dehydrogenase [ubiquinone] iron-sulfur protein 4, mitochondrial OS=Mus musculus OX=10090 GN=Ndufs4 PE=1 SV=3	15	15	9	11	15	10	9	11	15	11	12	14	8	15	12	0.861538	0.300131	5	5	0	15	242	175
1126	>sp|Q9JMH6|TRXR1_MOUSE Thioredoxin reductase 1, cytoplasmic OS=Mus musculus OX=10090 GN=Txnrd1 PE=1 SV=3	13	8	10	11	7	15	11	14	12	14	9	12	10	15	14	1.34694	0.0305006	5	5	0	15	235	613
1127	>sp|Q8K4Z3|NNRE_MOUSE NAD(P)H-hydrate epimerase OS=Mus musculus OX=10090 GN=Naxe PE=1 SV=1	13	10	7	11	11	11	15	11	14	11	14	9	11	9	13	1.19231	0.165772	5	5	0	15	231	282
1128	>sp|Q9WTP7|KAD3_MOUSE GTP:AMP phosphotransferase AK3, mitochondrial OS=Mus musculus OX=10090 GN=Ak3 PE=1 SV=3	13	10	10	10	9	13	8	6	11	12	13	9	12	10	12	0.961538	0.792387	5	5	0	15	222	227
1129	>sp|Q9ESW4|AGK_MOUSE Acylglycerol kinase, mitochondrial OS=Mus musculus OX=10090 GN=Agk PE=1 SV=1	10	14	9	11	15	10	11	9	11	11	10	14	10	8	8	0.881356	0.286051	5	5	0	15	220	421
1130	>sp|Q60749|KHDR1_MOUSE KH domain-containing, RNA-binding, signal transduction-associated protein 1 OS=Mus musculus OX=10090 GN=Khdrbs1 PE=1 SV=2	14	8	9	11	14	6	11	10	11	12	7	9	9	9	11	0.892857	0.481284	5	5	0	15	216	443
1131	>sp|Q8C854|MYEF2_MOUSE Myelin expression factor 2 OS=Mus musculus OX=10090 GN=Myef2 PE=1 SV=1	NaN	15	13	10	10	9	13	10	13	13	13	15	13	14	8	0.966667	0.792141	4	5	0	15	216	591
1132	>sp|P00493|HPRT_MOUSE Hypoxanthine-guanine phosphoribosyltransferase OS=Mus musculus OX=10090 GN=Hprt1 PE=1 SV=3	5	13	6	10	13	12	9	9	13	8	15	11	11	7	10	1.08511	0.69229	5	5	0	15	215	218
1133	>sp|P10922|H10_MOUSE Histone H1.0 OS=Mus musculus OX=10090 GN=H1-0 PE=2 SV=4	13	7	14	11	11	9	11	11	11	12	15	12	12	13	10	0.964286	0.765504	5	5	0	15	215	194
1134	>sp|P99026|PSB4_MOUSE Proteasome subunit beta type-4 OS=Mus musculus OX=10090 GN=Psmb4 PE=1 SV=1	8	9	9	10	8	12	11	15	10	9	13	10	13	10	9	1.29545	0.0450024	5	5	0	15	212	264
1135	>sp|P25444|RS2_MOUSE 40S ribosomal protein S2 OS=Mus musculus OX=10090 GN=Rps2 PE=1 SV=3	12	10	10	15	13	15	11	6	11	13	9	11	8	13	8	0.933333	0.663641	5	5	0	15	210	293
1136	>sp|Q62418|DBNL_MOUSE Drebrin-like protein OS=Mus musculus OX=10090 GN=Dbnl PE=1 SV=2	15	8	9	12	6	14	11	9	15	9	11	11	9	10	10	1.16	0.450067	5	5	0	15	210	436
1137	>sp|Q8VBV7|CSN8_MOUSE COP9 signalosome complex subunit 8 OS=Mus musculus OX=10090 GN=Cops8 PE=1 SV=1	13	13	9	12	14	6	8	11	5	6	9	9	14	12	8	0.590164	0.00652613	5	5	0	15	210	209
1138	>sp|P35293|RAB18_MOUSE Ras-related protein Rab-18 OS=Mus musculus OX=10090 GN=Rab18 PE=1 SV=2	12	9	8	10	8	5	14	15	8	7	15	14	8	14	14	1.04255	0.855132	5	5	0	15	208	206
1139	>sp|P45376|ALDR_MOUSE Aldo-keto reductase family 1 member B1 OS=Mus musculus OX=10090 GN=Akr1b1 PE=1 SV=3	13	10	15	10	12	10	9	11	12	7	11	8	11	13	13	0.816667	0.124138	5	5	0	15	208	316
1140	>sp|Q61792|LASP1_MOUSE LIM and SH3 domain protein 1 OS=Mus musculus OX=10090 GN=Lasp1 PE=1 SV=1	14	11	11	13	7	15	11	9	14	13	9	13	3	12	7	1.10714	0.478038	5	5	0	15	207	263
1141	>sp|Q9Z2U0|PSA7_MOUSE Proteasome subunit alpha type-7 OS=Mus musculus OX=10090 GN=Psma7 PE=1 SV=1	12	14	5	10	9	11	10	6	15	11	10	6	6	10	14	1.06	0.781149	5	5	0	15	207	248
1142	>tr|A0A498WGM0|A0A498WGM0_MOUSE Synaptotagmin-7 OS=Mus musculus OX=10090 GN=Syt7 PE=1 SV=1	15	11	8	8	11	10	9	13	10	10	13	12	11	NaN	13	0.981132	0.89414	5	5	0	15	206	687
1143	>sp|Q61425|HCDH_MOUSE Hydroxyacyl-coenzyme A dehydrogenase, mitochondrial OS=Mus musculus OX=10090 GN=Hadh PE=1 SV=2	11	11	12	9	10	4	8	11	9	15	12	12	14	12	11	0.886792	0.54031	5	5	0	15	203	314
1144	>sp|P13020|GELS_MOUSE Gelsolin OS=Mus musculus OX=10090 GN=Gsn PE=1 SV=3	11	13	9	13	7	6	8	9	7	15	9	8	10	11	12	0.849057	0.438995	5	5	0	15	201	780
1145	>sp|Q921F2|TADBP_MOUSE TAR DNA-binding protein 43 OS=Mus musculus OX=10090 GN=Tardbp PE=1 SV=1	7	15	12	9	11	5	11	12	11	11	10	6	9	9	9	0.925926	0.677615	5	5	0	15	201	414
1146	>sp|Q9DC70|NDUS7_MOUSE NADH dehydrogenase [ubiquinone] iron-sulfur protein 7, mitochondrial OS=Mus musculus OX=10090 GN=Ndufs7 PE=1 SV=1	9	11	6	14	15	8	13	7	15	11	11	6	10	9	14	0.981818	0.930512	5	5	0	15	201	224
1147	>sp|Q8K2C9|HACD3_MOUSE Very-long-chain (3R)-3-hydroxyacyl-CoA dehydratase 3 OS=Mus musculus OX=10090 GN=Hacd3 PE=1 SV=2	10	10	7	10	8	5	9	15	10	10	14	9	10	7	12	1.08889	0.65325	5	5	0	15	200	362
1148	>sp|P58389|PTPA_MOUSE Serine/threonine-protein phosphatase 2A activator OS=Mus musculus OX=10090 GN=Ptpa PE=1 SV=1	7	7	10	10	8	9	10	9	12	10	15	7	8	9	14	1.19048	0.103786	5	5	0	15	199	323
1149	>sp|Q01405|SC23A_MOUSE Protein transport protein Sec23A OS=Mus musculus OX=10090 GN=Sec23a PE=1 SV=2	6	9	8	8	12	9	11	12	15	12	6	7	15	9	7	1.37209	0.0488032	5	5	0	15	199	765
1150	>sp|P56695|WFS1_MOUSE Wolframin OS=Mus musculus OX=10090 GN=Wfs1 PE=1 SV=1	11	9	9	11	9	8	4	5	15	7	7	6	12	11	15	0.795918	0.345453	5	5	0	15	196	890
1151	>sp|Q6NXK7|DPP10_MOUSE Inactive dipeptidyl peptidase 10 OS=Mus musculus OX=10090 GN=Dpp10 PE=1 SV=1	11	11	8	13	10	8	11	NaN	13	5	9	13	10	9	11	0.872642	0.475797	5	4	0	15	196	797
1152	>sp|Q3U0V1|FUBP2_MOUSE Far upstream element-binding protein 2 OS=Mus musculus OX=10090 GN=Khsrp PE=1 SV=2	10	15	13	13	10	14	8	8	9	12	4	6	9	14	6	0.836066	0.230979	5	5	0	15	194	748
1153	>sp|Q9QUM9|PSA6_MOUSE Proteasome subunit alpha type-6 OS=Mus musculus OX=10090 GN=Psma6 PE=1 SV=1	12	10	8	15	6	13	5	6	10	6	10	5	13	14	8	0.784314	0.341842	5	5	0	15	194	246
1154	>sp|Q9QUR7|PIN1_MOUSE Peptidyl-prolyl cis-trans isomerase NIMA-interacting 1 OS=Mus musculus OX=10090 GN=Pin1 PE=1 SV=1	9	10	14	13	11	10	8	9	15	9	7	8	10	6	5	0.894737	0.460856	5	5	0	15	193	165
1155	>sp|Q8C1A5|THOP1_MOUSE Thimet oligopeptidase OS=Mus musculus OX=10090 GN=Thop1 PE=1 SV=1	12	9	8	7	10	11	9	9	15	9	7	9	7	12	14	1.15217	0.362291	5	5	0	15	189	687
1156	>sp|Q62283|TSN7_MOUSE Tetraspanin-7 OS=Mus musculus OX=10090 GN=Tspan7 PE=1 SV=2	11	9	15	3	15	1	10	13	6	15	7	5	9	3	13	0.849057	0.646246	5	5	0	15	188	249
1157	>sp|Q6PDL0|DC1L2_MOUSE Cytoplasmic dynein 1 light intermediate chain 2 OS=Mus musculus OX=10090 GN=Dync1li2 PE=1 SV=2	14	10	4	15	8	9	NaN	9	11	7	9	12	10	11	12	0.882353	0.630904	5	4	0	15	188	492
1158	>sp|P28271|ACOC_MOUSE Cytoplasmic aconitate hydratase OS=Mus musculus OX=10090 GN=Aco1 PE=1 SV=3	12	9	10	11	9	4	7	11	6	5	10	10	8	6	8	0.647059	0.0277844	5	5	0	15	187	889
1159	>sp|Q9D7G0|PRPS1_MOUSE Ribose-phosphate pyrophosphokinase 1 OS=Mus musculus OX=10090 GN=Prps1 PE=1 SV=4	NaN	14	7	12	13	NaN	11	13	15	11	8	9	9	10	12	1.08696	0.603645	4	4	0	15	184	318
1160	>sp|P52503|NDUS6_MOUSE NADH dehydrogenase [ubiquinone] iron-sulfur protein 6, mitochondrial OS=Mus musculus OX=10090 GN=Ndufs6 PE=1 SV=2	15	8	11	12	10	12	8	9	10	7	8	4	7	13	7	0.821429	0.202934	5	5	0	15	182	116
1161	>sp|P35235|PTN11_MOUSE Tyrosine-protein phosphatase non-receptor type 11 OS=Mus musculus OX=10090 GN=Ptpn11 PE=1 SV=3	13	15	8	10	8	8	6	9	4	12	10	7	12	10	10	0.722222	0.161397	5	5	0	15	181	593
1162	>sp|Q00PI9|HNRL2_MOUSE Heterogeneous nuclear ribonucleoprotein U-like protein 2 OS=Mus musculus OX=10090 GN=Hnrnpul2 PE=1 SV=2	15	10	8	10	11	11	8	9	7	13	9	9	4	10	7	0.888889	0.469653	5	5	0	15	181	745
1163	>sp|Q3ULD5|MCCB_MOUSE Methylcrotonoyl-CoA carboxylase beta chain, mitochondrial OS=Mus musculus OX=10090 GN=Mccc2 PE=1 SV=1	10	10	11	7	10	6	10	8	6	6	6	11	15	11	8	0.75	0.0514002	5	5	0	15	180	563
1164	>sp|Q9D892|ITPA_MOUSE Inosine triphosphate pyrophosphatase OS=Mus musculus OX=10090 GN=Itpa PE=1 SV=2	6	9	7	5	11	5	7	15	6	9	12	8	11	12	10	1.10526	0.710342	5	5	0	15	180	198
1165	>sp|Q9D394|RUFY3_MOUSE Protein RUFY3 OS=Mus musculus OX=10090 GN=Rufy3 PE=1 SV=1	5	7	9	10	12	NaN	11	14	9	7	NaN	10	10	8	12	1.19186	0.413129	5	4	0	15	179	469
1166	>sp|Q8K3J1|NDUS8_MOUSE NADH dehydrogenase [ubiquinone] iron-sulfur protein 8, mitochondrial OS=Mus musculus OX=10090 GN=Ndufs8 PE=1 SV=1	9	7	8	10	6	7	8	11	6	6	9	7	10	5	11	0.95	0.740439	5	5	0	15	178	212
1167	>sp|Q9CXY6|ILF2_MOUSE Interleukin enhancer-binding factor 2 OS=Mus musculus OX=10090 GN=Ilf2 PE=1 SV=1	9	13	11	9	10	15	7	9	8	11	8	6	8	8	10	0.961538	0.808887	5	5	0	15	178	390
1168	>sp|P10518|HEM2_MOUSE Delta-aminolevulinic acid dehydratase OS=Mus musculus OX=10090 GN=Alad PE=1 SV=1	14	9	10	8	15	6	6	13	11	5	8	5	10	10	4	0.732143	0.194124	5	5	0	15	176	330
1169	>sp|P84309|ADCY5_MOUSE Adenylate cyclase type 5 OS=Mus musculus OX=10090 GN=Adcy5 PE=1 SV=2	NaN	13	14	12	12	7	4	NaN	12	15	8	7	11	13	NaN	0.745098	0.243385	4	4	0	15	175	1262
1170	>sp|Q7TMY8|HUWE1_MOUSE E3 ubiquitin-protein ligase HUWE1 OS=Mus musculus OX=10090 GN=Huwe1 PE=1 SV=5	10	7	10	12	11	6	NaN	6	13	8	10	10	10	5	15	0.825	0.346366	5	4	0	15	173	4377
1171	>sp|Q6PDM2|SRSF1_MOUSE Serine/arginine-rich splicing factor 1 OS=Mus musculus OX=10090 GN=Srsf1 PE=1 SV=3	7	11	6	10	8	11	6	10	7	10	5	9	10	15	9	1.04762	0.773191	5	5	0	15	172	248
1172	>sp|Q99NE5|RIMS1_MOUSE Regulating synaptic membrane exocytosis protein 1 OS=Mus musculus OX=10090 GN=Rims1 PE=1 SV=2	14	12	6	10	9	4	12	NaN	8	7	4	14	10	11	15	0.759804	0.284586	5	4	0	15	171	1463
1173	>sp|P54728|RD23B_MOUSE UV excision repair protein RAD23 homolog B OS=Mus musculus OX=10090 GN=Rad23b PE=1 SV=2	11	15	7	7	8	11	7	6	9	7	4	7	6	7	12	0.833333	0.394369	5	5	0	15	169	416
1174	>sp|P61226|RAP2B_MOUSE Ras-related protein Rap-2b OS=Mus musculus OX=10090 GN=Rap2b PE=1 SV=1	5	10	11	9	4	4	5	11	4	4	15	10	6	9	11	0.717949	0.291781	5	5	0	15	169	183
1175	>tr|A0A5F8MP75|A0A5F8MP75_MOUSE Mitogen-activated protein kinase OS=Mus musculus OX=10090 GN=Mapk10 PE=1 SV=1	9	7	8	10	9	7	9	10	11	10	10	7	NaN	15	9	1.09302	0.373375	5	5	0	15	169	478
1176	>sp|Q8JZS0|LIN7A_MOUSE Protein lin-7 homolog A OS=Mus musculus OX=10090 GN=Lin7a PE=1 SV=2	13	15	11	9	6	5	4	10	11	4	3	6	8	7	5	0.62963	0.104708	5	5	0	15	165	233
1177	>sp|E9PUL5|PRRT2_MOUSE Proline-rich transmembrane protein 2 OS=Mus musculus OX=10090 GN=Prrt2 PE=1 SV=1	7	5	12	5	8	15	8	8	9	4	8	10	7	9	6	1.18919	0.540677	5	5	0	15	161	346
1178	>sp|O88441|MTX2_MOUSE Metaxin-2 OS=Mus musculus OX=10090 GN=Mtx2 PE=1 SV=1	6	4	4	9	8	2	9	6	12	7	9	5	10	6	11	1.16129	0.620915	5	5	0	15	160	263
1179	>sp|Q9R1V7|ADA23_MOUSE Disintegrin and metalloproteinase domain-containing protein 23 OS=Mus musculus OX=10090 GN=Adam23 PE=1 SV=1	13	15	12	12	10	NaN	7	9	10	9	5	NaN	10	8	NaN	0.705645	0.0114761	5	4	0	15	159	829
1180	>sp|Q3THW5|H2AV_MOUSE Histone H2A.V OS=Mus musculus OX=10090 GN=H2az2 PE=1 SV=3	8	11	4	12	12	5	6	3	5	9	5	4	8	5	8	0.595745	0.0705074	5	5	0	15	154	128
1181	>sp|Q9EPL8|IPO7_MOUSE Importin-7 OS=Mus musculus OX=10090 GN=Ipo7 PE=1 SV=2	4	7	11	7	9	1	12	12	15	8	5	9	11	7	9	1.26316	0.477972	5	5	0	15	154	1038
1182	>sp|Q8BP92|RCN2_MOUSE Reticulocalbin-2 OS=Mus musculus OX=10090 GN=Rcn2 PE=1 SV=1	10	3	8	5	5	4	9	4	6	10	4	6	9	5	6	1.06452	0.825978	5	5	0	15	147	320
1183	>sp|Q71M36-2|CSPG5_MOUSE Isoform 2 of Chondroitin sulfate proteoglycan 5 OS=Mus musculus OX=10090 GN=Cspg5	8	12	11	15	2	2	2	2	10	9	7	5	15	8	1	0.520833	0.148145	5	5	0	15	141	539
1184	>sp|Q9CS84|NRX1A_MOUSE Neurexin-1 OS=Mus musculus OX=10090 GN=Nrxn1 PE=1 SV=3	NaN	12	NaN	NaN	NaN	10	13	10	11	9	NaN	6	NaN	12	12	0.883333	#DIV/0!	1	5	0	15	137	1514
1185	>sp|P50544|ACADV_MOUSE Very long-chain specific acyl-CoA dehydrogenase, mitochondrial OS=Mus musculus OX=10090 GN=Acadvl PE=1 SV=3	7	9	8	8	5	8	3	6	15	6	7	9	5	8	7	1.02703	0.927365	5	5	0	15	133	656
1186	>sp|Q9JKB1|UCHL3_MOUSE Ubiquitin carboxyl-terminal hydrolase isozyme L3 OS=Mus musculus OX=10090 GN=Uchl3 PE=1 SV=2	9	10	7	7	9	8	11	7	9	5	7	NaN	NaN	15	7	0.952381	0.740439	5	5	0	15	124	230
1187	>sp|Q6ZPQ6|PITM2_MOUSE Membrane-associated phosphatidylinositol transfer protein 2 OS=Mus musculus OX=10090 GN=Pitpnm2 PE=1 SV=2	6	11	NaN	9	12	4	15	7	5	NaN	6	NaN	11	7	10	0.815789	0.558346	4	4	0	15	118	1335
1188	>tr|E9Q1T1|E9Q1T1_MOUSE Calcium/calmodulin-dependent protein kinase type II subunit delta OS=Mus musculus OX=10090 GN=Camk2d PE=1 SV=1	7	5	15	11	NaN	NaN	6	10	9	13	11	10	NaN	NaN	6	1	1	4	4	0	15	118	533
1189	>sp|Q9JLB0|MPP6_MOUSE MAGUK p55 subfamily member 6 OS=Mus musculus OX=10090 GN=Mpp6 PE=1 SV=1	NaN	NaN	NaN	NaN	NaN	7	8	5	15	NaN	NaN	3	NaN	NaN	7	#DIV/0!	#DIV/0!	0	4	0	15	102	553
1190	>tr|E9Q9G6|E9Q9G6_MOUSE Kinesin-like protein KIF1A OS=Mus musculus OX=10090 GN=Kif1a PE=1 SV=1	10	NaN	NaN	NaN	12	NaN	9	14	NaN	NaN	10	NaN	NaN	NaN	NaN	1.04545	0.869811	2	2	0	15	78	1698
1191	>sp|Q7TNC6|KI26B_MOUSE Kinesin-like protein KIF26B OS=Mus musculus OX=10090 GN=Kif26b PE=1 SV=3	NaN	NaN	NaN	NaN	10	NaN	NaN	NaN	NaN	11	15	14	NaN	14	NaN	1.1	#DIV/0!	1	1	0	15	71	2112
1192	>tr|B7ZCF1|B7ZCF1_MOUSE 26S proteasome regulatory subunit 6A OS=Mus musculus OX=10090 GN=Psmc3 PE=1 SV=1	NaN	NaN	NaN	NaN	15	NaN	NaN	NaN	14	NaN	NaN	NaN	NaN	NaN	14	0.933333	#DIV/0!	1	1	0	15	57	451
1193	>tr|Q0VF55|Q0VF55_MOUSE Calcium-transporting ATPase OS=Mus musculus OX=10090 GN=Atp2b3 PE=1 SV=1	15	NaN	NaN	NaN	NaN	NaN	NaN	NaN	NaN	NaN	14	NaN	NaN	NaN	NaN	#DIV/0!	#DIV/0!	1	0	0	15	43	1220
1194	>tr|A0A1L1STC6|A0A1L1STC6_MOUSE Nesprin-1 OS=Mus musculus OX=10090 GN=Syne1 PE=1 SV=1	NaN	13	NaN	NaN	NaN	NaN	NaN	15	NaN	NaN	NaN	NaN	NaN	NaN	NaN	1.15385	#DIV/0!	1	1	0	15	42	8799
1195	>tr|F8SLQ1|F8SLQ1_MOUSE PEX5-related protein OS=Mus musculus OX=10090 GN=Pex5l PE=1 SV=1	NaN	NaN	9	NaN	8	NaN	NaN	NaN	NaN	15	NaN	NaN	NaN	NaN	NaN	1.76471	#DIV/0!	2	1	0	15	42	650
1196	>tr|A0A2I3BPT1|A0A2I3BPT1_MOUSE Amyloid-beta A4 protein OS=Mus musculus OX=10090 GN=App PE=1 SV=1	NaN	7	NaN	NaN	NaN	NaN	NaN	NaN	15	NaN	NaN	NaN	11	NaN	NaN	2.14286	#DIV/0!	1	1	0	15	33	733
1197	>tr|Q3UY21|Q3UY21_MOUSE Myelin-oligodendrocyte glycoprotein OS=Mus musculus OX=10090 GN=Mog PE=1 SV=1	NaN	NaN	NaN	NaN	NaN	14	NaN	NaN	NaN	NaN	NaN	NaN	NaN	NaN	NaN	#DIV/0!	#DIV/0!	0	1	0	15	29	247
1198	>tr|B2M1R7|B2M1R7_MOUSE Poly(rC)-binding protein 2 OS=Mus musculus OX=10090 GN=Pcbp2 PE=1 SV=1	NaN	NaN	1	NaN	NaN	NaN	15	NaN	NaN	NaN	NaN	NaN	1	10	NaN	15	#DIV/0!	1	1	0	15	27	361
1199	>sp|Q9R1V7-2|ADA23_MOUSE Isoform Beta of Disintegrin and metalloproteinase domain-containing protein 23 OS=Mus musculus OX=10090 GN=Adam23	NaN	NaN	NaN	NaN	NaN	4	NaN	NaN	NaN	NaN	NaN	6	NaN	NaN	NaN	#DIV/0!	#DIV/0!	0	1	0	15	25	829
1200	>sp|Q3TDK6-2|ROGDI_MOUSE Isoform 2 of Protein rogdi homolog OS=Mus musculus OX=10090 GN=Rogdi	9	15	NaN	NaN	NaN	NaN	NaN	NaN	NaN	NaN	NaN	NaN	NaN	NaN	NaN	#DIV/0!	#DIV/0!	2	0	0	15	24	309
1201	>tr|A0A0U1RNP5|A0A0U1RNP5_MOUSE Electron transfer flavoprotein subunit beta (Fragment) OS=Mus musculus OX=10090 GN=Etfb PE=4 SV=1	NaN	NaN	NaN	NaN	NaN	NaN	NaN	NaN	NaN	NaN	NaN	NaN	NaN	NaN	NaN	#DIV/0!	#DIV/0!	0	0	0	15	15	213
1202	>tr|A0A1D5RM83|A0A1D5RM83_MOUSE IQ motif and SEC7 domain-containing protein 1 OS=Mus musculus OX=10090 GN=Iqsec1 PE=1 SV=1	NaN	NaN	NaN	NaN	NaN	15	NaN	NaN	NaN	NaN	NaN	NaN	NaN	NaN	NaN	#DIV/0!	#DIV/0!	0	1	0	15	15	1051
1203	>tr|A2AGQ5|A2AGQ5_MOUSE MAP kinase-activating death domain protein OS=Mus musculus OX=10090 GN=Madd PE=1 SV=1	NaN	NaN	NaN	NaN	NaN	NaN	NaN	NaN	15	NaN	NaN	NaN	NaN	NaN	NaN	#DIV/0!	#DIV/0!	0	1	0	15	15	1593
1204	>tr|A2AP32|A2AP32_MOUSE NADH dehydrogenase [ubiquinone] 1 beta subcomplex subunit 6 OS=Mus musculus OX=10090 GN=Ndufb6 PE=1 SV=1	NaN	NaN	NaN	NaN	NaN	15	NaN	NaN	NaN	NaN	NaN	NaN	NaN	NaN	NaN	#DIV/0!	#DIV/0!	0	1	0	15	15	97
1205	>tr|A2BEE9|A2BEE9_MOUSE Disks large homolog 3 OS=Mus musculus OX=10090 GN=Dlg3 PE=1 SV=1	NaN	NaN	NaN	15	NaN	NaN	NaN	NaN	NaN	NaN	NaN	NaN	NaN	NaN	NaN	#DIV/0!	#DIV/0!	1	0	0	15	15	835
1206	>tr|F7BNZ5|F7BNZ5_MOUSE Breast carcinoma-amplified sequence 1 homolog (Fragment) OS=Mus musculus OX=10090 GN=Bcas1 PE=1 SV=1	NaN	NaN	15	NaN	NaN	NaN	NaN	NaN	NaN	NaN	NaN	NaN	NaN	NaN	NaN	#DIV/0!	#DIV/0!	1	0	0	15	15	379
1207	>sp|Q8BK64|AHSA1_MOUSE Activator of 90 kDa heat shock protein ATPase homolog 1 OS=Mus musculus OX=10090 GN=Ahsa1 PE=1 SV=2	10	11	9	14	10	14	9	10	7	10	9	13	9	11	9	0.925926	0.590738	5	5	0	14	209	338
1208	>sp|P99028|QCR6_MOUSE Cytochrome b-c1 complex subunit 6, mitochondrial OS=Mus musculus OX=10090 GN=Uqcrh PE=1 SV=2	7	9	11	8	11	13	11	13	10	7	14	14	8	11	10	1.17391	0.276846	5	5	0	14	208	89
1209	>sp|Q8JZP2|SYN3_MOUSE Synapsin-3 OS=Mus musculus OX=10090 GN=Syn3 PE=1 SV=2	13	9	9	10	11	6	6	8	14	14	9	6	7	13	13	0.923077	0.696754	5	5	0	14	202	579
1210	>sp|P70441|NHRF1_MOUSE Na(+)/H(+) exchange regulatory cofactor NHE-RF1 OS=Mus musculus OX=10090 GN=Slc9a3r1 PE=1 SV=3	9	8	9	14	9	14	7	8	11	8	7	8	9	13	14	0.979592	0.907808	5	5	0	14	200	355
1211	>sp|Q8C163|EXOG_MOUSE Nuclease EXOG, mitochondrial OS=Mus musculus OX=10090 GN=Exog PE=1 SV=1	7	14	7	9	10	12	8	13	12	9	10	7	11	11	13	1.14894	0.41055	5	5	0	14	200	368
1212	>sp|Q9JLV5|CUL3_MOUSE Cullin-3 OS=Mus musculus OX=10090 GN=Cul3 PE=1 SV=1	5	9	11	10	13	8	7	9	12	9	11	9	13	11	14	0.9375	0.712019	5	5	0	14	200	768
1213	>sp|Q3THK7|GUAA_MOUSE GMP synthase [glutamine-hydrolyzing] OS=Mus musculus OX=10090 GN=Gmps PE=1 SV=2	5	12	7	11	11	5	11	12	8	13	12	10	11	7	10	1.06522	0.771271	5	5	0	14	197	693
1214	>sp|Q99JF8|PSIP1_MOUSE PC4 and SFRS1-interacting protein OS=Mus musculus OX=10090 GN=Psip1 PE=1 SV=1	10	12	NaN	14	8	8	4	10	9	14	13	8	9	12	9	0.818182	0.383505	4	5	0	14	197	528
1215	>sp|P63028|TCTP_MOUSE Translationally-controlled tumor protein OS=Mus musculus OX=10090 GN=Tpt1 PE=1 SV=1	10	12	13	6	14	10	9	11	6	6	9	6	9	14	7	0.763636	0.175503	5	5	0	14	196	172
1216	>sp|Q80UG5-3|SEPT9_MOUSE Isoform 3 of Septin-9 OS=Mus musculus OX=10090 GN=Septin9	11	13	12	14	NaN	12	8	13	9	10	8	8	10	11	7	0.832	0.122182	4	5	0	14	196	576
1217	>sp|P46471|PRS7_MOUSE 26S proteasome regulatory subunit 7 OS=Mus musculus OX=10090 GN=Psmc2 PE=1 SV=5	13	8	13	14	12	10	8	8	11	7	7	6	7	14	5	0.733333	0.0370123	5	5	0	14	192	433
1218	>sp|Q9D7X3|DUS3_MOUSE Dual specificity protein phosphatase 3 OS=Mus musculus OX=10090 GN=Dusp3 PE=1 SV=1	10	12	11	10	9	11	9	11	10	13	10	NaN	9	11	9	1.03846	0.645376	5	5	0	14	192	185
1219	>sp|Q8R191|SNG3_MOUSE Synaptogyrin-3 OS=Mus musculus OX=10090 GN=Syngr3 PE=1 SV=1	12	14	5	13	7	7	3	8	11	4	10	8	11	13	12	0.647059	0.153057	5	5	0	14	191	229
1220	>sp|Q9QZ06|TOLIP_MOUSE Toll-interacting protein OS=Mus musculus OX=10090 GN=Tollip PE=1 SV=1	11	8	6	8	5	11	9	11	10	14	12	8	11	12	8	1.44737	0.0334983	5	5	0	14	191	274
1221	>sp|P62242|RS8_MOUSE 40S ribosomal protein S8 OS=Mus musculus OX=10090 GN=Rps8 PE=1 SV=2	7	13	8	6	8	14	11	8	14	9	9	9	9	12	8	1.33333	0.144631	5	5	0	14	190	208
1222	>sp|Q99MN9|PCCB_MOUSE Propionyl-CoA carboxylase beta chain, mitochondrial OS=Mus musculus OX=10090 GN=Pccb PE=1 SV=2	9	12	8	10	7	10	10	9	14	4	7	9	11	6	9	1.02174	0.915045	5	5	0	14	189	541
1223	>sp|Q8VCW8|ACSF2_MOUSE Medium-chain acyl-CoA ligase ACSF2, mitochondrial OS=Mus musculus OX=10090 GN=Acsf2 PE=1 SV=1	5	11	13	9	10	3	5	7	10	11	6	11	12	12	14	0.75	0.264467	5	5	0	14	188	615
1224	>sp|Q99LG2|TNPO2_MOUSE Transportin-2 OS=Mus musculus OX=10090 GN=Tnpo2 PE=1 SV=1	9	11	5	9	7	NaN	11	12	10	12	8	8	14	10	13	1.37195	0.0422824	5	4	0	14	188	887
1225	>sp|Q9JMA1|UBP14_MOUSE Ubiquitin carboxyl-terminal hydrolase 14 OS=Mus musculus OX=10090 GN=Usp14 PE=1 SV=3	7	11	9	10	8	7	9	13	13	8	9	8	11	10	12	1.11111	0.509673	5	5	0	14	188	493
1226	>sp|Q9R1P3|PSB2_MOUSE Proteasome subunit beta type-2 OS=Mus musculus OX=10090 GN=Psmb2 PE=1 SV=1	10	10	7	10	10	7	9	10	9	6	10	7	13	6	9	0.87234	0.241504	5	5	0	14	186	201
1227	>sp|P27659|RL3_MOUSE 60S ribosomal protein L3 OS=Mus musculus OX=10090 GN=Rpl3 PE=1 SV=3	7	14	8	7	11	6	10	10	13	7	10	9	9	10	11	0.978723	0.916298	5	5	0	14	185	403
1228	>sp|Q93092|TALDO_MOUSE Transaldolase OS=Mus musculus OX=10090 GN=Taldo1 PE=1 SV=2	10	11	9	13	14	13	7	7	10	9	9	3	8	11	5	0.807018	0.167458	5	5	0	14	182	337
1229	>sp|Q9JMG7|HDGR3_MOUSE Hepatoma-derived growth factor-related protein 3 OS=Mus musculus OX=10090 GN=Hdgfl3 PE=1 SV=2	11	11	8	10	10	7	9	6	9	10	6	7	7	11	10	0.82	0.0851351	5	5	0	14	182	202
1230	>sp|Q9R1P1|PSB3_MOUSE Proteasome subunit beta type-3 OS=Mus musculus OX=10090 GN=Psmb3 PE=1 SV=1	6	10	7	10	9	6	12	6	14	11	9	9	9	7	9	1.16667	0.46305	5	5	0	14	182	205
1231	>sp|O54734|OST48_MOUSE Dolichyl-diphosphooligosaccharide--protein glycosyltransferase 48 kDa subunit OS=Mus musculus OX=10090 GN=Ddost PE=1 SV=2	8	10	12	8	12	5	8	14	6	11	9	8	6	9	9	0.88	0.541429	5	5	0	14	181	441
1232	>sp|Q8BP67|RL24_MOUSE 60S ribosomal protein L24 OS=Mus musculus OX=10090 GN=Rpl24 PE=1 SV=2	12	10	6	14	12	5	10	7	7	11	7	9	9	9	7	0.740741	0.146961	5	5	0	14	180	157
1233	>sp|Q9WV54|ASAH1_MOUSE Acid ceramidase OS=Mus musculus OX=10090 GN=Asah1 PE=1 SV=1	7	10	6	10	10	3	10	11	14	5	12	5	7	14	10	1	1	5	5	0	14	180	394
1234	>sp|P24529|TY3H_MOUSE Tyrosine 3-monooxygenase OS=Mus musculus OX=10090 GN=Th PE=1 SV=3	13	9	10	9	4	4	5	7	10	9	12	14	10	7	7	0.777778	0.309678	5	5	0	14	178	498
1235	>sp|Q3THE2|ML12B_MOUSE Myosin regulatory light chain 12B OS=Mus musculus OX=10090 GN=Myl12b PE=1 SV=2	7	5	5	8	5	7	11	10	8	7	7	11	9	14	13	1.43333	0.035512	5	5	0	14	177	172
1236	>sp|Q8CBY8|DCTN4_MOUSE Dynactin subunit 4 OS=Mus musculus OX=10090 GN=Dctn4 PE=1 SV=1	9	9	11	14	8	8	10	8	7	8	12	8	10	8	4	0.803922	0.127069	5	5	0	14	177	467
1237	>sp|P15209|NTRK2_MOUSE BDNF/NT-3 growth factors receptor OS=Mus musculus OX=10090 GN=Ntrk2 PE=1 SV=1	9	13	12	8	NaN	11	8	13	7	8	5	6	10	8	9	0.895238	0.525628	4	5	0	14	176	821
1238	>sp|Q9ER00|STX12_MOUSE Syntaxin-12 OS=Mus musculus OX=10090 GN=Stx12 PE=1 SV=1	11	7	8	8	4	14	8	6	10	10	10	9	9	11	11	1.26316	0.28302	5	5	0	14	175	274
1239	>sp|Q80TB8|VAT1L_MOUSE Synaptic vesicle membrane protein VAT-1 homolog-like OS=Mus musculus OX=10090 GN=Vat1l PE=1 SV=2	10	10	11	7	7	7	4	7	10	2	14	11	13	10	7	0.666667	0.0998507	5	5	0	14	174	417
1240	>sp|Q8R5J9|PRAF3_MOUSE PRA1 family protein 3 OS=Mus musculus OX=10090 GN=Arl6ip5 PE=1 SV=2	13	7	9	11	8	7	8	8	8	13	7	6	11	14	9	0.916667	0.612156	5	5	0	14	174	188
1241	>sp|Q9DBS2|TPRGL_MOUSE Tumor protein p63-regulated gene 1-like protein OS=Mus musculus OX=10090 GN=Tprg1l PE=1 SV=1	8	14	8	9	8	3	9	7	10	11	14	6	13	6	13	0.851064	0.466934	5	5	0	14	173	266
1242	>sp|Q8C754|VPS52_MOUSE Vacuolar protein sorting-associated protein 52 homolog OS=Mus musculus OX=10090 GN=Vps52 PE=1 SV=1	8	14	7	7	8	5	4	10	10	12	8	7	7	10	10	0.931818	0.776632	5	5	0	14	171	723
1243	>sp|P32037|GTR3_MOUSE Solute carrier family 2, facilitated glucose transporter member 3 OS=Mus musculus OX=10090 GN=Slc2a3 PE=1 SV=1	9	9	5	10	5	10	5	9	12	8	8	5	9	7	10	1.15789	0.469653	5	5	0	14	170	493
1244	>sp|Q9R1P4|PSA1_MOUSE Proteasome subunit alpha type-1 OS=Mus musculus OX=10090 GN=Psma1 PE=1 SV=1	4	9	6	7	14	11	10	10	13	7	10	7	7	5	10	1.275	0.294133	5	5	0	14	170	263
1245	>sp|Q9DCL8|IPP2_MOUSE Protein phosphatase inhibitor 2 OS=Mus musculus OX=10090 GN=Ppp1r2 PE=1 SV=3	12	11	10	5	10	NaN	6	4	9	9	9	6	7	14	9	0.729167	0.179175	5	4	0	14	168	206
1246	>sp|P63168|DYL1_MOUSE Dynein light chain 1, cytoplasmic OS=Mus musculus OX=10090 GN=Dynll1 PE=1 SV=1	14	10	6	14	4	9	6	9	9	9	5	5	8	12	9	0.875	0.587931	5	5	0	14	166	89
1247	>sp|Q9D3A9|TTYH1_MOUSE Protein tweety homolog 1 OS=Mus musculus OX=10090 GN=Ttyh1 PE=1 SV=1	12	6	7	14	7	8	10	8	10	5	7	7	9	10	9	0.891304	0.601316	5	5	0	14	165	450
1248	>sp|P68037|UB2L3_MOUSE Ubiquitin-conjugating enzyme E2 L3 OS=Mus musculus OX=10090 GN=Ube2l3 PE=1 SV=1	5	8	5	4	8	4	8	10	7	9	5	9	11	10	7	1.26667	0.262255	5	5	0	14	164	154
1249	>sp|Q6IRU5|CLCB_MOUSE Clathrin light chain B OS=Mus musculus OX=10090 GN=Cltb PE=1 SV=1	13	9	10	12	8	10	5	5	11	14	11	7	3	12	7	0.865385	0.501687	5	5	0	14	164	229
1250	>sp|Q8CGF6|WDR47_MOUSE WD repeat-containing protein 47 OS=Mus musculus OX=10090 GN=Wdr47 PE=1 SV=2	8	13	10	8	6	8	9	5	12	7	6	5	10	9	7	0.911111	0.641834	5	5	0	14	163	920
1251	>sp|Q99KY4|GAK_MOUSE Cyclin-G-associated kinase OS=Mus musculus OX=10090 GN=Gak PE=1 SV=2	7	13	7	11	7	NaN	9	12	10	9	8	7	9	8	7	1.11111	0.542661	5	4	0	14	163	1305
1252	>sp|P60766|CDC42_MOUSE Cell division control protein 42 homolog OS=Mus musculus OX=10090 GN=Cdc42 PE=1 SV=2	13	12	4	8	14	10	3	3	5	12	3	2	2	12	7	0.647059	0.207751	5	5	0	14	161	191
1253	>sp|Q9CQM9|GLRX3_MOUSE Glutaredoxin-3 OS=Mus musculus OX=10090 GN=Glrx3 PE=1 SV=1	6	11	7	13	8	7	14	6	9	8	7	NaN	7	10	10	0.977778	0.919093	5	5	0	14	161	337
1254	>sp|Q62318|TIF1B_MOUSE Transcription intermediary factor 1-beta OS=Mus musculus OX=10090 GN=Trim28 PE=1 SV=3	7	7	9	9	5	3	6	10	8	8	12	8	10	14	3	0.945946	0.782355	5	5	0	14	159	834
1255	>sp|Q8C0C7|SYFA_MOUSE Phenylalanine--tRNA ligase alpha subunit OS=Mus musculus OX=10090 GN=Farsa PE=1 SV=1	10	8	6	8	10	8	8	8	7	7	2	6	6	8	9	0.904762	0.339368	5	5	0	14	158	508
1256	>sp|Q9Z0P5|TWF2_MOUSE Twinfilin-2 OS=Mus musculus OX=10090 GN=Twf2 PE=1 SV=1	8	9	5	3	11	6	10	11	8	3	7	8	9	6	7	1.05556	0.848327	5	5	0	14	157	349
1257	>sp|Q60972|RBBP4_MOUSE Histone-binding protein RBBP4 OS=Mus musculus OX=10090 GN=Rbbp4 PE=1 SV=5	14	12	5	12	12	8	8	8	6	8	11	7	NaN	6	7	0.690909	0.0663071	5	5	0	14	156	425
1258	>sp|Q61481|PDE1A_MOUSE Calcium/calmodulin-dependent 3',5'-cyclic nucleotide phosphodiesterase 1A OS=Mus musculus OX=10090 GN=Pde1a PE=1 SV=3	7	8	6	9	14	3	6	11	7	6	7	7	9	8	11	0.75	0.279686	5	5	0	14	156	545
1259	>sp|Q9QUR6|PPCE_MOUSE Prolyl endopeptidase OS=Mus musculus OX=10090 GN=Prep PE=1 SV=1	4	8	6	4	6	2	14	9	10	12	11	11	9	8	8	1.67857	0.118396	5	5	0	14	154	710
1260	>sp|Q3UMR5|MCU_MOUSE Calcium uniporter protein, mitochondrial OS=Mus musculus OX=10090 GN=Mcu PE=1 SV=2	6	14	5	14	7	4	6	7	10	8	3	3	5	8	12	0.76087	0.351248	5	5	0	14	152	350
1261	>sp|Q9D1G1|RAB1B_MOUSE Ras-related protein Rab-1B OS=Mus musculus OX=10090 GN=Rab1b PE=1 SV=1	8	5	4	8	13	6	8	7	14	5	11	6	6	7	8	1.05263	0.861928	5	5	0	14	152	201
1262	>sp|Q8BJI1|S6A17_MOUSE Sodium-dependent neutral amino acid transporter SLC6A17 OS=Mus musculus OX=10090 GN=Slc6a17 PE=1 SV=1	14	9	9	10	NaN	3	11	7	8	6	4	13	NaN	6	7	0.666667	0.0945078	4	5	0	14	149	727
1263	>sp|P20060|HEXB_MOUSE Beta-hexosaminidase subunit beta OS=Mus musculus OX=10090 GN=Hexb PE=1 SV=2	7	7	3	7	5	10	3	5	11	11	5	3	6	8	14	1.37931	0.26959	5	5	0	14	147	536
1264	>sp|Q9DCT8|CRIP2_MOUSE Cysteine-rich protein 2 OS=Mus musculus OX=10090 GN=Crip2 PE=1 SV=1	6	9	14	10	9	6	9	5	7	6	6	4	6	7	10	0.6875	0.0733135	5	5	0	14	147	208
1265	>sp|O88935-1|SYN1_MOUSE Isoform Ib of Synapsin-1 OS=Mus musculus OX=10090 GN=Syn1	7	10	14	6	6	NaN	6	6	13	6	7	4	9	5	9	0.901163	0.725254	5	4	0	14	146	670
1266	>sp|Q6A4J8|UBP7_MOUSE Ubiquitin carboxyl-terminal hydrolase 7 OS=Mus musculus OX=10090 GN=Usp7 PE=1 SV=1	1	12	9	7	7	2	7	11	7	10	14	10	6	7	9	1.02778	0.935297	5	5	0	14	145	1103
1267	>sp|Q3UPL0|SC31A_MOUSE Protein transport protein Sec31A OS=Mus musculus OX=10090 GN=Sec31a PE=1 SV=2	10	12	5	6	6	3	10	NaN	10	8	4	8	14	14	2	0.99359	0.981795	5	4	0	14	141	1230
1268	>sp|O08529|CAN2_MOUSE Calpain-2 catalytic subunit OS=Mus musculus OX=10090 GN=Capn2 PE=1 SV=4	7	14	9	5	4	2	6	7	8	8	7	5	12	5	6	0.794872	0.466513	5	5	0	14	139	700
1269	>sp|Q8VDQ1|PTGR2_MOUSE Prostaglandin reductase 2 OS=Mus musculus OX=10090 GN=Ptgr2 PE=1 SV=2	6	8	4	9	7	2	14	5	7	5	9	8	9	6	5	0.970588	0.929509	5	5	0	14	138	351
1270	>sp|Q9WUM3|COR1B_MOUSE Coronin-1B OS=Mus musculus OX=10090 GN=Coro1b PE=1 SV=1	12	6	11	14	6	5	2	4	4	8	5	3	8	9	4	0.469388	0.025424	5	5	0	14	138	484
1271	>sp|O88531|PPT1_MOUSE Palmitoyl-protein thioesterase 1 OS=Mus musculus OX=10090 GN=Ppt1 PE=1 SV=2	5	6	10	8	7	6	10	9	14	7	5	6	5	8	3	1.27778	0.256599	5	5	0	14	137	306
1272	>sp|Q9DBE8|ALG2_MOUSE Alpha-1,3/1,6-mannosyltransferase ALG2 OS=Mus musculus OX=10090 GN=Alg2 PE=1 SV=2	4	4	6	8	6	3	11	8	5	5	9	8	7	2	5	1.14286	0.627877	5	5	0	14	132	415
1273	>tr|A0A1B0GRV0|A0A1B0GRV0_MOUSE 3'(2'),5'-bisphosphate nucleotidase 1 OS=Mus musculus OX=10090 GN=Bpnt1 PE=1 SV=1	6	11	11	8	6	6	6	5	14	1	3	1	7	7	10	0.761905	0.427289	5	5	0	14	127	323
1274	>sp|Q8VDJ3|VIGLN_MOUSE Vigilin OS=Mus musculus OX=10090 GN=Hdlbp PE=1 SV=1	8	9	14	5	2	5	2	4	4	7	6	8	8	4	5	0.578947	0.178993	5	5	0	14	124	1268
1275	>sp|P97765|WBP2_MOUSE WW domain-binding protein 2 OS=Mus musculus OX=10090 GN=Wbp2 PE=1 SV=1	NaN	9	9	5	9	5	NaN	NaN	7	NaN	NaN	9	11	14	10	0.75	0.284606	4	2	0	14	123	261
1276	>sp|Q80TS3|AGRL3_MOUSE Adhesion G protein-coupled receptor L3 OS=Mus musculus OX=10090 GN=Adgrl3 PE=1 SV=3	10	NaN	NaN	NaN	NaN	8	8	10	12	10	4	NaN	9	NaN	14	0.96	#DIV/0!	1	5	0	14	123	1537
1277	>tr|A0A0G2JEA5|A0A0G2JEA5_MOUSE Predicted gene 43738 OS=Mus musculus OX=10090 GN=Gm43738 PE=4 SV=1	9	10	6	NaN	NaN	6	12	6	NaN	10	NaN	NaN	9	9	NaN	1.02	0.938052	3	4	0	14	122	862
1278	>tr|D3YYH0|D3YYH0_MOUSE PEX5-related protein OS=Mus musculus OX=10090 GN=Pex5l PE=1 SV=1	NaN	9	NaN	NaN	NaN	8	4	10	14	NaN	6	3	12	12	10	1	#DIV/0!	1	4	0	14	121	591
1279	>sp|Q8VCT3|AMPB_MOUSE Aminopeptidase B OS=Mus musculus OX=10090 GN=Rnpep PE=1 SV=2	5	14	4	6	6	2	NaN	4	9	5	1	1	8	5	7	0.714286	0.433147	5	4	0	14	109	650
1280	>sp|Q80YN3|BCAS1_MOUSE Breast carcinoma-amplified sequence 1 homolog OS=Mus musculus OX=10090 GN=Bcas1 PE=1 SV=3	11	13	NaN	NaN	4	NaN	5	6	10	14	5	3	4	NaN	7	0.9375	0.868068	3	4	0	14	107	633
1281	>tr|A2AEW9|A2AEW9_MOUSE GRIP1-associated protein 1 OS=Mus musculus OX=10090 GN=Gripap1 PE=1 SV=1	NaN	6	7	NaN	8	11	NaN	NaN	NaN	5	NaN	NaN	12	NaN	7	1.14286	0.699959	3	2	0	14	103	792
1282	>tr|F8VQE9|F8VQE9_MOUSE Arf-GAP with GTPase, ANK repeat and PH domain-containing protein 3 OS=Mus musculus OX=10090 GN=Agap3 PE=1 SV=1	NaN	14	NaN	10	4	NaN	NaN	7	NaN	14	9	9	NaN	5	NaN	1.125	0.81498	3	2	0	14	97	910
1283	>sp|Q62393|TPD52_MOUSE Tumor protein D52 OS=Mus musculus OX=10090 GN=Tpd52 PE=1 SV=2	NaN	NaN	8	11	NaN	NaN	NaN	NaN	5	7	9	NaN	9	7	6	0.631579	0.19171	2	2	0	14	92	224
1284	>tr|A0A0R4J0A6|A0A0R4J0A6_MOUSE Vesicular glutamate transporter 2 OS=Mus musculus OX=10090 GN=Slc17a6 PE=1 SV=1	NaN	7	14	3	3	NaN	2	NaN	6	4	12	NaN	6	4	4	0.592593	0.431792	4	3	0	14	83	582
1285	>sp|Q8CBW3|ABI1_MOUSE Abl interactor 1 OS=Mus musculus OX=10090 GN=Abi1 PE=1 SV=3	NaN	9	5	14	NaN	5	7	NaN	NaN	6	NaN	5	NaN	NaN	6	0.642857	0.27944	3	3	0	14	74	481
1286	>tr|F7AEH4|F7AEH4_MOUSE 40S ribosomal protein S12 OS=Mus musculus OX=10090 GN=Rps12 PE=1 SV=1	14	13	NaN	10	NaN	NaN	NaN	NaN	11	NaN	11	NaN	NaN	NaN	NaN	0.891892	#DIV/0!	3	1	0	14	67	137
1287	>sp|P20065-2|TYB4_MOUSE Isoform Short of Thymosin beta-4 OS=Mus musculus OX=10090 GN=Tmsb4x	3	2	4	4	NaN	14	2	2	NaN	5	7	6	NaN	9	1	1.76923	0.418653	4	4	0	14	66	44
1288	>sp|P63094|GNAS2_MOUSE Guanine nucleotide-binding protein G(s) subunit alpha isoforms short OS=Mus musculus OX=10090 GN=Gnas PE=1 SV=1	9	NaN	5	NaN	NaN	14	NaN	12	NaN	NaN	NaN	NaN	NaN	8	NaN	1.85714	0.115348	2	2	0	14	60	394
1289	>tr|Q3TYJ3|Q3TYJ3_MOUSE Cytoplasmic dynein 1 intermediate chain 1 OS=Mus musculus OX=10090 GN=Dync1i1 PE=1 SV=1	NaN	1	NaN	NaN	9	NaN	NaN	12	NaN	NaN	NaN	10	NaN	NaN	NaN	2.4	#DIV/0!	2	1	0	14	58	617
1290	>sp|Q8VD04|GRAP1_MOUSE GRIP1-associated protein 1 OS=Mus musculus OX=10090 GN=Gripap1 PE=1 SV=1	NaN	NaN	NaN	3	NaN	NaN	5	10	5	NaN	7	7	NaN	14	NaN	2.22222	#DIV/0!	1	3	0	14	55	806
1291	>tr|S4R2H2|S4R2H2_MOUSE Ankyrin repeat and sterile alpha motif domain-containing protein 1B OS=Mus musculus OX=10090 GN=Anks1b PE=1 SV=1	14	NaN	NaN	NaN	NaN	NaN	NaN	NaN	NaN	NaN	14	NaN	NaN	14	NaN	#DIV/0!	#DIV/0!	1	0	0	14	42	511
1292	>tr|G3X914|G3X914_MOUSE Cullin-5 OS=Mus musculus OX=10090 GN=Cul5 PE=1 SV=1	10	NaN	NaN	14	NaN	NaN	NaN	NaN	8	8	NaN	NaN	NaN	NaN	NaN	0.666667	0.183503	2	2	0	14	40	855
1293	>tr|J3QPW1|J3QPW1_MOUSE Phosphatidylinositol transfer protein alpha isoform OS=Mus musculus OX=10090 GN=Pitpna PE=1 SV=1	14	NaN	NaN	NaN	NaN	NaN	NaN	NaN	NaN	13	NaN	NaN	NaN	NaN	NaN	0.928571	#DIV/0!	1	1	0	14	40	272
1294	>sp|Q7TMK9-2|HNRPQ_MOUSE Isoform 2 of Heterogeneous nuclear ribonucleoprotein Q OS=Mus musculus OX=10090 GN=Syncrip	NaN	NaN	NaN	NaN	14	6	NaN	NaN	NaN	NaN	NaN	NaN	NaN	12	NaN	0.428571	#DIV/0!	1	1	0	14	32	562
1295	>tr|B1AWD9|B1AWD9_MOUSE Clathrin light chain OS=Mus musculus OX=10090 GN=Clta PE=1 SV=1	NaN	14	NaN	1	6	NaN	NaN	NaN	NaN	1	1	NaN	NaN	NaN	1	0.142857	#DIV/0!	3	1	0	14	32	248
1296	>tr|B1AWE0|B1AWE0_MOUSE Clathrin light chain OS=Mus musculus OX=10090 GN=Clta PE=1 SV=1	NaN	NaN	11	NaN	NaN	NaN	NaN	NaN	14	NaN	NaN	NaN	NaN	NaN	NaN	1.27273	#DIV/0!	1	1	0	14	25	216
1297	>sp|Q0KL02-3|TRIO_MOUSE Isoform 3 of Triple functional domain protein OS=Mus musculus OX=10090 GN=Trio	NaN	NaN	NaN	7	14	NaN	NaN	NaN	NaN	NaN	NaN	NaN	NaN	NaN	NaN	#DIV/0!	#DIV/0!	2	0	0	14	21	2569
1298	>sp|Q9R0Q1|SYTL4_MOUSE Synaptotagmin-like protein 4 OS=Mus musculus OX=10090 GN=Sytl4 PE=1 SV=1	NaN	NaN	NaN	NaN	NaN	NaN	14	NaN	NaN	NaN	NaN	NaN	NaN	NaN	NaN	#DIV/0!	#DIV/0!	0	1	0	14	21	673
1299	>tr|D3YWR3|D3YWR3_MOUSE Adhesion G protein-coupled receptor L3 OS=Mus musculus OX=10090 GN=Adgrl3 PE=1 SV=1	NaN	14	NaN	NaN	NaN	NaN	NaN	NaN	NaN	NaN	NaN	2	NaN	NaN	NaN	#DIV/0!	#DIV/0!	1	0	0	14	16	1268
1300	>sp|Q2UY11|COSA1_MOUSE Collagen alpha-1(XXVIII) chain OS=Mus musculus OX=10090 GN=Col28a1 PE=2 SV=1	NaN	NaN	NaN	NaN	NaN	NaN	NaN	NaN	NaN	NaN	NaN	NaN	NaN	NaN	NaN	#DIV/0!	#DIV/0!	0	0	0	14	14	1141
1301	>sp|Q64487-7|PTPRD_MOUSE Isoform G of Receptor-type tyrosine-protein phosphatase delta OS=Mus musculus OX=10090 GN=Ptprd	NaN	NaN	NaN	NaN	NaN	NaN	14	NaN	NaN	NaN	NaN	NaN	NaN	NaN	NaN	#DIV/0!	#DIV/0!	0	1	0	14	14	1905
1302	>sp|Q80TS3-2|AGRL3_MOUSE Isoform 2 of Adhesion G protein-coupled receptor L3 OS=Mus musculus OX=10090 GN=Adgrl3	NaN	NaN	NaN	NaN	NaN	NaN	NaN	NaN	NaN	NaN	NaN	NaN	NaN	NaN	NaN	#DIV/0!	#DIV/0!	0	0	0	14	14	1342
1303	>sp|Q91ZU6-4|DYST_MOUSE Isoform 4 of Dystonin OS=Mus musculus OX=10090 GN=Dst	NaN	NaN	NaN	14	NaN	NaN	NaN	NaN	NaN	NaN	NaN	NaN	NaN	NaN	NaN	#DIV/0!	#DIV/0!	1	0	0	14	14	7406
1304	>tr|A2ATP6|A2ATP6_MOUSE Myelin expression factor 2 OS=Mus musculus OX=10090 GN=Myef2 PE=1 SV=2	NaN	NaN	NaN	NaN	NaN	NaN	NaN	NaN	NaN	NaN	NaN	NaN	NaN	NaN	NaN	#DIV/0!	#DIV/0!	0	0	0	14	14	567
1305	>tr|D3Z5K8|D3Z5K8_MOUSE SH3 and multiple ankyrin repeat domains protein 2 OS=Mus musculus OX=10090 GN=Shank2 PE=1 SV=1	NaN	NaN	NaN	NaN	NaN	NaN	14	NaN	NaN	NaN	NaN	NaN	NaN	NaN	NaN	#DIV/0!	#DIV/0!	0	1	0	14	14	1841
1306	>tr|H3BL28|H3BL28_MOUSE Protein phosphatase 1, regulatory subunit 9A (Fragment) OS=Mus musculus OX=10090 GN=Ppp1r9a PE=1 SV=1	NaN	NaN	NaN	NaN	NaN	NaN	NaN	NaN	NaN	NaN	NaN	NaN	NaN	NaN	NaN	#DIV/0!	#DIV/0!	0	0	0	14	14	1042
1307	>sp|P62627|DLRB1_MOUSE Dynein light chain roadblock-type 1 OS=Mus musculus OX=10090 GN=Dynlrb1 PE=1 SV=3	11	13	9	13	12	10	9	9	13	9	13	8	6	8	9	0.862069	0.175699	5	5	0	13	206	96
1308	>sp|Q922B2|SYDC_MOUSE Aspartate--tRNA ligase, cytoplasmic OS=Mus musculus OX=10090 GN=Dars1 PE=1 SV=2	8	9	11	9	8	10	10	7	13	7	10	9	7	10	10	1.04444	0.756979	5	5	0	13	189	501
1309	>sp|Q9WV60|GSK3B_MOUSE Glycogen synthase kinase-3 beta OS=Mus musculus OX=10090 GN=Gsk3b PE=1 SV=2	8	8	9	10	13	7	7	13	11	11	8	6	11	9	9	1.02083	0.898339	5	5	0	13	186	420
1310	>sp|Q99L43|CDS2_MOUSE Phosphatidate cytidylyltransferase 2 OS=Mus musculus OX=10090 GN=Cds2 PE=1 SV=1	8	10	8	8	10	9	13	12	11	11	7	6	6	8	12	1.27273	0.0195763	5	5	0	13	184	444
1311	>sp|Q9CQ92|FIS1_MOUSE Mitochondrial fission 1 protein OS=Mus musculus OX=10090 GN=Fis1 PE=1 SV=1	12	6	6	11	7	13	11	8	12	10	9	9	10	12	7	1.28571	0.159928	5	5	0	13	184	152
1312	>sp|Q99LR1|ABD12_MOUSE Lysophosphatidylserine lipase ABHD12 OS=Mus musculus OX=10090 GN=Abhd12 PE=1 SV=2	8	11	9	9	11	6	7	10	8	11	13	3	7	8	10	0.875	0.308937	5	5	0	13	180	398
1313	>sp|P62702|RS4X_MOUSE 40S ribosomal protein S4, X isoform OS=Mus musculus OX=10090 GN=Rps4x PE=1 SV=2	10	9	12	5	10	13	11	8	12	11	10	10	8	6	6	1.19565	0.243095	5	5	0	13	179	263
1314	>sp|Q9CQN1|TRAP1_MOUSE Heat shock protein 75 kDa, mitochondrial OS=Mus musculus OX=10090 GN=Trap1 PE=1 SV=1	12	12	5	10	11	4	6	6	8	7	7	10	12	11	9	0.62	0.0317347	5	5	0	13	178	706
1315	>sp|Q9R1R2|TRIM3_MOUSE Tripartite motif-containing protein 3 OS=Mus musculus OX=10090 GN=Trim3 PE=1 SV=1	4	10	12	12	12	6	8	10	13	NaN	8	13	8	9	13	0.925	0.742291	5	4	0	13	177	744
1316	>sp|Q8QZS1|HIBCH_MOUSE 3-hydroxyisobutyryl-CoA hydrolase, mitochondrial OS=Mus musculus OX=10090 GN=Hibch PE=1 SV=1	7	9	10	6	8	6	11	11	5	9	6	9	8	10	8	1.05	0.787549	5	5	0	13	176	385
1317	>sp|Q99L47|F10A1_MOUSE Hsc70-interacting protein OS=Mus musculus OX=10090 GN=St13 PE=1 SV=1	12	9	7	13	8	8	5	6	7	12	5	13	8	12	11	0.77551	0.22503	5	5	0	13	175	371
1318	>sp|Q9CQC7|NDUB4_MOUSE NADH dehydrogenase [ubiquinone] 1 beta subcomplex subunit 4 OS=Mus musculus OX=10090 GN=Ndufb4 PE=1 SV=3	11	10	12	8	9	11	8	5	10	8	7	5	9	11	13	0.84	0.23607	5	5	0	13	175	129
1319	>sp|Q9DBC7|KAP0_MOUSE cAMP-dependent protein kinase type I-alpha regulatory subunit OS=Mus musculus OX=10090 GN=Prkar1a PE=1 SV=3	9	11	11	10	11	9	7	13	3	12	6	6	7	11	13	0.846154	0.410818	5	5	0	13	175	381
1320	>sp|Q3TDK6|ROGDI_MOUSE Protein rogdi homolog OS=Mus musculus OX=10090 GN=Rogdi PE=1 SV=2	NaN	NaN	10	9	11	9	10	8	13	10	7	8	10	9	9	1	1	3	5	0	13	174	287
1321	>sp|Q9WVK8|CP46A_MOUSE Cholesterol 24-hydroxylase OS=Mus musculus OX=10090 GN=Cyp46a1 PE=1 SV=1	9	8	6	12	11	4	10	10	9	11	7	7	10	7	7	0.956522	0.813118	5	5	0	13	174	500
1322	>sp|O08583|THOC4_MOUSE THO complex subunit 4 OS=Mus musculus OX=10090 GN=Alyref PE=1 SV=3	13	6	9	10	9	10	11	9	4	10	8	8	8	7	7	0.93617	0.729196	5	5	0	13	173	255
1323	>sp|Q99J99|THTM_MOUSE 3-mercaptopyruvate sulfurtransferase OS=Mus musculus OX=10090 GN=Mpst PE=1 SV=4	9	8	6	8	13	8	9	9	7	7	6	13	13	9	4	0.909091	0.537191	5	5	0	13	173	297
1324	>tr|E9PY16|E9PY16_MOUSE ArfGAP with dual PH domains 1 OS=Mus musculus OX=10090 GN=Adap1 PE=1 SV=1	7	10	10	7	13	3	7	10	9	9	7	8	7	7	11	0.808511	0.31504	5	5	0	13	171	374
1325	>sp|Q80X80|C2C2L_MOUSE Phospholipid transfer protein C2CD2L OS=Mus musculus OX=10090 GN=C2cd2l PE=1 SV=3	13	10	10	10	11	7	5	7	9	13	7	5	13	10	9	0.759259	0.11628	5	5	0	13	170	706
1326	>sp|Q922D8|C1TC_MOUSE C-1-tetrahydrofolate synthase, cytoplasmic OS=Mus musculus OX=10090 GN=Mthfd1 PE=1 SV=4	5	11	11	13	12	6	4	5	9	7	5	7	8	10	12	0.596154	0.033855	5	5	0	13	170	935
1327	>sp|P60904|DNJC5_MOUSE DnaJ homolog subfamily C member 5 OS=Mus musculus OX=10090 GN=Dnajc5 PE=1 SV=1	9	10	5	9	7	8	4	11	13	7	11	9	7	8	9	1.075	0.748195	5	5	0	13	169	198
1328	>sp|Q99PL6|UBXN6_MOUSE UBX domain-containing protein 6 OS=Mus musculus OX=10090 GN=Ubxn6 PE=1 SV=1	7	10	8	10	8	6	9	9	7	7	8	8	13	7	9	0.883721	0.272456	5	5	0	13	167	442
1329	>sp|Q9WTR5|CAD13_MOUSE Cadherin-13 OS=Mus musculus OX=10090 GN=Cdh13 PE=1 SV=2	5	7	8	6	9	6	7	7	7	10	5	9	11	3	11	1.05714	0.6938	5	5	0	13	167	714
1330	>sp|Q8R0A7|K0513_MOUSE Uncharacterized protein KIAA0513 OS=Mus musculus OX=10090 GN=Kiaa0513 PE=1 SV=1	9	9	8	10	4	7	9	11	7	8	12	4	13	11	7	1.05	0.764145	5	5	0	13	166	407
1331	>sp|Q61206|PA1B2_MOUSE Platelet-activating factor acetylhydrolase IB subunit beta OS=Mus musculus OX=10090 GN=Pafah1b2 PE=1 SV=2	6	7	2	7	8	7	10	8	9	8	13	8	9	8	8	1.4	0.0735902	5	5	0	13	165	229
1332	>sp|Q8BYM5|NLGN3_MOUSE Neuroligin-3 OS=Mus musculus OX=10090 GN=Nlgn3 PE=1 SV=2	6	10	11	7	8	9	10	7	NaN	13	8	10	4	7	13	1.16071	0.404005	5	4	0	13	164	825
1333	>sp|Q8CDN6|TXNL1_MOUSE Thioredoxin-like protein 1 OS=Mus musculus OX=10090 GN=Txnl1 PE=1 SV=3	10	5	7	9	6	6	8	6	13	5	11	10	9	11	7	1.02703	0.909712	5	5	0	13	162	289
1334	>sp|P35505|FAAA_MOUSE Fumarylacetoacetase OS=Mus musculus OX=10090 GN=Fah PE=1 SV=2	8	6	7	6	5	4	7	9	6	9	9	7	10	6	10	1.09375	0.592708	5	5	0	13	158	419
1335	>sp|P35585|AP1M1_MOUSE AP-1 complex subunit mu-1 OS=Mus musculus OX=10090 GN=Ap1m1 PE=1 SV=3	11	8	8	7	6	7	9	8	10	5	6	5	7	7	7	0.975	0.871768	5	5	0	13	158	423
1336	>sp|P54830|PTN5_MOUSE Tyrosine-protein phosphatase non-receptor type 5 OS=Mus musculus OX=10090 GN=Ptpn5 PE=1 SV=2	9	11	8	12	9	4	7	6	6	5	8	8	8	13	4	0.571429	0.00154997	5	5	0	13	155	541
1337	>sp|Q8CIB5|FERM2_MOUSE Fermitin family homolog 2 OS=Mus musculus OX=10090 GN=Fermt2 PE=1 SV=1	7	5	12	6	6	2	10	11	6	6	11	13	10	8	7	0.972222	0.924117	5	5	0	13	155	680
1338	>sp|Q920P5|KAD5_MOUSE Adenylate kinase isoenzyme 5 OS=Mus musculus OX=10090 GN=Ak5 PE=1 SV=2	9	6	8	9	7	6	8	7	10	7	8	5	13	7	11	0.974359	0.828668	5	5	0	13	155	562
1339	>sp|Q922F4|TBB6_MOUSE Tubulin beta-6 chain OS=Mus musculus OX=10090 GN=Tubb6 PE=1 SV=1	8	9	1	11	11	NaN	5	9	13	13	5	9	6	7	13	1.25	0.48033	5	4	0	13	155	447
1340	>sp|Q9Z2D6-2|MECP2_MOUSE Isoform B of Methyl-CpG-binding protein 2 OS=Mus musculus OX=10090 GN=Mecp2	5	8	8	10	NaN	8	4	6	5	8	12	9	8	11	6	0.8	0.265756	4	5	0	13	155	501
1341	>sp|P21619|LMNB2_MOUSE Lamin-B2 OS=Mus musculus OX=10090 GN=Lmnb2 PE=1 SV=2	11	11	13	7	6	NaN	5	6	6	11	6	11	9	10	11	0.729167	0.217253	5	4	0	13	154	596
1342	>sp|P10639|THIO_MOUSE Thioredoxin OS=Mus musculus OX=10090 GN=Txn PE=1 SV=3	9	8	12	13	7	13	8	4	7	4	9	10	5	5	5	0.734694	0.234018	5	5	0	13	153	105
1343	>sp|P62192|PRS4_MOUSE 26S proteasome regulatory subunit 4 OS=Mus musculus OX=10090 GN=Psmc1 PE=1 SV=1	7	4	6	12	8	13	3	4	10	3	4	8	11	8	10	0.891892	0.752748	5	5	0	13	153	440
1344	>sp|Q78IK2|ATPMD_MOUSE ATP synthase membrane subunit DAPIT, mitochondrial OS=Mus musculus OX=10090 GN=Atp5md PE=1 SV=1	7	6	6	9	12	7	8	4	13	5	11	6	8	8	9	0.925	0.764903	5	5	0	13	153	58
1345	>sp|O35593|PSDE_MOUSE 26S proteasome non-ATPase regulatory subunit 14 OS=Mus musculus OX=10090 GN=Psmd14 PE=1 SV=2	13	9	7	6	6	8	7	8	6	6	6	12	7	11	7	0.853659	0.414012	5	5	0	13	152	310
1346	>sp|Q3UYC0|PPM1H_MOUSE Protein phosphatase 1H OS=Mus musculus OX=10090 GN=Ppm1h PE=1 SV=1	13	8	6	8	9	5	6	8	9	5	9	8	7	5	8	0.75	0.158405	5	5	0	13	152	513
1347	>sp|Q61102|ABCB7_MOUSE ATP-binding cassette sub-family B member 7, mitochondrial OS=Mus musculus OX=10090 GN=Abcb7 PE=1 SV=3	9	6	4	10	10	2	10	8	12	8	6	6	5	5	6	1.02564	0.925014	5	5	0	13	152	752
1348	>sp|Q8BIW1|PRUN1_MOUSE Exopolyphosphatase PRUNE1 OS=Mus musculus OX=10090 GN=Prune1 PE=1 SV=1	7	7	13	6	8	3	10	10	6	7	6	6	9	7	5	0.878049	0.595925	5	5	0	13	152	454
1349	>sp|Q9CX86|ROA0_MOUSE Heterogeneous nuclear ribonucleoprotein A0 OS=Mus musculus OX=10090 GN=Hnrnpa0 PE=1 SV=1	13	10	6	9	7	5	7	6	6	7	7	8	7	10	7	0.688889	0.0602552	5	5	0	13	152	305
1350	>sp|Q91VM5|RMXL1_MOUSE RNA binding motif protein, X-linked-like-1 OS=Mus musculus OX=10090 GN=Rbmxl1 PE=2 SV=1	6	9	NaN	7	11	1	13	11	NaN	9	13	12	6	8	7	1.0303	0.93305	4	4	0	13	150	388
1351	>sp|P14148|RL7_MOUSE 60S ribosomal protein L7 OS=Mus musculus OX=10090 GN=Rpl7 PE=1 SV=2	11	7	8	6	9	8	8	4	13	10	7	3	9	5	9	1.04878	0.820196	5	5	0	13	149	270
1352	>sp|P70699|LYAG_MOUSE Lysosomal alpha-glucosidase OS=Mus musculus OX=10090 GN=Gaa PE=1 SV=2	4	3	8	4	6	6	9	8	4	11	8	10	9	11	7	1.52	0.121976	5	5	0	13	149	953
1353	>sp|P97370|AT1B3_MOUSE Sodium/potassium-transporting ATPase subunit beta-3 OS=Mus musculus OX=10090 GN=Atp1b3 PE=1 SV=1	8	3	5	5	7	6	12	8	7	13	10	5	12	9	6	1.64286	0.0598379	5	5	0	13	146	278
1354	>sp|Q9Z0H8|CLIP2_MOUSE CAP-Gly domain-containing linker protein 2 OS=Mus musculus OX=10090 GN=Clip2 PE=1 SV=2	5	11	11	13	7	5	5	5	1	10	3	NaN	11	13	13	0.553191	0.0745788	5	5	0	13	146	1047
1355	>tr|E9Q3M9|E9Q3M9_MOUSE Capping protein-inhibiting regulator of actin-like OS=Mus musculus OX=10090 GN=Cracdl PE=1 SV=1	6	12	8	11	3	6	5	10	1	7	4	7	10	11	2	0.725	0.346594	5	5	0	13	146	1175
1356	>sp|P52760|RIDA_MOUSE 2-iminobutanoate/2-iminopropanoate deaminase OS=Mus musculus OX=10090 GN=Rida PE=1 SV=3	3	4	4	5	10	11	4	9	7	8	8	5	10	5	6	1.5	0.164043	5	5	0	13	145	135
1357	>sp|Q6ZWN5|RS9_MOUSE 40S ribosomal protein S9 OS=Mus musculus OX=10090 GN=Rps9 PE=1 SV=3	6	7	5	10	5	8	5	6	12	7	8	8	7	13	7	1.15152	0.52991	5	5	0	13	145	194
1358	>sp|P27661|H2AX_MOUSE Histone H2AX OS=Mus musculus OX=10090 GN=H2ax PE=1 SV=2	2	NaN	7	12	7	10	10	6	5	2	4	6	11	5	10	0.942857	0.877386	4	5	0	13	144	143
1359	>sp|P61971|NTF2_MOUSE Nuclear transport factor 2 OS=Mus musculus OX=10090 GN=Nutf2 PE=1 SV=1	5	11	6	7	7	5	10	3	13	8	9	4	9	9	5	1.08333	0.776632	5	5	0	13	143	127
1360	>sp|D3YXK2|SAFB1_MOUSE Scaffold attachment factor B1 OS=Mus musculus OX=10090 GN=Safb PE=1 SV=2	7	10	9	10	8	1	4	4	NaN	11	3	4	10	13	7	0.568182	0.0960334	5	4	0	13	141	937
1361	>sp|Q791T5|MTCH1_MOUSE Mitochondrial carrier homolog 1 OS=Mus musculus OX=10090 GN=Mtch1 PE=1 SV=1	9	6	9	8	8	6	6	6	7	6	5	6	4	8	8	0.775	0.014958	5	5	0	13	140	389
1362	>sp|O88851|RBBP9_MOUSE Putative hydrolase RBBP9 OS=Mus musculus OX=10090 GN=Rbbp9 PE=1 SV=2	6	10	6	8	3	4	6	9	10	8	13	6	5	7	6	1.12121	0.627877	5	5	0	13	139	186
1363	>sp|Q9WUC3|LY6H_MOUSE Lymphocyte antigen 6H OS=Mus musculus OX=10090 GN=Ly6h PE=1 SV=2	3	8	6	5	13	7	5	5	10	5	6	8	5	6	11	0.914286	0.767863	5	5	0	13	139	139
1364	>sp|Q9D0J8|PTMS_MOUSE Parathymosin OS=Mus musculus OX=10090 GN=Ptms PE=1 SV=3	13	3	9	9	5	4	7	8	5	9	3	7	7	11	5	0.846154	0.560273	5	5	0	13	138	101
1365	>sp|Q8VEH5|EPMIP_MOUSE EPM2A-interacting protein 1 OS=Mus musculus OX=10090 GN=Epm2aip1 PE=1 SV=1	7	5	6	5	10	5	6	6	6	6	8	5	9	6	6	0.878788	0.42357	5	5	0	13	137	606
1366	>sp|Q9QXK3|COPG2_MOUSE Coatomer subunit gamma-2 OS=Mus musculus OX=10090 GN=Copg2 PE=1 SV=1	7	8	6	3	8	4	6	9	4	10	10	NaN	9	1	13	1.03125	0.900875	5	5	0	13	136	871
1367	>sp|P12970|RL7A_MOUSE 60S ribosomal protein L7a OS=Mus musculus OX=10090 GN=Rpl7a PE=1 SV=2	4	10	8	7	9	6	6	7	7	5	1	6	7	13	4	0.815789	0.237076	5	5	0	13	135	266
1368	>sp|Q9CR21|ACPM_MOUSE Acyl carrier protein, mitochondrial OS=Mus musculus OX=10090 GN=Ndufab1 PE=1 SV=1	10	8	9	5	4	13	7	7	8	3	10	8	1	7	6	1.05556	0.844545	5	5	0	13	135	156
1369	>sp|P26516|PSMD7_MOUSE 26S proteasome non-ATPase regulatory subunit 7 OS=Mus musculus OX=10090 GN=Psmd7 PE=1 SV=2	3	5	4	6	13	5	3	8	8	3	7	4	9	6	10	0.870968	0.712847	5	5	0	13	130	321
1370	>sp|Q9R0X4|ACOT9_MOUSE Acyl-coenzyme A thioesterase 9, mitochondrial OS=Mus musculus OX=10090 GN=Acot9 PE=1 SV=1	6	6	2	5	13	6	5	3	7	5	8	8	8	6	8	0.8125	0.550096	5	5	0	13	130	439
1371	>sp|Q80ZJ1|RAP2A_MOUSE Ras-related protein Rap-2a OS=Mus musculus OX=10090 GN=Rap2a PE=1 SV=2	11	5	5	3	7	10	12	2	13	10	4	4	9	4	4	1.51613	0.213278	5	5	0	13	127	183
1372	>sp|Q80U40|RIMB2_MOUSE RIMS-binding protein 2 OS=Mus musculus OX=10090 GN=Rimbp2 PE=1 SV=3	6	9	9	9	6	4	13	NaN	6	NaN	7	8	9	9	NaN	0.982906	0.954067	5	3	0	13	126	1072
1373	>sp|Q9CZX8|RS19_MOUSE 40S ribosomal protein S19 OS=Mus musculus OX=10090 GN=Rps19 PE=1 SV=3	12	NaN	NaN	13	9	9	7	NaN	NaN	10	8	9	NaN	11	NaN	0.764706	0.148148	3	3	0	13	126	145
1374	>tr|G5E8Y0|G5E8Y0_MOUSE Sodium/calcium exchanger 1 OS=Mus musculus OX=10090 GN=Slc8a1 PE=1 SV=2	7	5	5	7	9	9	5	9	9	NaN	13	8	9	NaN	6	1.21212	0.289311	5	4	0	13	126	970
1375	>tr|Q3UEQ1|Q3UEQ1_MOUSE Inositol polyphosphate-4-phosphatase type I A OS=Mus musculus OX=10090 GN=Inpp4a PE=1 SV=1	12	NaN	11	12	13	NaN	9	11	NaN	9	NaN	13	NaN	NaN	13	0.805556	0.025031	4	3	0	13	125	890
1376	>sp|Q148V7|RELCH_MOUSE RAB11-binding protein RELCH OS=Mus musculus OX=10090 GN=Relch PE=1 SV=1	NaN	NaN	5	8	7	NaN	11	9	6	10	6	NaN	10	NaN	12	1.35	0.174688	3	4	0	13	123	1216
1377	>sp|Q91YE6|IPO9_MOUSE Importin-9 OS=Mus musculus OX=10090 GN=Ipo9 PE=1 SV=3	4	9	8	7	8	2	4	7	9	10	2	6	8	13	NaN	0.888889	0.656468	5	5	0	13	123	1041
1378	>sp|P47791|GSHR_MOUSE Glutathione reductase, mitochondrial OS=Mus musculus OX=10090 GN=Gsr PE=1 SV=3	NaN	8	9	10	10	NaN	NaN	13	7	11	8	7	NaN	8	9	1.11712	0.523598	4	3	0	13	118	500
1379	>sp|P23927|CRYAB_MOUSE Alpha-crystallin B chain OS=Mus musculus OX=10090 GN=Cryab PE=1 SV=2	9	6	7	5	4	8	2	4	2	7	5	2	10	4	5	0.741935	0.322238	5	5	0	13	117	175
1380	>sp|Q9D0I9|SYRC_MOUSE Arginine--tRNA ligase, cytoplasmic OS=Mus musculus OX=10090 GN=Rars1 PE=1 SV=2	9	13	5	9	5	3	4	4	6	5	2	4	6	9	8	0.536585	0.0429529	5	5	0	13	117	660
1381	>sp|Q61941|NNTM_MOUSE NAD(P) transhydrogenase, mitochondrial OS=Mus musculus OX=10090 GN=Nnt PE=1 SV=2	13	7	7	NaN	4	2	4	9	2	9	NaN	3	10	8	12	0.670968	0.332997	4	5	0	13	115	1086
1382	>tr|Q99JZ4|Q99JZ4_MOUSE GTP-binding protein SAR1a OS=Mus musculus OX=10090 GN=Sar1a PE=1 SV=1	NaN	13	7	8	8	4	NaN	9	11	NaN	NaN	NaN	7	9	9	0.888889	0.690161	4	3	0	13	112	198
1383	>sp|P63323|RS12_MOUSE 40S ribosomal protein S12 OS=Mus musculus OX=10090 GN=Rps12 PE=1 SV=2	NaN	NaN	13	NaN	5	8	9	7	NaN	4	NaN	9	10	6	8	0.777778	0.533251	2	4	0	13	109	132
1384	>sp|Q5DQR4-3|STB5L_MOUSE Isoform 3 of Syntaxin-binding protein 5-like OS=Mus musculus OX=10090 GN=Stxbp5l	5	13	9	8	NaN	NaN	2	9	NaN	1	7	7	8	9	6	0.457143	0.159173	4	3	0	13	109	1161
1385	>tr|B0QZW1|B0QZW1_MOUSE Glutamate receptor 3 OS=Mus musculus OX=10090 GN=Gria3 PE=1 SV=1	9	11	NaN	NaN	10	NaN	13	7	7	9	11	NaN	NaN	NaN	6	0.9	0.590716	3	4	0	13	108	888
1386	>sp|Q9DB15|RM12_MOUSE 39S ribosomal protein L12, mitochondrial OS=Mus musculus OX=10090 GN=Mrpl12 PE=1 SV=2	8	6	8	13	2	2	8	3	4	7	8	NaN	1	11	7	0.648649	0.255185	5	5	0	13	107	201
1387	>sp|Q3UHD6|SNX27_MOUSE Sorting nexin-27 OS=Mus musculus OX=10090 GN=Snx27 PE=1 SV=2	4	5	13	8	7	5	4	3	6	7	NaN	5	4	8	4	0.675676	0.200535	5	5	0	13	103	539
1388	>sp|Q9JI46|NUDT3_MOUSE Diphosphoinositol polyphosphate phosphohydrolase 1 OS=Mus musculus OX=10090 GN=Nudt3 PE=1 SV=1	13	11	NaN	1	NaN	NaN	5	NaN	1	6	1	1	7	10	9	0.48	0.341075	3	3	0	13	93	168
1389	>sp|P63158|HMGB1_MOUSE High mobility group protein B1 OS=Mus musculus OX=10090 GN=Hmgb1 PE=1 SV=2	9	8	3	13	5	NaN	NaN	2	8	3	2	2	3	11	3	0.570175	0.266122	5	3	0	13	90	215
1390	>sp|Q03517|SCG2_MOUSE Secretogranin-2 OS=Mus musculus OX=10090 GN=Scg2 PE=1 SV=1	3	3	13	5	NaN	5	2	2	7	5	2	5	2	11	4	0.7	0.470949	4	5	0	13	89	617
1391	>tr|A0A3B2W864|A0A3B2W864_MOUSE Predicted gene, 49804 OS=Mus musculus OX=10090 GN=Gm49804 PE=4 SV=1	2	2	7	13	4	3	4	1	13	2	8	6	3	3	4	0.821429	0.746367	5	5	0	13	87	287
1392	>sp|Q3UTJ2|SRBS2_MOUSE Sorbin and SH3 domain-containing protein 2 OS=Mus musculus OX=10090 GN=Sorbs2 PE=1 SV=2	NaN	10	13	NaN	NaN	NaN	8	6	NaN	10	9	NaN	NaN	NaN	12	0.695652	0.156959	2	3	0	13	86	1180
1393	>tr|Q6P1Y9|Q6P1Y9_MOUSE Exocyst complex component 1 OS=Mus musculus OX=10090 GN=Exoc1 PE=1 SV=1	7	13	3	NaN	10	2	5	2	6	7	4	5	8	NaN	NaN	0.533333	0.124977	4	5	0	13	86	901
1394	>sp|Q80YA9|CNKR2_MOUSE Connector enhancer of kinase suppressor of ras 2 OS=Mus musculus OX=10090 GN=Cnksr2 PE=1 SV=1	3	4	7	13	NaN	3	3	NaN	8	3	1	NaN	3	7	5	0.62963	0.368917	4	4	0	13	85	1032
1395	>tr|S4R1P5|S4R1P5_MOUSE Dystonin OS=Mus musculus OX=10090 GN=Dst PE=1 SV=1	11	NaN	NaN	NaN	8	NaN	NaN	7	3	13	NaN	NaN	10	13	NaN	0.807018	0.671474	2	3	0	13	85	7717
1396	>sp|Q60899|ELAV2_MOUSE ELAV-like protein 2 OS=Mus musculus OX=10090 GN=Elavl2 PE=1 SV=1	7	13	1	NaN	6	NaN	1	NaN	8	9	2	3	2	10	NaN	0.888889	0.842956	4	3	0	13	76	360
1397	>sp|Q5SWU9|ACACA_MOUSE Acetyl-CoA carboxylase 1 OS=Mus musculus OX=10090 GN=Acaca PE=1 SV=1	1	2	NaN	6	2	NaN	4	4	3	3	2	1	9	2	13	1.27273	0.536963	4	4	0	13	73	2345
1398	>sp|Q9DBF1|AL7A1_MOUSE Alpha-aminoadipic semialdehyde dehydrogenase OS=Mus musculus OX=10090 GN=Aldh7a1 PE=1 SV=4	7	6	NaN	12	NaN	13	9	NaN	NaN	NaN	NaN	10	NaN	7	NaN	1.32	0.414376	3	2	0	13	73	539
1399	>sp|P46935|NEDD4_MOUSE E3 ubiquitin-protein ligase NEDD4 OS=Mus musculus OX=10090 GN=Nedd4 PE=1 SV=3	2	6	3	2	2	NaN	3	2	6	5	NaN	2	5	7	2	1.33333	0.428204	5	4	0	13	72	887
1400	>tr|Q7M6W1|Q7M6W1_MOUSE Reticulon OS=Mus musculus OX=10090 GN=Rtn1 PE=1 SV=1	NaN	10	5	13	6	NaN	NaN	NaN	NaN	NaN	NaN	NaN	NaN	10	NaN	#DIV/0!	#DIV/0!	4	0	0	13	58	208
1401	>sp|P15864|H12_MOUSE Histone H1.2 OS=Mus musculus OX=10090 GN=H1-2 PE=1 SV=2	13	3	3	1	1	1	NaN	NaN	2	3	5	NaN	1	3	2	0.47619	0.494155	5	3	0	13	56	212
1402	>sp|Q6PHZ2|KCC2D_MOUSE Calcium/calmodulin-dependent protein kinase type II subunit delta OS=Mus musculus OX=10090 GN=Camk2d PE=1 SV=1	NaN	NaN	1	NaN	NaN	5	NaN	NaN	NaN	NaN	NaN	NaN	11	13	NaN	5	#DIV/0!	1	1	0	13	56	499
1403	>tr|E9Q3V9|E9Q3V9_MOUSE Adhesion G protein-coupled receptor L1 OS=Mus musculus OX=10090 GN=Adgrl1 PE=1 SV=1	NaN	NaN	NaN	NaN	NaN	NaN	NaN	10	NaN	NaN	NaN	NaN	NaN	NaN	NaN	#DIV/0!	#DIV/0!	0	1	0	13	51	1516
1404	>sp|Q61696|HS71A_MOUSE Heat shock 70 kDa protein 1A OS=Mus musculus OX=10090 GN=Hspa1a PE=1 SV=2	NaN	NaN	NaN	NaN	NaN	12	12	NaN	NaN	NaN	NaN	NaN	NaN	13	NaN	#DIV/0!	#DIV/0!	0	2	0	13	50	641
1405	>sp|Q9Z0H4|CELF2_MOUSE CUGBP Elav-like family member 2 OS=Mus musculus OX=10090 GN=Celf2 PE=1 SV=1	NaN	NaN	NaN	NaN	NaN	NaN	NaN	3	NaN	NaN	NaN	6	6	NaN	13	#DIV/0!	#DIV/0!	0	1	0	13	46	508
1406	>sp|P97765-2|WBP2_MOUSE Isoform 2 of WW domain-binding protein 2 OS=Mus musculus OX=10090 GN=Wbp2	9	NaN	NaN	NaN	NaN	NaN	5	5	NaN	9	13	NaN	NaN	NaN	NaN	0.703704	#DIV/0!	1	3	0	13	41	216
1407	>tr|S4R2I2|S4R2I2_MOUSE Ankyrin repeat and sterile alpha motif domain-containing protein 1B OS=Mus musculus OX=10090 GN=Anks1b PE=1 SV=1	NaN	NaN	2	10	NaN	13	NaN	1	NaN	1	NaN	NaN	1	NaN	NaN	0.833333	0.877483	2	3	0	13	41	510
1408	>sp|Q9Z2W9|GRIA3_MOUSE Glutamate receptor 3 OS=Mus musculus OX=10090 GN=Gria3 PE=1 SV=2	NaN	1	13	NaN	NaN	NaN	NaN	NaN	NaN	1	NaN	NaN	8	NaN	NaN	0.142857	#DIV/0!	2	1	0	13	34	888
1409	>tr|E9Q0N0|E9Q0N0_MOUSE Intersectin-1 OS=Mus musculus OX=10090 GN=Itsn1 PE=1 SV=1	NaN	NaN	13	12	NaN	NaN	NaN	NaN	NaN	NaN	NaN	NaN	NaN	NaN	NaN	#DIV/0!	#DIV/0!	2	0	0	13	34	1719
1410	>tr|E9QLA5|E9QLA5_MOUSE Inverted formin-2 OS=Mus musculus OX=10090 GN=Inf2 PE=1 SV=1	NaN	NaN	NaN	9	13	NaN	6	NaN	NaN	NaN	NaN	NaN	NaN	NaN	6	0.545455	#DIV/0!	2	1	0	13	34	1271
1411	>sp|Q8BTG7-2|NDRG4_MOUSE Isoform 2 of Protein NDRG4 OS=Mus musculus OX=10090 GN=Ndrg4	1	1	NaN	13	NaN	8	NaN	1	1	NaN	1	1	1	1	NaN	0.666667	0.737114	3	3	0	13	31	339
1412	>tr|A0A1Y7VL44|A0A1Y7VL44_MOUSE Tetratricopeptide repeat protein 7B OS=Mus musculus OX=10090 GN=Ttc7b PE=1 SV=1	8	NaN	9	NaN	NaN	NaN	NaN	NaN	NaN	NaN	NaN	NaN	NaN	NaN	13	#DIV/0!	#DIV/0!	2	0	0	13	30	860
1413	>sp|Q80U23-2|SNPH_MOUSE Isoform 2 of Syntaphilin OS=Mus musculus OX=10090 GN=Snph	5	NaN	13	7	NaN	NaN	NaN	NaN	NaN	NaN	NaN	NaN	NaN	NaN	NaN	#DIV/0!	#DIV/0!	3	0	0	13	29	528
1414	>sp|Q6NS52-2|DGKB_MOUSE Isoform 2 of Diacylglycerol kinase beta OS=Mus musculus OX=10090 GN=Dgkb	NaN	NaN	NaN	NaN	13	10	1	1	1	NaN	NaN	NaN	NaN	NaN	NaN	0.25	#DIV/0!	1	4	0	13	27	795
1415	>tr|A0A0R4J087|A0A0R4J087_MOUSE Transporter OS=Mus musculus OX=10090 GN=Slc6a17 PE=1 SV=1	NaN	NaN	NaN	NaN	9	NaN	NaN	NaN	NaN	NaN	NaN	NaN	5	NaN	NaN	#DIV/0!	#DIV/0!	1	0	0	13	27	724
1416	>sp|P32921-2|SYWC_MOUSE Isoform 2 of Tryptophan--tRNA ligase, cytoplasmic OS=Mus musculus OX=10090 GN=Wars1	NaN	NaN	NaN	13	NaN	12	NaN	NaN	NaN	NaN	NaN	NaN	NaN	NaN	NaN	0.923077	#DIV/0!	1	1	0	13	25	475
1417	>tr|F7D3W5|F7D3W5_MOUSE Phosphodiesterase OS=Mus musculus OX=10090 GN=Gm45837 PE=1 SV=1	NaN	NaN	NaN	NaN	NaN	12	NaN	NaN	NaN	NaN	NaN	13	NaN	NaN	NaN	#DIV/0!	#DIV/0!	0	1	0	13	25	961
1418	>tr|D3YUD3|D3YUD3_MOUSE Inositol polyphosphate-4-phosphatase type I A OS=Mus musculus OX=10090 GN=Inpp4a PE=1 SV=2	NaN	NaN	NaN	NaN	NaN	11	NaN	NaN	NaN	NaN	NaN	NaN	NaN	NaN	NaN	#DIV/0!	#DIV/0!	0	1	0	13	24	954
1419	>sp|Q9CZ42-2|NNRD_MOUSE Isoform 2 of ATP-dependent (S)-NAD(P)H-hydrate dehydratase OS=Mus musculus OX=10090 GN=Naxd	NaN	1	1	1	NaN	NaN	NaN	1	1	1	NaN	1	NaN	1	13	1	#DIV/0!	3	3	0	13	23	298
1420	>sp|P09041|PGK2_MOUSE Phosphoglycerate kinase 2 OS=Mus musculus OX=10090 GN=Pgk2 PE=1 SV=4	NaN	NaN	NaN	NaN	NaN	13	5	NaN	NaN	NaN	NaN	NaN	NaN	NaN	NaN	#DIV/0!	#DIV/0!	0	2	0	13	20	417
1421	>tr|E9Q586|E9Q586_MOUSE Dynactin subunit 1 OS=Mus musculus OX=10090 GN=Dctn1 PE=1 SV=1	NaN	NaN	NaN	NaN	NaN	NaN	13	NaN	NaN	NaN	NaN	NaN	1	NaN	NaN	#DIV/0!	#DIV/0!	0	1	0	13	14	1239
1422	>sp|P48453-2|PP2BB_MOUSE Isoform 1 of Serine/threonine-protein phosphatase 2B catalytic subunit beta isoform OS=Mus musculus OX=10090 GN=Ppp3cb	NaN	NaN	NaN	NaN	NaN	NaN	NaN	13	NaN	NaN	NaN	NaN	NaN	NaN	NaN	#DIV/0!	#DIV/0!	0	1	0	13	13	524
1423	>sp|Q9D394-4|RUFY3_MOUSE Isoform 4 of Protein RUFY3 OS=Mus musculus OX=10090 GN=Rufy3	NaN	NaN	NaN	NaN	NaN	13	NaN	NaN	NaN	NaN	NaN	NaN	NaN	NaN	NaN	#DIV/0!	#DIV/0!	0	1	0	13	13	519
1424	>sp|Q9R1V6-18|ADA22_MOUSE Isoform 16 of Disintegrin and metalloproteinase domain-containing protein 22 OS=Mus musculus OX=10090 GN=Adam22	NaN	NaN	NaN	NaN	NaN	NaN	NaN	NaN	NaN	NaN	13	NaN	NaN	NaN	NaN	#DIV/0!	#DIV/0!	0	0	0	13	13	832
1425	>tr|B7ZCU3|B7ZCU3_MOUSE Abl interactor 1 OS=Mus musculus OX=10090 GN=Abi1 PE=1 SV=1	NaN	NaN	NaN	NaN	NaN	NaN	NaN	NaN	NaN	NaN	NaN	NaN	NaN	NaN	NaN	#DIV/0!	#DIV/0!	0	0	0	13	13	452
1426	>tr|H3BJZ7|H3BJZ7_MOUSE Protein unc-13 homolog A OS=Mus musculus OX=10090 GN=Unc13a PE=1 SV=1	NaN	NaN	NaN	NaN	NaN	NaN	NaN	NaN	NaN	NaN	NaN	NaN	NaN	NaN	NaN	#DIV/0!	#DIV/0!	0	0	0	13	13	1731
1427	>sp|O70435|PSA3_MOUSE Proteasome subunit alpha type-3 OS=Mus musculus OX=10090 GN=Psma3 PE=1 SV=3	12	8	11	10	8	9	10	10	9	8	12	7	10	8	10	0.938776	0.516077	5	5	0	12	190	255
1428	>sp|Q91VW3|SH3L3_MOUSE SH3 domain-binding glutamic acid-rich-like protein 3 OS=Mus musculus OX=10090 GN=Sh3bgrl3 PE=1 SV=1	10	11	8	6	8	9	12	11	8	11	10	11	8	10	8	1.18605	0.198131	5	5	0	12	189	93
1429	>sp|Q9CX34|SGT1_MOUSE Protein SGT1 homolog OS=Mus musculus OX=10090 GN=Sugt1 PE=1 SV=3	10	10	10	9	6	12	10	7	9	4	9	4	9	9	9	0.933333	0.712019	5	5	0	12	175	336
1430	>sp|Q9D8W5|PSD12_MOUSE 26S proteasome non-ATPase regulatory subunit 12 OS=Mus musculus OX=10090 GN=Psmd12 PE=1 SV=4	7	12	7	8	11	4	10	7	9	7	7	7	10	10	8	0.822222	0.308008	5	5	0	12	173	456
1431	>sp|Q3UHB1|NT5D3_MOUSE 5'-nucleotidase domain-containing protein 3 OS=Mus musculus OX=10090 GN=Nt5dc3 PE=1 SV=1	10	9	7	12	8	9	8	10	7	7	12	9	5	9	9	0.891304	0.364103	5	5	0	12	169	546
1432	>sp|Q9JHI5|IVD_MOUSE Isovaleryl-CoA dehydrogenase, mitochondrial OS=Mus musculus OX=10090 GN=Ivd PE=1 SV=1	10	6	9	8	12	9	8	12	8	6	6	3	8	9	10	0.955556	0.782355	5	5	0	12	168	424
1433	>sp|Q9Z2U1|PSA5_MOUSE Proteasome subunit alpha type-5 OS=Mus musculus OX=10090 GN=Psma5 PE=1 SV=1	9	8	7	9	10	11	9	7	7	10	7	6	8	8	5	1.02326	0.8383	5	5	0	12	166	241
1434	>tr|Q14BI1|Q14BI1_MOUSE Slc24a2 protein OS=Mus musculus OX=10090 GN=Slc24a2 PE=1 SV=1	2	11	8	12	8	7	9	12	10	6	9	6	10	8	9	1.07317	0.776632	5	5	0	12	166	711
1435	>sp|Q9DCN2|NB5R3_MOUSE NADH-cytochrome b5 reductase 3 OS=Mus musculus OX=10090 GN=Cyb5r3 PE=1 SV=3	5	10	5	9	7	8	8	10	9	8	8	8	8	6	7	1.19444	0.237076	5	5	0	12	165	301
1436	>sp|Q61137|ASTN1_MOUSE Astrotactin-1 OS=Mus musculus OX=10090 GN=Astn1 PE=1 SV=4	10	12	9	6	7	6	12	7	9	9	3	NaN	10	7	10	0.977273	0.896069	5	5	0	12	164	1302
1437	>sp|Q9JM14|NT5C_MOUSE 5'(3')-deoxyribonucleotidase, cytosolic type OS=Mus musculus OX=10090 GN=Nt5c PE=1 SV=1	9	8	8	7	8	10	8	11	6	8	12	NaN	8	9	9	1.075	0.535753	5	5	0	12	164	200
1438	>sp|P12815|PDCD6_MOUSE Programmed cell death protein 6 OS=Mus musculus OX=10090 GN=Pdcd6 PE=1 SV=2	8	5	7	8	9	5	4	7	12	7	11	8	12	10	8	0.945946	0.801149	5	5	0	12	159	191
1439	>sp|Q3TEA8|HP1B3_MOUSE Heterochromatin protein 1-binding protein 3 OS=Mus musculus OX=10090 GN=Hp1bp3 PE=1 SV=1	9	7	11	11	9	7	9	8	6	7	8	6	6	12	8	0.787234	0.0582052	5	5	0	12	158	554
1440	>sp|Q6NZL0|SOGA3_MOUSE Protein SOGA3 OS=Mus musculus OX=10090 GN=Soga3 PE=1 SV=2	6	7	6	9	8	9	7	12	8	7	7	4	10	9	8	1.19444	0.237076	5	5	0	12	157	945
1441	>sp|Q9DCD0|6PGD_MOUSE 6-phosphogluconate dehydrogenase, decarboxylating OS=Mus musculus OX=10090 GN=Pgd PE=1 SV=3	5	6	6	9	10	1	4	11	12	8	5	10	12	9	7	1	1	5	5	0	12	157	483
1442	>sp|B9EJ86|OSBL8_MOUSE Oxysterol-binding protein-related protein 8 OS=Mus musculus OX=10090 GN=Osbpl8 PE=1 SV=1	5	12	11	7	8	3	8	10	8	7	7	7	11	6	6	0.837209	0.442294	5	5	0	12	155	889
1443	>sp|Q99JB2|STML2_MOUSE Stomatin-like protein 2, mitochondrial OS=Mus musculus OX=10090 GN=Stoml2 PE=1 SV=1	5	7	12	8	7	10	10	9	8	4	10	11	3	7	9	1.05128	0.809613	5	5	0	12	155	353
1444	>sp|Q5PR73|DIRA2_MOUSE GTP-binding protein Di-Ras2 OS=Mus musculus OX=10090 GN=Diras2 PE=1 SV=1	8	7	11	7	12	8	8	10	7	7	5	10	9	7	6	0.888889	0.42258	5	5	0	12	154	199
1445	>sp|P45591|COF2_MOUSE Cofilin-2 OS=Mus musculus OX=10090 GN=Cfl2 PE=1 SV=1	4	5	5	12	8	10	7	8	9	8	8	3	9	8	8	1.23529	0.331909	5	5	0	12	153	166
1446	>tr|E9PX29|E9PX29_MOUSE Spectrin beta chain OS=Mus musculus OX=10090 GN=Sptbn4 PE=1 SV=1	11	10	9	5	7	2	9	11	7	5	5	9	12	7	7	0.809524	0.42357	5	5	0	12	153	2561
1447	>sp|O35405|PLD3_MOUSE 5'-3' exonuclease PLD3 OS=Mus musculus OX=10090 GN=Pld3 PE=1 SV=1	12	9	3	5	9	5	7	6	8	9	6	8	7	5	12	0.921053	0.740439	5	5	0	12	152	488
1448	>tr|Q3TGS7|Q3TGS7_MOUSE Sorting nexin-12 OS=Mus musculus OX=10090 GN=Snx12 PE=1 SV=1	4	8	12	5	5	11	6	8	6	12	8	7	11	6	5	1.26471	0.376772	5	5	0	12	152	166
1449	>sp|P56959|FUS_MOUSE RNA-binding protein FUS OS=Mus musculus OX=10090 GN=Fus PE=1 SV=1	7	5	6	11	6	6	7	5	9	8	6	12	4	8	4	1	1	5	5	0	12	151	518
1450	>sp|Q9CQ62|DECR_MOUSE 2,4-dienoyl-CoA reductase, mitochondrial OS=Mus musculus OX=10090 GN=Decr1 PE=1 SV=1	5	9	9	10	8	5	6	10	5	5	7	4	12	9	7	0.756098	0.161397	5	5	0	12	150	335
1451	>sp|Q9DB27|MCTS1_MOUSE Malignant T-cell-amplified sequence 1 OS=Mus musculus OX=10090 GN=Mcts1 PE=1 SV=1	7	6	9	7	8	2	4	9	12	7	6	7	10	8	8	0.918919	0.753229	5	5	0	12	150	181
1452	>sp|Q9EQQ9|OGA_MOUSE Protein O-GlcNAcase OS=Mus musculus OX=10090 GN=Oga PE=1 SV=2	12	NaN	8	9	5	2	6	10	9	8	6	6	9	9	12	0.823529	0.486915	4	5	0	12	150	916
1453	>sp|O09167|RL21_MOUSE 60S ribosomal protein L21 OS=Mus musculus OX=10090 GN=Rpl21 PE=1 SV=3	10	7	8	5	7	6	8	7	12	9	10	7	8	8	5	1.13514	0.46765	5	5	0	12	149	160
1454	>sp|Q9R1P0|PSA4_MOUSE Proteasome subunit alpha type-4 OS=Mus musculus OX=10090 GN=Psma4 PE=1 SV=1	9	12	5	5	7	10	7	6	10	6	6	7	8	8	7	1.02632	0.904348	5	5	0	12	148	261
1455	>sp|Q924M7|MPI_MOUSE Mannose-6-phosphate isomerase OS=Mus musculus OX=10090 GN=Mpi PE=1 SV=1	9	10	10	12	6	7	6	9	7	7	7	4	8	8	8	0.765957	0.0794854	5	5	0	12	147	423
1456	>sp|Q9CQI6|COTL1_MOUSE Coactosin-like protein OS=Mus musculus OX=10090 GN=Cotl1 PE=1 SV=3	8	8	7	8	7	7	8	5	5	5	8	5	12	6	8	0.789474	0.0460249	5	5	0	12	147	142
1457	>sp|P39688|FYN_MOUSE Tyrosine-protein kinase Fyn OS=Mus musculus OX=10090 GN=Fyn PE=1 SV=4	10	6	3	8	6	6	6	12	4	10	8	9	9	5	11	1.15152	0.608516	5	5	0	12	145	537
1458	>sp|P45952|ACADM_MOUSE Medium-chain specific acyl-CoA dehydrogenase, mitochondrial OS=Mus musculus OX=10090 GN=Acadm PE=1 SV=1	9	11	8	9	7	6	6	8	5	12	7	5	5	9	7	0.840909	0.351192	5	5	0	12	145	421
1459	>sp|P62301|RS13_MOUSE 40S ribosomal protein S13 OS=Mus musculus OX=10090 GN=Rps13 PE=1 SV=2	5	6	6	8	5	9	4	5	12	6	4	6	8	6	6	1.2	0.464426	5	5	0	12	145	151
1460	>sp|Q640R3|HECAM_MOUSE Hepatocyte cell adhesion molecule OS=Mus musculus OX=10090 GN=Hepacam PE=1 SV=2	11	8	12	11	6	6	5	7	6	8	9	7	5	6	8	0.666667	0.0318376	5	5	0	12	145	418
1461	>sp|Q9CQR4|ACO13_MOUSE Acyl-coenzyme A thioesterase 13 OS=Mus musculus OX=10090 GN=Acot13 PE=1 SV=1	8	9	11	4	12	7	9	6	3	6	10	9	6	3	8	0.704545	0.164043	5	5	0	12	145	140
1462	>sp|P35438|NMDZ1_MOUSE Glutamate receptor ionotropic, NMDA 1 OS=Mus musculus OX=10090 GN=Grin1 PE=1 SV=1	7	12	8	5	8	9	9	8	9	6	6	7	5	6	NaN	1.025	0.879765	5	5	0	12	143	938
1463	>sp|P47962|RL5_MOUSE 60S ribosomal protein L5 OS=Mus musculus OX=10090 GN=Rpl5 PE=1 SV=3	8	12	12	11	11	5	6	4	11	5	3	1	6	10	6	0.574074	0.0128125	5	5	0	12	142	297
1464	>sp|O89112|LANC1_MOUSE Glutathione S-transferase LANCL1 OS=Mus musculus OX=10090 GN=Lancl1 PE=1 SV=1	8	12	12	7	10	5	8	4	10	8	2	3	7	7	10	0.714286	0.0982817	5	5	0	12	141	399
1465	>sp|Q8C522|ENDD1_MOUSE Endonuclease domain-containing 1 protein OS=Mus musculus OX=10090 GN=Endod1 PE=1 SV=2	5	8	6	7	8	4	7	7	9	10	6	12	9	7	8	1.08824	0.625769	5	5	0	12	140	501
1466	>sp|P61021|RAB5B_MOUSE Ras-related protein Rab-5B OS=Mus musculus OX=10090 GN=Rab5b PE=1 SV=1	10	4	6	7	3	7	10	9	5	8	8	11	8	4	7	1.3	0.263486	5	5	0	12	138	215
1467	>sp|Q99KK7|DPP3_MOUSE Dipeptidyl peptidase 3 OS=Mus musculus OX=10090 GN=Dpp3 PE=1 SV=2	5	7	8	6	8	4	5	12	7	9	7	6	8	5	5	1.08824	0.708635	5	5	0	12	138	738
1468	>sp|Q9CZS1|AL1B1_MOUSE Aldehyde dehydrogenase X, mitochondrial OS=Mus musculus OX=10090 GN=Aldh1b1 PE=1 SV=1	9	8	9	4	7	5	6	6	9	9	10	7	12	7	5	0.945946	0.756979	5	5	0	12	138	519
1469	>tr|V9GX76|V9GX76_MOUSE Unconventional myosin-VI OS=Mus musculus OX=10090 GN=Myo6 PE=1 SV=1	7	8	NaN	9	7	4	5	11	6	6	5	6	8	7	7	0.825806	0.377568	4	5	0	12	136	1294
1470	>sp|Q9Z2W0|DNPEP_MOUSE Aspartyl aminopeptidase OS=Mus musculus OX=10090 GN=Dnpep PE=1 SV=2	11	12	5	5	7	4	4	11	3	11	9	5	5	8	6	0.825	0.565653	5	5	0	12	134	473
1471	>sp|Q61151|2A5E_MOUSE Serine/threonine-protein phosphatase 2A 56 kDa regulatory subunit epsilon isoform OS=Mus musculus OX=10090 GN=Ppp2r5e PE=1 SV=3	7	6	7	10	4	5	4	4	6	9	3	12	8	7	9	0.823529	0.397204	5	5	0	12	133	467
1472	>sp|Q6PE13|PRRT3_MOUSE Proline-rich transmembrane protein 3 OS=Mus musculus OX=10090 GN=Prrt3 PE=1 SV=1	6	9	10	8	NaN	4	NaN	12	5	10	5	6	8	8	8	0.939394	0.820689	4	4	0	12	133	971
1473	>sp|A2AQ25|SKT_MOUSE Sickle tail protein OS=Mus musculus OX=10090 GN=Skt PE=1 SV=1	5	NaN	12	11	10	9	NaN	7	NaN	11	NaN	7	9	10	11	0.947368	0.819378	4	3	0	12	131	1946
1474	>sp|Q9CQE8|RTRAF_MOUSE RNA transcription, translation and transport factor protein OS=Mus musculus OX=10090 GN=RTRAF PE=1 SV=1	4	6	6	12	7	6	11	4	9	6	5	4	6	7	12	1.02857	0.915553	5	5	0	12	131	244
1475	>sp|Q8JZN5|ACAD9_MOUSE Complex I assembly factor ACAD9, mitochondrial OS=Mus musculus OX=10090 GN=Acad9 PE=1 SV=2	3	4	11	6	8	5	7	9	7	4	6	5	7	12	8	1	1	5	5	0	12	130	625
1476	>sp|P62270|RS18_MOUSE 40S ribosomal protein S18 OS=Mus musculus OX=10090 GN=Rps18 PE=1 SV=3	6	6	7	12	4	11	6	6	7	7	6	4	5	6	10	1.05714	0.812433	5	5	0	12	129	152
1477	>sp|P47740|AL3A2_MOUSE Aldehyde dehydrogenase family 3 member A2 OS=Mus musculus OX=10090 GN=Aldh3a2 PE=1 SV=2	7	5	7	4	5	NaN	5	8	5	9	7	8	12	4	6	1.20536	0.343686	5	4	0	12	128	484
1478	>sp|Q07076|ANXA7_MOUSE Annexin A7 OS=Mus musculus OX=10090 GN=Anxa7 PE=1 SV=2	8	6	8	9	10	11	NaN	8	6	7	12	NaN	7	8	7	0.97561	0.873458	5	4	0	12	128	463
1479	>sp|Q8BLJ3|PLCX3_MOUSE PI-PLC X domain-containing protein 3 OS=Mus musculus OX=10090 GN=Plcxd3 PE=1 SV=1	5	8	NaN	7	6	3	10	5	12	8	6	4	10	8	4	1.16923	0.587341	4	5	0	12	126	321
1480	>sp|Q9WVL0|MAAI_MOUSE Maleylacetoacetate isomerase OS=Mus musculus OX=10090 GN=Gstz1 PE=1 SV=1	NaN	12	6	8	6	7	7	6	7	5	7	8	6	5	6	0.8	0.265556	4	5	0	12	126	216
1481	>sp|Q8CFI0|NED4L_MOUSE E3 ubiquitin-protein ligase NEDD4-like OS=Mus musculus OX=10090 GN=Nedd4l PE=1 SV=2	NaN	NaN	12	11	10	3	9	7	12	NaN	7	3	9	NaN	11	0.704545	0.214191	3	4	0	12	124	1004
1482	>sp|Q00493|CBPE_MOUSE Carboxypeptidase E OS=Mus musculus OX=10090 GN=Cpe PE=1 SV=2	6	9	3	12	9	9	3	5	5	4	7	4	7	6	5	0.666667	0.195016	5	5	0	12	121	476
1483	>sp|Q80UG2|PLXA4_MOUSE Plexin-A4 OS=Mus musculus OX=10090 GN=Plxna4 PE=1 SV=3	6	10	8	2	12	1	NaN	10	3	8	6	6	9	6	10	0.723684	0.459884	5	4	0	12	120	1893
1484	>sp|Q9QYB1|CLIC4_MOUSE Chloride intracellular channel protein 4 OS=Mus musculus OX=10090 GN=Clic4 PE=1 SV=3	3	7	7	3	5	3	6	9	4	6	6	3	12	2	5	1.12	0.671623	5	5	0	12	118	253
1485	>sp|P23492|PNPH_MOUSE Purine nucleoside phosphorylase OS=Mus musculus OX=10090 GN=Pnp PE=1 SV=2	8	7	3	5	NaN	3	4	7	9	5	5	7	5	5	5	0.973913	0.926185	4	5	0	12	116	289
1486	>sp|Q9DBR7|MYPT1_MOUSE Protein phosphatase 1 regulatory subunit 12A OS=Mus musculus OX=10090 GN=Ppp1r12a PE=1 SV=2	6	9	8	8	8	NaN	3	NaN	3	7	5	8	8	6	12	0.555556	0.0253952	5	3	0	12	115	1029
1487	>sp|Q62419|SH3G1_MOUSE Endophilin-A2 OS=Mus musculus OX=10090 GN=Sh3gl1 PE=1 SV=1	3	5	4	12	3	3	3	4	4	8	4	3	9	6	9	0.814815	0.618158	5	5	0	12	114	368
1488	>tr|Q3U432|Q3U432_MOUSE Growth arrest-specific protein 7 OS=Mus musculus OX=10090 GN=Gas7 PE=1 SV=1	NaN	6	NaN	8	NaN	NaN	6	9	6	6	8	NaN	7	12	9	0.964286	0.854765	2	4	0	12	114	416
1489	>sp|Q3TC72|FAHD2_MOUSE Fumarylacetoacetate hydrolase domain-containing protein 2A OS=Mus musculus OX=10090 GN=Fahd2 PE=1 SV=1	6	8	7	10	8	NaN	9	7	NaN	NaN	8	9	12	7	6	1.02564	0.877163	5	2	0	12	112	313
1490	>sp|O35143|ATIF1_MOUSE ATPase inhibitor, mitochondrial OS=Mus musculus OX=10090 GN=ATP5IF1 PE=1 SV=2	10	9	11	12	7	6	2	2	4	2	3	5	2	9	5	0.326531	0.000499487	5	5	0	12	111	106
1491	>sp|P03930|ATP8_MOUSE ATP synthase protein 8 OS=Mus musculus OX=10090 GN=Mtatp8 PE=1 SV=1	6	5	4	5	5	2	8	4	3	8	4	9	6	3	3	1	1	5	5	0	12	110	67
1492	>sp|Q9D358-2|PPAC_MOUSE Isoform 2 of Low molecular weight phosphotyrosine protein phosphatase OS=Mus musculus OX=10090 GN=Acp1	NaN	8	5	5	7	6	NaN	6	2	3	7	12	9	5	6	0.68	0.167714	4	4	0	12	109	158
1493	>sp|P03888|NU1M_MOUSE NADH-ubiquinone oxidoreductase chain 1 OS=Mus musculus OX=10090 GN=Mtnd1 PE=1 SV=3	7	3	4	4	6	5	6	7	6	5	7	7	5	2	5	1.20833	0.259845	5	5	0	12	108	318
1494	>sp|Q0GNC1|INF2_MOUSE Inverted formin-2 OS=Mus musculus OX=10090 GN=Inf2 PE=1 SV=1	8	10	8	NaN	NaN	3	NaN	6	5	7	2	5	9	4	NaN	0.605769	0.0315021	3	4	0	12	101	1273
1495	>sp|Q3UUG6|TBC24_MOUSE TBC1 domain family member 24 OS=Mus musculus OX=10090 GN=Tbc1d24 PE=1 SV=2	3	6	5	3	4	2	8	7	6	5	5	6	3	5	12	1.33333	0.27069	5	5	0	12	101	561
1496	>sp|O89023|TPP1_MOUSE Tripeptidyl-peptidase 1 OS=Mus musculus OX=10090 GN=Tpp1 PE=1 SV=2	6	9	2	7	6	2	5	3	4	6	5	2	5	3	7	0.666667	0.174373	5	5	0	12	100	562
1497	>tr|E9PUC5|E9PUC5_MOUSE PH and SEC7 domain-containing protein 3 OS=Mus musculus OX=10090 GN=Psd3 PE=1 SV=1	7	7	NaN	10	NaN	12	8	NaN	NaN	NaN	12	4	7	NaN	6	1.25	0.385178	3	2	0	12	96	376
1498	>sp|Q3TDD9|PPR21_MOUSE Protein phosphatase 1 regulatory subunit 21 OS=Mus musculus OX=10090 GN=Ppp1r21 PE=1 SV=2	4	12	5	2	4	3	4	3	3	5	4	6	5	8	1	0.666667	0.338004	5	5	0	12	94	780
1499	>tr|G5E814|G5E814_MOUSE NADH dehydrogenase [ubiquinone] 1 alpha subcomplex subunit 11 OS=Mus musculus OX=10090 GN=Ndufa11 PE=1 SV=1	8	12	8	NaN	12	5	11	NaN	10	5	7	NaN	NaN	NaN	NaN	0.775	0.297764	4	4	0	12	87	143
1500	>sp|Q80Y17|L2GL1_MOUSE Lethal(2) giant larvae protein homolog 1 OS=Mus musculus OX=10090 GN=Llgl1 PE=1 SV=1	5	12	4	4	6	1	5	5	4	5	2	1	4	5	3	0.645161	0.228027	5	5	0	12	83	1036
1501	>sp|E9PVA8|GCN1_MOUSE eIF-2-alpha kinase activator GCN1 OS=Mus musculus OX=10090 GN=Gcn1 PE=1 SV=1	NaN	4	2	3	NaN	NaN	5	12	4	7	4	6	3	4	7	2.33333	0.123288	3	4	0	12	80	2671
1502	>sp|Q7M6Y3|PICAL_MOUSE Phosphatidylinositol-binding clathrin assembly protein OS=Mus musculus OX=10090 GN=Picalm PE=1 SV=1	5	NaN	6	7	6	1	5	NaN	3	6	NaN	NaN	12	8	NaN	0.625	0.105519	4	4	0	12	79	660
1503	>sp|Q920E5|FPPS_MOUSE Farnesyl pyrophosphate synthase OS=Mus musculus OX=10090 GN=Fdps PE=1 SV=1	NaN	NaN	NaN	8	10	NaN	NaN	NaN	12	NaN	11	7	NaN	NaN	10	1.33333	#DIV/0!	2	1	0	12	70	353
1504	>tr|A0A494BAG2|A0A494BAG2_MOUSE E3 ubiquitin-protein ligase NEDD4-like OS=Mus musculus OX=10090 GN=Nedd4l PE=1 SV=1	12	11	NaN	NaN	NaN	NaN	NaN	NaN	NaN	12	NaN	NaN	NaN	11	NaN	1.04348	#DIV/0!	2	1	0	12	66	976
1505	>sp|Q61701|ELAV4_MOUSE ELAV-like protein 4 OS=Mus musculus OX=10090 GN=Elavl4 PE=1 SV=1	NaN	3	10	12	NaN	2	6	NaN	NaN	2	11	NaN	NaN	2	3	0.4	0.175014	3	3	0	12	64	385
1506	>sp|P47791-2|GSHR_MOUSE Isoform Cytoplasmic of Glutathione reductase, mitochondrial OS=Mus musculus OX=10090 GN=Gsr	2	NaN	NaN	NaN	NaN	10	9	NaN	NaN	NaN	NaN	NaN	10	NaN	NaN	4.75	#DIV/0!	1	2	0	12	61	474
1507	>sp|P60840|ENSA_MOUSE Alpha-endosulfine OS=Mus musculus OX=10090 GN=Ensa PE=1 SV=1	5	NaN	6	7	NaN	12	NaN	3	1	3	1	NaN	NaN	5	NaN	0.791667	0.689678	3	4	0	12	54	121
1508	>sp|Q8BL65-4|ABLM2_MOUSE Isoform 4 of Actin-binding LIM protein 2 OS=Mus musculus OX=10090 GN=Ablim2	NaN	12	NaN	NaN	7	NaN	NaN	NaN	NaN	8	NaN	NaN	NaN	NaN	10	0.842105	#DIV/0!	2	1	0	12	37	617
1509	>sp|Q7M6Y3-2|PICAL_MOUSE Isoform 2 of Phosphatidylinositol-binding clathrin assembly protein OS=Mus musculus OX=10090 GN=Picalm	NaN	NaN	NaN	NaN	NaN	10	NaN	NaN	NaN	NaN	9	NaN	NaN	NaN	5	#DIV/0!	#DIV/0!	0	1	0	12	36	597
1510	>tr|E9Q0W6|E9Q0W6_MOUSE Actin-binding LIM protein 2 OS=Mus musculus OX=10090 GN=Ablim2 PE=1 SV=1	NaN	1	NaN	12	NaN	NaN	NaN	NaN	NaN	NaN	7	NaN	NaN	9	NaN	#DIV/0!	#DIV/0!	2	0	0	12	29	607
1511	>tr|Q68FL0|Q68FL0_MOUSE Slc8a1 protein OS=Mus musculus OX=10090 GN=Slc8a1 PE=1 SV=1	NaN	NaN	NaN	NaN	NaN	NaN	NaN	NaN	NaN	7	NaN	NaN	NaN	8	NaN	#DIV/0!	#DIV/0!	0	1	0	12	27	958
1512	>tr|A6H6J9|A6H6J9_MOUSE Ankyrin repeat domain 50 OS=Mus musculus OX=10090 GN=Ankrd50 PE=1 SV=1	NaN	NaN	NaN	NaN	NaN	NaN	NaN	NaN	11	NaN	NaN	NaN	NaN	NaN	NaN	#DIV/0!	#DIV/0!	0	1	0	12	23	467
1513	>tr|D3YTQ3|D3YTQ3_MOUSE Heterogeneous nuclear ribonucleoprotein D-like OS=Mus musculus OX=10090 GN=Hnrnpdl PE=1 SV=1	2	NaN	NaN	12	NaN	NaN	NaN	1	1	NaN	NaN	5	1	NaN	NaN	0.142857	0.353003	2	2	0	12	23	420
1514	>sp|P15209-3|NTRK2_MOUSE Isoform L1 of BDNF/NT-3 growth factors receptor OS=Mus musculus OX=10090 GN=Ntrk2	NaN	NaN	NaN	NaN	9	NaN	NaN	NaN	NaN	NaN	NaN	NaN	NaN	NaN	NaN	#DIV/0!	#DIV/0!	1	0	0	12	21	772
1515	>sp|Q8C437|PEX5R_MOUSE PEX5-related protein OS=Mus musculus OX=10090 GN=Pex5l PE=1 SV=2	9	NaN	NaN	12	NaN	NaN	NaN	NaN	NaN	NaN	NaN	NaN	NaN	NaN	NaN	#DIV/0!	#DIV/0!	2	0	0	12	21	567
1516	>tr|A0A087WPD1|A0A087WPD1_MOUSE Regulator of G-protein-signaling 6 OS=Mus musculus OX=10090 GN=Rgs6 PE=1 SV=1	NaN	9	12	NaN	NaN	NaN	NaN	NaN	NaN	NaN	NaN	NaN	NaN	NaN	NaN	#DIV/0!	#DIV/0!	2	0	0	12	21	505
1517	>sp|Q9CPR5|RM15_MOUSE 39S ribosomal protein L15, mitochondrial OS=Mus musculus OX=10090 GN=Mrpl15 PE=1 SV=1	NaN	12	1	NaN	NaN	1	1	NaN	NaN	1	1	NaN	NaN	NaN	NaN	0.153846	0.272228	2	3	0	12	17	295
1518	>sp|Q8BIZ1-2|ANS1B_MOUSE Isoform 2 of Ankyrin repeat and sterile alpha motif domain-containing protein 1B OS=Mus musculus OX=10090 GN=Anks1b	NaN	3	NaN	NaN	NaN	NaN	NaN	NaN	NaN	NaN	NaN	12	NaN	NaN	NaN	#DIV/0!	#DIV/0!	1	0	0	12	15	426
1519	>sp|Q8C854-2|MYEF2_MOUSE Isoform 4 of Myelin expression factor 2 OS=Mus musculus OX=10090 GN=Myef2	12	NaN	NaN	NaN	NaN	NaN	NaN	NaN	NaN	NaN	NaN	NaN	NaN	NaN	NaN	#DIV/0!	#DIV/0!	1	0	0	12	13	498
1520	>sp|Q80U28-2|MADD_MOUSE Isoform 2 of MAP kinase-activating death domain protein OS=Mus musculus OX=10090 GN=Madd	NaN	NaN	NaN	NaN	NaN	NaN	NaN	NaN	NaN	NaN	NaN	NaN	NaN	NaN	NaN	#DIV/0!	#DIV/0!	0	0	0	12	12	1567
1521	>tr|A0A0R4J083|A0A0R4J083_MOUSE Long-chain-specific acyl-CoA dehydrogenase, mitochondrial OS=Mus musculus OX=10090 GN=Acadl PE=1 SV=1	NaN	NaN	NaN	NaN	NaN	NaN	NaN	NaN	NaN	NaN	12	NaN	NaN	NaN	NaN	#DIV/0!	#DIV/0!	0	0	0	12	12	430
1522	>tr|A0A0R4J0Q5|A0A0R4J0Q5_MOUSE Lamin-B2 OS=Mus musculus OX=10090 GN=Lmnb2 PE=1 SV=1	NaN	NaN	NaN	NaN	NaN	12	NaN	NaN	NaN	NaN	NaN	NaN	NaN	NaN	NaN	#DIV/0!	#DIV/0!	0	1	0	12	12	615
1523	>tr|A0A2C9F2C1|A0A2C9F2C1_MOUSE Synaptotagmin-7 OS=Mus musculus OX=10090 GN=Syt7 PE=1 SV=1	NaN	NaN	NaN	NaN	NaN	NaN	NaN	NaN	NaN	NaN	NaN	NaN	NaN	12	NaN	#DIV/0!	#DIV/0!	0	0	0	12	12	611
1524	>tr|A2ACG7|A2ACG7_MOUSE Dolichyl-diphosphooligosaccharide--protein glycosyltransferase subunit 2 OS=Mus musculus OX=10090 GN=Rpn2 PE=1 SV=1	NaN	NaN	NaN	NaN	NaN	NaN	NaN	NaN	NaN	NaN	NaN	NaN	12	NaN	NaN	#DIV/0!	#DIV/0!	0	0	0	12	12	615
1525	>tr|A2BI12|A2BI12_MOUSE PC4 and SFRS1-interacting protein OS=Mus musculus OX=10090 GN=Psip1 PE=1 SV=1	NaN	NaN	12	NaN	NaN	NaN	NaN	NaN	NaN	NaN	NaN	NaN	NaN	NaN	NaN	#DIV/0!	#DIV/0!	1	0	0	12	12	327
1526	>tr|B1AX58|B1AX58_MOUSE Plastin-3 OS=Mus musculus OX=10090 GN=Pls3 PE=1 SV=1	NaN	NaN	NaN	NaN	NaN	NaN	NaN	NaN	NaN	NaN	NaN	NaN	NaN	NaN	NaN	#DIV/0!	#DIV/0!	0	0	0	12	12	639
1527	>tr|B7ZBY7|B7ZBY7_MOUSE Ubiquitin-conjugating enzyme E2 variant 1 OS=Mus musculus OX=10090 GN=Ube2v1 PE=4 SV=1	NaN	NaN	NaN	NaN	NaN	NaN	NaN	NaN	NaN	NaN	NaN	12	NaN	NaN	NaN	#DIV/0!	#DIV/0!	0	0	0	12	12	173
1528	>tr|E9PY39|E9PY39_MOUSE Predicted gene 20431 OS=Mus musculus OX=10090 GN=Gm20431 PE=4 SV=1	NaN	NaN	NaN	NaN	NaN	NaN	NaN	NaN	NaN	NaN	12	NaN	NaN	NaN	NaN	#DIV/0!	#DIV/0!	0	0	0	12	12	371
1529	>tr|E9Q2X2|E9Q2X2_MOUSE Neurexin-3-beta OS=Mus musculus OX=10090 GN=Nrxn3 PE=1 SV=1	NaN	NaN	NaN	NaN	NaN	NaN	NaN	12	NaN	NaN	NaN	NaN	NaN	NaN	NaN	#DIV/0!	#DIV/0!	0	1	0	12	12	1391
1530	>tr|S4R1I3|S4R1I3_MOUSE Xaa-Pro aminopeptidase 1 OS=Mus musculus OX=10090 GN=Xpnpep1 PE=1 SV=1	NaN	NaN	NaN	NaN	NaN	NaN	NaN	NaN	NaN	12	NaN	NaN	NaN	NaN	NaN	#DIV/0!	#DIV/0!	0	1	0	12	12	635
1531	>sp|Q03137|EPHA4_MOUSE Ephrin type-A receptor 4 OS=Mus musculus OX=10090 GN=Epha4 PE=1 SV=2	9	10	11	9	8	7	8	11	8	4	3	7	11	7	6	0.808511	0.182417	5	5	0	11	165	986
1532	>sp|Q641P0|ARP3B_MOUSE Actin-related protein 3B OS=Mus musculus OX=10090 GN=Actr3b PE=1 SV=1	8	11	10	10	9	5	11	8	8	6	7	9	6	9	9	0.791667	0.119903	5	5	0	11	163	418
1533	>sp|Q60854|SPB6_MOUSE Serpin B6 OS=Mus musculus OX=10090 GN=Serpinb6 PE=1 SV=1	7	10	9	5	9	4	7	9	11	10	9	6	11	6	7	1.025	0.899206	5	5	0	11	161	378
1534	>sp|Q925I1|ATAD3_MOUSE ATPase family AAA domain-containing protein 3 OS=Mus musculus OX=10090 GN=Atad3 PE=1 SV=1	10	10	8	9	6	6	8	9	5	11	7	11	7	10	8	0.906977	0.556538	5	5	0	11	161	591
1535	>sp|Q9Z1Z2|STRAP_MOUSE Serine-threonine kinase receptor-associated protein OS=Mus musculus OX=10090 GN=Strap PE=1 SV=2	7	10	7	10	8	8	5	10	10	7	9	7	6	11	10	0.952381	0.740439	5	5	0	11	160	350
1536	>sp|Q8R4N0|CLYBL_MOUSE Citramalyl-CoA lyase, mitochondrial OS=Mus musculus OX=10090 GN=Clybl PE=1 SV=2	9	8	6	5	8	4	11	9	7	11	9	5	9	9	7	1.16667	0.451614	5	5	0	11	158	338
1537	>sp|P26231|CTNA1_MOUSE Catenin alpha-1 OS=Mus musculus OX=10090 GN=Ctnna1 PE=1 SV=1	6	8	6	9	7	4	7	9	9	9	5	4	10	10	11	1.05556	0.73478	5	5	0	11	157	906
1538	>sp|P23116|EIF3A_MOUSE Eukaryotic translation initiation factor 3 subunit A OS=Mus musculus OX=10090 GN=Eif3a PE=1 SV=5	8	10	2	8	7	7	5	8	11	6	8	7	9	11	7	1.05714	0.818969	5	5	0	11	152	1344
1539	>sp|Q9CZ04|CSN7A_MOUSE COP9 signalosome complex subunit 7a OS=Mus musculus OX=10090 GN=Cops7a PE=1 SV=2	8	6	6	8	9	6	8	10	11	8	6	4	4	6	10	1.16216	0.289672	5	5	0	11	152	275
1540	>sp|Q9WUR9|KAD4_MOUSE Adenylate kinase 4, mitochondrial OS=Mus musculus OX=10090 GN=Ak4 PE=1 SV=1	11	9	6	8	5	7	1	9	4	8	9	10	9	6	10	0.74359	0.301561	5	5	0	11	152	223
1541	>sp|Q9WVK4|EHD1_MOUSE EH domain-containing protein 1 OS=Mus musculus OX=10090 GN=Ehd1 PE=1 SV=1	9	8	9	6	6	7	7	7	8	7	5	8	6	8	9	0.947368	0.587119	5	5	0	11	150	534
1542	>sp|Q6ZWV3|RL10_MOUSE 60S ribosomal protein L10 OS=Mus musculus OX=10090 GN=Rpl10 PE=1 SV=3	8	9	6	9	11	4	5	9	4	5	6	8	6	8	9	0.627907	0.0318376	5	5	0	11	149	214
1543	>sp|O35633|VIAAT_MOUSE Vesicular inhibitory amino acid transporter OS=Mus musculus OX=10090 GN=Slc32a1 PE=1 SV=3	6	10	5	8	8	3	8	7	10	5	6	10	11	7	5	0.891892	0.605926	5	5	0	11	148	525
1544	>sp|Q99KP6|PRP19_MOUSE Pre-mRNA-processing factor 19 OS=Mus musculus OX=10090 GN=Prpf19 PE=1 SV=1	7	11	6	6	8	5	7	10	4	9	11	9	7	5	5	0.921053	0.6938	5	5	0	11	147	504
1545	>sp|Q9CPW4|ARPC5_MOUSE Actin-related protein 2/3 complex subunit 5 OS=Mus musculus OX=10090 GN=Arpc5 PE=1 SV=3	8	11	9	7	4	8	6	6	7	8	8	5	6	9	7	0.897436	0.537191	5	5	0	11	147	151
1546	>sp|Q9CQW1|YKT6_MOUSE Synaptobrevin homolog YKT6 OS=Mus musculus OX=10090 GN=Ykt6 PE=1 SV=1	3	8	8	4	11	6	10	9	7	6	8	9	8	7	8	1.11765	0.645376	5	5	0	11	147	198
1547	>sp|P62869|ELOB_MOUSE Elongin-B OS=Mus musculus OX=10090 GN=Elob PE=1 SV=1	8	6	6	6	9	5	9	7	7	9	5	7	6	7	8	1.05714	0.6938	5	5	0	11	145	118
1548	>sp|Q9JLJ2|AL9A1_MOUSE 4-trimethylaminobutyraldehyde dehydrogenase OS=Mus musculus OX=10090 GN=Aldh9a1 PE=1 SV=1	9	10	6	8	11	4	5	7	11	9	7	3	5	9	7	0.818182	0.330006	5	5	0	11	145	494
1549	>sp|Q8C419|GP158_MOUSE Probable G-protein coupled receptor 158 OS=Mus musculus OX=10090 GN=Gpr158 PE=1 SV=2	10	10	7	6	6	6	5	7	7	6	6	6	6	9	6	0.794872	0.144704	5	5	0	11	144	1200
1550	>sp|P14131|RS16_MOUSE 40S ribosomal protein S16 OS=Mus musculus OX=10090 GN=Rps16 PE=1 SV=4	7	6	8	7	8	6	8	7	10	7	7	7	6	8	10	1.05556	0.619544	5	5	0	11	143	146
1551	>sp|Q9DB72|BTBDH_MOUSE BTB/POZ domain-containing protein 17 OS=Mus musculus OX=10090 GN=Btbd17 PE=1 SV=1	5	8	10	9	7	4	8	8	11	6	4	5	8	4	7	0.948718	0.789524	5	5	0	11	142	478
1552	>sp|Q921G7|ETFD_MOUSE Electron transfer flavoprotein-ubiquinone oxidoreductase, mitochondrial OS=Mus musculus OX=10090 GN=Etfdh PE=1 SV=1	7	8	6	11	4	7	5	7	8	6	5	5	8	11	8	0.916667	0.647934	5	5	0	11	141	616
1553	>sp|P16332|MUTA_MOUSE Methylmalonyl-CoA mutase, mitochondrial OS=Mus musculus OX=10090 GN=Mmut PE=1 SV=2	5	10	9	11	6	4	4	11	9	9	6	6	6	9	5	0.902439	0.675852	5	5	0	11	139	748
1554	>sp|Q8BW96|KCC1D_MOUSE Calcium/calmodulin-dependent protein kinase type 1D OS=Mus musculus OX=10090 GN=Camk1d PE=1 SV=2	8	6	9	7	7	5	2	8	7	5	8	7	8	10	10	0.72973	0.119903	5	5	0	11	138	385
1555	>sp|Q9DCL9|PUR6_MOUSE Multifunctional protein ADE2 OS=Mus musculus OX=10090 GN=Paics PE=1 SV=4	4	7	8	9	7	8	9	11	8	5	6	6	10	5	7	1.17143	0.376158	5	5	0	11	138	425
1556	>sp|O88696|CLPP_MOUSE ATP-dependent Clp protease proteolytic subunit, mitochondrial OS=Mus musculus OX=10090 GN=Clpp PE=1 SV=1	9	5	9	11	9	10	3	6	6	5	4	3	8	9	9	0.697674	0.121976	5	5	0	11	137	272
1557	>sp|Q8R326|PSPC1_MOUSE Paraspeckle component 1 OS=Mus musculus OX=10090 GN=Pspc1 PE=1 SV=1	10	9	9	10	8	3	5	9	5	NaN	7	6	5	6	6	0.597826	0.0167151	5	4	0	11	136	523
1558	>sp|Q91XU3|PI42C_MOUSE Phosphatidylinositol 5-phosphate 4-kinase type-2 gamma OS=Mus musculus OX=10090 GN=Pip4k2c PE=1 SV=1	6	6	10	9	11	6	5	8	8	7	3	7	6	4	7	0.809524	0.213278	5	5	0	11	136	421
1559	>sp|Q99MR8|MCCA_MOUSE Methylcrotonoyl-CoA carboxylase subunit alpha, mitochondrial OS=Mus musculus OX=10090 GN=Mccc1 PE=1 SV=2	8	9	11	7	5	6	2	4	5	5	4	10	8	11	6	0.55	0.017617	5	5	0	11	136	717
1560	>sp|Q9CXS4|CENPV_MOUSE Centromere protein V OS=Mus musculus OX=10090 GN=Cenpv PE=1 SV=2	7	6	4	7	11	6	8	8	7	9	10	6	4	10	7	1.08571	0.643815	5	5	0	11	135	252
1561	>sp|P34022|RANG_MOUSE Ran-specific GTPase-activating protein OS=Mus musculus OX=10090 GN=Ranbp1 PE=1 SV=2	7	11	5	8	4	2	4	7	5	5	10	8	7	6	6	0.657143	0.141113	5	5	0	11	134	203
1562	>sp|Q9CQF3|CPSF5_MOUSE Cleavage and polyadenylation specificity factor subunit 5 OS=Mus musculus OX=10090 GN=Nudt21 PE=1 SV=1	5	7	5	4	6	6	5	8	8	6	10	7	6	8	7	1.22222	0.166013	5	5	0	11	134	227
1563	>sp|P47941|CRKL_MOUSE Crk-like protein OS=Mus musculus OX=10090 GN=Crkl PE=1 SV=2	9	6	5	9	6	4	6	4	6	6	6	4	6	11	5	0.742857	0.10046	5	5	0	11	133	303
1564	>sp|O08914|FAAH1_MOUSE Fatty-acid amide hydrolase 1 OS=Mus musculus OX=10090 GN=Faah PE=1 SV=1	6	11	6	11	6	2	6	8	6	7	5	5	7	8	8	0.725	0.204804	5	5	0	11	132	579
1565	>sp|Q9WUL7|ARL3_MOUSE ADP-ribosylation factor-like protein 3 OS=Mus musculus OX=10090 GN=Arl3 PE=1 SV=1	7	7	5	4	7	4	4	11	6	5	5	8	9	4	10	1	1	5	5	0	11	132	182
1566	>sp|Q9D023|MPC2_MOUSE Mitochondrial pyruvate carrier 2 OS=Mus musculus OX=10090 GN=Mpc2 PE=1 SV=1	5	4	8	4	6	4	11	9	4	10	11	4	6	6	7	1.40741	0.226532	5	5	0	11	131	127
1567	>sp|Q9D8W7|OCAD2_MOUSE OCIA domain-containing protein 2 OS=Mus musculus OX=10090 GN=Ociad2 PE=1 SV=1	3	7	6	5	8	1	8	7	5	6	11	8	7	7	6	0.931034	0.794232	5	5	0	11	131	154
1568	>sp|O88998|NOE1_MOUSE Noelin OS=Mus musculus OX=10090 GN=Olfm1 PE=1 SV=1	4	7	6	11	5	4	3	4	8	7	4	8	6	10	4	0.787879	0.392555	5	5	0	11	130	485
1569	>sp|P62852|RS25_MOUSE 40S ribosomal protein S25 OS=Mus musculus OX=10090 GN=Rps25 PE=1 SV=1	6	8	4	11	5	6	7	4	8	4	4	1	10	10	7	0.852941	0.517328	5	5	0	11	128	125
1570	>sp|P29595|NEDD8_MOUSE NEDD8 OS=Mus musculus OX=10090 GN=Nedd8 PE=1 SV=2	6	8	6	7	3	10	6	3	5	2	11	5	6	7	4	0.866667	0.635687	5	5	0	11	127	81
1571	>sp|P84084|ARF5_MOUSE ADP-ribosylation factor 5 OS=Mus musculus OX=10090 GN=Arf5 PE=1 SV=2	3	7	6	5	9	8	8	5	6	7	4	9	5	5	8	1.13333	0.509059	5	5	0	11	127	180
1572	>sp|Q8BHE3|ATCAY_MOUSE Caytaxin OS=Mus musculus OX=10090 GN=Atcay PE=1 SV=1	11	8	6	7	5	7	5	4	10	6	4	2	5	8	7	0.864865	0.51162	5	5	0	11	127	372
1573	>sp|Q9WVJ2|PSD13_MOUSE 26S proteasome non-ATPase regulatory subunit 13 OS=Mus musculus OX=10090 GN=Psmd13 PE=1 SV=1	6	7	3	7	7	2	7	8	8	6	5	5	8	6	9	1.03333	0.886431	5	5	0	11	127	376
1574	>sp|P55088|AQP4_MOUSE Aquaporin-4 OS=Mus musculus OX=10090 GN=Aqp4 PE=1 SV=2	7	9	7	8	5	5	4	8	6	5	8	2	5	2	8	0.777778	0.130175	5	5	0	11	126	323
1575	>sp|P62315|SMD1_MOUSE Small nuclear ribonucleoprotein Sm D1 OS=Mus musculus OX=10090 GN=Snrpd1 PE=1 SV=1	5	5	7	11	5	5	7	7	9	9	5	4	3	4	5	1.12121	0.579584	5	5	0	11	125	119
1576	>sp|Q8CG76|ARK72_MOUSE Aflatoxin B1 aldehyde reductase member 2 OS=Mus musculus OX=10090 GN=Akr7a2 PE=1 SV=3	6	11	7	8	3	4	3	6	5	4	6	5	8	11	6	0.628571	0.10037	5	5	0	11	125	367
1577	>tr|Q4VA93|Q4VA93_MOUSE Protein kinase C OS=Mus musculus OX=10090 GN=Prkca PE=1 SV=1	8	6	11	5	8	5	5	6	6	5	4	5	8	7	6	0.710526	0.0712474	5	5	0	11	125	672
1578	>sp|Q5SSM3|RHG44_MOUSE Rho GTPase-activating protein 44 OS=Mus musculus OX=10090 GN=Arhgap44 PE=1 SV=1	5	6	4	9	11	NaN	7	6	6	NaN	5	3	9	7	6	0.904762	0.71719	5	3	0	11	123	814
1579	>sp|P97441|ZNT3_MOUSE Zinc transporter 3 OS=Mus musculus OX=10090 GN=Slc30a3 PE=1 SV=1	8	10	3	5	9	3	5	7	11	5	7	7	5	8	5	0.885714	0.681901	5	5	0	11	122	388
1580	>sp|Q9D0R2|SYTC_MOUSE Threonine--tRNA ligase 1, cytoplasmic OS=Mus musculus OX=10090 GN=Tars1 PE=1 SV=2	5	6	11	7	7	NaN	5	10	3	4	10	5	5	8	6	0.763889	0.373695	5	4	0	11	122	722
1581	>tr|A0A2R8VKG2|A0A2R8VKG2_MOUSE RIKEN cDNA D430041D05 gene OS=Mus musculus OX=10090 GN=D430041D05Rik PE=1 SV=1	8	10	7	9	NaN	NaN	8	8	11	NaN	8	5	11	NaN	6	1.05882	0.67738	4	3	0	11	121	2099
1582	>sp|Q00612|G6PD1_MOUSE Glucose-6-phosphate 1-dehydrogenase X OS=Mus musculus OX=10090 GN=G6pdx PE=1 SV=3	5	7	7	8	3	3	10	11	6	4	5	7	5	9	6	1.13333	0.673152	5	5	0	11	120	515
1583	>sp|Q69ZK9|NLGN2_MOUSE Neuroligin-2 OS=Mus musculus OX=10090 GN=Nlgn2 PE=1 SV=2	3	5	3	9	6	4	10	11	7	3	3	5	8	7	4	1.34615	0.37921	5	5	0	11	119	836
1584	>sp|Q8BG18|NECA1_MOUSE N-terminal EF-hand calcium-binding protein 1 OS=Mus musculus OX=10090 GN=Necab1 PE=1 SV=1	9	3	3	3	6	4	4	6	8	8	7	5	9	6	5	1.25	0.445838	5	5	0	11	119	352
1585	>sp|Q8C0E2|VP26B_MOUSE Vacuolar protein sorting-associated protein 26B OS=Mus musculus OX=10090 GN=Vps26b PE=1 SV=1	5	5	2	7	10	6	7	4	8	6	3	11	5	6	7	1.06897	0.793316	5	5	0	11	118	336
1586	>sp|Q8VHW2|CCG8_MOUSE Voltage-dependent calcium channel gamma-8 subunit OS=Mus musculus OX=10090 GN=Cacng8 PE=1 SV=1	9	3	7	11	6	4	3	7	6	7	2	4	8	5	7	0.75	0.287886	5	5	0	11	118	423
1587	>sp|Q9D5V5|CUL5_MOUSE Cullin-5 OS=Mus musculus OX=10090 GN=Cul5 PE=1 SV=3	NaN	8	7	NaN	5	2	9	10	NaN	NaN	6	7	7	11	8	1.05	0.906554	3	3	0	11	118	780
1588	>sp|P70232|NCHL1_MOUSE Neural cell adhesion molecule L1-like protein OS=Mus musculus OX=10090 GN=Chl1 PE=1 SV=2	3	7	3	7	5	4	3	2	7	4	5	6	9	5	9	0.8	0.437852	5	5	0	11	117	1209
1589	>sp|Q8BGB7|ENOPH_MOUSE Enolase-phosphatase E1 OS=Mus musculus OX=10090 GN=Enoph1 PE=1 SV=1	3	7	5	5	6	NaN	9	4	7	6	5	5	6	6	6	1.25	0.308474	5	4	0	11	117	257
1590	>sp|Q9DCH4|EIF3F_MOUSE Eukaryotic translation initiation factor 3 subunit F OS=Mus musculus OX=10090 GN=Eif3f PE=1 SV=2	8	11	5	5	5	4	2	5	6	6	8	4	6	5	4	0.676471	0.158405	5	5	0	11	117	361
1591	>sp|Q8BGD9|IF4B_MOUSE Eukaryotic translation initiation factor 4B OS=Mus musculus OX=10090 GN=Eif4b PE=1 SV=1	9	6	6	6	6	9	3	5	3	11	2	7	3	8	5	0.939394	0.823158	5	5	0	11	115	611
1592	>sp|Q99MK8|ARBK1_MOUSE Beta-adrenergic receptor kinase 1 OS=Mus musculus OX=10090 GN=Grk2 PE=1 SV=2	5	11	4	6	7	NaN	6	6	8	9	6	3	6	7	6	1.09848	0.68181	5	4	0	11	115	689
1593	>sp|P30416|FKBP4_MOUSE Peptidyl-prolyl cis-trans isomerase FKBP4 OS=Mus musculus OX=10090 GN=Fkbp4 PE=1 SV=5	5	11	5	7	3	10	4	5	6	4	2	4	4	9	5	0.935484	0.825425	5	5	0	11	113	458
1594	>sp|Q91YR1|TWF1_MOUSE Twinfilin-1 OS=Mus musculus OX=10090 GN=Twf1 PE=1 SV=2	5	3	6	3	6	8	6	3	8	4	4	7	5	5	5	1.26087	0.355884	5	5	0	11	113	350
1595	>sp|P47809|MP2K4_MOUSE Dual specificity mitogen-activated protein kinase kinase 4 OS=Mus musculus OX=10090 GN=Map2k4 PE=1 SV=2	3	7	5	7	7	3	11	5	7	4	5	4	5	6	3	1.03448	0.905071	5	5	0	11	111	397
1596	>sp|Q61036|PAK3_MOUSE Serine/threonine-protein kinase PAK 3 OS=Mus musculus OX=10090 GN=Pak3 PE=1 SV=2	5	8	9	11	6	4	5	6	5	6	3	3	5	9	NaN	0.666667	0.050621	5	5	0	11	111	559
1597	>sp|P47963|RL13_MOUSE 60S ribosomal protein L13 OS=Mus musculus OX=10090 GN=Rpl13 PE=1 SV=3	8	4	7	6	3	11	6	3	7	5	5	6	5	8	6	1.14286	0.63442	5	5	0	11	110	211
1598	>sp|O88746|TOM1_MOUSE Target of Myb protein 1 OS=Mus musculus OX=10090 GN=Tom1 PE=1 SV=1	NaN	7	11	7	3	8	NaN	11	8	5	NaN	8	6	6	9	1.14286	0.641602	4	4	0	11	106	492
1599	>sp|P97315|CSRP1_MOUSE Cysteine and glycine-rich protein 1 OS=Mus musculus OX=10090 GN=Csrp1 PE=1 SV=3	9	11	5	7	6	3	6	4	5	8	4	3	7	6	5	0.684211	0.119836	5	5	0	11	106	193
1600	>sp|P58404|STRN4_MOUSE Striatin-4 OS=Mus musculus OX=10090 GN=Strn4 PE=1 SV=2	6	4	11	6	5	5	4	6	4	6	NaN	3	5	3	3	0.78125	0.308861	5	5	0	11	105	760
1601	>sp|Q9JM52|MINK1_MOUSE Misshapen-like kinase 1 OS=Mus musculus OX=10090 GN=Mink1 PE=1 SV=3	2	3	1	10	5	NaN	6	4	7	2	3	5	11	8	6	1.13095	0.796478	5	4	0	11	105	1308
1602	>sp|Q8BML9|SYQ_MOUSE Glutamine--tRNA ligase OS=Mus musculus OX=10090 GN=Qars1 PE=1 SV=1	5	8	5	11	9	4	3	6	2	4	4	6	5	2	4	0.5	0.0220701	5	5	0	11	104	775
1603	>tr|Q78ZM0|Q78ZM0_MOUSE Sorting nexin-3 OS=Mus musculus OX=10090 GN=Snx3 PE=1 SV=1	8	3	7	NaN	11	3	4	4	4	4	6	2	4	8	10	0.524138	0.0511495	4	5	0	11	104	162
1604	>sp|P24288|BCAT1_MOUSE Branched-chain-amino-acid aminotransferase, cytosolic OS=Mus musculus OX=10090 GN=Bcat1 PE=1 SV=2	8	10	6	8	7	7	NaN	NaN	7	NaN	NaN	NaN	7	6	10	0.897436	0.503343	5	2	0	11	103	386
1605	>sp|P97492|RGS14_MOUSE Regulator of G-protein signaling 14 OS=Mus musculus OX=10090 GN=Rgs14 PE=1 SV=2	2	8	5	4	6	3	7	9	3	4	8	5	11	1	7	1.04	0.90128	5	5	0	11	103	547
1606	>sp|Q8BH04|PCKGM_MOUSE Phosphoenolpyruvate carboxykinase [GTP], mitochondrial OS=Mus musculus OX=10090 GN=Pck2 PE=1 SV=1	7	4	7	8	11	2	7	8	2	7	4	5	NaN	7	4	0.702703	0.239719	5	5	0	11	103	640
1607	>sp|Q6PFD5|DLGP3_MOUSE Disks large-associated protein 3 OS=Mus musculus OX=10090 GN=Dlgap3 PE=1 SV=1	3	8	9	7	1	3	4	4	6	6	NaN	4	7	10	NaN	0.821429	0.561097	5	5	0	11	102	977
1608	>sp|P63080|GBRB3_MOUSE Gamma-aminobutyric acid receptor subunit beta-3 OS=Mus musculus OX=10090 GN=Gabrb3 PE=1 SV=1	7	10	6	2	10	NaN	NaN	10	11	8	1	NaN	9	9	6	1.38095	0.247108	5	3	0	11	101	473
1609	>sp|Q3UVL4|VPS51_MOUSE Vacuolar protein sorting-associated protein 51 homolog OS=Mus musculus OX=10090 GN=Vps51 PE=1 SV=2	8	11	NaN	4	10	NaN	5	5	11	5	6	1	7	2	11	0.787879	0.44785	4	4	0	11	101	782
1610	>sp|P32848|PRVA_MOUSE Parvalbumin alpha OS=Mus musculus OX=10090 GN=Pvalb PE=1 SV=3	7	7	6	6	3	6	5	2	3	4	8	4	1	8	7	0.689655	0.115555	5	5	0	11	100	110
1611	>sp|Q9JKF6|NECT1_MOUSE Nectin-1 OS=Mus musculus OX=10090 GN=Nectin1 PE=1 SV=3	11	8	5	3	NaN	3	4	4	6	7	9	5	6	9	NaN	0.711111	0.301531	4	5	0	11	100	515
1612	>sp|Q9D4H8|CUL2_MOUSE Cullin-2 OS=Mus musculus OX=10090 GN=Cul2 PE=1 SV=2	3	6	5	9	3	NaN	1	4	3	5	6	7	1	4	6	0.625	0.225906	5	4	0	11	99	745
1613	>sp|Q8K274|KT3K_MOUSE Ketosamine-3-kinase OS=Mus musculus OX=10090 GN=Fn3krp PE=1 SV=2	4	11	3	4	2	8	5	5	4	5	3	6	9	5	3	1.125	0.737969	5	5	0	11	98	309
1614	>sp|Q99M71|EPDR1_MOUSE Mammalian ependymin-related protein 1 OS=Mus musculus OX=10090 GN=Epdr1 PE=1 SV=1	6	4	2	4	4	6	5	11	9	3	2	6	2	6	7	1.7	0.110813	5	5	0	11	98	224
1615	>sp|Q8BG51|MIRO1_MOUSE Mitochondrial Rho GTPase 1 OS=Mus musculus OX=10090 GN=Rhot1 PE=1 SV=1	3	5	6	11	4	3	NaN	NaN	9	6	6	5	NaN	7	3	1.03448	0.931972	5	3	0	11	92	631
1616	>sp|Q9JIF7|COPB_MOUSE Coatomer subunit beta OS=Mus musculus OX=10090 GN=Copb1 PE=1 SV=1	2	3	4	7	5	3	9	3	6	2	2	3	5	2	4	1.09524	0.802772	5	5	0	11	92	953
1617	>sp|P51855|GSHB_MOUSE Glutathione synthetase OS=Mus musculus OX=10090 GN=Gss PE=1 SV=1	4	3	6	7	5	2	1	4	6	5	11	5	3	4	4	0.72	0.264287	5	5	0	11	91	474
1618	>sp|Q62417|SRBS1_MOUSE Sorbin and SH3 domain-containing protein 1 OS=Mus musculus OX=10090 GN=Sorbs1 PE=1 SV=2	9	5	7	NaN	1	NaN	5	NaN	NaN	5	7	5	NaN	11	7	0.909091	0.854765	4	2	0	11	91	1290
1619	>sp|O88958|GNPI1_MOUSE Glucosamine-6-phosphate isomerase 1 OS=Mus musculus OX=10090 GN=Gnpda1 PE=1 SV=3	2	5	4	2	3	1	9	2	7	1	6	5	4	4	9	1.25	0.663641	5	5	0	11	90	289
1620	>sp|Q61595|KTN1_MOUSE Kinectin OS=Mus musculus OX=10090 GN=Ktn1 PE=1 SV=1	NaN	6	6	5	7	3	NaN	NaN	10	6	10	9	7	11	NaN	1.05556	0.857538	4	3	0	11	88	1327
1621	>sp|Q9D1C8|VPS28_MOUSE Vacuolar protein sorting-associated protein 28 homolog OS=Mus musculus OX=10090 GN=Vps28 PE=1 SV=1	4	5	5	2	5	2	4	7	5	3	7	11	3	4	4	1	1	5	5	0	11	88	221
1622	>sp|Q91VI7|RINI_MOUSE Ribonuclease inhibitor OS=Mus musculus OX=10090 GN=Rnh1 PE=1 SV=1	1	7	11	5	2	3	5	6	6	2	4	4	5	2	4	0.846154	0.696024	5	5	0	11	87	456
1623	>sp|Q9D1Q6|ERP44_MOUSE Endoplasmic reticulum resident protein 44 OS=Mus musculus OX=10090 GN=Erp44 PE=1 SV=1	2	9	5	4	4	1	4	3	3	5	6	5	3	3	1	0.666667	0.264742	5	5	0	11	85	406
1624	>sp|Q99JW2|ACY1_MOUSE Aminoacylase-1 OS=Mus musculus OX=10090 GN=Acy1 PE=1 SV=1	11	2	2	4	6	9	4	NaN	4	NaN	4	9	4	9	3	1.13333	0.801855	5	3	0	11	84	408
1625	>sp|O35551|RABE1_MOUSE Rab GTPase-binding effector protein 1 OS=Mus musculus OX=10090 GN=Rabep1 PE=1 SV=2	8	5	6	4	2	5	1	6	3	3	2	3	4	11	NaN	0.72	0.322117	5	5	0	11	83	862
1626	>sp|P61329|FGF12_MOUSE Fibroblast growth factor 12 OS=Mus musculus OX=10090 GN=Fgf12 PE=1 SV=1	4	6	1	2	NaN	NaN	7	3	4	7	2	2	9	6	11	1.61538	0.234595	4	4	0	11	82	243
1627	>sp|Q8R317|UBQL1_MOUSE Ubiquilin-1 OS=Mus musculus OX=10090 GN=Ubqln1 PE=1 SV=1	11	NaN	3	1	1	NaN	6	5	NaN	9	2	6	NaN	4	8	1.66667	0.41343	4	3	0	11	81	582
1628	>sp|Q9Z0V2|KCND2_MOUSE Potassium voltage-gated channel subfamily D member 2 OS=Mus musculus OX=10090 GN=Kcnd2 PE=1 SV=1	6	5	7	7	3	NaN	4	5	4	3	NaN	3	6	11	4	0.714286	0.125976	5	4	0	11	78	630
1629	>sp|Q99J85|NPTXR_MOUSE Neuronal pentraxin receptor OS=Mus musculus OX=10090 GN=Nptxr PE=1 SV=1	7	NaN	NaN	NaN	NaN	NaN	4	6	NaN	NaN	4	6	10	NaN	NaN	0.714286	#DIV/0!	1	2	0	11	74	493
1630	>tr|Q3TPJ8|Q3TPJ8_MOUSE Cytoplasmic dynein 1 intermediate chain 2 OS=Mus musculus OX=10090 GN=Dync1i2 PE=1 SV=1	8	NaN	11	NaN	NaN	NaN	NaN	10	NaN	NaN	NaN	NaN	NaN	6	NaN	1.05263	#DIV/0!	2	1	0	11	71	632
1631	>sp|Q71M36|CSPG5_MOUSE Chondroitin sulfate proteoglycan 5 OS=Mus musculus OX=10090 GN=Cspg5 PE=1 SV=2	2	4	1	2	6	9	2	6	1	2	NaN	NaN	2	2	8	1.33333	0.585644	5	5	0	11	68	566
1632	>tr|Q7M739|Q7M739_MOUSE Nuclear pore complex-associated intranuclear coiled-coil protein TPR OS=Mus musculus OX=10090 GN=Tpr PE=1 SV=1	7	11	8	5	NaN	5	NaN	NaN	NaN	NaN	5	NaN	NaN	NaN	NaN	0.645161	#DIV/0!	4	1	0	11	66	2357
1633	>sp|Q9WV80|SNX1_MOUSE Sorting nexin-1 OS=Mus musculus OX=10090 GN=Snx1 PE=1 SV=1	6	11	NaN	NaN	NaN	9	NaN	NaN	NaN	8	NaN	NaN	3	9	6	1	1	2	2	0	11	65	522
1634	>sp|P56812|PDCD5_MOUSE Programmed cell death protein 5 OS=Mus musculus OX=10090 GN=Pdcd5 PE=1 SV=3	8	4	NaN	7	NaN	11	4	3	NaN	3	4	NaN	4	4	NaN	0.828947	0.682404	3	4	0	11	62	126
1635	>tr|Q8BH40|Q8BH40_MOUSE Syntaxin-7 OS=Mus musculus OX=10090 GN=Stx7 PE=1 SV=1	8	5	5	NaN	NaN	6	NaN	NaN	6	NaN	11	6	NaN	6	8	1	1	3	2	0	11	61	261
1636	>sp|P16388|KCNA1_MOUSE Potassium voltage-gated channel subfamily A member 1 OS=Mus musculus OX=10090 GN=Kcna1 PE=1 SV=1	4	11	4	1	6	3	2	2	2	NaN	3	2	3	3	1	0.432692	0.162475	5	4	0	11	60	495
1637	>sp|Q3UGF1|WDR19_MOUSE WD repeat-containing protein 19 OS=Mus musculus OX=10090 GN=Wdr19 PE=1 SV=1	NaN	NaN	NaN	NaN	11	NaN	6	3	6	NaN	NaN	7	NaN	5	8	0.454545	#DIV/0!	1	3	0	11	60	1341
1638	>sp|Q6PHU5|SORT_MOUSE Sortilin OS=Mus musculus OX=10090 GN=Sort1 PE=1 SV=1	4	NaN	4	2	7	5	2	3	NaN	NaN	2	2	2	5	11	0.784314	0.548507	4	3	0	11	57	825
1639	>sp|Q9D2M8|UB2V2_MOUSE Ubiquitin-conjugating enzyme E2 variant 2 OS=Mus musculus OX=10090 GN=Ube2v2 PE=1 SV=4	1	2	3	5	7	2	1	1	1	1	1	1	11	1	2	0.333333	0.0598379	5	5	0	11	56	145
1640	>sp|P62245|RS15A_MOUSE 40S ribosomal protein S15a OS=Mus musculus OX=10090 GN=Rps15a PE=1 SV=2	3	3	4	5	3	3	NaN	2	11	1	1	1	NaN	6	3	1.18056	0.761448	5	4	0	11	55	130
1641	>sp|Q8CBW3-2|ABI1_MOUSE Isoform 2 of Abl interactor 1 OS=Mus musculus OX=10090 GN=Abi1	10	NaN	NaN	NaN	NaN	NaN	NaN	NaN	8	NaN	NaN	NaN	6	11	NaN	0.8	#DIV/0!	1	1	0	11	55	446
1642	>tr|A0A5F8MP96|A0A5F8MP96_MOUSE Septin-4 OS=Mus musculus OX=10090 GN=Septin4 PE=1 SV=1	3	NaN	NaN	NaN	4	NaN	7	7	NaN	10	11	NaN	NaN	NaN	2	2.28571	0.0440936	2	3	0	11	55	971
1643	>sp|P62484|ABI2_MOUSE Abl interactor 2 OS=Mus musculus OX=10090 GN=Abi2 PE=1 SV=1	NaN	8	NaN	NaN	8	9	NaN	NaN	NaN	NaN	NaN	3	NaN	NaN	NaN	1.125	#DIV/0!	2	1	0	11	53	446
1644	>sp|Q91ZU6|DYST_MOUSE Dystonin OS=Mus musculus OX=10090 GN=Dst PE=1 SV=2	NaN	7	11	NaN	NaN	8	2	NaN	NaN	NaN	NaN	NaN	NaN	NaN	8	0.555556	0.382787	2	2	0	11	53	7393
1645	>tr|A0A0R4J094|A0A0R4J094_MOUSE Fumarylacetoacetate hydrolase domain-containing 2A OS=Mus musculus OX=10090 GN=Fahd2a PE=1 SV=1	NaN	NaN	NaN	NaN	NaN	8	NaN	NaN	10	11	NaN	NaN	NaN	NaN	NaN	#DIV/0!	#DIV/0!	0	3	0	11	53	313
1646	>tr|Q8CBC8|Q8CBC8_MOUSE Branched-chain-amino-acid aminotransferase OS=Mus musculus OX=10090 GN=Bcat1 PE=1 SV=1	NaN	NaN	NaN	NaN	NaN	NaN	7	7	NaN	4	10	7	NaN	NaN	NaN	#DIV/0!	#DIV/0!	0	3	0	11	51	453
1647	>tr|E9QM90|E9QM90_MOUSE RAB11-binding protein RELCH OS=Mus musculus OX=10090 GN=Relch PE=1 SV=2	10	11	NaN	NaN	NaN	7	NaN	NaN	NaN	NaN	NaN	NaN	NaN	8	NaN	0.666667	#DIV/0!	2	1	0	11	46	1216
1648	>sp|Q7M6Y3-5|PICAL_MOUSE Isoform 5 of Phosphatidylinositol-binding clathrin assembly protein OS=Mus musculus OX=10090 GN=Picalm	NaN	7	NaN	NaN	NaN	NaN	NaN	8	NaN	NaN	NaN	11	NaN	1	NaN	1.14286	#DIV/0!	1	1	0	11	43	655
1649	>tr|Q20BD0|Q20BD0_MOUSE Heterogeneous nuclear ribonucleoprotein A/B OS=Mus musculus OX=10090 GN=Hnrnpab PE=1 SV=1	4	NaN	NaN	NaN	NaN	7	NaN	NaN	NaN	NaN	NaN	NaN	NaN	NaN	10	1.75	#DIV/0!	1	1	0	11	42	332
1650	>sp|Q2PFD7|PSD3_MOUSE PH and SEC7 domain-containing protein 3 OS=Mus musculus OX=10090 GN=Psd3 PE=1 SV=2	2	NaN	NaN	NaN	7	NaN	NaN	9	11	NaN	NaN	NaN	NaN	7	NaN	2.22222	0.177821	2	2	0	11	39	1037
1651	>tr|E9QAD8|E9QAD8_MOUSE IQ motif and SEC7 domain-containing protein 2 OS=Mus musculus OX=10090 GN=Iqsec2 PE=1 SV=1	NaN	NaN	NaN	NaN	NaN	NaN	NaN	NaN	4	NaN	NaN	NaN	9	NaN	NaN	#DIV/0!	#DIV/0!	0	1	0	11	37	1488
1652	>sp|Q91ZI0|CELR3_MOUSE Cadherin EGF LAG seven-pass G-type receptor 3 OS=Mus musculus OX=10090 GN=Celsr3 PE=2 SV=2	NaN	NaN	5	NaN	NaN	NaN	NaN	NaN	NaN	NaN	8	NaN	NaN	9	NaN	#DIV/0!	#DIV/0!	1	0	0	11	33	3301
1653	>tr|B2RQ80|B2RQ80_MOUSE Tnik protein OS=Mus musculus OX=10090 GN=Tnik PE=1 SV=1	NaN	NaN	NaN	NaN	10	NaN	NaN	NaN	NaN	NaN	NaN	NaN	9	NaN	NaN	#DIV/0!	#DIV/0!	1	0	0	11	33	1360
1654	>sp|P84309-2|ADCY5_MOUSE Isoform 2 of Adenylate cyclase type 5 OS=Mus musculus OX=10090 GN=Adcy5	8	NaN	NaN	NaN	NaN	NaN	NaN	3	NaN	NaN	NaN	NaN	NaN	NaN	11	0.375	#DIV/0!	1	1	0	11	31	1348
1655	>sp|Q9CZ44-3|NSF1C_MOUSE Isoform 3 of NSFL1 cofactor p47 OS=Mus musculus OX=10090 GN=Nsfl1c	NaN	10	NaN	NaN	NaN	10	11	NaN	NaN	NaN	NaN	NaN	NaN	NaN	NaN	1.05	#DIV/0!	1	2	0	11	31	372
1656	>tr|Q80XR6|Q80XR6_MOUSE Heterogeneous nuclear ribonucleoprotein A/B OS=Mus musculus OX=10090 GN=Hnrnpab PE=1 SV=1	NaN	NaN	NaN	7	NaN	NaN	11	NaN	6	NaN	NaN	NaN	7	NaN	NaN	1.21429	#DIV/0!	1	2	0	11	31	311
1657	>tr|D3Z5R8|D3Z5R8_MOUSE 40S ribosomal protein S19 (Fragment) OS=Mus musculus OX=10090 GN=Rps19 PE=1 SV=8	NaN	11	NaN	NaN	NaN	NaN	NaN	NaN	11	NaN	NaN	NaN	NaN	NaN	NaN	1	#DIV/0!	1	1	0	11	30	176
1658	>sp|E9Q309|CE350_MOUSE Centrosome-associated protein 350 OS=Mus musculus OX=10090 GN=Cep350 PE=1 SV=1	NaN	11	11	NaN	NaN	NaN	NaN	NaN	NaN	NaN	NaN	6	NaN	NaN	NaN	#DIV/0!	#DIV/0!	2	0	0	11	28	3095
1659	>tr|F7C846|F7C846_MOUSE Metaxin-1 OS=Mus musculus OX=10090 GN=Mtx1 PE=1 SV=1	4	11	NaN	NaN	NaN	NaN	NaN	8	NaN	3	NaN	NaN	NaN	NaN	NaN	0.733333	0.687652	2	2	0	11	26	461
1660	>sp|Q64522|H2A2B_MOUSE Histone H2A type 2-B OS=Mus musculus OX=10090 GN=H2ac21 PE=1 SV=3	6	8	NaN	NaN	NaN	NaN	NaN	NaN	NaN	11	NaN	NaN	NaN	NaN	NaN	1.57143	#DIV/0!	2	1	0	11	25	130
1661	>tr|A2AVX1|A2AVX1_MOUSE Breast carcinoma-amplified sequence 1 homolog OS=Mus musculus OX=10090 GN=Bcas1 PE=1 SV=1	NaN	NaN	NaN	NaN	NaN	8	NaN	NaN	NaN	NaN	NaN	NaN	NaN	11	NaN	#DIV/0!	#DIV/0!	0	1	0	11	25	577
1662	>sp|O70167|P3C2G_MOUSE Phosphatidylinositol 4-phosphate 3-kinase C2 domain-containing subunit gamma OS=Mus musculus OX=10090 GN=Pik3c2g PE=2 SV=1	NaN	NaN	NaN	NaN	NaN	NaN	9	11	NaN	NaN	NaN	NaN	NaN	NaN	NaN	#DIV/0!	#DIV/0!	0	2	0	11	20	1506
1663	>sp|Q6P9K9-2|NRX3A_MOUSE Isoform 2a of Neurexin-3 OS=Mus musculus OX=10090 GN=Nrxn3	11	NaN	9	NaN	NaN	NaN	NaN	NaN	NaN	NaN	NaN	NaN	NaN	NaN	NaN	#DIV/0!	#DIV/0!	2	0	0	11	20	1100
1664	>sp|Q9WV02|RBMX_MOUSE RNA-binding motif protein, X chromosome OS=Mus musculus OX=10090 GN=Rbmx PE=1 SV=1	NaN	NaN	NaN	NaN	NaN	11	NaN	NaN	8	NaN	NaN	NaN	NaN	NaN	NaN	#DIV/0!	#DIV/0!	0	2	0	11	20	391
1665	>tr|Q8K1K2|Q8K1K2_MOUSE 26S proteasome regulatory subunit 8 OS=Mus musculus OX=10090 GN=Psmc5 PE=1 SV=1	NaN	NaN	NaN	NaN	NaN	NaN	NaN	NaN	11	NaN	NaN	NaN	NaN	NaN	NaN	#DIV/0!	#DIV/0!	0	1	0	11	20	348
1666	>sp|Q923T9-2|KCC2G_MOUSE Isoform 2 of Calcium/calmodulin-dependent protein kinase type II subunit gamma OS=Mus musculus OX=10090 GN=Camk2g	NaN	NaN	NaN	NaN	NaN	NaN	NaN	NaN	NaN	NaN	NaN	NaN	NaN	7	11	#DIV/0!	#DIV/0!	0	0	0	11	18	518
1667	>sp|Q9CS84-2|NRX1A_MOUSE Isoform 2a of Neurexin-1 OS=Mus musculus OX=10090 GN=Nrxn1	NaN	NaN	11	NaN	NaN	NaN	NaN	NaN	NaN	NaN	NaN	NaN	7	NaN	NaN	#DIV/0!	#DIV/0!	1	0	0	11	18	1507
1668	>tr|A0A0G2JFZ5|A0A0G2JFZ5_MOUSE Leucine-rich repeat-containing protein 7 (Fragment) OS=Mus musculus OX=10090 GN=Lrrc7 PE=1 SV=1	NaN	NaN	NaN	NaN	NaN	NaN	NaN	NaN	11	NaN	NaN	NaN	NaN	NaN	NaN	#DIV/0!	#DIV/0!	0	1	0	11	14	1531
1669	>sp|P13808|B3A2_MOUSE Anion exchange protein 2 OS=Mus musculus OX=10090 GN=Slc4a2 PE=1 SV=1	NaN	NaN	NaN	NaN	NaN	NaN	NaN	NaN	NaN	NaN	NaN	NaN	NaN	NaN	NaN	#DIV/0!	#DIV/0!	0	0	0	11	11	1237
1670	>sp|Q64487-6|PTPRD_MOUSE Isoform F of Receptor-type tyrosine-protein phosphatase delta OS=Mus musculus OX=10090 GN=Ptprd	NaN	NaN	NaN	NaN	NaN	NaN	NaN	NaN	NaN	NaN	NaN	NaN	NaN	NaN	NaN	#DIV/0!	#DIV/0!	0	0	0	11	11	1909
1671	>sp|Q6ZPE2-2|MTMR5_MOUSE Isoform 2 of Myotubularin-related protein 5 OS=Mus musculus OX=10090 GN=Sbf1	NaN	NaN	NaN	NaN	NaN	NaN	NaN	NaN	NaN	NaN	11	NaN	NaN	NaN	NaN	#DIV/0!	#DIV/0!	0	0	0	11	11	1893
1672	>sp|Q8BIZ1-4|ANS1B_MOUSE Isoform 4 of Ankyrin repeat and sterile alpha motif domain-containing protein 1B OS=Mus musculus OX=10090 GN=Anks1b	NaN	NaN	NaN	NaN	NaN	NaN	NaN	NaN	NaN	NaN	NaN	NaN	NaN	NaN	11	#DIV/0!	#DIV/0!	0	0	0	11	11	451
1673	>sp|Q91ZU6-3|DYST_MOUSE Isoform 3 of Dystonin OS=Mus musculus OX=10090 GN=Dst	NaN	NaN	NaN	NaN	NaN	NaN	NaN	NaN	NaN	NaN	NaN	11	NaN	NaN	NaN	#DIV/0!	#DIV/0!	0	0	0	11	11	7400
1674	>tr|A2AGI2|A2AGI2_MOUSE Neuroligin-3 OS=Mus musculus OX=10090 GN=Nlgn3 PE=1 SV=1	NaN	NaN	NaN	NaN	NaN	NaN	NaN	NaN	11	NaN	NaN	NaN	NaN	NaN	NaN	#DIV/0!	#DIV/0!	0	1	0	11	11	845
1675	>tr|A7E1Z5|A7E1Z5_MOUSE Anion exchange protein OS=Mus musculus OX=10090 GN=Slc4a4 PE=1 SV=1	NaN	NaN	NaN	NaN	NaN	NaN	NaN	NaN	NaN	NaN	NaN	NaN	NaN	NaN	NaN	#DIV/0!	#DIV/0!	0	0	0	11	11	1070
1676	>tr|B1AWD8|B1AWD8_MOUSE Clathrin light chain OS=Mus musculus OX=10090 GN=Clta PE=1 SV=1	NaN	NaN	NaN	NaN	NaN	NaN	NaN	NaN	NaN	11	NaN	NaN	NaN	NaN	NaN	#DIV/0!	#DIV/0!	0	1	0	11	11	236
1677	>tr|D3YVT9|D3YVT9_MOUSE Adhesion G protein-coupled receptor L3 OS=Mus musculus OX=10090 GN=Adgrl3 PE=1 SV=1	NaN	NaN	NaN	11	NaN	NaN	NaN	NaN	NaN	NaN	NaN	NaN	NaN	NaN	NaN	#DIV/0!	#DIV/0!	1	0	0	11	11	1550
1678	>tr|D3Z0M6|D3Z0M6_MOUSE Cytoplasmic dynein 1 intermediate chain 1 OS=Mus musculus OX=10090 GN=Dync1i1 PE=1 SV=1	NaN	NaN	NaN	11	NaN	NaN	NaN	NaN	NaN	NaN	NaN	NaN	NaN	NaN	NaN	#DIV/0!	#DIV/0!	1	0	0	11	11	645
1679	>tr|E0CXB2|E0CXB2_MOUSE Importin-9 OS=Mus musculus OX=10090 GN=Ipo9 PE=1 SV=1	NaN	NaN	NaN	NaN	NaN	NaN	NaN	NaN	NaN	NaN	NaN	NaN	NaN	NaN	11	#DIV/0!	#DIV/0!	0	0	0	11	11	655
1680	>tr|E9PVC5|E9PVC5_MOUSE Eukaryotic translation initiation factor 4 gamma 1 OS=Mus musculus OX=10090 GN=Eif4g1 PE=1 SV=1	NaN	11	NaN	NaN	NaN	NaN	NaN	NaN	NaN	NaN	NaN	NaN	NaN	NaN	NaN	#DIV/0!	#DIV/0!	1	0	0	11	11	1594
1681	>tr|E9PVW8|E9PVW8_MOUSE Receptor-type tyrosine-protein phosphatase delta OS=Mus musculus OX=10090 GN=Ptprd PE=1 SV=2	NaN	NaN	NaN	NaN	NaN	NaN	NaN	11	NaN	NaN	NaN	NaN	NaN	NaN	NaN	#DIV/0!	#DIV/0!	0	1	0	11	11	1506
1682	>tr|E9Q3B9|E9Q3B9_MOUSE Monoglyceride lipase OS=Mus musculus OX=10090 GN=Mgll PE=1 SV=1	NaN	NaN	NaN	NaN	NaN	NaN	NaN	NaN	NaN	NaN	NaN	11	NaN	NaN	NaN	#DIV/0!	#DIV/0!	0	0	0	11	11	319
1683	>tr|E9Q4K0|E9Q4K0_MOUSE Actin-binding LIM protein 2 OS=Mus musculus OX=10090 GN=Ablim2 PE=1 SV=1	NaN	NaN	11	NaN	NaN	NaN	NaN	NaN	NaN	NaN	NaN	NaN	NaN	NaN	NaN	#DIV/0!	#DIV/0!	1	0	0	11	11	664
1684	>tr|F6U7V1|F6U7V1_MOUSE Ryanodine receptor 2 OS=Mus musculus OX=10090 GN=Ryr2 PE=1 SV=1	NaN	NaN	NaN	NaN	NaN	NaN	NaN	NaN	NaN	NaN	NaN	NaN	NaN	NaN	NaN	#DIV/0!	#DIV/0!	0	0	0	11	11	4966
1685	>tr|Q3UE92|Q3UE92_MOUSE Xaa-Pro aminopeptidase 1 OS=Mus musculus OX=10090 GN=Xpnpep1 PE=1 SV=1	NaN	NaN	NaN	NaN	NaN	NaN	NaN	NaN	NaN	NaN	NaN	NaN	NaN	NaN	NaN	#DIV/0!	#DIV/0!	0	0	0	11	11	666
1686	>tr|Q8VCV2|Q8VCV2_MOUSE Ndrg3 protein OS=Mus musculus OX=10090 GN=Ndrg3 PE=1 SV=1	NaN	NaN	NaN	NaN	NaN	NaN	NaN	NaN	NaN	NaN	NaN	11	NaN	NaN	NaN	#DIV/0!	#DIV/0!	0	0	0	11	11	388
1687	>sp|P52196|THTR_MOUSE Thiosulfate sulfurtransferase OS=Mus musculus OX=10090 GN=Tst PE=1 SV=3	9	7	5	5	9	10	8	10	7	10	8	7	6	9	10	1.28571	0.105322	5	5	0	10	158	297
1688	>sp|Q9QYA2|TOM40_MOUSE Mitochondrial import receptor subunit TOM40 homolog OS=Mus musculus OX=10090 GN=Tomm40 PE=1 SV=3	5	9	10	7	10	5	7	8	10	8	10	4	7	10	8	0.926829	0.647934	5	5	0	10	158	361
1689	>sp|P24369|PPIB_MOUSE Peptidyl-prolyl cis-trans isomerase B OS=Mus musculus OX=10090 GN=Ppib PE=1 SV=2	7	8	5	5	10	9	10	10	10	7	10	6	4	8	10	1.31429	0.0836086	5	5	0	10	157	216
1690	>sp|P67871|CSK2B_MOUSE Casein kinase II subunit beta OS=Mus musculus OX=10090 GN=Csnk2b PE=1 SV=1	10	10	5	9	9	5	8	10	8	8	10	5	4	6	9	0.906977	0.531949	5	5	0	10	154	215
1691	>sp|Q9DCZ4|MIC26_MOUSE MICOS complex subunit Mic26 OS=Mus musculus OX=10090 GN=Apoo PE=1 SV=2	6	9	6	6	7	5	9	9	10	7	9	7	4	8	9	1.17647	0.293645	5	5	0	10	149	198
1692	>sp|Q64674|SPEE_MOUSE Spermidine synthase OS=Mus musculus OX=10090 GN=Srm PE=1 SV=1	7	7	8	8	7	9	6	7	8	8	9	7	7	7	10	1.02703	0.73281	5	5	0	10	147	302
1693	>sp|Q8BGN3|ENPP6_MOUSE Glycerophosphocholine cholinephosphodiesterase ENPP6 OS=Mus musculus OX=10090 GN=Enpp6 PE=1 SV=1	10	10	6	10	6	4	8	8	10	7	6	10	6	6	8	0.880952	0.491038	5	5	0	10	147	440
1694	>sp|Q9JKY5|HIP1R_MOUSE Huntingtin-interacting protein 1-related protein OS=Mus musculus OX=10090 GN=Hip1r PE=1 SV=2	6	9	9	7	7	3	4	7	5	10	8	7	9	10	5	0.763158	0.227898	5	5	0	10	144	1068
1695	>sp|Q6GQS1|SCMC3_MOUSE Calcium-binding mitochondrial carrier protein SCaMC-3 OS=Mus musculus OX=10090 GN=Slc25a23 PE=1 SV=1	6	8	5	9	10	3	8	10	7	3	7	5	7	9	8	0.815789	0.427067	5	5	0	10	143	467
1696	>sp|P28474|ADHX_MOUSE Alcohol dehydrogenase class-3 OS=Mus musculus OX=10090 GN=Adh5 PE=1 SV=3	9	9	6	6	5	5	10	6	7	8	10	10	5	7	7	1.02857	0.871768	5	5	0	10	141	374
1697	>sp|Q99KB8|GLO2_MOUSE Hydroxyacylglutathione hydrolase, mitochondrial OS=Mus musculus OX=10090 GN=Hagh PE=1 SV=2	6	8	9	4	8	7	6	5	4	10	7	6	4	10	7	0.914286	0.671623	5	5	0	10	139	309
1698	>sp|Q9CQZ5|NDUA6_MOUSE NADH dehydrogenase [ubiquinone] 1 alpha subcomplex subunit 6 OS=Mus musculus OX=10090 GN=Ndufa6 PE=1 SV=1	7	5	9	8	8	10	7	3	4	8	4	5	6	8	8	0.864865	0.51162	5	5	0	10	139	131
1699	>sp|Q61081|CDC37_MOUSE Hsp90 co-chaperone Cdc37 OS=Mus musculus OX=10090 GN=Cdc37 PE=1 SV=1	9	8	10	7	8	8	5	8	6	6	6	6	6	9	6	0.785714	0.0515858	5	5	0	10	138	379
1700	>sp|O88543|CSN3_MOUSE COP9 signalosome complex subunit 3 OS=Mus musculus OX=10090 GN=Cops3 PE=1 SV=3	4	9	10	10	9	1	7	7	7	8	6	8	6	4	8	0.714286	0.193621	5	5	0	10	137	423
1701	>sp|Q99LY9|NDUS5_MOUSE NADH dehydrogenase [ubiquinone] iron-sulfur protein 5 OS=Mus musculus OX=10090 GN=Ndufs5 PE=1 SV=3	7	4	10	8	8	5	5	5	4	7	5	2	9	6	9	0.702703	0.0794854	5	5	0	10	136	106
1702	>sp|P26369|U2AF2_MOUSE Splicing factor U2AF 65 kDa subunit OS=Mus musculus OX=10090 GN=U2af2 PE=1 SV=3	5	10	8	6	6	4	5	7	7	6	7	8	5	6	6	0.828571	0.293645	5	5	0	10	135	475
1703	>sp|Q99JP7|GGT7_MOUSE Glutathione hydrolase 7 OS=Mus musculus OX=10090 GN=Ggt7 PE=1 SV=2	6	6	3	6	6	4	7	7	8	7	4	9	7	6	4	1.22222	0.221708	5	5	0	10	134	662
1704	>sp|Q99KQ4|NAMPT_MOUSE Nicotinamide phosphoribosyltransferase OS=Mus musculus OX=10090 GN=Nampt PE=1 SV=1	9	7	8	5	6	5	5	4	5	9	5	4	7	8	5	0.8	0.247591	5	5	0	10	133	491
1705	>sp|Q99KX1|MLF2_MOUSE Myeloid leukemia factor 2 OS=Mus musculus OX=10090 GN=Mlf2 PE=1 SV=1	9	6	3	6	4	NaN	8	4	5	10	7	9	8	9	4	1.20536	0.515874	5	4	0	10	133	247
1706	>sp|O55022|PGRC1_MOUSE Membrane-associated progesterone receptor component 1 OS=Mus musculus OX=10090 GN=Pgrmc1 PE=1 SV=4	8	8	5	4	5	7	6	8	7	3	4	9	7	7	5	1.03333	0.871768	5	5	0	10	132	195
1707	>sp|P22892|AP1G1_MOUSE AP-1 complex subunit gamma-1 OS=Mus musculus OX=10090 GN=Ap1g1 PE=1 SV=3	2	6	6	4	7	2	7	10	10	6	7	8	8	6	6	1.4	0.281537	5	5	0	10	132	822
1708	>sp|Q812A2|SRGP3_MOUSE SLIT-ROBO Rho GTPase-activating protein 3 OS=Mus musculus OX=10090 GN=Srgap3 PE=1 SV=1	8	8	7	10	8	2	10	NaN	NaN	5	5	9	10	10	8	0.691057	0.21443	5	3	0	10	132	1099
1709	>tr|Q9Z1A1|Q9Z1A1_MOUSE TFG protein OS=Mus musculus OX=10090 GN=Tfg PE=1 SV=1	4	5	3	6	6	6	9	7	6	4	9	8	10	5	3	1.33333	0.148266	5	5	0	10	132	397
1710	>sp|O70172|PI42A_MOUSE Phosphatidylinositol 5-phosphate 4-kinase type-2 alpha OS=Mus musculus OX=10090 GN=Pip4k2a PE=1 SV=1	8	8	5	9	5	3	4	10	8	6	8	5	5	6	8	0.885714	0.615162	5	5	0	10	131	405
1711	>sp|Q8VHL1|SETD7_MOUSE Histone-lysine N-methyltransferase SETD7 OS=Mus musculus OX=10090 GN=Setd7 PE=1 SV=2	7	6	10	6	6	7	3	4	5	9	7	7	7	8	5	0.8	0.322117	5	5	0	10	130	366
1712	>sp|Q99J08|S14L2_MOUSE SEC14-like protein 2 OS=Mus musculus OX=10090 GN=Sec14l2 PE=1 SV=1	7	10	9	6	6	4	3	9	3	4	9	7	6	8	5	0.605263	0.0622959	5	5	0	10	129	403
1713	>sp|Q9WTL7|LYPA2_MOUSE Acyl-protein thioesterase 2 OS=Mus musculus OX=10090 GN=Lypla2 PE=1 SV=1	4	5	7	5	4	3	8	10	5	7	8	7	9	8	5	1.32	0.262255	5	5	0	10	129	231
1714	>sp|P47911|RL6_MOUSE 60S ribosomal protein L6 OS=Mus musculus OX=10090 GN=Rpl6 PE=1 SV=3	7	8	10	9	9	10	5	9	7	2	7	8	3	4	5	0.767442	0.225572	5	5	0	10	128	296
1715	>sp|Q6P4T2|U520_MOUSE U5 small nuclear ribonucleoprotein 200 kDa helicase OS=Mus musculus OX=10090 GN=Snrnp200 PE=1 SV=1	3	5	3	10	10	1	6	7	8	3	6	8	9	9	9	0.806452	0.576101	5	5	0	10	127	2136
1716	>tr|G5E895|G5E895_MOUSE Aldo-keto reductase family 1, member B10 (aldose reductase) OS=Mus musculus OX=10090 GN=Akr1b10 PE=1 SV=1	7	9	6	10	6	5	7	5	7	8	9	5	7	8	10	0.842105	0.268838	5	5	0	10	127	316
1717	>sp|P35979|RL12_MOUSE 60S ribosomal protein L12 OS=Mus musculus OX=10090 GN=Rpl12 PE=1 SV=2	5	8	5	7	9	8	4	6	5	4	7	5	4	7	7	0.794118	0.237076	5	5	0	10	126	165
1718	>sp|Q8CBE3|WDR37_MOUSE WD repeat-containing protein 37 OS=Mus musculus OX=10090 GN=Wdr37 PE=1 SV=1	6	9	6	9	4	5	5	9	6	7	8	10	8	4	6	0.941176	0.752352	5	5	0	10	126	496
1719	>sp|Q91VR7|MLP3A_MOUSE Microtubule-associated proteins 1A/1B light chain 3A OS=Mus musculus OX=10090 GN=Map1lc3a PE=1 SV=1	4	6	1	9	6	7	5	5	10	7	6	1	9	8	6	1.30769	0.348365	5	5	0	10	126	121
1720	>sp|Q80WJ7|LYRIC_MOUSE Protein LYRIC OS=Mus musculus OX=10090 GN=Mtdh PE=1 SV=1	8	5	9	9	5	7	7	3	7	8	2	2	7	10	5	0.888889	0.544737	5	5	0	10	124	579
1721	>sp|Q62426|CYTB_MOUSE Cystatin-B OS=Mus musculus OX=10090 GN=Cstb PE=1 SV=1	7	8	8	8	4	4	7	4	6	8	4	3	6	10	6	0.828571	0.312617	5	5	0	10	123	98
1722	>sp|P70195|PSB7_MOUSE Proteasome subunit beta type-7 OS=Mus musculus OX=10090 GN=Psmb7 PE=1 SV=1	7	8	9	4	6	9	9	5	7	4	5	1	3	3	10	1	1	5	5	0	10	122	277
1723	>sp|Q80UW2|FBX2_MOUSE F-box only protein 2 OS=Mus musculus OX=10090 GN=Fbxo2 PE=1 SV=1	5	7	10	7	4	4	3	5	7	5	10	9	5	7	9	0.727273	0.179842	5	5	0	10	122	297
1724	>sp|Q9JHW2|NIT2_MOUSE Omega-amidase NIT2 OS=Mus musculus OX=10090 GN=Nit2 PE=1 SV=1	5	10	5	7	6	5	5	3	5	5	9	7	5	9	8	0.69697	0.0830108	5	5	0	10	122	276
1725	>sp|P04925|PRIO_MOUSE Major prion protein OS=Mus musculus OX=10090 GN=Prnp PE=1 SV=2	4	6	3	5	5	2	8	7	9	5	10	5	6	5	7	1.34783	0.267207	5	5	0	10	121	254
1726	>sp|P70297|STAM1_MOUSE Signal transducing adapter molecule 1 OS=Mus musculus OX=10090 GN=Stam PE=1 SV=3	4	7	NaN	10	6	6	5	4	8	6	7	7	10	7	NaN	0.859259	0.498425	4	5	0	10	121	548
1727	>sp|Q8BI08|MAL2_MOUSE Protein MAL2 OS=Mus musculus OX=10090 GN=Mal2 PE=1 SV=1	10	4	3	6	2	10	7	9	9	7	6	6	3	8	4	1.68	0.0577908	5	5	0	10	121	175
1728	>sp|P39053-4|DYN1_MOUSE Isoform 4 of Dynamin-1 OS=Mus musculus OX=10090 GN=Dnm1	6	5	5	6	3	5	7	8	7	9	8	7	10	5	3	1.44	0.0337808	5	5	0	10	120	864
1729	>sp|Q3UEB3|PUF60_MOUSE Poly(U)-binding-splicing factor PUF60 OS=Mus musculus OX=10090 GN=Puf60 PE=1 SV=2	6	4	7	9	4	4	6	7	6	6	7	4	5	10	5	0.966667	0.856076	5	5	0	10	120	564
1730	>sp|P18052|PTPRA_MOUSE Receptor-type tyrosine-protein phosphatase alpha OS=Mus musculus OX=10090 GN=Ptpra PE=1 SV=3	3	8	7	6	6	3	NaN	10	9	4	9	8	8	9	4	1.08333	0.790416	5	4	0	10	118	829
1731	>sp|P56376|ACYP1_MOUSE Acylphosphatase-1 OS=Mus musculus OX=10090 GN=Acyp1 PE=1 SV=2	NaN	NaN	5	8	8	6	5	9	9	8	NaN	8	4	7	7	1.05714	0.769809	3	5	0	10	118	99
1732	>sp|Q60865|CAPR1_MOUSE Caprin-1 OS=Mus musculus OX=10090 GN=Caprin1 PE=1 SV=2	6	7	8	7	7	9	4	2	6	7	1	3	10	8	6	0.8	0.294849	5	5	0	10	118	707
1733	>sp|Q9CZT8|RAB3B_MOUSE Ras-related protein Rab-3B OS=Mus musculus OX=10090 GN=Rab3b PE=1 SV=1	4	7	6	5	3	6	9	5	4	3	10	5	5	9	4	1.08	0.756979	5	5	0	10	116	219
1734	>sp|Q9D7N9|APMAP_MOUSE Adipocyte plasma membrane-associated protein OS=Mus musculus OX=10090 GN=Apmap PE=1 SV=1	5	5	4	9	3	6	3	8	5	7	5	4	10	6	7	1.11538	0.664848	5	5	0	10	116	415
1735	>sp|Q920N7|SYT12_MOUSE Synaptotagmin-12 OS=Mus musculus OX=10090 GN=Syt12 PE=1 SV=1	6	10	3	9	3	2	4	5	4	9	5	5	5	7	6	0.774194	0.474459	5	5	0	10	115	421
1736	>sp|Q9Z130|HNRDL_MOUSE Heterogeneous nuclear ribonucleoprotein D-like OS=Mus musculus OX=10090 GN=Hnrnpdl PE=1 SV=1	10	6	8	1	7	10	7	5	6	8	6	1	5	7	5	1.125	0.656468	5	5	0	10	115	301
1737	>sp|P67984|RL22_MOUSE 60S ribosomal protein L22 OS=Mus musculus OX=10090 GN=Rpl22 PE=1 SV=2	9	4	5	6	4	4	6	6	4	5	8	10	4	3	8	0.892857	0.576101	5	5	0	10	114	128
1738	>sp|Q8BHL3|TB10B_MOUSE TBC1 domain family member 10B OS=Mus musculus OX=10090 GN=Tbc1d10b PE=1 SV=2	6	7	10	6	3	5	4	6	3	9	3	5	8	6	7	0.84375	0.52991	5	5	0	10	114	798
1739	>sp|Q8BL97|SRSF7_MOUSE Serine/arginine-rich splicing factor 7 OS=Mus musculus OX=10090 GN=Srsf7 PE=1 SV=1	5	6	8	4	8	7	6	6	4	6	10	4	7	5	8	0.935484	0.681057	5	5	0	10	114	267
1740	>sp|Q9CQ54|NDUC2_MOUSE NADH dehydrogenase [ubiquinone] 1 subunit C2 OS=Mus musculus OX=10090 GN=Ndufc2 PE=1 SV=1	7	6	8	7	5	4	2	6	10	6	4	6	6	6	5	0.848485	0.501645	5	5	0	10	114	120
1741	>sp|P50580|PA2G4_MOUSE Proliferation-associated protein 2G4 OS=Mus musculus OX=10090 GN=Pa2g4 PE=1 SV=3	3	7	5	6	5	4	6	6	10	4	2	7	8	6	4	1.15385	0.549569	5	5	0	10	113	394
1742	>sp|P51660|DHB4_MOUSE Peroxisomal multifunctional enzyme type 2 OS=Mus musculus OX=10090 GN=Hsd17b4 PE=1 SV=3	4	7	6	5	7	5	6	3	7	6	5	2	3	4	6	0.931034	0.666581	5	5	0	10	113	735
1743	>sp|Q4KUS2|UN13A_MOUSE Protein unc-13 homolog A OS=Mus musculus OX=10090 GN=Unc13a PE=1 SV=3	2	9	3	8	4	2	3	5	10	8	4	8	9	5	9	1.07692	0.850118	5	5	0	10	113	1712
1744	>sp|Q60692|PSB6_MOUSE Proteasome subunit beta type-6 OS=Mus musculus OX=10090 GN=Psmb6 PE=1 SV=3	5	6	4	3	6	4	3	7	5	6	9	7	10	4	8	1.04167	0.832723	5	5	0	10	113	238
1745	>sp|Q62376|RU17_MOUSE U1 small nuclear ribonucleoprotein 70 kDa OS=Mus musculus OX=10090 GN=Snrnp70 PE=1 SV=2	10	6	5	8	4	1	6	6	8	5	4	2	9	7	5	0.787879	0.40175	5	5	0	10	113	448
1746	>sp|Q7TMB8|CYFP1_MOUSE Cytoplasmic FMR1-interacting protein 1 OS=Mus musculus OX=10090 GN=Cyfip1 PE=1 SV=1	4	9	4	4	8	1	7	10	8	2	5	3	6	7	8	0.965517	0.925537	5	5	0	10	113	1253
1747	>sp|P27601|GNA13_MOUSE Guanine nucleotide-binding protein subunit alpha-13 OS=Mus musculus OX=10090 GN=Gna13 PE=1 SV=1	10	5	5	9	5	7	4	5	6	4	6	6	5	7	5	0.764706	0.2388	5	5	0	10	112	377
1748	>sp|P08003|PDIA4_MOUSE Protein disulfide-isomerase A4 OS=Mus musculus OX=10090 GN=Pdia4 PE=1 SV=3	4	6	4	7	7	4	3	10	4	7	5	5	8	5	5	1	1	5	5	0	10	111	638
1749	>sp|Q9JLN9|MTOR_MOUSE Serine/threonine-protein kinase mTOR OS=Mus musculus OX=10090 GN=Mtor PE=1 SV=2	8	8	1	5	4	2	7	10	10	3	2	5	9	5	8	1.23077	0.591134	5	5	0	10	111	2549
1750	>sp|Q7TPM6|FSD1_MOUSE Fibronectin type III and SPRY domain-containing protein 1 OS=Mus musculus OX=10090 GN=Fsd1 PE=1 SV=1	6	10	4	4	8	2	4	5	5	7	6	4	6	7	7	0.71875	0.240972	5	5	0	10	109	496
1751	>sp|Q8CHT0|AL4A1_MOUSE Delta-1-pyrroline-5-carboxylate dehydrogenase, mitochondrial OS=Mus musculus OX=10090 GN=Aldh4a1 PE=1 SV=3	6	6	4	3	8	6	7	4	2	6	5	6	6	6	7	0.925926	0.756979	5	5	0	10	109	562
1752	>sp|Q9QWY8|ASAP1_MOUSE Arf-GAP with SH3 domain, ANK repeat and PH domain-containing protein 1 OS=Mus musculus OX=10090 GN=Asap1 PE=1 SV=2	6	10	4	8	9	NaN	NaN	9	7	9	5	4	9	9	NaN	1.12613	0.560817	5	3	0	10	109	1147
1753	>sp|O70252|HMOX2_MOUSE Heme oxygenase 2 OS=Mus musculus OX=10090 GN=Hmox2 PE=1 SV=1	6	6	5	5	4	1	5	6	6	6	6	5	4	5	10	0.923077	0.710342	5	5	0	10	107	315
1754	>sp|O70311|NMT2_MOUSE Glycylpeptide N-tetradecanoyltransferase 2 OS=Mus musculus OX=10090 GN=Nmt2 PE=1 SV=1	4	9	5	5	6	NaN	5	4	10	7	4	5	6	6	7	1.12069	0.658491	5	4	0	10	107	529
1755	>sp|Q8VE47|UBA5_MOUSE Ubiquitin-like modifier-activating enzyme 5 OS=Mus musculus OX=10090 GN=Uba5 PE=1 SV=2	3	4	6	10	8	8	4	5	2	5	4	6	6	5	6	0.774194	0.40882	5	5	0	10	107	403
1756	>sp|Q9CR26|VTA1_MOUSE Vacuolar protein sorting-associated protein VTA1 homolog OS=Mus musculus OX=10090 GN=Vta1 PE=1 SV=1	5	3	4	9	4	4	5	6	4	6	5	5	9	7	3	1	1	5	5	0	10	107	309
1757	>sp|Q9ES28|ARHG7_MOUSE Rho guanine nucleotide exchange factor 7 OS=Mus musculus OX=10090 GN=Arhgef7 PE=1 SV=2	7	9	6	5	NaN	3	7	9	8	NaN	3	4	7	4	10	1	1	4	4	0	10	107	862
1758	>sp|O08810|U5S1_MOUSE 116 kDa U5 small nuclear ribonucleoprotein component OS=Mus musculus OX=10090 GN=Eftud2 PE=1 SV=1	7	9	NaN	6	2	3	7	NaN	8	10	6	7	8	10	5	1.16667	0.647967	4	4	0	10	106	971
1759	>sp|Q91VN4|MIC25_MOUSE MICOS complex subunit Mic25 OS=Mus musculus OX=10090 GN=Chchd6 PE=1 SV=2	5	5	8	8	3	7	4	6	3	3	10	2	7	7	3	0.793103	0.370555	5	5	0	10	105	273
1760	>sp|B1AZP2|DLGP4_MOUSE Disks large-associated protein 4 OS=Mus musculus OX=10090 GN=Dlgap4 PE=1 SV=1	NaN	10	9	NaN	5	NaN	6	NaN	7	8	7	7	9	10	6	0.875	0.573392	3	3	0	10	104	992
1761	>sp|Q62448|IF4G2_MOUSE Eukaryotic translation initiation factor 4 gamma 2 OS=Mus musculus OX=10090 GN=Eif4g2 PE=1 SV=2	3	3	5	5	4	6	4	7	8	3	2	9	6	2	5	1.4	0.158777	5	5	0	10	104	906
1762	>sp|Q8C8N2|SCAI_MOUSE Protein SCAI OS=Mus musculus OX=10090 GN=Scai PE=1 SV=2	3	7	6	1	5	NaN	6	5	9	3	6	8	6	10	8	1.30682	0.438136	5	4	0	10	104	606
1763	>sp|Q9CR57|RL14_MOUSE 60S ribosomal protein L14 OS=Mus musculus OX=10090 GN=Rpl14 PE=1 SV=3	7	6	4	5	5	3	6	5	5	4	7	2	3	5	10	0.851852	0.29949	5	5	0	10	103	217
1764	>sp|Q9Z2I8|SUCB2_MOUSE Succinate--CoA ligase [GDP-forming] subunit beta, mitochondrial OS=Mus musculus OX=10090 GN=Suclg2 PE=1 SV=3	6	2	5	2	3	4	2	10	5	3	6	5	4	5	10	1.33333	0.478038	5	5	0	10	103	433
1765	>sp|Q8VED9|LEGL_MOUSE Galectin-related protein OS=Mus musculus OX=10090 GN=Lgalsl PE=1 SV=1	3	9	1	2	4	6	3	7	9	4	4	2	10	8	3	1.52632	0.28742	5	5	0	10	102	172
1766	>sp|P62754|RS6_MOUSE 40S ribosomal protein S6 OS=Mus musculus OX=10090 GN=Rps6 PE=1 SV=1	3	1	8	6	6	8	6	2	8	3	4	4	10	5	6	1.125	0.742048	5	5	0	10	101	249
1767	>sp|P26043|RADI_MOUSE Radixin OS=Mus musculus OX=10090 GN=Rdx PE=1 SV=3	6	2	6	5	5	2	10	6	6	5	2	5	NaN	6	6	1.20833	0.517328	5	5	0	10	100	583
1768	>sp|Q91YP2|NEUL_MOUSE Neurolysin, mitochondrial OS=Mus musculus OX=10090 GN=Nln PE=1 SV=1	3	4	7	4	7	2	8	3	5	7	4	10	4	5	4	1	1	5	5	0	10	99	704
1769	>tr|A3QM89|A3QM89_MOUSE Reticulon (Fragment) OS=Mus musculus OX=10090 GN=Rtn1 PE=1 SV=1	7	NaN	NaN	NaN	NaN	6	8	5	6	9	10	7	10	NaN	8	0.971429	#DIV/0!	1	5	0	10	99	253
1770	>sp|Q8R3P0|ACY2_MOUSE Aspartoacylase OS=Mus musculus OX=10090 GN=Aspa PE=1 SV=2	8	4	5	7	4	4	5	7	7	10	4	2	5	5	3	1.17857	0.46765	5	5	0	10	98	312
1771	>sp|O08989|RASM_MOUSE Ras-related protein M-Ras OS=Mus musculus OX=10090 GN=Mras PE=1 SV=1	7	3	6	6	1	5	7	4	10	5	4	2	7	4	4	1.34783	0.331909	5	5	0	10	93	208
1772	>sp|Q8C3Q5-2|SHSA7_MOUSE Isoform 2 of Protein shisa-7 OS=Mus musculus OX=10090 GN=Shisa7	8	6	7	5	10	4	7	NaN	5	NaN	4	NaN	NaN	9	9	0.740741	0.205683	5	3	0	10	93	541
1773	>sp|P28650|PURA1_MOUSE Adenylosuccinate synthetase isozyme 1 OS=Mus musculus OX=10090 GN=Adss1 PE=1 SV=2	4	6	10	4	7	2	6	5	3	6	5	4	NaN	3	5	0.709677	0.227898	5	5	0	10	92	457
1774	>sp|P84104|SRSF3_MOUSE Serine/arginine-rich splicing factor 3 OS=Mus musculus OX=10090 GN=Srsf3 PE=1 SV=1	5	4	4	1	5	6	7	8	5	3	2	7	4	1	4	1.52632	0.115077	5	5	0	10	92	164
1775	>sp|Q99020|ROAA_MOUSE Heterogeneous nuclear ribonucleoprotein A/B OS=Mus musculus OX=10090 GN=Hnrnpab PE=1 SV=1	NaN	10	7	NaN	7	NaN	NaN	8	NaN	7	9	7	NaN	7	NaN	0.9375	0.734546	3	2	0	10	92	285
1776	>sp|P70206|PLXA1_MOUSE Plexin-A1 OS=Mus musculus OX=10090 GN=Plxna1 PE=1 SV=1	3	5	2	10	5	7	9	3	7	3	4	2	3	5	2	1.16	0.673152	5	5	0	10	91	1894
1777	>sp|Q6X893|CTL1_MOUSE Choline transporter-like protein 1 OS=Mus musculus OX=10090 GN=Slc44a1 PE=1 SV=3	4	4	8	NaN	NaN	7	4	5	10	NaN	4	7	4	NaN	2	1.21875	0.570371	3	4	0	10	91	653
1778	>tr|F8VQK3|F8VQK3_MOUSE Guanylate cyclase 1, soluble, alpha 2 OS=Mus musculus OX=10090 GN=Gucy1a2 PE=1 SV=1	1	5	6	6	3	NaN	4	3	10	4	4	5	7	8	5	1.25	0.574803	5	4	0	10	91	730
1779	>sp|Q80TQ2|CYLD_MOUSE Ubiquitin carboxyl-terminal hydrolase CYLD OS=Mus musculus OX=10090 GN=Cyld PE=1 SV=2	4	8	3	NaN	5	NaN	NaN	4	5	6	5	6	7	10	NaN	1	1	4	3	0	10	90	952
1780	>sp|Q5SVL6|RPGP2_MOUSE Rap1 GTPase-activating protein 2 OS=Mus musculus OX=10090 GN=Rap1gap2 PE=1 SV=1	5	2	5	3	8	4	3	5	4	4	5	3	6	4	10	0.869565	0.592708	5	5	0	10	89	712
1781	>sp|Q91W89|MA2C1_MOUSE Alpha-mannosidase 2C1 OS=Mus musculus OX=10090 GN=Man2c1 PE=1 SV=1	5	3	3	2	4	1	10	4	6	4	4	4	6	6	5	1.47059	0.337525	5	5	0	10	89	1039
1782	>sp|Q9JIG8|PRAF2_MOUSE PRA1 family protein 2 OS=Mus musculus OX=10090 GN=Praf2 PE=1 SV=1	10	4	3	3	5	5	1	5	3	5	6	4	7	4	4	0.76	0.455366	5	5	0	10	89	178
1783	>sp|Q99PL5|RRBP1_MOUSE Ribosome-binding protein 1 OS=Mus musculus OX=10090 GN=Rrbp1 PE=1 SV=2	4	5	10	4	6	1	2	4	9	4	3	4	5	5	7	0.689655	0.339458	5	5	0	10	88	1605
1784	>sp|P39447|ZO1_MOUSE Tight junction protein ZO-1 OS=Mus musculus OX=10090 GN=Tjp1 PE=1 SV=2	8	7	3	10	NaN	4	3	2	2	5	4	NaN	5	10	5	0.457143	0.034564	4	5	0	10	87	1745
1785	>sp|Q6W8Q3|PC4L1_MOUSE Purkinje cell protein 4-like protein 1 OS=Mus musculus OX=10090 GN=Pcp4l1 PE=1 SV=1	3	5	7	2	4	3	4	3	NaN	4	2	1	4	6	4	0.833333	0.509717	5	4	0	10	86	68
1786	>sp|P61750|ARF4_MOUSE ADP-ribosylation factor 4 OS=Mus musculus OX=10090 GN=Arf4 PE=1 SV=2	4	3	NaN	7	1	NaN	6	3	5	10	NaN	2	3	5	8	1.6	0.288186	4	4	0	10	85	180
1787	>sp|Q4VAE3|TMM65_MOUSE Transmembrane protein 65 OS=Mus musculus OX=10090 GN=Tmem65 PE=1 SV=1	2	4	5	6	5	6	4	2	10	5	3	3	3	6	7	1.22727	0.521025	5	5	0	10	84	234
1788	>sp|Q8BVI5|STX16_MOUSE Syntaxin-16 OS=Mus musculus OX=10090 GN=Stx16 PE=1 SV=3	5	NaN	3	6	4	2	4	4	7	NaN	2	10	4	5	6	0.944444	0.843934	4	4	0	10	83	326
1789	>tr|Q6NZD2|Q6NZD2_MOUSE Sorting nexin 1 OS=Mus musculus OX=10090 GN=Snx1 PE=1 SV=1	NaN	NaN	9	10	8	NaN	2	9	8	NaN	6	6	NaN	NaN	NaN	0.703704	0.303548	3	3	0	10	83	521
1790	>sp|Q9JIF0-2|ANM1_MOUSE Isoform 2 of Protein arginine N-methyltransferase 1 OS=Mus musculus OX=10090 GN=Prmt1	2	7	4	2	5	NaN	4	6	5	NaN	5	3	5	3	10	1.25	0.481618	5	3	0	10	82	353
1791	>sp|Q8CIQ7|DOCK3_MOUSE Dedicator of cytokinesis protein 3 OS=Mus musculus OX=10090 GN=Dock3 PE=1 SV=1	1	10	7	8	3	NaN	2	4	NaN	5	3	NaN	6	2	5	0.632184	0.389265	5	3	0	10	80	2027
1792	>sp|Q8R317-2|UBQL1_MOUSE Isoform 2 of Ubiquilin-1 OS=Mus musculus OX=10090 GN=Ubqln1	NaN	5	7	4	5	6	1	NaN	8	1	10	1	6	7	NaN	0.761905	0.532399	4	4	0	10	79	554
1793	>sp|Q9R0A0|PEX14_MOUSE Peroxisomal membrane protein PEX14 OS=Mus musculus OX=10090 GN=Pex14 PE=1 SV=1	6	5	2	5	10	NaN	3	NaN	4	7	4	NaN	5	5	5	0.833333	0.645668	5	3	0	10	79	376
1794	>sp|O88456|CPNS1_MOUSE Calpain small subunit 1 OS=Mus musculus OX=10090 GN=Capns1 PE=1 SV=1	7	NaN	NaN	5	6	8	10	NaN	9	6	6	NaN	5	NaN	NaN	1.375	0.10076	3	4	0	10	77	269
1795	>sp|Q9Z1J3|NFS1_MOUSE Cysteine desulfurase, mitochondrial OS=Mus musculus OX=10090 GN=Nfs1 PE=1 SV=3	5	10	7	6	2	2	1	8	3	3	3	1	2	4	4	0.566667	0.181718	5	5	0	10	77	459
1796	>tr|E9QAC6|E9QAC6_MOUSE Galectin OS=Mus musculus OX=10090 GN=Gm49486 PE=1 SV=1	5	2	4	7	4	2	5	1	1	5	6	6	3	NaN	6	0.636364	0.227724	5	5	0	10	75	530
1797	>sp|Q9D8B4|NDUAB_MOUSE NADH dehydrogenase [ubiquinone] 1 alpha subcomplex subunit 11 OS=Mus musculus OX=10090 GN=Ndufa11 PE=1 SV=2	NaN	NaN	NaN	9	NaN	NaN	NaN	9	NaN	NaN	NaN	6	7	9	7	1	#DIV/0!	1	1	0	10	74	141
1798	>tr|Q6XE40|Q6XE40_MOUSE MAGUK p55 subfamily member 3 OS=Mus musculus OX=10090 GN=Mpp3 PE=1 SV=1	NaN	7	6	7	9	NaN	8	8	NaN	7	5	7	NaN	NaN	NaN	1.05747	0.622576	4	3	0	10	74	585
1799	>sp|Q5SUR0|PUR4_MOUSE Phosphoribosylformylglycinamidine synthase OS=Mus musculus OX=10090 GN=Pfas PE=1 SV=1	4	10	3	2	5	NaN	2	2	3	8	2	NaN	3	5	7	0.78125	0.619438	5	4	0	10	73	1337
1800	>tr|E9Q616|E9Q616_MOUSE AHNAK nucleoprotein (desmoyokin) OS=Mus musculus OX=10090 GN=Ahnak PE=1 SV=1	6	7	6	4	7	4	NaN	NaN	10	3	NaN	2	NaN	3	NaN	0.944444	0.855658	5	3	0	10	73	5656
1801	>sp|Q80U49|C170B_MOUSE Centrosomal protein of 170 kDa protein B OS=Mus musculus OX=10090 GN=Cep170b PE=1 SV=2	5	2	5	3	2	4	3	5	4	NaN	NaN	4	4	10	1	1.17647	0.502354	5	4	0	10	68	1574
1802	>sp|F6ZDS4|TPR_MOUSE Nucleoprotein TPR OS=Mus musculus OX=10090 GN=Tpr PE=1 SV=1	NaN	NaN	NaN	NaN	6	NaN	9	4	6	8	NaN	3	6	10	NaN	1.125	#DIV/0!	1	4	0	10	64	2431
1803	>sp|P83510|TNIK_MOUSE Traf2 and NCK-interacting protein kinase OS=Mus musculus OX=10090 GN=Tnik PE=1 SV=2	10	NaN	8	3	NaN	NaN	3	9	NaN	NaN	9	1	NaN	6	3	0.857143	0.793463	3	2	0	10	63	1323
1804	>tr|A0A0R4J2C2|A0A0R4J2C2_MOUSE Synaptotagmin-2 OS=Mus musculus OX=10090 GN=Syt2 PE=1 SV=1	5	10	9	6	NaN	5	NaN	5	NaN	NaN	4	NaN	9	NaN	NaN	0.666667	0.234023	4	2	0	10	63	422
1805	>tr|Q91VK2|Q91VK2_MOUSE Eef1d protein OS=Mus musculus OX=10090 GN=Eef1d PE=1 SV=1	5	NaN	5	NaN	NaN	NaN	NaN	10	NaN	9	9	NaN	7	9	NaN	1.9	0.0121217	2	2	0	10	62	276
1806	>sp|P35980|RL18_MOUSE 60S ribosomal protein L18 OS=Mus musculus OX=10090 GN=Rpl18 PE=1 SV=3	4	4	3	5	5	10	4	1	5	4	4	NaN	NaN	3	3	1.14286	0.701493	5	5	0	10	58	188
1807	>sp|P00397|COX1_MOUSE Cytochrome c oxidase subunit 1 OS=Mus musculus OX=10090 GN=Mtco1 PE=1 SV=2	3	4	NaN	NaN	4	NaN	7	2	10	NaN	4	3	3	1	3	1.72727	0.321132	3	3	0	10	57	514
1808	>sp|Q6DFV3|RHG21_MOUSE Rho GTPase-activating protein 21 OS=Mus musculus OX=10090 GN=Arhgap21 PE=1 SV=1	1	9	3	2	3	NaN	NaN	6	4	NaN	NaN	NaN	3	2	10	1.38889	0.585241	5	2	0	10	57	1944
1809	>sp|Q8C129|LCAP_MOUSE Leucyl-cystinyl aminopeptidase OS=Mus musculus OX=10090 GN=Lnpep PE=1 SV=1	4	6	3	NaN	10	NaN	1	6	1	NaN	NaN	NaN	4	NaN	3	0.463768	0.238069	4	3	0	10	54	1025
1810	>tr|M0QWP1|M0QWP1_MOUSE Agrin OS=Mus musculus OX=10090 GN=Agrn PE=1 SV=1	2	5	10	4	4	NaN	NaN	4	NaN	3	NaN	5	NaN	4	4	0.7	0.536338	5	2	0	10	52	2034
1811	>tr|A0A1D5RLG3|A0A1D5RLG3_MOUSE Rab3 GTPase-activating protein catalytic subunit OS=Mus musculus OX=10090 GN=Rab3gap1 PE=1 SV=1	NaN	8	10	7	NaN	NaN	NaN	NaN	NaN	NaN	3	NaN	7	NaN	NaN	#DIV/0!	#DIV/0!	3	0	0	10	51	988
1812	>sp|Q9QZQ1|AFAD_MOUSE Afadin OS=Mus musculus OX=10090 GN=Afdn PE=1 SV=3	3	6	NaN	2	6	3	NaN	3	3	3	3	NaN	10	NaN	NaN	0.705882	0.270829	4	4	0	10	50	1820
1813	>tr|A0A0R4J1E2|A0A0R4J1E2_MOUSE Elongation factor 1-delta OS=Mus musculus OX=10090 GN=Eef1d PE=1 SV=1	NaN	NaN	3	NaN	NaN	NaN	5	NaN	7	1	NaN	8	1	1	6	1.44444	#DIV/0!	1	3	0	10	49	660
1814	>tr|E9Q7C9|E9Q7C9_MOUSE Kinesin light chain OS=Mus musculus OX=10090 GN=Klc1 PE=1 SV=1	NaN	NaN	5	9	NaN	2	7	6	NaN	NaN	NaN	NaN	NaN	NaN	10	0.714286	0.477703	2	3	0	10	49	560
1815	>sp|B1AZP2-2|DLGP4_MOUSE Isoform 2 of Disks large-associated protein 4 OS=Mus musculus OX=10090 GN=Dlgap4	6	NaN	NaN	10	NaN	5	NaN	7	NaN	NaN	NaN	NaN	NaN	NaN	NaN	0.75	0.465478	2	2	0	10	41	989
1816	>tr|A2BFF5|A2BFF5_MOUSE Cytoplasmic dynein 1 intermediate chain 2 OS=Mus musculus OX=10090 GN=Dync1i2 PE=1 SV=1	NaN	10	NaN	NaN	9	NaN	6	NaN	NaN	5	NaN	8	NaN	NaN	3	0.578947	0.0298575	2	2	0	10	41	637
1817	>sp|Q8BLE7|VGLU2_MOUSE Vesicular glutamate transporter 2 OS=Mus musculus OX=10090 GN=Slc17a6 PE=1 SV=1	5	NaN	NaN	NaN	NaN	6	NaN	10	NaN	NaN	NaN	6	NaN	NaN	NaN	1.6	#DIV/0!	1	2	0	10	39	582
1818	>tr|D3Z7X7|D3Z7X7_MOUSE Tumor protein D52 (Fragment) OS=Mus musculus OX=10090 GN=Tpd52 PE=1 SV=1	NaN	NaN	NaN	NaN	8	NaN	10	7	NaN	NaN	NaN	9	NaN	NaN	NaN	1.0625	#DIV/0!	1	2	0	10	34	206
1819	>tr|E9QNF7|E9QNF7_MOUSE Contactin-associated protein-like 2 OS=Mus musculus OX=10090 GN=Cntnap2 PE=1 SV=1	NaN	NaN	6	NaN	NaN	NaN	NaN	NaN	NaN	10	NaN	10	8	NaN	NaN	1.66667	#DIV/0!	1	1	0	10	34	1332
1820	>sp|P23818|GRIA1_MOUSE Glutamate receptor 1 OS=Mus musculus OX=10090 GN=Gria1 PE=1 SV=1	NaN	NaN	NaN	NaN	NaN	NaN	NaN	NaN	NaN	NaN	NaN	NaN	5	NaN	5	#DIV/0!	#DIV/0!	0	0	0	10	30	907
1821	>sp|Q6PHU5-2|SORT_MOUSE Isoform 2 of Sortilin OS=Mus musculus OX=10090 GN=Sort1	NaN	3	NaN	NaN	NaN	NaN	NaN	NaN	10	4	NaN	NaN	NaN	NaN	NaN	2.33333	#DIV/0!	1	2	0	10	24	858
1822	>sp|Q8BY87|UBP47_MOUSE Ubiquitin carboxyl-terminal hydrolase 47 OS=Mus musculus OX=10090 GN=Usp47 PE=1 SV=2	10	NaN	NaN	NaN	NaN	NaN	NaN	4	NaN	NaN	NaN	NaN	NaN	10	NaN	0.4	#DIV/0!	1	1	0	10	24	1376
1823	>tr|F6RPJ9|F6RPJ9_MOUSE Insulin-degrading enzyme (Fragment) OS=Mus musculus OX=10090 GN=Ide PE=1 SV=1	NaN	NaN	NaN	NaN	3	NaN	NaN	3	NaN	NaN	NaN	NaN	NaN	NaN	10	1	#DIV/0!	1	1	0	10	23	987
1824	>tr|A0A2C9F2D2|A0A2C9F2D2_MOUSE Annexin OS=Mus musculus OX=10090 GN=Anxa7 PE=1 SV=1	NaN	NaN	NaN	NaN	NaN	NaN	10	NaN	NaN	NaN	NaN	5	NaN	NaN	NaN	#DIV/0!	#DIV/0!	0	1	0	10	22	485
1825	>sp|Q6PCP5-2|MFF_MOUSE Isoform 2 of Mitochondrial fission factor OS=Mus musculus OX=10090 GN=Mff	NaN	NaN	NaN	NaN	5	10	NaN	NaN	NaN	NaN	NaN	4	NaN	NaN	NaN	2	#DIV/0!	1	1	0	10	20	239
1826	>sp|P21619-2|LMNB2_MOUSE Isoform B3 of Lamin-B2 OS=Mus musculus OX=10090 GN=Lmnb2	NaN	NaN	NaN	NaN	NaN	6	NaN	NaN	NaN	NaN	NaN	3	NaN	NaN	NaN	#DIV/0!	#DIV/0!	0	1	0	10	19	474
1827	>sp|Q8C078-2|KKCC2_MOUSE Isoform 2 of Calcium/calmodulin-dependent protein kinase kinase 2 OS=Mus musculus OX=10090 GN=Camkk2	NaN	NaN	10	NaN	NaN	NaN	NaN	NaN	8	NaN	NaN	NaN	NaN	NaN	NaN	0.8	#DIV/0!	1	1	0	10	18	541
1828	>tr|F6ZFU0|F6ZFU0_MOUSE Elongation factor 1-delta (Fragment) OS=Mus musculus OX=10090 GN=Eef1d PE=1 SV=1	NaN	NaN	NaN	NaN	10	NaN	NaN	NaN	NaN	NaN	NaN	NaN	NaN	NaN	NaN	#DIV/0!	#DIV/0!	1	0	0	10	18	552
1829	>sp|P97798-4|NEO1_MOUSE Isoform 4 of Neogenin OS=Mus musculus OX=10090 GN=Neo1	NaN	NaN	NaN	NaN	NaN	NaN	NaN	NaN	NaN	NaN	NaN	NaN	NaN	NaN	NaN	#DIV/0!	#DIV/0!	0	0	0	10	17	1482
1830	>sp|Q61701-9|ELAV4_MOUSE Isoform 8 of ELAV-like protein 4 OS=Mus musculus OX=10090 GN=Elavl4	NaN	NaN	NaN	NaN	NaN	NaN	NaN	NaN	NaN	NaN	NaN	NaN	7	NaN	NaN	#DIV/0!	#DIV/0!	0	0	0	10	17	383
1831	>sp|Q6R0H7-4|GNAS1_MOUSE Isoform XLas-4 of Guanine nucleotide-binding protein G(s) subunit alpha isoforms XLas OS=Mus musculus OX=10090 GN=Gnas	NaN	NaN	NaN	NaN	NaN	NaN	NaN	NaN	NaN	7	NaN	NaN	NaN	NaN	NaN	#DIV/0!	#DIV/0!	0	1	0	10	17	1119
1832	>tr|A2RTH5|A2RTH5_MOUSE Leucine carboxyl methyltransferase 1 OS=Mus musculus OX=10090 GN=Lcmt1 PE=1 SV=1	NaN	NaN	NaN	NaN	10	NaN	NaN	NaN	NaN	NaN	NaN	NaN	NaN	7	NaN	#DIV/0!	#DIV/0!	1	0	0	10	17	332
1833	>sp|Q6ZPQ6-2|PITM2_MOUSE Isoform 2 of Membrane-associated phosphatidylinositol transfer protein 2 OS=Mus musculus OX=10090 GN=Pitpnm2	NaN	NaN	NaN	NaN	NaN	NaN	NaN	NaN	NaN	NaN	NaN	NaN	NaN	NaN	NaN	#DIV/0!	#DIV/0!	0	0	0	10	15	1281
1834	>tr|Q3UGN9|Q3UGN9_MOUSE Signal transducing adapter molecule 1 OS=Mus musculus OX=10090 GN=Stam PE=1 SV=1	NaN	NaN	10	NaN	NaN	NaN	NaN	NaN	NaN	NaN	NaN	NaN	NaN	NaN	5	#DIV/0!	#DIV/0!	1	0	0	10	15	462
1835	>tr|Q6AXD2|Q6AXD2_MOUSE Abi2 protein OS=Mus musculus OX=10090 GN=Abi2 PE=1 SV=1	NaN	NaN	NaN	NaN	NaN	NaN	NaN	NaN	4	NaN	NaN	NaN	NaN	10	NaN	#DIV/0!	#DIV/0!	0	1	0	10	14	487
1836	>sp|A1L3T7|RIPR3_MOUSE RIPOR family member 3 OS=Mus musculus OX=10090 GN=Ripor3 PE=1 SV=1	NaN	NaN	NaN	NaN	NaN	NaN	NaN	NaN	10	NaN	NaN	NaN	NaN	NaN	NaN	#DIV/0!	#DIV/0!	0	1	0	10	10	938
1837	>sp|P70336-2|ROCK2_MOUSE Isoform 2 of Rho-associated protein kinase 2 OS=Mus musculus OX=10090 GN=Rock2	NaN	NaN	NaN	NaN	NaN	10	NaN	NaN	NaN	NaN	NaN	NaN	NaN	NaN	NaN	#DIV/0!	#DIV/0!	0	1	0	10	10	1444
1838	>sp|P97798-3|NEO1_MOUSE Isoform 3 of Neogenin OS=Mus musculus OX=10090 GN=Neo1	NaN	NaN	10	NaN	NaN	NaN	NaN	NaN	NaN	NaN	NaN	NaN	NaN	NaN	NaN	#DIV/0!	#DIV/0!	1	0	0	10	10	1477
1839	>sp|Q8CGY8|OGT1_MOUSE UDP-N-acetylglucosamine--peptide N-acetylglucosaminyltransferase 110 kDa subunit OS=Mus musculus OX=10090 GN=Ogt PE=1 SV=2	NaN	NaN	NaN	NaN	NaN	10	NaN	NaN	NaN	NaN	NaN	NaN	NaN	NaN	NaN	#DIV/0!	#DIV/0!	0	1	0	10	10	1046
1840	>sp|Q8R326-2|PSPC1_MOUSE Isoform 2 of Paraspeckle component 1 OS=Mus musculus OX=10090 GN=Pspc1	NaN	NaN	NaN	NaN	NaN	NaN	NaN	NaN	NaN	10	NaN	NaN	NaN	NaN	NaN	#DIV/0!	#DIV/0!	0	1	0	10	10	466
1841	>sp|Q99KY4-2|GAK_MOUSE Isoform 2 of Cyclin-G-associated kinase OS=Mus musculus OX=10090 GN=Gak	NaN	NaN	NaN	NaN	NaN	NaN	NaN	NaN	NaN	NaN	NaN	NaN	NaN	NaN	NaN	#DIV/0!	#DIV/0!	0	0	0	10	10	1256
1842	>sp|Q9R1V7-3|ADA23_MOUSE Isoform Gamma of Disintegrin and metalloproteinase domain-containing protein 23 OS=Mus musculus OX=10090 GN=Adam23	NaN	NaN	NaN	NaN	NaN	NaN	NaN	NaN	NaN	NaN	NaN	NaN	NaN	NaN	10	#DIV/0!	#DIV/0!	0	0	0	10	10	829
1843	>tr|A0A1D5RMC1|A0A1D5RMC1_MOUSE Dynein light intermediate chain (Fragment) OS=Mus musculus OX=10090 GN=Dync1li2 PE=1 SV=1	NaN	NaN	NaN	NaN	NaN	NaN	10	NaN	NaN	NaN	NaN	NaN	NaN	NaN	NaN	#DIV/0!	#DIV/0!	0	1	0	10	10	406
1844	>tr|A2AEW8|A2AEW8_MOUSE GRIP1-associated protein 1 OS=Mus musculus OX=10090 GN=Gripap1 PE=1 SV=1	10	NaN	NaN	NaN	NaN	NaN	NaN	NaN	NaN	NaN	NaN	NaN	NaN	NaN	NaN	#DIV/0!	#DIV/0!	1	0	0	10	10	837
1845	>tr|A2AMQ5|A2AMQ5_MOUSE Phosphatidate cytidylyltransferase OS=Mus musculus OX=10090 GN=Cds2 PE=1 SV=1	NaN	NaN	NaN	NaN	NaN	NaN	NaN	NaN	NaN	NaN	NaN	NaN	NaN	NaN	NaN	#DIV/0!	#DIV/0!	0	0	0	10	10	427
1846	>tr|D3Z4S7|D3Z4S7_MOUSE Adhesion G protein-coupled receptor L3 OS=Mus musculus OX=10090 GN=Adgrl3 PE=1 SV=1	NaN	NaN	NaN	NaN	NaN	NaN	NaN	NaN	NaN	NaN	NaN	NaN	NaN	10	NaN	#DIV/0!	#DIV/0!	0	0	0	10	10	1571
1847	>tr|E9QK41|E9QK41_MOUSE Actin-binding LIM protein 1 OS=Mus musculus OX=10090 GN=Ablim1 PE=1 SV=1	NaN	NaN	10	NaN	NaN	NaN	NaN	NaN	NaN	NaN	NaN	NaN	NaN	NaN	NaN	#DIV/0!	#DIV/0!	1	0	0	10	10	861
1848	>tr|G3X9J4|G3X9J4_MOUSE RAB11-binding protein RELCH OS=Mus musculus OX=10090 GN=Relch PE=1 SV=2	NaN	NaN	NaN	NaN	NaN	NaN	NaN	NaN	NaN	NaN	NaN	10	NaN	NaN	NaN	#DIV/0!	#DIV/0!	0	0	0	10	10	1216
1849	>tr|H3BKL5|H3BKL5_MOUSE 3-ketoacyl-CoA thiolase A, peroxisomal OS=Mus musculus OX=10090 GN=Acaa1a PE=1 SV=1	NaN	NaN	NaN	NaN	NaN	NaN	NaN	NaN	NaN	NaN	NaN	NaN	NaN	NaN	NaN	#DIV/0!	#DIV/0!	0	0	0	10	10	373
1850	>tr|Q3UF95|Q3UF95_MOUSE Large proline-rich protein BAG6 OS=Mus musculus OX=10090 GN=Bag6 PE=1 SV=1	NaN	10	NaN	NaN	NaN	NaN	NaN	NaN	NaN	NaN	NaN	NaN	NaN	NaN	NaN	#DIV/0!	#DIV/0!	1	0	0	10	10	1136
1851	>sp|P42125|ECI1_MOUSE Enoyl-CoA delta isomerase 1, mitochondrial OS=Mus musculus OX=10090 GN=Eci1 PE=1 SV=2	7	4	9	7	4	9	7	8	9	5	6	9	8	7	6	1.22581	0.286051	5	5	0	9	136	289
1852	>tr|Q91V77|Q91V77_MOUSE Protein S100 OS=Mus musculus OX=10090 GN=S100a1 PE=1 SV=1	4	5	4	7	6	7	9	7	8	7	8	9	4	4	9	1.46154	0.00944233	5	5	0	9	130	94
1853	>sp|Q8BJY1|PSMD5_MOUSE 26S proteasome non-ATPase regulatory subunit 5 OS=Mus musculus OX=10090 GN=Psmd5 PE=1 SV=4	8	9	5	4	8	8	4	7	5	6	7	7	5	9	6	0.882353	0.523742	5	5	0	9	125	504
1854	>sp|Q2NL51|GSK3A_MOUSE Glycogen synthase kinase-3 alpha OS=Mus musculus OX=10090 GN=Gsk3a PE=1 SV=2	7	4	7	9	6	4	6	8	6	5	4	6	8	6	5	0.878788	0.467493	5	5	0	9	124	490
1855	>sp|P41216|ACSL1_MOUSE Long-chain-fatty-acid--CoA ligase 1 OS=Mus musculus OX=10090 GN=Acsl1 PE=1 SV=2	6	8	6	6	7	5	9	4	8	3	5	8	3	8	9	0.878788	0.531949	5	5	0	9	122	699
1856	>sp|P85094|ISC2A_MOUSE Isochorismatase domain-containing protein 2A OS=Mus musculus OX=10090 GN=Isoc2a PE=1 SV=1	6	7	4	5	7	4	8	5	9	5	6	7	7	6	7	1.06897	0.73281	5	5	0	9	122	206
1857	>sp|Q501J6|DDX17_MOUSE Probable ATP-dependent RNA helicase DDX17 OS=Mus musculus OX=10090 GN=Ddx17 PE=1 SV=1	9	9	6	7	5	7	7	4	2	6	5	7	6	6	7	0.722222	0.150248	5	5	0	9	122	650
1858	>sp|O55100|SNG1_MOUSE Synaptogyrin-1 OS=Mus musculus OX=10090 GN=Syngr1 PE=1 SV=2	9	6	5	4	4	8	4	5	7	9	9	3	5	7	9	1.17857	0.46765	5	5	0	9	121	234
1859	>sp|P50114|S100B_MOUSE Protein S100-B OS=Mus musculus OX=10090 GN=S100b PE=1 SV=2	6	6	4	7	6	5	5	5	8	9	4	6	8	3	5	1.10345	0.56511	5	5	0	9	121	92
1860	>sp|Q99JI4|PSMD6_MOUSE 26S proteasome non-ATPase regulatory subunit 6 OS=Mus musculus OX=10090 GN=Psmd6 PE=1 SV=1	2	8	3	9	5	3	6	2	9	5	6	4	4	8	7	0.925926	0.832723	5	5	0	9	121	389
1861	>sp|Q8QZY1|EIF3L_MOUSE Eukaryotic translation initiation factor 3 subunit L OS=Mus musculus OX=10090 GN=Eif3l PE=1 SV=1	4	8	9	7	6	1	6	8	7	8	7	3	6	8	7	0.882353	0.622383	5	5	0	9	120	564
1862	>sp|Q9CQH7|BT3L4_MOUSE Transcription factor BTF3 homolog 4 OS=Mus musculus OX=10090 GN=Btf3l4 PE=1 SV=1	2	7	8	5	8	5	3	6	7	4	9	5	5	5	8	0.833333	0.477381	5	5	0	9	120	158
1863	>sp|P84096|RHOG_MOUSE Rho-related GTP-binding protein RhoG OS=Mus musculus OX=10090 GN=Rhog PE=1 SV=1	5	7	9	9	4	5	4	7	5	8	6	6	8	6	6	0.852941	0.449248	5	5	0	9	119	191
1864	>sp|Q06138|CAB39_MOUSE Calcium-binding protein 39 OS=Mus musculus OX=10090 GN=Cab39 PE=1 SV=2	6	8	4	6	6	4	4	7	9	4	5	4	2	8	8	0.933333	0.749117	5	5	0	9	119	341
1865	>sp|Q5EBJ4|ERMIN_MOUSE Ermin OS=Mus musculus OX=10090 GN=Ermn PE=1 SV=1	8	7	7	7	4	6	6	9	6	9	7	4	6	9	3	1.09091	0.56511	5	5	0	9	119	281
1866	>sp|P24472|GSTA4_MOUSE Glutathione S-transferase A4 OS=Mus musculus OX=10090 GN=Gsta4 PE=1 SV=3	8	4	2	9	3	6	7	4	7	6	4	6	4	9	9	1.15385	0.607511	5	5	0	9	118	222
1867	>sp|Q99M87|DNJA3_MOUSE DnaJ homolog subfamily A member 3, mitochondrial OS=Mus musculus OX=10090 GN=Dnaja3 PE=1 SV=1	5	5	5	8	7	5	9	5	3	6	6	4	8	6	3	0.933333	0.740439	5	5	0	9	117	480
1868	>sp|P45878|FKBP2_MOUSE Peptidyl-prolyl cis-trans isomerase FKBP2 OS=Mus musculus OX=10090 GN=Fkbp2 PE=1 SV=1	4	5	8	6	7	5	6	4	8	5	6	4	4	6	8	0.933333	0.6938	5	5	0	9	116	140
1869	>sp|Q5U458|DJC11_MOUSE DnaJ homolog subfamily C member 11 OS=Mus musculus OX=10090 GN=Dnajc11 PE=1 SV=2	6	5	5	9	4	NaN	4	4	7	4	8	6	4	5	7	0.818966	0.401969	5	4	0	9	116	559
1870	>sp|Q80TL0|PPM1E_MOUSE Protein phosphatase 1E OS=Mus musculus OX=10090 GN=Ppm1e PE=1 SV=2	4	8	6	5	7	5	8	5	9	6	3	2	5	7	6	1.1	0.592708	5	5	0	9	116	749
1871	>sp|Q8CGA0|PPM1F_MOUSE Protein phosphatase 1F OS=Mus musculus OX=10090 GN=Ppm1f PE=1 SV=1	2	6	9	9	7	4	2	8	5	8	8	6	7	4	3	0.818182	0.5094	5	5	0	9	115	452
1872	>sp|Q80U63|MFN2_MOUSE Mitofusin-2 OS=Mus musculus OX=10090 GN=Mfn2 PE=1 SV=3	5	8	6	4	7	2	4	5	5	4	4	5	7	8	9	0.666667	0.0557665	5	5	0	9	113	757
1873	>sp|Q8BNY6|NCS1_MOUSE Neuronal calcium sensor 1 OS=Mus musculus OX=10090 GN=Ncs1 PE=1 SV=3	6	6	6	8	2	6	5	7	5	5	9	5	7	8	5	1	1	5	5	0	9	112	190
1874	>sp|Q91VE0|S27A4_MOUSE Long-chain fatty acid transport protein 4 OS=Mus musculus OX=10090 GN=Slc27a4 PE=1 SV=1	8	4	7	4	5	5	7	6	8	5	6	5	5	9	6	1.10714	0.56511	5	5	0	9	112	643
1875	>sp|Q9CQ91|NDUA3_MOUSE NADH dehydrogenase [ubiquinone] 1 alpha subcomplex subunit 3 OS=Mus musculus OX=10090 GN=Ndufa3 PE=1 SV=1	4	4	5	7	5	3	6	8	2	9	6	4	5	8	3	1.12	0.6938	5	5	0	9	112	84
1876	>sp|P62331|ARF6_MOUSE ADP-ribosylation factor 6 OS=Mus musculus OX=10090 GN=Arf6 PE=1 SV=2	5	8	3	2	9	3	6	6	6	4	4	6	6	3	6	0.925926	0.79691	5	5	0	9	111	175
1877	>sp|O35857|TIM44_MOUSE Mitochondrial import inner membrane translocase subunit TIM44 OS=Mus musculus OX=10090 GN=Timm44 PE=1 SV=2	6	6	4	6	7	6	5	6	5	4	4	4	3	5	6	0.896552	0.358897	5	5	0	9	110	452
1878	>sp|Q921F4|HNRLL_MOUSE Heterogeneous nuclear ribonucleoprotein L-like OS=Mus musculus OX=10090 GN=Hnrnpll PE=1 SV=3	4	8	5	7	3	1	8	6	5	4	4	5	9	5	8	0.888889	0.69643	5	5	0	9	110	591
1879	>sp|Q9CZP5|BCS1_MOUSE Mitochondrial chaperone BCS1 OS=Mus musculus OX=10090 GN=Bcs1l PE=1 SV=1	9	5	5	6	3	6	5	7	4	6	3	5	4	6	8	1	1	5	5	0	9	110	418
1880	>sp|Q62443|NPTX1_MOUSE Neuronal pentraxin-1 OS=Mus musculus OX=10090 GN=Nptx1 PE=1 SV=1	5	6	3	2	5	8	5	5	7	6	6	6	4	3	9	1.47619	0.0655877	5	5	0	9	109	432
1881	>sp|O55029|COPB2_MOUSE Coatomer subunit beta' OS=Mus musculus OX=10090 GN=Copb2 PE=1 SV=2	3	3	2	3	6	3	8	5	7	9	3	9	6	5	6	1.88235	0.0461723	5	5	0	9	108	905
1882	>sp|Q8BHZ0|CYRIA_MOUSE CYFIP-related Rac1 interactor A OS=Mus musculus OX=10090 GN=Cyria PE=1 SV=1	4	6	4	9	6	7	2	4	9	3	6	2	6	7	5	0.862069	0.629214	5	5	0	9	108	323
1883	>sp|Q9DAS9|GBG12_MOUSE Guanine nucleotide-binding protein G(I)/G(S)/G(O) subunit gamma-12 OS=Mus musculus OX=10090 GN=Gng12 PE=1 SV=3	6	4	3	5	5	6	3	8	5	7	6	5	8	4	6	1.26087	0.264467	5	5	0	9	108	72
1884	>sp|P32067|LA_MOUSE Lupus La protein homolog OS=Mus musculus OX=10090 GN=Ssb PE=1 SV=1	4	9	5	6	7	5	6	5	4	4	6	4	5	8	5	0.774194	0.173939	5	5	0	9	107	415
1885	>sp|O35954|PITM1_MOUSE Membrane-associated phosphatidylinositol transfer protein 1 OS=Mus musculus OX=10090 GN=Pitpnm1 PE=1 SV=1	5	8	8	9	2	4	6	6	7	3	3	4	4	9	3	0.8125	0.441887	5	5	0	9	105	1243
1886	>sp|Q64516|GLPK_MOUSE Glycerol kinase OS=Mus musculus OX=10090 GN=Gk PE=1 SV=2	5	7	4	5	9	3	3	7	7	4	6	6	3	5	5	0.8	0.376158	5	5	0	9	105	559
1887	>sp|Q9CYH2|PXL2A_MOUSE Peroxiredoxin-like 2A OS=Mus musculus OX=10090 GN=Prxl2a PE=1 SV=2	7	7	6	5	6	3	4	NaN	4	7	5	4	5	8	3	0.725806	0.0919141	5	4	0	9	105	218
1888	>tr|A0A0R4J2B2|A0A0R4J2B2_MOUSE BTB/POZ domain-containing protein KCTD12 OS=Mus musculus OX=10090 GN=Kctd12 PE=1 SV=1	8	7	5	NaN	5	NaN	7	8	7	6	9	NaN	9	7	NaN	1.12	0.413561	4	4	0	9	105	327
1889	>sp|P49442|INPP_MOUSE Inositol polyphosphate 1-phosphatase OS=Mus musculus OX=10090 GN=Inpp1 PE=1 SV=2	5	5	4	9	5	2	8	4	7	4	3	7	5	6	3	0.892857	0.679541	5	5	0	9	104	396
1890	>sp|Q9Z1Z0|USO1_MOUSE General vesicular transport factor p115 OS=Mus musculus OX=10090 GN=Uso1 PE=1 SV=2	6	8	9	3	8	5	NaN	3	6	8	3	3	7	4	8	0.808824	0.419851	5	4	0	9	104	959
1891	>sp|P62849|RS24_MOUSE 40S ribosomal protein S24 OS=Mus musculus OX=10090 GN=Rps24 PE=1 SV=1	4	7	NaN	9	5	4	3	4	3	4	7	5	6	9	6	0.576	0.0345583	4	5	0	9	103	133
1892	>sp|Q8C7X2|EMC1_MOUSE ER membrane protein complex subunit 1 OS=Mus musculus OX=10090 GN=Emc1 PE=1 SV=1	5	5	7	5	7	NaN	NaN	7	9	3	5	6	8	2	4	1.09195	0.724605	5	3	0	9	103	997
1893	>sp|O35465|FKBP8_MOUSE Peptidyl-prolyl cis-trans isomerase FKBP8 OS=Mus musculus OX=10090 GN=Fkbp8 PE=1 SV=2	5	5	7	5	6	3	9	4	3	4	NaN	7	7	5	6	0.821429	0.425732	5	5	0	9	102	402
1894	>sp|P97493|THIOM_MOUSE Thioredoxin, mitochondrial OS=Mus musculus OX=10090 GN=Txn2 PE=1 SV=1	4	9	8	3	9	5	2	3	6	5	4	5	2	5	4	0.636364	0.144306	5	5	0	9	102	166
1895	>sp|Q3UJU9|RMD3_MOUSE Regulator of microtubule dynamics protein 3 OS=Mus musculus OX=10090 GN=Rmdn3 PE=1 SV=2	5	3	4	5	2	3	5	9	6	8	5	4	5	5	4	1.63158	0.0839807	5	5	0	9	101	470
1896	>sp|Q99LB6|MAT2B_MOUSE Methionine adenosyltransferase 2 subunit beta OS=Mus musculus OX=10090 GN=Mat2b PE=1 SV=1	8	6	NaN	5	6	4	5	5	4	8	3	3	9	9	2	0.832	0.32853	4	5	0	9	101	334
1897	>sp|Q9D1T0|LIGO1_MOUSE Leucine-rich repeat and immunoglobulin-like domain-containing nogo receptor-interacting protein 1 OS=Mus musculus OX=10090 GN=Lingo1 PE=1 SV=1	3	3	6	1	5	5	9	5	6	3	3	2	9	5	5	1.55556	0.165772	5	5	0	9	101	614
1898	>sp|Q9CQS4|S2546_MOUSE Solute carrier family 25 member 46 OS=Mus musculus OX=10090 GN=Slc25a46 PE=1 SV=1	5	5	4	7	6	NaN	9	4	8	3	7	6	3	5	4	1.11111	0.684528	5	4	0	9	100	418
1899	>sp|P61759|PFD3_MOUSE Prefoldin subunit 3 OS=Mus musculus OX=10090 GN=Vbp1 PE=1 SV=2	6	6	4	5	5	2	5	4	4	7	6	4	9	7	4	0.846154	0.397204	5	5	0	9	99	196
1900	>sp|Q7TT50|MRCKB_MOUSE Serine/threonine-protein kinase MRCK beta OS=Mus musculus OX=10090 GN=Cdc42bpb PE=1 SV=2	2	6	6	5	5	4	2	9	4	7	3	4	9	5	8	1.08333	0.788543	5	5	0	9	99	1713
1901	>sp|Q8JZQ9|EIF3B_MOUSE Eukaryotic translation initiation factor 3 subunit B OS=Mus musculus OX=10090 GN=Eif3b PE=1 SV=1	3	9	7	3	2	3	2	5	5	7	8	7	6	3	5	0.916667	0.81033	5	5	0	9	99	803
1902	>sp|Q9D710|TMX2_MOUSE Thioredoxin-related transmembrane protein 2 OS=Mus musculus OX=10090 GN=Tmx2 PE=1 SV=1	3	NaN	1	3	5	6	7	7	8	5	4	4	9	5	4	2.2	0.00583819	4	5	0	9	99	295
1903	>sp|Q8C166|CPNE1_MOUSE Copine-1 OS=Mus musculus OX=10090 GN=Cpne1 PE=1 SV=1	9	3	5	6	5	2	2	5	4	6	5	6	5	6	7	0.678571	0.192533	5	5	0	9	98	536
1904	>sp|Q9JHU9|INO1_MOUSE Inositol-3-phosphate synthase 1 OS=Mus musculus OX=10090 GN=Isyna1 PE=1 SV=1	6	5	3	6	3	5	6	5	9	3	6	4	5	2	5	1.21739	0.425732	5	5	0	9	98	557
1905	>sp|Q61292|LAMB2_MOUSE Laminin subunit beta-2 OS=Mus musculus OX=10090 GN=Lamb2 PE=1 SV=2	7	4	9	9	2	3	2	4	3	3	3	4	6	6	8	0.483871	0.0553867	5	5	0	9	97	1799
1906	>sp|Q5RJI5|BRSK1_MOUSE Serine/threonine-protein kinase BRSK1 OS=Mus musculus OX=10090 GN=Brsk1 PE=1 SV=1	6	5	9	8	5	5	5	3	7	2	3	4	4	5	6	0.666667	0.10207	5	5	0	9	96	778
1907	>sp|Q5U3K5|RABL6_MOUSE Rab-like protein 6 OS=Mus musculus OX=10090 GN=Rabl6 PE=1 SV=2	5	5	6	7	5	5	2	5	3	3	9	3	5	7	2	0.642857	0.0241657	5	5	0	9	96	725
1908	>sp|Q6P8X1|SNX6_MOUSE Sorting nexin-6 OS=Mus musculus OX=10090 GN=Snx6 PE=1 SV=2	5	6	7	3	6	2	4	2	3	5	3	6	6	9	5	0.592593	0.0393387	5	5	0	9	96	406
1909	>sp|Q8BFZ9|ERLN2_MOUSE Erlin-2 OS=Mus musculus OX=10090 GN=Erlin2 PE=1 SV=1	4	4	4	5	3	3	6	6	7	5	1	9	2	5	5	1.35	0.0982817	5	5	0	9	96	340
1910	>sp|Q9Z2A0|PDPK1_MOUSE 3-phosphoinositide-dependent protein kinase 1 OS=Mus musculus OX=10090 GN=Pdpk1 PE=1 SV=2	6	5	4	5	7	4	5	4	9	2	2	7	3	4	5	0.888889	0.647934	5	5	0	9	96	559
1911	>sp|Q9D2V7|CORO7_MOUSE Coronin-7 OS=Mus musculus OX=10090 GN=Coro7 PE=1 SV=2	3	7	8	8	2	3	3	8	3	4	3	6	9	6	3	0.75	0.41055	5	5	0	9	95	922
1912	>sp|O35226|PSMD4_MOUSE 26S proteasome non-ATPase regulatory subunit 4 OS=Mus musculus OX=10090 GN=Psmd4 PE=1 SV=1	7	6	NaN	8	4	6	5	NaN	5	9	NaN	5	1	8	6	1	1	4	4	0	9	93	376
1913	>sp|O70194|EIF3D_MOUSE Eukaryotic translation initiation factor 3 subunit D OS=Mus musculus OX=10090 GN=Eif3d PE=1 SV=2	7	5	5	8	3	4	4	5	4	9	4	4	4	6	7	0.928571	0.76684	5	5	0	9	93	548
1914	>sp|P54822|PUR8_MOUSE Adenylosuccinate lyase OS=Mus musculus OX=10090 GN=Adsl PE=1 SV=2	6	5	6	8	3	2	NaN	5	3	4	2	5	6	5	9	0.625	0.0933354	5	4	0	9	93	484
1915	>sp|Q7TME0|PLPR4_MOUSE Phospholipid phosphatase-related protein type 4 OS=Mus musculus OX=10090 GN=Plppr4 PE=1 SV=2	4	7	8	NaN	3	3	2	6	6	6	1	3	7	5	5	0.836364	0.551455	4	5	0	9	93	766
1916	>sp|Q8CI71|VPS50_MOUSE Syndetin OS=Mus musculus OX=10090 GN=Vps50 PE=1 SV=2	3	8	4	3	5	1	6	6	5	4	4	NaN	4	2	8	0.956522	0.88257	5	5	0	9	92	964
1917	>sp|Q61599|GDIR2_MOUSE Rho GDP-dissociation inhibitor 2 OS=Mus musculus OX=10090 GN=Arhgdib PE=1 SV=3	3	6	5	2	3	3	3	3	6	8	4	3	4	4	4	1.21053	0.544737	5	5	0	9	90	200
1918	>sp|Q6RHR9|MAGI1_MOUSE Membrane-associated guanylate kinase, WW and PDZ domain-containing protein 1 OS=Mus musculus OX=10090 GN=Magi1 PE=1 SV=1	5	8	NaN	3	4	4	NaN	9	5	3	7	4	6	4	3	1.05	0.888015	4	4	0	9	90	1471
1919	>sp|Q9D1P4|CHRD1_MOUSE Cysteine and histidine-rich domain-containing protein 1 OS=Mus musculus OX=10090 GN=Chordc1 PE=1 SV=1	4	6	5	7	4	NaN	3	2	5	1	3	4	7	2	8	0.528846	0.044079	5	4	0	9	90	331
1920	>sp|Q14BI2|GRM2_MOUSE Metabotropic glutamate receptor 2 OS=Mus musculus OX=10090 GN=Grm2 PE=1 SV=2	5	9	5	7	3	4	3	5	7	6	1	3	4	3	4	0.862069	0.537191	5	5	0	9	89	872
1921	>sp|Q6NZJ6|IF4G1_MOUSE Eukaryotic translation initiation factor 4 gamma 1 OS=Mus musculus OX=10090 GN=Eif4g1 PE=1 SV=1	5	NaN	NaN	7	5	6	5	6	6	NaN	2	NaN	4	9	9	1.01471	0.900138	3	4	0	9	89	1600
1922	>sp|Q91ZR1|RAB4B_MOUSE Ras-related protein Rab-4B OS=Mus musculus OX=10090 GN=Rab4b PE=1 SV=2	4	4	NaN	3	NaN	2	5	5	6	9	6	7	4	3	5	1.47273	0.296544	3	5	0	9	89	213
1923	>sp|Q9CXW4|RL11_MOUSE 60S ribosomal protein L11 OS=Mus musculus OX=10090 GN=Rpl11 PE=1 SV=4	3	3	5	5	6	3	4	3	4	6	2	5	3	3	9	0.909091	0.635687	5	5	0	9	89	178
1924	>sp|O88533|DDC_MOUSE Aromatic-L-amino-acid decarboxylase OS=Mus musculus OX=10090 GN=Ddc PE=1 SV=1	5	2	2	7	2	5	3	2	7	5	5	4	6	4	3	1.22222	0.569561	5	5	0	9	88	480
1925	>sp|P56379|ATP68_MOUSE ATP synthase subunit ATP5MPL, mitochondrial OS=Mus musculus OX=10090 GN=Atp5mpl PE=1 SV=1	3	2	9	1	7	3	7	5	6	3	6	5	4	2	4	1.09091	0.823158	5	5	0	9	88	58
1926	>sp|P62751|RL23A_MOUSE 60S ribosomal protein L23a OS=Mus musculus OX=10090 GN=Rpl23a PE=1 SV=1	6	6	4	4	9	4	NaN	5	1	6	4	1	7	4	5	0.689655	0.241594	5	4	0	9	88	156
1927	>sp|Q7TNR6|IGS21_MOUSE Immunoglobulin superfamily member 21 OS=Mus musculus OX=10090 GN=Igsf21 PE=1 SV=1	6	7	4	4	3	3	4	7	3	3	4	3	5	3	3	0.833333	0.475148	5	5	0	9	88	468
1928	>sp|Q8K4G5|ABLM1_MOUSE Actin-binding LIM protein 1 OS=Mus musculus OX=10090 GN=Ablim1 PE=1 SV=1	9	8	NaN	7	3	NaN	2	4	5	2	4	5	4	7	9	0.481481	0.060102	4	4	0	9	88	861
1929	>sp|A2AJA9|AJM1_MOUSE Apical junction component 1 homolog OS=Mus musculus OX=10090 GN=Ajm1 PE=1 SV=1	4	9	2	7	5	2	5	4	4	6	2	3	NaN	4	4	0.777778	0.40935	5	5	0	9	87	974
1930	>sp|O54988|SLK_MOUSE STE20-like serine/threonine-protein kinase OS=Mus musculus OX=10090 GN=Slk PE=1 SV=2	6	6	4	7	3	NaN	2	4	4	7	1	2	8	3	3	0.817308	0.465321	5	4	0	9	87	1233
1931	>sp|P47199|QOR_MOUSE Quinone oxidoreductase OS=Mus musculus OX=10090 GN=Cryz PE=1 SV=1	3	6	6	3	9	1	4	3	6	3	7	3	5	4	7	0.62963	0.186905	5	5	0	9	87	331
1932	>sp|Q11136|PEPD_MOUSE Xaa-Pro dipeptidase OS=Mus musculus OX=10090 GN=Pepd PE=1 SV=3	1	5	3	3	3	3	5	3	8	4	4	3	5	4	5	1.53333	0.19187	5	5	0	9	87	493
1933	>sp|Q9CRD0|OCAD1_MOUSE OCIA domain-containing protein 1 OS=Mus musculus OX=10090 GN=Ociad1 PE=1 SV=1	3	6	6	1	NaN	6	1	6	3	NaN	6	1	5	4	2	1	1	4	4	0	9	87	247
1934	>sp|O54865|GCYB1_MOUSE Guanylate cyclase soluble subunit beta-1 OS=Mus musculus OX=10090 GN=Gucy1b1 PE=1 SV=1	NaN	5	4	NaN	NaN	1	8	6	9	4	6	4	7	3	6	1.24444	0.668008	2	5	0	9	86	620
1935	>sp|P21460|CYTC_MOUSE Cystatin-C OS=Mus musculus OX=10090 GN=Cst3 PE=1 SV=2	9	3	NaN	8	2	5	4	5	8	4	8	4	6	2	5	0.945455	0.868956	4	5	0	9	86	140
1936	>sp|Q9CWE0|MFR1L_MOUSE Mitochondrial fission regulator 1-like OS=Mus musculus OX=10090 GN=Mtfr1l PE=1 SV=1	5	5	6	9	5	3	3	7	4	5	1	6	3	5	1	0.733333	0.175699	5	5	0	9	86	289
1937	>sp|Q91YX5|LGAT1_MOUSE Acyl-CoA:lysophosphatidylglycerol acyltransferase 1 OS=Mus musculus OX=10090 GN=Lpgat1 PE=1 SV=1	5	9	5	5	NaN	NaN	5	6	3	4	6	1	2	8	4	0.75	0.254374	4	4	0	9	85	370
1938	>sp|Q99KE1|MAOM_MOUSE NAD-dependent malic enzyme, mitochondrial OS=Mus musculus OX=10090 GN=Me2 PE=1 SV=1	4	9	6	6	5	3	2	5	5	3	5	2	1	5	3	0.6	0.0480801	5	5	0	9	85	589
1939	>sp|O55234|PSB5_MOUSE Proteasome subunit beta type-5 OS=Mus musculus OX=10090 GN=Psmb5 PE=1 SV=3	6	5	2	4	4	5	5	5	7	3	9	3	3	6	4	1.19048	0.408168	5	5	0	9	84	264
1940	>sp|P31230|AIMP1_MOUSE Aminoacyl tRNA synthase complex-interacting multifunctional protein 1 OS=Mus musculus OX=10090 GN=Aimp1 PE=1 SV=2	NaN	4	5	4	4	3	2	8	7	2	3	3	6	1	7	1.03529	0.921973	4	5	0	9	84	310
1941	>sp|P40336|VP26A_MOUSE Vacuolar protein sorting-associated protein 26A OS=Mus musculus OX=10090 GN=Vps26a PE=1 SV=1	3	7	5	5	3	1	5	4	1	5	3	2	6	4	4	0.695652	0.27069	5	5	0	9	84	327
1942	>sp|Q6A0A9|F120A_MOUSE Constitutive coactivator of PPAR-gamma-like protein 1 OS=Mus musculus OX=10090 GN=FAM120A PE=1 SV=2	5	4	7	7	6	1	5	1	4	6	2	4	2	9	6	0.586207	0.0770518	5	5	0	9	84	1112
1943	>sp|Q6PHN9|RAB35_MOUSE Ras-related protein Rab-35 OS=Mus musculus OX=10090 GN=Rab35 PE=1 SV=1	5	9	4	8	1	5	3	3	8	2	4	5	3	8	4	0.777778	0.521227	5	5	0	9	84	201
1944	>sp|Q8CHU3|EPN2_MOUSE Epsin-2 OS=Mus musculus OX=10090 GN=Epn2 PE=1 SV=1	6	5	7	3	3	NaN	3	NaN	3	5	9	5	6	NaN	7	0.763889	0.371085	5	3	0	9	84	595
1945	>sp|Q99K70|RRAGC_MOUSE Ras-related GTP-binding protein C OS=Mus musculus OX=10090 GN=Rragc PE=1 SV=1	6	7	3	3	NaN	2	6	5	5	9	3	2	5	5	3	1.13684	0.689762	4	5	0	9	84	398
1946	>sp|P51830|ADCY9_MOUSE Adenylate cyclase type 9 OS=Mus musculus OX=10090 GN=Adcy9 PE=1 SV=1	3	9	3	8	3	NaN	NaN	2	6	6	5	5	4	3	6	0.897436	0.803817	5	3	0	9	83	1353
1947	>sp|P55264|ADK_MOUSE Adenosine kinase OS=Mus musculus OX=10090 GN=Adk PE=1 SV=2	5	7	4	5	4	3	4	2	9	6	2	NaN	5	NaN	8	0.96	0.886431	5	5	0	9	83	361
1948	>sp|Q9D0S9|HINT2_MOUSE Histidine triad nucleotide-binding protein 2, mitochondrial OS=Mus musculus OX=10090 GN=Hint2 PE=1 SV=1	4	9	4	3	4	4	2	3	3	3	3	6	4	6	2	0.625	0.14466	5	5	0	9	83	163
1949	>sp|Q3UVX5|GRM5_MOUSE Metabotropic glutamate receptor 5 OS=Mus musculus OX=10090 GN=Grm5 PE=1 SV=2	4	7	9	2	5	5	2	NaN	6	4	3	4	NaN	6	6	0.787037	0.485505	5	4	0	9	82	1203
1950	>sp|Q8QZV4|ST32C_MOUSE Serine/threonine-protein kinase 32C OS=Mus musculus OX=10090 GN=Stk32c PE=1 SV=1	3	6	6	5	9	NaN	3	4	2	4	4	2	5	3	4	0.560345	0.0669619	5	4	0	9	82	488
1951	>sp|Q91YD9|WASL_MOUSE Neural Wiskott-Aldrich syndrome protein OS=Mus musculus OX=10090 GN=Wasl PE=1 SV=1	5	5	6	1	2	3	5	4	3	3	4	9	NaN	6	4	0.947368	0.853517	5	5	0	9	82	501
1952	>sp|Q99JY8|PLPP3_MOUSE Phospholipid phosphatase 3 OS=Mus musculus OX=10090 GN=Plpp3 PE=1 SV=1	3	9	1	5	7	5	4	3	3	3	5	1	3	3	5	0.72	0.368694	5	5	0	9	82	312
1953	>sp|Q9DC07|LNEBL_MOUSE LIM zinc-binding domain-containing Nebulette OS=Mus musculus OX=10090 GN=Nebl PE=1 SV=1	5	3	3	NaN	3	7	3	2	9	2	2	1	6	3	7	1.31429	0.534871	4	5	0	9	82	270
1954	>sp|Q6PDI5|ECM29_MOUSE Proteasome adapter and scaffold protein ECM29 OS=Mus musculus OX=10090 GN=Ecpas PE=1 SV=3	1	5	7	5	5	2	3	4	6	5	4	NaN	8	NaN	9	0.869565	0.632852	5	5	0	9	81	1840
1955	>sp|Q810B6|ANFY1_MOUSE Rabankyrin-5 OS=Mus musculus OX=10090 GN=Ankfy1 PE=1 SV=2	NaN	9	3	5	5	NaN	2	5	4	5	2	1	7	5	8	0.727273	0.338752	4	4	0	9	81	1169
1956	>sp|Q8BH55|THNS1_MOUSE Threonine synthase-like 1 OS=Mus musculus OX=10090 GN=Thnsl1 PE=1 SV=1	5	4	2	2	5	1	5	5	2	8	4	4	4	4	7	1.16667	0.682552	5	5	0	9	81	747
1957	>sp|O88587|COMT_MOUSE Catechol O-methyltransferase OS=Mus musculus OX=10090 GN=Comt PE=1 SV=2	NaN	4	3	3	1	5	4	1	6	9	6	3	5	4	3	1.81818	0.197022	4	5	0	9	80	265
1958	>sp|Q9CR09|UFC1_MOUSE Ubiquitin-fold modifier-conjugating enzyme 1 OS=Mus musculus OX=10090 GN=Ufc1 PE=1 SV=1	6	9	3	4	5	1	4	1	4	5	4	NaN	6	6	6	0.555556	0.108045	5	5	0	9	80	167
1959	>sp|Q9D164|FXYD6_MOUSE FXYD domain-containing ion transport regulator 6 OS=Mus musculus OX=10090 GN=Fxyd6 PE=1 SV=2	6	5	4	3	5	1	3	4	4	5	2	4	5	3	3	0.73913	0.195016	5	5	0	9	80	94
1960	>sp|O35343|IMA3_MOUSE Importin subunit alpha-3 OS=Mus musculus OX=10090 GN=Kpna4 PE=1 SV=1	4	5	7	NaN	NaN	5	NaN	6	NaN	5	2	4	NaN	4	4	1	1	3	3	0	9	79	521
1961	>sp|P27612|PLAP_MOUSE Phospholipase A-2-activating protein OS=Mus musculus OX=10090 GN=Plaa PE=1 SV=4	1	4	5	1	6	NaN	4	4	5	4	2	3	9	4	4	1.25	0.497432	5	4	0	9	79	794
1962	>sp|P61358|RL27_MOUSE 60S ribosomal protein L27 OS=Mus musculus OX=10090 GN=Rpl27 PE=1 SV=2	3	4	1	NaN	2	3	6	9	7	2	7	2	4	3	3	2.16	0.106675	4	5	0	9	79	136
1963	>sp|Q9WV18|GABR1_MOUSE Gamma-aminobutyric acid type B receptor subunit 1 OS=Mus musculus OX=10090 GN=Gabbr1 PE=1 SV=1	2	NaN	5	6	3	4	3	5	9	2	5	2	6	3	4	1.15	0.716657	4	5	0	9	78	960
1964	>sp|P61022|CHP1_MOUSE Calcineurin B homologous protein 1 OS=Mus musculus OX=10090 GN=Chp1 PE=1 SV=2	4	4	3	NaN	NaN	1	7	6	4	2	6	4	4	2	6	1.09091	0.835767	3	5	0	9	77	195
1965	>sp|Q3UH60|DIP2B_MOUSE Disco-interacting protein 2 homolog B OS=Mus musculus OX=10090 GN=Dip2b PE=1 SV=1	4	6	4	8	NaN	3	4	NaN	9	NaN	NaN	2	NaN	5	5	0.969697	0.934267	4	3	0	9	77	1574
1966	>sp|Q9Z1R2|BAG6_MOUSE Large proline-rich protein BAG6 OS=Mus musculus OX=10090 GN=Bag6 PE=1 SV=1	8	NaN	6	NaN	3	6	NaN	NaN	7	NaN	3	1	5	6	6	1.14706	0.692471	3	2	0	9	76	1154
1967	>tr|A0A338P6P7|A0A338P6P7_MOUSE Protein kinase C and casein kinase substrate in neurons protein 2 (Fragment) OS=Mus musculus OX=10090 GN=Pacsin2 PE=1 SV=1	1	6	9	5	4	NaN	1	6	NaN	1	2	4	6	1	1	0.533333	0.313701	5	3	0	9	76	180
1968	>sp|Q99LI8|HGS_MOUSE Hepatocyte growth factor-regulated tyrosine kinase substrate OS=Mus musculus OX=10090 GN=Hgs PE=1 SV=2	3	5	4	4	5	2	7	3	NaN	3	3	3	6	3	9	0.892857	0.684528	5	4	0	9	75	775
1969	>sp|Q9WTQ5|AKA12_MOUSE A-kinase anchor protein 12 OS=Mus musculus OX=10090 GN=Akap12 PE=1 SV=1	1	4	9	2	NaN	2	2	8	3	4	5	2	5	2	3	0.95	0.923501	4	5	0	9	75	1684
1970	>tr|F7BAB2|F7BAB2_MOUSE Transmembrane protein 132B OS=Mus musculus OX=10090 GN=Tmem132b PE=1 SV=1	6	9	6	4	NaN	3	2	5	2	3	3	2	4	5	4	0.48	0.0210982	4	5	0	9	75	1078
1971	>sp|P29391|FRIL1_MOUSE Ferritin light chain 1 OS=Mus musculus OX=10090 GN=Ftl1 PE=1 SV=2	9	NaN	5	NaN	NaN	7	NaN	6	5	NaN	8	NaN	4	8	NaN	0.857143	0.590801	2	3	0	9	74	183
1972	>sp|Q9D7B6|ACAD8_MOUSE Isobutyryl-CoA dehydrogenase, mitochondrial OS=Mus musculus OX=10090 GN=Acad8 PE=1 SV=2	2	2	6	9	1	1	5	4	6	4	2	1	8	8	5	1	1	5	5	0	9	74	413
1973	>sp|Q3UGY8|BIG3_MOUSE Brefeldin A-inhibited guanine nucleotide-exchange protein 3 OS=Mus musculus OX=10090 GN=Arfgef3 PE=1 SV=1	1	3	NaN	3	4	5	6	2	8	4	1	NaN	5	2	9	1.81818	0.117646	4	5	0	9	73	2170
1974	>sp|Q80TV8-2|CLAP1_MOUSE Isoform 2 of CLIP-associating protein 1 OS=Mus musculus OX=10090 GN=Clasp1	NaN	4	3	5	5	NaN	NaN	6	4	3	NaN	5	7	9	NaN	1.01961	0.932094	4	3	0	9	73	1525
1975	>sp|Q8K2K6|AGFG1_MOUSE Arf-GAP domain and FG repeat-containing protein 1 OS=Mus musculus OX=10090 GN=Agfg1 PE=1 SV=2	4	3	5	6	5	NaN	9	3	5	3	9	NaN	5	NaN	7	1.08696	0.778786	5	4	0	9	72	561
1976	>sp|Q91V76|CK054_MOUSE Ester hydrolase C11orf54 homolog OS=Mus musculus OX=10090 PE=1 SV=1	2	4	4	3	4	2	1	1	5	NaN	2	1	4	6	9	0.661765	0.263977	5	4	0	9	72	315
1977	>sp|O35841|API5_MOUSE Apoptosis inhibitor 5 OS=Mus musculus OX=10090 GN=Api5 PE=1 SV=2	9	1	3	2	2	3	3	4	4	7	3	1	5	4	1	1.23529	0.633139	5	5	0	9	71	504
1978	>sp|Q8BL66|EEA1_MOUSE Early endosome antigen 1 OS=Mus musculus OX=10090 GN=Eea1 PE=1 SV=2	5	3	5	2	5	9	3	NaN	2	5	2	3	3	7	2	1.1875	0.640497	5	4	0	9	71	1411
1979	>sp|Q8C167|PPCEL_MOUSE Prolyl endopeptidase-like OS=Mus musculus OX=10090 GN=Prepl PE=1 SV=1	1	4	4	4	4	3	3	4	3	3	3	4	3	4	1	0.941176	0.759923	5	5	0	9	71	725
1980	>tr|Q3UJB0|Q3UJB0_MOUSE Splicing factor 3b, subunit 2 OS=Mus musculus OX=10090 GN=Sf3b2 PE=1 SV=1	3	6	6	4	5	4	4	2	NaN	9	2	5	1	4	NaN	0.989583	0.973791	5	4	0	9	71	878
1981	>sp|A2A690|TANC2_MOUSE Protein TANC2 OS=Mus musculus OX=10090 GN=Tanc2 PE=1 SV=1	3	4	2	9	4	2	5	5	5	5	4	2	2	5	4	1	1	5	5	0	9	70	1994
1982	>sp|P49025|CTRO_MOUSE Citron Rho-interacting kinase OS=Mus musculus OX=10090 GN=Cit PE=1 SV=3	9	NaN	4	6	4	2	NaN	NaN	NaN	5	3	NaN	6	5	3	0.608696	0.322696	4	2	0	9	68	2055
1983	>sp|Q8C078|KKCC2_MOUSE Calcium/calmodulin-dependent protein kinase kinase 2 OS=Mus musculus OX=10090 GN=Camkk2 PE=1 SV=2	4	7	NaN	NaN	NaN	9	6	NaN	NaN	4	NaN	6	7	5	NaN	1.15152	0.728171	2	3	0	9	68	588
1984	>sp|Q9ER72|SYCC_MOUSE Cysteine--tRNA ligase, cytoplasmic OS=Mus musculus OX=10090 GN=Cars1 PE=1 SV=2	2	2	2	2	2	NaN	NaN	3	2	9	NaN	6	9	2	7	2.33333	0.145849	5	3	0	9	68	831
1985	>sp|P43276|H15_MOUSE Histone H1.5 OS=Mus musculus OX=10090 GN=H1-5 PE=1 SV=2	4	4	8	5	5	5	NaN	NaN	8	NaN	NaN	NaN	2	9	5	1.25	0.41509	5	2	0	9	66	223
1986	>sp|Q9Z1X4|ILF3_MOUSE Interleukin enhancer-binding factor 3 OS=Mus musculus OX=10090 GN=Ilf3 PE=1 SV=2	1	4	7	6	NaN	NaN	NaN	NaN	NaN	4	NaN	4	7	3	5	0.888889	#DIV/0!	4	1	0	9	66	898
1987	>sp|Q6PGF7|EXOC8_MOUSE Exocyst complex component 8 OS=Mus musculus OX=10090 GN=Exoc8 PE=1 SV=1	9	3	6	5	1	4	2	NaN	3	2	2	3	6	3	6	0.572917	0.239459	5	4	0	9	65	716
1988	>sp|Q8K400|STXB5_MOUSE Syntaxin-binding protein 5 OS=Mus musculus OX=10090 GN=Stxbp5 PE=1 SV=3	NaN	6	3	5	9	2	5	5	NaN	2	3	1	2	5	6	0.608696	0.189473	4	4	0	9	65	1152
1989	>sp|Q8BMG7|RBGPR_MOUSE Rab3 GTPase-activating protein non-catalytic subunit OS=Mus musculus OX=10090 GN=Rab3gap2 PE=1 SV=2	3	NaN	5	6	9	NaN	NaN	4	5	NaN	NaN	NaN	4	5	NaN	0.782609	0.546509	4	2	0	9	64	1366
1990	>tr|A0A0R4IZW8|A0A0R4IZW8_MOUSE Calpain small subunit 1 OS=Mus musculus OX=10090 GN=Capns1 PE=1 SV=1	NaN	7	6	NaN	NaN	NaN	NaN	8	NaN	NaN	NaN	7	NaN	7	9	1.23077	#DIV/0!	2	1	0	9	64	268
1991	>sp|Q6PB44|PTN23_MOUSE Tyrosine-protein phosphatase non-receptor type 23 OS=Mus musculus OX=10090 GN=Ptpn23 PE=1 SV=2	3	2	5	2	2	4	6	3	2	6	NaN	2	3	9	3	1.5	0.195016	5	5	0	9	63	1692
1992	>sp|Q8WTY4|CPIN1_MOUSE Anamorsin OS=Mus musculus OX=10090 GN=Ciapin1 PE=1 SV=1	1	3	3	3	4	NaN	NaN	3	1	2	5	2	2	4	3	0.714286	0.343166	5	3	0	9	63	309
1993	>sp|P47802|MTX1_MOUSE Metaxin-1 OS=Mus musculus OX=10090 GN=Mtx1 PE=1 SV=1	NaN	NaN	5	5	5	NaN	3	NaN	7	NaN	6	3	3	3	9	1	1	3	2	0	9	62	317
1994	>sp|Q8BSS9|LIPA2_MOUSE Liprin-alpha-2 OS=Mus musculus OX=10090 GN=Ppfia2 PE=1 SV=2	2	NaN	5	5	2	2	3	NaN	3	2	2	2	4	1	4	0.714286	0.315334	4	4	0	9	61	1257
1995	>sp|Q8R1N4|NUDC3_MOUSE NudC domain-containing protein 3 OS=Mus musculus OX=10090 GN=Nudcd3 PE=1 SV=3	2	4	NaN	2	2	3	3	NaN	4	NaN	2	2	NaN	8	4	1.33333	0.258629	4	3	0	9	60	363
1996	>sp|Q91VC3|IF4A3_MOUSE Eukaryotic initiation factor 4A-III OS=Mus musculus OX=10090 GN=Eif4a3 PE=1 SV=3	NaN	5	5	NaN	NaN	NaN	4	3	NaN	5	NaN	3	2	6	NaN	0.8	0.272228	2	3	0	9	56	411
[truncated: 4,734 more rows]

## Sheet: summary p<05
5X-VEH v NCAR	fold change	pvalue	5X-MAB v 5X-VEH	fold change	pvalue		5X-VEH v NCAR	fold change	pvalue	5X-MAB v 5X-VEH	fold change	pvalue
Stxbp5l	3.75	0.0379966	Ccdc177	3.25	0.0106117		Stxbp5l	3.75	0.0379966	Ccdc177	3.25	0.0106117
Pafah1b3	2.85714	0.0115892	Gfm1	2.91667	0.00296311		Pafah1b3	2.85714	0.0115892	Gfm1	2.91667	0.00296311
Reps1	2.8	0.00967895	Fbxo41	2.8125	0.00896059		Reps1	2.8	0.00967895	Fbxo41	2.8125	0.00896059
Gga1	2.8	0.0330425	Bcam	2.75	0.00954199		Gga1	2.8	0.0330425	Bcam	2.75	0.00954199
Farsb	2.59615	0.000660116	Fxr2	2.75	0.0351685		Farsb	2.59615	0.000660116	Fxr2	2.75	0.0351685
App	2.48276	0.00059297	Picalm	2.66667	0.0389278		App	2.48276	0.00059297	Picalm	2.66667	0.0389278
Sae1	2.46154	0.00416666	Rab1A	2.57333	0.0248513		Sae1	2.46154	0.00416666	Rab1A	2.57333	0.0248513
Rpl37a	2.4	0.0271726	Camkk1	2.5	0.0331455		Rpl37a	2.4	0.0271726	Camkk1	2.5	0.0331455
Plch2	2.35714	0.0114624	Tmem14c	2.4	0.00954199		Plch2	2.35714	0.0114624	Tmem14c	2.4	0.00954199
Atg3	2.29167	0.0124405	Ecsit	2.4	0.0271726		Atg3	2.29167	0.0124405	Ecsit	2.4	0.0271726
Septin4	2.28571	0.0440936	Immt	2.27419	0.0364162		Septin4	2.28571	0.0440936	Immt	2.27419	0.0364162
Cryl1	2.25	0.0290154	S100a6	2.25	0.00749043		Cryl1	2.25	0.0290154	S100a6	2.25	0.00749043
Apool	2.2	0.0321045	Agfg2	2.25	0.0304663		Apool	2.2	0.0321045	Agfg2	2.25	0.0304663
Tmx2	2.2	0.00583819	Nans	2.22222	0.00799943		Tmx2	2.2	0.00583819	Nans	2.22222	0.00799943
Akt3	2.1875	0.0114713	Dlgap2	2.16667	0.0343166		Akt3	2.1875	0.0114713	Dlgap2	2.16667	0.0343166
Cox7a2l	2.18182	0.0139069	Luc7l3	2.03704	0.0366424		Cox7a2l	2.18182	0.0139069	Luc7l3	2.03704	0.0366424
Synj2bp	2.14286	0.000181882	Vmp1	2	0.0269522		Synj2bp	2.14286	0.000181882	Vmp1	2	0.0269522
Gpr37l1	2.14286	0.000690812	Ass1	1.93333	0.011615		Gpr37l1	2.14286	0.000690812	Mms19	0.5	0.0169647
Exoc2	2	0.0134	Epn2	1.84091	0.0442615		Exoc2	2	0.0134	Tra2b	0.5	0.0169647
Sparcl1	2	0.0144178	Rps24	1.83333	0.00316412		Sparcl1	2	0.0144178	Scrn3	0.5	0.0222039
Lman2	2	0.0241101	Vat1l	1.83333	0.0265909		Lman2	2	0.0241101	Cacnb3	0.5	0.0498253
Gng2	2	0.0489956	Ddx19b	1.83333	0.0304663		Gng2	2	0.0489956	Acss2	0.428571	0.0161301
Apoe	1.98718	0.0139501	Wbp2	1.83333	0.0447086		Qars1	0.5	0.0220701	Hid1	0.428571	0.0161301
Gfap	1.92247	0.000668693	Ufc1	1.83333	0.0480674		Fam114a2	0.5	0.0257214	Synj2bp	0.416667	9.33727e-05
Eif3h	1.91667	0.00461517	Mpp1	1.82692	0.0197333		Rpl19	0.5	0.0269522	Tmed7	0.416667	0.0271726
Eef1d	1.9	0.0121217	Rap2b	1.82143	0.0504708		Ptgds	0.5	0.0302015	Ncln	0.375	0.00369312
Copb2	1.88235	0.0461723	Lamb2	1.8	0.0322138		Stk39	0.5	0.0438246	Ndufb3	0.333333	0.01669
Ube2d2	1.875	0.00954199	Map7d2	1.77778	0.00302364		Tmem132b	0.48	0.0210982	Pafah1b3	0.3125	0.0186227
Mms19	1.875	0.0456591	Mccc1	1.77273	0.0469573		Fam171a2	0.473684	0.030766	Pptc7	0.285714	0.00122492
Ssr4	1.875	0.0479117	Polr2h	1.76	0.0196748		Shank2	0.470588	0.00476225	Stxbp5l	0.2	0.0257214
Sf3a1	1.81818	0.0479448	Myg1	1.75	0.0257214		Coro1b	0.469388	0.025424
Aprt	1.75	0.0277844	Rin1	1.75	0.0331455		Mapre1	0.469136	0.000295563
Tpd52l2	1.73333	0.0378567	Dbt	1.73333	0.00544251		Fbxo41	0.457143	0.0196748
Scrn3	1.66667	0.0460249	Atl3	1.71429	0.0207211		Tjp1	0.457143	0.034564
Tra2b	1.66667	0.0498253	Rheb	1.70588	0.0277844		Rin1	0.454545	0.0399685
Cmpk2	1.66667	0.0399685	Surf4	1.7	0.0176483		Rpl36	0.45	0.0329352
Rab21	1.5625	0.0265099	Epn1	1.7	0.0291798		Stx7	0.444444	0.0212086
Bckdk	1.55556	0.030515	Get3	1.67568	0.0269198		Raly	0.444444	0.00245234
Ddx39b	1.53061	0.00160306	Fbxo2	1.66667	0.0207114		Sik3	0.441176	0.00565548
Irgq	1.47059	0.00394977	Tgm2	1.66667	0.0498253		Coa3	0.4375	0.0303487
S100a1	1.46154	0.00944233	Nit2	1.65217	0.00766973		Sorbs2	0.423077	0.0113544
Ddt	1.46	0.0406916	Mfn2	1.65	0.0422411		Plcl2	0.416667	0.00149552
Slc25a51	1.45455	0.0461723	Syngr3	1.63636	0.0363721		Aldh18a1	0.416667	0.0376022
Tollip	1.44737	0.0334983	Akr7a2	1.63636	0.0454991		Stxbp1	0.416667	0.00456336
Dnm1	1.44	0.0337808	Cox6b1	1.61111	0.0120622		Nae1	0.416667	0.0232372
Myl12b	1.43333	0.035512	Ranbp1	1.6087	0.034982		Iqsec2	0.405844	0.0331113
Sec23a	1.37209	0.0488032	Camk1d	1.59259	0.0276941		Tpm1	0.395349	0.0401899
Tnpo2	1.37195	0.0422824	Trap1	1.58065	0.0106336		Psmd9	0.392157	0.0390325
Mat2a	1.35417	0.0271395	Bag5	1.53333	0.0460249		Camkk1	0.357143	0.000433929
Txnrd1	1.34694	0.0305006	Tomm22	1.5122	0.0389329		Immt	0.356835	0.0143286
Psmb4	1.29545	0.0450024	Acot9	1.46154	0.0147016		Katnal1	0.347826	0.016011
Cds2	1.27273	0.0195763	Vim	1.44545	0.0326698		Vmp1	0.333333	0.0269522
Psmc6	1.27083	0.0316178	Ppp3r1	1.44037	0.0457748		Tkfc	0.333333	0.0498253
Prkcg	0.917127	0.0493374	Txndc17	1.41176	0.033855		ATP5IF1	0.326531	0.000499487
Cct2	0.89011	0.0444092	Septin2	1.37209	0.0441898		Tnks1bp1	0.3125	0.00465327
Pclo	0.877934	0.0319377	Inpp4a	1.34483	0.0304663		Ccdc177	0.25	0.0157798
Pcmt1	0.877049	0.0461723	Cadm1	1.33681	0.0171984		Arfgef1	0.214286	0.0389255
Tmod2	0.861314	0.0372413	Septin3	1.30682	0.0210109		Kif1a	0.0625	0.00209001
Dld	0.843396	0.0208367	Hnrnpa2b1	1.28472	0.0396294
Map2	0.842275	0.0426445	Hnrnpa0	1.25806	0.0497356
Hadha	0.841346	0.0307903	Coq9	1.2381	0.0461723
Map1b	0.828528	0.0210301	Gstp1	1.2349	0.0210699
Srcin1	0.827586	0.0443515	Actr1a	1.22449	0.0105932
Syn1	0.825117	0.00575677	Sfxn1	1.2069	0.0322138
Sptan1	0.824146	0.0269798	Cap1	1.20321	0.0466892
Cap1	0.820175	0.0194771	Tmod2	1.16949	0.0386376
Plec	0.819196	0.0203628	Crym	1.16456	0.0467454
Epb41l3	0.817021	0.0376672	Acly	1.13932	0.0396412
Hspd1	0.813273	0.0202767	Matr3	1.12782	0.0261604
Inpp4a	0.805556	0.025031	Oxr1	0.888889	0.0229636
Npepps	0.803419	0.0432073	Aifm1	0.792453	0.0423894
Hnrnpa1	0.790598	0.00135583	Gak	0.78	0.0221819
Cox6b1	0.789474	0.0399685	Prps1	0.768	0.0383902
Cotl1	0.789474	0.0460249	Grin1	0.731707	0.0221819
Hnrnpa2b1	0.780488	0.00590069	Mog	0.728205	0.00542984
Tomm70	0.776824	0.0228506	Rps4x	0.727273	0.0399685
Sh3glb2	0.776786	0.0025463	Cds2	0.696429	0.0305006
Mtch1	0.775	0.014958	Pdhx	0.677083	0.0501401
Lgi1	0.772277	0.011654	Kpna4	0.65625	0.0378567
Atp2b3	0.771429	0.0254636	Farsb	0.651852	0.0421142
Myh10	0.76969	0.0159002	Mal2	0.642857	0.0219894
Tufm	0.768473	0.0158267	Irgq	0.64	0.0399685
Ndufa10	0.767857	0.0352195	Cryl1	0.622222	0.0474149
Ppid	0.761905	0.0193712	Vps13c	0.6	0.0337978
Gstp1	0.760204	0.0181262	Gria1	0.6	0.0337978
Ndufs2	0.756654	0.00957238	Ppt1	0.586957	0.0461985
Hnrnpk	0.756338	0.0237834	Aspa	0.575758	0.0454991
Sptbn2	0.756133	0.0166014	Snrpd1	0.567568	0.00505561
Dync1li1	0.74026	0.0303601	Plch2	0.545455	0.0377496
Pacsin1	0.73494	0.0397321	Ube2k	0.517647	0.0109551
Psmc2	0.733333	0.0370123	Gid8	0.514286	0.0200977
Dgkb	0.732394	0.0250449	Mms19	0.5	0.0169647
Arpc1a	0.732143	0.015351	Tra2b	0.5	0.0169647
Suclg1	0.727891	0.00619859	Scrn3	0.5	0.0222039
Nap1l1	0.724138	0.0228787	Cacnb3	0.5	0.0498253
Hsp90aa1	0.719821	0.0336089	Acss2	0.428571	0.0161301
Rph3a	0.715328	0.047485	Hid1	0.428571	0.0161301
Nmral1	0.714286	0.0254636	Synj2bp	0.416667	9.33727e-05
Dctn2	0.71223	0.00265694	Tmed7	0.416667	0.0271726
Hnrnpa3	0.708543	0.0374455	Ncln	0.375	0.00369312
Map6	0.706861	0.00213638	Ndufb3	0.333333	0.01669
Adam23	0.705645	0.0114761	Pafah1b3	0.3125	0.0186227
Atp2b2	0.704883	0.0286826	Pptc7	0.285714	0.00122492
Ppp1r9a	0.701299	0.0131095	Stxbp5l	0.2	0.0257214
Sccpdh	0.69863	0.0465431
Srsf2	0.692308	0.0192562
Vat1	0.6875	0.0287132
Dlg4	0.687225	0.00438098
Pip5k1c	0.686957	0.014958
Uchl1	0.686544	0.0181933
Rheb	0.68	0.0285092
Phgdh	0.669421	0.00790354
Hepacam	0.666667	0.0318376
Drg1	0.666667	0.0337978
Septin2	0.661538	0.00915444
Camk4	0.661017	0.0319729
Stmn1	0.65534	0.0178369
Aco1	0.647059	0.0277844
Bsg	0.646552	0.0380796
Rabl6	0.642857	0.0241657
Rpl10	0.627907	0.0318376
Vapb	0.626866	0.0285826
Eef1a1	0.624046	0.0124135
Trap1	0.62	0.0317347
Arrb1	0.619048	0.0352652
Gars1	0.612903	0.0281461
Tbcc	0.606061	0.0446292
Inf2	0.605769	0.0315021
Rnf14	0.6	0.0222039
Fn3k	0.6	0.0285092
Me2	0.6	0.0480801
Ywhag	0.598349	0.047735
Pspc1	0.597826	0.0167151
Mthfd1	0.596154	0.033855
Snx6	0.592593	0.0393387
Cops8	0.590164	0.00652613
Rps3a	0.589744	0.0201612
Surf4	0.588235	0.00149552
Aak1	0.588235	0.00807908
Gmfb	0.587302	0.0123764
Abhd16a	0.586207	0.0352652
Dync1i2	0.578947	0.0298575
Gtpbp1	0.578947	0.0497356
Gltp	0.576923	0.00202679
Ass1	0.576923	0.0250589
Rps24	0.576	0.0345583
H1-4	0.574766	0.0452861
Rpl5	0.574074	0.0128125
Snca	0.573744	0.0251095
Ptpn5	0.571429	0.00154997
Brsk2	0.5625	0.0198039
Lxn	0.5625	0.0294493
Cavin1	0.555556	0.0161301
Ppp1r12a	0.555556	0.0253952
Mccc1	0.55	0.017617
Cntnap2	0.54717	0.00624442
Rars1	0.536585	0.0429529
Rnmt	0.533333	0.0176483
Pip4k2b	0.530303	0.0235761
Chordc1	0.528846	0.044079
Fam169a	0.518519	0.0196827
Dgke	0.517241	0.0202619
Lmna	0.513274	0.0203001
Qars1	0.5	0.0220701
Fam114a2	0.5	0.0257214
Rpl19	0.5	0.0269522
Ptgds	0.5	0.0302015
Stk39	0.5	0.0438246
Tmem132b	0.48	0.0210982
Fam171a2	0.473684	0.030766
Shank2	0.470588	0.00476225
Coro1b	0.469388	0.025424
Mapre1	0.469136	0.000295563
Fbxo41	0.457143	0.0196748
Tjp1	0.457143	0.034564
Rin1	0.454545	0.0399685
Rpl36	0.45	0.0329352
Stx7	0.444444	0.0212086
Raly	0.444444	0.00245234
Sik3	0.441176	0.00565548
Coa3	0.4375	0.0303487
Sorbs2	0.423077	0.0113544
Plcl2	0.416667	0.00149552
Aldh18a1	0.416667	0.0376022
Stxbp1	0.416667	0.00456336
Nae1	0.416667	0.0232372
Iqsec2	0.405844	0.0331113
Tpm1	0.395349	0.0401899
Psmd9	0.392157	0.0390325
Camkk1	0.357143	0.000433929
Immt	0.356835	0.0143286
Katnal1	0.347826	0.016011
Vmp1	0.333333	0.0269522
Tkfc	0.333333	0.0498253
ATP5IF1	0.326531	0.000499487
Tnks1bp1	0.3125	0.00465327
Ccdc177	0.25	0.0157798
Arfgef1	0.214286	0.0389255
Kif1a	0.0625	0.00209001

## Sheet: 5X sort
					16	17	18	19	20	4	5	7	12	15	1	2	9	11	13
					NCAR-Veh	NCAR-Veh	NCAR-Veh	NCAR-Veh	NCAR-Veh	Hemi-Veh	Hemi-Veh	Hemi-Veh	Hemi-Veh	Hemi-Veh	Hemi-Mabuterol	Hemi-Mabuterol	Hemi-Mabuterol	Hemi-Mabuterol	Hemi-Mabuterol
Rank_Number	Protein_Name	Protein	name	GN	Out20211012_NSaw_Shamloo_11859_16_211020	Out20211012_NSaw_Shamloo_11859_17_211021	Out20211012_NSaw_Shamloo_11859_18_211021	Out20211012_NSaw_Shamloo_11859_19_211020	Out20211012_NSaw_Shamloo_11859_20_211020	Out20211012_NSaw_Shamloo_11859_4_211021	Out20211012_NSaw_Shamloo_11859_5_211020	Out20211012_NSaw_Shamloo_11859_7_211020	Out20211012_NSaw_Shamloo_11859_12_211021	Out20211012_NSaw_Shamloo_11859_15_211020	Out20211012_NSaw_Shamloo_11859_1_211020	Out20211012_NSaw_Shamloo_11859_2_211020	Out20211012_NSaw_Shamloo_11859_9_211020	Out20211012_NSaw_Shamloo_11859_11_211020	Out20211012_NSaw_Shamloo_11859_13_211020	fold change 5X/NCAR	ttest 5X	GN	log2 fold change	log10 pvalue	wt veh	hemi veh	hemi mab	hemi prop	TOTAL	5X-NCAR instances	Contaminant	Max	Sum	AAs					Hemi-Mabuterol
2452	>sp|Q5DQR4|STB5L_MOUSE Syntaxin-binding protein 5-like OS=Mus musculus OX=10090 GN=Stxbp5l PE=1 SV=1	Q5DQR4	STB5L_MOUSE Syntaxin-binding protein 5-like OS	Stxbp5l	1	1	NaN	2	NaN	3	NaN	NaN	5	7	1	NaN	NaN	1	1	3.75	0.0379966	Stxbp5l	1.90689	1.42026	3	3	3	0	9	6	0	7	30	1185
3071	>sp|Q61205|PA1B3_MOUSE Platelet-activating factor acetylhydrolase IB subunit gamma OS=Mus musculus OX=10090 GN=Pafah1b3 PE=1 SV=1	Q61205	PA1B3_MOUSE Platelet-activating factor acetylhydrolase IB subunit gamma OS	Pafah1b3	1	2	1	1	2	NaN	NaN	NaN	5	3	2	1	1	1	NaN	2.85714	0.0115892	Pafah1b3	1.51457	1.93595	5	2	4	0	11	7	0	5	25	232
3427	>sp|O54916|REPS1_MOUSE RalBP1-associated Eps domain-containing protein 1 OS=Mus musculus OX=10090 GN=Reps1 PE=1 SV=2	O54916	REPS1_MOUSE RalBP1-associated Eps domain-containing protein 1 OS	Reps1	1	NaN	2	1	1	3	NaN	4	NaN	NaN	2	3	2	NaN	1	2.8	0.00967895	Reps1	1.48543	2.01417	4	2	4	0	10	6	0	4	26	795
3382	>sp|Q8R0H9|GGA1_MOUSE ADP-ribosylation factor-binding protein GGA1 OS=Mus musculus OX=10090 GN=Gga1 PE=1 SV=1	Q8R0H9	GGA1_MOUSE ADP-ribosylation factor-binding protein GGA1 OS	Gga1	1	1	NaN	NaN	1	3	3	4	1	3	2	2	3	NaN	NaN	2.8	0.0330425	Gga1	1.48543	1.48093	3	5	3	0	11	8	0	4	30	635
2120	>sp|Q9WUA2|SYFB_MOUSE Phenylalanine--tRNA ligase beta subunit OS=Mus musculus OX=10090 GN=Farsb PE=1 SV=2	Q9WUA2	SYFB_MOUSE Phenylalanine--tRNA ligase beta subunit OS	Farsb	2	3	3	3	2	8	5	6	8	NaN	3	5	6	3	5	2.59615	0.000660116	Farsb	1.37638	3.18038	5	4	5	0	14	9	0	8	83	589
815	>sp|P12023|A4_MOUSE Amyloid-beta A4 protein OS=Mus musculus OX=10090 GN=App PE=1 SV=3	P12023	A4_MOUSE Amyloid-beta A4 protein OS	App	8	NaN	8	7	6	NaN	19	15	NaN	20	13	NaN	NaN	17	21	2.48276	0.00059297	App	1.31194	3.22697	4	3	3	0	10	7	0	21	220	770
2095	>sp|Q9R1T2|SAE1_MOUSE SUMO-activating enzyme subunit 1 OS=Mus musculus OX=10090 GN=Sae1 PE=1 SV=1	Q9R1T2	SAE1_MOUSE SUMO-activating enzyme subunit 1 OS	Sae1	2	5	2	1	3	6	8	5	8	5	2	5	4	7	4	2.46154	0.00416666	Sae1	1.29956	2.38021	5	5	5	0	15	10	0	8	91	350
3362	>sp|P61514|RL37A_MOUSE 60S ribosomal protein L37a OS=Mus musculus OX=10090 GN=Rpl37a PE=1 SV=2	P61514	RL37A_MOUSE 60S ribosomal protein L37a OS	Rpl37a	NaN	1	1	1	2	NaN	3	4	2	NaN	4	1	1	NaN	3	2.4	0.0271726	Rpl37a	1.26303	1.56587	4	3	4	0	11	7	0	4	31	92
2697	>sp|A2AP18|PLCH2_MOUSE 1-phosphatidylinositol 4,5-bisphosphate phosphodiesterase eta-2 OS=Mus musculus OX=10090 GN=Plch2 PE=1 SV=2	A2AP18	PLCH2_MOUSE 1-phosphatidylinositol 4,5-bisphosphate phosphodiesterase eta-2 OS	Plch2	NaN	3	2	NaN	2	NaN	NaN	5	6	NaN	NaN	3	NaN	3	NaN	2.35714	0.0114624	Plch2	1.23704	1.94072	3	2	2	0	7	5	0	6	40	1501
3279	>sp|Q9CPX6|ATG3_MOUSE Ubiquitin-like-conjugating enzyme ATG3 OS=Mus musculus OX=10090 GN=Atg3 PE=1 SV=1	Q9CPX6	ATG3_MOUSE Ubiquitin-like-conjugating enzyme ATG3 OS	Atg3	1	1	3	1	2	4	NaN	4	NaN	3	3	3	3	3	2	2.29167	0.0124405	Atg3	1.1964	1.90516	5	3	5	0	13	8	0	4	43	314
1642	>tr|A0A5F8MP96|A0A5F8MP96_MOUSE Septin-4 OS=Mus musculus OX=10090 GN=Septin4 PE=1 SV=1	A0A5F8MP96	A0A5F8MP96_MOUSE Septin-4 OS	Septin4	3	NaN	NaN	NaN	4	NaN	7	7	NaN	10	11	NaN	NaN	NaN	2	2.28571	0.0440936	Septin4	1.19265	1.35562	2	3	2	0	7	5	0	11	55	971
3827	>sp|Q99KP3|CRYL1_MOUSE Lambda-crystallin homolog OS=Mus musculus OX=10090 GN=Cryl1 PE=1 SV=3	Q99KP3	CRYL1_MOUSE Lambda-crystallin homolog OS	Cryl1	1	NaN	NaN	NaN	1	NaN	2	2	3	2	2	1	2	1	1	2.25	0.0290154	Cryl1	1.16993	1.53737	2	4	5	0	11	6	0	3	27	319
3319	>sp|Q78IK4|MIC27_MOUSE MICOS complex subunit Mic27 OS=Mus musculus OX=10090 GN=Apool PE=1 SV=1	Q78IK4	MIC27_MOUSE MICOS complex subunit Mic27 OS	Apool	2	1	1	NaN	1	3	2	4	NaN	2	4	3	1	2	NaN	2.2	0.0321045	Apool	1.1375	1.49343	4	4	4	0	12	8	0	4	36	265
1902	>sp|Q9D710|TMX2_MOUSE Thioredoxin-related transmembrane protein 2 OS=Mus musculus OX=10090 GN=Tmx2 PE=1 SV=1	Q9D710	TMX2_MOUSE Thioredoxin-related transmembrane protein 2 OS	Tmx2	3	NaN	1	3	5	6	7	7	8	5	4	4	9	5	4	2.2	0.00583819	Tmx2	1.1375	2.23372	4	5	5	0	14	9	0	9	99	295
2700	>sp|Q9WUA6|AKT3_MOUSE RAC-gamma serine/threonine-protein kinase OS=Mus musculus OX=10090 GN=Akt3 PE=1 SV=1	Q9WUA6	AKT3_MOUSE RAC-gamma serine/threonine-protein kinase OS	Akt3	2	1	2	2	1	NaN	3	NaN	NaN	4	2	1	3	3	6	2.1875	0.0114713	Akt3	1.12928	1.94039	5	2	5	0	12	7	0	6	40	479
2317	>sp|Q61387|COX7R_MOUSE Cytochrome c oxidase subunit 7A-related protein, mitochondrial OS=Mus musculus OX=10090 GN=Cox7a2l PE=1 SV=1	Q61387	COX7R_MOUSE Cytochrome c oxidase subunit 7A-related protein, mitochondrial OS	Cox7a2l	3	5	2	NaN	1	6	7	NaN	6	5	6	6	1	2	5	2.18182	0.0139069	Cox7a2l	1.12553	1.85677	4	4	5	0	13	8	0	7	79	111
3776	>sp|Q9D6K5|SYJ2B_MOUSE Synaptojanin-2-binding protein OS=Mus musculus OX=10090 GN=Synj2bp PE=1 SV=1	Q9D6K5	SYJ2B_MOUSE Synaptojanin-2-binding protein OS	Synj2bp	2	1	2	1	1	3	3	3	3	3	1	NaN	2	1	1	2.14286	0.000181882	Synj2bp	1.09954	3.74021	5	5	4	0	14	10	0	3	39	145
2942	>sp|Q99JG2|G37L1_MOUSE G-protein coupled receptor 37-like 1 OS=Mus musculus OX=10090 GN=Gpr37l1 PE=1 SV=2	Q99JG2	G37L1_MOUSE G-protein coupled receptor 37-like 1 OS	Gpr37l1	1	1	2	2	1	NaN	3	3	3	3	NaN	NaN	4	2	5	2.14286	0.000690812	Gpr37l1	1.09954	3.16064	5	4	3	0	12	9	0	5	43	481
2677	>sp|Q9D4H1|EXOC2_MOUSE Exocyst complex component 2 OS=Mus musculus OX=10090 GN=Exoc2 PE=1 SV=1	Q9D4H1	EXOC2_MOUSE Exocyst complex component 2 OS	Exoc2	NaN	3	2	2	1	NaN	3	4	4	5	3	2	6	4	3	2	0.0134	Exoc2	1	1.8729	4	4	5	0	13	8	0	6	45	924
2597	>sp|P70663|SPRL1_MOUSE SPARC-like protein 1 OS=Mus musculus OX=10090 GN=Sparcl1 PE=1 SV=3	P70663	SPRL1_MOUSE SPARC-like protein 1 OS	Sparcl1	2	4	2	1	2	3	4	4	6	5	4	4	4	NaN	2	2	0.0144178	Sparcl1	1	1.8411	5	5	4	0	14	10	0	6	61	650
2457	>sp|Q9DBH5|LMAN2_MOUSE Vesicular integral-membrane protein VIP36 OS=Mus musculus OX=10090 GN=Lman2 PE=1 SV=2	Q9DBH5	LMAN2_MOUSE Vesicular integral-membrane protein VIP36 OS	Lman2	2	1	NaN	NaN	2	NaN	NaN	3	3	4	7	NaN	NaN	1	3	2	0.0241101	Lman2	1	1.6178	3	3	3	0	9	6	0	7	29	358
2149	>sp|P63213|GBG2_MOUSE Guanine nucleotide-binding protein G(I)/G(S)/G(O) subunit gamma-2 OS=Mus musculus OX=10090 GN=Gng2 PE=1 SV=2	P63213	GBG2_MOUSE Guanine nucleotide-binding protein G(I)/G(S)/G(O) subunit gamma-2 OS	Gng2	1	1	3	3	3	6	5	3	2	6	3	4	1	8	5	2	0.0489956	Gng2	1	1.30984	5	5	5	0	15	10	0	8	69	71
293	>sp|P08226|APOE_MOUSE Apolipoprotein E OS=Mus musculus OX=10090 GN=Apoe PE=1 SV=2	P08226	APOE_MOUSE Apolipoprotein E OS	Apoe	11	19	10	24	14	30	27	19	44	35	25	21	25	33	51	1.98718	0.0139501	Apoe	0.990722	1.85542	5	5	5	0	15	10	0	51	540	311
125	>sp|P03995|GFAP_MOUSE Glial fibrillary acidic protein OS=Mus musculus OX=10090 GN=Gfap PE=1 SV=4	P03995	GFAP_MOUSE Glial fibrillary acidic protein OS	Gfap	40	29	29	24	36	71	NaN	52	65	55	77	57	71	58	77	1.92247	0.000668693	Gfap	0.94296	3.17477	5	4	5	0	14	9	0	99	1128	430
2577	>sp|Q91WK2|EIF3H_MOUSE Eukaryotic translation initiation factor 3 subunit H OS=Mus musculus OX=10090 GN=Eif3h PE=1 SV=1	Q91WK2	EIF3H_MOUSE Eukaryotic translation initiation factor 3 subunit H OS	Eif3h	2	3	2	3	2	5	4	6	3	5	4	4	3	4	1	1.91667	0.00461517	Eif3h	0.938599	2.33581	5	5	5	0	15	10	0	6	68	352
1805	>tr|Q91VK2|Q91VK2_MOUSE Eef1d protein OS=Mus musculus OX=10090 GN=Eef1d PE=1 SV=1	Q91VK2	Q91VK2_MOUSE Eef1d protein OS	Eef1d	5	NaN	5	NaN	NaN	NaN	NaN	10	NaN	9	9	NaN	7	9	NaN	1.9	0.0121217	Eef1d	0.925999	1.91644	2	2	3	0	7	4	0	10	62	276
1881	>sp|O55029|COPB2_MOUSE Coatomer subunit beta' OS=Mus musculus OX=10090 GN=Copb2 PE=1 SV=2	O55029	COPB2_MOUSE Coatomer subunit beta' OS	Copb2	3	3	2	3	6	3	8	5	7	9	3	9	6	5	6	1.88235	0.0461723	Copb2	0.912537	1.33562	5	5	5	0	15	10	0	9	108	905
2371	>sp|P62838|UB2D2_MOUSE Ubiquitin-conjugating enzyme E2 D2 OS=Mus musculus OX=10090 GN=Ube2d2 PE=1 SV=1	P62838	UB2D2_MOUSE Ubiquitin-conjugating enzyme E2 D2 OS	Ube2d2	2	NaN	2	NaN	NaN	NaN	4	3	4	4	4	1	4	3	3	1.875	0.00954199	Ube2d2	0.906891	2.02036	2	4	5	0	11	6	0	7	61	147
3025	>sp|Q9D071|MMS19_MOUSE MMS19 nucleotide excision repair protein homolog OS=Mus musculus OX=10090 GN=Mms19 PE=1 SV=1	Q9D071	MMS19_MOUSE MMS19 nucleotide excision repair protein homolog OS	Mms19	2	1	NaN	1	NaN	NaN	2	3	3	2	NaN	2	1	1	1	1.875	0.0456591	Mms19	0.906891	1.34047	3	4	4	0	11	7	0	5	33	1031
2898	>sp|Q62186|SSRD_MOUSE Translocon-associated protein subunit delta OS=Mus musculus OX=10090 GN=Ssr4 PE=1 SV=1	Q62186	SSRD_MOUSE Translocon-associated protein subunit delta OS	Ssr4	1	1	2	1	3	2	4	4	3	2	3	3	2	5	3	1.875	0.0479117	Ssr4	0.906891	1.31956	5	5	5	0	15	10	0	5	48	172
2610	>sp|Q8K4Z5|SF3A1_MOUSE Splicing factor 3A subunit 1 OS=Mus musculus OX=10090 GN=Sf3a1 PE=1 SV=1	Q8K4Z5	SF3A1_MOUSE Splicing factor 3A subunit 1 OS	Sf3a1	1	2	3	3	2	4	NaN	3	3	6	2	4	3	3	1	1.81818	0.0479448	Sf3a1	0.862496	1.31926	5	4	5	0	14	9	0	6	59	791
2370	>sp|P08030|APT_MOUSE Adenine phosphoribosyltransferase OS=Mus musculus OX=10090 GN=Aprt PE=1 SV=2	P08030	APT_MOUSE Adenine phosphoribosyltransferase OS	Aprt	3	1	1	2	1	3	3	3	3	2	4	5	2	3	5	1.75	0.0277844	Aprt	0.807355	1.5562	5	5	5	0	15	10	0	7	61	180
2637	>sp|Q9CYZ2|TPD54_MOUSE Tumor protein D54 OS=Mus musculus OX=10090 GN=Tpd52l2 PE=1 SV=1	Q9CYZ2	TPD54_MOUSE Tumor protein D54 OS	Tpd52l2	3	3	2	NaN	2	NaN	5	3	NaN	5	5	1	5	6	1	1.73333	0.0378567	Tpd52l2	0.793549	1.42186	4	3	5	0	12	7	0	6	53	220
2616	>sp|Q3TMH2|SCRN3_MOUSE Secernin-3 OS=Mus musculus OX=10090 GN=Scrn3 PE=1 SV=1	Q3TMH2	SCRN3_MOUSE Secernin-3 OS	Scrn3	3	2	2	2	3	4	6	4	4	2	2	3	1	2	2	1.66667	0.0460249	Scrn3	0.736966	1.33701	5	5	5	0	15	10	0	6	58	418
3843	>sp|P62996|TRA2B_MOUSE Transformer-2 protein homolog beta OS=Mus musculus OX=10090 GN=Tra2b PE=1 SV=1	P62996	TRA2B_MOUSE Transformer-2 protein homolog beta OS	Tra2b	1	2	2	NaN	1	3	2	3	2	NaN	1	2	NaN	1	1	1.66667	0.0498253	Tra2b	0.736966	1.30255	4	4	4	0	12	8	0	3	25	288
3276	>sp|Q3U5Q7|CMPK2_MOUSE UMP-CMP kinase 2, mitochondrial OS=Mus musculus OX=10090 GN=Cmpk2 PE=1 SV=2	Q3U5Q7	CMPK2_MOUSE UMP-CMP kinase 2, mitochondrial OS	Cmpk2	1	2	3	1	2	3	2	3	3	4	1	3	3	1	1	1.66667	0.0399685	Cmpk2	0.736966	1.39828	5	5	5	0	15	10	0	4	43	447
2299	>sp|P35282|RAB21_MOUSE Ras-related protein Rab-21 OS=Mus musculus OX=10090 GN=Rab21 PE=1 SV=4	P35282	RAB21_MOUSE Ras-related protein Rab-21 OS	Rab21	3	4	3	3	3	4	6	4	7	4	2	2	5	5	7	1.5625	0.0265099	Rab21	0.643856	1.57659	5	5	5	0	15	10	0	7	85	222
2982	>sp|O55028|BCKD_MOUSE [3-methyl-2-oxobutanoate dehydrogenase [lipoamide]] kinase, mitochondrial OS=Mus musculus OX=10090 GN=Bckdk PE=1 SV=1	O55028	BCKD_MOUSE [3-methyl-2-oxobutanoate dehydrogenase [lipoamide]] kinase, mitochondrial OS	Bckdk	4	3	NaN	3	2	NaN	NaN	4	5	5	1	NaN	NaN	1	4	1.55556	0.030515	Bckdk	0.63743	1.51549	4	3	3	0	10	7	0	5	39	412
991	>sp|Q9Z1N5|DX39B_MOUSE Spliceosome RNA helicase Ddx39b OS=Mus musculus OX=10090 GN=Ddx39b PE=1 SV=1	Q9Z1N5	DX39B_MOUSE Spliceosome RNA helicase Ddx39b OS	Ddx39b	9	11	9	8	12	17	15	16	15	12	13	15	10	15	10	1.53061	0.00160306	Ddx39b	0.614109	2.79505	5	5	5	0	15	10	0	17	247	428
2562	>sp|Q8VIM9|IRGQ_MOUSE Immunity-related GTPase family Q protein OS=Mus musculus OX=10090 GN=Irgq PE=1 SV=1	Q8VIM9	IRGQ_MOUSE Immunity-related GTPase family Q protein OS	Irgq	3	3	3	4	4	4	5	6	5	5	1	3	4	5	3	1.47059	0.00394977	Irgq	0.556393	2.40343	5	5	5	0	15	10	0	6	71	583
1852	>tr|Q91V77|Q91V77_MOUSE Protein S100 OS=Mus musculus OX=10090 GN=S100a1 PE=1 SV=1	Q91V77	Q91V77_MOUSE Protein S100 OS	S100a1	4	5	4	7	6	7	9	7	8	7	8	9	4	4	9	1.46154	0.00944233	S100a1	0.547488	2.02492	5	5	5	0	15	10	0	9	130	94
893	>sp|O35215|DOPD_MOUSE D-dopachrome decarboxylase OS=Mus musculus OX=10090 GN=Ddt PE=1 SV=3	O35215	DOPD_MOUSE D-dopachrome decarboxylase OS	Ddt	10	9	9	10	12	11	12	19	19	12	15	14	7	13	13	1.46	0.0406916	Ddt	0.545968	1.3905	5	5	5	0	15	10	0	19	255	118
2570	>sp|Q5HZI9|S2551_MOUSE Solute carrier family 25 member 51 OS=Mus musculus OX=10090 GN=Slc25a51 PE=1 SV=1	Q5HZI9	S2551_MOUSE Solute carrier family 25 member 51 OS	Slc25a51	2	3	2	2	2	4	4	3	3	2	5	6	2	3	4	1.45455	0.0461723	Slc25a51	0.540568	1.33562	5	5	5	0	15	10	0	6	69	298
1220	>sp|Q9QZ06|TOLIP_MOUSE Toll-interacting protein OS=Mus musculus OX=10090 GN=Tollip PE=1 SV=1	Q9QZ06	TOLIP_MOUSE Toll-interacting protein OS	Tollip	11	8	6	8	5	11	9	11	10	14	12	8	11	12	8	1.44737	0.0334983	Tollip	0.533432	1.47498	5	5	5	0	15	10	0	14	191	274
1728	>sp|P39053-4|DYN1_MOUSE Isoform 4 of Dynamin-1 OS=Mus musculus OX=10090 GN=Dnm1	P39053-4	DYN1_MOUSE Isoform 4 of Dynamin-1 OS	Dnm1	6	5	5	6	3	5	7	8	7	9	8	7	10	5	3	1.44	0.0337808	Dnm1	0.526069	1.47133	5	5	5	0	15	10	0	10	120	864
1235	>sp|Q3THE2|ML12B_MOUSE Myosin regulatory light chain 12B OS=Mus musculus OX=10090 GN=Myl12b PE=1 SV=2	Q3THE2	ML12B_MOUSE Myosin regulatory light chain 12B OS	Myl12b	7	5	5	8	5	7	11	10	8	7	7	11	9	14	13	1.43333	0.035512	Myl12b	0.519374	1.44962	5	5	5	0	15	10	0	14	177	172
1149	>sp|Q01405|SC23A_MOUSE Protein transport protein Sec23A OS=Mus musculus OX=10090 GN=Sec23a PE=1 SV=2	Q01405	SC23A_MOUSE Protein transport protein Sec23A OS	Sec23a	6	9	8	8	12	9	11	12	15	12	6	7	15	9	7	1.37209	0.0488032	Sec23a	0.456378	1.31155	5	5	5	0	15	10	0	15	199	765
1224	>sp|Q99LG2|TNPO2_MOUSE Transportin-2 OS=Mus musculus OX=10090 GN=Tnpo2 PE=1 SV=1	Q99LG2	TNPO2_MOUSE Transportin-2 OS	Tnpo2	9	11	5	9	7	NaN	11	12	10	12	8	8	14	10	13	1.37195	0.0422824	Tnpo2	0.456229	1.37384	5	4	5	0	14	9	0	14	188	887
2071	>sp|Q3THS6|METK2_MOUSE S-adenosylmethionine synthase isoform type-2 OS=Mus musculus OX=10090 GN=Mat2a PE=1 SV=2	Q3THS6	METK2_MOUSE S-adenosylmethionine synthase isoform type-2 OS	Mat2a	6	4	4	5	5	6	NaN	8	6	6	6	NaN	7	5	8	1.35417	0.0271395	Mat2a	0.437405	1.5664	5	4	4	0	13	9	0	8	102	395
1126	>sp|Q9JMH6|TRXR1_MOUSE Thioredoxin reductase 1, cytoplasmic OS=Mus musculus OX=10090 GN=Txnrd1 PE=1 SV=3	Q9JMH6	TRXR1_MOUSE Thioredoxin reductase 1, cytoplasmic OS	Txnrd1	13	8	10	11	7	15	11	14	12	14	9	12	10	15	14	1.34694	0.0305006	Txnrd1	0.429684	1.51569	5	5	5	0	15	10	0	15	235	613
1134	>sp|P99026|PSB4_MOUSE Proteasome subunit beta type-4 OS=Mus musculus OX=10090 GN=Psmb4 PE=1 SV=1	P99026	PSB4_MOUSE Proteasome subunit beta type-4 OS	Psmb4	8	9	9	10	8	12	11	15	10	9	13	10	13	10	9	1.29545	0.0450024	Psmb4	0.373458	1.34676	5	5	5	0	15	10	0	15	212	264
1310	>sp|Q99L43|CDS2_MOUSE Phosphatidate cytidylyltransferase 2 OS=Mus musculus OX=10090 GN=Cds2 PE=1 SV=1	Q99L43	CDS2_MOUSE Phosphatidate cytidylyltransferase 2 OS	Cds2	8	10	8	8	10	9	13	12	11	11	7	6	6	8	12	1.27273	0.0195763	Cds2	0.347923	1.70827	5	5	5	0	15	10	0	13	184	444
1060	>sp|P62334|PRS10_MOUSE 26S proteasome regulatory subunit 10B OS=Mus musculus OX=10090 GN=Psmc6 PE=1 SV=1	P62334	PRS10_MOUSE 26S proteasome regulatory subunit 10B OS	Psmc6	12	11	7	9	9	12	11	14	12	12	6	15	15	12	11	1.27083	0.0316178	Psmc6	0.345775	1.50007	5	5	5	0	15	10	0	16	235	389
399	>sp|P63318|KPCG_MOUSE Protein kinase C gamma type OS=Mus musculus OX=10090 GN=Prkcg PE=1 SV=1	P63318	KPCG_MOUSE Protein kinase C gamma type OS	Prkcg	33	38	36	37	37	31	32	32	35	36	30	32	32	36	36	0.917127	0.0493374	Prkcg	-0.124806	1.30682	5	5	5	0	15	10	0	41	686	697
321	>sp|P80314|TCPB_MOUSE T-complex protein 1 subunit beta OS=Mus musculus OX=10090 GN=Cct2 PE=1 SV=4	P80314	TCPB_MOUSE T-complex protein 1 subunit beta OS	Cct2	33	35	34	41	39	32	30	33	33	34	30	31	34	38	35	0.89011	0.0444092	Cct2	-0.167945	1.35253	5	5	5	0	15	10	0	48	713	535
341	>sp|Q9QYX7|PCLO_MOUSE Protein piccolo OS=Mus musculus OX=10090 GN=Pclo PE=1 SV=4	Q9QYX7	PCLO_MOUSE Protein piccolo OS	Pclo	39	42	42	46	44	37	33	38	36	43	28	32	33	42	31	0.877934	0.0319377	Pclo	-0.187815	1.4957	5	5	5	0	15	10	0	46	747	5068
566	>sp|P23506|PIMT_MOUSE Protein-L-isoaspartate(D-aspartate) O-methyltransferase OS=Mus musculus OX=10090 GN=Pcmt1 PE=1 SV=3	P23506	PIMT_MOUSE Protein-L-isoaspartate(D-aspartate) O-methyltransferase OS	Pcmt1	26	24	26	23	23	24	23	22	18	20	22	NaN	18	21	20	0.877049	0.0461723	Pcmt1	-0.18927	1.33562	5	5	4	0	14	10	0	30	422	227
545	>sp|Q9JKK7|TMOD2_MOUSE Tropomodulin-2 OS=Mus musculus OX=10090 GN=Tmod2 PE=1 SV=2	Q9JKK7	TMOD2_MOUSE Tropomodulin-2 OS	Tmod2	25	28	27	31	26	26	25	25	22	20	31	25	29	28	25	0.861314	0.0372413	Tmod2	-0.215389	1.42898	5	5	5	0	15	10	0	31	535	351
105	>sp|O08749|DLDH_MOUSE Dihydrolipoyl dehydrogenase, mitochondrial OS=Mus musculus OX=10090 GN=Dld PE=1 SV=2	O08749	DLDH_MOUSE Dihydrolipoyl dehydrogenase, mitochondrial OS	Dld	101	99	114	107	109	76	92	85	87	107	96	83	99	107	95	0.843396	0.0208367	Dld	-0.245718	1.68117	5	5	5	0	15	10	0	114	1870	509
30	>sp|P20357|MTAP2_MOUSE Microtubule-associated protein 2 OS=Mus musculus OX=10090 GN=Map2 PE=1 SV=2	P20357	MTAP2_MOUSE Microtubule-associated protein 2 OS	Map2	NaN	221	230	248	NaN	186	NaN	213	173	213	195	209	263	247	216	0.842275	0.0426445	Map2	-0.247637	1.37014	3	4	5	0	12	7	0	263	3317	1828
342	>sp|Q8BMS1|ECHA_MOUSE Trifunctional enzyme subunit alpha, mitochondrial OS=Mus musculus OX=10090 GN=Hadha PE=1 SV=1	Q8BMS1	ECHA_MOUSE Trifunctional enzyme subunit alpha, mitochondrial OS	Hadha	37	43	43	46	39	32	34	39	30	40	28	40	40	39	37	0.841346	0.0307903	Hadha	-0.249229	1.51159	5	5	5	0	15	10	0	46	740	763
71	>sp|P14873|MAP1B_MOUSE Microtubule-associated protein 1B OS=Mus musculus OX=10090 GN=Map1b PE=1 SV=2	P14873	MAP1B_MOUSE Microtubule-associated protein 1B OS	Map1b	117	113	141	150	138	99	110	119	106	112	90	120	143	113	147	0.828528	0.0210301	Map1b	-0.271378	1.67716	5	5	5	0	15	10	0	150	2451	2464
315	>tr|B1AQX9|B1AQX9_MOUSE SRC kinase-signaling inhibitor 1 OS=Mus musculus OX=10090 GN=Srcin1 PE=1 SV=1	B1AQX9	B1AQX9_MOUSE SRC kinase-signaling inhibitor 1 OS	Srcin1	36	49	42	NaN	47	37	37	NaN	35	35	NaN	NaN	36	36	42	0.827586	0.0443515	Srcin1	-0.273018	1.35309	4	4	3	0	11	8	0	49	594	1217
16	>sp|O88935|SYN1_MOUSE Synapsin-1 OS=Mus musculus OX=10090 GN=Syn1 PE=1 SV=2	O88935	SYN1_MOUSE Synapsin-1 OS	Syn1	393	362	396	418	358	262	333	330	327	338	297	345	357	385	339	0.825117	0.00575677	Syn1	-0.27733	2.23982	5	5	5	0	15	10	0	418	7080	706					NCAR-Veh
11	>tr|A3KGU7|A3KGU7_MOUSE Spectrin alpha chain, non-erythrocytic 1 OS=Mus musculus OX=10090 GN=Sptan1 PE=1 SV=1	A3KGU7	A3KGU7_MOUSE Spectrin alpha chain, non-erythrocytic 1 OS	Sptan1	486	501	534	542	513	350	363	472	420	518	425	434	489	466	432	0.824146	0.0269798	Sptan1	-0.279028	1.56896	5	5	5	0	15	10	0	542	9404	2477					Hemi-Mabuterol
277	>sp|P40124|CAP1_MOUSE Adenylyl cyclase-associated protein 1 OS=Mus musculus OX=10090 GN=Cap1 PE=1 SV=4	P40124	CAP1_MOUSE Adenylyl cyclase-associated protein 1 OS	Cap1	53	44	43	45	43	40	31	34	40	42	42	39	43	48	53	0.820175	0.0194771	Cap1	-0.285996	1.71048	5	5	5	0	15	10	0	53	853	474
[truncated: 3,879 more rows]

## Sheet: 5X cluster
	VMP1	ATG3	AKT3	NAE1	APP	COX7A2L	PSMD9	RPL36	RPL19	RPL37A	CRYL1	STX7	TKFC	RIN1	EXOC2	TPM1
Alzheimer's disease
autophagy
Ribosome
Coronavirus disease
Ras signaling pathway
Cardiac muscle contraction
[truncated: 4 more rows]

## Sheet: mab sort
					16	17	18	19	20	4	5	7	12	15	1	2	9	11	13
[truncated: 3,946 more rows]

[truncated: 3 more sheets: data processing procedure, text columns, mabuterol_vs_netGenes_GO]
