# Supplementary material for: Beta-2 adrenergic receptor agonism alters astrocyte phagocytic activity and has potential applications to psychiatric disease
Source: Research Square preprint supplement (doi:10.21203/rs.3.rs-2086278/v1), 2022-10-25
Supplement: Supplementary file 5 [file 4109659b5f046ad4c4010586.xlsx]

## Sheet: Mabuterol__merged_network
ADRB2	AP2B1	0.866922
ADRB2	AP2A1	0.866922
ADRB2	MC1R	0.825222
ADRB2	SH3GL2	0.865612
ADRB2	LRP2	0.863443
ADRB2	PTH1R	0.835401
ADRB2	CTTN	0.862834
ADRB2	ACTR2	0.862834
ADRB2	CGA	0.849809
ADRB2	HIP1R	0.862834
ADRB2	ADCYAP1R1	0.835401
ADRB2	CHRM2	0.863443
ADRB2	P2RY11	0.825222
ADRB2	ARPC3	0.862834
ADRB2	BIN1	0.863443
ADRB2	RAB5A	0.812939
ADRB2	TAAR1	0.835401
ADRB2	OCRL	0.861336
ADRB2	FCHO2	0.858303
ADRB2	ADORA2B	0.835401
ADRB2	GHRHR	0.835401
ADRB2	STON2	0.863443
ADRB2	FSHB	0.840768
ADRB2	VAMP3	0.863443
ADRB2	MC5R	0.825222
ADRB2	GCG	0.849809
ADRB2	SNX9	0.863443
ADRB2	PTGDR	0.825222
ADRB2	TFRC	0.863443
ADRB2	PIK3C2A	0.844129
ADRB2	GRB2	0.863443
ADRB2	GPR150	0.825222
ADRB2	NPSR1	0.835401
ADRB2	GIPR	0.835401
ADRB2	FCHO1	0.858303
ADRB2	HTR4	0.835401
ADRB2	VAMP2	0.863443
ADRB2	SCT	0.840768
ADRB2	GPR27	0.825222
ADRB2	CLTCL1	0.866143
ADRB2	VAMP8	0.863443
ADRB2	ADM2	0.840768
ADRB2	PTH2	0.840768
ADRB2	NECAP1	0.866462
ADRB2	SYT1	0.863443
ADRB2	ARPC4	0.862834
ADRB2	TRIP10	0.863443
ADRB2	GCGR	0.835401
ADRB2	AP2S1	0.866922
ADRB2	NPS	0.840768
ADRB2	GPR45	0.825222
ADRB2	DVL2	0.863443
ADRB2	HRH2	0.835401
ADRB2	RAMP1	0.842196
ADRB2	CLTB	0.866143
ADRB2	PICALM	0.863443
ADRB2	DNM2	0.862138
ADRB2	FNBP1	0.863443
ADRB2	HTR6	0.835401
ADRB2	SYNJ2	0.861336
ADRB2	CALCR	0.842196
ADRB2	GPR84	0.825222
ADRB2	STAM	0.863443
ADRB2	EPS15L1	0.863443
ADRB2	GPR15	0.825222
ADRB2	SH3KBP1	0.863443
ADRB2	GHRH	0.840768
ADRB2	ARPC5	0.862834
ADRB2	PTGIR	0.835401
ADRB2	KIAA0319	0.863443
ADRB2	rs1042714	0.99
ADRB2	CD3D	0.863443
ADRB2	GNB1	0.852646
ADRB2	SCARB2	0.863443
ADRB2	TF	0.863443
ADRB2	RXFP1	0.835401
ADRB2	CD3G	0.863443
ADRB2	AVPR2	0.865531
ADRB2	POMC	0.83332
ADRB2	ARRB1	0.865385
ADRB2	AP2M1	0.866922
ADRB2	FSHR	0.835401
ADRB2	rs1042713	0.99
ADRB2		1
ADRB2	VIPR1	0.825222
ADRB2	FZD4	0.863443
ADRB2	GLP2R	0.835401
ADRB2	RLN3	0.840768
ADRB2	CALCB	0.840768
ADRB2	LDLR	0.863443
ADRB2	RAMP2	0.842196
ADRB2	SYT2	0.863443
ADRB2	CALCRL	0.842196
ADRB2	SGIP1	0.866462
ADRB2	LDLRAP1	0.863443
ADRB2	CRHR1	0.835401
ADRB2	FNBP1L	0.863443
ADRB2	STAM2	0.863443
ADRB2	EPN2	0.863443
ADRB2	VIP	0.83332
ADRB2	ITSN1	0.866462
ADRB2	LHB	0.840768
ADRB2	VIPR2	0.825222
ADRB2	IGF2R	0.863443
ADRB2	PTGER2	0.825222
ADRB2	GPR20	0.825222
ADRB2	GPHB5	0.840768
ADRB2	EGF	0.863443
ADRB2	AGFG1	0.863443
ADRB2	GPR83	0.825222
ADRB2	ADCYAP1	0.840768
ADRB2	LHCGR	0.835401
ADRB2	CRH	0.840768
ADRB2	TSHR	0.835401
ADRB2	GPR176	0.825222
ADRB2	GRK6	0.808612
ADRB2	WASL	0.862834
ADRB2	AP2A2	0.866922
ADRB2	GPHA2	0.840768
ADRB2	DRD5	0.835401
ADRB2	PTH	0.840768
ADRB2	ACTR3	0.862834
ADRB2	CLTC	0.866409
ADRB2	UBA52	0.863443
ADRB2	INSL3	0.840768
ADRB2	TGOLN2	0.863443
GNAS	rs62205366	0.846398
ADRB2	REPS1	0.866462
ADRB2	RXFP2	0.835401
ADRB2	rs1042718	0.99
ADRB2	WNT5A	0.863443
ADRB2	ARRB2	0.865385
ADRB2	HGS	0.863443
ADRB2	SYT9	0.863443
ADRB2	CALCA	0.840768
ADRB2	CD4	0.863443
ADRB2	CLTA	0.866409
ADRB2	EPN1	0.863443
ADRB2	GPR32	0.825222
ADRB2	GIP	0.840768
ADRB2	GPR25	0.825222
ADRB2	PACSIN2	0.863443
ADRB2	MC2R	0.825222
ADRB2	AVP	0.865777
ADRB2	SCTR	0.835401
ADRB2	RAMP3	0.842196
ADRB2	MC3R	0.825222
ADRB2	UBB	0.863443
ADRB2	AAK1	0.866307
ADRB2	SYNJ1	0.861336
ADRB2	RPS27A	0.863443
ADRB2	ADRB2	0.866075
ADRB2	ADM	0.840768
ADRB2	GAK	0.851138
ADRB2	ARPC2	0.862834
ADRB2	HIP1	0.862834
ADRB2	CBL	0.863443
ADRB2	GRK3	0.808612
ADRB2	UBC	0.863443
ADRB2	PTHLH	0.840768
ADRB2	HTR7	0.835401
ADRB2	REPS2	0.863443
ADRB2	GPBAR1	0.835401
ADRB2	PTGER4	0.825222
ADRB2	ADRB3	0.835401
ADRB2	APOB	0.863443
ADRB2	RLN2	0.845981
ADRB2	M6PR	0.863443
ADRB2	DNAJC6	0.851138
ADRB2	GNAS	0.854948
ADRB2	EGFR	0.863443
ADRB2	SLC2A8	0.863443
ADRB2	SLC18A3	0.863443
ADRB2	VAMP7	0.863443
ADRB2	ARPC1A	0.862834
ADRB2	DAB2	0.863981
ADRB2	PTH2R	0.835401
ADRB2	AMPH	0.863443
ADRB2	TSHB	0.840768
ADRB2	ADRB1	0.835401
ADRB2	IAPP	0.840768
ADRB2	VAMP4	0.863443
ADRB2	GNG2	0.852646
ADRB2	EPS15	0.866702

## Sheet: Mabuterol_phenotype_association
rank	phenotype	cui	assoc in neigh	assoc in intom	probability	Benjamini-Hochberg	genes
108	Acth-Independent Macronodular Adrenal Hyperplasia	C1857451	9	40	1.92231e-11	2.81617e-05	AVP,FZD4,GIP,GIPR,GNAS,GPBAR1,HTR4,MC2R,POMC
109	Alzheimer Disease	C0002395	42	1699	2.71527e-11	2.84224e-05	ADRB1,ADRB2,ADRB3,AP2A2,APOB,ARRB2,BIN1,CALCR,CHRM2,CRH,DAB2,DNM2,DRD5,EGFR,FSHR,GHRH,GHRHR,GRB2,HTR6,IAPP,IGF2R,ITSN1,LDLR,LHB,LHCGR,LRP2,M6PR,NPS,PICALM,PTGDR,PTGER2,PTGER4,PTGIR,PTH,PTH1R,SH3GL2,SLC18A3,SYNJ1,SYT1,TF,UBB,VAMP2
110	Bipolar affective disorder	C0005586	27	817	2.99449e-11	2.86832e-05	ADCYAP1,ADCYAP1R1,ADM,ADRB2,APOB,AVP,CALCA,CHRM2,CRH,CRHR1,DRD5,GHRH,HIP1R,HTR4,HTR7,KIAA0319,MC2R,MC5R,POMC,RPS27A,SYNJ1,TSHB,UBC,VAMP2,VAMP3,VAMP7,VIP
111	Neuroendocrine neoplasm	C0206754	16	252	3.52126e-11	2.89439e-05	ADCYAP1R1,CRH,EGF,EGFR,FZD4,GCG,GCGR,GHRH,GIP,GIPR,GNAS,GPBAR1,IAPP,POMC,PTH,PTHLH
113	Abnormality of the pituitary gland	C0032002	32	645	4.10091e-11	2.94654e-05	ADCYAP1,ADCYAP1R1,ADM,APOB,AVP,AVPR2,CALCA,CRH,CRHR1,EGF,EGFR,FSHB,FSHR,GCG,GHRH,GHRHR,GNAS,INSL3,LDLR,LHB,LHCGR,MC2R,POMC,PTH,PTHLH,SCT,TSHB,TSHR,VAMP7,VIP,VIPR1,VIPR2
114	Pituitary adenoma	C0032000	16	286	4.56001e-11	2.97262e-05	ARRB1,ARRB2,CGA,CRH,CRHR1,EGF,EGFR,FSHB,FSHR,GHRH,GHRHR,GNAS,GRB2,MC2R,POMC,TFRC
115	Neoplasm of the adrenal gland	C0001624	12	111	4.74156e-11	2.9987e-05	ADM2,AVPR2,CGA,CRH,FSHR,GIP,GIPR,GNAS,LHCGR,MC2R,POMC,TSHR
116	Secondary hyperparathyroidism	C0020503	15	182	6.58521e-11	3.02477e-05	CALCR,CALCRL,EGF,EGFR,GHRHR,GIP,GIPR,GNAS,GRK6,LHCGR,POMC,PTH,PTH1R,TFRC,VIPR1
117	Pheochromocytoma	C0031511	17	259	7.62499e-11	3.05085e-05	ACTR2,ADCYAP1,ADM,CALCA,CALCRL,CRH,EGF,GCG,GCGR,GNAS,HTR4,MC1R,POMC,PTH,RAMP2,SCTR,VIPR1
118	Breast-ovarian cancer, familial 1	C0006142	71	4543	8.97946e-11	3.07692e-05	ADM,ADRB1,ADRB2,ADRB3,AGFG1,AMPH,AP2A1,APOB,ARRB1,ARRB2,AVP,BIN1,CALCA,CALCR,CD3D,CD4,CGA,CLTC,CRH,CRHR1,CTTN,DAB2,DNAJC6,DNM2,DRD5,DVL2,EGF,EGFR,FNBP1L,FSHB,FSHR,GCG,GHRH,GHRHR,GNAS,GRB2,IAPP,IGF2R,KIAA0319,LDLR,LHB,LHCGR,LRP2,MC1R,MC2R,MC3R,PICALM,POMC,PTGER4,PTGIR,PTH,PTH1R,PTHLH,RAB5A,REPS2,RLN2,RPS27A,SH3GL2,SH3KBP1,SNX9,SYNJ2,SYT1,TF,TFRC,TRIP10,UBC,VAMP7,VIP,VIPR1,WASL,WNT5A
119	Migraine Disorders	C0149931	17	333	8.98431e-11	3.103e-05	ADCYAP1,ADCYAP1R1,ADRB2,CALCA,CLTA,DRD5,FSHR,GNAS,HTR4,HTR6,HTR7,LDLR,RAMP1,VIP,VIPR1,VIPR2,WASL
120	Malignant tumor of prostate	C0376358	57	2940	9.19526e-11	3.12907e-05	ACTR2,ADCYAP1,ADCYAP1R1,ADM,ARRB2,BIN1,CALCA,CALCR,CGA,CLTC,CRH,CRHR1,DAB2,DNM2,EGF,EGFR,FSHB,FSHR,FZD4,GAK,GCG,GHRH,GHRHR,GNAS,HIP1,IAPP,IGF2R,KIAA0319,LDLR,LHB,LHCGR,LRP2,M6PR,MC1R,MC2R,PACSIN2,PIK3C2A,POMC,PTGER2,PTGER4,PTH,PTHLH,RAMP1,REPS1,REPS2,RXFP1,SCARB2,SCTR,STAM2,SYT1,TF,TFRC,VAMP3,VIP,VIPR1,VIPR2,WNT5A
121	Adenomas, multiple colorectal, 608456 (3)	C0001430	28	975	1.14244e-10	3.15515e-05	ADORA2B,ARRB1,CALCA,CGA,CRH,CRHR1,DNM2,EGF,EGFR,GHRH,GHRHR,GIP,GNAS,HGS,HTR4,IGF2R,INSL3,LHCGR,MC2R,POMC,PTGER2,PTGER4,PTH,PTHLH,SCTR,TFRC,TRIP10,TSHR
122	Breast carcinoma	C0678222	66	4281	1.22334e-10	3.18123e-05	ADM,ADRB1,ADRB2,ADRB3,AGFG1,AMPH,AP2A1,APOB,ARRB1,ARRB2,AVP,BIN1,CALCA,CALCR,CD3D,CGA,CLTC,CRH,CRHR1,CTTN,DAB2,DNAJC6,DNM2,DRD5,DVL2,EGF,EGFR,FNBP1L,GCG,GHRH,GHRHR,GNAS,GRB2,IAPP,IGF2R,KIAA0319,LDLR,LHB,LHCGR,LRP2,MC1R,MC3R,POMC,PTGER4,PTGIR,PTH,PTH1R,PTHLH,RAB5A,REPS2,RLN2,RPS27A,SH3GL2,SH3KBP1,SNX9,SYNJ2,SYT1,TF,TFRC,TRIP10,UBC,VAMP7,VIP,VIPR1,WASL,WNT5A
123	Cushing's syndrome	C0010481	7	34	1.27518e-10	3.2073e-05	CRH,GIP,GIPR,GNAS,LHCGR,MC2R,POMC
124	Prostate carcinoma	C0600139	50	2734	1.30448e-10	3.23338e-05	ACTR2,ADCYAP1,ADCYAP1R1,ADM,ARRB2,BIN1,CALCA,CALCR,CGA,CLTC,CRH,CRHR1,DAB2,DNM2,EGF,EGFR,FZD4,GAK,GCG,GHRH,GHRHR,GNAS,HIP1,IAPP,IGF2R,INSL3,KIAA0319,LHCGR,LRP2,M6PR,MC1R,PTGER2,PTGER4,PTH,PTHLH,RAMP1,REPS1,REPS2,RXFP1,RXFP2,SCARB2,SCTR,SYT1,TF,TFRC,VAMP3,VIP,VIPR1,VIPR2,WNT5A
125	Kidney Failure, Chronic	C0022661	22	616	1.73398e-10	3.25945e-05	ADM,ADRB1,ADRB2,ADRB3,AP2M1,APOB,CRH,CRHR1,DAB2,EGF,GCGR,IAPP,IGF2R,LDLR,LHCGR,LRP2,POMC,PTGER4,PTH,PTH1R,PTHLH,VIPR1
126	Adrenocortical carcinoma	C0206686	12	160	1.93066e-10	3.28553e-05	ADM,EGF,EGFR,GHRHR,GIPR,HTR7,IGF2R,LHCGR,MC2R,POMC,SH3KBP1,VIP
127	Mood Disorders	C0525045	16	322	2.52313e-10	3.3116e-05	ADRB1,ADRB2,ADRB3,ARRB2,AVP,CALCA,CHRM2,CRH,CRHR1,DRD5,HIP1R,HTR4,HTR6,HTR7,TGOLN2,VAMP7
128	Medullary thyroid carcinoma	C0238462	13	201	2.86113e-10	3.33768e-05	CALCA,CALCB,CALCR,EGF,EGFR,IAPP,INSL3,POMC,PTH,RAMP1,RXFP1,RXFP2,TSHR
130	Acute-Phase Reaction	C0001349	6	26	5.59579e-10	3.38983e-05	MC1R,MC2R,MC3R,MC5R,TF,TFRC
131	Heart Failure	C0018801	24	803	7.69536e-10	3.41591e-05	ADM,ADRB1,ADRB2,ADRB3,ARRB1,ARRB2,AVP,AVPR2,BIN1,CALCR,CTTN,DNM2,EGFR,FZD4,GCG,GPBAR1,HTR4,POMC,PTH,PTHLH,RAMP2,SCARB2,SH3GL2,TFRC
132	Essential hypertension	C0085580	15	305	7.75415e-10	3.44198e-05	ADM,ADRB1,ADRB2,ADRB3,APOB,CALCA,CALCRL,DNM2,FSHR,GCGR,GNAS,LDLR,POMC,PTH,VIP
133	Asthma	C0004096	33	1454	9.00229e-10	3.46806e-05	ADCYAP1R1,ADM,ADORA2B,ADRB2,CALCA,CHRM2,CRH,CRHR1,CTTN,EGF,EGFR,FZD4,GHRH,GNAS,GNB1,GPBAR1,LDLR,NPS,NPSR1,POMC,PTGDR,PTGER2,PTGER4,PTGIR,PTH,RAB5A,RAMP1,SCARB2,SLC18A3,SNX9,SYT1,TF,VIP
134	Pseudohypoparathyroidism, Type Ia	C3494506	6	28	9.416e-10	3.49413e-05	CALCA,GHRH,GNAS,PTH,PTHLH,VIP
135	Hyperparathyroidism 4	C0020502	8	68	1.4106e-09	3.52021e-05	AP2S1,CALCA,EGFR,GNAS,OCRL,PTH,PTH1R,PTHLH
136	Hypertension	C0020538	35	1647	1.60314e-09	3.54628e-05	ADM,ADORA2B,ADRB1,ADRB2,ADRB3,APOB,AVP,AVPR2,CALCA,CALCRL,CRHR1,DNM2,EGF,EGFR,FSHR,GCG,GCGR,GNAS,GPR83,HGS,HTR4,IAPP,LDLR,LDLRAP1,LHB,LRP2,M6PR,MC2R,MC3R,POMC,PTGER4,PTH,RAMP1,RAMP2,SCARB2
142	Schizophrenia	C0036341	38	1947	3.35778e-09	3.70274e-05	ACTR2,ADCYAP1,ADCYAP1R1,ADM,ADRB3,APOB,ARRB2,AVP,CHRM2,CLTB,CRH,CRHR1,DNAJC6,DNM2,DRD5,EGF,GIPR,GNAS,GNB1,GRB2,HRH2,HTR4,HTR6,HTR7,KIAA0319,MC2R,MC5R,NPS,NPSR1,PIK3C2A,POMC,SH3GL2,STON2,TAAR1,TF,VAMP2,VIP,VIPR2
143	Alcohol dependence	C0001973	21	675	3.53563e-09	3.72881e-05	ADRB2,AP2B1,AVP,CALCA,CHRM2,CRH,CRHR1,DAB2,EGF,FSHB,GNAS,HIP1,HTR7,KIAA0319,LHB,LRP2,POMC,SGIP1,STON2,TF,TGOLN2
144	Malignant neoplasm of pancreas	C0346647	34	1625	4.03736e-09	3.75489e-05	ACTR2,ADM,ADRB2,ADRB3,AP2A1,ARPC1A,AVP,CALCRL,CBL,CLTC,CTTN,DAB2,DNM2,EGF,EGFR,GCG,GHRH,IAPP,IGF2R,KIAA0319,LRP2,PTGER4,PTH,PTHLH,RAMP3,REPS1,SCT,SCTR,SYT1,SYT9,TF,TFRC,VIP,WNT5A
145	Pain	C0030193	20	628	5.2173e-09	3.78096e-05	ADM,ADRB2,APOB,AVP,CALCA,CLTC,CLTCL1,CRH,FSHR,GNAS,HTR7,LDLR,LDLRAP1,MC1R,POMC,PTH,PTH1R,SCARB2,SLC18A3,VIP
146	Hyperplasia	C0020507	10	143	7.04353e-09	3.80704e-05	EGFR,GNAS,HTR4,INSL3,LDLR,LHCGR,POMC,PTGIR,RLN2,RLN3
147	Obesity	C0028754	40	2181	7.54992e-09	3.83312e-05	ADM,ADRB1,ADRB2,ADRB3,APOB,CALCA,CALCRL,CHRM2,CRH,CRHR1,DNAJC6,EGF,EGFR,FSHR,FZD4,GCG,GCGR,GHRH,GIP,GIPR,GNAS,GPBAR1,GPR83,IAPP,IGF2R,LDLR,LHCGR,LRP2,MC1R,MC3R,MC5R,P2RY11,PICALM,POMC,RAMP2,SGIP1,TF,TFRC,VIP,WNT5A
149	Delayed puberty	C0034012	11	186	1.0564e-08	3.88527e-05	CRH,FSHB,FSHR,GHRH,IGF2R,LHB,LHCGR,OCRL,POMC,SCARB2,VAMP7
150	Prostatic Neoplasms	C0033578	33	1606	1.06415e-08	3.91134e-05	ADCYAP1,ADCYAP1R1,ADM,ADRB2,ARRB2,BIN1,CALCA,CALCR,CBL,CGA,DAB2,EGF,EGFR,GHRH,GHRHR,GNAS,HIP1,IGF2R,LHB,LRP2,M6PR,MC2R,PTGER2,PTGER4,PTHLH,REPS2,RLN2,RPS27A,SYNJ2,VAMP8,VIP,VIPR1,WNT5A
151	Pancreatic Carcinoma	C0235974	34	1690	1.08437e-08	3.93742e-05	ACTR2,ADCYAP1,ADM,ADRB2,ADRB3,AP2A1,ARPC1A,AVP,CALCRL,CBL,CLTC,CTTN,DNM2,EGF,EGFR,FZD4,GCG,GPBAR1,IAPP,IGF2R,LRP2,POMC,PTGER4,PTH,PTHLH,RAMP3,REPS1,SCT,SCTR,SYT1,SYT9,TF,TFRC,WNT5A
152	Cholera	C0008354	8	86	1.1469e-08	3.96349e-05	APOB,EGF,EGFR,LHCGR,POMC,PTH,PTHLH,VIP
153	Neuroblastoma	C0700095	33	1612	1.16974e-08	3.98957e-05	ADCYAP1,ADCYAP1R1,ADM,ADRB2,AVP,BIN1,CALCA,CALCR,CGA,CRH,EGF,EGFR,GCG,GNAS,GRB2,HGS,ITSN1,KIAA0319,LDLR,LRP2,PTGDR,PTGER2,PTGER4,PTHLH,SCT,SYNJ1,SYT1,TFRC,TSHR,UBB,VIP,VIPR1,VIPR2
158	Diabetes mellitus type 2	C0011860	37	1972	1.57162e-08	4.11995e-05	ADCYAP1,ADM,ADORA2B,ADRB1,ADRB2,ADRB3,APOB,ARRB2,AVP,CALCA,CBL,CD4,CRHR1,EGF,EGFR,FZD4,GCG,GCGR,GIP,GIPR,GPBAR1,GPR20,GRB2,IAPP,IGF2R,LDLR,MC2R,MC3R,MC5R,PIK3C2A,POMC,PTGER4,PTH,TF,TFRC,VAMP2,VAMP3
159	Anxiety Disorders	C0003469	15	383	1.83968e-08	4.14602e-05	ADCYAP1,ADCYAP1R1,ADRB2,ARRB2,AVP,CRH,CRHR1,GHRH,GNB1,HTR6,HTR7,MC1R,NPS,NPSR1,POMC
160	Pseudohypoparathyroidism, type IB, 603233 (3)	C1864100	5	25	1.95143e-08	4.1721e-05	GHRH,GNAS,PTH,PTH1R,PTHLH
161	Animal Mammary Neoplasms	C0024667	41	2352	2.07888e-08	4.19817e-05	ADM,ADORA2B,AGFG1,AP2A1,APOB,BIN1,CD4,CGA,CRH,CRHR1,CTTN,DAB2,DNM2,EGF,EGFR,FNBP1L,GHRH,GRB2,HIP1,IGF2R,LHB,LHCGR,PTGER2,PTGER4,PTH1R,PTHLH,REPS1,REPS2,SH3GL2,SH3KBP1,SNX9,SYNJ2,SYT1,TF,TFRC,TRIP10,TSHR,VAMP8,VIP,WASL,WNT5A
162	Verotoxigenic Escherichia coli gastrointestinal tract infection	C0009450	26	1111	2.6934e-08	4.22425e-05	ADM,ADRB2,APOB,CALCA,CBL,CD4,CRH,CRHR1,CTTN,DNM2,EGFR,HRH2,IGF2R,LDLR,M6PR,POMC,PTGER2,PTGER4,PTH1R,PTHLH,SH3KBP1,SYT1,TSHR,VIP,VIPR1,WNT5A
163	Disorder of endocrine system	C0014130	7	68	2.99971e-08	4.25033e-05	CALCA,CALCR,CRH,GNAS,POMC,PTH,TSHR
164	Pituitary corticotropic cell adenoma	C1306214	6	45	3.0648e-08	4.2764e-05	CRHR1,EGFR,GHRH,GNAS,MC2R,POMC
166	Obesity, severe, 601665 (3)	C0028756	9	131	3.71698e-08	4.32855e-05	ADRB1,ADRB2,ADRB3,GNAS,LDLR,MC2R,MC3R,MC5R,POMC
172	Inflammation	C0021368	19	647	4.50143e-08	4.48501e-05	ADCYAP1,ADM,ADRB2,ADRB3,APOB,BIN1,CALCA,CHRM2,CRH,CRHR1,EGF,EGFR,POMC,PTGER2,PTGER4,TF,TFRC,TSHR,VIP
173	Liver Cirrhosis, Biliary	C0023890	23	919	4.58362e-08	4.51108e-05	ADM,ADRB1,ADRB2,ADRB3,APOB,ARRB2,AVP,EGF,EGFR,GCG,IGF2R,POMC,PTH,RAMP2,RPS27A,RXFP1,RXFP2,SCARB2,STAM,SYT1,TF,TFRC,VIPR1
174	Female infertility	C0021361	7	72	4.73952e-08	4.53716e-05	ADRB2,ADRB3,FSHB,FSHR,LHB,LHCGR,TSHR
175	Congestive heart failure	C0018802	21	782	4.82636e-08	4.56323e-05	ADM,ADM2,ADRB1,ADRB2,ADRB3,ARRB1,ARRB2,AVP,AVPR2,BIN1,CALCR,CTTN,DNM2,EGFR,FZD4,GPBAR1,HTR4,POMC,SCARB2,TF,TFRC
177	Attention deficit hyperactivity disorder	C1263846	17	527	5.01659e-08	4.61538e-05	ADRB1,ADRB2,ARRB2,CLTA,DAB2,DRD5,HTR4,KIAA0319,LHCGR,NPSR1,OCRL,POMC,PTGER4,PTHLH,SYT1,SYT2,VAMP2
178	Pituitary dependent hypercortisolism	C0221406	5	29	5.09157e-08	4.64146e-05	EGF,EGFR,GNAS,MC2R,POMC
179	Renal Insufficiency, Chronic	C0035078	14	363	6.00393e-08	4.66754e-05	ADCYAP1,ADM,ADRB2,CRH,EGF,EGFR,GHRH,LDLR,OCRL,PTH,PTH1R,PTHLH,SCARB2,SCT
180	Pseudohypoparathyroidism type 1A	C0033806	5	30	6.32485e-08	4.69361e-05	CALCA,GHRH,GNAS,PTH,PTHLH
181	Hyperalgesia	C0020429	10	177	6.42331e-08	4.71969e-05	ADM,ADRB1,AVP,CALCA,CRH,HTR7,MC1R,PTGER4,PTHLH,VIP
182	Polycystic Ovary Syndrome	C0032460	16	477	6.55459e-08	4.74576e-05	ADRB2,ADRB3,APOB,FSHB,FSHR,GHRH,GNAS,IGF2R,INSL3,LHB,LHCGR,POMC,PTH,SCT,TFRC,WNT5A
184	Anorexia nervosa 1	C0003125	8	107	7.85936e-08	4.79791e-05	ADRB3,CRH,GCG,HTR7,LDLR,LRP2,MC3R,POMC
185	Major depressive disorder	C1269683	16	489	9.35011e-08	4.82399e-05	ADCYAP1,ADCYAP1R1,ADRB1,ADRB3,AVP,CHRM2,CRH,CRHR1,EGF,EGFR,HTR4,HTR6,M6PR,MC2R,POMC,VAMP2
186	Neoplasm of the colon	C0009375	21	817	1.03219e-07	4.85007e-05	ADCYAP1,ADCYAP1R1,ADM,ADRB3,BIN1,CALCA,CTTN,EGF,EGFR,GCG,GNAS,HIP1,HRH2,POMC,PTH,PTH1R,PTHLH,SH3KBP1,SNX9,SYT1,WNT5A
187	{Unipolar depression, susceptibility to}, 608516 (3)	C0011570	17	555	1.08708e-07	4.87614e-05	ADCYAP1R1,ADRB2,AP2B1,APOB,AVP,CHRM2,CRH,CRHR1,DVL2,EGFR,FSHR,HGS,HTR4,HTR6,HTR7,POMC,TF
188	Benign melanocytic nevus	C1456781	7	80	1.09267e-07	4.90222e-05	CGA,CRH,EGF,EGFR,LRP2,MC1R,POMC
189	Rhabdomyosarcoma alveolar	C0035412	14	381	1.12506e-07	4.92829e-05	AP2A1,ARPC5,ARRB1,CLTC,CLTCL1,EGF,EGFR,IAPP,MC1R,PTH,PTHLH,SYNJ1,SYT1,TFRC
190	Mental disorders	C0004936	15	439	1.19965e-07	4.95437e-05	ADCYAP1,ADCYAP1R1,CALCA,CHRM2,CRH,CRHR1,DRD5,FZD4,GPBAR1,HTR7,KIAA0319,POMC,PTH,SCT,VIP
191	Increased analgesia from kappa-opioid receptor agonist, female-specific	C0205217	7	81	1.20476e-07	4.98044e-05	FSHR,GNAS,LDLRAP1,LHCGR,MC1R,MC2R,VAMP7
192	Tachycardia	C3827868	9	149	1.25974e-07	5.00652e-05	ADRB1,ADRB2,GCG,GNAS,HTR4,LHB,SCT,TSHR,VIP
196	Metabolic Syndrome X	C0524620	18	638	1.77284e-07	5.11082e-05	ADCYAP1,ADM,ADRB1,ADRB2,ADRB3,APOB,FSHR,GCG,GIP,GIPR,IGF2R,LDLR,LRP2,MC3R,POMC,SYT1,VIP,VIPR2
198	Diabetes Mellitus, Type 1	C0011849	36	2081	1.95197e-07	5.16297e-05	ADCYAP1,ADM,ADORA2B,ADRB1,ADRB2,ADRB3,AGFG1,APOB,AVP,CALCA,CHRM2,CRH,DNM2,EGFR,GCG,GCGR,GHRH,GHRHR,GIP,GIPR,GNAS,GPBAR1,IAPP,INSL3,LDLR,LRP2,MC3R,POMC,PTGER4,PTH,PTHLH,RAMP2,SYT1,TF,TFRC,VAMP4
199	Insulinoma	C0021670	9	157	2.05525e-07	5.18905e-05	ADCYAP1,CALCA,CRHR1,EGF,GCG,GCGR,GIP,IAPP,PTHLH
200	Carcinoid tumor no ICD-O subtype	C0334299	7	87	2.10998e-07	5.21512e-05	CALCA,EGF,EGFR,GHRH,POMC,PTH,PTHLH
201	Hyperglycemia	C0020456	15	459	2.18841e-07	5.2412e-05	ADM,ADORA2B,ADRB1,ADRB3,APOB,AVP,GCG,GCGR,GIP,GIPR,IAPP,POMC,PTH,SYT1,TFRC
203	Adrenocortical adenoma	C0206667	7	89	2.51927e-07	5.29335e-05	ADM,AVP,EGFR,GIP,GIPR,MC2R,POMC
204	Irritable bowel syndrome with diarrhea	C0022104	9	162	2.75282e-07	5.31943e-05	CRH,CRHR1,GCG,GPBAR1,HTR4,HTR7,NPSR1,POMC,VIP
205	Ovarian Neoplasms	C0919267	22	942	2.94359e-07	5.3455e-05	ACTR2,ACTR3,ADM,CALCA,CALCR,CGA,CRH,CRHR1,CTTN,DAB2,EGF,EGFR,FSHR,GHRH,GPR150,GRB2,IGF2R,INSL3,LHCGR,POMC,PTGER2,VAMP7
210	Stress, Psychological	C0038443	6	63	3.35378e-07	5.47588e-05	ADCYAP1R1,ADRB1,ADRB2,AVP,CRH,CRHR1
215	body mass	C0518010	7	94	3.85231e-07	5.60626e-05	ADRB1,ADRB2,ADRB3,CALCR,GCGR,IAPP,POMC
216	Hypercholesterolemia, autosomal dominant, type B	C0020443	10	212	3.96937e-07	5.63233e-05	ADRB2,APOB,AVP,CALCR,DAB2,LDLR,LDLRAP1,LRP2,OCRL,PICALM
217	Alcohol abuse	C0085762	7	95	4.18109e-07	5.65841e-05	AVP,CHRM2,CRHR1,EGFR,HTR7,LDLR,POMC
218	Sleep Wake Disorders	C0851578	7	95	4.18109e-07	5.68449e-05	ADRB2,ADRB3,CRH,GHRH,GHRHR,HTR7,POMC
219	Preeclampsia/eclampsia 1	C0032914	13	371	5.03088e-07	5.71056e-05	ADM,ADORA2B,ADRB2,ADRB3,APOB,CALCA,CRH,CRHR1,EGF,FSHR,IGF2R,PTGER2,PTGER4
222	Anorexia	C0003123	8	134	5.41604e-07	5.78879e-05	AVPR2,CRH,CRHR1,HTR4,IAPP,NPSR1,POMC,SCARB2
223	Abdominal obesity	C0311277	8	134	5.41604e-07	5.81486e-05	ADRB2,ADRB3,APOB,GIP,GNAS,LDLR,POMC,TFRC
224	Abnormality of skeletal maturation	C4025818	11	268	5.65294e-07	5.84094e-05	FSHB,FSHR,GHRHR,LHCGR,MC2R,POMC,PTH1R,SCARB2,TSHR,VAMP7,WNT5A
225	Premature Birth	C0151526	13	376	5.90273e-07	5.86701e-05	ADRB2,APOB,CRH,CRHR1,FZD4,IGF2R,POMC,PTGER2,PTGER4,PTH1R,RLN2,RLN3,TSHR
226	Abnormality of skeletal physiology	C4023164	14	436	6.26647e-07	5.89309e-05	FSHB,FSHR,FZD4,GHRHR,GNAS,LHCGR,MC2R,OCRL,POMC,PTH1R,SCARB2,TSHR,VAMP7,WNT5A
230	Lung Neoplasms	C0024121	24	1155	8.02895e-07	5.99739e-05	ADCYAP1,ADCYAP1R1,ADM,ADRB2,AMPH,ARRB1,AVP,CALCA,DAB2,DVL2,EGF,EGFR,EPS15,IGF2R,POMC,PTGDR,PTGER2,PTGER4,PTHLH,RAMP2,TF,TFRC,TSHR,WNT5A
231	Familial hypercholesterolemia	C0020445	9	182	8.04738e-07	6.02347e-05	ADRB1,ADRB2,ADRB3,APOB,EGF,EGFR,LDLR,LDLRAP1,POMC
232	Hyperthyroidism	C0020550	8	141	8.32062e-07	6.04954e-05	ADRB2,APOB,GNAS,LDLR,PTH,SYT1,TSHB,TSHR
233	Thyroid hormone receptor defect	C2940786	4	25	8.35626e-07	6.07562e-05	GHRH,GNAS,PTH,TSHR
234	Carcinoid tumor	C0007095	9	183	8.45996e-07	6.10169e-05	CALCA,EGF,EGFR,GHRH,POMC,PTH,PTHLH,SCT,SCTR
235	Osteoporosis	C0029456	17	642	9.06148e-07	6.12777e-05	CALCA,CALCR,CRHR1,FSHR,GHRH,GHRHR,GNAS,INSL3,LDLR,POMC,PTGER4,PTH,PTH1R,PTH2R,PTHLH,RXFP2,VAMP7
236	Chronic Fatigue Syndrome	C0015674	5	46	9.0739e-07	6.15385e-05	CRHR1,HTR4,HTR6,HTR7,POMC
237	Rheumatoid arthritis	C0003873	32	1856	1.01397e-06	6.17992e-05	ADM,ADRB2,ADRB3,AGFG1,APOB,ARRB1,CALCRL,CD3G,CD4,CGA,CLTA,CRH,CRHR1,DNAJC6,EGF,EGFR,GPR15,GRK6,LDLR,LRP2,NPSR1,PICALM,POMC,PTGER2,PTGER4,PTHLH,RAMP2,SYT1,TF,VIP,VIPR1,WNT5A
238	Congenital adrenal hyperplasia	C0001627	6	74	1.02096e-06	6.206e-05	AVPR2,CRH,GIP,HTR4,MC2R,POMC
239	Recurrent major depressive episodes	C0154409	4	26	1.02856e-06	6.23207e-05	AVP,CHRM2,CRH,CRHR1
240	Melanocytic nevus of skin	C3665593	5	47	1.03404e-06	6.25815e-05	CRH,EGF,LRP2,MC1R,POMC
241	Parkinson Disease	C0030567	19	789	1.04546e-06	6.28422e-05	AAK1,AVP,CALCA,CRHR1,DNAJC6,DRD5,EGF,GAK,GRK6,HIP1R,HTR6,IGF2R,MC1R,PICALM,POMC,SCARB2,SH3GL2,SYNJ1,TF
242	Chronic obstructive pulmonary disease	C0024117	20	865	1.10132e-06	6.3103e-05	ADM,ADORA2B,ADRB1,ADRB2,ADRB3,APOB,CALCR,CD4,CGA,CRHR1,EGF,EGFR,HTR4,IGF2R,LDLR,PTH,TF,TFRC,VIP,VIPR1
243	Osteoarthritis	C0029408	21	942	1.13819e-06	6.33638e-05	ADM,CALCA,CALCRL,CRH,CRHR1,EGF,FZD4,GNAS,GPBAR1,OCRL,PTGER2,PTGER4,PTH,PTH1R,PTH2R,PTHLH,SCARB2,SYT1,VIP,VIPR2,WNT5A
244	Ovarian Diseases	C0029928	10	236	1.14441e-06	6.36245e-05	ADRB2,ADRB3,CGA,FSHR,GNAS,GPR83,LHCGR,POMC,PTH,TFRC
245	Hypothyroidism	C0020676	12	341	1.16214e-06	6.38853e-05	ADRB2,APOB,CD4,FSHR,GHRHR,GIP,GNAS,LDLR,POMC,TF,TSHB,TSHR
246	Autism 15	C0004352	20	868	1.16364e-06	6.4146e-05	ADM,ADRB2,AVP,CALCA,CALCRL,CGA,EGF,FSHB,HIP1,HTR4,HTR6,HTR7,KIAA0319,LHB,LHCGR,POMC,SCT,TF,VIP,VIPR1
249	Hypercalciuria	C0020438	6	76	1.22541e-06	6.49283e-05	AP2S1,LRP2,OCRL,POMC,PTH,PTH1R
256	Hyperlipidemia, combined, 1	C0020473	11	293	1.44328e-06	6.67536e-05	ADM,ADRB1,ADRB2,ADRB3,APOB,FSHR,GCG,LDLR,LDLRAP1,LRP2,PTH
257	Adrenal Gland Hyperfunction	C0001622	4	28	1.519e-06	6.70143e-05	EGF,EGFR,MC2R,POMC
258	Hypercalcemia, infantile, 2	C0020437	7	114	1.68671e-06	6.72751e-05	AP2S1,CALCA,CALCR,EGFR,PTH,PTH1R,PTHLH
263	Substance addiction and disorders	C0038580	6	80	1.73842e-06	6.85789e-05	AVP,CHRM2,CRHR1,DRD5,GCG,POMC
264	Depressive Disorder	C0011581	15	543	1.99442e-06	6.88396e-05	ADCYAP1R1,ADRB2,AP2B1,AVP,CHRM2,CRH,CRHR1,DRD5,EGFR,FSHR,GNB1,HGS,HTR4,HTR7,POMC
265	Pancreatic Neoplasms	C0030297	18	750	1.99551e-06	6.91004e-05	ADM,ADRB2,ARPC1A,DAB2,DNM2,EGF,EGFR,GHRH,GNAS,IGF2R,LDLR,MC1R,PTH1R,PTHLH,SCT,SCTR,TSHR,WNT5A
266	Primary hyperparathyroidism	C0221002	5	53	2.13358e-06	6.93611e-05	ADM,AP2S1,CALCA,PTH,PTHLH
267	Bradycardia	C0428977	5	53	2.13358e-06	6.96219e-05	CHRM2,CRH,GCG,LHB,POMC
269	Diabetes insipidus	C0011848	5	55	2.66247e-06	7.01434e-05	AVP,AVPR2,OCRL,POMC,UBB
270	Gastrinoma	C0017150	4	32	3.04109e-06	7.04042e-05	EGF,EGFR,SCT,SCTR
273	Abnormality of the parathyroid physiology	C4023198	5	57	3.29359e-06	7.11864e-05	AP2S1,GNAS,OCRL,PTH,PTH1R
282	Bronchial Hyperreactivity	C0085129	8	170	3.92567e-06	7.35332e-05	ADRB2,CALCA,CRHR1,EGFR,NPSR1,PTGDR,PTGER4,VIP
283	Bone neoplasms	C0005967	6	91	4.14612e-06	7.3794e-05	CALCA,EGFR,GNAS,IGF2R,PTHLH,SYT1
284	Hypotension	C0020649	7	129	4.26533e-06	7.40548e-05	ADM,AVP,CRH,GCG,POMC,PTGER4,VIP
285	Ischemia	C0022116	16	647	4.3935e-06	7.43155e-05	ADCYAP1,ADM,ADORA2B,ADRB2,ADRB3,APOB,AVP,CALCA,CALCRL,EGF,FZD4,GPBAR1,POMC,SYT1,TF,VIP
286	Skin nodule	C0037287	6	92	4.46077e-06	7.45763e-05	APOB,GNAS,LDLR,MC1R,OCRL,PTH1R
287	Nevus	C0497388	8	174	4.74676e-06	7.4837e-05	CGA,CRH,EGF,EGFR,LRP2,MC1R,POMC,WNT5A
288	Antisocial Personality Disorder	C0003431	4	35	4.81801e-06	7.50978e-05	AVP,DRD5,HGS,POMC
289	Carcinogenesis	C0596263	49	3723	4.92105e-06	7.53585e-05	ADCYAP1,ADM,ADRB2,AP2A1,AVP,CALCA,CALCR,CBL,CLTC,CRH,CRHR1,CTTN,DAB2,DNM2,EGF,EGFR,FSHR,FZD4,GHRH,GHRHR,GNAS,GPBAR1,GRB2,HIP1,IAPP,IGF2R,INSL3,ITSN1,LDLR,LHCGR,MC1R,MC2R,POMC,PTGDR,PTGER4,PTH,PTH2,PTHLH,RAB5A,RAMP1,SH3GL2,SNX9,SYT1,TFRC,TRIP10,TSHR,VIP,VIPR1,WNT5A
290	Abnormality of the endocrine system	C4025823	19	878	5.2412e-06	7.56193e-05	AP2S1,AVP,AVPR2,FSHB,FSHR,GHRHR,GNAS,LHB,LHCGR,MC2R,OCRL,POMC,PTH,PTH1R,SCARB2,TF,TSHB,TSHR,VAMP7
291	Vascular Calcification	C0342649	5	62	5.41687e-06	7.58801e-05	APOB,GRK6,LDLR,LDLRAP1,PTH
292	Osteomalacia	C0029442	4	36	5.56277e-06	7.61408e-05	AVPR2,LRP2,OCRL,PTH
293	Sparse pubic hair	C1858573	4	36	5.56277e-06	7.64016e-05	FSHB,FSHR,LHB,VAMP7
294	Abnormality of the pubic hair	C4022288	4	36	5.56277e-06	7.66623e-05	FSHB,FSHR,LHB,VAMP7
300	Plaque, Atherosclerotic	C0011389	9	226	5.62697e-06	7.82269e-05	APOB,CALCA,GIP,IAPP,LDLR,LRP2,TF,UBB,WNT5A
301	Disorders of Intracellular Cobalamin Metabolism	C0025517	12	394	5.65155e-06	7.84876e-05	ADRB2,ADRB3,AVP,DNM2,FSHR,GCG,GIP,GNAS,GPBAR1,KIAA0319,LDLR,PTH
302	Adrenal hyperplasia	C0342492	5	63	5.95177e-06	7.87484e-05	CRH,GIP,GNAS,MC2R,POMC
303	Amyotrophic Lateral Sclerosis	C0002736	18	812	6.25835e-06	7.90091e-05	AAK1,ADCYAP1,ADRB2,ADRB3,AMPH,APOB,DNM2,EGF,EGFR,GHRHR,IGF2R,LDLR,POMC,PTGER2,RAB5A,SYT1,VIP,WNT5A
304	Abnormality of the parathyroid gland	C4025822	5	64	6.52875e-06	7.92699e-05	AP2S1,GNAS,OCRL,PTH,PTH1R
305	Secondary hypertriglyceridemia	C0027627	46	3444	6.84751e-06	7.95306e-05	ACTR2,ADM,ADRB1,ADRB2,ARRB1,ARRB2,BIN1,CALCA,CALCR,CD4,CGA,CTTN,DAB2,DNM2,EGF,EGFR,FNBP1L,FSHR,GCG,GHRHR,GNAS,GRB2,HIP1,HRH2,IAPP,IGF2R,KIAA0319,LDLR,LHCGR,MC1R,POMC,PTH,PTH1R,PTHLH,RAB5A,REPS1,RXFP1,SH3GL2,SYNJ2,SYT1,TF,TFRC,TRIP10,TSHR,VIP,WNT5A
319	Primary hyperaldosteronism	C1384514	5	65	7.15026e-06	8.31812e-05	AVP,FZD4,GPBAR1,LHCGR,POMC
320	alcohol use disorder	C0001956	4	38	7.32131e-06	8.3442e-05	AVP,CRH,CRHR1,NPSR1
321	Cystitis	C0010692	6	100	7.7689e-06	8.37027e-05	ADCYAP1,ADCYAP1R1,POMC,PTGER4,SYT1,VIP
322	Unipolar Depression	C0041696	12	406	7.79682e-06	8.39635e-05	ADRB1,ADRB3,AVP,CHRM2,CRH,CRHR1,EGF,EGFR,HTR4,HTR6,POMC,VAMP2
323	Drug Dependence	C1510472	5	66	7.81892e-06	8.42243e-05	AVP,CHRM2,CRHR1,GCG,POMC
324	Colitis, Ulcerative	C0009319	16	679	8.26935e-06	8.4485e-05	ADM,ADRB3,ARRB1,CALCA,CRHR1,EGF,EGFR,GCG,GLP2R,GPR15,HTR7,PICALM,PTGER4,SYT1,TFRC,VIP
325	Myotubular myopathy	C0175709	4	39	8.34954e-06	8.47458e-05	AMPH,BIN1,DNM2,WASL
328	Down Syndrome	C0013080	13	476	9.08857e-06	8.5528e-05	ADRB2,AMPH,CALCA,CGA,ITSN1,PICALM,RAB5A,SYNJ1,SYT1,TSHR,UBB,VIP,VIPR1
329	Abnormality of the skeletal system	C4021790	31	1961	9.10276e-06	8.57888e-05	AP2S1,APOB,AVP,BIN1,CBL,DNAJC6,DNM2,FSHB,FSHR,FZD4,GHRHR,GNAS,LDLR,LDLRAP1,LHCGR,LRP2,MC2R,OCRL,POMC,PTH,PTH1R,PTHLH,SCARB2,SYNJ1,SYT2,TF,TSHB,TSHR,UBB,VAMP7,WNT5A
330	Hyperandrogenism, nonclassic type, due to 21-hydroxylase deficiency, 201910 (3)	C0206081	5	68	9.30842e-06	8.60495e-05	ADRB3,FSHR,INSL3,LHCGR,POMC
331	Giant cell tumor of bone	C0206638	5	69	1.01349e-05	8.63103e-05	CALCA,CALCR,EGF,EGFR,PTHLH
332	Hyperinsulinemia	C0020459	11	355	1.02544e-05	8.65711e-05	ADRB2,ADRB3,APOB,GCG,GIP,LDLR,MC3R,POMC,PTH,TFRC,VAMP8
333	Rickets	C0035579	4	41	1.07427e-05	8.68318e-05	LRP2,OCRL,PTH,PTH1R
334	Acute myocardial ischemia	C0151744	13	484	1.09578e-05	8.70926e-05	ADM2,ADORA2B,ADRB1,ADRB2,ADRB3,APOB,IAPP,LDLR,POMC,RAB5A,RAMP2,RLN3,TFRC
335	Acromegaly	C0001206	5	70	1.10197e-05	8.73533e-05	ARRB1,GHRH,GHRHR,GNAS,PTH
336	Wiskott-Aldrich syndrome, 301000 (3)	C0043194	5	70	1.10197e-05	8.76141e-05	ACTR2,ACTR3,CTTN,DNM2,WASL
337	Adenocarcinoma, ovarian, somatic, 167000 (3)	C0001418	28	1700	1.11736e-05	8.78748e-05	ADM,ADORA2B,ADRB2,ARRB2,AVP,CALCA,CRHR1,CTTN,EGF,EGFR,GCG,GHRH,GHRHR,GIP,GNAS,IGF2R,PTGER2,PTGER4,PTHLH,RAMP2,SCT,SCTR,SYT1,TRIP10,UBC,VIP,VIPR1,WNT5A
342	Thyroid Neoplasms	C0040136	13	486	1.14751e-05	8.91786e-05	CALCA,EGF,EGFR,GNAS,IGF2R,INSL3,MC1R,PTH,PTH1R,RLN2,TF,TSHR,WNT5A
343	Chorioamnionitis	C0008495	8	195	1.19151e-05	8.94394e-05	ADM,ADRB2,ADRB3,APOB,CRHR1,IGF2R,PTGER2,PTGER4
344	MAJOR AFFECTIVE DISORDER 4	C1970943	5	71	1.1966e-05	8.97001e-05	CRH,DRD5,HIP1R,HTR7,VAMP7
345	MAJOR AFFECTIVE DISORDER 5	C1970944	5	71	1.1966e-05	8.99609e-05	CRH,DRD5,HIP1R,HTR7,VAMP7
346	MAJOR AFFECTIVE DISORDER 6	C1970945	5	71	1.1966e-05	9.02216e-05	CRH,DRD5,HIP1R,HTR7,VAMP7
347	Major affective disorder 7	C2700438	5	71	1.1966e-05	9.04824e-05	CRH,DRD5,HIP1R,HTR7,VAMP7
348	MAJOR AFFECTIVE DISORDER 8	C2700439	5	71	1.1966e-05	9.07432e-05	CRH,DRD5,HIP1R,HTR7,VAMP7
349	MAJOR AFFECTIVE DISORDER 9	C2700440	5	71	1.1966e-05	9.10039e-05	CRH,DRD5,HIP1R,HTR7,VAMP7
350	Obesity, Visceral	C2936179	4	42	1.2124e-05	9.12647e-05	ADRB3,APOB,FSHR,POMC
360	Weight Gain Adverse Event	C2911647	7	151	1.3596e-05	9.38722e-05	ADRB2,ADRB3,DRD5,HRH2,HTR4,HTR6,HTR7
361	Vitamin D Deficiency	C0042870	4	43	1.36402e-05	9.4133e-05	LDLR,LRP2,OCRL,PTH
362	Ovarian Failure, Premature	C0085215	8	199	1.40129e-05	9.43937e-05	FSHB,FSHR,GHRH,IGF2R,LHB,LHCGR,POMC,TSHB
363	Abnormality of the hypothalamus-pituitary axis	C4025819	9	252	1.45583e-05	9.46545e-05	AVP,FSHB,FSHR,GHRHR,GNAS,LHCGR,POMC,TSHR,VAMP7
364	Pathologic fracture	C0016663	4	44	1.53002e-05	9.49153e-05	GNAS,OCRL,PTH1R,SCARB2
365	Cardiovascular Diseases	C0007222	20	1029	1.59284e-05	9.5176e-05	ADM,ADRB1,ADRB2,ADRB3,APOB,AVP,CGA,EGF,GCG,GIP,GIPR,LDLR,MC3R,PTGER2,PTGIR,PTH,SGIP1,SH3GL2,TF,VAMP8
366	Oligospermia	C0028960	7	155	1.64393e-05	9.54368e-05	APOB,CGA,EGF,FSHB,FSHR,INSL3,LHCGR
369	Bone necrosis	C0029445	4	45	1.71135e-05	9.6219e-05	APOB,PTH,PTH1R,TF
370	Somatotroph adenoma	C0346302	4	45	1.71135e-05	9.64798e-05	GHRH,GHRHR,GNAS,POMC
371	Nicotine Dependence	C0028043	6	113	1.73383e-05	9.67405e-05	ARRB1,ARRB2,CHRM2,CRH,CRHR1,DRD5
372	Nephrocalcinosis	C0027709	5	76	1.77341e-05	9.70013e-05	LRP2,OCRL,POMC,PTH,PTH1R
373	Thyroid Diseases	C0040128	11	376	1.81446e-05	9.72621e-05	CALCA,FSHR,GNAS,INSL3,LRP2,POMC,PTGER4,TF,TGOLN2,TSHB,TSHR
374	Ichthyosis bullosa of Siemens	C0432306	5	77	1.91195e-05	9.75228e-05	CRHR1,GPBAR1,NPSR1,POMC,VIP
375	Panic disorder syndrome 1 (2)	C0030319	6	115	1.94355e-05	9.77836e-05	AVP,CRH,CRHR1,DRD5,NPS,NPSR1
376	Abnormality of divalent inorganic cation homeostasis	C4023648	6	115	1.94355e-05	9.80443e-05	AP2S1,EGF,GNAS,OCRL,PTH,PTH1R
377	Tumor Angiogenesis	C1519670	12	443	1.95919e-05	9.83051e-05	ADM,ADM2,ARRB1,CTTN,DAB2,EGF,EGFR,FZD4,GPBAR1,PTGER2,PTHLH,WNT5A
388	Hypoglycemia, neonatal, simulating foetopathia diabetica	C0020615	9	265	2.24316e-05	0.000101173	ADRB2,AGFG1,CRH,GCG,GCGR,GHRH,GHRHR,MC2R,POMC
389	Neck Neoplasms	C0027533	4	48	2.35725e-05	0.000101434	CTTN,EGFR,IAPP,MC1R
390	Bile duct cancer resectable	C0740277	4	48	2.35725e-05	0.000101695	APOB,EGFR,LDLR,SCTR
391	Abnormality of secondary sexual hair	C4024171	4	48	2.35725e-05	0.000101956	FSHB,FSHR,LHB,VAMP7
392	Substance Withdrawal Syndrome	C0038587	5	80	2.38073e-05	0.000102216	AVP,CRH,GNAS,HRH2,POMC
399	Meningioma	C0025286	12	452	2.41556e-05	0.000104042	AP2B1,CALCA,CLTCL1,CRHR1,EGF,EGFR,GCG,GNAS,GRB2,PTHLH,TFRC,VIP
400	Arteriosclerosis	C0003850	20	1059	2.4332e-05	0.000104302	ADM,ADRB1,ADRB2,APOB,EGF,EGFR,GCG,GHRHR,GIP,HGS,HRH2,LDLR,LDLRAP1,PTGIR,PTH,PTHLH,RAMP1,TFRC,VAMP8,WNT5A
401	Multiple Endocrine Neoplasia Type 1	C0025267	5	81	2.55605e-05	0.000104563	GCG,GHRH,GNAS,POMC,PTH
402	Precocious puberty	C0034013	6	120	2.56098e-05	0.000104824	GHRH,GNAS,IGF2R,LHCGR,POMC,PTH1R
403	Rous Sarcoma	C0086942	4	49	2.60999e-05	0.000105085	EGF,LDLR,RPS27A,UBC
404	Abnormality of head blood vessel	C4073244	4	49	2.60999e-05	0.000105346	APOB,FZD4,LDLR,LDLRAP1
405	Ectopic calcification	C3806226	7	166	2.69496e-05	0.000105606	AP2S1,APOB,GNAS,LDLR,LDLRAP1,PTH,PTH1R
406	Flushing	C0016382	3	25	2.84084e-05	0.000105867	AVP,PTGDR,VIP
407	Akinesia	C0085623	3	25	2.84084e-05	0.000106128	DNAJC6,DNM2,SYNJ1
408	Epilepsy	C0014544	15	673	2.88534e-05	0.000106389	ARPC2,CALCA,CHRM2,DNAJC6,HIP1,IAPP,KIAA0319,MC3R,POMC,PTH,REPS1,SCARB2,SYT1,VAMP2,WASL
414	granulosa cell tumor	C0018206	5	83	2.93787e-05	0.000107953	EGF,EGFR,FSHR,FZD4,LHCGR
415	Chronic heart failure	C0264716	5	84	3.14524e-05	0.000108214	ADM,ADM2,ADORA2B,ADRB1,ADRB2
416	Accelerated skeletal maturation	C0545053	4	51	3.17829e-05	0.000108475	LHCGR,MC2R,PTH1R,TSHR
417	Non-small cell lung carcinoma	C0007131	30	1993	3.2499e-05	0.000108735	AGFG1,ARRB1,AVP,CALCA,CALCR,CGA,DAB2,EGF,EGFR,EPS15,GHRH,GIPR,GNAS,HIP1,IAPP,IGF2R,NPS,POMC,PTGER2,PTGER4,PTHLH,RAB5A,REPS1,REPS2,SH3GL2,SYT1,TF,TRIP10,VIP,WNT5A
418	Achalasia	C0014848	3	26	3.33865e-05	0.000108996	POMC,VIP,VIPR1
419	Abnormality of phosphate homeostasis	C4022032	4	52	3.49615e-05	0.000109257	GNAS,OCRL,PTH,PTH1R
420	Mitral regurgitation	C0026266	5	88	4.09552e-05	0.000109518	ADRB2,APOB,CBL,LDLR,LDLRAP1
426	Thyroid cancer, follicular	C0206682	7	177	4.25866e-05	0.000111082	CGA,DNAJC6,EGF,EGFR,MC1R,RXFP1,TSHR
427	Multiple Endocrine Neoplasia Type 2b	C0025269	3	28	4.52172e-05	0.000111343	CALCA,EGF,EGFR
428	Malignant tumor of urinary bladder	C0005684	23	1371	4.63375e-05	0.000111604	ADM,AGFG1,APOB,CALCR,CD4,CGA,CTTN,DAB2,EGF,EGFR,FZD4,GNAS,GRB2,IAPP,IGF2R,LDLR,PTH,REPS1,RPS27A,SYT1,TFRC,UBC,WNT5A
429	Musculoskeletal Diseases	C0026857	6	132	4.72189e-05	0.000111864	ADRB2,CRH,CRHR1,POMC,PTGER2,TSHR
430	Cataracts, growth hormone deficiency, sensory neuropathy, sensorineural hearing loss, and skeletal dysplasia	C0271561	5	91	4.94907e-05	0.000112125	APOB,GHRH,GHRHR,GNAS,POMC
431	Pregnancy Complications, Hematologic	C0032964	6	133	4.95449e-05	0.000112386	ADRB2,CRH,CRHR1,POMC,PTGER2,TSHR
432	Abnormality of the anterior pituitary	C4023206	7	181	4.98857e-05	0.000112647	FSHB,FSHR,GHRHR,GNAS,LHCGR,POMC,VAMP7
433	Multiple endocrine neoplasia, type 4	C0027662	4	56	5.02117e-05	0.000112907	CALCA,GNAS,POMC,PTH
523	Neurodegenerative Diseases	C0524851	15	706	5.10109e-05	0.000136375	ADCYAP1,ADRB2,CRHR1,DNM2,EGFR,FZD4,GCG,GPBAR1,KIAA0319,LDLR,SCARB2,SCT,TF,UBB,VIP
524	Femur Head Necrosis	C0015814	3	29	5.216e-05	0.000136636	APOB,POMC,TF
525	Hypothermia	C0020672	3	29	5.216e-05	0.000136897	GCG,LHB,TSHB
526	Aortic atherosclerosis	C0155733	3	29	5.216e-05	0.000137158	APOB,LDLR,LDLRAP1
527	Squamous Cell Neoplasms	C0206720	3	29	5.216e-05	0.000137419	EGF,EGFR,PTH
528	Eclampsia	C0013537	7	183	5.3909e-05	0.000137679	ADM,CRH,EGF,IAPP,INSL3,LHCGR,SYT1
529	Hypogonadotropic hypogonadism 7 with or without anosmia	C0022735	7	183	5.3909e-05	0.00013794	FSHB,FSHR,INSL3,KIAA0319,LHB,POMC,RXFP2
530	Optic neuropathy	C0029132	4	57	5.47231e-05	0.000138201	APOB,EGFR,LDLR,LDLRAP1
531	Neurologic, endocrine, and pancreatic disease, multisystem, infantile-onset	C0030286	4	57	5.47231e-05	0.000138462	AVP,GIP,POMC,SCT
532	Squamous cell carcinoma	C0007137	28	1855	5.5337e-05	0.000138722	ADM,ADRB2,AP2A1,AP2M1,CALCA,CD4,CRH,CTTN,DAB2,EGF,EGFR,FZD4,GHRH,GNAS,GPBAR1,IGF2R,MC1R,PICALM,PIK3C2A,POMC,PTGDR,PTHLH,SH3KBP1,SYT1,TFRC,TRIP10,VIPR1,WNT5A
533	Carcinoma of colon	C0699790	28	1856	5.5871e-05	0.000138983	ADM,ADORA2B,ADRB3,AVP,BIN1,CALCA,CD4,CTTN,DNM2,DVL2,EGF,EGFR,GCG,GLP2R,GNAS,HGS,HIP1,IAPP,LDLR,PTGER4,PTH,PTHLH,RPS27A,SNX9,TFRC,VIP,VIPR1,WNT5A
534	Cyst	C0010709	7	184	5.60199e-05	0.000139244	EGF,GNAS,INSL3,OCRL,PTGER2,RXFP2,SCT
547	Melanocytic nevus	C0027962	7	185	5.8199e-05	0.000142634	CGA,CRH,EGF,EGFR,LRP2,MC1R,POMC
548	Nodular goiter	C1318500	3	30	5.98497e-05	0.000142894	CALCA,GNAS,TSHR
549	Isolated somatotropin deficiency	C3714796	3	30	5.98497e-05	0.000143155	GHRH,GHRHR,POMC
550	Growth abnormality	C0262361	25	1578	5.99144e-05	0.000143416	AVP,AVPR2,CBL,CD3D,CD3G,DNM2,EGFR,FSHB,FSHR,FZD4,GHRHR,GNAS,LHCGR,MC2R,OCRL,P2RY11,POMC,PTH1R,PTHLH,SCARB2,TFRC,TSHB,TSHR,VAMP7,WNT5A
551	Hypersensitivity	C0020517	7	186	6.04484e-05	0.000143677	ADRB2,CRHR1,EGFR,NPSR1,PTGER4,SNX9,VIP
552	Postmenopausal osteoporosis	C0029458	5	95	6.30255e-05	0.000143937	CALCA,CALCR,PTGER4,PTH,PTHLH
553	Prolactinoma, familial	C0033375	5	95	6.30255e-05	0.000144198	EGFR,GHRHR,GNAS,LHB,POMC
554	Combined Hepatocellular Carcinoma and Cholangiocarcinoma	C0221287	12	497	6.38237e-05	0.000144459	ARRB1,ARRB2,CRH,CTTN,EGF,EGFR,IAPP,IGF2R,RPS27A,SCT,SCTR,TRIP10
555	Abnormality of cholesterol metabolism	C4025656	4	59	6.468e-05	0.00014472	APOB,LDLR,LDLRAP1,OCRL
556	Testicular Neoplasms	C0039590	6	139	6.55562e-05	0.00014498	EGF,EGFR,FSHR,GNAS,LHCGR,VAMP7
557	Hyponatremia	C0020625	3	31	6.83339e-05	0.000145241	AVP,AVPR2,OCRL
558	Glucose intolerance	C0271650	9	304	7.12999e-05	0.000145502	ADM,ADRB2,ADRB3,APOB,GCG,GCGR,GPR83,IAPP,MC3R
565	Abnormality of cation homeostasis	C4023646	7	192	7.55175e-05	0.000147327	AP2S1,AVPR2,EGF,GNAS,OCRL,PTH,PTH1R
566	Memory Loss	C0002622	4	61	7.59785e-05	0.000147588	AVP,DRD5,HTR7,POMC
567	Isolated growth hormone deficiency type 1B	C0013338	3	32	7.76615e-05	0.000147849	GHRH,GHRHR,POMC
568	Intestinal Neoplasms	C0021841	6	145	8.55676e-05	0.00014811	DVL2,EGFR,GCG,PTGDR,VIP,WNT5A
569	Connective Tissue Diseases	C0009782	7	196	8.7201e-05	0.00014837	ADM,ADRB2,CRH,CRHR1,POMC,PTGER2,TSHR
570	Sparse axillary hair	C1858574	3	33	8.78819e-05	0.000148631	FSHB,LHB,VAMP7
571	Abnormality of the level of lipoprotein cholesterol	C4023615	3	33	8.78819e-05	0.000148892	APOB,LDLR,LDLRAP1
572	Hereditary pancreatitis	C0238339	10	377	9.08367e-05	0.000149153	ADCYAP1,ADM,ADRB2,EGF,EGFR,GCG,GIP,PTHLH,SCT,SYT1
573	Hyperpituitarism	C0020506	4	64	9.57055e-05	0.000149413	FSHR,GNAS,LHCGR,VAMP7
580	Calcinosis	C0006663	5	103	9.89152e-05	0.000151239	APOB,GNAS,LDLR,POMC,PTH
581	Decreased beta-glucocerebrosidase protein and activity	C0205216	5	103	9.89152e-05	0.000151499	AVPR2,FSHB,GNAS,MC2R,VAMP7
582	Familial type 3 hyperlipoproteinemia	C0020479	3	34	9.90457e-05	0.00015176	APOB,IAPP,LDLR
583	Sentinel node (disorder)	C0677944	3	34	9.90457e-05	0.000152021	ADM,EGF,EGFR
584	Ameloblastoma	C0002448	4	65	0.000103085	0.000152282	EGF,EGFR,GNAS,PTHLH
585	Thyroid Nodule	C0040137	4	65	0.000103085	0.000152542	ARRB2,CALCA,GNAS,TSHR
586	Abnormal spermatogenesis	C0520933	5	104	0.000104355	0.000152803	FSHB,FSHR,LHCGR,OCRL,VAMP7
587	Senile plaques	C0333463	8	259	0.000108771	0.000153064	APOB,GIP,LDLR,LRP2,PTGDR,TF,UBB,WNT5A
588	Huntington's chorea	C0020179	9	320	0.000108798	0.000153325	CRH,FZD4,GPBAR1,HIP1,PTH,RPS27A,TFRC,TRIP10,UBC
589	Acute Coronary Syndrome	C0948089	9	320	0.000108798	0.000153585	ADRB1,ADRB2,ADRB3,APOB,ARPC1A,EGFR,LDLR,PICALM,PTGER2
590	Fetal Diseases	C0015929	6	151	0.0001103	0.000153846	ADRB2,CRH,CRHR1,POMC,PTGER2,TSHR
591	Hypoparathyroidism	C0020626	4	66	0.000110894	0.000154107	AP2S1,CALCA,PTH,PTH1R
592	Endemic Cretinism	C0342200	3	35	0.000111204	0.000154368	GNAS,TSHB,TSHR
593	heavy drinking	C0687132	3	35	0.000111204	0.000154628	ADRB2,CRHR1,POMC
594	Juvenile neuronal ceroid lipofuscinosis	C0751383	3	35	0.000111204	0.000154889	AGFG1,PICALM,TRIP10
595	Premature Obstetric Labor	C0022876	7	203	0.000111245	0.00015515	ADRB2,APOB,CRH,CRHR1,IGF2R,PTGER2,PTGER4
596	Heart Diseases	C0018799	10	386	0.000111805	0.000155411	ADM,ADRB1,APOB,CHRM2,EGFR,GCG,HTR4,PTGIR,RAMP3,VAMP8
597	Ulcerative colitis	C0009324	16	837	0.000113041	0.000155671	ADRB2,ARPC2,CALCA,CRH,CRHR1,DAB2,DNM2,EGFR,GLP2R,GPBAR1,GPR15,NPSR1,PTGER4,PTGIR,SYT1,VIPR1
598	Neurofibromatosis, type 1, 162200 (3)	C0027831	6	152	0.000114937	0.000155932	ADM,APOB,CGA,EGF,EGFR,POMC
599	Azoospermia	C0004509	8	261	0.000115285	0.000156193	APOB,FSHB,FSHR,GCG,IAPP,OCRL,VAMP7,WASL
600	Lymphoma, Large B-Cell, Diffuse	C0024299	22	1362	0.000115524	0.000156454	ARRB1,ARRB2,CALCA,CBL,CD3D,CD3G,CLTA,CLTC,EGF,EGFR,HIP1,IAPP,LDLRAP1,POMC,PTGDR,PTGER4,PTHLH,RPS27A,SCT,SYT1,TFRC,UBC
601	Posttraumatic stress disorder	C0038436	5	106	0.000115947	0.000156714	ADCYAP1,ADCYAP1R1,CRH,CRHR1,VIPR2
602	Abnormality of circulating hormone level	C4025652	8	262	0.000118662	0.000156975	FSHB,FSHR,GHRHR,GNAS,LHCGR,MC2R,POMC,VAMP7
608	Hypoparathyroidism - autosomal dominant	C0342345	3	36	0.000124409	0.00015854	AP2S1,NPS,PTH
609	Abnormality of the axillary hair	C4022287	3	36	0.000124409	0.000158801	FSHB,LHB,VAMP7
610	Non-Neoplastic Disorder	C1709246	11	461	0.000128122	0.000159061	ADM2,DAB2,EGF,EGFR,GHRHR,GLP2R,IAPP,PTHLH,SCT,SCTR,VIP
611	Abnormality of calcium homeostasis	C4025337	5	108	0.000128538	0.000159322	AP2S1,GNAS,OCRL,PTH,PTH1R
612	Malignant neoplasm of lung	C0242379	33	2460	0.000135449	0.000159583	ADCYAP1,ADCYAP1R1,ADM,ADRB2,AP2A1,ARRB1,AVP,CALCA,CALCR,CD4,CGA,CRH,DAB2,EGF,EGFR,GHRH,GHRHR,IAPP,IGF2R,LDLR,POMC,PTH,PTHLH,RAB5A,RAMP2,REPS1,SCT,SCTR,TFRC,VIP,VIPR1,VIPR2,WNT5A
613	Myocardial Infarction	C0027051	18	1019	0.000135468	0.000159844	ADM,ADRB1,ADRB2,ADRB3,APOB,CHRM2,DAB2,GCG,GHRH,IGF2R,LDLR,LDLRAP1,P2RY11,PTGER2,RAMP1,RLN2,TF,VAMP8
614	Dyspnea	C0013404	7	209	0.000135994	0.000160104	ADRB2,APOB,EGFR,GNAS,LDLR,LDLRAP1,POMC
615	Dysphonia	C0019825	4	69	0.000137063	0.000160365	BIN1,GNAS,TSHB,TSHR
616	Acute postoperative pain	C0030201	3	37	0.000138714	0.000160626	ADRB2,CALCA,POMC
617	Maternal diabetes	C0085207	7	210	0.000140529	0.000160887	ADORA2B,ADRB3,CBL,GCG,GIP,GNAS,IAPP
618	Growth retardation, intellectual developmental disorder, hypotonia, and hepatopathy, 617093 (3)	C0008073	6	158	0.000146196	0.000161147	CBL,EGF,EGFR,GNAS,KIAA0319,LRP2
619	Diabetic Nephropathies	C0011881	13	616	0.000147579	0.000161408	ADM,ADRB1,APOB,CALCRL,EGF,EGFR,GCG,IAPP,PTH,PTHLH,RAMP2,SYT1,TF
620	Acute kidney injury	C0022660	8	270	0.000148783	0.000161669	ADCYAP1,ADRB2,AGFG1,AVP,EGF,EGFR,LRP2,PTGER4
621	Pulmonary hypertension, neonatal, susceptibility to	C0020542	9	333	0.000150476	0.00016193	ADM,ADORA2B,ADRB1,CALCA,DNM2,EGF,NPS,RAMP2,VIP
703	Ovarian hyperstimulation syndrome	C0085083	3	38	0.000154172	0.000183312	CGA,FSHR,LHCGR
704	Multinodular goiter	C0342208	3	38	0.000154172	0.000183572	CALCA,CLTC,TSHR
705	Parathyroid carcinoma	C0687150	3	38	0.000154172	0.000183833	APOB,PTH,PTHLH
706	Benign neoplasm of other endocrine glands	C0086692	7	213	0.00015489	0.000184094	CLTC,CRH,EGF,EGFR,MC2R,POMC,PTH
707	Tumor Progression	C0178874	28	1969	0.000156727	0.000184355	ADM,ADM2,ADORA2B,AGFG1,AP2A1,ARRB1,ARRB2,BIN1,CALCA,CRH,CTTN,DAB2,DNM2,EGF,EGFR,FZD4,GHRH,GNAS,GPBAR1,GRB2,IAPP,POMC,PTGER2,PTH,PTHLH,SYT1,VIP,WNT5A
708	Gaucher Disease	C0017205	4	71	0.000156971	0.000184615	ADRB1,AGFG1,AVPR2,SCARB2
709	Multiple Endocrine Neoplasia Type 2a	C0025268	4	71	0.000156971	0.000184876	CALCA,GCG,POMC,PTH
710	Well Differentiated Pancreatic Endocrine Tumor	C1337011	4	71	0.000156971	0.000185137	CALCA,GCGR,GNAS,PTHLH
711	Abnormality of ion homeostasis	C4025654	7	214	0.000159938	0.000185398	AP2S1,AVPR2,EGF,GNAS,OCRL,PTH,PTH1R
712	Abnormality of the digestive system	C0266015	25	1679	0.000163196	0.000185658	AP2S1,APOB,AVP,AVPR2,BIN1,CD3D,CD3G,EGFR,FSHR,GNAS,IGF2R,LDLR,LDLRAP1,LRP2,MC1R,NECAP1,OCRL,POMC,PTH1R,SCARB2,TF,TFRC,TSHB,TSHR,WNT5A
713	Abnormality of adrenal physiology	C4023212	5	113	0.000164796	0.000185919	GNAS,MC2R,OCRL,POMC,VAMP7
714	Uremia	C0041948	4	72	0.000167717	0.00018618	EGFR,LDLR,PTH,PTH1R
715	Arrhythmias, Cardiac	C0003811	9	338	0.000169747	0.000186441	ADM,ADRB1,APOB,AVP,EGF,HTR4,LDLR,LDLRAP1,TSHR
716	Hay fever	C0018621	5	114	0.000172931	0.000186701	ADRB2,CD3D,EGFR,EPS15,PTGDR
717	early pregnancy	C0747845	5	114	0.000172931	0.000186962	CALCRL,CRH,EGFR,RAMP1,VIP
718	Angina pectoris	C0002962	4	73	0.000179015	0.000187223	APOB,AVP,LDLR,LDLRAP1
719	Abnormal consumption behavior	C4073150	4	73	0.000179015	0.000187484	AVP,AVPR2,GNAS,POMC
720	Acquired long QT syndrome	C0023976	5	115	0.00018138	0.000187744	ADRB1,ADRB2,DNM2,POMC,TF
721	Hyperactivity	C0424295	7	219	0.000187252	0.000188005	CALCA,CRHR1,GCG,LHCGR,NPS,OCRL,TSHR
731	Hypophosphatemia	C0085682	3	40	0.000188765	0.000190613	GNAS,OCRL,PTH1R
732	Rhinovirus infection	C0276447	3	40	0.000188765	0.000190874	EGFR,LDLR,SYT1
733	Learning Disabilities	C0751265	3	40	0.000188765	0.000191134	KIAA0319,PTH,PTHLH
734	Choriocarcinoma	C0008497	8	279	0.000190051	0.000191395	ADM,CALCA,CALCRL,CGA,CRH,DAB2,EGF,EGFR
735	Nodule	C0028259	5	116	0.000190152	0.000191656	EGFR,GCG,GIP,GNAS,TSHR
736	Ovarian cyst	C0029927	5	116	0.000190152	0.000191917	EGF,EGFR,FSHR,GNAS,PTGER4
737	Gastric ulcer	C0038358	5	116	0.000190152	0.000192177	ADM,ADRB3,EGF,EGFR,IAPP
738	Nephrolithiasis	C0392525	5	116	0.000190152	0.000192438	AP2S1,CALCR,GNAS,OCRL,PTH
739	Neoplasm of the adrenal cortex	C0001618	4	74	0.000190885	0.000192699	GIP,GNAS,MC2R,POMC

## Sheet: Salmeterol_merged_network
ADRB2	AP2B1	0.866922
ADRB2	AP2A1	0.866922
ADRB2	MC1R	0.825222
ADRB2	SH3GL2	0.865612
ADRB2	LRP2	0.863443
ADRB2	PTH1R	0.835401
ADRB2	CTTN	0.862834
ADRB2	ACTR2	0.862834
ADRB2	CGA	0.849809
ADRB2	HIP1R	0.862834
ADRB2	ADCYAP1R1	0.835401
ADRB2	CHRM2	0.863443
ADRB2	P2RY11	0.825222
ADRB2	ARPC3	0.862834
ADRB2	BIN1	0.863443
ADRB2	RAB5A	0.812939
ADRB2	TAAR1	0.835401
ADRB2	OCRL	0.861336
ADRB2	FCHO2	0.858303
ADRB2	ADORA2B	0.835401
ADRB2	GHRHR	0.835401
ADRB2	STON2	0.863443
ADRB2	FSHB	0.840768
ADRB2	VAMP3	0.863443
ADRB2	MC5R	0.825222
ADRB2	GCG	0.849809
ADRB2	SNX9	0.863443
ADRB2	PTGDR	0.825222
ADRB2	TFRC	0.863443
ADRB2	PIK3C2A	0.844129
ADRB2	GRB2	0.863443
ADRB2	GPR150	0.825222
ADRB2	NPSR1	0.835401
ADRB2	GIPR	0.835401
ADRB2	FCHO1	0.858303
ADRB2	HTR4	0.835401
ADRB2	VAMP2	0.863443
ADRB2	SCT	0.840768
ADRB2	GPR27	0.825222
ADRB2	CLTCL1	0.866143
ADRB2	VAMP8	0.863443
ADRB2	ADM2	0.840768
ADRB2	PTH2	0.840768
ADRB2	NECAP1	0.866462
ADRB2	SYT1	0.863443
ADRB2	ARPC4	0.862834
ADRB2	TRIP10	0.863443
ADRB2	GCGR	0.835401
ADRB2	AP2S1	0.866922
ADRB2	NPS	0.840768
ADRB2	GPR45	0.825222
ADRB2	DVL2	0.863443
ADRB2	HRH2	0.835401
ADRB2	RAMP1	0.842196
ADRB2	CLTB	0.866143
ADRB2	PICALM	0.863443
ADRB2	DNM2	0.862138
ADRB2	FNBP1	0.863443
ADRB2	HTR6	0.835401
ADRB2	SYNJ2	0.861336
ADRB2	CALCR	0.842196
ADRB2	GPR84	0.825222
ADRB2	STAM	0.863443
ADRB2	EPS15L1	0.863443
ADRB2	GPR15	0.825222
ADRB2	SH3KBP1	0.863443
ADRB2	GHRH	0.840768
ADRB2	ARPC5	0.862834
ADRB2	PTGIR	0.835401
ADRB2	KIAA0319	0.863443
ADRB2	rs1042714	0.99
ADRB2	CD3D	0.863443
ADRB2	GNB1	0.852646
ADRB2	SCARB2	0.863443
ADRB2	TF	0.863443
ADRB2	RXFP1	0.835401
ADRB2	CD3G	0.863443
ADRB2	AVPR2	0.865531
ADRB2	POMC	0.83332
ADRB2	ARRB1	0.865385
ADRB2	AP2M1	0.866922
ADRB2	FSHR	0.835401
ADRB2	rs1042713	0.99
ADRB2		1
ADRB2	VIPR1	0.825222
ADRB2	FZD4	0.863443
ADRB2	GLP2R	0.835401
ADRB2	RLN3	0.840768
ADRB2	CALCB	0.840768
ADRB2	LDLR	0.863443
ADRB2	RAMP2	0.842196
ADRB2	SYT2	0.863443
ADRB2	CALCRL	0.842196
ADRB2	SGIP1	0.866462
ADRB2	LDLRAP1	0.863443
ADRB2	CRHR1	0.835401
ADRB2	FNBP1L	0.863443
ADRB2	STAM2	0.863443
ADRB2	EPN2	0.863443
ADRB2	VIP	0.83332
ADRB2	ITSN1	0.866462
ADRB2	LHB	0.840768
ADRB2	VIPR2	0.825222
ADRB2	IGF2R	0.863443
ADRB2	PTGER2	0.825222
ADRB2	GPR20	0.825222
ADRB2	GPHB5	0.840768
ADRB2	EGF	0.863443
ADRB2	AGFG1	0.863443
ADRB2	GPR83	0.825222
ADRB2	ADCYAP1	0.840768
ADRB2	LHCGR	0.835401
ADRB2	CRH	0.840768
ADRB2	TSHR	0.835401
ADRB2	GPR176	0.825222
ADRB2	GRK6	0.808612
ADRB2	WASL	0.862834
ADRB2	AP2A2	0.866922
ADRB2	GPHA2	0.840768
ADRB2	DRD5	0.835401
ADRB2	PTH	0.840768
ADRB2	ACTR3	0.862834
ADRB2	CLTC	0.866409
ADRB2	UBA52	0.863443
ADRB2	INSL3	0.840768
ADRB2	TGOLN2	0.863443
GNAS	rs62205366	0.846398
ADRB2	REPS1	0.866462
ADRB2	RXFP2	0.835401
ADRB2	rs1042718	0.99
ADRB2	WNT5A	0.863443
ADRB2	ARRB2	0.865385
ADRB2	HGS	0.863443
ADRB2	SYT9	0.863443
ADRB2	CALCA	0.840768
ADRB2	CD4	0.863443
ADRB2	CLTA	0.866409
ADRB2	EPN1	0.863443
ADRB2	GPR32	0.825222
ADRB2	GIP	0.840768
ADRB2	GPR25	0.825222
ADRB2	PACSIN2	0.863443
ADRB2	MC2R	0.825222
ADRB2	AVP	0.865777
ADRB2	SCTR	0.835401
ADRB2	RAMP3	0.842196
ADRB2	MC3R	0.825222
ADRB2	UBB	0.863443
ADRB2	AAK1	0.866307
ADRB2	SYNJ1	0.861336
ADRB2	RPS27A	0.863443
ADRB2	ADRB2	0.866075
ADRB2	ADM	0.840768
ADRB2	GAK	0.851138
ADRB2	ARPC2	0.862834
ADRB2	HIP1	0.862834
ADRB2	CBL	0.863443
ADRB2	GRK3	0.808612
ADRB2	UBC	0.863443
ADRB2	PTHLH	0.840768
ADRB2	HTR7	0.835401
ADRB2	REPS2	0.863443
ADRB2	GPBAR1	0.835401
ADRB2	PTGER4	0.825222
ADRB2	ADRB3	0.835401
ADRB2	APOB	0.863443
ADRB2	RLN2	0.845981
ADRB2	M6PR	0.863443
ADRB2	DNAJC6	0.851138
ADRB2	GNAS	0.854948
ADRB2	EGFR	0.863443
ADRB2	SLC2A8	0.863443
ADRB2	SLC18A3	0.863443
ADRB2	VAMP7	0.863443
ADRB2	ARPC1A	0.862834
ADRB2	DAB2	0.863981
ADRB2	PTH2R	0.835401
ADRB2	AMPH	0.863443
ADRB2	TSHB	0.840768
ADRB2	ADRB1	0.835401
ADRB2	IAPP	0.840768
ADRB2	VAMP4	0.863443
ADRB2	GNG2	0.852646
ADRB2	EPS15	0.866702
CYP3A5	rs17161788	0.99
CYP3A5	CYP3A5*1A, CYP3A5*3A, CYP3A5*6, CYP3A5*7	0.99
CYP3A5		1
CYP3A5	rs10264272	0.99
CYP3A5	rs776746	0.99
CYP3A5	CYP3A5*1A, CYP3A5*3A	0.99
CYP3A5	rs41303343	0.99
CYP3A4	rs2242480	0.99
CYP3A4	rs35599367	0.99
CYP3A4	CYP3A4*1, CYP3A4*22	0.99
CYP3A4	CYP3A4*1, CYP3A4*4	0.99
CYP3A4	CYP3A4*1, CYP3A4*20, CYP3A4*8	0.99
CYP3A4	rs56324128	0.99
CYP3A	rs2740574	0.970299
CYP3A4	CYP3A4*1, CYP3A4*1G	0.99
CYP3A	rs12721627	0.970299
rs2740574	CYP3A	0.94148
CYP3A4	rs4986910	0.99
CYP3A4	rs4646437	0.99
CYP3A4	rs4646440	0.99
CYP3A4	rs2740574	0.99
CYP3A4	MGST1	0.79211
CYP3A4	rs3735451	0.99
CYP3A4		1
CYP3A4	rs12721627	0.99
rs4987161	CYP3A	0.9801
CYP3A4	rs28371759	0.99
CYP3A4	rs2246709	0.99
rs4987161	CYP3A4	0.886385
rs2740574	CYP3A4	0.922745
CYP3A4	rs4987161	0.99
rs12721627	CYP3A4	0.960596
CYP3A	rs4987161	0.895338
CYP3A4	MGST3	0.79211
CYP3A4	MGST2	0.79211
CYP2C8	rs11572076	0.99
CYP2C8	rs10509681	0.99
CYP2C8	rs1934951	0.99
CYP2C8	rs11572103	0.99
CYP2C8	CYP2C8*1A, CYP2C8*2, CYP2C8*3	0.99
CYP2C8		1
CYP2C8	rs11572080	0.99
CYP2C8	rs1113129	0.99

## Sheet: Salmeterol_phenotype_associatio
rank	phenotype	cui	assoc in neigh	assoc in intom	probability	Benjamini-Hochberg	genes
110	Acth-Independent Macronodular Adrenal Hyperplasia	C1857451	9	40	4.26675e-11	2.84238e-05	AVP,FZD4,GIP,GIPR,GNAS,GPBAR1,HTR4,MC2R,POMC
111	Abnormality of the pituitary gland	C0032002	32	645	6.46936e-11	2.86822e-05	ADCYAP1,ADCYAP1R1,ADM,APOB,AVP,AVPR2,CALCA,CRH,CRHR1,EGF,EGFR,FSHB,FSHR,GCG,GHRH,GHRHR,GNAS,INSL3,LDLR,LHB,LHCGR,MC2R,POMC,PTH,PTHLH,SCT,TSHB,TSHR,VAMP7,VIP,VIPR1,VIPR2
112	Neoplasm of the adrenal gland	C0001624	12	111	7.9703e-11	2.89406e-05	ADM2,AVPR2,CGA,CRH,FSHR,GIP,GIPR,GNAS,LHCGR,MC2R,POMC,TSHR
113	Alzheimer Disease	C0002395	43	1699	8.82275e-11	2.9199e-05	ADRB1,ADRB2,ADRB3,AP2A2,APOB,ARRB2,BIN1,CALCR,CHRM2,CRH,DAB2,DNM2,DRD5,EGFR,FSHR,GHRH,GHRHR,GRB2,HTR6,IAPP,IGF2R,ITSN1,LDLR,LHB,LHCGR,LRP2,M6PR,MGST3,NPS,PICALM,PTGDR,PTGER2,PTGER4,PTGIR,PTH,PTH1R,SH3GL2,SLC18A3,SYNJ1,SYT1,TF,UBB,VAMP2
114	Secondary hyperparathyroidism	C0020503	15	182	9.96776e-11	2.94574e-05	CALCR,CALCRL,EGF,EGFR,GHRHR,GIP,GIPR,GNAS,GRK6,LHCGR,POMC,PTH,PTH1R,TFRC,VIPR1
115	Pheochromocytoma	C0031511	17	259	1.20788e-10	2.97158e-05	ACTR2,ADCYAP1,ADM,CALCA,CALCRL,CRH,EGF,GCG,GCGR,GNAS,HTR4,MC1R,POMC,PTH,RAMP2,SCTR,VIPR1
116	Kidney Failure, Chronic	C0022661	25	616	1.33752e-10	2.99742e-05	ADM,ADRB1,ADRB2,ADRB3,AP2M1,APOB,CRH,CRHR1,CYP2C8,CYP3A4,CYP3A5,DAB2,EGF,GCGR,IAPP,IGF2R,LDLR,LHCGR,LRP2,POMC,PTGER4,PTH,PTH1R,PTHLH,VIPR1
117	Neuroendocrine neoplasm	C0206754	16	252	1.5061e-10	3.02326e-05	ADCYAP1R1,CRH,EGF,EGFR,FZD4,GCG,GCGR,GHRH,GIP,GIPR,GNAS,GPBAR1,IAPP,POMC,PTH,PTHLH
119	Migraine Disorders	C0149931	18	333	1.78412e-10	3.07494e-05	ADCYAP1,ADCYAP1R1,ADRB2,CALCA,CLTA,CYP3A4,DRD5,FSHR,GNAS,HTR4,HTR6,HTR7,LDLR,RAMP1,VIP,VIPR1,VIPR2,WASL
120	Malignant tumor of prostate	C0376358	59	2940	1.948e-10	3.10078e-05	ACTR2,ADCYAP1,ADCYAP1R1,ADM,ARRB2,BIN1,CALCA,CALCR,CGA,CLTC,CRH,CRHR1,CYP3A4,CYP3A5,DAB2,DNM2,EGF,EGFR,FSHB,FSHR,FZD4,GAK,GCG,GHRH,GHRHR,GNAS,HIP1,IAPP,IGF2R,KIAA0319,LDLR,LHB,LHCGR,LRP2,M6PR,MC1R,MC2R,PACSIN2,PIK3C2A,POMC,PTGER2,PTGER4,PTH,PTHLH,RAMP1,REPS1,REPS2,RXFP1,SCARB2,SCTR,STAM2,SYT1,TF,TFRC,VAMP3,VIP,VIPR1,VIPR2,WNT5A
121	Cushing's syndrome	C0010481	7	34	4.63156e-10	3.12661e-05	CRH,GIP,GIPR,GNAS,LHCGR,MC2R,POMC
122	Bipolar affective disorder	C0005586	27	817	5.32031e-10	3.15245e-05	ADCYAP1,ADCYAP1R1,ADM,ADRB2,APOB,AVP,CALCA,CHRM2,CRH,CRHR1,DRD5,GHRH,HIP1R,HTR4,HTR7,KIAA0319,MC2R,MC5R,POMC,RPS27A,SYNJ1,TSHB,UBC,VAMP2,VAMP3,VAMP7,VIP
123	Pituitary adenoma	C0032000	16	286	5.3713e-10	3.17829e-05	ARRB1,ARRB2,CGA,CRH,CRHR1,EGF,EGFR,FSHB,FSHR,GHRH,GHRHR,GNAS,GRB2,MC2R,POMC,TFRC
125	Essential hypertension	C0085580	16	305	1.40417e-09	3.22997e-05	ADM,ADRB1,ADRB2,ADRB3,APOB,CALCA,CALCRL,CYP3A5,DNM2,FSHR,GCGR,GNAS,LDLR,POMC,PTH,VIP
126	Adrenocortical carcinoma	C0206686	12	160	1.40997e-09	3.25581e-05	ADM,EGF,EGFR,GHRHR,GIPR,HTR7,IGF2R,LHCGR,MC2R,POMC,SH3KBP1,VIP
127	Adenomas, multiple colorectal, 608456 (3)	C0001430	29	975	1.42916e-09	3.28165e-05	ADORA2B,ARRB1,CALCA,CGA,CRH,CRHR1,CYP2C8,DNM2,EGF,EGFR,GHRH,GHRHR,GIP,GNAS,HGS,HTR4,IGF2R,INSL3,LHCGR,MC2R,POMC,PTGER2,PTGER4,PTH,PTHLH,SCTR,TFRC,TRIP10,TSHR
128	Acute-Phase Reaction	C0001349	6	26	1.84602e-09	3.30749e-05	MC1R,MC2R,MC3R,MC5R,TF,TFRC
129	Hypertension	C0020538	39	1647	1.99914e-09	3.33333e-05	ADM,ADORA2B,ADRB1,ADRB2,ADRB3,APOB,AVP,AVPR2,CALCA,CALCRL,CRHR1,CYP2C8,CYP3A4,CYP3A5,DNM2,EGF,EGFR,FSHR,GCG,GCGR,GNAS,GPR83,HGS,HTR4,IAPP,LDLR,LDLRAP1,LHB,LRP2,M6PR,MC2R,MC3R,MGST3,POMC,PTGER4,PTH,RAMP1,RAMP2,SCARB2
130	Medullary thyroid carcinoma	C0238462	13	201	2.3923e-09	3.35917e-05	CALCA,CALCB,CALCR,EGF,EGFR,IAPP,INSL3,POMC,PTH,RAMP1,RXFP1,RXFP2,TSHR
131	Mood Disorders	C0525045	16	322	3.08578e-09	3.38501e-05	ADRB1,ADRB2,ADRB3,ARRB2,AVP,CALCA,CHRM2,CRH,CRHR1,DRD5,HIP1R,HTR4,HTR6,HTR7,TGOLN2,VAMP7
132	Breast-ovarian cancer, familial 1	C0006142	74	4543	3.19397e-09	3.41085e-05	ADM,ADRB1,ADRB2,ADRB3,AGFG1,AMPH,AP2A1,APOB,ARRB1,ARRB2,AVP,BIN1,CALCA,CALCR,CD3D,CD4,CGA,CLTC,CRH,CRHR1,CTTN,CYP2C8,CYP3A4,CYP3A5,DAB2,DNAJC6,DNM2,DRD5,DVL2,EGF,EGFR,FNBP1L,FSHB,FSHR,GCG,GHRH,GHRHR,GNAS,GRB2,IAPP,IGF2R,KIAA0319,LDLR,LHB,LHCGR,LRP2,MC1R,MC2R,MC3R,PICALM,POMC,PTGER4,PTGIR,PTH,PTH1R,PTHLH,RAB5A,REPS2,RLN2,RPS27A,SH3GL2,SH3KBP1,SNX9,SYNJ2,SYT1,TF,TFRC,TRIP10,UBC,VAMP7,VIP,VIPR1,WASL…
133	Pseudohypoparathyroidism, Type Ia	C3494506	6	28	3.19741e-09	3.43669e-05	CALCA,GHRH,GNAS,PTH,PTHLH,VIP
139	Hyperparathyroidism 4	C0020502	8	68	6.67958e-09	3.59173e-05	AP2S1,CALCA,EGFR,GNAS,OCRL,PTH,PTH1R,PTHLH
140	Prostate carcinoma	C0600139	52	2734	8.3675e-09	3.61757e-05	ACTR2,ADCYAP1,ADCYAP1R1,ADM,ARRB2,BIN1,CALCA,CALCR,CGA,CLTC,CRH,CRHR1,CYP3A4,CYP3A5,DAB2,DNM2,EGF,EGFR,FZD4,GAK,GCG,GHRH,GHRHR,GNAS,HIP1,IAPP,IGF2R,INSL3,KIAA0319,LHCGR,LRP2,M6PR,MC1R,PTGER2,PTGER4,PTH,PTHLH,RAMP1,REPS1,REPS2,RXFP1,RXFP2,SCARB2,SCTR,SYT1,TF,TFRC,VAMP3,VIP,VIPR1,VIPR2,WNT5A
142	Breast carcinoma	C0678222	69	4281	2.04876e-08	3.66925e-05	ADM,ADRB1,ADRB2,ADRB3,AGFG1,AMPH,AP2A1,APOB,ARRB1,ARRB2,AVP,BIN1,CALCA,CALCR,CD3D,CGA,CLTC,CRH,CRHR1,CTTN,CYP2C8,CYP3A4,CYP3A5,DAB2,DNAJC6,DNM2,DRD5,DVL2,EGF,EGFR,FNBP1L,GCG,GHRH,GHRHR,GNAS,GRB2,IAPP,IGF2R,KIAA0319,LDLR,LHB,LHCGR,LRP2,MC1R,MC3R,POMC,PTGER4,PTGIR,PTH,PTH1R,PTHLH,RAB5A,REPS2,RLN2,RPS27A,SH3GL2,SH3KBP1,SNX9,SYNJ2,SYT1,TF,TFRC,TRIP10,UBC,VAMP7,VIP,VIPR1,WASL,WNT5A
147	Heart Failure	C0018801	24	803	2.8714e-08	3.79845e-05	ADM,ADRB1,ADRB2,ADRB3,ARRB1,ARRB2,AVP,AVPR2,BIN1,CALCR,CTTN,DNM2,EGFR,FZD4,GCG,GPBAR1,HTR4,POMC,PTH,PTHLH,RAMP2,SCARB2,SH3GL2,TFRC
148	Asthma	C0004096	34	1454	2.88518e-08	3.82429e-05	ADCYAP1R1,ADM,ADORA2B,ADRB2,CALCA,CHRM2,CRH,CRHR1,CTTN,CYP3A4,EGF,EGFR,FZD4,GHRH,GNAS,GNB1,GPBAR1,LDLR,NPS,NPSR1,POMC,PTGDR,PTGER2,PTGER4,PTGIR,PTH,RAB5A,RAMP1,SCARB2,SLC18A3,SNX9,SYT1,TF,VIP
149	Diabetes mellitus type 2	C0011860	41	1972	3.21204e-08	3.85013e-05	ADCYAP1,ADM,ADORA2B,ADRB1,ADRB2,ADRB3,APOB,ARRB2,AVP,CALCA,CBL,CD4,CRHR1,CYP2C8,CYP3A4,CYP3A5,EGF,EGFR,FZD4,GCG,GCGR,GIP,GIPR,GPBAR1,GPR20,GRB2,IAPP,IGF2R,LDLR,MC2R,MC3R,MC5R,MGST3,PIK3C2A,POMC,PTGER4,PTH,TF,TFRC,VAMP2,VAMP3
150	Neuroblastoma	C0700095	36	1612	3.73953e-08	3.87597e-05	ADCYAP1,ADCYAP1R1,ADM,ADRB2,AVP,BIN1,CALCA,CALCR,CGA,CRH,CYP3A4,CYP3A5,EGF,EGFR,GCG,GNAS,GRB2,HGS,ITSN1,KIAA0319,LDLR,LRP2,MGST1,PTGDR,PTGER2,PTGER4,PTHLH,SCT,SYNJ1,SYT1,TFRC,TSHR,UBB,VIP,VIPR1,VIPR2
151	Anxiety Disorders	C0003469	16	383	3.87165e-08	3.90181e-05	ADCYAP1,ADCYAP1R1,ADRB2,ARRB2,AVP,CRH,CRHR1,CYP3A4,GHRH,GNB1,HTR6,HTR7,MC1R,NPS,NPSR1,POMC
152	Hyperlipidemia, combined, 1	C0020473	14	293	3.9252e-08	3.92765e-05	ADM,ADRB1,ADRB2,ADRB3,APOB,CYP2C8,CYP3A4,CYP3A5,FSHR,GCG,LDLR,LDLRAP1,LRP2,PTH
153	Hypercholesterolemia, autosomal dominant, type B	C0020443	12	212	3.97848e-08	3.95349e-05	ADRB2,APOB,AVP,CALCR,CYP3A4,CYP3A5,DAB2,LDLR,LDLRAP1,LRP2,OCRL,PICALM
154	Hyperplasia	C0020507	10	143	4.49281e-08	3.97933e-05	EGFR,GNAS,HTR4,INSL3,LDLR,LHCGR,POMC,PTGIR,RLN2,RLN3
155	Cholera	C0008354	8	86	5.41154e-08	4.00517e-05	APOB,EGF,EGFR,LHCGR,POMC,PTH,PTHLH,VIP
156	Pseudohypoparathyroidism, type IB, 603233 (3)	C1864100	5	25	5.66317e-08	4.03101e-05	GHRH,GNAS,PTH,PTH1R,PTHLH
157	Schizophrenia	C0036341	40	1947	6.59342e-08	4.05685e-05	ACTR2,ADCYAP1,ADCYAP1R1,ADM,ADRB3,APOB,ARRB2,AVP,CHRM2,CLTB,CRH,CRHR1,CYP3A4,CYP3A5,DNAJC6,DNM2,DRD5,EGF,GIPR,GNAS,GNB1,GRB2,HRH2,HTR4,HTR6,HTR7,KIAA0319,MC2R,MC5R,NPS,NPSR1,PIK3C2A,POMC,SH3GL2,STON2,TAAR1,TF,VAMP2,VIP,VIPR2
158	Delayed puberty	C0034012	11	186	7.67351e-08	4.08269e-05	CRH,FSHB,FSHR,GHRH,IGF2R,LHB,LHCGR,OCRL,POMC,SCARB2,VAMP7
165	Alcohol dependence	C0001973	21	675	9.33832e-08	4.26357e-05	ADRB2,AP2B1,AVP,CALCA,CHRM2,CRH,CRHR1,DAB2,EGF,FSHB,GNAS,HIP1,HTR7,KIAA0319,LHB,LRP2,POMC,SGIP1,STON2,TF,TGOLN2
166	Liver Cirrhosis, Biliary	C0023890	25	919	9.89073e-08	4.28941e-05	ADM,ADRB1,ADRB2,ADRB3,APOB,ARRB2,AVP,CYP3A4,CYP3A5,EGF,EGFR,GCG,IGF2R,POMC,PTH,RAMP2,RPS27A,RXFP1,RXFP2,SCARB2,STAM,SYT1,TF,TFRC,VIPR1
167	Bone necrosis	C0029445	6	45	1.04885e-07	4.31525e-05	APOB,CYP2C8,CYP3A4,PTH,PTH1R,TF
168	Pituitary corticotropic cell adenoma	C1306214	6	45	1.04885e-07	4.34109e-05	CRHR1,EGFR,GHRH,GNAS,MC2R,POMC
169	Prostatic Neoplasms	C0033578	35	1606	1.05508e-07	4.36693e-05	ADCYAP1,ADCYAP1R1,ADM,ADRB2,ARRB2,BIN1,CALCA,CALCR,CBL,CGA,CYP3A4,CYP3A5,DAB2,EGF,EGFR,GHRH,GHRHR,GNAS,HIP1,IGF2R,LHB,LRP2,M6PR,MC2R,PTGER2,PTGER4,PTHLH,REPS2,RLN2,RPS27A,SYNJ2,VAMP8,VIP,VIPR1,WNT5A
170	Disorder of endocrine system	C0014130	7	68	1.20008e-07	4.39276e-05	CALCA,CALCR,CRH,GNAS,POMC,PTH,TSHR
171	Pain	C0030193	20	628	1.21445e-07	4.4186e-05	ADM,ADRB2,APOB,AVP,CALCA,CLTC,CLTCL1,CRH,FSHR,GNAS,HTR7,LDLR,LDLRAP1,MC1R,POMC,PTH,PTH1R,SCARB2,SLC18A3,VIP
173	Alcohol abuse	C0085762	8	95	1.29284e-07	4.47028e-05	AVP,CHRM2,CRHR1,CYP3A4,EGFR,HTR7,LDLR,POMC
174	Squamous Cell Neoplasms	C0206720	5	29	1.47456e-07	4.49612e-05	CYP3A4,CYP3A5,EGF,EGFR,PTH
175	Pituitary dependent hypercortisolism	C0221406	5	29	1.47456e-07	4.52196e-05	EGF,EGFR,GNAS,MC2R,POMC
177	Pseudohypoparathyroidism type 1A	C0033806	5	30	1.82987e-07	4.57364e-05	CALCA,GHRH,GNAS,PTH,PTHLH
178	Female infertility	C0021361	7	72	1.88676e-07	4.59948e-05	ADRB2,ADRB3,FSHB,FSHR,LHB,LHCGR,TSHR
179	Inflammation	C0021368	20	647	1.98887e-07	4.62532e-05	ADCYAP1,ADM,ADRB2,ADRB3,APOB,BIN1,CALCA,CHRM2,CRH,CRHR1,CYP3A4,EGF,EGFR,POMC,PTGER2,PTGER4,TF,TFRC,TSHR,VIP
180	Obesity, severe, 601665 (3)	C0028756	9	131	1.99974e-07	4.65116e-05	ADRB1,ADRB2,ADRB3,GNAS,LDLR,MC2R,MC3R,MC5R,POMC
181	Animal Mammary Neoplasms	C0024667	44	2352	2.15285e-07	4.677e-05	ADM,ADORA2B,AGFG1,AP2A1,APOB,BIN1,CD4,CGA,CRH,CRHR1,CTTN,CYP2C8,CYP3A4,CYP3A5,DAB2,DNM2,EGF,EGFR,FNBP1L,GHRH,GRB2,HIP1,IGF2R,LHB,LHCGR,PTGER2,PTGER4,PTH1R,PTHLH,REPS1,REPS2,SH3GL2,SH3KBP1,SNX9,SYNJ2,SYT1,TF,TFRC,TRIP10,TSHR,VAMP8,VIP,WASL,WNT5A
185	Anorexia nervosa 1	C0003125	8	107	3.60993e-07	4.78036e-05	ADRB3,CRH,GCG,HTR7,LDLR,LRP2,MC3R,POMC
186	Hyperalgesia	C0020429	10	177	3.93087e-07	4.8062e-05	ADM,ADRB1,AVP,CALCA,CRH,HTR7,MC1R,PTGER4,PTHLH,VIP
187	Malignant neoplasm of pancreas	C0346647	34	1625	4.18756e-07	4.83204e-05	ACTR2,ADM,ADRB2,ADRB3,AP2A1,ARPC1A,AVP,CALCRL,CBL,CLTC,CTTN,DAB2,DNM2,EGF,EGFR,GCG,GHRH,IAPP,IGF2R,KIAA0319,LRP2,PTGER4,PTH,PTHLH,RAMP3,REPS1,SCT,SCTR,SYT1,SYT9,TF,TFRC,VIP,WNT5A
188	Benign melanocytic nevus	C1456781	7	80	4.30846e-07	4.85788e-05	CGA,CRH,EGF,EGFR,LRP2,MC1R,POMC
190	Increased analgesia from kappa-opioid receptor agonist, female-specific	C0205217	7	81	4.74529e-07	4.90956e-05	FSHR,GNAS,LDLRAP1,LHCGR,MC1R,MC2R,VAMP7
191	Obesity	C0028754	41	2181	5.03441e-07	4.9354e-05	ADM,ADRB1,ADRB2,ADRB3,APOB,CALCA,CALCRL,CHRM2,CRH,CRHR1,CYP3A4,DNAJC6,EGF,EGFR,FSHR,FZD4,GCG,GCGR,GHRH,GIP,GIPR,GNAS,GPBAR1,GPR83,IAPP,IGF2R,LDLR,LHCGR,LRP2,MC1R,MC3R,MC5R,P2RY11,PICALM,POMC,RAMP2,SGIP1,TF,TFRC,VIP,WNT5A
192	Osteomalacia	C0029442	5	36	5.75011e-07	4.96124e-05	AVPR2,CYP3A4,LRP2,OCRL,PTH
193	Ovarian Neoplasms	C0919267	24	942	5.80159e-07	4.98708e-05	ACTR2,ACTR3,ADM,CALCA,CALCR,CGA,CRH,CRHR1,CTTN,CYP3A4,CYP3A5,DAB2,EGF,EGFR,FSHR,GHRH,GPR150,GRB2,IGF2R,INSL3,LHCGR,POMC,PTGER2,VAMP7
199	Renal Insufficiency, Chronic	C0035078	14	363	6.18477e-07	5.14212e-05	ADCYAP1,ADM,ADRB2,CRH,EGF,EGFR,GHRH,LDLR,OCRL,PTH,PTH1R,PTHLH,SCARB2,SCT
203	Tachycardia	C3827868	9	149	6.6217e-07	5.24548e-05	ADRB1,ADRB2,GCG,GNAS,HTR4,LHB,SCT,TSHR,VIP
204	Metabolic Syndrome X	C0524620	19	638	6.77535e-07	5.27132e-05	ADCYAP1,ADM,ADRB1,ADRB2,ADRB3,APOB,CYP3A4,FSHR,GCG,GIP,GIPR,IGF2R,LDLR,LRP2,MC3R,POMC,SYT1,VIP,VIPR2
205	Lung Neoplasms	C0024121	27	1155	7.10367e-07	5.29716e-05	ADCYAP1,ADCYAP1R1,ADM,ADRB2,AMPH,ARRB1,AVP,CALCA,CYP3A4,CYP3A5,DAB2,DVL2,EGF,EGFR,EPS15,IGF2R,MGST1,POMC,PTGDR,PTGER2,PTGER4,PTHLH,RAMP2,TF,TFRC,TSHR,WNT5A
206	Attention deficit hyperactivity disorder	C1263846	17	527	7.43646e-07	5.323e-05	ADRB1,ADRB2,ARRB2,CLTA,DAB2,DRD5,HTR4,KIAA0319,LHCGR,NPSR1,OCRL,POMC,PTGER4,PTHLH,SYT1,SYT2,VAMP2
207	Osteoporosis	C0029456	19	642	7.46396e-07	5.34884e-05	CALCA,CALCR,CRHR1,CYP3A4,FSHR,GHRH,GHRHR,GNAS,INSL3,LDLR,MGST3,POMC,PTGER4,PTH,PTH1R,PTH2R,PTHLH,RXFP2,VAMP7
209	Carcinoid tumor no ICD-O subtype	C0334299	7	87	8.25052e-07	5.40052e-05	CALCA,EGF,EGFR,GHRH,POMC,PTH,PTHLH
210	Polycystic Ovary Syndrome	C0032460	16	477	8.54872e-07	5.42636e-05	ADRB2,ADRB3,APOB,FSHB,FSHR,GHRH,GNAS,IGF2R,INSL3,LHB,LHCGR,POMC,PTH,SCT,TFRC,WNT5A
211	Adrenocortical adenoma	C0206667	7	89	9.82695e-07	5.4522e-05	ADM,AVP,EGFR,GIP,GIPR,MC2R,POMC
212	Pancreatic Carcinoma	C0235974	34	1690	1.03754e-06	5.47804e-05	ACTR2,ADCYAP1,ADM,ADRB2,ADRB3,AP2A1,ARPC1A,AVP,CALCRL,CBL,CLTC,CTTN,DNM2,EGF,EGFR,FZD4,GCG,GPBAR1,IAPP,IGF2R,LRP2,POMC,PTGER4,PTH,PTHLH,RAMP3,REPS1,SCT,SCTR,SYT1,SYT9,TF,TFRC,WNT5A
215	Insulinoma	C0021670	9	157	1.06968e-06	5.55556e-05	ADCYAP1,CALCA,CRHR1,EGF,GCG,GCGR,GIP,IAPP,PTHLH
216	Verotoxigenic Escherichia coli gastrointestinal tract infection	C0009450	26	1111	1.09014e-06	5.5814e-05	ADM,ADRB2,APOB,CALCA,CBL,CD4,CRH,CRHR1,CTTN,DNM2,EGFR,HRH2,IGF2R,LDLR,M6PR,POMC,PTGER2,PTGER4,PTH1R,PTHLH,SH3KBP1,SYT1,TSHR,VIP,VIPR1,WNT5A
217	Congestive heart failure	C0018802	21	782	1.11723e-06	5.60724e-05	ADM,ADM2,ADRB1,ADRB2,ADRB3,ARRB1,ARRB2,AVP,AVPR2,BIN1,CALCR,CTTN,DNM2,EGFR,FZD4,GPBAR1,HTR4,POMC,SCARB2,TF,TFRC
218	Stress, Psychological	C0038443	6	63	1.12162e-06	5.63307e-05	ADCYAP1R1,ADRB1,ADRB2,AVP,CRH,CRHR1
219	Adrenal hyperplasia	C0342492	6	63	1.12162e-06	5.65891e-05	CRH,CYP3A4,GIP,GNAS,MC2R,POMC
220	Rhabdomyosarcoma alveolar	C0035412	14	381	1.13234e-06	5.68475e-05	AP2A1,ARPC5,ARRB1,CLTC,CLTCL1,EGF,EGFR,IAPP,MC1R,PTH,PTHLH,SYNJ1,SYT1,TFRC
221	Major depressive disorder	C1269683	16	489	1.20029e-06	5.71059e-05	ADCYAP1,ADCYAP1R1,ADRB1,ADRB3,AVP,CHRM2,CRH,CRHR1,EGF,EGFR,HTR4,HTR6,M6PR,MC2R,POMC,VAMP2
222	Ovarian Failure, Premature	C0085215	10	199	1.25432e-06	5.73643e-05	CYP3A4,CYP3A5,FSHB,FSHR,GHRH,IGF2R,LHB,LHCGR,POMC,TSHB
223	Mental disorders	C0004936	15	439	1.35643e-06	5.76227e-05	ADCYAP1,ADCYAP1R1,CALCA,CHRM2,CRH,CRHR1,DRD5,FZD4,GPBAR1,HTR7,KIAA0319,POMC,PTH,SCT,VIP
224	Irritable bowel syndrome with diarrhea	C0022104	9	162	1.42339e-06	5.78811e-05	CRH,CRHR1,GCG,GPBAR1,HTR4,HTR7,NPSR1,POMC,VIP
225	body mass	C0518010	7	94	1.49321e-06	5.81395e-05	ADRB1,ADRB2,ADRB3,CALCR,GCGR,IAPP,POMC
226	{Unipolar depression, susceptibility to}, 608516 (3)	C0011570	17	555	1.55295e-06	5.83979e-05	ADCYAP1R1,ADRB2,AP2B1,APOB,AVP,CHRM2,CRH,CRHR1,DVL2,EGFR,FSHR,HGS,HTR4,HTR6,HTR7,POMC,TF
227	Sleep Wake Disorders	C0851578	7	95	1.6186e-06	5.86563e-05	ADRB2,ADRB3,CRH,GHRH,GHRHR,HTR7,POMC
231	Thyroid hormone receptor defect	C2940786	4	25	2.02162e-06	5.96899e-05	GHRH,GNAS,PTH,TSHR
232	Neoplasm of the colon	C0009375	21	817	2.28042e-06	5.99483e-05	ADCYAP1,ADCYAP1R1,ADM,ADRB3,BIN1,CALCA,CTTN,EGF,EGFR,GCG,GNAS,HIP1,HRH2,POMC,PTH,PTH1R,PTHLH,SH3KBP1,SNX9,SYT1,WNT5A
233	Anorexia	C0003123	8	134	2.40627e-06	6.02067e-05	AVPR2,CRH,CRHR1,HTR4,IAPP,NPSR1,POMC,SCARB2
234	Abdominal obesity	C0311277	8	134	2.40627e-06	6.04651e-05	ADRB2,ADRB3,APOB,GIP,GNAS,LDLR,POMC,TFRC
235	Hyperglycemia	C0020456	15	459	2.41e-06	6.07235e-05	ADM,ADORA2B,ADRB1,ADRB3,APOB,AVP,GCG,GCGR,GIP,GIPR,IAPP,POMC,PTH,SYT1,TFRC
245	Recurrent major depressive episodes	C0154409	4	26	2.48558e-06	6.33075e-05	AVP,CHRM2,CRH,CRHR1
246	Chronic Fatigue Syndrome	C0015674	5	46	2.57467e-06	6.35659e-05	CRHR1,HTR4,HTR6,HTR7,POMC
247	Diabetes Mellitus, Type 1	C0011849	38	2081	2.69432e-06	6.38243e-05	ADCYAP1,ADM,ADORA2B,ADRB1,ADRB2,ADRB3,AGFG1,APOB,AVP,CALCA,CHRM2,CRH,CYP3A4,CYP3A5,DNM2,EGFR,GCG,GCGR,GHRH,GHRHR,GIP,GIPR,GNAS,GPBAR1,IAPP,INSL3,LDLR,LRP2,MC3R,POMC,PTGER4,PTH,PTHLH,RAMP2,SYT1,TF,TFRC,VAMP4
248	Melanocytic nevus of skin	C3665593	5	47	2.93053e-06	6.40827e-05	CRH,EGF,LRP2,MC1R,POMC
249	Congenital adrenal hyperplasia	C0001627	6	74	3.36897e-06	6.43411e-05	AVPR2,CRH,GIP,HTR4,MC2R,POMC
254	Adrenal Gland Hyperfunction	C0001622	4	28	3.66221e-06	6.56331e-05	EGF,EGFR,MC2R,POMC
255	Hyperthyroidism	C0020550	8	141	3.66453e-06	6.58915e-05	ADRB2,APOB,GNAS,LDLR,PTH,SYT1,TSHB,TSHR
256	Abnormality of skeletal maturation	C4025818	11	268	3.72076e-06	6.61499e-05	FSHB,FSHR,GHRHR,LHCGR,MC2R,POMC,PTH1R,SCARB2,TSHR,VAMP7,WNT5A
257	Hypercalciuria	C0020438	6	76	4.03391e-06	6.64083e-05	AP2S1,LRP2,OCRL,POMC,PTH,PTH1R
258	Familial hypercholesterolemia	C0020445	9	182	4.05749e-06	6.66667e-05	ADRB1,ADRB2,ADRB3,APOB,EGF,EGFR,LDLR,LDLRAP1,POMC
259	Preeclampsia/eclampsia 1	C0032914	13	371	4.23664e-06	6.69251e-05	ADM,ADORA2B,ADRB2,ADRB3,APOB,CALCA,CRH,CRHR1,EGF,FSHR,IGF2R,PTGER2,PTGER4
260	Carcinoid tumor	C0007095	9	183	4.26031e-06	6.71835e-05	CALCA,EGF,EGFR,GHRH,POMC,PTH,PTHLH,SCT,SCTR
261	Femur Head Necrosis	C0015814	4	29	4.3944e-06	6.74419e-05	APOB,CYP3A4,POMC,TF
263	Premature Birth	C0151526	13	376	4.93848e-06	6.79587e-05	ADRB2,APOB,CRH,CRHR1,FZD4,IGF2R,POMC,PTGER2,PTGER4,PTH1R,RLN2,RLN3,TSHR
264	Chronic obstructive pulmonary disease	C0024117	21	865	5.67447e-06	6.82171e-05	ADM,ADORA2B,ADRB1,ADRB2,ADRB3,APOB,CALCR,CD4,CGA,CRHR1,CYP3A5,EGF,EGFR,HTR4,IGF2R,LDLR,PTH,TF,TFRC,VIP,VIPR1
265	Substance addiction and disorders	C0038580	6	80	5.69456e-06	6.84755e-05	AVP,CHRM2,CRHR1,DRD5,GCG,POMC
266	Abnormality of skeletal physiology	C4023164	14	436	5.86916e-06	6.87339e-05	FSHB,FSHR,FZD4,GHRHR,GNAS,LHCGR,MC2R,OCRL,POMC,PTH1R,SCARB2,TSHR,VAMP7,WNT5A
267	Epilepsy	C0014544	18	673	5.92936e-06	6.89922e-05	ARPC2,CALCA,CHRM2,CYP2C8,CYP3A4,CYP3A5,DNAJC6,HIP1,IAPP,KIAA0319,MC3R,POMC,PTH,REPS1,SCARB2,SYT1,VAMP2,WASL
268	Primary hyperparathyroidism	C0221002	5	53	6.00337e-06	6.92506e-05	ADM,AP2S1,CALCA,PTH,PTHLH
269	Bradycardia	C0428977	5	53	6.00337e-06	6.9509e-05	CHRM2,CRH,GCG,LHB,POMC
279	Hypercalcemia, infantile, 2	C0020437	7	114	6.37799e-06	7.2093e-05	AP2S1,CALCA,CALCR,EGFR,PTH,PTH1R,PTHLH
280	Ovarian Diseases	C0029928	10	236	6.49982e-06	7.23514e-05	ADRB2,ADRB3,CGA,FSHR,GNAS,GPR83,LHCGR,POMC,PTH,TFRC
283	Gastrinoma	C0017150	4	32	7.29768e-06	7.31266e-05	EGF,EGFR,SCT,SCTR
284	Diabetes insipidus	C0011848	5	55	7.47367e-06	7.3385e-05	AVP,AVPR2,OCRL,POMC,UBB
285	Disorders of Intracellular Cobalamin Metabolism	C0025517	13	394	8.39923e-06	7.36434e-05	ADRB2,ADRB3,AVP,CYP3A4,DNM2,FSHR,GCG,GIP,GNAS,GPBAR1,KIAA0319,LDLR,PTH
286	Hypothyroidism	C0020676	12	341	8.41326e-06	7.39018e-05	ADRB2,APOB,CD4,FSHR,GHRHR,GIP,GNAS,LDLR,POMC,TF,TSHB,TSHR
287	Abnormality of the parathyroid physiology	C4023198	5	57	9.22308e-06	7.41602e-05	AP2S1,GNAS,OCRL,PTH,PTH1R
288	Familial type 3 hyperlipoproteinemia	C0020479	4	34	9.94436e-06	7.44186e-05	APOB,CYP3A4,IAPP,LDLR
294	Antisocial Personality Disorder	C0003431	4	35	1.15213e-05	7.5969e-05	AVP,DRD5,HGS,POMC
306	Ischemia	C0022116	17	647	1.27997e-05	7.90698e-05	ADCYAP1,ADM,ADORA2B,ADRB2,ADRB3,APOB,AVP,CALCA,CALCRL,CYP2C8,EGF,FZD4,GPBAR1,POMC,SYT1,TF,VIP
307	Sparse pubic hair	C1858573	4	36	1.32868e-05	7.93282e-05	FSHB,FSHR,LHB,VAMP7
308	Abnormality of the pubic hair	C4022288	4	36	1.32868e-05	7.95866e-05	FSHB,FSHR,LHB,VAMP7
309	Bone neoplasms	C0005967	6	91	1.34008e-05	7.9845e-05	CALCA,EGFR,GNAS,IGF2R,PTHLH,SYT1
310	Cataracts, growth hormone deficiency, sensory neuropathy, sensorineural hearing loss, and skeletal dysplasia	C0271561	6	91	1.34008e-05	8.01034e-05	APOB,CYP3A4,GHRH,GHRHR,GNAS,POMC
311	Skin nodule	C0037287	6	92	1.44002e-05	8.03618e-05	APOB,GNAS,LDLR,MC1R,OCRL,PTH1R
314	Vascular Calcification	C0342649	5	62	1.50786e-05	8.1137e-05	APOB,GRK6,LDLR,LDLRAP1,PTH
315	Acute postoperative pain	C0030201	4	37	1.52565e-05	8.13953e-05	ADRB2,CALCA,CYP3A4,POMC
316	Hypotension	C0020649	7	129	1.58321e-05	8.16537e-05	ADM,AVP,CRH,GCG,POMC,PTGER4,VIP
317	Parkinson Disease	C0030567	19	789	1.61617e-05	8.19121e-05	AAK1,AVP,CALCA,CRHR1,DNAJC6,DRD5,EGF,GAK,GRK6,HIP1R,HTR6,IGF2R,MC1R,PICALM,POMC,SCARB2,SH3GL2,SYNJ1,TF
318	Bronchial Hyperreactivity	C0085129	8	170	1.66731e-05	8.21705e-05	ADRB2,CALCA,CRHR1,EGFR,NPSR1,PTGDR,PTGER4,VIP
319	alcohol use disorder	C0001956	4	38	1.74463e-05	8.24289e-05	AVP,CRH,CRHR1,NPSR1
320	Abnormality of the parathyroid gland	C4025822	5	64	1.81302e-05	8.26873e-05	AP2S1,GNAS,OCRL,PTH,PTH1R
323	Hypoglycemia, neonatal, simulating foetopathia diabetica	C0020615	10	265	1.92458e-05	8.34625e-05	ADRB2,AGFG1,CRH,CYP2C8,GCG,GCGR,GHRH,GHRHR,MC2R,POMC
324	Depressive Disorder	C0011581	15	543	1.96682e-05	8.37209e-05	ADCYAP1R1,ADRB2,AP2B1,AVP,CHRM2,CRH,CRHR1,DRD5,EGFR,FSHR,GNB1,HGS,HTR4,HTR7,POMC
325	Autism 15	C0004352	20	868	1.96918e-05	8.39793e-05	ADM,ADRB2,AVP,CALCA,CALCRL,CGA,EGF,FSHB,HIP1,HTR4,HTR6,HTR7,KIAA0319,LHB,LHCGR,POMC,SCT,TF,VIP,VIPR1
326	Primary hyperaldosteronism	C1384514	5	65	1.98325e-05	8.42377e-05	AVP,FZD4,GPBAR1,LHCGR,POMC
327	Myotubular myopathy	C0175709	4	39	1.98733e-05	8.44961e-05	AMPH,BIN1,DNM2,WASL
328	Nevus	C0497388	8	174	2.00599e-05	8.47545e-05	CGA,CRH,EGF,EGFR,LRP2,MC1R,POMC,WNT5A
329	Acute myocardial ischemia	C0151744	14	484	2.0098e-05	8.50129e-05	ADM2,ADORA2B,ADRB1,ADRB2,ADRB3,APOB,CYP3A4,IAPP,LDLR,POMC,RAB5A,RAMP2,RLN3,TFRC
330	Rheumatoid arthritis	C0003873	33	1856	2.08142e-05	8.52713e-05	ADM,ADRB2,ADRB3,AGFG1,APOB,ARRB1,CALCRL,CD3G,CD4,CGA,CLTA,CRH,CRHR1,CYP3A5,DNAJC6,EGF,EGFR,GPR15,GRK6,LDLR,LRP2,NPSR1,PICALM,POMC,PTGER2,PTGER4,PTHLH,RAMP2,SYT1,TF,VIP,VIPR1,WNT5A
340	Osteoarthritis	C0029408	21	942	2.12381e-05	8.78553e-05	ADM,CALCA,CALCRL,CRH,CRHR1,EGF,FZD4,GNAS,GPBAR1,OCRL,PTGER2,PTGER4,PTH,PTH1R,PTH2R,PTHLH,SCARB2,SYT1,VIP,VIPR2,WNT5A
341	Drug Dependence	C1510472	5	66	2.16612e-05	8.81137e-05	AVP,CHRM2,CRHR1,GCG,POMC
342	Acute Coronary Syndrome	C0948089	11	320	2.2089e-05	8.83721e-05	ADRB1,ADRB2,ADRB3,APOB,ARPC1A,CYP3A4,CYP3A5,EGFR,LDLR,PICALM,PTGER2
347	Acute kidney injury	C0022660	10	270	2.28672e-05	8.96641e-05	ADCYAP1,ADRB2,AGFG1,AVP,CYP3A4,CYP3A5,EGF,EGFR,LRP2,PTGER4
348	Cystitis	C0010692	6	100	2.48363e-05	8.99225e-05	ADCYAP1,ADCYAP1R1,POMC,PTGER4,SYT1,VIP
349	Rickets	C0035579	4	41	2.55098e-05	9.01809e-05	LRP2,OCRL,PTH,PTH1R
350	Hyperandrogenism, nonclassic type, due to 21-hydroxylase deficiency, 201910 (3)	C0206081	5	68	2.57261e-05	9.04393e-05	ADRB3,FSHR,INSL3,LHCGR,POMC
351	Pancreatic Neoplasms	C0030297	18	750	2.67308e-05	9.06977e-05	ADM,ADRB2,ARPC1A,DAB2,DNM2,EGF,EGFR,GHRH,GNAS,IGF2R,LDLR,MC1R,PTH1R,PTHLH,SCT,SCTR,TSHR,WNT5A
352	Plaque, Atherosclerotic	C0011389	9	226	2.68389e-05	9.09561e-05	APOB,CALCA,GIP,IAPP,LDLR,LRP2,TF,UBB,WNT5A
353	Testicular Neoplasms	C0039590	7	139	2.71836e-05	9.12145e-05	CYP3A4,EGF,EGFR,FSHR,GNAS,LHCGR,VAMP7
354	Cardiovascular Diseases	C0007222	22	1029	2.72086e-05	9.14729e-05	ADM,ADRB1,ADRB2,ADRB3,APOB,AVP,CGA,CYP2C8,CYP3A5,EGF,GCG,GIP,GIPR,LDLR,MC3R,PTGER2,PTGIR,PTH,SGIP1,SH3GL2,TF,VAMP8
355	Giant cell tumor of bone	C0206638	5	69	2.79767e-05	9.17313e-05	CALCA,CALCR,EGF,EGFR,PTHLH
356	Obesity, Visceral	C2936179	4	42	2.87566e-05	9.19897e-05	ADRB3,APOB,FSHR,POMC
357	Acromegaly	C0001206	5	70	3.0383e-05	9.22481e-05	ARRB1,GHRH,GHRHR,GNAS,PTH
358	Wiskott-Aldrich syndrome, 301000 (3)	C0043194	5	70	3.0383e-05	9.25065e-05	ACTR2,ACTR3,CTTN,DNM2,WASL
359	Vitamin D Deficiency	C0042870	4	43	3.23151e-05	9.27649e-05	LDLR,LRP2,OCRL,PTH
360	MAJOR AFFECTIVE DISORDER 4	C1970943	5	71	3.29527e-05	9.30233e-05	CRH,DRD5,HIP1R,HTR7,VAMP7
361	MAJOR AFFECTIVE DISORDER 5	C1970944	5	71	3.29527e-05	9.32817e-05	CRH,DRD5,HIP1R,HTR7,VAMP7
362	MAJOR AFFECTIVE DISORDER 6	C1970945	5	71	3.29527e-05	9.35401e-05	CRH,DRD5,HIP1R,HTR7,VAMP7
363	Major affective disorder 7	C2700438	5	71	3.29527e-05	9.37984e-05	CRH,DRD5,HIP1R,HTR7,VAMP7
364	MAJOR AFFECTIVE DISORDER 8	C2700439	5	71	3.29527e-05	9.40568e-05	CRH,DRD5,HIP1R,HTR7,VAMP7
365	MAJOR AFFECTIVE DISORDER 9	C2700440	5	71	3.29527e-05	9.43152e-05	CRH,DRD5,HIP1R,HTR7,VAMP7
375	Pathologic fracture	C0016663	4	44	3.62057e-05	9.68992e-05	GNAS,OCRL,PTH1R,SCARB2
376	Neurodegenerative Diseases	C0524851	17	706	4.03207e-05	9.71576e-05	ADCYAP1,ADRB2,CRHR1,DNM2,EGFR,FZD4,GCG,GPBAR1,KIAA0319,LDLR,MGST1,MGST3,SCARB2,SCT,TF,UBB,VIP
377	Somatotroph adenoma	C0346302	4	45	4.04495e-05	9.7416e-05	GHRH,GHRHR,GNAS,POMC
381	Arteriosclerosis	C0003850	22	1059	4.23572e-05	9.84496e-05	ADM,ADRB1,ADRB2,APOB,CYP2C8,CYP3A4,EGF,EGFR,GCG,GHRHR,GIP,HGS,HRH2,LDLR,LDLRAP1,PTGIR,PTH,PTHLH,RAMP1,TFRC,VAMP8,WNT5A
388	Nephrocalcinosis	C0027709	5	76	4.85471e-05	0.000100258	LRP2,OCRL,POMC,PTH,PTH1R
389	Chorioamnionitis	C0008495	8	195	4.90525e-05	0.000100517	ADM,ADRB2,ADRB3,APOB,CRHR1,IGF2R,PTGER2,PTGER4
390	Weight Gain Adverse Event	C2911647	7	151	4.91159e-05	0.000100775	ADRB2,ADRB3,DRD5,HRH2,HTR4,HTR6,HTR7
396	Carcinogenesis	C0596263	53	3723	5.07384e-05	0.000102326	ADCYAP1,ADM,ADRB2,AP2A1,AVP,CALCA,CALCR,CBL,CLTC,CRH,CRHR1,CTTN,CYP2C8,CYP3A4,CYP3A5,DAB2,DNM2,EGF,EGFR,FSHR,FZD4,GHRH,GHRHR,GNAS,GPBAR1,GRB2,HIP1,IAPP,IGF2R,INSL3,ITSN1,LDLR,LHCGR,MC1R,MC2R,MGST1,POMC,PTGDR,PTGER4,PTH,PTH2,PTHLH,RAB5A,RAMP1,SH3GL2,SNX9,SYT1,TFRC,TRIP10,TSHR,VIP,VIPR1,WNT5A
397	Unipolar Depression	C0041696	12	406	5.19102e-05	0.000102584	ADRB1,ADRB3,AVP,CHRM2,CRH,CRHR1,EGF,EGFR,HTR4,HTR6,POMC,VAMP2
398	Ichthyosis bullosa of Siemens	C0432306	5	77	5.22774e-05	0.000102842	CRHR1,GPBAR1,NPSR1,POMC,VIP
399	Renal insufficiency	C1565489	11	351	5.41786e-05	0.000103101	ADM,AVPR2,CYP3A4,CYP3A5,GCG,GIP,LDLR,OCRL,PTH,SCARB2,SCT
400	Nicotine Dependence	C0028043	6	113	5.45603e-05	0.000103359	ARRB1,ARRB2,CHRM2,CRH,CRHR1,DRD5
401	Neck Neoplasms	C0027533	4	48	5.5522e-05	0.000103618	CTTN,EGFR,IAPP,MC1R
402	Bile duct cancer resectable	C0740277	4	48	5.5522e-05	0.000103876	APOB,EGFR,LDLR,SCTR
403	Abnormality of secondary sexual hair	C4024171	4	48	5.5522e-05	0.000104134	FSHB,FSHR,LHB,VAMP7
404	Flushing	C0016382	3	25	5.72155e-05	0.000104393	AVP,PTGDR,VIP
405	Akinesia	C0085623	3	25	5.72155e-05	0.000104651	DNAJC6,DNM2,SYNJ1
406	Oligospermia	C0028960	7	155	5.90958e-05	0.00010491	APOB,CGA,EGF,FSHB,FSHR,INSL3,LHCGR
407	Hyperinsulinemia	C0020459	11	355	6.03787e-05	0.000105168	ADRB2,ADRB3,APOB,GCG,GIP,LDLR,MC3R,POMC,PTH,TFRC,VAMP8
408	Panic disorder syndrome 1 (2)	C0030319	6	115	6.1012e-05	0.000105426	AVP,CRH,CRHR1,DRD5,NPS,NPSR1
409	Abnormality of divalent inorganic cation homeostasis	C4023648	6	115	6.1012e-05	0.000105685	AP2S1,EGF,GNAS,OCRL,PTH,PTH1R
410	Rous Sarcoma	C0086942	4	49	6.14037e-05	0.000105943	EGF,LDLR,RPS27A,UBC
411	Abnormality of head blood vessel	C4073244	4	49	6.14037e-05	0.000106202	APOB,FZD4,LDLR,LDLRAP1
412	Gastric ulcer	C0038358	6	116	6.44642e-05	0.00010646	ADM,ADRB3,CYP2C8,EGF,EGFR,IAPP
413	Nephrolithiasis	C0392525	6	116	6.44642e-05	0.000106718	AP2S1,CALCR,CYP3A5,GNAS,OCRL,PTH
414	Substance Withdrawal Syndrome	C0038587	5	80	6.48628e-05	0.000106977	AVP,CRH,GNAS,HRH2,POMC
415	Down Syndrome	C0013080	13	476	6.67939e-05	0.000107235	ADRB2,AMPH,CALCA,CGA,ITSN1,PICALM,RAB5A,SYNJ1,SYT1,TSHR,UBB,VIP,VIPR1
416	Achalasia	C0014848	3	26	6.71664e-05	0.000107494	POMC,VIP,VIPR1
417	Abnormality of the hypothalamus-pituitary axis	C4025819	9	252	6.72057e-05	0.000107752	AVP,FSHB,FSHR,GHRHR,GNAS,LHCGR,POMC,TSHR,VAMP7
418	Myocardial Infarction	C0027051	21	1019	6.83286e-05	0.00010801	ADM,ADRB1,ADRB2,ADRB3,APOB,CHRM2,CYP2C8,CYP3A4,CYP3A5,DAB2,GCG,GHRH,IGF2R,LDLR,LDLRAP1,P2RY11,PTGER2,RAMP1,RLN2,TF,VAMP8
419	Multiple Endocrine Neoplasia Type 1	C0025267	5	81	6.95567e-05	0.000108269	GCG,GHRH,GNAS,POMC,PTH
425	Abnormality of the endocrine system	C4025823	19	878	7.19378e-05	0.000109819	AP2S1,AVP,AVPR2,FSHB,FSHR,GHRHR,GNAS,LHB,LHCGR,MC2R,OCRL,POMC,PTH,PTH1R,SCARB2,TF,TSHB,TSHR,VAMP7
518	Cancer of mouth	C0153381	12	420	7.3128e-05	0.00013385	ADM,AVP,CYP3A4,CYP3A5,EGF,EGFR,IGF2R,PTH,PTHLH,SYT1,TFRC,VIP
519	Accelerated skeletal maturation	C0545053	4	51	7.46001e-05	0.000134109	LHCGR,MC2R,PTH1R,TSHR
520	Amyotrophic Lateral Sclerosis	C0002736	18	812	7.72017e-05	0.000134367	AAK1,ADCYAP1,ADRB2,ADRB3,AMPH,APOB,DNM2,EGF,EGFR,GHRHR,IGF2R,LDLR,POMC,PTGER2,RAB5A,SYT1,VIP,WNT5A
521	granulosa cell tumor	C0018206	5	83	7.97569e-05	0.000134625	EGF,EGFR,FSHR,FZD4,LHCGR
522	Precocious puberty	C0034013	6	120	7.99087e-05	0.000134884	GHRH,GNAS,IGF2R,LHCGR,POMC,PTH1R
523	Pain insensitivity	C0344307	4	52	8.19658e-05	0.000135142	CYP3A4,CYP3A5,MC1R,POMC
524	Abnormality of phosphate homeostasis	C4022032	4	52	8.19658e-05	0.000135401	GNAS,OCRL,PTH,PTH1R
525	Colitis, Ulcerative	C0009319	16	679	8.26517e-05	0.000135659	ADM,ADRB3,ARRB1,CALCA,CRHR1,EGF,EGFR,GCG,GLP2R,GPR15,HTR7,PICALM,PTGER4,SYT1,TFRC,VIP
526	Thyroid Neoplasms	C0040136	13	486	8.32508e-05	0.000135917	CALCA,EGF,EGFR,GNAS,IGF2R,INSL3,MC1R,PTH,PTH1R,RLN2,TF,TSHR,WNT5A
527	Chronic heart failure	C0264716	5	84	8.52852e-05	0.000136176	ADM,ADM2,ADORA2B,ADRB1,ADRB2
528	Depressive Symptoms	C0086132	6	122	8.86919e-05	0.000136434	ADRB2,AP2B1,CRH,CRHR1,CYP3A4,SYNJ2
529	Azoospermia	C0004509	9	261	8.98849e-05	0.000136693	APOB,CYP3A4,FSHB,FSHR,GCG,IAPP,OCRL,VAMP7,WASL
530	Multiple Endocrine Neoplasia Type 2b	C0025269	3	28	9.07638e-05	0.000136951	CALCA,EGF,EGFR
531	Ectopic calcification	C3806226	7	166	9.55781e-05	0.000137209	AP2S1,APOB,GNAS,LDLR,LDLRAP1,PTH,PTH1R
546	Thyroid Diseases	C0040128	11	376	0.000104015	0.000141085	CALCA,FSHR,GNAS,INSL3,LRP2,POMC,PTGER4,TF,TGOLN2,TSHB,TSHR
547	Hypothermia	C0020672	3	29	0.000104583	0.000141344	GCG,LHB,TSHB
548	Aortic atherosclerosis	C0155733	3	29	0.000104583	0.000141602	APOB,LDLR,LDLRAP1
549	Hereditary pancreatitis	C0238339	11	377	0.000106638	0.00014186	ADCYAP1,ADM,ADRB2,EGF,EGFR,GCG,GIP,MGST1,PTHLH,SCT,SYT1
550	Mitral regurgitation	C0026266	5	88	0.000110526	0.000142119	ADRB2,APOB,CBL,LDLR,LDLRAP1
551	Ulcerative colitis	C0009324	18	837	0.000114545	0.000142377	ADRB2,ARPC2,CALCA,CRH,CRHR1,CYP3A4,CYP3A5,DAB2,DNM2,EGFR,GLP2R,GPBAR1,GPR15,NPSR1,PTGER4,PTGIR,SYT1,VIPR1
552	Squamous cell carcinoma	C0007137	31	1855	0.000116398	0.000142636	ADM,ADRB2,AP2A1,AP2M1,CALCA,CD4,CRH,CTTN,CYP3A4,CYP3A5,DAB2,EGF,EGFR,FZD4,GHRH,GNAS,GPBAR1,IGF2R,MC1R,MGST1,PICALM,PIK3C2A,POMC,PTGDR,PTHLH,SH3KBP1,SYT1,TFRC,TRIP10,VIPR1,WNT5A
553	Multiple endocrine neoplasia, type 4	C0027662	4	56	0.000117175	0.000142894	CALCA,GNAS,POMC,PTH
554	Nodular goiter	C1318500	3	30	0.000119867	0.000143152	CALCA,GNAS,TSHR
555	Isolated somatotropin deficiency	C3714796	3	30	0.000119867	0.000143411	GHRH,GHRHR,POMC
556	Malignant tumor of urinary bladder	C0005684	25	1371	0.000124026	0.000143669	ADM,AGFG1,APOB,CALCR,CD4,CGA,CTTN,CYP3A4,CYP3A5,DAB2,EGF,EGFR,FZD4,GNAS,GRB2,IAPP,IGF2R,LDLR,PTH,REPS1,RPS27A,SYT1,TFRC,UBC,WNT5A
557	Tumor Angiogenesis	C1519670	12	443	0.000124392	0.000143928	ADM,ADM2,ARRB1,CTTN,DAB2,EGF,EGFR,FZD4,GPBAR1,PTGER2,PTHLH,WNT5A
558	Optic neuropathy	C0029132	4	57	0.000127555	0.000144186	APOB,EGFR,LDLR,LDLRAP1
559	Neurologic, endocrine, and pancreatic disease, multisystem, infantile-onset	C0030286	4	57	0.000127555	0.000144444	AVP,GIP,POMC,SCT
560	Glucocorticoid resistance, generalized	C1841972	4	57	0.000127555	0.000144703	ADRB2,CYP3A5,POMC,SYT1
566	Adenocarcinoma, ovarian, somatic, 167000 (3)	C0001418	29	1700	0.000130919	0.000146253	ADM,ADORA2B,ADRB2,ARRB2,AVP,CALCA,CRHR1,CTTN,CYP3A4,EGF,EGFR,GCG,GHRH,GHRHR,GIP,GNAS,IGF2R,PTGER2,PTGER4,PTHLH,RAMP2,SCT,SCTR,SYT1,TRIP10,UBC,VIP,VIPR1,WNT5A
567	Hyponatremia	C0020625	3	31	0.000136706	0.000146512	AVP,AVPR2,OCRL
568	Musculoskeletal Diseases	C0026857	6	132	0.000145213	0.00014677	ADRB2,CRH,CRHR1,POMC,PTGER2,TSHR
