# Supplementary material for: Beta-2 adrenergic receptor agonism alters astrocyte phagocytic activity and has potential applications to psychiatric disease
Source: Research Square preprint supplement (doi:10.21203/rs.3.rs-2086278/v1), 2022-10-25
Supplement: Supplementary file 7 [file 54f3201dce414369641acb8d.xlsx]

## Sheet: Increase
Gene Names	Regression Coefficients
ABCB1	0.726952
SLC22A4	0.350725
CYP3A5	0.264175
DRD4	0.225189
POMC	0.219851
F2R	0.171626
ADRA2A	0.165431
ADRA2B	0.165431
ADRA2C	0.165431
YWHAZ	0.163381
AR	0.163381
YWHAB	0.163381
CYFIP1	0.163381
CDC42	0.163381
MAPK3	0.163381
MAPK1	0.157776
ANXA1	0.151886
GNAI2	0.150385
MET	0.134167
TYROBP	0.134167
NRG2	0.134167
NRG1	0.134167
ERBB3	0.134167
LCK	0.134167
FGF1	0.134167
CD28	0.134167
PIK3CA	0.134167
CSF2RB	0.134167
BTC	0.134167
FGFR2	0.134167
FGFR1	0.134167
PIK3CD	0.134167
ERBB4	0.134167
PDGFRB	0.134167
ACTR2	0.1312
KIAA0319	0.1312
APOB	0.1312
ARRB2	0.1312
CLTB	0.1312
DNM2	0.1312
SH3GL2	0.1312
STON2	0.1312
PIK3C2A	0.1312
VAMP2	0.1312
TF	0.1312
DNAJC6	0.1312
AVP	0.129699
PIK3CB	0.129011
IRS1	0.129011
CHRM4	0.125304
CHRM2	0.124274
FYN	0.113992
CHRM5	0.105136
EGF	0.101985
HSP90AA1	0.0813335
GRB2	0.066845
AKT1	0.0599954
GSN	0.0529983
PRSS3	0.0529983
HP	0.0529983
JARID2	0.0529983
APOE	0.0529983
SLC1A5	0.0529983
CACNA1I	0.0529983
GFAP	0.0529983
SCAF1	0.0529983
CNOT1	0.0529983
ITIH1	0.0529983
HTR1F	0.0370761
HTR5A	0.0370761
NPS	0.0305341
NPSR1	0.0299066
CHRM1	0.0257715
DRD3	0.023124
HTR1A	0.0211996
CCK	0.00824431
HCRT	0.00824431
TAC1	0.00824431
NTSR1	0.00824431
NTS	0.00824431
P2RY1	0.00824431
AVPR1A	0.00824431
TACR3	0.00824431
OXTR	0.00824431
CYSLTR2	0.00824431
ADRA1A	0.00824431
HRH1	0.00824431
GRP	0.00824431
GRM1	0.00824431
HCRTR1	0.00824431
CCKAR	0.00824431
CCKBR	0.00824431
GRM5	0.00824431
OXT	0.00824431
TACR1	0.00824431
P2RY2	0.00824431
ADRA1D	0.00824431
NMB	0.00824431
EDNRA	0.00263905
GHRL	0.00263905
HNMT	0
FABP3	0
ARSA	0
GRIK2	0
FABP4	0
PMP2	0
GC	0
FABP7	0
PLA2G2A	0
SIRT5	0
GP1BB	0
GABRA1	-0.000178984
CACNA1A	-0.000627536
GNAL	-0.00150129
PDE4A	-0.00150129
MC4R	-0.00212883
HDAC2	-0.00317586
RIT2	-0.00515612
KCNQ3	-0.00515612
KCNQ2	-0.00515612
NTRK1	-0.00515612
KIDINS220	-0.00515612
NGF	-0.00515612
NTRK2	-0.00515612
HSPA5	-0.00560526
PML	-0.00560526
RPS6KA3	-0.00560526
PTGS2	-0.00560526
PTGS1	-0.00560526
CDKN2A	-0.00560526
GRIA3	-0.00570222
CHRNA4	-0.00608096
CHRNB2	-0.00608096
CHRNA7	-0.00608096
CHRNA3	-0.00608096
GRM3	-0.00692598
GLUL	-0.00765012
CTNNB1	-0.00787635
CSNK1D	-0.00787635
AHI1	-0.00787635
TUBB4B	-0.00787635
PCM1	-0.00787635
PCNT	-0.00787635
WNT1	-0.00787635
CDC25C	-0.00787635
SDCCAG8	-0.00787635
CDK5	-0.00787635
CDK5R1	-0.00787635
NDE1	-0.00787635
GSK3B	-0.00787635
CSNK1E	-0.00787635
CDC25A	-0.00787635
RPGRIP1L	-0.00787635
UBE2D1	-0.00787635
TUBA1A	-0.00787635
TUBB	-0.00787635
YWHAG	-0.00787635
YWHAE	-0.00787635
APC	-0.00787635
PLXNA2	-0.00787635
PAFAH1B1	-0.00787635
CYP1A2	-0.00954736
SMPD1	-0.00962465
MAP3K8	-0.00998698
NFKB1	-0.00998698
RELA	-0.00998698
RIPK2	-0.00998698
REL	-0.00998698
MAOB	-0.0105104
SIGMAR1	-0.0112371
NOS1	-0.0118264
NOS3	-0.0118264
NOS2	-0.0118264
GNAO1	-0.0118646
COMT	-0.0122614
CACNA1B	-0.0127486
TYR	-0.0127938
SRD5A2	-0.0127938
GRIA2	-0.0135825
GRIA4	-0.0135825
PRKCG	-0.0135825
PRKCA	-0.0135825
GRIP1	-0.0135825
GRIA1	-0.0135825
NQO2	-0.0140512
TH	-0.0140512
GSTP1	-0.016031
UGT1A4	-0.0163091
FMO3	-0.0163091
HTR3A	-0.0164881
CALY	-0.0166679
OPRM1	-0.0181631
KCNH2	-0.0187506
EPHB2	-0.0201751
GRIN2B	-0.0201751
EFNB1	-0.0201751
GRIN1	-0.0201751
EFNB2	-0.0201751
HTR1D	-0.0207577
DDC	-0.0238045
GRIN3A	-0.0240178
CACNA1C	-0.0264001
HTR1B	-0.0279136
KDM4A	-0.0292145
UBE2I	-0.0292145
TIMELESS	-0.0292145
BRCA2	-0.0292145
RPA1	-0.0292145
H2AFX	-0.0292145
KAT5	-0.0292145
ADCY7	-0.0307158
ADORA2A	-0.03116
CYP2D6	-0.0313513
TP53	-0.0348197
GRM2	-0.0366341
PNOC	-0.0366341
GRM7	-0.0366341
C3	-0.0366341
MCHR1	-0.0366341
PDYN	-0.0366341
HCAR3	-0.0366341
ADORA1	-0.0366341
CXCR6	-0.0366341
SSTR4	-0.0366341
NPY	-0.0366341
NPY1R	-0.0366341
CNR2	-0.0366341
PTGER3	-0.0366341
CCR5	-0.0366341
MTNR1A	-0.0366341
MTNR1B	-0.0366341
ACKR3	-0.0366341
MCHR2	-0.0366341
SST	-0.0366341
CNR1	-0.0366341
CXCL8	-0.0366341
OPRK1	-0.0366341
GRM8	-0.0366341
HCAR2	-0.0366341
HRH3	-0.0366341
GRM4	-0.0366341
SSTR5	-0.0366341
HRH4	-0.0366341
UBE2N	-0.0392015
SNAP25	-0.0395775
PAH	-0.0395775
STXBP1	-0.0395775
SLC18A2	-0.0395775
STX1A	-0.0395775
CPLX1	-0.0395775
DRD1	-0.0401662
SLC6A3	-0.0493001
GABBR2	-0.0501784
APOA1	-0.0510722
APOC3	-0.0510722
DICER1	-0.0510722
MYL4	-0.0510722
CFB	-0.0510722
FN1	-0.0510722
DMD	-0.0510722
TTR	-0.0510722
PLA2G4A	-0.059346
PLA2G4C	-0.059346
NFATC3	-0.0623453
PPP3CA	-0.0623453
PPP3R1	-0.0623453
CYP3A4	-0.0652651
UGT1A3	-0.0724933
GNB1	-0.0773097
PALB2	-0.0802867
PDE4B	-0.081788
SOS1	-0.0825203
CAMK2A	-0.0825203
GRIN2C	-0.0825203
GRIN2D	-0.0825203
GRIN2A	-0.0825203
NEFL	-0.0825203
DLG4	-0.0825203
CAMK2B	-0.0825203
ATM	-0.088163
SLC6A4	-0.0907044
CALM3	-0.0943467
GABBR1	-0.0959009
LPAR2	-0.113376
DRD5	-0.117348
SLC6A2	-0.130282
ADCYAP1	-0.136337
CRHR1	-0.136337
VIP	-0.136337
ADM	-0.136337
CRH	-0.136337
ADCYAP1R1	-0.136965
MC2R	-0.136965
HTR4	-0.136965
GIPR	-0.136965
HRH2	-0.136965
HTR6	-0.136965
TAAR1	-0.136965
GNAS	-0.136965
MC5R	-0.136965
ADRB3	-0.136965
HTR7	-0.136965
VIPR2	-0.136965
APP	-0.139669
ANKK1	-0.145425
DRD2	-0.145425
HTR2C	-0.160194
CYP2B6	-0.176788
CYP2E1	-0.187832
HTR2A	-0.200686
CYP2C19	-0.209154

## Sheet: Decrease
Gene Names	Regression Coefficients
GSTP1	0.490383
HTR2C	0.459315
CHRM5	0.395503
NPSR1	0.380997
SLC22A4	0.349309
CYP3A4	0.311828
COMT	0.302596
CYP2C19	0.287791
NPS	0.262132
ANKK1	0.249775
DRD2	0.249775
GABBR1	0.241405
MC4R	0.228996
CYP2B6	0.199496
DRD5	0.197277
HTR1A	0.180864
CALY	0.177012
MC2R	0.157009
ADCYAP1R1	0.157009
HTR6	0.157009
ADRB3	0.157009
HRH2	0.157009
GNAS	0.157009
VIPR2	0.157009
HTR7	0.157009
GIPR	0.157009
TAAR1	0.157009
HTR4	0.157009
MC5R	0.157009
CHRM1	0.15555
GRB2	0.132226
CACNA1A	0.118865
GNAL	0.110131
PDE4A	0.110131
GRIN2A	0.102336
GRIN2D	0.102336
SOS1	0.102336
NEFL	0.102336
DLG4	0.102336
CAMK2A	0.102336
GRIN2C	0.102336
CAMK2B	0.102336
SMPD1	0.0954139
GRM3	0.092958
YWHAE	0.0851431
WNT1	0.0851431
RPGRIP1L	0.0851431
CDK5R1	0.0851431
TUBA1A	0.0851431
CDC25A	0.0851431
PAFAH1B1	0.0851431
CDC25C	0.0851431
YWHAG	0.0851431
TUBB	0.0851431
AHI1	0.0851431
TUBB4B	0.0851431
UBE2D1	0.0851431
NDE1	0.0851431
PCNT	0.0851431
GSK3B	0.0851431
CDK5	0.0851431
SDCCAG8	0.0851431
CSNK1D	0.0851431
CSNK1E	0.0851431
CTNNB1	0.0851431
PCM1	0.0851431
PLXNA2	0.0851431
APC	0.0851431
CHRM4	0.0811739
ADCY7	0.0773041
SLC6A4	0.0749755
DRD1	0.0713937
C3	0.0616204
PDYN	0.0616204
OPRK1	0.0616204
HRH3	0.0616204
GRM7	0.0616204
ADORA1	0.0616204
SST	0.0616204
HCAR2	0.0616204
GRM2	0.0616204
SSTR5	0.0616204
GRM4	0.0616204
NPY	0.0616204
GRM8	0.0616204
HRH4	0.0616204
CXCL8	0.0616204
HCAR3	0.0616204
PNOC	0.0616204
NPY1R	0.0616204
CCR5	0.0616204
CXCR6	0.0616204
CNR2	0.0616204
ACKR3	0.0616204
MCHR2	0.0616204
CNR1	0.0616204
MTNR1B	0.0616204
SSTR4	0.0616204
PTGER3	0.0616204
MTNR1A	0.0616204
MCHR1	0.0616204
GNAO1	0.059411
EFNB2	0.0592394
GRIN1	0.0592394
EPHB2	0.0592394
EFNB1	0.0592394
GRIN2B	0.0592394
SLC6A2	0.0485779
GNB1	0.048358
NFATC3	0.043097
PPP3R1	0.043097
PPP3CA	0.043097
VIP	0.0381433
CRHR1	0.0381433
CRH	0.0381433
ADCYAP1	0.0381433
ADM	0.0381433
OPRM1	0.0335037
LPAR2	0.0242315
PDE4B	0.012047
CALM3	0.00658566
PMP2	0
FABP3	0
GP1BB	0
FABP7	0
FABP4	0
GC	0
ARSA	0
HNMT	0
SIRT5	0
GRIK2	0
PLA2G2A	0
GRIN3A	-0.00335933
PLA2G4A	-0.00434898
PLA2G4C	-0.00434898
PRSS3	-0.00889235
APOE	-0.00889235
ITIH1	-0.00889235
SCAF1	-0.00889235
CNOT1	-0.00889235
GFAP	-0.00889235
CACNA1I	-0.00889235
SLC1A5	-0.00889235
JARID2	-0.00889235
HP	-0.00889235
GSN	-0.00889235
CDKN2A	-0.00889882
PTGS2	-0.00889882
PTGS1	-0.00889882
PML	-0.00889882
HSPA5	-0.00889882
RPS6KA3	-0.00889882
UGT1A3	-0.012258
ATM	-0.0129407
CYP2E1	-0.0167755
GABBR2	-0.0168772
HDAC2	-0.0191485
CYSLTR2	-0.0256501
CCKBR	-0.0256501
NMB	-0.0256501
TACR3	-0.0256501
HCRTR1	-0.0256501
AVPR1A	-0.0256501
ADRA1D	-0.0256501
TACR1	-0.0256501
ADRA1A	-0.0256501
HCRT	-0.0256501
HRH1	-0.0256501
NTSR1	-0.0256501
GRM5	-0.0256501
P2RY2	-0.0256501
OXTR	-0.0256501
GRM1	-0.0256501
NTS	-0.0256501
TAC1	-0.0256501
CCK	-0.0256501
GRP	-0.0256501
P2RY1	-0.0256501
CCKAR	-0.0256501
OXT	-0.0256501
HSP90AA1	-0.0263569
CPLX1	-0.0263976
SLC18A2	-0.0263976
PAH	-0.0263976
SNAP25	-0.0263976
STXBP1	-0.0263976
STX1A	-0.0263976
NTRK1	-0.0275947
NGF	-0.0275947
RIT2	-0.0275947
KCNQ2	-0.0275947
NTRK2	-0.0275947
KCNQ3	-0.0275947
KIDINS220	-0.0275947
CYP2D6	-0.0306617
AVP	-0.0315839
CHRNB2	-0.0318596
CHRNA3	-0.0318596
CHRNA4	-0.0318596
CHRNA7	-0.0318596
FYN	-0.0324335
KAT5	-0.0328267
RPA1	-0.0328267
KDM4A	-0.0328267
TIMELESS	-0.0328267
UBE2I	-0.0328267
BRCA2	-0.0328267
H2AFX	-0.0328267
GHRL	-0.0345489
EDNRA	-0.0345489
CACNA1B	-0.0394572
TP53	-0.0417255
CHRM2	-0.0487567
AR	-0.0588463
YWHAZ	-0.0588463
CDC42	-0.0588463
MAPK3	-0.0588463
YWHAB	-0.0588463
CYFIP1	-0.0588463
SIGMAR1	-0.0594543
DICER1	-0.0652571
CFB	-0.0652571
TTR	-0.0652571
APOC3	-0.0652571
APOA1	-0.0652571
FN1	-0.0652571
MYL4	-0.0652571
DMD	-0.0652571
GRIA3	-0.0672974
MAPK1	-0.0677451
GLUL	-0.0680339
MAOB	-0.0701964
F2R	-0.0844964
ERBB3	-0.091673
FGFR2	-0.091673
PIK3CD	-0.091673
LCK	-0.091673
NRG1	-0.091673
CD28	-0.091673
FGFR1	-0.091673
ERBB4	-0.091673
PDGFRB	-0.091673
CSF2RB	-0.091673
BTC	-0.091673
MET	-0.091673
PIK3CA	-0.091673
TYROBP	-0.091673
NRG2	-0.091673
FGF1	-0.091673
APP	-0.0937233
NOS3	-0.0957508
NOS2	-0.0957508
NOS1	-0.0957508
PALB2	-0.0980838
CYP3A5	-0.109115
PIK3CB	-0.119268
IRS1	-0.119268
PRKCG	-0.120597
GRIA2	-0.120597
GRIP1	-0.120597
PRKCA	-0.120597
GRIA4	-0.120597
GRIA1	-0.120597
TYR	-0.130036
SRD5A2	-0.130036
HTR1F	-0.133783
HTR5A	-0.133783
GABRA1	-0.135915
PIK3C2A	-0.141715
ARRB2	-0.141715
CLTB	-0.141715
DNM2	-0.141715
STON2	-0.141715
TF	-0.141715
KIAA0319	-0.141715
APOB	-0.141715
ACTR2	-0.141715
DNAJC6	-0.141715
SH3GL2	-0.141715
VAMP2	-0.141715
AKT1	-0.144327
NQO2	-0.156601
TH	-0.156601
REL	-0.162213
NFKB1	-0.162213
RELA	-0.162213
MAP3K8	-0.162213
RIPK2	-0.162213
CYP1A2	-0.172319
UGT1A4	-0.172963
FMO3	-0.172963
EGF	-0.174541
UBE2N	-0.19504
POMC	-0.20685
HTR2A	-0.210048
DDC	-0.2116
ADORA2A	-0.214704
DRD3	-0.235097
GNAI2	-0.247699
HTR1D	-0.253027
ADRA2A	-0.279332
ADRA2B	-0.279332
ADRA2C	-0.279332
CACNA1C	-0.302093
HTR3A	-0.308878
ANXA1	-0.35783
ABCB1	-0.440489
HTR1B	-0.486671
KCNH2	-0.492792
DRD4	-0.57605
SLC6A3	-0.731466

## Sheet: No Effect
Gene Names	Regression Coefficients
SLC6A3	0.780766
HTR1B	0.514585
KCNH2	0.511543
HTR2A	0.410735
DRD4	0.350861
CACNA1C	0.328493
HTR3A	0.325366
HTR1D	0.273784
ADORA2A	0.245864
DDC	0.235404
UBE2N	0.234241
APP	0.233392
DRD3	0.211973
ANXA1	0.205943
CYP2E1	0.204608
UGT1A4	0.189272
FMO3	0.189272
CYP1A2	0.181866
PALB2	0.178371
REL	0.1722
MAP3K8	0.1722
RELA	0.1722
RIPK2	0.1722
NFKB1	0.1722
NQO2	0.170652
TH	0.170652
TYR	0.14283
SRD5A2	0.14283
GABRA1	0.136094
PRKCA	0.13418
PRKCG	0.13418
GRIA2	0.13418
GRIA1	0.13418
GRIA4	0.13418
GRIP1	0.13418
FN1	0.116329
APOA1	0.116329
TTR	0.116329
MYL4	0.116329
DMD	0.116329
DICER1	0.116329
CFB	0.116329
APOC3	0.116329
ADRA2B	0.113902
ADRA2C	0.113902
ADRA2A	0.113902
NOS2	0.107577
NOS1	0.107577
NOS3	0.107577
ATM	0.101104
CRH	0.0981941
CRHR1	0.0981941
ADM	0.0981941
VIP	0.0981941
ADCYAP1	0.0981941
GNAI2	0.0973139
HTR1F	0.0967074
HTR5A	0.0967074
LPAR2	0.0891445
CALM3	0.0877611
UGT1A3	0.0847512
AKT1	0.0843314
SLC6A2	0.081704
MAOB	0.0807068
TP53	0.0765453
GLUL	0.075684
GRIA3	0.0729997
EGF	0.072556
SIGMAR1	0.0706913
PDE4B	0.069741
GABBR2	0.0670556
SLC18A2	0.0659751
STX1A	0.0659751
STXBP1	0.0659751
CPLX1	0.0659751
SNAP25	0.0659751
PAH	0.0659751
PLA2G4C	0.0636949
PLA2G4A	0.0636949
TIMELESS	0.0620412
KDM4A	0.0620412
KAT5	0.0620412
H2AFX	0.0620412
UBE2I	0.0620412
BRCA2	0.0620412
RPA1	0.0620412
CYP2D6	0.062013
CACNA1B	0.0522058
CHRNA4	0.0379405
CHRNA7	0.0379405
CHRNA3	0.0379405
CHRNB2	0.0379405
NTRK1	0.0327508
RIT2	0.0327508
KCNQ2	0.0327508
NGF	0.0327508
KIDINS220	0.0327508
KCNQ3	0.0327508
NTRK2	0.0327508
GHRL	0.0319099
EDNRA	0.0319099
GNB1	0.0289517
GRIN3A	0.0273772
HDAC2	0.0223243
PPP3R1	0.0192482
NFATC3	0.0192482
PPP3CA	0.0192482
CYSLTR2	0.0174058
OXTR	0.0174058
NTSR1	0.0174058
HCRT	0.0174058
ADRA1D	0.0174058
OXT	0.0174058
TACR3	0.0174058
NTS	0.0174058
GRM1	0.0174058
NMB	0.0174058
CCKBR	0.0174058
CCK	0.0174058
P2RY2	0.0174058
TAC1	0.0174058
HCRTR1	0.0174058
P2RY1	0.0174058
CCKAR	0.0174058
GRM5	0.0174058
GRP	0.0174058
ADRA1A	0.0174058
HRH1	0.0174058
AVPR1A	0.0174058
TACR1	0.0174058
SLC6A4	0.0157289
RPS6KA3	0.0145041
PTGS1	0.0145041
PML	0.0145041
PTGS2	0.0145041
CDKN2A	0.0145041
HSPA5	0.0145041
ACTR2	0.0105148
PIK3C2A	0.0105148
CLTB	0.0105148
SH3GL2	0.0105148
STON2	0.0105148
DNAJC6	0.0105148
DNM2	0.0105148
APOB	0.0105148
TF	0.0105148
KIAA0319	0.0105148
ARRB2	0.0105148
VAMP2	0.0105148
GP1BB	0
GRIK2	0
GC	0
FABP3	0
PMP2	0
ARSA	0
SIRT5	0
HNMT	0
PLA2G2A	0
FABP7	0
FABP4	0
PIK3CB	-0.00974321
IRS1	-0.00974321
POMC	-0.0130011
OPRM1	-0.0153407
GRIN2D	-0.0198161
NEFL	-0.0198161
DLG4	-0.0198161
SOS1	-0.0198161
CAMK2B	-0.0198161
GRIN2A	-0.0198161
CAMK2A	-0.0198161
GRIN2C	-0.0198161
HTR6	-0.0200436
HTR4	-0.0200436
TAAR1	-0.0200436
MC2R	-0.0200436
GIPR	-0.0200436
GNAS	-0.0200436
HRH2	-0.0200436
VIPR2	-0.0200436
MC5R	-0.0200436
ADCYAP1R1	-0.0200436
HTR7	-0.0200436
ADRB3	-0.0200436
CYP2B6	-0.0227088
HRH4	-0.0249863
ADORA1	-0.0249863
PTGER3	-0.0249863
SSTR5	-0.0249863
C3	-0.0249863
GRM2	-0.0249863
MTNR1B	-0.0249863
PDYN	-0.0249863
CCR5	-0.0249863
MTNR1A	-0.0249863
CXCL8	-0.0249863
GRM4	-0.0249863
NPY1R	-0.0249863
SST	-0.0249863
GRM7	-0.0249863
NPY	-0.0249863
MCHR1	-0.0249863
CNR1	-0.0249863
HCAR3	-0.0249863
OPRK1	-0.0249863
CXCR6	-0.0249863
PNOC	-0.0249863
SSTR4	-0.0249863
HRH3	-0.0249863
CNR2	-0.0249863
HCAR2	-0.0249863
GRM8	-0.0249863
ACKR3	-0.0249863
MCHR2	-0.0249863
DRD1	-0.0312274
GRIN2B	-0.0390643
EFNB1	-0.0390643
EFNB2	-0.0390643
EPHB2	-0.0390643
GRIN1	-0.0390643
PIK3CA	-0.042494
FGFR1	-0.042494
MET	-0.042494
TYROBP	-0.042494
NRG2	-0.042494
ERBB3	-0.042494
NRG1	-0.042494
FGFR2	-0.042494
ERBB4	-0.042494
PDGFRB	-0.042494
FGF1	-0.042494
BTC	-0.042494
LCK	-0.042494
PIK3CD	-0.042494
CD28	-0.042494
CSF2RB	-0.042494
GSN	-0.044106
CNOT1	-0.044106
ITIH1	-0.044106
HP	-0.044106
CACNA1I	-0.044106
GFAP	-0.044106
SLC1A5	-0.044106
PRSS3	-0.044106
SCAF1	-0.044106
JARID2	-0.044106
APOE	-0.044106
ADCY7	-0.0465883
GNAO1	-0.0475464
HSP90AA1	-0.0549766
CHRM2	-0.0755172
CDK5	-0.0772668
CTNNB1	-0.0772668
SDCCAG8	-0.0772668
TUBB	-0.0772668
CDC25C	-0.0772668
CSNK1D	-0.0772668
PCM1	-0.0772668
GSK3B	-0.0772668
PCNT	-0.0772668
CSNK1E	-0.0772668
UBE2D1	-0.0772668
CDC25A	-0.0772668
WNT1	-0.0772668
PLXNA2	-0.0772668
TUBB4B	-0.0772668
YWHAG	-0.0772668
APC	-0.0772668
AHI1	-0.0772668
RPGRIP1L	-0.0772668
TUBA1A	-0.0772668
NDE1	-0.0772668
PAFAH1B1	-0.0772668
CDK5R1	-0.0772668
YWHAE	-0.0772668
CYP2C19	-0.0786363
DRD5	-0.0799283
FYN	-0.0815584
SMPD1	-0.0857892
GRM3	-0.086032
F2R	-0.0871294
MAPK1	-0.0900311
AVP	-0.0981147
ANKK1	-0.10435
DRD2	-0.10435
CDC42	-0.104535
CYFIP1	-0.104535
AR	-0.104535
MAPK3	-0.104535
YWHAZ	-0.104535
YWHAB	-0.104535
GNAL	-0.10863
PDE4A	-0.10863
CACNA1A	-0.118238
GABBR1	-0.145504
CYP3A5	-0.15506
CALY	-0.160345
CHRM1	-0.181322
GRB2	-0.19907
HTR1A	-0.202063
CHRM4	-0.206478
MC4R	-0.226867
CYP3A4	-0.246563
ABCB1	-0.286462
COMT	-0.290335
NPS	-0.292666
HTR2C	-0.299121
NPSR1	-0.410903
GSTP1	-0.474353
CHRM5	-0.500639
SLC22A4	-0.700033
