# Supplementary material for: Beta-2 adrenergic receptor agonism alters astrocyte phagocytic activity and has potential applications to psychiatric disease
Source: Research Square preprint supplement (doi:10.21203/rs.3.rs-2086278/v1), 2022-10-25
Supplement: Supplementary file 8 [file 6f8ee91630da2c4796dd04b7.xlsx]

## Sheet: SF6_Mabuterol_GOPROCESS
GO Term	Description	P-value	FDR q-value	Enrichment	N	B	n	b	Genes
GO:0007187	G protein-coupled receptor signaling pathway, coupled to cyclic nucleotide second messenger	8.56e-16	8.58e-12	10.8	1824	80	38	18	[ADCYAP1R1 - adenylate cyclase activating polypeptide 1 (pituitary) receptor type i, DRD5 - dopamine receptor d5, GNB1 - guanine nucleotide binding protein (g protein), beta polypeptide 1, ADCYAP1 - adenylate cyclase activating polypeptide 1 (pituitary), ADRB3 - adrenoceptor beta 3, GNAS - gnas complex locus, VIP - vasoactive intestinal peptide, VIPR2 - vasoactive intestinal peptide receptor 2, H…
GO:0007186	G protein-coupled receptor signaling pathway	2.01e-15	1.01e-11	5.61	1824	214	38	25	[DRD5 - dopamine receptor d5, ADRB3 - adrenoceptor beta 3, ARRB2 - arrestin, beta 2, HTR4 - 5-hydroxytryptamine (serotonin) receptor 4, g protein-coupled, CHRM2 - cholinergic receptor, muscarinic 2, HRH2 - histamine receptor h2, HTR7 - 5-hydroxytryptamine (serotonin) receptor 7, adenylate cyclase-coupled, HTR6 - 5-hydroxytryptamine (serotonin) receptor 6, g protein-coupled, TAAR1 - trace amine as…
GO:0007188	adenylate cyclase-modulating G protein-coupled receptor signaling pathway	6.07e-13	2.03e-09	10.59	1824	68	38	15	[ADCYAP1R1 - adenylate cyclase activating polypeptide 1 (pituitary) receptor type i, DRD5 - dopamine receptor d5, ADCYAP1 - adenylate cyclase activating polypeptide 1 (pituitary), GNB1 - guanine nucleotide binding protein (g protein), beta polypeptide 1, ADRB3 - adrenoceptor beta 3, GNAS - gnas complex locus, VIP - vasoactive intestinal peptide, VIPR2 - vasoactive intestinal peptide receptor 2, H…
GO:0007189	adenylate cyclase-activating G protein-coupled receptor signaling pathway	2.88e-10	7.22e-07	14.55	1824	33	38	10	[CRHR1 - corticotropin releasing hormone receptor 1, DRD5 - dopamine receptor d5, ADM - adrenomedullin, ADCYAP1 - adenylate cyclase activating polypeptide 1 (pituitary), GNB1 - guanine nucleotide binding protein (g protein), beta polypeptide 1, ADRB3 - adrenoceptor beta 3, VIP - vasoactive intestinal peptide, GNAS - gnas complex locus, MC2R - melanocortin 2 receptor (adrenocorticotropic hormone),…
GO:0019933	cAMP-mediated signaling	1.02e-09	2.05e-06	12.97	1824	37	38	10	[CRHR1 - corticotropin releasing hormone receptor 1, DRD5 - dopamine receptor d5, ADM - adrenomedullin, ADCYAP1 - adenylate cyclase activating polypeptide 1 (pituitary), GNB1 - guanine nucleotide binding protein (g protein), beta polypeptide 1, ADRB3 - adrenoceptor beta 3, VIP - vasoactive intestinal peptide, GNAS - gnas complex locus, MC2R - melanocortin 2 receptor (adrenocorticotropic hormone),…
GO:0019935	cyclic-nucleotide-mediated signaling	2.39e-09	3.99e-06	12	1824	40	38	10	[CRHR1 - corticotropin releasing hormone receptor 1, DRD5 - dopamine receptor d5, ADM - adrenomedullin, ADCYAP1 - adenylate cyclase activating polypeptide 1 (pituitary), GNB1 - guanine nucleotide binding protein (g protein), beta polypeptide 1, ADRB3 - adrenoceptor beta 3, VIP - vasoactive intestinal peptide, GNAS - gnas complex locus, MC2R - melanocortin 2 receptor (adrenocorticotropic hormone),…
GO:0061024	membrane organization	4.03e-09	5.76e-06	5.41	1824	142	38	16	[DNAJC6 - dnaj (hsp40) homolog, subfamily c, member 6, DNM2 - dynamin 2, TF - transferrin, ARRB2 - arrestin, beta 2, APOB - apolipoprotein b, STON2 - stonin 2, CHRM2 - cholinergic receptor, muscarinic 2, GRB2 - growth factor receptor-bound protein 2, PIK3C2A - phosphatidylinositol-4-phosphate 3-kinase, catalytic subunit type 2 alpha, AVP - arginine vasopressin, CLTB - clathrin, light chain b, EGF…
GO:0007165	signal transduction	7.4e-09	9.27e-06	2.09	1824	759	38	33	[DRD5 - dopamine receptor d5, TF - transferrin, ADRB3 - adrenoceptor beta 3, ARRB2 - arrestin, beta 2, APOB - apolipoprotein b, HTR4 - 5-hydroxytryptamine (serotonin) receptor 4, g protein-coupled, CHRM2 - cholinergic receptor, muscarinic 2, GRB2 - growth factor receptor-bound protein 2, HRH2 - histamine receptor h2, HTR7 - 5-hydroxytryptamine (serotonin) receptor 7, adenylate cyclase-coupled, TA…
GO:0007190	activation of adenylate cyclase activity	1.26e-06	0.00141	21.82	1824	11	38	5	[CRHR1 - corticotropin releasing hormone receptor 1, DRD5 - dopamine receptor d5, GIPR - gastric inhibitory polypeptide receptor, ADCYAP1 - adenylate cyclase activating polypeptide 1 (pituitary), ADRB3 - adrenoceptor beta 3]
GO:0006897	endocytosis	2.21e-06	0.00221	5.39	1824	98	38	11	[STON2 - stonin 2, DNAJC6 - dnaj (hsp40) homolog, subfamily c, member 6, GRB2 - growth factor receptor-bound protein 2, PIK3C2A - phosphatidylinositol-4-phosphate 3-kinase, catalytic subunit type 2 alpha, CLTB - clathrin, light chain b, DNM2 - dynamin 2, ADM - adrenomedullin, VAMP2 - vesicle-associated membrane protein 2 (synaptobrevin 2), ARRB2 - arrestin, beta 2, SH3GL2 - sh3-domain grb2-like 2…
GO:0019932	second-messenger-mediated signaling	2.93e-06	0.00267	5.93	1824	81	38	10	[CRHR1 - corticotropin releasing hormone receptor 1, DRD5 - dopamine receptor d5, ADM - adrenomedullin, GNB1 - guanine nucleotide binding protein (g protein), beta polypeptide 1, ADCYAP1 - adenylate cyclase activating polypeptide 1 (pituitary), ADRB3 - adrenoceptor beta 3, GNAS - gnas complex locus, VIP - vasoactive intestinal peptide, MC2R - melanocortin 2 receptor (adrenocorticotropic hormone),…
GO:0006898	receptor-mediated endocytosis	1.09e-05	0.00906	8.4	1824	40	38	7	[DNAJC6 - dnaj (hsp40) homolog, subfamily c, member 6, GRB2 - growth factor receptor-bound protein 2, CLTB - clathrin, light chain b, ADM - adrenomedullin, DNM2 - dynamin 2, ARRB2 - arrestin, beta 2, APOB - apolipoprotein b]
GO:0010959	regulation of metal ion transport	2.05e-05	0.0158	4.8	1824	100	38	10	[CRHR1 - corticotropin releasing hormone receptor 1, CRH - corticotropin releasing hormone, DNM2 - dynamin 2, NPSR1 - neuropeptide s receptor 1, ADCYAP1 - adenylate cyclase activating polypeptide 1 (pituitary), TF - transferrin, EGF - epidermal growth factor, VIP - vasoactive intestinal peptide, VAMP2 - vesicle-associated membrane protein 2 (synaptobrevin 2), ARRB2 - arrestin, beta 2]
GO:0022414	reproductive process	2.39e-05	0.0171	3.57	1824	175	38	13	[ADCYAP1R1 - adenylate cyclase activating polypeptide 1 (pituitary) receptor type i, DRD5 - dopamine receptor d5, ADCYAP1 - adenylate cyclase activating polypeptide 1 (pituitary), DNM2 - dynamin 2, ARRB2 - arrestin, beta 2, APOB - apolipoprotein b, CRHR1 - corticotropin releasing hormone receptor 1, CRH - corticotropin releasing hormone, GRB2 - growth factor receptor-bound protein 2, AVP - argini…
GO:0098664	G protein-coupled serotonin receptor signaling pathway	2.82e-05	0.0188	12.63	1824	19	38	5	[HTR4 - 5-hydroxytryptamine (serotonin) receptor 4, g protein-coupled, CHRM2 - cholinergic receptor, muscarinic 2, HRH2 - histamine receptor h2, HTR7 - 5-hydroxytryptamine (serotonin) receptor 7, adenylate cyclase-coupled, HTR6 - 5-hydroxytryptamine (serotonin) receptor 6, g protein-coupled]
GO:2000852	regulation of corticosterone secretion	3.29e-05	0.0206	36	1824	4	38	3	[CRHR1 - corticotropin releasing hormone receptor 1, CRH - corticotropin releasing hormone, POMC - proopiomelanocortin]
GO:0050880	regulation of blood vessel size	4.36e-05	0.0257	6.86	1824	49	38	7	[HRH2 - histamine receptor h2, PIK3C2A - phosphatidylinositol-4-phosphate 3-kinase, catalytic subunit type 2 alpha, HTR7 - 5-hydroxytryptamine (serotonin) receptor 7, adenylate cyclase-coupled, DRD5 - dopamine receptor d5, AVP - arginine vasopressin, ADM - adrenomedullin, ADRB3 - adrenoceptor beta 3]
GO:0097746	regulation of blood vessel diameter	4.36e-05	0.0243	6.86	1824	49	38	7	[HRH2 - histamine receptor h2, PIK3C2A - phosphatidylinositol-4-phosphate 3-kinase, catalytic subunit type 2 alpha, HTR7 - 5-hydroxytryptamine (serotonin) receptor 7, adenylate cyclase-coupled, DRD5 - dopamine receptor d5, AVP - arginine vasopressin, ADM - adrenomedullin, ADRB3 - adrenoceptor beta 3]
GO:0035150	regulation of tube size	4.36e-05	0.023	6.86	1824	49	38	7	[HRH2 - histamine receptor h2, PIK3C2A - phosphatidylinositol-4-phosphate 3-kinase, catalytic subunit type 2 alpha, HTR7 - 5-hydroxytryptamine (serotonin) receptor 7, adenylate cyclase-coupled, DRD5 - dopamine receptor d5, AVP - arginine vasopressin, ADM - adrenomedullin, ADRB3 - adrenoceptor beta 3]
GO:0035296	regulation of tube diameter	4.36e-05	0.0219	6.86	1824	49	38	7	[HRH2 - histamine receptor h2, PIK3C2A - phosphatidylinositol-4-phosphate 3-kinase, catalytic subunit type 2 alpha, HTR7 - 5-hydroxytryptamine (serotonin) receptor 7, adenylate cyclase-coupled, DRD5 - dopamine receptor d5, AVP - arginine vasopressin, ADM - adrenomedullin, ADRB3 - adrenoceptor beta 3]
GO:0042310	vasoconstriction	4.77e-05	0.0228	17.45	1824	11	38	4	[PIK3C2A - phosphatidylinositol-4-phosphate 3-kinase, catalytic subunit type 2 alpha, DRD5 - dopamine receptor d5, HTR7 - 5-hydroxytryptamine (serotonin) receptor 7, adenylate cyclase-coupled, AVP - arginine vasopressin]
GO:0097756	negative regulation of blood vessel diameter	4.77e-05	0.0217	17.45	1824	11	38	4	[HTR7 - 5-hydroxytryptamine (serotonin) receptor 7, adenylate cyclase-coupled, DRD5 - dopamine receptor d5, PIK3C2A - phosphatidylinositol-4-phosphate 3-kinase, catalytic subunit type 2 alpha, AVP - arginine vasopressin]
GO:0098657	import into cell	4.83e-05	0.0211	3.94	1824	134	38	11	[STON2 - stonin 2, DNAJC6 - dnaj (hsp40) homolog, subfamily c, member 6, GRB2 - growth factor receptor-bound protein 2, PIK3C2A - phosphatidylinositol-4-phosphate 3-kinase, catalytic subunit type 2 alpha, CLTB - clathrin, light chain b, DNM2 - dynamin 2, ADM - adrenomedullin, VAMP2 - vesicle-associated membrane protein 2 (synaptobrevin 2), ARRB2 - arrestin, beta 2, SH3GL2 - sh3-domain grb2-like 2…
GO:0050794	regulation of cellular process	6.48e-05	0.0271	1.34	1824	1321	38	37	[DRD5 - dopamine receptor d5, TF - transferrin, ADRB3 - adrenoceptor beta 3, ARRB2 - arrestin, beta 2, APOB - apolipoprotein b, HTR4 - 5-hydroxytryptamine (serotonin) receptor 4, g protein-coupled, GRB2 - growth factor receptor-bound protein 2, CHRM2 - cholinergic receptor, muscarinic 2, HRH2 - histamine receptor h2, HTR7 - 5-hydroxytryptamine (serotonin) receptor 7, adenylate cyclase-coupled, AV…
GO:0003018	vascular process in circulatory system	6.49e-05	0.026	6.46	1824	52	38	7	[HRH2 - histamine receptor h2, PIK3C2A - phosphatidylinositol-4-phosphate 3-kinase, catalytic subunit type 2 alpha, HTR7 - 5-hydroxytryptamine (serotonin) receptor 7, adenylate cyclase-coupled, DRD5 - dopamine receptor d5, AVP - arginine vasopressin, ADM - adrenomedullin, ADRB3 - adrenoceptor beta 3]
GO:0090066	regulation of anatomical structure size	7.56e-05	0.0291	4.65	1824	93	38	9	[GRB2 - growth factor receptor-bound protein 2, HRH2 - histamine receptor h2, PIK3C2A - phosphatidylinositol-4-phosphate 3-kinase, catalytic subunit type 2 alpha, HTR7 - 5-hydroxytryptamine (serotonin) receptor 7, adenylate cyclase-coupled, DRD5 - dopamine receptor d5, AVP - arginine vasopressin, ADM - adrenomedullin, ADRB3 - adrenoceptor beta 3, ACTR2 - arp2 actin-related protein 2 homolog (yeas…
GO:0043950	positive regulation of cAMP-mediated signaling	8.12e-05	0.0301	28.8	1824	5	38	3	[CRH - corticotropin releasing hormone, GIPR - gastric inhibitory polypeptide receptor, ADCYAP1 - adenylate cyclase activating polypeptide 1 (pituitary)]
GO:0007210	serotonin receptor signaling pathway	9.55e-05	0.0342	10	1824	24	38	5	[HTR4 - 5-hydroxytryptamine (serotonin) receptor 4, g protein-coupled, CHRM2 - cholinergic receptor, muscarinic 2, HRH2 - histamine receptor h2, HTR7 - 5-hydroxytryptamine (serotonin) receptor 7, adenylate cyclase-coupled, HTR6 - 5-hydroxytryptamine (serotonin) receptor 6, g protein-coupled]
GO:0048259	regulation of receptor-mediated endocytosis	0.000107	0.0371	7.38	1824	39	38	6	[DNAJC6 - dnaj (hsp40) homolog, subfamily c, member 6, DNM2 - dynamin 2, EGF - epidermal growth factor, TF - transferrin, ARRB2 - arrestin, beta 2, SH3GL2 - sh3-domain grb2-like 2]
GO:0007218	neuropeptide signaling pathway	0.000118	0.0393	9.6	1824	25	38	5	[POMC - proopiomelanocortin, NPS - neuropeptide s, NPSR1 - neuropeptide s receptor 1, ADCYAP1 - adenylate cyclase activating polypeptide 1 (pituitary), MC2R - melanocortin 2 receptor (adrenocorticotropic hormone)]
GO:0044060	regulation of endocrine process	0.000138	0.0447	13.71	1824	14	38	4	[CRHR1 - corticotropin releasing hormone receptor 1, CRH - corticotropin releasing hormone, POMC - proopiomelanocortin, GNAS - gnas complex locus]
GO:2000849	regulation of glucocorticoid secretion	0.00016	0.0501	24	1824	6	38	3	[CRHR1 - corticotropin releasing hormone receptor 1, CRH - corticotropin releasing hormone, POMC - proopiomelanocortin]
GO:0002031	G protein-coupled receptor internalization	0.00016	0.0486	24	1824	6	38	3	[ADM - adrenomedullin, DNM2 - dynamin 2, ARRB2 - arrestin, beta 2]
GO:2000369	regulation of clathrin-dependent endocytosis	0.00016	0.0472	24	1824	6	38	3	[DNAJC6 - dnaj (hsp40) homolog, subfamily c, member 6, DNM2 - dynamin 2, SH3GL2 - sh3-domain grb2-like 2]
GO:0003013	circulatory system process	0.000166	0.0475	5.6	1824	60	38	7	[HRH2 - histamine receptor h2, PIK3C2A - phosphatidylinositol-4-phosphate 3-kinase, catalytic subunit type 2 alpha, HTR7 - 5-hydroxytryptamine (serotonin) receptor 7, adenylate cyclase-coupled, DRD5 - dopamine receptor d5, AVP - arginine vasopressin, ADM - adrenomedullin, ADRB3 - adrenoceptor beta 3]
GO:0007212	dopamine receptor signaling pathway	0.000186	0.0517	12.8	1824	15	38	4	[DRD5 - dopamine receptor d5, GNB1 - guanine nucleotide binding protein (g protein), beta polypeptide 1, GNAS - gnas complex locus, ARRB2 - arrestin, beta 2]
GO:0016192	vesicle-mediated transport	0.000199	0.0538	2.75	1824	244	38	14	[DNAJC6 - dnaj (hsp40) homolog, subfamily c, member 6, DNM2 - dynamin 2, TF - transferrin, ARRB2 - arrestin, beta 2, APOB - apolipoprotein b, STON2 - stonin 2, GRB2 - growth factor receptor-bound protein 2, PIK3C2A - phosphatidylinositol-4-phosphate 3-kinase, catalytic subunit type 2 alpha, CLTB - clathrin, light chain b, ADM - adrenomedullin, EGF - epidermal growth factor, ACTR2 - arp2 actin-rel…
GO:0046879	hormone secretion	0.000244	0.0644	12	1824	16	38	4	[CRHR1 - corticotropin releasing hormone receptor 1, ADM - adrenomedullin, ADCYAP1 - adenylate cyclase activating polypeptide 1 (pituitary), VIP - vasoactive intestinal peptide]
GO:2000831	regulation of steroid hormone secretion	0.000276	0.0709	20.57	1824	7	38	3	[CRHR1 - corticotropin releasing hormone receptor 1, CRH - corticotropin releasing hormone, POMC - proopiomelanocortin]
GO:2000846	regulation of corticosteroid hormone secretion	0.000276	0.0691	20.57	1824	7	38	3	[CRHR1 - corticotropin releasing hormone receptor 1, POMC - proopiomelanocortin, CRH - corticotropin releasing hormone]
GO:1901185	negative regulation of ERBB signaling pathway	0.000276	0.0675	20.57	1824	7	38	3	[GRB2 - growth factor receptor-bound protein 2, EGF - epidermal growth factor, SH3GL2 - sh3-domain grb2-like 2]
GO:0042059	negative regulation of epidermal growth factor receptor signaling pathway	0.000276	0.0659	20.57	1824	7	38	3	[GRB2 - growth factor receptor-bound protein 2, EGF - epidermal growth factor, SH3GL2 - sh3-domain grb2-like 2]
GO:0007191	adenylate cyclase-activating dopamine receptor signaling pathway	0.000276	0.0643	20.57	1824	7	38	3	[DRD5 - dopamine receptor d5, GNB1 - guanine nucleotide binding protein (g protein), beta polypeptide 1, GNAS - gnas complex locus]
GO:0065008	regulation of biological quality	0.000345	0.0787	1.7	1824	732	38	26	[DRD5 - dopamine receptor d5, TF - transferrin, ADRB3 - adrenoceptor beta 3, ARRB2 - arrestin, beta 2, APOB - apolipoprotein b, HTR4 - 5-hydroxytryptamine (serotonin) receptor 4, g protein-coupled, GRB2 - growth factor receptor-bound protein 2, HRH2 - histamine receptor h2, HTR7 - 5-hydroxytryptamine (serotonin) receptor 7, adenylate cyclase-coupled, AVP - arginine vasopressin, VAMP2 - vesicle-as…
GO:0050789	regulation of biological process	0.000392	0.0874	1.28	1824	1391	38	37	[DRD5 - dopamine receptor d5, TF - transferrin, ADRB3 - adrenoceptor beta 3, ARRB2 - arrestin, beta 2, APOB - apolipoprotein b, HTR4 - 5-hydroxytryptamine (serotonin) receptor 4, g protein-coupled, GRB2 - growth factor receptor-bound protein 2, CHRM2 - cholinergic receptor, muscarinic 2, HRH2 - histamine receptor h2, HTR7 - 5-hydroxytryptamine (serotonin) receptor 7, adenylate cyclase-coupled, AV…
GO:0009914	hormone transport	0.000398	0.0867	10.67	1824	18	38	4	[CRHR1 - corticotropin releasing hormone receptor 1, ADM - adrenomedullin, ADCYAP1 - adenylate cyclase activating polypeptide 1 (pituitary), VIP - vasoactive intestinal peptide]
GO:0002029	desensitization of G protein-coupled receptor signaling pathway	0.000423	0.0902	48	1824	2	38	2	[GIPR - gastric inhibitory polypeptide receptor, ARRB2 - arrestin, beta 2]
GO:0022401	negative adaptation of signaling pathway	0.000423	0.0883	48	1824	2	38	2	[GIPR - gastric inhibitory polypeptide receptor, ARRB2 - arrestin, beta 2]
GO:1903525	regulation of membrane tubulation	0.000423	0.0865	48	1824	2	38	2	[DNM2 - dynamin 2, SH3GL2 - sh3-domain grb2-like 2]
GO:0023058	adaptation of signaling pathway	0.000423	0.0848	48	1824	2	38	2	[GIPR - gastric inhibitory polypeptide receptor, ARRB2 - arrestin, beta 2]
GO:0008217	regulation of blood pressure	0.000442	0.0869	5.76	1824	50	38	6	[POMC - proopiomelanocortin, CRH - corticotropin releasing hormone, DRD5 - dopamine receptor d5, AVP - arginine vasopressin, ADM - adrenomedullin, ADRB3 - adrenoceptor beta 3]
GO:0035556	intracellular signal transduction	0.000533	0.103	2.39	1824	301	38	15	[DRD5 - dopamine receptor d5, ADCYAP1 - adenylate cyclase activating polypeptide 1 (pituitary), GNB1 - guanine nucleotide binding protein (g protein), beta polypeptide 1, TF - transferrin, ADRB3 - adrenoceptor beta 3, GNAS - gnas complex locus, VIP - vasoactive intestinal peptide, CRHR1 - corticotropin releasing hormone receptor 1, GRB2 - growth factor receptor-bound protein 2, PIK3C2A - phosphat…
GO:0007565	female pregnancy	0.000612	0.116	9.6	1824	20	38	4	[CRHR1 - corticotropin releasing hormone receptor 1, CRH - corticotropin releasing hormone, ADM - adrenomedullin, ADCYAP1 - adenylate cyclase activating polypeptide 1 (pituitary)]
GO:0070371	ERK1 and ERK2 cascade	0.000643	0.119	16	1824	9	38	3	[AVP - arginine vasopressin, EGF - epidermal growth factor, TF - transferrin]
GO:0140238	presynaptic endocytosis	0.000643	0.117	16	1824	9	38	3	[STON2 - stonin 2, VAMP2 - vesicle-associated membrane protein 2 (synaptobrevin 2), SH3GL2 - sh3-domain grb2-like 2]
GO:0048488	synaptic vesicle endocytosis	0.000643	0.115	16	1824	9	38	3	[STON2 - stonin 2, VAMP2 - vesicle-associated membrane protein 2 (synaptobrevin 2), SH3GL2 - sh3-domain grb2-like 2]
GO:0030100	regulation of endocytosis	0.000736	0.129	4.42	1824	76	38	7	[DNAJC6 - dnaj (hsp40) homolog, subfamily c, member 6, STON2 - stonin 2, DNM2 - dynamin 2, EGF - epidermal growth factor, TF - transferrin, ARRB2 - arrestin, beta 2, SH3GL2 - sh3-domain grb2-like 2]
GO:0031623	receptor internalization	0.000744	0.129	9.14	1824	21	38	4	[GRB2 - growth factor receptor-bound protein 2, ADM - adrenomedullin, DNM2 - dynamin 2, ARRB2 - arrestin, beta 2]
GO:0048260	positive regulation of receptor-mediated endocytosis	0.000896	0.152	8.73	1824	22	38	4	[DNM2 - dynamin 2, EGF - epidermal growth factor, TF - transferrin, ARRB2 - arrestin, beta 2]
GO:0007173	epidermal growth factor receptor signaling pathway	0.000906	0.151	14.4	1824	10	38	3	[GRB2 - growth factor receptor-bound protein 2, PIK3C2A - phosphatidylinositol-4-phosphate 3-kinase, catalytic subunit type 2 alpha, EGF - epidermal growth factor]
GO:0046883	regulation of hormone secretion	0.000932	0.153	4.25	1824	79	38	7	[CRHR1 - corticotropin releasing hormone receptor 1, POMC - proopiomelanocortin, CRH - corticotropin releasing hormone, GIPR - gastric inhibitory polypeptide receptor, ADCYAP1 - adenylate cyclase activating polypeptide 1 (pituitary), GNAS - gnas complex locus, VIP - vasoactive intestinal peptide]
