# Supplementary material for: Beta-2 adrenergic receptor agonism alters astrocyte phagocytic activity and has potential applications to psychiatric disease
Source: Research Square preprint supplement (doi:10.21203/rs.3.rs-2086278/v1), 2022-10-25
Supplement: Supplementary file 9 [file fe487dd6615c2d451ef75e98.xlsx]

## Sheet: Sheet1
Drug Bank ID	Name	ClusterLabel	Genes
DB00960	Pindolol	450	HTR1A,ACKR3,VAMP2,CYP2D6,ADRB3,ADRA2B,CNR2,NPY1R,STON2,GABBR1,ANXA1,SSTR4,PNOC,MC2R,ARRB2,CRH,DRD4,APOB,CXCR6,VIP,HCAR3,GNAS,APP,CNR1,DRD3,MCHR1,CLTB,DNM2,ADCYAP1,ADCYAP1R1,DRD5,GRM7,SST,PIK3C2A,DNAJC6,HTR1B,TAAR1,GNAI2,GRB2,GIPR,EGF,LPAR2,CXCL8,ADRA2C,NPY,NPSR1,GNB1,AVP,MC5R,OPRK1,SH3GL2,HRH3,HCAR2,ADM,GRM8,ACTR2,GRM4,CRHR1,HRH2,HRH4,SSTR5,CHRM2,GRM2,NPS,KIAA0319,POMC,HTR6,ADRA2A,TF,C3,PDYN,ADOR…
DB01080	Vigabatrin	451	GABBR1,ANXA1,APP,GNAI2,GNB1,POMC,GABBR2
DB00750	Prilocaine	451
DB01016	Glyburide	451
DB09242	Moxonidine	451
DB06693	Mevastatin	451
DB13251	Not Mapped	451
DB02116	Olomoucine	451	MAPK1,CDK5,YWHAE,RPGRIP1L,YWHAG,TUBB,PLXNA2,UBE2D1,CSNK1E,CYFIP1,SDCCAG8,PCNT,YWHAB,AHI1,TUBB4B,CDC25A,F2R,HSP90AA1,CDK5R1,NDE1,MAPK3,CDC25C,CSNK1D,PCM1,PAFAH1B1,TUBA1A,ATM
DB04223	Nitroarginine	451	NOS1,CALM3,AKT1,HSP90AA1,NOS3
DB04224	Oleic Acid	451	APOC3,APOA1,FABP7,FN1,DICER1,GABBR1,SLC1A5,CACNA1I,GSN,GFAP,JARID2,DMD,APOE,MYL4,PMP2,CNOT1,FABP3,PDE4B,FABP4,ITIH1,GC,PALB2,CFB,HP,SCAF1,PRSS3,TTR,ATM
DB12110	Not Mapped	451
DB14010	Not Mapped	451
DB14043	Not Mapped	451
DB12947	Not Mapped	451
DB00839	Tolazamide	451
DB01177	Idarubicin	451
DB05381	Histamine	452	HTR1A,ACKR3,CYP2D6,ADRB3,HCRTR1,NMB,TACR3,ADRA2B,CNR2,NPY1R,TAC1,GABBR1,ANXA1,SSTR4,PNOC,MC2R,CRH,DRD4,GRM1,GRP,CXCR6,VIP,HCAR3,GNAS,APP,CNR1,DRD3,MCHR1,ADCYAP1,ADCYAP1R1,DRD5,HTR1D,GRM7,SST,HRH1,ADRA1A,HTR1B,TAAR1,CCK,GNAI2,NTS,NTSR1,GIPR,HTR1F,LPAR2,GHRL,P2RY2,CXCL8,ADRA2C,NPY,NPSR1,GNB1,HTR5A,MC5R,OPRK1,HRH3,CHRM1,HCAR2,ADM,CHRM5,TACR1,GRM8,GRM4,F2R,CRHR1,HRH2,HRH4,SSTR5,OXTR,GRM2,NPS,P2RY1,PO…
DB00636	Clofibrate	451
DB00809	Tropicamide	452	HTR1A,ACKR3,VAMP2,HCRTR1,NMB,TACR3,ADRA2B,CNR2,NPY1R,STON2,TAC1,GABBR1,ANXA1,SSTR4,PNOC,ARRB2,DRD4,APOB,GRM1,GRP,CXCR6,HCAR3,APP,CNR1,DRD3,MCHR1,CLTB,DNM2,HTR1D,GRM7,SST,PIK3C2A,HRH1,ADRA1A,DNAJC6,HTR1B,CCK,GNAI2,NTS,GRB2,NTSR1,EGF,HTR1F,LPAR2,GHRL,P2RY2,CXCL8,ADRA2C,NPY,NPSR1,GNB1,AVP,HTR5A,OPRK1,SH3GL2,HRH3,CHRM1,HCAR2,TACR1,GRM8,ACTR2,GRM4,F2R,HRH4,SSTR5,CHRM2,OXTR,GRM2,NPS,P2RY1,KIAA0319,POMC…
DB00291	Chlorambucil	451
DB02999	Quisqualate	451	PRKCA,GRIA1,GRIK2,GRIA4,GRIP1,GRIA2,PRKCG
DB00328	Indomethacin	451
DB04786	Suramin	443	PLA2G4A,ADRB3,HCRTR1,NMB,TACR3,TAC1,SIRT5,MC2R,CRH,GRM1,GRP,VIP,PLA2G4C,GNAS,APP,ADCYAP1,ADCYAP1R1,DRD5,HRH1,ADRA1A,TAAR1,CCK,NTS,NTSR1,GIPR,LPAR2,GHRL,P2RY2,NPSR1,GNB1,MC5R,CHRM1,ADM,CHRM5,TACR1,ARSA,F2R,CRHR1,HRH2,OXTR,NPS,P2RY1,POMC,GRM5,CCKBR,OXT,PLA2G2A,HTR6,AVPR1A,CYSLTR2,HCRT,GP1BB,EDNRA,CCKAR,HTR4,ADRA1D,VIPR2,HTR7
DB01050	Ibuprofen	451
DB09203	Synephrine	451
DB03953	L-Thiocitrulline	451	NOS2
DB00765	Metyrosine	451	TH
DB00594	Amiloride	451
DB01412	Theobromine	450	ADORA2A,HTR1A,ACKR3,ADRB3,ADRA2B,CNR2,NPY1R,GABBR1,ANXA1,SSTR4,PNOC,MC2R,CRH,DRD4,CXCR6,VIP,HCAR3,SLC1A5,GNAS,APP,CNR1,CACNA1I,DRD3,MCHR1,ADCYAP1,ADCYAP1R1,DRD5,HTR1D,GSN,ADCY7,GRM7,SST,GFAP,HTR1B,TAAR1,GNAI2,GIPR,JARID2,HTR1F,LPAR2,APOE,CYP2E1,CXCL8,ADRA2C,NPY,NPSR1,GNB1,HTR5A,MC5R,OPRK1,HRH3,HCAR2,ADM,CNOT1,GRM8,PDE4B,GRM4,CRHR1,HRH2,HRH4,SSTR5,GRM2,NPS,POMC,ITIH1,HTR6,ADRA2A,C3,PDYN,HP,ADORA1,…
DB00996	Gabapentin	450	HTR1A,ACKR3,ADRA2B,CNR2,NPY1R,GABBR1,ANXA1,SSTR4,PNOC,DRD4,CXCR6,HCAR3,APP,CNR1,DRD3,MCHR1,HTR1D,GRM7,SST,HTR1B,GNAI2,HTR1F,LPAR2,CXCL8,ADRA2C,NPY,GNB1,HTR5A,OPRK1,HRH3,HCAR2,GRM8,GRM4,HRH4,SSTR5,GRM2,POMC,ADRA2A,C3,PDYN,ADORA1,GABBR2,CACNA1B,CHRM4,PTGER3,CCR5,MTNR1A,MTNR1B,MCHR2
DB13069	Not Mapped	451
DB06729	Sulfaphenazole	451
DB13601	Not Mapped	451
DB08849	Not Mapped	451
DB04819	Methapyrilene	451
DB00280	Disopyramide	452	HTR1A,ACKR3,VAMP2,HCRTR1,NMB,TACR3,ADRA2B,CNR2,NPY1R,STON2,TAC1,GABBR1,ANXA1,SSTR4,PNOC,ARRB2,DRD4,APOB,GRM1,GRP,CXCR6,HCAR3,SLC1A5,APP,CNR1,CACNA1I,DRD3,MCHR1,CLTB,DNM2,HTR1D,GSN,GRM7,SST,PIK3C2A,GFAP,HRH1,ADRA1A,DNAJC6,HTR1B,CCK,GNAI2,NTS,GRB2,NTSR1,EGF,JARID2,HTR1F,LPAR2,GHRL,APOE,P2RY2,CXCL8,ADRA2C,NPY,NPSR1,GNB1,AVP,HTR5A,OPRK1,SH3GL2,HRH3,CHRM1,HCAR2,TACR1,CNOT1,GRM8,ACTR2,GRM4,F2R,HRH4,SST…
DB02959	Oxitriptan	451
DB00437	Allopurinol	451
DB01971	trans-urocanic acid	451
DB11371	Alfaxalone	451
DB00982	Isotretinoin	451
DB01054	Nitrendipine	451
DB12870	Not Mapped	451
DB02224	(2s,3s)-Trans-Dihydroquercetin	451
DB13100	Not Mapped	451
DB00983	Formoterol	451
DB01064	Isoprenaline	449	ERBB4,VAMP2,PDGFRB,ADRB3,MAPK1,STON2,MC2R,BTC,ARRB2,CRH,YWHAZ,APOB,VIP,GNAS,CLTB,DNM2,NRG1,ADCYAP1,ADCYAP1R1,DRD5,PIK3C2A,DNAJC6,NRG2,TAAR1,TYROBP,MET,FGFR1,GRB2,LCK,GIPR,EGF,CDC42,FGF1,FYN,CD28,CYFIP1,NPSR1,GNB1,AVP,MC5R,YWHAB,SH3GL2,AKT1,ADM,AR,ACTR2,PIK3CA,F2R,CRHR1,HRH2,CHRM2,NPS,PIK3CB,HSP90AA1,CSF2RB,KIAA0319,POMC,HTR6,TF,ERBB3,MAPK3,HTR4,FGFR2,VIPR2,HTR7,IRS1,PIK3CD
DB01400	Neostigmine	451
DB00747	Scopolamine	452	HTR1A,ACKR3,ABCB1,VAMP2,HCRTR1,NMB,TACR3,ADRA2B,CNR2,NPY1R,STON2,TAC1,GABBR1,ANXA1,SSTR4,PNOC,ARRB2,DRD4,APOB,GRM1,GRP,CXCR6,HCAR3,APP,CNR1,DRD3,MCHR1,CLTB,DNM2,HTR1D,GRM7,SST,PIK3C2A,HRH1,ADRA1A,DNAJC6,HTR1B,CCK,GNAI2,NTS,GRB2,NTSR1,EGF,HTR1F,LPAR2,GHRL,P2RY2,CXCL8,ADRA2C,NPY,NPSR1,GNB1,AVP,HTR5A,OPRK1,SH3GL2,HRH3,CHRM1,HCAR2,CHRM5,TACR1,GRM8,ACTR2,GRM4,F2R,HRH4,SSTR5,CHRM2,OXTR,GRM2,NPS,P2RY1,K…
DB00575	Clonidine	443	ABCB1,CYP2D6,HCRTR1,NMB,TACR3,ADRA2B,TAC1,ANXA1,DRD4,GRM1,GRP,SLC22A4,SLC1A5,CYP3A5,APP,CACNA1I,GSN,GFAP,HRH1,ADRA1A,CCK,GNAI2,NTS,NTSR1,JARID2,LPAR2,GHRL,APOE,P2RY2,ADRA2C,NPSR1,GNB1,CHRM1,CHRM5,TACR1,CNOT1,F2R,OXTR,NPS,P2RY1,POMC,ITIH1,GRM5,CCKBR,OXT,AVPR1A,CYSLTR2,ADRA2A,HCRT,HP,EDNRA,CYP1A2,CCKAR,ADRA1D,SCAF1,CYP3A4,PRSS3
DB00544	Fluorouracil	451
DB07348	1,6,7,8,9,11A,12,13,14,14A-DECAHYDRO-1,13-DIHYDROXY-6-METHYL-4H-CYCLOPENT[F]OXACYCLOTRIDECIN-4-ONE	451
DB00598	Labetalol	449	VAMP2,CYP2D6,ADRB3,STON2,MC2R,ARRB2,CRH,APOB,VIP,GNAS,CLTB,DNM2,ADCYAP1,ADCYAP1R1,DRD5,PIK3C2A,DNAJC6,TAAR1,GRB2,GIPR,EGF,NPSR1,GNB1,AVP,MC5R,SH3GL2,ADM,ACTR2,CRHR1,HRH2,CHRM2,NPS,KIAA0319,POMC,HTR6,TF,HTR4,VIPR2,HTR7
DB13520	Not Mapped	451
DB02052	Indirubin-3'-Monoxime	451	WNT1,GSK3B,CDK5,YWHAE,RPGRIP1L,YWHAG,TUBB,PLXNA2,APC,UBE2D1,CSNK1E,SDCCAG8,PCNT,AHI1,TUBB4B,CDC25A,HSP90AA1,CDK5R1,NDE1,CDC25C,CTNNB1,CSNK1D,PCM1,PAFAH1B1,TUBA1A,ATM
DB06266	Not Mapped	451
DB12869	Not Mapped	451
DB04841	Flunarizine	443	DLG4,CYP2D6,HCRTR1,NMB,TACR3,TAC1,GRM1,GRP,SLC1A5,APP,CACNA1I,NFATC3,CALM3,GSN,GFAP,HRH1,ADRA1A,CAMK2A,CCK,NTS,GRB2,NTSR1,JARID2,LPAR2,GHRL,APOE,P2RY2,NPSR1,GNB1,CHRM1,AKT1,CHRM5,TACR1,CNOT1,GRIN2D,NEFL,F2R,OXTR,NPS,HSP90AA1,P2RY1,ITIH1,GRIN2A,GRM5,CAMK2B,CCKBR,PPP3R1,OXT,AVPR1A,CYSLTR2,HCRT,HP,EDNRA,PPP3CA,CYP1A2,CYP2B6,SOS1,CCKAR,ADRA1D,SCAF1,GRIN2C,PRSS3
DB00623	Fluphenazine	450	HTR1A,ACKR3,DLG4,ABCB1,CYP2D6,ADRB3,DRD1,ADRA2B,CNR2,NPY1R,GABBR1,ANXA1,SSTR4,PNOC,MC2R,CRH,CXCR6,VIP,HCAR3,GNAS,APP,ANKK1,CNR1,MCHR1,ADCYAP1,ADCYAP1R1,NFATC3,HTR1D,CALM3,GRM7,SST,CAMK2A,HTR1B,TAAR1,GNAI2,GRB2,GIPR,HTR1F,LPAR2,CYP2E1,CXCL8,ADRA2C,NPY,NPSR1,GNB1,HTR5A,MC5R,OPRK1,HRH3,AKT1,HCAR2,ADM,GRM8,GRIN2D,NEFL,GRM4,CRHR1,HRH2,HRH4,SSTR5,DRD2,GRM2,NPS,HSP90AA1,POMC,GRIN2A,CAMK2B,PPP3R1,HTR6,AD…
DB00283	Clemastine	443	CYP2D6,HCRTR1,NMB,TACR3,TAC1,GRM1,GRP,APP,HRH1,ADRA1A,CCK,NTS,NTSR1,LPAR2,GHRL,P2RY2,NPSR1,GNB1,CHRM1,CHRM5,TACR1,F2R,OXTR,NPS,P2RY1,GRM5,CCKBR,OXT,AVPR1A,CYSLTR2,HCRT,EDNRA,CCKAR,ADRA1D,CYP3A4
DB00841	Dobutamine	449	VAMP2,ADRB3,STON2,MC2R,ARRB2,CRH,APOB,VIP,GNAS,CLTB,DNM2,ADCYAP1,ADCYAP1R1,DRD5,PIK3C2A,DNAJC6,TAAR1,GRB2,GIPR,EGF,NPSR1,GNB1,AVP,MC5R,SH3GL2,ADM,ACTR2,CRHR1,HRH2,CHRM2,NPS,KIAA0319,POMC,HTR6,TF,COMT,HTR4,VIPR2,HTR7
DB12783	Not Mapped	451
DB02587	Colforsin	449	ADORA2A,ABCB1,PDE4A,ADRB3,DRD1,GNAL,MC2R,CRH,VIP,GNAS,MC4R,ADCYAP1,ADCYAP1R1,DRD5,ADCY7,TAAR1,GNAI2,GIPR,NPSR1,GNB1,AVP,MC5R,ADM,PDE4B,CRHR1,HRH2,NPS,POMC,HTR6,HTR4,VIPR2,HTR7
DB00472	Fluoxetine	451
DB00450	Droperidol	452	HTR1A,ACKR3,HCRTR1,NMB,TACR3,ADRA2B,CNR2,NPY1R,TAC1,GABBR1,ANXA1,SSTR4,PNOC,GRM1,GRP,CXCR6,HCAR3,APP,ANKK1,CNR1,MCHR1,HTR1D,GRM7,SST,HRH1,ADRA1A,HTR1B,CCK,GNAI2,NTS,NTSR1,HTR1F,LPAR2,GHRL,P2RY2,CXCL8,ADRA2C,NPY,NPSR1,GNB1,HTR5A,OPRK1,HRH3,CHRM1,HCAR2,CHRM5,TACR1,GRM8,GRM4,F2R,HRH4,SSTR5,DRD2,OXTR,GRM2,NPS,P2RY1,POMC,GRM5,CCKBR,OXT,AVPR1A,CYSLTR2,ADRA2A,HCRT,C3,PDYN,EDNRA,ADORA1,CCKAR,ADRA1D,GABBR…
DB00206	Reserpine	451
DB04209	Dequadin	451
DB12551	Not Mapped	451
DB00836	Loperamide	450	HTR1A,ACKR3,DLG4,ABCB1,CYP2D6,GNAO1,ADRB3,ADRA2B,CNR2,NPY1R,GABBR1,ANXA1,SSTR4,PNOC,MC2R,DRD4,CXCR6,HCAR3,GNAS,APP,CNR1,DRD3,MCHR1,MC4R,ADCYAP1R1,DRD5,NFATC3,HTR1D,CALM3,GRM7,SST,CAMK2A,HTR1B,TAAR1,GNAI2,GRB2,GIPR,HTR1F,LPAR2,CXCL8,ADRA2C,NPY,NPSR1,GNB1,HTR5A,MC5R,OPRK1,HRH3,AKT1,HCAR2,GRM8,GRIN2D,NEFL,GRM4,HRH2,HRH4,SSTR5,CHRM2,GRM2,HSP90AA1,POMC,GRIN2A,CAMK2B,CACNA1A,PPP3R1,HTR6,ADRA2A,OPRM1,C3…
DB00608	Chloroquine	451
DB01388	Mibefradil	451
DB12610	Not Mapped	451
DB01200	Bromocriptine	452	HTR1A,ACKR3,ABCB1,ADRB3,HCRTR1,NMB,TACR3,DRD1,ADRA2B,CNR2,NPY1R,TAC1,GABBR1,ANXA1,SSTR4,PNOC,MC2R,CRH,DRD4,GRM1,GRP,CXCR6,VIP,HCAR3,SLC1A5,GNAS,APP,ANKK1,CNR1,CACNA1I,DRD3,MCHR1,ADCYAP1,ADCYAP1R1,DRD5,HTR1D,GSN,GRM7,SST,GFAP,HRH1,ADRA1A,HTR1B,TAAR1,CCK,GNAI2,NTS,NTSR1,GIPR,JARID2,HTR1F,LPAR2,GHRL,APOE,P2RY2,CXCL8,ADRA2C,NPY,NPSR1,GNB1,HTR5A,MC5R,OPRK1,HRH3,CHRM1,HCAR2,ADM,CHRM5,TACR1,CNOT1,HTR2A,…
DB09202	Cirazoline	443	HCRTR1,NMB,TACR3,TAC1,GRM1,GRP,SLC1A5,APP,CACNA1I,GSN,GFAP,HRH1,ADRA1A,CCK,NTS,NTSR1,JARID2,LPAR2,GHRL,APOE,P2RY2,NPSR1,GNB1,CHRM1,CHRM5,TACR1,CNOT1,F2R,OXTR,NPS,P2RY1,ITIH1,GRM5,CCKBR,OXT,AVPR1A,CYSLTR2,HCRT,HP,EDNRA,CCKAR,ADRA1D,SCAF1,PRSS3
DB00920	Ketotifen	443	HCRTR1,NMB,TACR3,TAC1,GRM1,GRP,APP,HRH1,ADRA1A,CCK,NTS,NTSR1,LPAR2,GHRL,P2RY2,NPSR1,GNB1,CHRM1,CHRM5,TACR1,F2R,OXTR,NPS,P2RY1,GRM5,CCKBR,OXT,AVPR1A,CYSLTR2,HCRT,EDNRA,CCKAR,ADRA1D
DB07352	5,7-dihydroxy-2-(4-hydroxyphenyl)-4H-chromen-4-one	451
DB03701	Vanoxerine	451
DB01242	Clomipramine	443	ABCB1,CYP2D6,APOC3,APOA1,HCRTR1,NMB,TACR3,FN1,DICER1,TAC1,GABBR1,GRM1,GRP,SLC6A4,SLC1A5,APP,CACNA1I,GSN,GFAP,HRH1,ADRA1A,CCK,NTS,NTSR1,JARID2,LPAR2,DMD,GHRL,APOE,P2RY2,MYL4,NPSR1,GNB1,CHRM1,GSTP1,CHRM5,TACR1,CNOT1,HTR2A,PDE4B,F2R,OXTR,NPS,P2RY1,ITIH1,GRM5,PALB2,HTR2C,SLC6A2,CCKBR,OXT,CFB,AVPR1A,CYSLTR2,HCRT,HP,EDNRA,CYP1A2,CCKAR,ADRA1D,SCAF1,CYP3A4,CYP2C19,PRSS3,TTR,ATM
DB12890	Not Mapped	451
DB00938	Salmeterol	449	VAMP2,ADRB3,STON2,MC2R,ARRB2,CRH,APOB,VIP,GNAS,CYP3A5,CLTB,DNM2,ADCYAP1,ADCYAP1R1,DRD5,PIK3C2A,DNAJC6,TAAR1,GRB2,GIPR,EGF,NPSR1,GNB1,AVP,MC5R,SH3GL2,ADM,ACTR2,CRHR1,HRH2,CHRM2,NPS,KIAA0319,POMC,HTR6,TF,HTR4,CYP3A4,VIPR2,HTR7
DB11937	Not Mapped	451
DB01151	Desipramine	452	HTR1A,ACKR3,ABCB1,VAMP2,CYP2D6,SMPD1,ADRB3,HCRTR1,NMB,TACR3,ADRA2B,CNR2,NPY1R,STON2,TAC1,GABBR1,ANXA1,SSTR4,PNOC,MC2R,ARRB2,CRH,DRD4,APOB,GRM1,GRP,SLC6A4,CXCR6,VIP,HCAR3,SLC22A4,GNAS,APP,ANKK1,CNR1,DRD3,MCHR1,CLTB,DNM2,ADCYAP1,ADCYAP1R1,DRD5,HTR1D,GRM7,SST,PIK3C2A,HRH1,ADRA1A,DNAJC6,HTR1B,TAAR1,CCK,GNAI2,NTS,GRB2,NTSR1,GIPR,EGF,HTR1F,LPAR2,GHRL,P2RY2,CYP2E1,CXCL8,ADRA2C,NPY,NPSR1,GNB1,AVP,HTR5A,M…
DB11948	Not Mapped	451
DB01118	Amiodarone	451
DB00866	Alprenolol	450	HTR1A,ACKR3,VAMP2,CYP2D6,ADRB3,ADRA2B,CNR2,NPY1R,STON2,GABBR1,ANXA1,SSTR4,PNOC,MC2R,ARRB2,CRH,DRD4,APOB,CXCR6,VIP,HCAR3,GNAS,APP,CNR1,DRD3,MCHR1,CLTB,DNM2,ADCYAP1,ADCYAP1R1,DRD5,GRM7,SST,PIK3C2A,DNAJC6,TAAR1,GNAI2,GRB2,GIPR,EGF,LPAR2,CXCL8,ADRA2C,NPY,NPSR1,GNB1,AVP,MC5R,OPRK1,SH3GL2,HRH3,HCAR2,ADM,GRM8,ACTR2,GRM4,CRHR1,HRH2,HRH4,SSTR5,CHRM2,GRM2,NPS,KIAA0319,POMC,HTR6,ADRA2A,TF,C3,PDYN,ADORA1,HTR…
DB00257	Clotrimazole	451
DB00602	Ivermectin	451
DB11186	Not Mapped	451
DB00455	Loratadine	451
DB07995	N-[2-(4-BROMOCINNAMYLAMINO)ETHYL]-5-ISOQUINOLINE SULFONAMIDE	451
DB00949	Felbamate	451	DLG4,EPHB2,EFNB2,EFNB1,GRIN1,CALM3,CAMK2A,GRB2,FYN,CYP2E1,GRIN2D,NEFL,GRIN2B,GRIN2A,CAMK2B,SOS1,GRIN3A,CYP3A4,GRIN2C,CYP2C19
DB13393	Not Mapped	451
DB00714	Apomorphine	452	HTR1A,ACKR3,ADRB3,HCRTR1,NMB,TACR3,DRD1,ADRA2B,CNR2,NPY1R,TAC1,GABBR1,ANXA1,SSTR4,PNOC,MC2R,CRH,DRD4,GRM1,GRP,CXCR6,CALY,VIP,HCAR3,GNAS,APP,ANKK1,CNR1,DRD3,MCHR1,ADCYAP1,ADCYAP1R1,DRD5,HTR1D,GRM7,SST,HRH1,ADRA1A,HTR1B,TAAR1,CCK,GNAI2,NTS,NTSR1,GIPR,HTR1F,LPAR2,GHRL,P2RY2,CXCL8,ADRA2C,NPY,NPSR1,GNB1,HTR5A,MC5R,OPRK1,HRH3,CHRM1,HCAR2,ADM,CHRM5,TACR1,HTR2A,GRM8,GRM4,F2R,CRHR1,HRH2,HRH4,SSTR5,DRD2,OX…
DB00960	Pindolol	450	HTR1A,ACKR3,VAMP2,CYP2D6,ADRB3,ADRA2B,CNR2,NPY1R,STON2,GABBR1,ANXA1,SSTR4,PNOC,MC2R,ARRB2,CRH,DRD4,APOB,CXCR6,VIP,HCAR3,GNAS,APP,CNR1,DRD3,MCHR1,CLTB,DNM2,ADCYAP1,ADCYAP1R1,DRD5,GRM7,SST,PIK3C2A,DNAJC6,HTR1B,TAAR1,GNAI2,GRB2,GIPR,EGF,LPAR2,CXCL8,ADRA2C,NPY,NPSR1,GNB1,AVP,MC5R,OPRK1,SH3GL2,HRH3,HCAR2,ADM,GRM8,ACTR2,GRM4,CRHR1,HRH2,HRH4,SSTR5,CHRM2,GRM2,NPS,KIAA0319,POMC,HTR6,ADRA2A,TF,C3,PDYN,ADOR…
DB00356	Chlorzoxazone	451
DB00958	Carboplatin	451
DB00993	Azathioprine	451
DB13313	Not Mapped	451
DB02054	Gabaculine	451
DB00531	Cyclophosphamide	451
DB04599	Aniracetam	452	HTR1A,ACKR3,HCRTR1,NMB,TACR3,ADRA2B,CNR2,NPY1R,TAC1,GABBR1,ANXA1,SSTR4,PNOC,GRM1,GRP,CXCR6,HCAR3,APP,ANKK1,CNR1,MCHR1,HTR1D,GRM7,SST,HRH1,ADRA1A,PRKCA,HTR1B,CCK,GNAI2,NTS,NTSR1,HTR1F,LPAR2,GHRL,P2RY2,CXCL8,ADRA2C,NPY,NPSR1,GNB1,HTR5A,OPRK1,HRH3,GRIA1,CHRM1,HCAR2,CHRM5,TACR1,HTR2A,GRM8,GRM4,F2R,HRH4,SSTR5,DRD2,OXTR,GRM2,NPS,P2RY1,POMC,GRM5,GRIA4,GRIP1,CCKBR,OXT,AVPR1A,CYSLTR2,ADRA2A,GRIA3,HCRT,C3,…
DB01212	Ceftriaxone	451	APOC3,APOA1,FN1,DICER1,GABBR1,GLUL,SLC1A5,CACNA1I,GSN,GFAP,JARID2,DMD,APOE,MYL4,CNOT1,PDE4B,ITIH1,PALB2,CFB,HP,SCAF1,PRSS3,TTR,ATM
DB13715	Not Mapped	451
DB01223	Aminophylline	450	HTR1A,ACKR3,ADRA2B,CNR2,NPY1R,GABBR1,ANXA1,SSTR4,PNOC,DRD4,CXCR6,HCAR3,APP,CNR1,DRD3,MCHR1,HTR1D,HDAC2,GRM7,SST,HTR1B,GNAI2,HTR1F,LPAR2,CYP2E1,CXCL8,ADRA2C,NPY,GNB1,HTR5A,OPRK1,HRH3,HCAR2,GRM8,GRM4,HRH4,SSTR5,GRM2,POMC,ADRA2A,C3,PDYN,ADORA1,CYP1A2,GABBR2,CYP3A4,CHRM4,PTGER3,CCR5,MTNR1A,MTNR1B,MCHR2
DB00366	Doxylamine	443	HCRTR1,NMB,TACR3,TAC1,GRM1,GRP,APP,HRH1,ADRA1A,CCK,NTS,NTSR1,LPAR2,GHRL,P2RY2,NPSR1,GNB1,CHRM1,CHRM5,TACR1,F2R,OXTR,NPS,P2RY1,GRM5,CCKBR,OXT,AVPR1A,CYSLTR2,HCRT,EDNRA,CCKAR,ADRA1D
DB00395	Carisoprodol	451
DB00501	Cimetidine	451
DB00357	Aminoglutethimide	451
DB00368	Norepinephrine	449	VAMP2,ADRB3,HCRTR1,NMB,STXBP1,TACR3,ADRA2B,STON2,TAC1,ANXA1,MC2R,ARRB2,CRH,DRD4,APOB,GRM1,STX1A,GRP,VIP,SLC1A5,GNAS,APP,CACNA1I,CLTB,DNM2,ADCYAP1,ADCYAP1R1,DRD5,GSN,PIK3C2A,GFAP,HRH1,ADRA1A,DNAJC6,TAAR1,CCK,GNAI2,NTS,GRB2,NTSR1,GIPR,EGF,JARID2,LPAR2,GHRL,APOE,P2RY2,ADRA2C,NPSR1,GNB1,AVP,MC5R,SH3GL2,CHRM1,ADM,CHRM5,TACR1,CNOT1,ACTR2,F2R,CRHR1,HRH2,CPLX1,CHRM2,OXTR,NPS,P2RY1,KIAA0319,POMC,ITIH1,GRM…
DB07347	4-(2-AMINOETHYL)BENZENESULFONYL FLUORIDE	451
DB01222	Budesonide	451
DB00335	Atenolol	449	ABCB1,VAMP2,ADRB3,STON2,MC2R,ARRB2,CRH,APOB,VIP,GNAS,CLTB,DNM2,ADCYAP1,ADCYAP1R1,DRD5,PIK3C2A,DNAJC6,TAAR1,GRB2,GIPR,EGF,NPSR1,GNB1,AVP,MC5R,SH3GL2,ADM,ACTR2,CRHR1,HRH2,CHRM2,NPS,KIAA0319,POMC,HTR6,TF,HTR4,VIPR2,HTR7
DB00563	Methotrexate	451
DB01019	Bethanechol	450	HTR1A,ACKR3,VAMP2,ADRA2B,CNR2,NPY1R,STON2,GABBR1,ANXA1,SSTR4,PNOC,ARRB2,DRD4,APOB,CXCR6,HCAR3,APP,CNR1,DRD3,MCHR1,CLTB,DNM2,HTR1D,GRM7,SST,PIK3C2A,DNAJC6,HTR1B,GNAI2,GRB2,EGF,HTR1F,LPAR2,CXCL8,ADRA2C,NPY,GNB1,AVP,HTR5A,OPRK1,SH3GL2,HRH3,HCAR2,GRM8,ACTR2,GRM4,HRH4,SSTR5,CHRM2,GRM2,KIAA0319,POMC,ADRA2A,TF,C3,PDYN,ADORA1,GABBR2,PTGER3,CCR5,MTNR1A,MTNR1B,MCHR2
DB00564	Carbamazepine	451
DB03127	Benzamidine	451
DB01530	5alpha-androstane-3alpha,17beta-diol	451
DB13233	Not Mapped	451
DB00411	Carbachol	452	HTR1A,ACKR3,PLA2G4A,VAMP2,HCRTR1,NMB,TACR3,ADRA2B,CNR2,NPY1R,STON2,TAC1,GABBR1,ANXA1,SSTR4,PNOC,ARRB2,DRD4,APOB,GRM1,GRP,CXCR6,HCAR3,PLA2G4C,APP,CNR1,DRD3,MCHR1,CLTB,DNM2,HTR1D,GRM7,SST,PIK3C2A,HRH1,ADRA1A,DNAJC6,HTR1B,CCK,GNAI2,NTS,GRB2,NTSR1,EGF,HTR1F,LPAR2,GHRL,P2RY2,CXCL8,ADRA2C,NPY,NPSR1,GNB1,AVP,HTR5A,OPRK1,SH3GL2,HRH3,CHRM1,HCAR2,TACR1,GRM8,ACTR2,GRM4,F2R,HRH4,SSTR5,CHRM2,OXTR,GRM2,NPS,P2R…
DB00276	Amsacrine	451
DB00847	Cysteamine	450	HTR1A,ACKR3,ADRA2B,CNR2,NPY1R,GABBR1,ANXA1,SSTR4,PNOC,DRD4,CXCR6,HCAR3,APP,CNR1,DRD3,MCHR1,HTR1D,GRM7,SST,HTR1B,GNAI2,HTR1F,LPAR2,CXCL8,ADRA2C,NPY,GNB1,HTR5A,OPRK1,HRH3,HCAR2,GRM8,GRM4,HRH4,SSTR5,CHRM2,GRM2,POMC,ADRA2A,OPRM1,C3,PDYN,ADORA1,GABBR2,CHRM4,GRM3,PTGER3,CCR5,MTNR1A,MTNR1B,MCHR2
DB00648	Mitotane	451
DB13499	Not Mapped	451
DB02527	Cyclic Adenosine Monophosphate	451
DB01536	4-Androstenedione	451
DB01394	Colchicine	451
DB04840	Debrisoquin	451
DB00488	Altretamine	451
DB00215	Citalopram	443	ABCB1,CYP2D6,HCRTR1,NMB,TACR3,TAC1,GRM1,GRP,SLC6A4,APP,HRH1,ADRA1A,CCK,SLC6A3,NTS,NTSR1,LPAR2,GHRL,P2RY2,CYP2E1,NPSR1,GNB1,CHRM1,CHRM5,TACR1,F2R,OXTR,NPS,P2RY1,GRM5,SLC6A2,CCKBR,OXT,AVPR1A,CYSLTR2,HCRT,EDNRA,CYP1A2,CYP2B6,CCKAR,ADRA1D,CYP3A4,CYP2C19
DB00443	Betamethasone	451
DB01333	Cefradine	451
DB01139	Cefapirin	451
DB06543	Not Mapped	451
DB14086	Not Mapped	451
DB00640	Adenosine	450	ADORA2A,HTR1A,ACKR3,ADRB3,ADRA2B,CNR2,NPY1R,GABBR1,ANXA1,SSTR4,PNOC,MC2R,CRH,DRD4,CXCR6,VIP,HCAR3,GNAS,APP,CNR1,DRD3,MCHR1,ADCYAP1,ADCYAP1R1,DRD5,HTR1D,GRM7,SST,HTR1B,TAAR1,GNAI2,GIPR,HTR1F,LPAR2,CXCL8,ADRA2C,NPY,NPSR1,GNB1,HTR5A,MC5R,OPRK1,HRH3,HCAR2,ADM,GRM8,GRM4,CRHR1,HRH2,HRH4,SSTR5,GRM2,NPS,POMC,HTR6,ADRA2A,C3,PDYN,ADORA1,HTR4,GABBR2,CHRM4,VIPR2,PTGER3,HTR7,CCR5,MTNR1A,MTNR1B,MCHR2
DB00201	Caffeine	450	ADORA2A,HTR1A,ACKR3,ABCB1,ERBB4,CYP2D6,PDGFRB,ADRB3,ADRA2B,CNR2,RPA1,NPY1R,GABBR1,ANXA1,SSTR4,PNOC,MC2R,BTC,TP53,CRH,DRD4,CXCR6,VIP,HCAR3,SLC1A5,GNAS,CYP3A5,APP,CNR1,CACNA1I,DRD3,MCHR1,NRG1,ADCYAP1,ADCYAP1R1,DRD5,KDM4A,UBE2N,HTR1D,GSN,ADCY7,GRM7,SST,GFAP,HTR1B,NRG2,TAAR1,TYROBP,GNAI2,MET,FGFR1,GRB2,LCK,GIPR,UBE2I,EGF,JARID2,HTR1F,LPAR2,FGF1,FYN,APOE,CD28,CYP2E1,KAT5,CXCL8,ADRA2C,NPY,NPSR1,GNB1,HT…
DB01327	Cefazolin	451
DB04652	(11-BETA)-11,21-DIHYDROXY-PREGN-4-ENE-3,20-DIONE	451
DB04690	Camptothecin	451
DB06709	Methacholine	443	HCRTR1,NMB,TACR3,TAC1,GRM1,GRP,APP,HRH1,ADRA1A,CCK,NTS,NTSR1,LPAR2,GHRL,P2RY2,NPSR1,GNB1,TACR1,F2R,OXTR,NPS,P2RY1,GRM5,CCKBR,OXT,AVPR1A,CYSLTR2,HCRT,EDNRA,CCKAR,ADRA1D
DB04253	CB1954	451	NQO2
DB06151	Acetylcysteine	451	NFKB1,DLG4,EPHB2,EFNB2,EFNB1,GRIN1,UBE2N,CALM3,RIPK2,CAMK2A,GRB2,FYN,MAP3K8,RELA,GRIN2D,NEFL,GRIN2B,GRIN2A,REL,CAMK2B,SOS1,GRIN3A,GRIN2C
DB06707	Levonordefrin	451
DB01380	Cortisone acetate	451
DB00252	Phenytoin	451
DB03424	Ubenimex	451
DB00493	Cefotaxime	451	APOC3,APOA1,FN1,DICER1,GABBR1,SLC1A5,CACNA1I,GSN,GFAP,JARID2,DMD,APOE,MYL4,CNOT1,PDE4B,ITIH1,PALB2,CFB,HP,SCAF1,PRSS3,TTR,ATM
DB04839	Cyproterone acetate	451
DB01114	Chlorphenamine	443	CYP2D6,HCRTR1,NMB,TACR3,TAC1,GRM1,GRP,SLC6A4,CYP3A5,APP,HRH1,ADRA1A,CCK,SLC6A3,NTS,NTSR1,LPAR2,GHRL,P2RY2,NPSR1,GNB1,CHRM1,CHRM5,TACR1,F2R,OXTR,NPS,P2RY1,GRM5,SLC6A2,CCKBR,OXT,AVPR1A,CYSLTR2,HCRT,EDNRA,CCKAR,ADRA1D,CYP3A4
DB00456	Cefalotin	451
DB02736	Acetamide	451
DB11919	Not Mapped	451
DB00434	Cyproheptadine	452	HTR1A,ACKR3,VAMP2,HCRTR1,NMB,TACR3,ADRA2B,UGT1A3,CNR2,NPY1R,STON2,TAC1,GABBR1,ANXA1,SSTR4,PNOC,ARRB2,DRD4,APOB,GRM1,GRP,CXCR6,HCAR3,APP,CNR1,DRD3,MCHR1,CLTB,DNM2,HTR1D,GRM7,SST,PIK3C2A,HRH1,ADRA1A,DNAJC6,HTR1B,CCK,GNAI2,NTS,GRB2,NTSR1,EGF,HTR1F,LPAR2,GHRL,P2RY2,CXCL8,ADRA2C,NPY,NPSR1,GNB1,AVP,HTR5A,OPRK1,SH3GL2,HRH3,CHRM1,HCAR2,CHRM5,TACR1,HTR2A,GRM8,ACTR2,GRM4,F2R,HRH4,SSTR5,CHRM2,OXTR,GRM2,NPS,…
DB00606	Cyclothiazide	451
DB00262	Carmustine	451
DB09064	Not Mapped	451
DB00787	Aciclovir	451
DB00125	L-Arginine	451
DB00328	Indomethacin	451
DB00321	Amitriptyline	452	HTR1A,ACKR3,KCNQ3,KIDINS220,ABCB1,VAMP2,CYP2D6,GNAO1,APOC3,APOA1,ADRB3,HCRTR1,NMB,TACR3,ADRA2B,FN1,CNR2,DICER1,NPY1R,STON2,TAC1,GABBR1,ANXA1,SSTR4,PNOC,NTRK1,MC2R,ARRB2,CRH,DRD4,APOB,GRM1,GRP,SLC6A4,CXCR6,VIP,HCAR3,SLC1A5,GNAS,CYP3A5,APP,CNR1,CACNA1I,DRD3,MCHR1,CLTB,DNM2,ADCYAP1,ADCYAP1R1,DRD5,HTR1D,GSN,GRM7,SST,PIK3C2A,GFAP,HRH1,ADRA1A,NTRK2,DNAJC6,HTR1B,TAAR1,CCK,GNAI2,NTS,GRB2,NTSR1,GIPR,EGF,J…
DB00548	Azelaic Acid	451	SRD5A2,TYR
DB00928	Azacitidine	451
DB00943	Zalcitabine	451
DB00343	Diltiazem	451
DB00320	Dihydroergotamine	452	ACKR3,ABCB1,HCRTR1,NMB,TACR3,ADRA2B,CNR2,NPY1R,TAC1,GABBR1,ANXA1,SSTR4,PNOC,DRD4,GRM1,GRP,CXCR6,HCAR3,APP,CNR1,DRD3,MCHR1,HTR1D,GRM7,SST,HRH1,ADRA1A,HTR1B,CCK,GNAI2,NTS,NTSR1,LPAR2,GHRL,P2RY2,CXCL8,ADRA2C,NPY,NPSR1,GNB1,OPRK1,HRH3,CHRM1,HCAR2,CHRM5,TACR1,GRM8,GRM4,F2R,HRH4,SSTR5,OXTR,GRM2,NPS,P2RY1,POMC,GRM5,CCKBR,OXT,AVPR1A,CYSLTR2,ADRA2A,HCRT,C3,PDYN,EDNRA,ADORA1,CCKAR,ADRA1D,GABBR2,CYP3A4,CHRM…
DB01239	Chlorprothixene	452	HTR1A,ACKR3,ABCB1,VAMP2,ADRB3,HCRTR1,NMB,TACR3,DRD1,ADRA2B,CNR2,NPY1R,STON2,TAC1,GABBR1,ANXA1,SSTR4,PNOC,MC2R,ARRB2,CRH,DRD4,APOB,GRM1,GRP,CXCR6,VIP,HCAR3,GNAS,APP,ANKK1,CNR1,DRD3,MCHR1,CLTB,DNM2,ADCYAP1,ADCYAP1R1,HTR1D,GRM7,SST,PIK3C2A,HRH1,ADRA1A,DNAJC6,HTR1B,TAAR1,CCK,GNAI2,NTS,GRB2,NTSR1,GIPR,EGF,HTR1F,LPAR2,GHRL,P2RY2,CXCL8,ADRA2C,NPY,NPSR1,GNB1,AVP,HTR5A,MC5R,OPRK1,SH3GL2,HRH3,CHRM1,HCAR2,A…
DB00513	Aminocaproic Acid	451
DB00514	Dextromethorphan	450	HTR1A,ACKR3,ABCB1,CYP2D6,GNAO1,ADRA2B,CNR2,NPY1R,GABBR1,ANXA1,SSTR4,PNOC,DRD4,SLC6A4,CXCR6,HCAR3,CHRNA7,CYP3A5,APP,CNR1,DRD3,MCHR1,HTR1D,GRM7,SST,HTR1B,GNAI2,HTR1F,LPAR2,CYP2E1,CXCL8,ADRA2C,NPY,GNB1,HTR5A,OPRK1,HRH3,HCAR2,GRM8,CHRNB2,GRM4,CHRNA4,CHRNA3,HRH4,SSTR5,GRM2,POMC,SLC6A2,ADRA2A,OPRM1,SIGMAR1,C3,PDYN,ADORA1,CYP2B6,GABBR2,GRIN3A,CYP3A4,CHRM4,PTGER3,CYP2C19,CCR5,MTNR1A,MTNR1B,MCHR2
DB00945	Acetylsalicylic acid	451	NFKB1,PTGS1,ABCB1,APOC3,APOA1,FN1,MAPK1,DICER1,GABBR1,TP53,SLC1A5,CACNA1I,PTGS2,UBE2N,GSN,GFAP,RIPK2,JARID2,DMD,MAP3K8,GHRL,APOE,MYL4,GNB1,RELA,CNOT1,PDE4B,ITIH1,PALB2,REL,RPS6KA3,CFB,HP,EDNRA,PML,HSPA5,SCAF1,CDKN2A,CYP2C19,PRSS3,TTR,ATM
DB00568	Cinnarizine	452	HTR1A,ACKR3,CYP2D6,CACNA1C,HCRTR1,NMB,TACR3,ADRA2B,CNR2,NPY1R,TAC1,GABBR1,ANXA1,SSTR4,PNOC,GRM1,GRP,CXCR6,HCAR3,SLC1A5,APP,ANKK1,CNR1,CACNA1I,MCHR1,HTR1D,GSN,GRM7,SST,GFAP,HRH1,ADRA1A,HTR1B,CCK,GNAI2,NTS,NTSR1,JARID2,HTR1F,LPAR2,GHRL,APOE,P2RY2,CXCL8,ADRA2C,NPY,NPSR1,GNB1,HTR5A,OPRK1,HRH3,CHRM1,HCAR2,CHRM5,TACR1,CNOT1,GRM8,GRM4,F2R,HRH4,SSTR5,DRD2,OXTR,GRM2,NPS,P2RY1,POMC,ITIH1,GRM5,CCKBR,OXT,AVP…
DB00765	Metyrosine	451	TH
DB02032	1-(3-Mercapto-2-Methyl-Propionyl)-Pyrrolidine-2-Carboxylic Acid	451
DB04365	Arecoline	443	HCRTR1,NMB,TACR3,TAC1,GRM1,GRP,APP,HRH1,ADRA1A,CCK,NTS,NTSR1,LPAR2,GHRL,P2RY2,NPSR1,GNB1,CHRM1,TACR1,F2R,OXTR,NPS,P2RY1,GRM5,CCKBR,OXT,AVPR1A,CYSLTR2,HCRT,EDNRA,CCKAR,ADRA1D
DB00964	Apraclonidine	443	HCRTR1,NMB,TACR3,ADRA2B,TAC1,ANXA1,DRD4,GRM1,GRP,APP,HRH1,ADRA1A,CCK,GNAI2,NTS,NTSR1,LPAR2,GHRL,P2RY2,ADRA2C,NPSR1,GNB1,CHRM1,CHRM5,TACR1,F2R,OXTR,NPS,P2RY1,POMC,GRM5,CCKBR,OXT,AVPR1A,CYSLTR2,ADRA2A,HCRT,EDNRA,CCKAR,ADRA1D
DB00363	Clozapine	452	HTR1A,ACKR3,ABCB1,VAMP2,CYP2D6,ADRB3,HCRTR1,NMB,TACR3,DRD1,ADRA2B,CNR2,NPY1R,STON2,TAC1,GABBR1,ANXA1,SSTR4,PNOC,MC2R,ARRB2,CRH,DRD4,APOB,GRM1,GRP,CXCR6,CALY,VIP,HCAR3,SLC1A5,GNAS,APP,ANKK1,CNR1,CACNA1I,UGT1A4,DRD3,MCHR1,CLTB,DNM2,ADCYAP1,ADCYAP1R1,DRD5,HTR1D,GSN,GRM7,SST,PIK3C2A,GFAP,HRH1,ADRA1A,DNAJC6,HTR1B,TAAR1,CCK,GNAI2,NTS,GRB2,NTSR1,GIPR,EGF,JARID2,HTR1F,LPAR2,GHRL,APOE,P2RY2,CYP2E1,CXCL8,A…
DB00567	Cephalexin	451
DB00594	Amiloride	451
DB06637	Dalfampridine	451
DB01244	Bepridil	451
DB00195	Betaxolol	449	VAMP2,CYP2D6,ADRB3,STON2,MC2R,ARRB2,CRH,APOB,VIP,GNAS,CLTB,DNM2,ADCYAP1,ADCYAP1R1,DRD5,PIK3C2A,DNAJC6,TAAR1,GRB2,GIPR,EGF,NPSR1,GNB1,AVP,MC5R,SH3GL2,ADM,ACTR2,CRHR1,HRH2,CHRM2,NPS,KIAA0319,POMC,HTR6,TF,CYP1A2,HTR4,VIPR2,HTR7
DB08905	Formestane	451
DB00477	Chlorpromazine	452	HTR1A,ACKR3,DLG4,ABCB1,CYP2D6,SMPD1,APOC3,KCNH2,APOA1,ADRB3,HCRTR1,NMB,TACR3,DRD1,ADRA2B,FN1,CNR2,DICER1,NPY1R,TAC1,GABBR1,ANXA1,SSTR4,PNOC,MC2R,CRH,DRD4,GRM1,GRP,CXCR6,VIP,HCAR3,SLC1A5,GNAS,APP,ANKK1,CNR1,CACNA1I,DRD3,MCHR1,ADCYAP1,ADCYAP1R1,DRD5,NFATC3,HTR1D,CALM3,GSN,GRM7,SST,GFAP,HRH1,ADRA1A,CAMK2A,HTR1B,TAAR1,CCK,GNAI2,NTS,GRB2,NTSR1,GIPR,JARID2,HTR1F,LPAR2,DMD,GHRL,APOE,P2RY2,CYP2E1,CXCL8,A…
DB00819	Acetazolamide	451
DB01166	Cilostazol	451
DB00827	Cinoxacin	451
DB08878	Aminopterin	451
DB00672	Chlorpropamide	451
DB04228	(2r)-Amino(3,5-Dihydroxyphenyl)Acetic Acid	451
DB01158	Bretylium	451
DB00274	Cefmetazole	451	APOC3,APOA1,FN1,DICER1,GABBR1,SLC1A5,CACNA1I,GSN,GFAP,JARID2,DMD,APOE,MYL4,CNOT1,PDE4B,ITIH1,PALB2,CFB,HP,SCAF1,PRSS3,TTR,ATM
DB01997	3-Bromo-7-Nitroindazole	451	NOS1,NOS2,CALM3,AKT1,HSP90AA1,NOS3
DB11102	Not Mapped	451
DB00414	Acetohexamide	451
DB01156	Bupropion	451
DB00887	Bumetanide	451
DB12328	Not Mapped	451
DB00245	Benzatropine	443	CYP2D6,HCRTR1,NMB,TACR3,TAC1,GRM1,GRP,APP,HRH1,ADRA1A,CCK,SLC6A3,NTS,NTSR1,LPAR2,GHRL,P2RY2,NPSR1,GNB1,CHRM1,CHRM5,TACR1,F2R,OXTR,NPS,P2RY1,GRM5,CCKBR,OXT,AVPR1A,CYSLTR2,HCRT,EDNRA,CCKAR,ADRA1D,CYP2C19
DB00880	Chlorothiazide	451
DB04401	[Formylmethyl]Trimethyl-Ammonium, N,N,N-Trimethylammonium Acetaldehyde	451
DB02530	Gamma(Amino)-Butyric Acid	451
DB02153	3-Sulfinoalanine	451
DB00260	Cycloserine	451	DDC
DB08838	Agmatine	451	DLG4,EPHB2,EFNB2,ADRA2B,ANXA1,DRD4,EFNB1,APP,GRIN1,CALM3,CAMK2A,GNAI2,GRB2,FYN,ADRA2C,GNB1,GRIN2D,NEFL,GRIN2B,POMC,GRIN2A,CAMK2B,ADRA2A,SOS1,CACNA1B,GRIN2C
DB01142	Doxepin	452	HTR1A,ACKR3,ABCB1,VAMP2,CYP2D6,KCNH2,ADRB3,HCRTR1,NMB,TACR3,ADRA2B,CNR2,NPY1R,STON2,TAC1,GABBR1,ANXA1,SSTR4,PNOC,MC2R,ARRB2,CRH,DRD4,APOB,GRM1,GRP,SLC6A4,CXCR6,VIP,HCAR3,SLC1A5,GNAS,APP,ANKK1,CNR1,CACNA1I,DRD3,MCHR1,CLTB,DNM2,ADCYAP1,ADCYAP1R1,DRD5,HTR1D,GSN,GRM7,SST,PIK3C2A,GFAP,HRH1,ADRA1A,DNAJC6,HTR1B,TAAR1,CCK,GNAI2,NTS,GRB2,NTSR1,GIPR,EGF,JARID2,HTR1F,LPAR2,GHRL,APOE,P2RY2,CXCL8,ADRA2C,NPY,N…
DB00833	Cefaclor	451
DB12153	Not Mapped	451
DB08653	2-(1H-INDOL-3-YL)ETHANAMINE	451
DB00091	Cyclosporine	451
DB01143	Amifostine	451
DB05383	pimagedine HCl	451
DB00490	Buspirone	450	HTR1A,ACKR3,ABCB1,CYP2D6,ADRA2B,CNR2,NPY1R,GABBR1,ANXA1,SSTR4,PNOC,DRD4,CXCR6,HCAR3,CYP3A5,APP,ANKK1,CNR1,DRD3,MCHR1,HTR1D,GRM7,SST,HTR1B,GNAI2,HTR1F,LPAR2,CXCL8,ADRA2C,NPY,GNB1,HTR5A,OPRK1,HRH3,HCAR2,GRM8,GRM4,HRH4,SSTR5,DRD2,GRM2,POMC,ADRA2A,C3,PDYN,ADORA1,GABBR2,CYP3A4,CHRM4,PTGER3,CCR5,MTNR1A,MTNR1B,MCHR2
DB06756	Glycine betaine	451
DB13614	Not Mapped	451
DB00835	Brompheniramine	452	HTR1A,ACKR3,VAMP2,CYP2D6,HCRTR1,NMB,TACR3,ADRA2B,CNR2,NPY1R,STON2,TAC1,GABBR1,ANXA1,SSTR4,PNOC,ARRB2,DRD4,APOB,GRM1,GRP,CXCR6,HCAR3,APP,CNR1,DRD3,MCHR1,CLTB,DNM2,HTR1D,GRM7,SST,PIK3C2A,HRH1,ADRA1A,DNAJC6,HTR1B,CCK,GNAI2,NTS,GRB2,NTSR1,EGF,HTR1F,LPAR2,GHRL,P2RY2,CYP2E1,CXCL8,ADRA2C,NPY,NPSR1,GNB1,AVP,HTR5A,OPRK1,SH3GL2,HRH3,CHRM1,HCAR2,CHRM5,TACR1,GRM8,ACTR2,GRM4,F2R,HRH4,SSTR5,CHRM2,OXTR,GRM2,NPS…
DB00382	Tacrine	451
DB08927	Amperozide	443	HCRTR1,NMB,TACR3,TAC1,GRM1,GRP,APP,HRH1,ADRA1A,CCK,NTS,NTSR1,LPAR2,GHRL,P2RY2,NPSR1,GNB1,CHRM1,CHRM5,TACR1,HTR2A,F2R,OXTR,NPS,P2RY1,GRM5,CCKBR,OXT,AVPR1A,CYSLTR2,HCRT,EDNRA,CCKAR,ADRA1D
DB04348	Taurocholic Acid	451
DB00181	Baclofen	451	GABBR1,ANXA1,APP,GNAI2,GNB1,POMC,GABBR2
DB12870	Not Mapped	451
DB00925	Phenoxybenzamine	449	DLG4,VAMP2,ADRB3,HCRTR1,NMB,TACR3,ADRA2B,STON2,TAC1,ANXA1,MC2R,ARRB2,CRH,DRD4,APOB,GRM1,GRP,VIP,SLC1A5,GNAS,APP,CACNA1I,CLTB,DNM2,ADCYAP1,ADCYAP1R1,DRD5,NFATC3,CALM3,GSN,PIK3C2A,GFAP,HRH1,ADRA1A,CAMK2A,DNAJC6,TAAR1,CCK,GNAI2,NTS,GRB2,NTSR1,GIPR,EGF,JARID2,LPAR2,GHRL,APOE,P2RY2,ADRA2C,NPSR1,GNB1,AVP,MC5R,SH3GL2,CHRM1,AKT1,ADM,CHRM5,TACR1,CNOT1,ACTR2,GRIN2D,NEFL,F2R,CRHR1,HRH2,CHRM2,OXTR,NPS,HSP90A…
DB00783	Estradiol	451
DB00128	L-Aspartic Acid	451
DB03759	FG-9041	451	PRKCA,GRIA1,GRIA4,GRIP1,GRIA2,PRKCG
DB13758	Not Mapped	451
DB00572	Atropine	452	HTR1A,ACKR3,VAMP2,HCRTR1,NMB,TACR3,ADRA2B,CNR2,NPY1R,STON2,TAC1,GABBR1,ANXA1,SSTR4,PNOC,ARRB2,DRD4,APOB,GRM1,GRP,CXCR6,HCAR3,APP,CNR1,DRD3,MCHR1,CLTB,DNM2,HTR1D,GRM7,SST,PIK3C2A,HRH1,ADRA1A,DNAJC6,HTR1B,CCK,GNAI2,NTS,GRB2,NTSR1,EGF,HTR1F,LPAR2,GHRL,P2RY2,CXCL8,ADRA2C,NPY,NPSR1,GNB1,AVP,HTR5A,OPRK1,SH3GL2,HRH3,CHRM1,HCAR2,CHRM5,TACR1,GRM8,ACTR2,GRM4,F2R,HRH4,SSTR5,CHRM2,OXTR,GRM2,NPS,P2RY1,KIAA031…
DB01833	L-2-Amino-4-(Guanidinooxy)Butyric Acid	451
DB00915	Amantadine	450	HTR1A,ACKR3,ABCB1,ADRA2B,CNR2,NPY1R,GABBR1,ANXA1,SSTR4,PNOC,CXCR6,HCAR3,DDC,APP,ANKK1,CNR1,MCHR1,HTR1D,GRM7,SST,HTR1B,GNAI2,HTR1F,LPAR2,CXCL8,ADRA2C,NPY,GNB1,HTR5A,OPRK1,HRH3,HCAR2,GRM8,GRM4,HRH4,SSTR5,DRD2,GRM2,POMC,ADRA2A,C3,PDYN,ADORA1,GABBR2,GRIN3A,CHRM4,PTGER3,CCR5,MTNR1A,MAOB,MTNR1B,MCHR2
DB00543	Amoxapine	452	HTR1A,ACKR3,GABRA1,CYP2D6,ADRB3,HCRTR1,NMB,TACR3,DRD1,ADRA2B,CNR2,NPY1R,TAC1,GABBR1,ANXA1,SSTR4,PNOC,MC2R,CRH,DRD4,GRM1,GRP,SLC6A4,CXCR6,VIP,HCAR3,GNAS,APP,ANKK1,CNR1,DRD3,MCHR1,ADCYAP1,ADCYAP1R1,DRD5,HTR1D,GRM7,SST,HRH1,ADRA1A,HTR1B,TAAR1,CCK,SLC6A3,GNAI2,NTS,NTSR1,GIPR,HTR1F,LPAR2,GHRL,P2RY2,CXCL8,ADRA2C,NPY,NPSR1,GNB1,HTR5A,MC5R,OPRK1,HRH3,CHRM1,HCAR2,ADM,CHRM5,TACR1,HTR2A,GRM8,GRM4,F2R,CRHR1,…
DB00924	Cyclobenzaprine	443	CYP2D6,HCRTR1,NMB,TACR3,TAC1,GRM1,GRP,APP,HRH1,ADRA1A,CCK,NTS,NTSR1,LPAR2,GHRL,P2RY2,NPSR1,GNB1,CHRM1,CHRM5,TACR1,HTR2A,F2R,OXTR,NPS,P2RY1,GRM5,CCKBR,OXT,AVPR1A,CYSLTR2,HCRT,EDNRA,CYP1A2,CCKAR,ADRA1D,CYP3A4
